# Supplementary material for: Asymmetric synthesis of functionalized pyrrolizidines by an organocatalytic and pot-economy strategy
Source: Royal Society of Chemistry journal article supplement (doi:10.1039/c5ra25103f), 2016-01-01
Supplement: c5ra25103f1.pdf [file c5ra25103f1.pdf]

# Asymmetric Synthesis of Functionalized Pyrrolizidines by Organocatalytic and Pot-economy Strategy.

Chia-Hsin Lin,<sup>†</sup> Bor-Cherng Hong,<sup>\*,†</sup> and Gene-Hsiang Lee<sup>‡</sup>

<sup>†</sup>Department of Chemistry and Biochemistry, National Chung Cheng University, Chia-Yi, 621, Taiwan, R.O.C., and <sup>‡</sup>Instrumentation Center, National Taiwan University, Taipei, 106, Taiwan, R.O.C

*chebch@ccu.edu.tw*

## SUPPORTING INFORMATION:

Contents:

- (1) Experimental procedures and characterization data for compounds **2-4**.....Page 2–42
- (2) Spectra data for compounds **2-4**.....Page 43–234
- (3) *Ee* analysis by HPLC with chiral column, in Table 1 and Table 3.....Page 235–315

**General Procedure.** All solvents were reagent grade. Chemicals were purchased from Aldrich, TCI or Acros Chemical Co. Reactions were normally carried out under nitrogen atmosphere in glassware. Merck silica gel 60 (particle size 0.04-0.063 mm) was employed for flash chromatography. Melting points are uncorrected. <sup>1</sup>H NMR spectra were obtained in CDCl<sub>3</sub> unless otherwise noted at 400 MHz (Bruker DPX-400) or 500 MHz (Varian-Unity INOVA-500). <sup>13</sup>C NMR spectra were obtained at 100 MHz or 125 MHz. *E.e.* values were measured by HPLC on a chiral column (0.46 cm ID x 25 cm, particle size 5 μ) by elution with THF-hexane. Unless otherwise noted, the flow rate of the indicated elution solvent is maintained at 1 mL/min, and the retention time of a compound is recorded accordingly. HPLC was equipped with the ultraviolet and refractive index detectors. The melting point was recorded on a melting point apparatus (MPA100 – Automated melting point system, Stanford Research Systems, Inc.) and is uncorrected. The optical rotation values were recorded with a Jasco-P-2000 digital polarimeter.

### Preparation of (*S*)-methyl 4-nitro-3-phenylbutanoate (**2a**)

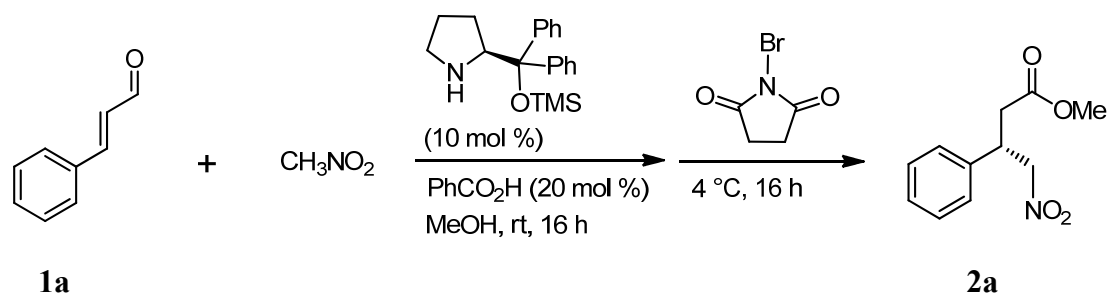

To a solution of cinnamaldehyde (158.6 mg, 1.2 mmol), (*S*)-2-(diphenyl(trimethylsilyloxy)methyl)pyrrolidine (39.1 mg, 0.12 mmol, 0.1 equiv) and benzoic acid (29.3 mg, 0.24 mmol, 0.2 equiv) in methanol (2.4 mL) was added nitromethane (219.7 mg, 3.6 mmol, 3.0 equiv) at ambient temperature. The resulting solution was stirred at room temperature for 16 h until the completion of the reaction, as monitored by TLC. The reaction temperature was then reduced to 4 °C, followed by the addition of *N*-bromosuccinimide (320.4 mg, 1.8 mmol, 1.5 equiv) to the reaction mixture. The resulting solution was vigorously stirred at 4 °C for 16 h until the completion of the reaction, as monitored by TLC. The reaction mixture was flushed through a small silica gel column with 20% EtOAc–hexane and concentrated *in vacuo* to give the orange oil residue. The crude product was purified by flash column chromatography with 15:10:75 EtOAc–CH<sub>2</sub>Cl<sub>2</sub>–hexane (*R<sub>f</sub>* = 0.31) to afford product **2a** (155.4 mg, 58% yield) as a pale yellow oil. Selected spectroscopic data of **2a**:  $[\alpha]_{\text{D}}^{23}$  –19.6 (*c* 0.5, CH<sub>2</sub>Cl<sub>2</sub>);<sup>1</sup> IR (neat): 3022, 2953, 1736, 1554, 1440, 1371, 1162, 1081, 998, 891, 768, 704 cm<sup>-1</sup>; <sup>1</sup>H NMR (400 MHz, CDCl<sub>3</sub>):  $\delta$  7.34 – 7.19 (m, 5H), 4.72 (dd, *J* = 12.6, 6.9 Hz, 1H), 4.62 (dd, *J* = 12.6, 7.9 Hz, 1H), 4.00 – 3.93 (m, 1H), 3.61 (s, 3H), 2.81 – 2.73 (m, 2H); <sup>13</sup>C NMR (100 MHz, CDCl<sub>3</sub>):  $\delta$  171.1 (C), 138.3 (C), 129.01 (2 CH), 128.0 (CH), 127.3 (2 CH), 79.4 (CH<sub>2</sub>), 51.9 (CH<sub>3</sub>), 40.1 (CH), 37.5 (CH<sub>2</sub>);<sup>2</sup> MS (*m/z*, relative intensity): 223 (*M*<sup>+</sup>, 0.4), 192 (18), 177 (32), 176 (90), 145 (43), 135 (54), 118 (86), 117 (100), 104 (57), 91 (50), 77 (33); exact mass calculated for C<sub>11</sub>H<sub>13</sub>O<sub>4</sub>N (*M*<sup>+</sup>): 223.0845; found: 223.0844.

<sup>1</sup> Lit.  $[\alpha]_{\text{D}}^{20}$  –18.8 (*c* 0.5, CH<sub>2</sub>Cl<sub>2</sub>), Jensen, K. L.; Poulsen, P. H.; Donslund, B. S.; Morana, F.; Jørgensen, K. A. *Org. Lett.* **2012**, *14*, 1516 – 1519.

<sup>2</sup> (a) Jensen, K. L.; Poulsen, P. H.; Donslund, B. S.; Morana, F.; Jørgensen, K. A. *Org. Lett.* **2012**, *14*, 1516 – 1519. (b) Baschieri, A.; Bernardi, L.; Ricci, A.; Suresh, S.; Adamo, M. F. A. *Angew. Chem. Int. Ed.* **2009**, *48*, 9342 – 9345.

### Preparation of (*S*)-methyl 3-(4-fluorophenyl)-4-nitrobutanoate (**2b**)

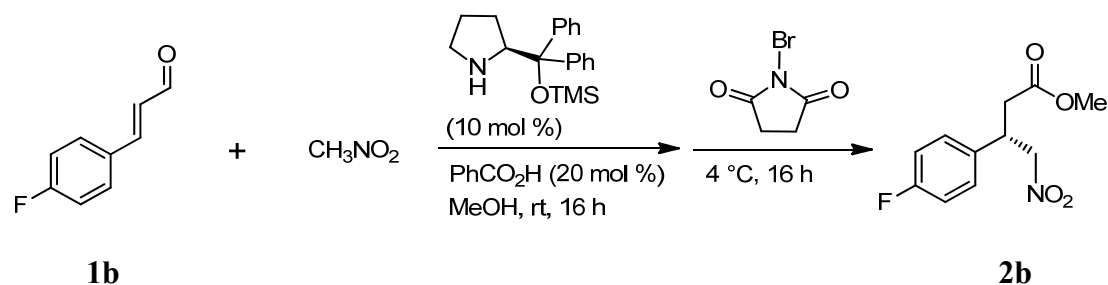

To a solution of (*E*)-3-(4-fluorophenyl)acrylaldehyde **1b** (150.1 mg, 1.0 mmol), (*S*)-2-(diphenyl(trimethylsilyloxy)methyl)pyrrolidine (32.6 mg, 0.1 mmol, 0.1 equiv) and benzoic acid (24.4 mg, 0.2 mmol, 0.2 equiv) in methanol (2 mL) was added nitromethane (183.1 mg, 3.0 mmol, 3.0 equiv) at ambient temperature. The resulting solution was stirred at room temperature for 16 h until the completion of the reaction, as monitored by TLC. The reaction temperature was then reduced to 4 °C, followed by the addition of *N*-bromosuccinimide (267 mg, 1.5 mmol, 1.5 equiv) to the reaction mixture. The resulting solution was vigorously stirred at 4 °C for 16 h until the completion of the reaction, as monitored by TLC. The reaction mixture was flushed through a small silica gel column with 20% EtOAc–hexane and concentrated *in vacuo* to give the orange oil residue. The crude product was purified by flash column chromatography with 5:10:85 EtOAc–CH<sub>2</sub>Cl<sub>2</sub>–hexane (*R<sub>f</sub>* = 0.14) to afford product **2b** (149.6 mg, 62% yield) as a yellow oil. Selected spectroscopic data of **2b**: [ $\alpha$ ]<sub>D</sub><sup>26</sup> –19.2 (*c* 0.4, CH<sub>2</sub>Cl<sub>2</sub>);<sup>3</sup> IR (neat): 2956, 2924, 1735, 1605, 1554, 1511, 1436, 1377, 1225, 1161, 1103, 836 cm<sup>-1</sup>; <sup>1</sup>H NMR (400 MHz, CDCl<sub>3</sub>):  $\delta$  7.21 – 7.16 (m, 2 H), 7.04 – 6.98 (m, 2 H), 4.70 (dd, *J* = 12.6, 6.8 Hz, 1 H), 4.59 (dd, *J* = 12.6, 8.1 Hz, 1 H), 3.99 – 3.92 (m, 1 H), 3.62 (s, 3 H), 2.79 – 2.67 (m, 2 H); <sup>13</sup>C NMR (100 MHz, CDCl<sub>3</sub>):  $\delta$  170.9 (C), 162.3 (d, *J* = 245 Hz, C), 134.0 (d, *J* = 4 Hz, C), 129.0 (d, *J* = 9 Hz, 2 CH), 116.1 (d, *J* = 22 Hz, 2 CH), 79.3 (CH<sub>2</sub>), 52.0 (CH<sub>3</sub>), 39.5 (CH), 37.5 (CH<sub>2</sub>);<sup>4</sup> MS (*m/z*, relative intensity): 241 (M<sup>+</sup>, 0.3), 195 (14), 194 (89), 163 (18), 153 (40), 136 (90), 135 (100), 122 (70), 109 (34); exact mass calculated for C<sub>11</sub>H<sub>12</sub>O<sub>4</sub>NF (M<sup>+</sup>): 241.0750; found: 241.0750.

<sup>3</sup> Lit. [ $\alpha$ ]<sub>D</sub><sup>20</sup> –19.4 (*c* 0.5, CH<sub>2</sub>Cl<sub>2</sub>), Jensen, K. L.; Poulsen, P. H.; Donslund, B. S.; Morana, F.; Jørgensen, K. A. *Org. Lett.* **2012**, *14*, 1516 – 1519.

<sup>4</sup> Jensen, K. L.; Poulsen, P. H.; Donslund, B. S.; Morana, F.; Jørgensen, K. A. *Org. Lett.* **2012**, *14*, 1516 – 1519.

### Preparation of (*S*)-methyl 3-(4-chlorophenyl)-4-nitrobutanoate (**2c**)

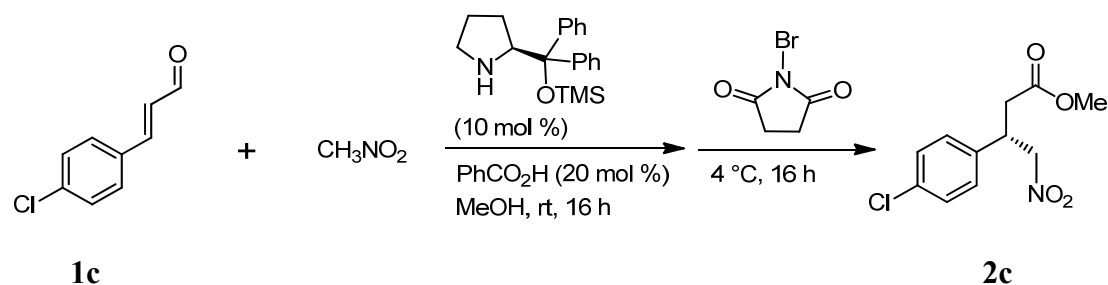

To a solution of (*E*)-3-(4-chlorophenyl)acrylaldehyde **1c** (166.6 mg, 1.0 mmol), (*S*)-2-(diphenyl(trimethylsilyloxy)methyl)pyrrolidine (32.6 mg, 0.1 mmol, 0.1 equiv) and benzoic acid (24.4 mg, 0.2 mmol, 0.2 equiv) in methanol (2 mL) was added nitromethane (183.1 mg, 3.0 mmol, 3.0 equiv) at ambient temperature. The resulting solution was stirred at room temperature for 16 h until the completion of the reaction, as monitored by TLC. The reaction temperature was then reduced to 4 °C, followed by the addition of *N*-bromosuccinimide (534 mg, 3.0 mmol, 3.0 equiv) to the reaction mixture. The resulting solution was vigorously stirred at 4 °C for 16 h until the completion of the reaction, as monitored by TLC. The reaction mixture was flushed through a small silica gel column with 20% EtOAc–hexane and concentrated *in vacuo* to give the orange oil residue. The crude product was purified by flash column chromatography with 5:10:85 EtOAc–CH<sub>2</sub>Cl<sub>2</sub>–hexane (*R<sub>f</sub>* = 0.17) to afford product **2c** (170.1 mg, 66% yield) as a yellow oil. Selected spectroscopic data of **2c**: [ $\alpha$ ]<sub>D</sub><sup>27</sup> –13.2 (*c* 0.4, CH<sub>2</sub>Cl<sub>2</sub>);<sup>5</sup> IR (neat): 2954, 2922, 2849, 1736, 1552, 1493, 1436, 1378, 1262, 1166, 1095, 1014, 830, 794, 732 cm<sup>-1</sup>; <sup>1</sup>H NMR (400 MHz, CDCl<sub>3</sub>):  $\delta$  7.30 (d, *J* = 8.5 Hz, 2 H), 7.15 (d, *J* = 8.5 Hz, 2 H), 4.70 (dd, *J* = 12.8, 6.9 Hz, 1 H), 4.59 (dd, *J* = 12.8, 8.2 Hz, 1 H), 3.99 – 3.91 (m, 1 H), 3.62 (s, 3 H), 2.79 – 2.67 (m, 2 H); <sup>13</sup>C NMR (100 MHz, CDCl<sub>3</sub>):  $\delta$  170.8 (C), 136.7 (C), 134.0 (C), 129.3 (2 CH), 128.7 (2 CH), 79.1 (CH<sub>2</sub>), 52.1 (CH<sub>3</sub>), 39.5 (CH), 37.4 (CH<sub>2</sub>);<sup>6</sup> MS (*m/z*, relative intensity): 259 (M<sup>+</sup>+2, 0.3), 257 (M<sup>+</sup>, 0.8), 226 (8), 212 (30), 211 (15), 210 (100), 179 (18), 169 (43), 152 (96), 151 (64), 138 (54), 115 (45); exact mass calculated for C<sub>11</sub>H<sub>12</sub>O<sub>4</sub>NCl (M<sup>+</sup>): 257.0455; found: 257.0457.

<sup>5</sup> Lit. [ $\alpha$ ]<sub>D</sub><sup>20</sup> –13.2 (*c* 0.5, CH<sub>2</sub>Cl<sub>2</sub>), Jensen, K. L.; Poulsen, P. H.; Donslund, B. S.; Morana, F.; Jørgensen, K. A. *Org. Lett.* **2012**, *14*, 1516 – 1519.

<sup>6</sup> (a) Jensen, K. L.; Poulsen, P. H.; Donslund, B. S.; Morana, F.; Jørgensen, K. A. *Org. Lett.* **2012**, *14*, 1516 – 1519. (b) Vesely, J.; Zhao, G.-L.; Bartoszewicz, A.; Cordova, A. *Tetrahedron Lett.* **2008**, *49*, 4209 – 4212. (c) Palomo, C.; Landa, A.; Mielgo, A.; Oiarbide, M.; Puente, A.; Vera, S. *Angew. Chem. Int. Ed.* **2007**, *46*, 8431 – 8435.



### Preparation of (*S*)-methyl 3-(4-bromophenyl)-4-nitrobutanoate (**2d**)

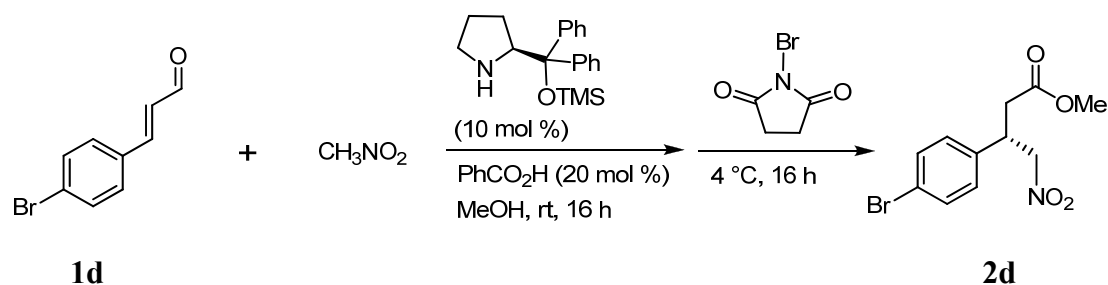

To a solution of (*E*)-3-(4-bromophenyl)acrylaldehyde **1d** (253.3 mg, 1.2 mmol), (*S*)-2-(diphenyl(trimethylsilyloxy)methyl)pyrrolidine (39.1 mg, 0.12 mmol, 0.1 equiv) and benzoic acid (29.3 mg, 0.24 mmol, 0.2 equiv) in methanol (2.4 mL) was added nitromethane (219.7 mg, 3.6 mmol, 3.0 equiv) at ambient temperature. The resulting solution was stirred at room temperature for 16 h until the completion of the reaction, as monitored by TLC. The reaction temperature was then reduced to 4 °C, followed by the addition of *N*-bromosuccinimide (640.7 mg, 3.6 mmol, 3.0 equiv) to the reaction mixture. The resulting solution was vigorously stirred at 4 °C for 16 h until the completion of the reaction, as monitored by TLC. The reaction mixture was flushed through a small silica gel column with 20% EtOAc–hexane and concentrated *in vacuo* to give the orange oil residue. The crude product was purified by flash column chromatography with 7:14:79 EtOAc–CH<sub>2</sub>Cl<sub>2</sub>–hexane (*R<sub>f</sub>* = 0.26) to afford the product **2d** (217.5 mg, 60% yield) as a pale yellow oil. Selected spectroscopic data of **2d**:  $[\alpha]_{\text{D}}^{26} -12.0$  (*c* 0.4, CH<sub>2</sub>Cl<sub>2</sub>);<sup>7</sup> IR (neat): 2953, 2922, 1733, 1552, 1490, 1436, 1375, 1265, 1200, 1168, 1109, 1075, 1010, 824, 727 cm<sup>-1</sup>; <sup>1</sup>H NMR (400 MHz, CDCl<sub>3</sub>): δ 7.45 (d, *J* = 8.5 Hz, 2H), 7.09 (d, *J* = 8.5 Hz, 2H), 4.70 (dd, *J* = 12.7, 6.8 Hz, 1H), 4.59 (dd, *J* = 12.7, 8.0 Hz, 1H), 3.98 – 3.90 (m, 1H), 3.62 (s, 3H), 2.78 – 2.67 (m, 2H); <sup>13</sup>C NMR (100 MHz, CDCl<sub>3</sub>): δ 170.8 (C), 137.2 (C), 132.3 (2 CH), 129.0 (2 CH), 122.1 (C), 79.0 (CH<sub>2</sub>), 52.1 (CH<sub>3</sub>), 39.6 (CH), 37.3 (CH<sub>2</sub>);<sup>8</sup> MS (*m/z*, relative intensity): 303 (*M*<sup>+</sup>+3, 1), 301 (*M*<sup>+</sup>+1, 1), 272 (5), 270 (5), 256 (94), 254 (100), 225 (16), 223 (13), 215 (27), 213 (29), 198 (63), 196 (70), 184 (28), 182 (29), 116 (79), 115 (36); exact mass calculated for C<sub>11</sub>H<sub>12</sub>O<sub>4</sub>NBr (*M*<sup>+</sup>): 300.9950; found: 300.9951.

<sup>7</sup> Lit.  $[\alpha]_{\text{D}}^{20} -12.2$  (*c* 0.5, CH<sub>2</sub>Cl<sub>2</sub>), Jensen, K. L.; Poulsen, P. H.; Donslund, B. S.; Morana, F.; Jørgensen, K. A. *Org. Lett.* **2012**, *14*, 1516 – 1519.

<sup>8</sup> Jensen, K. L.; Poulsen, P. H.; Donslund, B. S.; Morana, F.; Jørgensen, K. A. *Org. Lett.* **2012**, *14*, 1516 – 1519.

### Preparation of (*S*)-methyl 4-nitro-3-*p*-tolylbutanoate (**2e**)

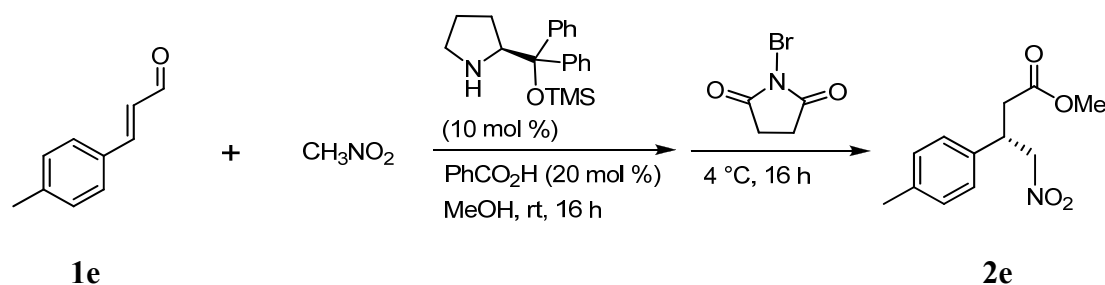

To a solution of (*E*)-3-*p*-tolylacrylaldehyde (**1e**, 146.2 mg, 1.0 mmol), (*S*)-2-(diphenyl(trimethylsilyloxy)methyl)pyrrolidine (32.6 mg, 0.1 mmol, 0.1 equiv) and benzoic acid (24.4 mg, 0.2 mmol, 0.2 equiv) in methanol (2 mL) was added nitromethane (183.1 mg, 3.0 mmol, 3.0 equiv) at ambient temperature. The resulting solution was stirred at room temperature for 16 h until the completion of the reaction, as monitored by TLC. The reaction temperature was then reduced to 4 °C, followed by the addition of *N*-bromosuccinimide (534.0 mg, 3.0 mmol, 3.0 equiv) to the reaction mixture. The resulting solution was vigorously stirred at 4 °C for 16 h until the completion of the reaction, as monitored by TLC. The reaction mixture was flushed through a small silica gel column with 20% EtOAc–hexane and concentrated *in vacuo* to give the orange oil residue. The crude product was purified by flash column chromatography with 5:10:85 EtOAc–CH<sub>2</sub>Cl<sub>2</sub>–hexane (*R<sub>f</sub>* = 0.20) to afford the product **2e** (125.7 mg, 53% yield) as a yellow oil. Selected spectroscopic data of **2e**:  $[\alpha]_{\text{D}}^{26} -17.0$  (c 0.4, CH<sub>2</sub>Cl<sub>2</sub>);<sup>9</sup> IR (neat): 2953, 2923, 1735, 1554, 1515, 1436, 1377, 1198, 1168, 1115, 996, 879, 817, 719 cm<sup>-1</sup>; <sup>1</sup>H NMR (400 MHz, CDCl<sub>3</sub>):  $\delta$  7.17 – 7.00 (m, 4 H), 4.69 (dd, *J* = 12.5, 7.5 Hz, 1 H), 4.59 (dd, *J* = 12.5, 7.5 Hz, 1 H), 3.96 – 3.89 (m, 1 H), 3.61 (s, 3 H), 2.79 – 2.67 (m, 2 H), 2.30 (s, 3 H); <sup>13</sup>C NMR (100 MHz, CDCl<sub>3</sub>):  $\delta$  171.1 (C), 137.8 (C), 135.2 (C), 129.8 (2 CH), 127.1 (2 CH), 79.5 (CH<sub>2</sub>), 51.9 (CH<sub>3</sub>), 39.8 (CH), 37.6 (CH<sub>2</sub>), 21.0 (CH<sub>3</sub>);<sup>10</sup> MS (*m/z*, relative intensity): 237 (M<sup>+</sup>, 1), 206 (7), 191 (13), 190 (100), 159 (15), 149 (24), 132 (82), 131 (75), 118 (32), 117 (29), 115 (19), 91 (16); exact mass calculated for C<sub>12</sub>H<sub>15</sub>O<sub>4</sub>N (M<sup>+</sup>): 237.1001; found: 237.1001.

<sup>9</sup> Lit.  $[\alpha]_{\text{D}}^{20} -17.3$  (c 0.5, CH<sub>2</sub>Cl<sub>2</sub>), Jensen, K. L.; Poulsen, P. H.; Donslund, B. S.; Morana, F.; Jørgensen, K. A. *Org. Lett.* **2012**, *14*, 1516 – 1519.

<sup>10</sup> Jensen, K. L.; Poulsen, P. H.; Donslund, B. S.; Morana, F.; Jørgensen, K. A. *Org. Lett.* **2012**, *14*, 1516 – 1519.

### Preparation of (*S*)-methyl 3-(2-bromophenyl)-4-nitrobutanoate (**2f**)

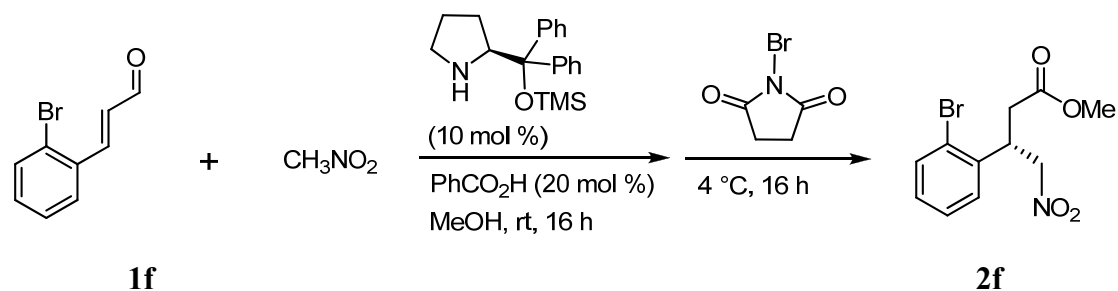

To a solution of (*E*)-3-(2-bromophenyl)acrylaldehyde (**1f**, 211.1 mg, 1.0 mmol), (*S*)-2-(diphenyl(trimethylsilyloxy)methyl)pyrrolidine (32.6 mg, 0.1 mmol, 0.1 equiv) and benzoic acid (24.4 mg, 0.2 mmol, 0.2 equiv) in methanol (2 mL) was added nitromethane (183.1 mg, 3.0 mmol, 3.0 equiv) at ambient temperature. The resulting solution was stirred at room temperature for 16 h until the completion of the reaction, as monitored by TLC. The reaction temperature was then reduced to 4 °C, followed by the addition of *N*-bromosuccinimide (534.0 mg, 3.0 mmol, 3.0 equiv) to the reaction mixture. The resulting solution was vigorously stirred at 4 °C for 16 h until the completion of the reaction, as monitored by TLC. The reaction mixture was flushed through a small silica gel column with 20% EtOAc–hexane and concentrated *in vacuo* to give the orange oil residue. The crude product was purified by flash column chromatography with 7:14:79 EtOAc–CH<sub>2</sub>Cl<sub>2</sub>–hexane (*R<sub>f</sub>* = 0.26) to afford the product **2f** (175.2 mg, 58% yield) as a pale yellow oil.<sup>11</sup> Selected spectroscopic data of **2f**:  $[\alpha]_{\text{D}}^{26} -14.3$  (*c* 0.4, CH<sub>2</sub>Cl<sub>2</sub>); IR (neat): 2953, 2915, 1736, 1554, 1473, 1436, 1377, 1200, 1173, 1022, 758, 731 cm<sup>-1</sup>; <sup>1</sup>H NMR (400 MHz, CDCl<sub>3</sub>):  $\delta$  7.59 (dd, *J* = 8.0, 1.3 Hz, 1 H), 7.30 – 7.26 (m, 1 H), 7.20 – 7.11 (m, 2 H), 4.80 – 4.71 (m, 2 H), 4.50 – 4.43 (m, 1 H), 3.63 (s, 3 H), 2.91 – 2.80 (m, 2 H); <sup>13</sup>C NMR (100 MHz, CDCl<sub>3</sub>):  $\delta$  170.9 (C), 137.1 (C), 133.8 (CH), 129.4 (CH), 128.0 (CH), 127.8 (CH), 124.5 (C), 77.5 (CH<sub>2</sub>), 52.0 (CH<sub>3</sub>), 38.9 (CH), 36.0 (CH<sub>2</sub>); MS (*m/z*, relative intensity): 303 (M<sup>+</sup>+3, 0.1), 301 (M<sup>+</sup>+1, 0.1), 272 (2), 270 (2), 223 (20), 222 (100), 215 (11), 213 (12), 184 (12), 182 (12), 175 (53), 161 (91), 116 (90), 115 (68); exact mass calculated for C<sub>11</sub>H<sub>12</sub>O<sub>4</sub>NBr (M<sup>+</sup>): 300.9950; found: 300.9947.

<sup>11</sup> The racemic **2f** was prepared from 3-bromobenzaldehyde by the Wittig reaction followed by the Michael addition of nitromethane and applied in the synthesis of novel piperidine inhibitors of farnesyltransferase. However, no details of physical characteristics and spectra data were reported, see: (a) Nara, S.; Tanaka, R.; Eishima, J.; Hara, M.; Takahashi, Y.; Otaki, S.; Foglesong, R. J.; Hughes, P. F.; Turkington, S.; Kanda, Y. *J. Med. Chem.* **2003**, *46*, 2467 – 2473. (b) Tanaka, R.; Rubio, A.; Harn, N. K.; Gernert, D.; Grese, T. A.; Eishima, J.; Hara, M.; Yoda, Nobuyuki; Ohashi, R.; Kuwabara, T.; Soga, S.; Akinaga, S.; Nara, S.; Kanda, Y. *Bioorg. Med. Chem.* **2007**, *15*, 1363 – 1382.

### Preparation of (S)-methyl 3-(2-chloro-6-methylphenyl)-4-nitrobutanoate (**2g**)

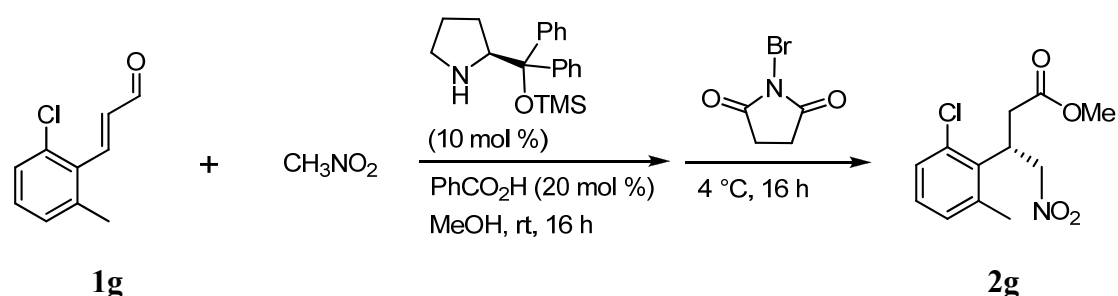

To a solution of (*E*)-3-(2-chloro-6-methylphenyl)acrylaldehyde (**1g**, 100.0 mg, 0.55 mmol), (*S*)-2-(diphenyl(trimethylsilyloxy)methyl)pyrrolidine (19.5 mg, 0.06 mmol, 0.1 equiv) and benzoic acid (14.7 mg, 0.12 mmol, 0.2 equiv) in methanol (2 mL) was added nitromethane (109.9 mg, 1.8 mmol, 3.0 equiv) at ambient temperature. The resulting solution was stirred at room temperature for 16 h until the completion of the reaction, as monitored by TLC. The reaction temperature was then reduced to 4 °C, followed by the addition of *N*-bromosuccinimide (320.4 mg, 1.8 mmol, 3.0 equiv) to the reaction mixture. The resulting solution was vigorously stirred at 4 °C for 16 h until the completion of the reaction, as monitored by TLC. The reaction mixture was flushed through a small silica gel column with 20% EtOAc–hexane and concentrated *in vacuo* to give the orange oil residue. The crude product was purified by flash column chromatography with 5:10:85 EtOAc–CH<sub>2</sub>Cl<sub>2</sub>–hexane ( $R_f = 0.37$ ) to afford the product **2g** (89.9 mg, 60% yield) as a pale yellow oil. Selected spectroscopic data of **2g**:  $[\alpha]_D^{26} -15.8$  ( $c$  0.4, CH<sub>2</sub>Cl<sub>2</sub>); IR (neat): 2954, 2917, 1736, 1554, 1435, 1377, 1217, 1194, 1173, 1124, 1090, 1048, 1001, 845, 776 cm<sup>-1</sup>; <sup>1</sup>H NMR (400 MHz, CDCl<sub>3</sub>):  $\delta$  7.21 – 7.14 (m, 1 H), 7.13 – 7.05 (m, 2 H), 5.02 (dd,  $J = 13.1, 8.0$  Hz, 1 H), 4.89 (dd,  $J = 13.1, 6.7$  Hz, 1 H), 4.62 – 4.54 (m, 1 H), 3.62 (s, 3 H), 3.10 – 2.96 (m, 2 H), 2.50 (s, 3 H); <sup>13</sup>C NMR (100 MHz, CDCl<sub>3</sub>):  $\delta$  171.6 (C), 140.3 (C), 134.0 (C), 133.4 (C), 129.9 (CH), 129.3 (CH), 128.8 (CH), 76.9 (CH<sub>2</sub>), 52.0 (CH<sub>3</sub>), 35.2 (CH), 35.1 (CH<sub>2</sub>), 21.2 (CH<sub>3</sub>); MS ( $m/z$ , relative intensity): 273 ( $M^{+2}$ , 0.26), 271 ( $M^+$ , 0.61), 240 (14), 236 (61), 209 (23), 189 (35), 175 (46), 167 (100), 165 (82), 129 (57), 115 (100); exact mass calculated for C<sub>12</sub>H<sub>14</sub>O<sub>4</sub>NCl ( $M^+$ ): 271.0611; found: 271.0612.

### Preparation of (*S*)-methyl 3-(4-methoxyphenyl)-4-nitrobutanoate (**2h**)

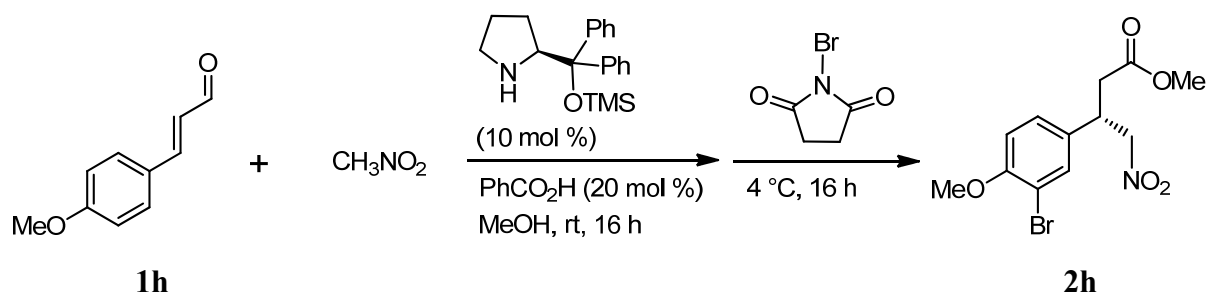

To a solution of (*E*)-3-(4-methoxyphenyl)acrylaldehyde (**1h**, 97.3 mg, 0.6 mmol), (*S*)-2-(diphenyl(trimethylsilyloxy)methyl)pyrrolidine (19.5 mg, 0.06 mmol, 0.1 equiv) and benzoic acid (14.7 mg, 0.12 mmol, 0.2 equiv) in methanol (1.2 mL) was added nitromethane (109.9 mg, 1.8 mmol, 3.0 equiv) at ambient temperature. The resulting solution was stirred at room temperature for 16 h until the completion of the reaction, as monitored by TLC. The reaction temperature was then reduced to 4 °C, followed by the addition of *N*-bromosuccinimide (320.4 mg, 1.8 mmol, 3.0 equiv) to the reaction mixture. The resulting solution was vigorously stirred at 4 °C for 16 h until the completion of the reaction, as monitored by TLC. The reaction mixture was flushed through a small silica gel column with 20% EtOAc–hexane and concentrated *in vacuo* to give the orange oil residue. The crude product was purified by flash column chromatography with 7:14:79 EtOAc–CH<sub>2</sub>Cl<sub>2</sub>–hexane (*R<sub>f</sub>* = 0.26) to afford the product **2h** (113.6 mg, 57% yield) as a pale yellow oil.<sup>12</sup> Selected spectroscopic data of **2h**: m.p. 100–101 °C; [ $\alpha$ ]<sub>D</sub><sup>26</sup> –13.3 (c 0.4, CH<sub>2</sub>Cl<sub>2</sub>); IR (neat): 2951, 2841, 1732, 1552, 1498, 1436, 1375, 1286, 1259, 1168, 1054, 1017, 881, 814, 718 cm<sup>-1</sup>; <sup>1</sup>H NMR (400 MHz, CDCl<sub>3</sub>):  $\delta$  7.38 (d, *J* = 2.3 Hz, 1 H), 7.13 (dd, *J* = 8.5, 2.3 Hz, 1 H), 6.83 (d, *J* = 8.5 Hz, 1 H), 4.68 (dd, *J* = 12.6, 6.8 Hz, 1 H), 4.57 (dd, *J* = 12.6, 8.0 Hz, 1 H), 3.93 – 3.85 (m, 1 H), 3.85 (s, 3 H), 3.63 (s, 3 H), 2.75 – 2.70 (m, 2 H); <sup>13</sup>C NMR (100 MHz, CDCl<sub>3</sub>):  $\delta$  170.9 (C), 155.6 (C), 132.0 (CH), 131.7 (C), 127.6 (CH), 112.18 (CH), 112.17 (C), 79.3 (CH<sub>2</sub>), 56.2 (CH<sub>3</sub>), 52.0 (CH<sub>3</sub>), 39.1 (CH), 37.5 (CH<sub>2</sub>);<sup>13</sup> MS (*m/z*, relative intensity): 333 (M<sup>+</sup>+2, 9), 331 (M<sup>+</sup>, 9), 286 (94), 284 (95), 228 (51), 226 (52), 214 (33), 212 (34), 147 (28), 146 (100); exact mass calculated for C<sub>12</sub>H<sub>14</sub>BrNO<sub>5</sub> (M<sup>+</sup>): 331.0055; found: 331.0050.

<sup>12</sup> Racemic **2h** was prepared for the synthesis of the antidepressant rolipram, see: Schmidt, B.; Elizarov, N.; Berger, R.; Petersen, M. H. *Synthesis* **2013**, *45*, 1174–1180.

<sup>13</sup> The chemical shift of <sup>13</sup>C NMR spectra is consistent with the theoretical calculation by SPARTAN<sup>14</sup>, equilibrium geometry, density function model, MMFF, EDF2/6-31G:  $\delta$  172.7, 156.0, 135.8, 131.3, 124.3, 110.8, 110.6, 78.8, 54.4, 52.2, 38.5, 35.4. An error ( $\delta$  144.2) was reported in the aforementioned literature:  $\delta$  171.0, 155.8, 144.2, 132.2, 131.9, 127.8, 112.4, 79.5, 56.4, 52.2, 39.3, 37.7

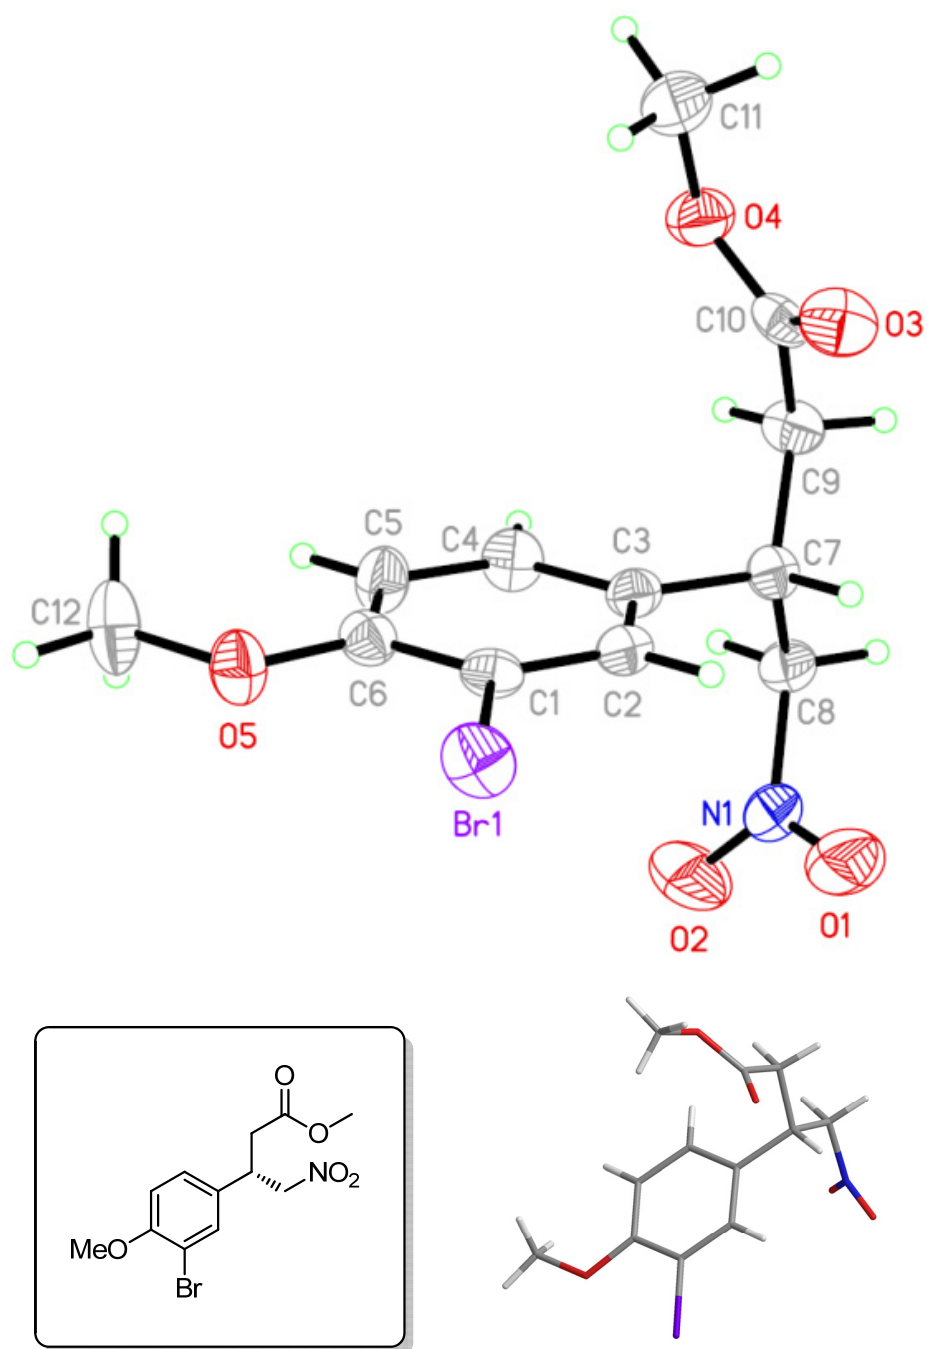

**Figure S1.** ORTEP and Stereo plots for X-ray crystal structures of (-)-**2h**. CCDC-1420364 contains the supplementary crystallographic data for (-)-**2h**. These data can be obtained free of charge from the Cambridge Crystallographic Data Centre via [www.ccdc.cam.ac.uk/data\\_request/cif](http://www.ccdc.cam.ac.uk/data_request/cif).

### Preparation of (*S*)-methyl 3-(3-bromo-6-fluoro-2-methoxyphenyl)-4-nitrobutanoate (**2i**)

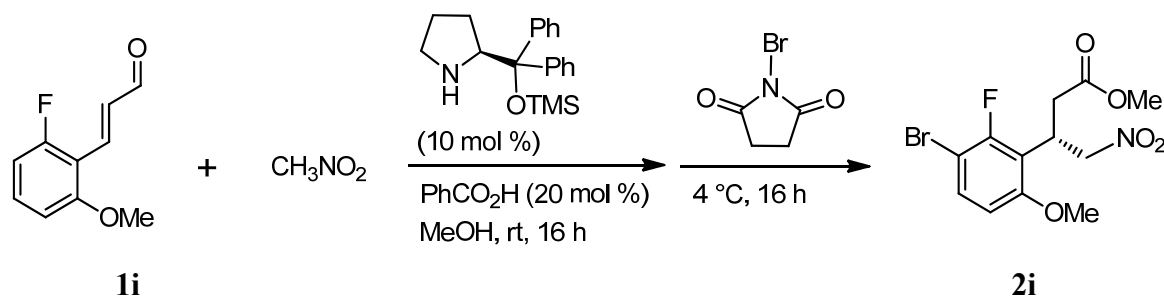

To a solution of (*E*)-3-(2-fluoro-6-methoxyphenyl)acrylaldehyde (**1i**, 180.2 mg, 1.0 mmol), (*S*)-2-(diphenyl(trimethylsilyloxy)methyl)pyrrolidine (32.6 mg, 0.1 mmol, 0.1 equiv) and benzoic acid (24.4 mg, 0.2 mmol, 0.2 equiv) in methanol (2 mL) was added nitromethane (183.1 mg, 3.0 mmol, 3.0 equiv) at ambient temperature. The resulting solution was stirred at room temperature for 16 h until the completion of the reaction, as monitored by TLC. The reaction temperature was then reduced to 4 °C, followed by the addition of *N*-bromosuccinimide (534 mg, 3.0 mmol, 3.0 equiv) to the reaction mixture. The resulting solution was vigorously stirred at 4 °C for 16 h until the completion of the reaction, as monitored by TLC. The reaction mixture was flushed through a small silica gel column with 20% EtOAc–hexane and concentrated *in vacuo* to give the orange oil residue. The crude product was purified by flash column chromatography with 5:10:85 EtOAc–CH<sub>2</sub>Cl<sub>2</sub>–hexane ( $R_f = 0.14$ ) to afford the product **2i** (203.1 mg, 58% yield) as a pale yellow oil. Selected spectroscopic data of **2i**:  $[\alpha]_{\text{D}}^{26} -11.2$  ( $c$  0.3, CH<sub>2</sub>Cl<sub>2</sub>); IR (neat): 2951, 2844, 1738, 1603, 1554, 1478, 1439, 1377, 1282, 1219, 1175, 1088, 998, 881, 803 cm<sup>-1</sup>; <sup>1</sup>H NMR (400 MHz, acetone-*d*<sub>6</sub>)  $\delta$  7.53 (dd,  $J = 8.5, 8.5$  Hz, 1 H), 6.88 (d,  $J = 8.5$  Hz, 1 H), 5.05 – 4.90 (m, 2 H), 4.57 – 4.47 (m, 1 H), 3.94 (s, 3 H), 3.58 (s, 3 H), 2.91 (d,  $J = 7.5$  Hz, 2 H); <sup>13</sup>C NMR (100 MHz, acetone-*d*<sub>6</sub>):  $\delta$  171.8 (C), 159.4 (d,  $J = 4$  Hz, C), 158.2 (d,  $J = 241$  Hz, C), 133.3 (d,  $J = 2$  Hz, CH), 117.0 (d,  $J = 17$  Hz, C), 109.8 (d,  $J = 4$  Hz, CH), 100.4 (d,  $J = 23$  Hz, C), 77.5 (d,  $J = 2$  Hz, CH<sub>2</sub>), 56.8 (CH<sub>3</sub>), 51.9 (CH<sub>3</sub>), 35.4 (d,  $J = 1$  Hz, CH<sub>2</sub>), 32.0 (d,  $J = 3$  Hz, CH); MS ( $m/z$ , relative intensity): 351 ( $M^+ + 2$ , 20), 349 ( $M^+$ , 20), 304 (17), 302 (17), 273 (32), 271 (32), 245 (36), 243 (38), 230 (34), 229 (35), 164 (76), 150 (54), 149 (66), 136 (100); exact mass calculated for C<sub>12</sub>H<sub>13</sub>O<sub>5</sub>NBrF ( $M^+$ ): 348.9961; found: 348.9958.

**Preparation of (3*S*,4*S*)-methyl 4-nitro-7-oxo-3-phenylheptanoate (*syn*-**3a**) and (3*S*,4*R*)-methyl 4-nitro-7-oxo-3-phenylheptanoate (*anti*-**3a**)**

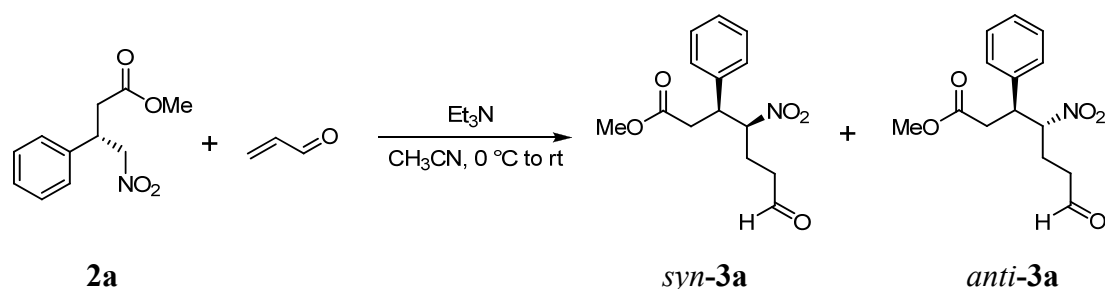

To a solution of **2a** (22.3 mg, 0.1 mmol) and Et<sub>3</sub>N (10.1 mg, 0.1 mmol, 1 equiv) in CH<sub>3</sub>CN (0.9 mL) was added a solution of acrylaldehyde (11.2 mg, 0.2 mmol, 2.0 equiv) in CH<sub>3</sub>CN (0.1 mL) at 0 °C. The resulting solution was stirred at room temperature for 18 h until the completion of the reaction, as monitored by TLC. The reaction solution was concentrated *in vacuo* to give the yellow oil residue. The crude product was purified by flash column chromatography with 15% EtOAc–hexane (*R<sub>f</sub>* = 0.33 for *syn*-**3a**, *R<sub>f</sub>* = 0.17 for *anti*-**3a**, in 25% EtOAc–hexane) to afford the product *syn*-**3a** (16.5 mg, 59% yield) and *anti*-**3a** (6.4 mg, 23% yield) as colorless oils.

Selected spectroscopic data of *syn*-**3a**: [ $\alpha$ ]<sub>D</sub><sup>28</sup> –4.6 (*c* 0.5, CH<sub>2</sub>Cl<sub>2</sub>); IR (neat): 2953, 2849, 1736, 1548, 1495, 1437, 1367, 1258, 1166, 1089, 851, 770, 702 cm<sup>-1</sup>; <sup>1</sup>H NMR (400 MHz, CDCl<sub>3</sub>):  $\delta$  9.62 (s, 1 H), 7.37 – 7.25 (m, 3 H), 7.22 – 7.17 (m, 2 H), 4.82 – 4.75 (m, 1 H), 3.69 – 3.63 (m, 1 H), 3.50 (m, 3 H), 2.75 (dd, *J* = 15.8, 10.1 Hz, 1 H), 2.62 (dd, *J* = 15.8, 4.4 Hz, 1 H), 2.49 – 2.33 (m, 2 H), 2.03 – 1.93 (m, 1 H), 1.89 – 1.81 (m, 1 H); <sup>13</sup>C NMR (100 MHz, CDCl<sub>3</sub>):  $\delta$  199.2 (CH), 170.7 (C), 137.2 (C), 129.2 (2 CH), 128.2 (CH), 128.1 (2 CH), 91.1 (CH), 51.8 (CH<sub>3</sub>), 45.7 (CH), 39.6 (CH<sub>2</sub>), 37.7 (CH<sub>2</sub>), 24.3 (CH<sub>2</sub>); MS (*m/z*, relative intensity): 279 (M<sup>+</sup>, 1), 248 (5), 233 (7), 215 (10), 204 (17), 201 (50), 173 (18), 159 (26), 155 (23), 129 (100), 121 (54); exact mass calculated for C<sub>14</sub>H<sub>17</sub>O<sub>5</sub>N (M<sup>+</sup>): 279.1107; found: 279.1107.

Selected spectroscopic data of *anti*-**3a**: [ $\alpha$ ]<sub>D</sub><sup>28</sup> 1.6 (*c* 0.5, CH<sub>2</sub>Cl<sub>2</sub>); <sup>1</sup>H NMR (400 MHz, CDCl<sub>3</sub>):  $\delta$  9.73 (s, 1 H), 7.31 – 7.24 (m, 3 H), 7.16 – 7.12 (m, 2 H), 4.87 – 4.81 (m, 1 H), 3.71 – 3.66 (m, 1 H), 3.58 (s, 3 H), 2.91 (dd, *J* = 16.3, 6.1 Hz, 1 H), 2.76 (dd, *J* = 16.3, 8.5 Hz, 1 H), 2.62 – 2.45 (m, 2 H), 2.28 – 2.08 (m, 2 H); <sup>13</sup>C NMR (100 MHz, CDCl<sub>3</sub>):  $\delta$  199.5 (CH), 171.3 (C), 137.4 (C), 128.8 (2 CH), 128.2 (CH), 127.9 (2 CH), 90.7 (CH), 52.0 (CH<sub>3</sub>), 45.2 (CH), 39.8 (CH<sub>2</sub>), 36.5 (CH<sub>2</sub>), 23.5 (CH<sub>2</sub>).



**Preparation of (3*S*,4*S*)-methyl 3-(4-fluorophenyl)-4-nitro-7-oxoheptanoate (*syn*-**3b**) and (3*S*,4*R*)-methyl 3-(4-fluorophenyl)-4-nitro-7-oxoheptanoate (*anti*-**3b**)**

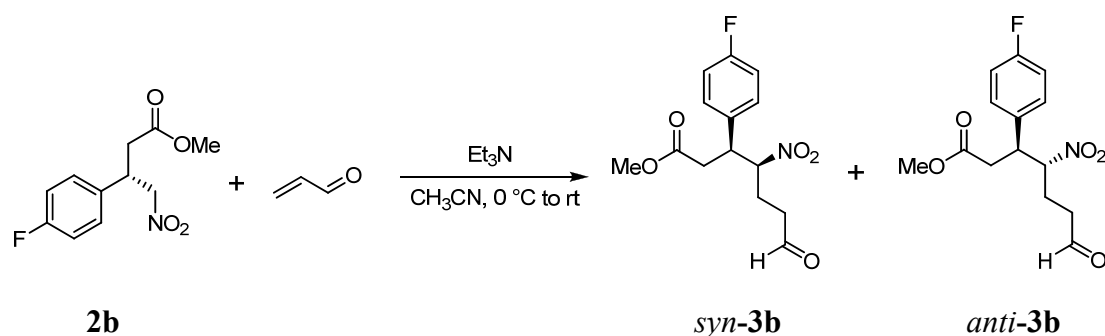

To a solution of **2b** (48.2 mg, 0.2 mmol) and Et<sub>3</sub>N (20.2 mg, 0.2 mmol, 1 equiv) in CH<sub>3</sub>CN (1.8 mL) was added a solution of acrylaldehyde (22.4 mg, 0.4 mmol, 2.0 equiv) in CH<sub>3</sub>CN (0.2 mL) at 0 °C. The resulting solution was stirred at room temperature for 24 h until the completion of the reaction, as monitored by TLC. The reaction solution was concentrated *in vacuo* to give the yellow oil residue. The crude product was purified by flash column chromatography with 15% EtOAc–hexane ( $R_f = 0.29$  for *syn*-**3b**,  $R_f = 0.11$  for *anti*-**3b**, in 25% EtOAc–hexane) to afford the product *syn*-**3b** (36.3 mg, 61% yield) and *anti*-**3b** (14.9 mg, 25% yield) as colorless oils.

Selected spectroscopic data of *syn*-**3b**:  $[\alpha]_D^{28} -3.0$  ( $c$  0.5, CH<sub>2</sub>Cl<sub>2</sub>); IR (neat): 2954, 2848, 1736, 1605, 1549, 1511, 1437, 1364, 1226, 1163, 1103, 1015, 840, 773 cm<sup>-1</sup>; <sup>1</sup>H NMR (400 MHz, CDCl<sub>3</sub>):  $\delta$  9.64 (s, 1 H), 7.21 – 7.16 (m, 2 H), 7.03 (dd,  $J = 8.5, 8.5$  Hz, 2 H), 4.79 – 4.73 (m, 1 H), 3.69 – 3.62 (m, 1 H), 3.51 (s, 3 H), 2.71 (dd,  $J = 15.9, 10.1$  Hz, 1 H), 2.61 (dd,  $J = 15.9, 4.6$  Hz, 1 H), 2.51 – 2.36 (m, 2 H), 2.00 – 1.91 (m, 1 H), 1.89 – 1.80 (m, 1 H); <sup>13</sup>C NMR (100 MHz, CDCl<sub>3</sub>):  $\delta$  199.2 (CH), 170.6 (C), 162.4 (d,  $J = 245$  Hz, C), 133.0 (d,  $J = 3$  Hz, C), 129.8 (d,  $J = 9$  Hz, 2 CH), 116.2 (d,  $J = 22$  Hz, 2 CH), 90.9 (CH), 51.86 (CH<sub>3</sub>), 45.0 (CH), 39.5 (CH<sub>2</sub>), 37.7 (CH<sub>2</sub>), 24.2 (CH<sub>2</sub>); MS ( $m/z$ , relative intensity): 297 (M<sup>+</sup>, 1), 266 (3), 251 (5), 233 (8), 222 (12), 219 (31), 194 (16), 191 (16), 177 (26), 173 (18), 149 (41), 147 (100), 139 (85), 122 (52), 109 (79); exact mass calculated for C<sub>14</sub>H<sub>16</sub>O<sub>5</sub>NF (M<sup>+</sup>): 297.1013; found: 297.1015.

Selected spectroscopic data of *anti*-**3b**:  $[\alpha]_D^{28} 2.9$  ( $c$  0.2, CH<sub>2</sub>Cl<sub>2</sub>); <sup>1</sup>H NMR (400 MHz, CDCl<sub>3</sub>):  $\delta$  9.74 (s, 1 H), 7.12 (dd,  $J = 8.5, 5.2$  Hz, 2 H), 6.97 (dd,  $J = 8.5, 8.5$  Hz, 2 H), 4.83 – 4.78 (m, 1 H), 3.70 – 3.63 (m, 1 H), 3.58 (s, 3 H), 2.89 (dd,  $J = 16.3, 5.8$  Hz, 1 H), 2.72 (dd,  $J = 16.2, 8.8$  Hz, 1 H), 2.62 – 2.46 (m, 2 H), 2.28 – 2.20 (m, 1 H), 2.16 – 2.06 (m, 1 H); <sup>13</sup>C NMR (100 MHz, CDCl<sub>3</sub>):  $\delta$  199.4 (CH), 171.1 (C), 162.4 (d,  $J = 245$  Hz, C), 133.1 (d,  $J = 3$  Hz, C), 129.6 (d,  $J = 8$  Hz, 2 CH), 115.8 (d,  $J = 21$  Hz, 2 CH), 90.7 (CH), 52.0 (CH<sub>3</sub>), 44.5 (CH), 39.7 (CH<sub>2</sub>), 36.6 (CH<sub>2</sub>), 23.6 (CH<sub>2</sub>).

**Preparation of (3*S*,4*S*)-methyl 3-(4-chlorophenyl)-4-nitro-7-oxoheptanoate (*syn*-**3c**) and (3*S*,4*R*)-methyl 3-(4-chlorophenyl)-4-nitro-7-oxoheptanoate (*anti*-**3c**)**

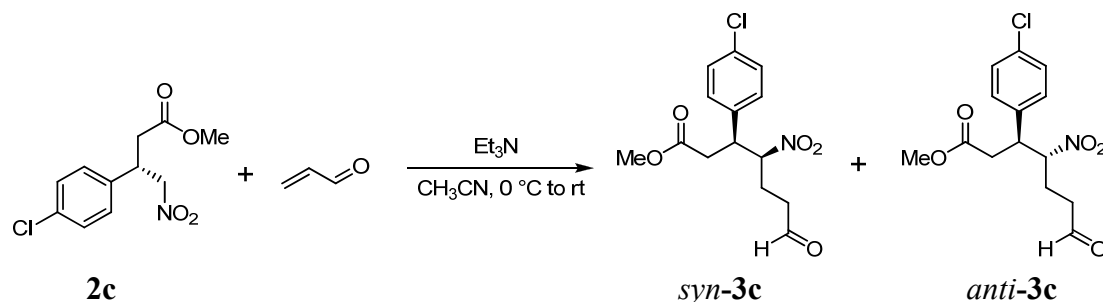

To a solution of **2c** (51.5 mg, 0.2 mmol) and Et<sub>3</sub>N (20.2 mg, 0.2 mmol, 1 equiv) in CH<sub>3</sub>CN (1.8 mL) was added a solution of acrylaldehyde (22.4 mg, 0.4 mmol, 2.0 equiv) in CH<sub>3</sub>CN (0.2 mL) at 0 °C. The resulting solution was stirred at room temperature for 22 h until the completion of the reaction, as monitored by TLC. The reaction solution was concentrated *in vacuo* to give the yellow oil residue. The crude product was purified by flash column chromatography with 15% EtOAc–hexane (*R<sub>f</sub>* = 0.35 for *syn*-**3c**, *R<sub>f</sub>* = 0.16 for *anti*-**3c**, in 25% EtOAc–hexane) to afford the product *syn*-**3c** (33.9 mg, 54% yield) and *anti*-**3c** (18.8 mg, 30% yield) as colorless oils.

Selected spectroscopic data of *syn*-**3c**:  $[\alpha]_{\text{D}}^{28}$  -8.5 (*c* 0.5, CH<sub>2</sub>Cl<sub>2</sub>); IR (neat): 2953, 2844, 1735, 1549, 1493, 1437, 1415, 1362, 1235, 1167, 1093, 1014, 833, 728 cm<sup>-1</sup>; <sup>1</sup>H NMR (400 MHz, CDCl<sub>3</sub>): δ 9.63 (s, 1 H), 7.31 (d, *J* = 8.5 Hz, 2 H), 7.15 (*J* = 8.5 Hz, 2 H), 4.79 – 4.72 (m, 1 H), 3.67 – 3.61 (m, 1 H), 3.50 (s, 3 H), 2.71 (dd, *J* = 16.0, 10.2 Hz, 1 H), 2.61 (dd, *J* = 16.0, 4.5 Hz, 1 H), 2.50 – 2.35 (m, 2 H), 1.99 – 1.90 (m, 1 H), 1.87 – 1.79 (m, 1 H); <sup>13</sup>C NMR (100 MHz, CDCl<sub>3</sub>): δ 199.2 (CH), 170.5 (C), 135.6 (C), 134.1 (C), 129.5 (2 CH), 129.4 (2 CH), 90.7 (CH), 51.9 (CH<sub>3</sub>), 45.0 (CH), 39.4 (CH<sub>2</sub>), 37.4 (CH<sub>2</sub>), 24.2 (CH<sub>2</sub>); MS (*m/z*, relative intensity): 315 (M<sup>+</sup>+2, 0.1), 313 (M<sup>+</sup>, 0.2), 282 (6), 267 (16), 235 (55), 210 (25), 207 (24), 193 (43), 165 (70), 163 (94), 155 (100); exact mass calculated for C<sub>14</sub>H<sub>16</sub>O<sub>5</sub>NCl (M<sup>+</sup>): 313.0717; found: 313.0719.

Selected spectroscopic data of *anti*-**3c**:  $[\alpha]_{\text{D}}^{28}$  13.4 (*c* 0.25, CH<sub>2</sub>Cl<sub>2</sub>); <sup>1</sup>H NMR (400 MHz, CDCl<sub>3</sub>): δ 9.74 (s, 1 H), 7.25 (d, *J* = 8.5 Hz, 2 H), 7.08 (*J* = 8.5 Hz, 2 H), 4.83 – 4.78 (m, 1 H), 3.66 – 3.58 (m, 1 H), 3.58 (s, 3 H), 2.89 (dd, *J* = 16.2, 5.8 Hz, 1 H), 2.72 (dd, *J* = 16.2, 8.8 Hz, 1 H), 2.63 – 2.45 (m, 2 H), 2.28 – 2.19 (m, 1 H), 2.16 – 2.07 (m, 1 H); <sup>13</sup>C NMR (100 MHz, CDCl<sub>3</sub>): δ 199.3 (CH), 170.9 (C), 135.8 (C), 134.0 (C), 129.2 (2 CH), 129.0 (2 CH), 90.5 (CH), 52.0 (CH<sub>3</sub>), 44.5 (CH), 39.6 (CH<sub>2</sub>), 36.4 (CH<sub>2</sub>), 23.5 (CH<sub>2</sub>).

**Preparation of (3*S*,4*S*)-methyl 3-(4-bromophenyl)-4-nitro-7-oxoheptanoate (*syn*-**3d**) and (3*S*,4*R*)-methyl 3-(4-bromophenyl)-4-nitro-7-oxoheptanoate (*anti*-**3d**)**

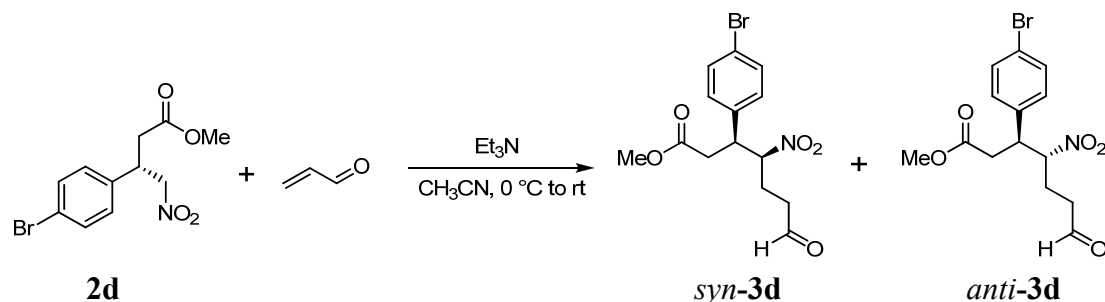

To a solution of **2d** (60.4 mg, 0.2 mmol) and Et<sub>3</sub>N (20.2 mg, 0.2 mmol, 1 equiv) in CH<sub>3</sub>CN (1.8 mL) was added a solution of acrylaldehyde (22.4 mg, 0.4 mmol, 2.0 equiv) in CH<sub>3</sub>CN (0.2 mL) at 0 °C. The resulting solution was stirred at room temperature for 22 h until the completion of the reaction, as monitored by TLC. The reaction solution was concentrated *in vacuo* to give the yellow oil residue. The crude product was purified by flash column chromatography with 15% EtOAc–hexane (*R<sub>f</sub>* = 0.31 for *syn*-**3d**, *R<sub>f</sub>* = 0.16 for *anti*-**3d**, in 25% EtOAc–hexane) to afford the product *syn*-**3d** (40.8 mg, 57% yield) and *anti*-**3d** (17.9 mg, 25% yield) as colorless oils.

Selected spectroscopic data of *syn*-**3d**: [ $\alpha$ ]<sub>D</sub><sup>28</sup> –2.6 (*c* 0.5, CH<sub>2</sub>Cl<sub>2</sub>); IR (neat): 2924, 2851, 2730, 1731, 1548, 1488, 1436, 1412, 1361, 1235, 1166, 1109, 1072, 1011, 827, 722 cm<sup>-1</sup>; <sup>1</sup>H NMR (400 MHz, CDCl<sub>3</sub>)  $\delta$  9.65 (s, 1 H), 7.47 (d, *J* = 8.5 Hz, 2 H), 7.09 (d, *J* = 8.5 Hz, 2 H), 4.79 – 4.73 (m, 1 H), 3.67 – 3.61 (m, 1 H), 3.52 (s, 3 H), 2.71 (dd, *J* = 16.0, 10.2 Hz, 1 H), 2.61 (dd, *J* = 16.0, 4.4 Hz, 1 H), 2.49 – 2.35 (m, 2 H), 2.03 – 1.90 (m, 1 H), 1.88 – 1.80 (m, 1 H); <sup>13</sup>C NMR (100 MHz, CDCl<sub>3</sub>)  $\delta$  199.2 (CH), 170.5 (C), 136.3 (C), 132.4 (2 CH), 129.8 (2 CH), 122.3 (C), 90.7 (CH), 51.9 (CH<sub>3</sub>), 45.2 (CH), 39.5 (CH<sub>2</sub>), 37.5 (CH<sub>2</sub>), 24.3 (CH<sub>2</sub>); MS (*m/z*, relative intensity): 359 (M<sup>+</sup>+2, 0.5), 357 (M<sup>+</sup>, 0.5), 328 (4), 326 (5), 313 (16), 311 (17), 281 (58), 279 (59), 237 (48), 209 (67), 201 (76), 199 (79), 184 (52), 182 (54), 128 (100), 116 (91), 115 (89); exact mass calculated for C<sub>14</sub>H<sub>16</sub>O<sub>5</sub>NBr (M<sup>+</sup>): 357.0212; found: 357.0212.

Selected spectroscopic data of *anti*-**3d**: [ $\alpha$ ]<sub>D</sub><sup>28</sup> 14.0 (*c* 0.4, CH<sub>2</sub>Cl<sub>2</sub>) <sup>1</sup>H NMR (400 MHz, CDCl<sub>3</sub>):  $\delta$  9.73 (s, 1 H), 7.41 (d, *J* = 8.4 Hz, 2 H), 7.02 (d, *J* = 8.4 Hz, 2 H), 4.86 – 4.78 (m, 1 H), 3.65 – 3.61 (m, 1 H), 3.58 (s, 3 H), 2.88 (dd, *J* = 16.3, 5.7 Hz, 1 H), 2.71 (dd, *J* = 16.3, 8.8 Hz, 1 H), 2.63 – 2.44 (m, 2 H), 2.27 – 2.19 (m, 1 H), 2.15 – 2.06 (m, 1 H); <sup>13</sup>C NMR (100 MHz, CDCl<sub>3</sub>):  $\delta$  199.3 (CH), 171.0 (C), 136.5 (C), 132.0 (2 CH), 129.6 (2 CH), 122.3 (C), 90.5 (CH), 52.1 (CH<sub>3</sub>), 44.7 (CH), 39.7 (CH<sub>2</sub>), 36.4 (CH<sub>2</sub>), 23.6 (CH<sub>2</sub>).

**Preparation of (3*S*,4*S*)-methyl 4-nitro-7-oxo-3-*p*-tolylheptanoate (*syn*-**3e**) and (3*S*,4*R*)-methyl 4-nitro-7-oxo-3-*p*-tolylheptanoate (*anti*-**3e**)**

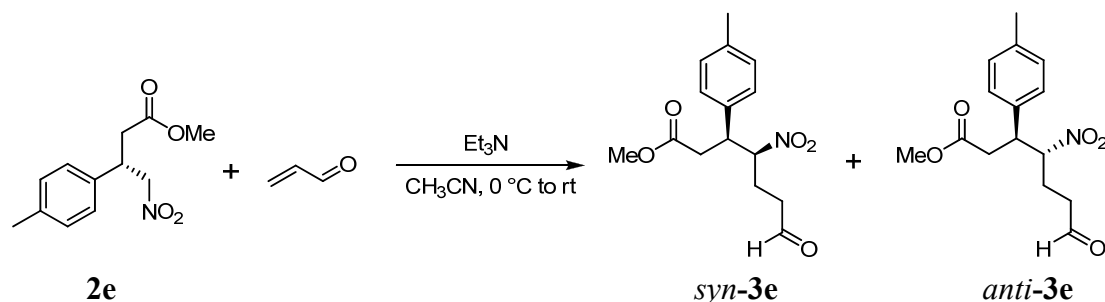

To a solution of **2e** (47.5 mg, 0.2 mmol) and Et<sub>3</sub>N (20.2 mg, 0.2 mmol, 1 equiv) in CH<sub>3</sub>CN (1.8 mL) was added a solution of acrylaldehyde (22.4 mg, 0.4 mmol, 2.0 equiv) in CH<sub>3</sub>CN (0.2 mL) at 0 °C. The resulting solution was stirred at room temperature for 17 h until the completion of the reaction, as monitored by TLC. The reaction solution was concentrated *in vacuo* to give the yellow oil residue. The crude product was purified by flash column chromatography with 15% EtOAc–hexane (*R<sub>f</sub>* = 0.31 for *syn*-**3e**, *R<sub>f</sub>* = 0.16 for *anti*-**3e**, in 25% EtOAc–hexane) to afford the product *syn*-**3e** (41.7 mg, 71% yield) and *anti*-**3e** (10.6 mg, 18% yield) as colorless oils.

Selected spectroscopic data of *syn*-**3e**: [ $\alpha$ ]<sub>D</sub><sup>28</sup> –3.5 (*c* 0.5, CH<sub>2</sub>Cl<sub>2</sub>); IR (neat): 2924, 2849, 2730, 1735, 1548, 1514, 1436, 1362, 1255, 1163, 1116, 1020, 959, 820, 722 cm<sup>-1</sup>; <sup>1</sup>H NMR (400 MHz, CDCl<sub>3</sub>):  $\delta$  9.63 (s, 1 H), 7.13 (d, *J* = 8.0 Hz, 2 H), 7.07 (d, *J* = 8.0 Hz, 2 H), 4.78 – 4.72 (m, 1 H), 3.65 – 3.58 (m, 1 H), 3.50 (s, 3 H), 2.73 (dd, *J* = 15.7, 10.2 Hz, 1 H), 2.60 (dd, *J* = 15.7, 4.4 Hz, 1 H), 2.48 – 2.33 (m, 2 H), 2.30 (s, 3 H), 2.02 – 1.92 (m, 1 H), 1.90 – 1.81 (m, 1 H); <sup>13</sup>C NMR (100 MHz, CDCl<sub>3</sub>):  $\delta$  199.3 (CH), 170.8 (C), 137.9 (C), 134.1 (C), 129.9 (2 CH), 127.9 (2 CH), 91.2 (CH), 51.8 (CH<sub>3</sub>), 45.3 (CH), 39.6 (CH<sub>2</sub>), 37.7 (CH<sub>2</sub>), 24.3 (CH<sub>2</sub>), 21.1 (CH<sub>3</sub>); MS (*m/z*, relative intensity): 293 (M<sup>+</sup>, 0.4), 262 (7), 246 (19), 215 (44), 190 (33), 173 (31), 169 (28), 143 (99), 135 (100), 129 (62), 105 (49); exact mass calculated for C<sub>15</sub>H<sub>19</sub>O<sub>5</sub>N (M<sup>+</sup>): 293.1263; found: 293.1262.

Selected spectroscopic data of *anti*-**3e**: [ $\alpha$ ]<sub>D</sub><sup>28</sup> 9.4 (*c* 0.5, CH<sub>2</sub>Cl<sub>2</sub>); <sup>1</sup>H NMR (400 MHz, CDCl<sub>3</sub>):  $\delta$  9.73 (s, 1 H), 7.09 (d, *J* = 8.0 Hz, 2 H), 7.02 (d, *J* = 8.0 Hz, 2 H), 4.84 – 4.78 (m, 1 H), 3.65 – 3.57 (m, 1 H), 3.58 (s, 3 H), 2.89 (dd, *J* = 16.2, 6.0 Hz, 1 H), 2.74 (dd, *J* = 16.2, 8.6 Hz, 1 H), 2.61 – 2.45 (m, 2 H), 2.28 (s, 3 H), 2.26 – 2.07 (m, 2 H); <sup>13</sup>C NMR (100 MHz, CDCl<sub>3</sub>):  $\delta$  199.5 (CH), 171.4 (C), 137.9 (C), 134.3 (C), 129.5 (2 CH), 127.7 (2 CH), 90.8 (CH), 52.0 (CH<sub>3</sub>), 44.8 (CH), 39.8 (CH<sub>2</sub>), 36.5 (CH<sub>2</sub>), 23.4 (CH<sub>2</sub>), 21.1 (CH<sub>3</sub>).

**Preparation of (3*S*,4*S*)-methyl 3-(2-bromophenyl)-4-nitro-7-oxoheptanoate (*syn*-**3f**) and (3*S*,4*R*)-methyl 3-(2-bromophenyl)-4-nitro-7-oxoheptanoate (*anti*-**3f**)**

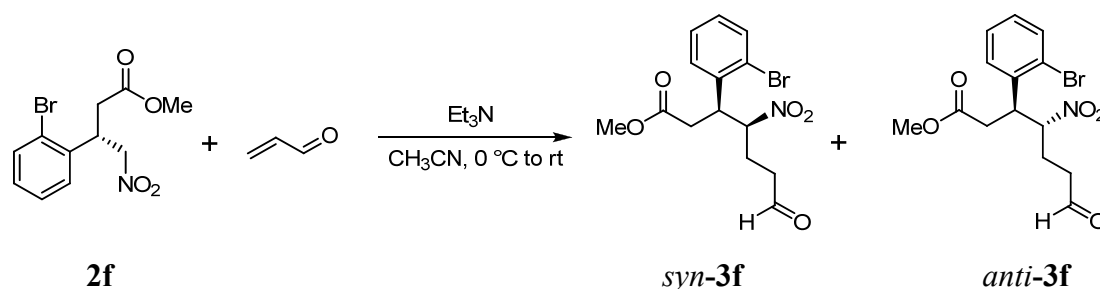

To a solution of **2f** (60.4 mg, 0.2 mmol) and Et<sub>3</sub>N (20.2 mg, 0.2 mmol, 1 equiv) in CH<sub>3</sub>CN (1.8 mL) was added a solution of acrylaldehyde (22.4 mg, 0.4 mmol, 2.0 equiv) in CH<sub>3</sub>CN (0.2 mL) at 0 °C. The resulting solution was stirred at room temperature for 20 h until the completion of the reaction, as monitored by TLC. The reaction solution was concentrated *in vacuo* to give the yellow oil residue. The crude product was purified by flash column chromatography with 15% EtOAc–hexane ( $R_f = 0.29$  for *syn*-**3f**,  $R_f = 0.20$  for *anti*-**3f**, in 25% EtOAc–hexane) to afford the product *syn*-**3f** (40.8 mg, 57% yield) and *anti*-**3f** (16.5 mg, 23% yield) as colorless oils.

Selected spectroscopic data of *syn*-**3f**:  $[\alpha]_D^{28} -29.2$  ( $c$  0.5, CH<sub>2</sub>Cl<sub>2</sub>); IR (neat): 2953, 2849, 2726, 1736, 1549, 1473, 1436, 1362, 1252, 1167, 1022, 851, 756 cm<sup>-1</sup>; <sup>1</sup>H NMR (500 MHz, acetone-*d*<sub>6</sub>):  $\delta$  9.64 (s, 1 H), 7.68 (dd,  $J = 8.0, 1.0$  Hz, 1 H), 7.49 (dd,  $J = 8.0, 2.0$  Hz, 1 H), 7.41 (ddd,  $J = 8.0, 7.5, 1.0$  Hz, 1 H), 7.25 (ddd,  $J = 8.0, 7.5, 2.0$  Hz, 1 H), 5.01 – 4.99 (m, 1 H), 4.38 – 4.36 (m, 1 H), 3.49 (s, 3 H), 2.96 (dd,  $J = 16.0, 10.0$  Hz, 1 H), 2.75 (dd,  $J = 16.0, 4.5$  Hz, 1 H), 2.53 – 2.50 (m, 2 H), 2.21 – 2.13 (m, 1 H), 1.94 – 1.87 (m, 1 H); <sup>13</sup>C NMR (125 MHz, acetone-*d*<sub>6</sub>):  $\delta$  200.6 (CH), 171.1 (C), 138.6 (C), 134.3 (CH), 130.4 (CH), 129.8 (CH), 129.3 (CH), 126.4 (C), 92.1 (CH), 51.9 (CH<sub>3</sub>), 44.4 (CH), 40.2 (CH<sub>2</sub>), 37.1 (CH<sub>2</sub>), 24.8 (CH<sub>2</sub>); MS ( $m/z$ , relative intensity): 359 (M<sup>+</sup>+2, 0.7), 357 (M<sup>+</sup>, 0.7), 279 (12), 278 (65), 209 (22), 201 (30), 199 (32), 184 (23), 182 (25), 171 (22), 161 (100); Exact mass calculated for C<sub>14</sub>H<sub>16</sub>O<sub>5</sub>NBr (M<sup>+</sup>): 357.0212; found: 357.0210.

Selected spectroscopic data of *anti*-**3f**:  $[\alpha]_D^{28} -7.5$  ( $c$  0.5, CH<sub>2</sub>Cl<sub>2</sub>); <sup>1</sup>H NMR (500 MHz, acetone-*d*<sub>6</sub>):  $\delta$  9.73 (s, 1 H), 7.62 (dd,  $J = 8.0, 1.0$  Hz, 1 H), 7.45 (dd,  $J = 8.0, 2.0$  Hz, 1 H), 7.37 (ddd,  $J = 8.0, 8.0, 1.0$  Hz, 1 H), 7.21 (ddd,  $J = 8.0, 8.0, 2.0$  Hz, 1 H), 5.20 – 5.12 (m, 1 H), 4.42 – 4.35 (m, 1 H), 3.55 (s, 3 H), 3.03 – 2.91 (m, 2 H), 2.66 – 2.54 (m, 2 H), 2.41 – 2.34 (m, 1 H), 2.26 – 2.18 (m, 1 H); <sup>13</sup>C NMR (125 MHz, acetone-*d*<sub>6</sub>):  $\delta$  200.8 (CH), 171.5 (C), 138.9 (C), 134.3 (CH), 130.4 (CH), 129.7 (CH), 128.9 (CH), 125.9 (C), 91.0 (CH), 52.1 (CH<sub>3</sub>), 44.4 (CH), 40.4 (CH<sub>2</sub>), 36.6 (CH<sub>2</sub>), 24.1 (CH<sub>2</sub>). Two aryl carbons are broadened and disappeared due to the slow rotation and coalescence phenomenon.

**Preparation of (3*S*,4*S*)-methyl 3-(2-chloro-6-methylphenyl)-4-nitro-7-oxoheptanoate (*syn*-**3g**) and (3*S*,4*R*)-methyl 3-(2-chloro-6-methylphenyl)-4-nitro-7-oxoheptanoate (*anti*-**3g**)**

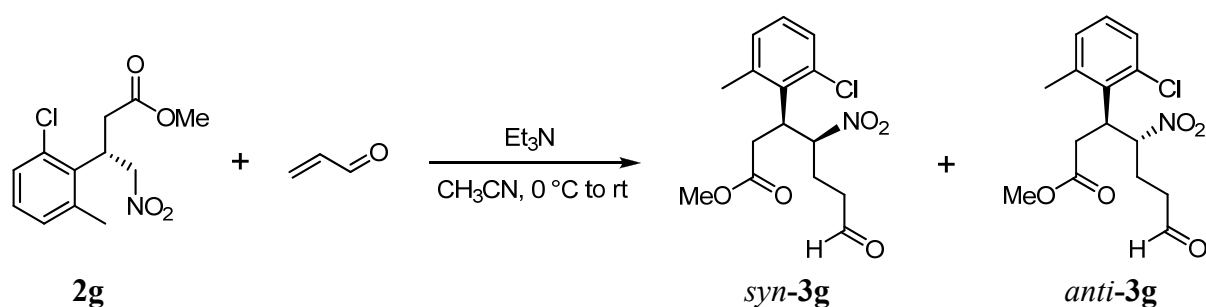

To a solution of **2f** (54.3 mg, 0.2 mmol) and Et<sub>3</sub>N (20.2 mg, 0.2 mmol, 1 equiv) in CH<sub>3</sub>CN (1.8 mL) was added a solution of acrylaldehyde (22.4 mg, 0.4 mmol, 2.0 equiv) in CH<sub>3</sub>CN (0.2 mL) at 0 °C. The resulting solution was stirred at room temperature for 19 h until the completion of the reaction, as monitored by TLC. The reaction solution was concentrated *in vacuo* to give the yellow oil residue. The crude product was purified by flash column chromatography with 15% EtOAc–hexane ( $R_f = 0.43$  for *syn*-**3g**,  $R_f = 0.31$  for *anti*-**3g**, in 25% EtOAc–hexane) to afford the product *syn*-**3g** (18.4 mg, 28% yield) and *anti*-**3g** (36.1 mg, 55% yield) as colorless oils.

Selected spectroscopic data of *syn*-**3g**:  $[\alpha]_{\text{D}}^{28} -21.9$  ( $c$  0.5, CH<sub>2</sub>Cl<sub>2</sub>); IR (neat): 2953, 2847, 2730, 1738, 1551, 1437, 1369, 1232, 1200, 1168, 1129, 1071, 969, 848, 780 cm<sup>-1</sup>; <sup>1</sup>H NMR (400 MHz, CDCl<sub>3</sub>):  $\delta$  9.62 (s, 1 H), 7.20 (dd,  $J = 6.6, 2.8$  Hz, 1 H), 7.14 – 7.07 (m, 2 H), 5.45 – 5.39 (m, 1 H), 4.35 – 4.29 (m, 1 H), 3.50 (s, 3 H), 3.37 (dd,  $J = 16.5, 9.9$  Hz, 1 H), 2.60 (dd,  $J = 16.5, 4.4$  Hz, 1 H), 2.56 (s, 3 H), 2.43 – 2.37 (m, 2 H), 2.02 – 1.92 (m, 1 H), 1.76 – 1.67 (m, 1 H); <sup>13</sup>C NMR (100 MHz, CDCl<sub>3</sub>):  $\delta$  198.9 (CH), 171.3 (C), 141.1 (C), 133.4 (C), 133.3 (C), 130.0 (CH), 129.5 (CH), 129.0 (CH), 89.7 (CH), 51.8 (CH<sub>3</sub>), 40.5 (CH), 39.9 (CH<sub>2</sub>), 35.2 (CH<sub>2</sub>), 24.3 (CH<sub>2</sub>), 21.7 (CH<sub>3</sub>); MS ( $m/z$ , relative intensity): 326 ( $M^+ - 1$ , 4), 292 (28), 249 (13), 236 (35), 223 (38), 177 (73), 169 (96), 129 (71), 115 (100); exact mass calculated for C<sub>15</sub>H<sub>18</sub>O<sub>5</sub>NCl ( $M^+$ ): 327.0874; found: 327.0872.

Selected spectroscopic data of *anti*-**3g**:  $[\alpha]_{\text{D}}^{28} 17.1$  ( $c$  0.5, CH<sub>2</sub>Cl<sub>2</sub>); <sup>1</sup>H NMR (400 MHz, CDCl<sub>3</sub>):  $\delta$  9.77 (s, 1 H), 7.15 (dd,  $J = 7.0, 2.4$  Hz, 1 H), 7.05 – 6.99 (m, 2 H), 5.56 – 5.50 (m, 1 H), 4.33 – 4.27 (m, 1 H), 3.59 (s, 3 H), 3.17 (dd,  $J = 16.7, 8.0$  Hz, 1 H), 2.90 (dd,  $J = 16.7, 5.2$  Hz, 1 H), 2.60 – 2.56 (m, 2 H), 2.44 (s, 3 H), 2.40 – 2.31 (m, 1 H), 2.23 – 2.14 (m, 1 H); <sup>13</sup>C NMR (100 MHz, CDCl<sub>3</sub>):  $\delta$  199.3 (CH), 171.9 (C), 140.7 (C), 133.8 (C), 133.4 (C), 129.9 (CH), 129.3 (CH), 128.9 (CH), 88.6 (CH), 52.1 (CH<sub>3</sub>), 40.0 (CH), 39.6 (CH<sub>2</sub>), 34.9 (CH<sub>2</sub>), 24.5 (CH<sub>2</sub>), 20.9 (CH<sub>3</sub>).

**Preparation of (3*S*,4*S*)-methyl 3-(3-bromo-4-methoxyphenyl)-4-nitro-7-oxoheptanoate (*syn*-**3h**) and (3*S*,4*R*)-methyl 3-(3-bromo-4-methoxyphenyl)-4-nitro-7-oxoheptanoate (*anti*-**3h**)**

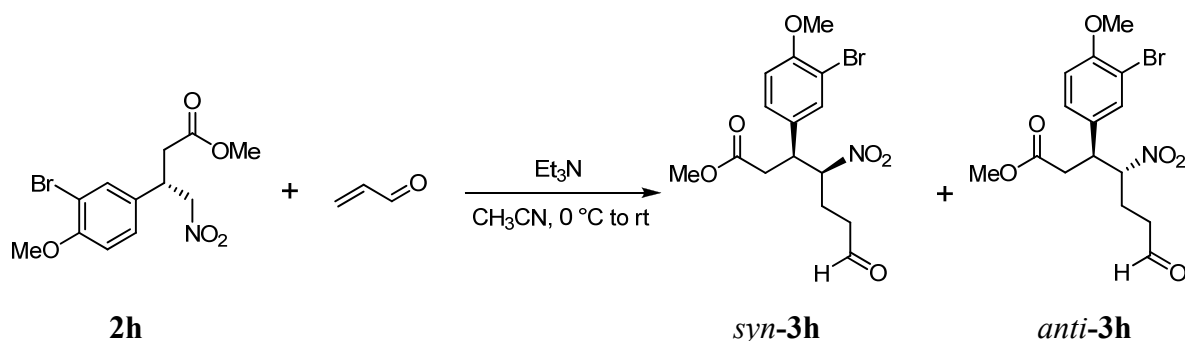

To a solution of **2h** (66.4 mg, 0.2 mmol) and Et<sub>3</sub>N (20.2 mg, 0.2 mmol, 1 equiv) in CH<sub>3</sub>CN (1.8 mL) was added a solution of acrylaldehyde (22.4 mg, 0.4 mmol, 2.0 equiv) in CH<sub>3</sub>CN (0.2 mL) at 0 °C. The resulting solution was stirred at room temperature for 13 h until the completion of the reaction, as monitored by TLC. The reaction solution was concentrated *in vacuo* to give the yellow oil residue. The crude product was purified by flash column chromatography with 20% EtOAc–hexane ( $R_f = 0.27$  for *syn*-**3h**,  $R_f = 0.17$  for *anti*-**3h**, in 30% EtOAc–hexane) to afford the product *syn*-**3h** (46.6 mg, 60% yield) and *anti*-**3h** (16.3 mg, 21% yield) as colorless oils.

Selected spectroscopic data of *syn*-**3h**:  $[\alpha]_D^{28}$  1.1 ( $c$  1.6, CH<sub>2</sub>Cl<sub>2</sub>); IR (neat): 2926, 2842, 2730, 1733, 1603, 1548, 1497, 1437, 1361, 1284, 1259, 1166, 1054, 1018, 816 cm<sup>-1</sup>; <sup>1</sup>H NMR (400 MHz, CDCl<sub>3</sub>):  $\delta$  9.65 (s, 1 H), 7.38 (d,  $J = 2.2$  Hz, 1 H), 7.13 (dd,  $J = 8.4, 2.2$  Hz, 1 H), 6.86 (d,  $J = 8.4$  Hz, 1 H), 4.75 – 4.69 (m, 1 H), 3.87 (s, 3 H), 3.62 – 3.55 (m, 1 H), 3.53 (s, 3 H), 2.69 (dd,  $J = 16.0, 10.1$  Hz, 1 H), 2.60 (dd,  $J = 16.0, 4.6$  Hz, 1 H), 2.51 – 2.36 (m, 2 H), 2.02 – 1.92 (m, 1 H), 1.92 – 1.82 (m, 1 H); <sup>13</sup>C NMR (100 MHz, CDCl<sub>3</sub>):  $\delta$  199.2 (CH), 170.6 (C), 155.7 (C), 132.7 (CH), 130.7 (C), 128.4 (CH), 112.30 (CH), 112.26 (C), 90.9 (CH), 56.2 (CH<sub>3</sub>), 51.9 (CH<sub>3</sub>), 44.6 (CH), 39.5 (CH<sub>2</sub>), 37.6 (CH<sub>2</sub>), 24.3 (CH<sub>2</sub>); MS ( $m/z$ , relative intensity): 389 (M<sup>+</sup>+2, 13), 387 (M<sup>+</sup>, 13), 342 (23), 340 (23), 311 (31), 309 (31), 286 (44), 284 (46), 239 (44), 231 (97), 229 (100), 212 (43), 158 (55), 146 (67); exact mass calculated for C<sub>15</sub>H<sub>18</sub>O<sub>6</sub>NBr (M<sup>+</sup>): 387.0317; found: 387.0319.

Selected spectroscopic data of *anti*-**3h**:  $[\alpha]_D^{26}$  9.1 ( $c$  0.6, CH<sub>2</sub>Cl<sub>2</sub>); <sup>1</sup>H NMR (400 MHz, CDCl<sub>3</sub>):  $\delta$  9.73 (s, 1H), 7.33 (d,  $J = 2.2$  Hz, 1H), 7.05 (dd,  $J = 8.5, 2.2$  Hz, 1H), 6.80 (d,  $J = 8.5$  Hz, 1H), 4.82 – 4.76 (m, 1H), 3.84 (s, 3H), 3.60 (s, 3H), 3.55 – 3.50 (m, 1H), 2.86 (dd,  $J = 16.2, 5.8$  Hz, 1H), 2.70 (dd,  $J = 16.2, 8.7$  Hz, 1H), 2.62 – 2.46 (m, 2H), 2.27 – 2.18 (m, 1H), 2.16 – 2.06 (m, 1H); <sup>13</sup>C NMR (100 MHz, CDCl<sub>3</sub>):  $\delta$  199.3 (CH), 171.1 (C), 155.7 (C), 132.7 (CH), 130.9 (C), 128.1 (CH), 112.0 (2CH), 111.9 (C), 90.7 (CH), 56.2 (CH<sub>3</sub>), 52.1 (CH<sub>3</sub>), 44.1 (CH), 39.7 (CH<sub>2</sub>), 36.6 (CH<sub>2</sub>), 23.6 (CH<sub>2</sub>).



### Preparation of (3*S*,4*S*)-methyl

### 3-(3-bromo-6-fluoro-2-methoxy-4-methylphenyl)-4-nitro-7-oxoheptanoate (*syn*-**3i**) and (3*S*,4*R*)-methyl 3-(3-bromo-6-fluoro-2-methoxyphenyl)-4-nitro-7-oxoheptanoate (*anti*-**3i**)

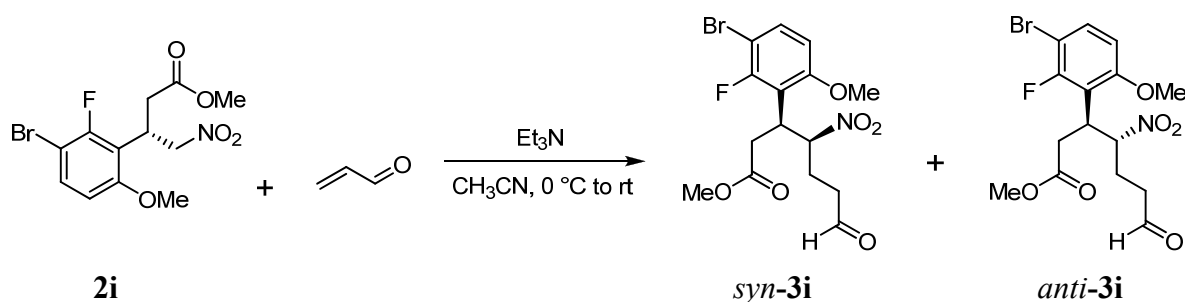

To a solution of **2i** (50.0 mg, 0.14 mmol) and Et<sub>3</sub>N (14 mg, 0.14 mmol, 1 equiv) in CH<sub>3</sub>CN (0.8 mL) was added a solution of acrylaldehyde (16 mg, 0.29 mmol, 2.0 equiv) in CH<sub>3</sub>CN (0.2 mL) at 0 °C. The resulting solution was stirred at room temperature for 16 h until the completion of the reaction, as monitored by TLC. The reaction solution was concentrated *in vacuo* to give the yellow oil residue. The crude product was purified by flash column chromatography with 20% EtOAc–hexane ( $R_f = 0.27$  for *syn*-**3i**,  $R_f = 0.17$  for *anti*-**3i**, in 30% EtOAc–hexane) to afford the product *syn*-**3i** (32.8 mg, 57% yield) and *anti*-**3i** (11.4 mg, 20% yield) as colorless oils.

Selected spectroscopic data of *syn*-**3i**:  $[\alpha]_D^{28} -10.7$  ( $c$  0.5, CH<sub>2</sub>Cl<sub>2</sub>); IR (neat): 2948, 2844, 2730, 1738, 1551, 1478, 1439, 1362, 1284, 1222, 1170, 1088, 804 cm<sup>-1</sup>; <sup>1</sup>H NMR (400 MHz, CDCl<sub>3</sub>):  $\delta$  9.64 (s, 1 H), 7.42 (dd,  $J = 9.0, 8.0$  Hz, 1 H), 6.62 (dd,  $J = 9.0, 1.6$  Hz, 1 H), 5.10 – 5.04 (m, 1 H), 4.32 – 4.26 (m, 1 H), 3.88 (s, 3 H), 3.51 (s, 3 H), 3.01 (dd,  $J = 15.2, 10.4$  Hz, 1 H), 2.52 (dd,  $J = 16.0, 4.4$  Hz, 1 H), 2.44 – 2.41 (m, 2 H), 2.01 – 1.91 (m, 1 H), 1.85 – 1.76 (m, 1 H); <sup>13</sup>C NMR (100 MHz, CDCl<sub>3</sub>):  $\delta$  199.2 (CH), 170.8 (C), 157.7 (d,  $J = 245$  Hz, C), 157.9 (d,  $J = 7$  Hz, C), 133.0 (d,  $J = 2$  Hz, CH), 114.8 (d,  $J = 16$  Hz, C) 108.3 (d,  $J = 4$  Hz, CH), 100.7 (d,  $J = 24$  Hz, C), 88.8 (CH), 56.3 (CH<sub>3</sub>), 51.8 (CH<sub>3</sub>), 39.3 (CH<sub>2</sub>), 35.9 (CH), 35.0 (CH<sub>2</sub>), 24.4 (CH<sub>2</sub>); MS ( $m/z$ , relative intensity): 407 (M<sup>+</sup>+2, 79), 405 (M<sup>+</sup>, 80), 329 (60), 327 (62), 301 (54), 299 (58), 259 (42), 257 (51), 249 (75), 247 (77), 219 (65), 217 (76), 202 (56), 150 (40), 136 (100); exact mass calculated for C<sub>15</sub>H<sub>17</sub>BrFNO<sub>6</sub> (M<sup>+</sup>): 405.0223; found: 405.0220.

Selected spectroscopic data of *anti*-**3i**:  $[\alpha]_D^{28} 14.3$  ( $c$  0.5, CH<sub>2</sub>Cl<sub>2</sub>); <sup>1</sup>H NMR (400 MHz, CDCl<sub>3</sub>):  $\delta$  9.75 (s, 1 H), 7.37 (dd,  $J = 8.8, 8.0$  Hz, 1 H), 6.55 (dd,  $J = 8.8, 1.2$  Hz, 1 H), 5.08 – 5.03 (m, 1 H), 4.25 (q,  $J = 7.9$  Hz, 1 H), 3.80 (s, 3 H), 3.60 (s, 3 H), 2.95 – 2.84 (m, 2 H), 2.62 – 2.48 (m, 2 H), 2.36 – 2.25 (m, 1 H), 2.19 – 2.10 (m, 1 H); <sup>13</sup>C NMR (100 MHz, CDCl<sub>3</sub>):  $\delta$  199.4 (CH), 171.5 (C), 157.6 (d,  $J = 245$  Hz, C), 158.0 (d,  $J = 6$  Hz, C) 132.8 (d,  $J = 2$  Hz, CH), 115.2 (d,  $J = 17$  Hz, C), 108.2 (d,  $J = 3$  Hz, CH), 100.6 (d,  $J = 24$  Hz, C), 88.5 (CH), 56.2 (CH<sub>3</sub>), 52.0 (CH<sub>3</sub>), 39.7 (CH<sub>2</sub>), 35.9 (CH), 34.6 (CH<sub>2</sub>), 24.0 (CH<sub>2</sub>).







**Preparation of (1*S*,7*aS*)-1-(4-fluorophenyl)tetrahydro-1*H*-pyrrolizin-3(2*H*)-one (*syn*-4*b*)**

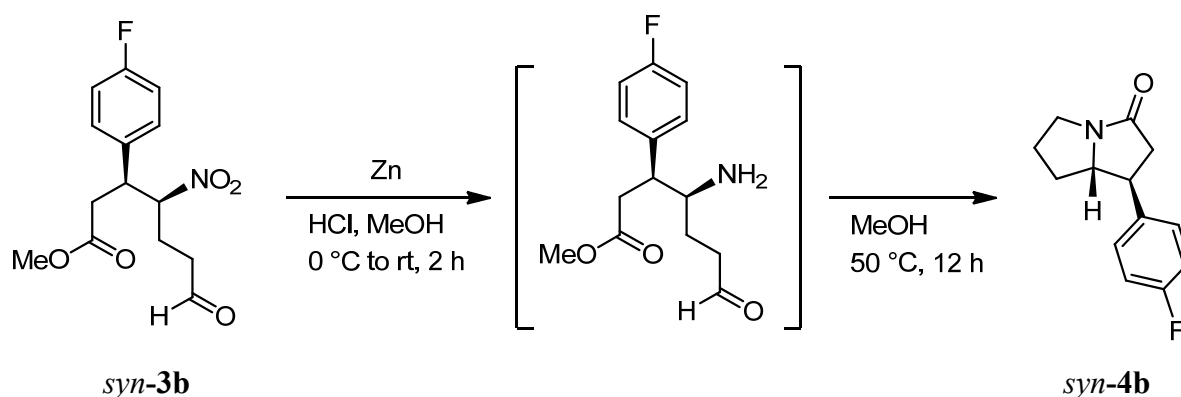

To a solution of *syn*-**3b** (19.0 mg, 0.06 mmol) in conc. aqueous HCl–MeOH (1:1 v/v, 0.3 mL) was slowly added zinc powder (83.7 mg, 1.28 mmol, 20 equiv) over three portions at 0 °C. The resulting mixture was stirred and gradually warmed up to ambient temperature over 2 h until the completion of the reaction, as monitored by TLC. The reaction mixture was filtered, and the filtrate was neutralized to *ca.* pH = 8 by the addition of NaHCO<sub>3</sub>. The solution was extracted with EtOAc (15 mL x 3) and washed with brine (15 mL). The organic extract was dried over MgSO<sub>4</sub> and concentrated *in vacuo* to give a yellow oil residue. A solution of the residue in MeOH (1.0 mL) was heated to 50 °C for 12 h until the completion of the reaction, as monitored by TLC. The solution was concentrated *in vacuo*, and the residue was purified by flash column chromatography with 80% EtOAc–hexane ( $R_f$  = 0.45 for *syn*-**4b** in EtOAc) to afford the product *syn*-**4b** (7.2 mg, 51% yield) as a light yellow oil. Selected spectroscopic data of *syn*-**4b**:  $[\alpha]_D^{27}$  –42.7 (*c* 0.5, CH<sub>2</sub>Cl<sub>2</sub>); IR (neat): 2968, 2878, 1692, 1603, 1511, 1413, 1259, 1224, 1161, 1096, 1015, 838, 794 cm<sup>-1</sup>; <sup>1</sup>H NMR (500 MHz, CDCl<sub>3</sub>):  $\delta$  7.20 (dd,  $J$  = 8.5, 5.5 Hz, 2 H), 7.02 (dd,  $J$  = 8.5, 8.5 Hz, 2 H), 3.90 – 3.86 (m, 1 H), 3.63 – 3.58 (m, 1 H), 3.25 – 3.22 (m, 1 H), 3.13 – 3.08 (m, 1 H), 2.91 (dd,  $J$  = 16.5, 12.0 Hz, 1 H), 2.79 (dd,  $J$  = 16.5, 8.5 Hz, 1 H), 2.17 – 1.99 (m, 3 H), 1.56 – 1.49 (m, 1 H); <sup>13</sup>C NMR (125 MHz, CDCl<sub>3</sub>):  $\delta$  172.9 (C), 161.8 (d,  $J$  = 244.5 Hz, C), 136.2 (d,  $J$  = 3 Hz, C), 128.5 (d,  $J$  = 8.3 Hz, 2 CH), 115.6 (d,  $J$  = 21.5 Hz, 2 CH), 68.7 (CH), 47.9 (CH), 43.2 (CH<sub>2</sub>), 41.4 (CH<sub>2</sub>), 31.3 (CH<sub>2</sub>), 27.0 (CH<sub>2</sub>); MS ( $m/z$ , relative intensity): 219 (M<sup>+</sup>, 67), 191 (1), 176 (1), 162 (1), 148 (7), 133 (5), 122 (100), 101 (11), 70 (100); exact mass calculated for C<sub>13</sub>H<sub>14</sub>ONF (M<sup>+</sup>) 219.1059; found: 219.1058.

Preparation of (1*S*,7*aR*)-1-(4-fluorophenyl)tetrahydro-1*H*-pyrrolizin-3(2*H*)-one (*anti*-4*b*)

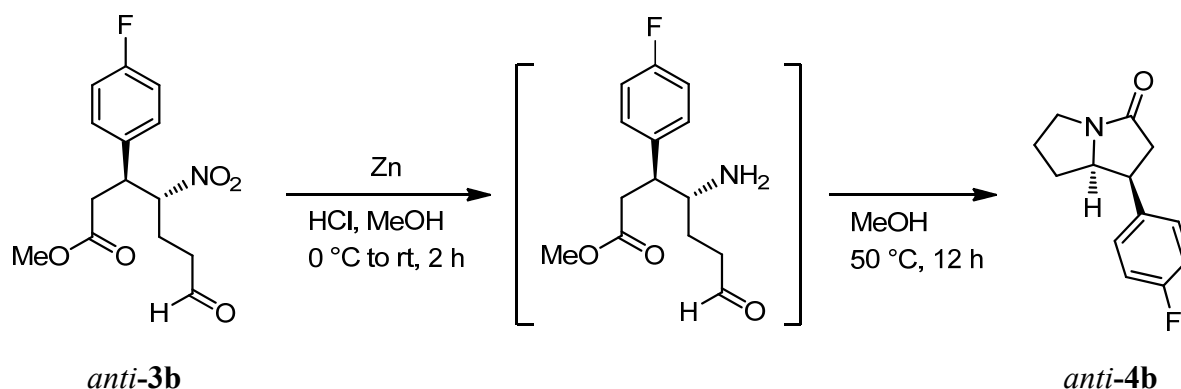

To a solution of *anti*-3*b* (10.0 mg, 0.03 mmol) in conc. aqueous HCl–MeOH (1:1 v/v, 0.2 mL) was slowly added zinc powder (44.2 mg, 0.68 mmol, 20 equiv) over three portions at 0 °C. The resulting mixture was stirred and gradually warmed up to ambient temperature over 2 h until the completion of the reaction, as monitored by TLC. The reaction mixture was filtered, and the filtrate was neutralized to *ca.* pH = 8 by the addition of NaHCO<sub>3</sub>. The solution was extracted with EtOAc (10 mL x 3) and washed with brine (10 mL). The organic extract was dried over MgSO<sub>4</sub> and concentrated *in vacuo* to give a yellow oil residue. A solution of the residue in MeOH (1.0 mL) was heated to 50 °C for 12 h until the completion of the reaction, as monitored by TLC. The solution was concentrated *in vacuo*, and the residue was purified by flash column chromatography with 80% EtOAc–hexane ( $R_f$  = 0.44 for *anti*-4*b* in EtOAc) to afford the product *anti*-4*a* (3.8 mg, 52% yield) as a light yellow oil. Selected spectroscopic data of *anti*-4*a*:  $[\alpha]_D^{27}$  277.1 (*c* 0.2, CH<sub>2</sub>Cl<sub>2</sub>); <sup>1</sup>H NMR (500 MHz, CDCl<sub>3</sub>):  $\delta$  7.06 – 7.02 (m, 2 H), 7.00 – 6.96 (m, 2 H), 4.26 – 4.21 (m, 1 H), 3.67 – 3.64 (m, 1 H), 3.51 – 3.46 (m, 1 H), 3.17 (dd,  $J$  = 16.5, 8.5 Hz, 1 H), 3.08 – 3.03 (m, 1 H), 2.59 (dd,  $J$  = 16.5, 2.0 Hz, 1 H), 1.95 – 1.86 (m, 1 H), 1.84 – 1.76 (m, 1 H), 1.51 – 1.45 (m, 1 H), 0.93 – 0.84 (m, 1 H); <sup>13</sup>C NMR (125 MHz, CDCl<sub>3</sub>):  $\delta$  174.0 (C), 161.8 (d,  $J$  = 244.5 Hz, C) 136.3 (d,  $J$  = 3.3 Hz, C), 129.1 (d,  $J$  = 7.8 Hz, 2 CH), 115.5 (d,  $J$  = 21 Hz, 2 CH), 65.9 (d,  $J$  = 1 Hz, CH), 41.8 (CH<sub>2</sub>), 41.4 (CH<sub>2</sub>), 41.2 (CH), 26.8 (CH<sub>2</sub>), 26.3 (CH<sub>2</sub>).<sup>17</sup>

<sup>17</sup> Zoute, L.; Kociok-Koehn, G.; Frost, C. G. *Org. Lett.* **2009**, *11*, 2491 – 2494.



Preparation of (1*S*,7*aR*)-1-(4-chlorophenyl)tetrahydro-1*H*-pyrrolizin-3(2*H*)-one (*anti*-4*c*)

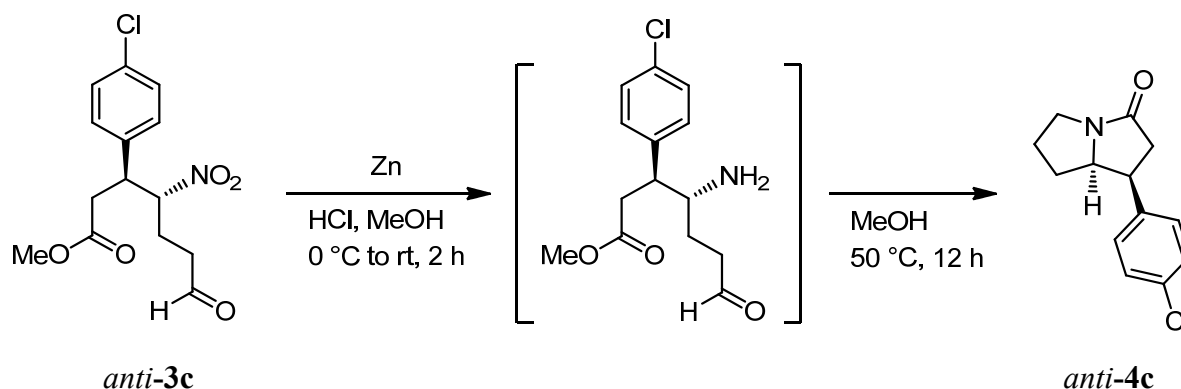

To a solution of *anti*-3*c* (15.0 mg, 0.05 mmol) in conc. aqueous HCl–MeOH (1:1 v/v, 0.25 mL) was slowly added zinc powder (62.8 mg, 0.96 mmol, 20 equiv) over three portions at 0 °C. The resulting mixture was stirred and gradually warmed up to ambient temperature over 2 h until the completion of the reaction, as monitored by TLC. The reaction mixture was filtered, and the filtrate was neutralized to *ca.* pH = 8 by the addition of NaHCO<sub>3</sub>. The solution was extracted with EtOAc (10 mL x 3) and washed with brine (10 mL). The organic extract was dried over MgSO<sub>4</sub> and concentrated *in vacuo* to give a yellow oil residue. A solution of the residue in MeOH (1.0 mL) was heated to 50 °C for 12 h until the completion of the reaction, as monitored by TLC. The solution was concentrated *in vacuo*, and the residue was purified by flash column chromatography with 80% EtOAc–hexane ( $R_f$  = 0.44 for *anti*-4*c* in EtOAc) to afford the product *anti*-4*c* (6.2 mg, 55% yield) as a colorless oil.

Selected spectroscopic data of *anti*-4*c*:  $[\alpha]_D^{27}$  154.2 (*c* 0.5, CH<sub>2</sub>Cl<sub>2</sub>); <sup>1</sup>H NMR (500 MHz, CDCl<sub>3</sub>):  $\delta$  7.27 (d,  $J$  = 8.0 Hz, 2 H), 7.02 (d,  $J$  = 8.0 Hz, 2 H), 4.26 – 4.22 (m, 1 H), 3.66 – 3.63 (m, 1 H), 3.51 – 3.45 (m, 1 H), 3.17 (dd,  $J$  = 17.0, 8.5 Hz, 1 H), 3.08 – 3.03 (m, 1 H), 2.58 (dd,  $J$  = 17.0, 2.0 Hz, 1 H), 1.95 – 1.86 (m, 1 H), 1.84 – 1.77 (m, 1 H), 1.51 – 1.46 (m, 1 H), 0.92 – 0.84 (m, 1 H); <sup>13</sup>C NMR (125 MHz, CDCl<sub>3</sub>):  $\delta$  173.8 (C), 139.1(C), 132.9 (C), 129.0 (2 CH), 128.8 (2 CH), 65.8 (CH), 41.6 (CH<sub>2</sub>), 41.4 (CH<sub>2</sub>), 41.3 (CH), 26.8 (CH<sub>2</sub>), 26.3 (CH<sub>2</sub>).



Preparation of (1*S*,7*aR*)-1-(4-bromophenyl)tetrahydro-1*H*-pyrrolizin-3(2*H*)-one (*anti*-4*d*)

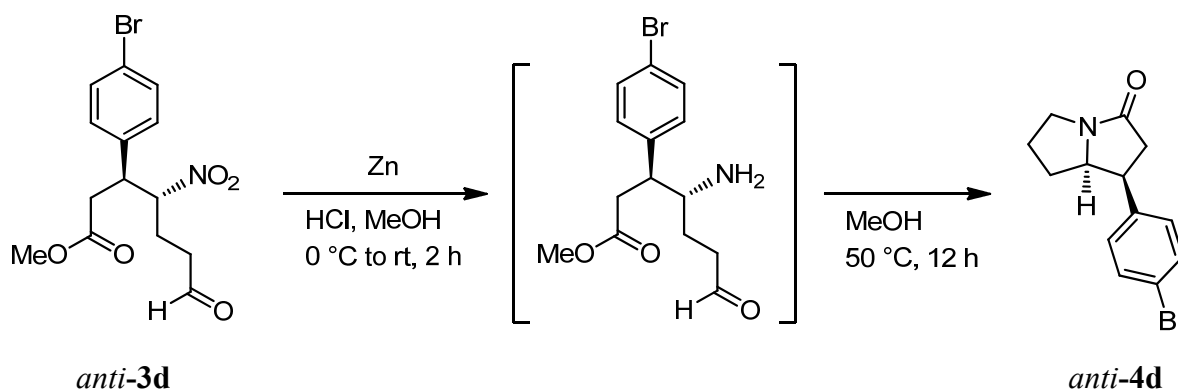

To a solution of *anti*-3*d* (10.0 mg, 0.03 mmol) in conc. aqueous HCl–MeOH (1:1 v/v, 0.15 mL) was slowly added zinc powder (36.4 mg, 0.56 mmol, 20 equiv) over three portions at 0 °C. The resulting mixture was stirred and gradually warmed up to ambient temperature over 2 h until the completion of the reaction, as monitored by TLC. The reaction mixture was filtered, and the filtrate was neutralized to *ca.* pH = 8 by the addition of NaHCO<sub>3</sub>. The solution was extracted with EtOAc (15 mL x 3) and washed with brine (15 mL). The organic extract was dried over MgSO<sub>4</sub> and concentrated *in vacuo* to give a yellow oil residue. A solution of the residue in MeOH (1.0 mL) was heated to 50 °C for 12 h until the completion of the reaction, as monitored by TLC. The solution was concentrated *in vacuo*, and the residue was purified by flash column chromatography with 80% EtOAc–hexane ( $R_f = 0.42$  for *anti*-4*d* in EtOAc) to afford the product *anti*-4*d* (4.6 mg, 59% yield) as a light yellow oil. Selected spectroscopic data of *anti*-4*d*:  $[\alpha]_D^{27}$  157.8 ( $c$  0.14, CH<sub>2</sub>Cl<sub>2</sub>); <sup>1</sup>H NMR (500 MHz, CDCl<sub>3</sub>):  $\delta$  7.42 (d,  $J = 8.5$  Hz, 2H), 6.96 (d,  $J = 8.5$  Hz, 2H), 4.26 – 4.22 (m, 1H), 3.65 – 3.60 (m, 1H), 3.51 – 3.45 (m, 1H), 3.17 (dd,  $J = 17.0, 8.5$  Hz, 1H), 3.08 – 3.03 (m, 1H), 2.58 (dd,  $J = 17.0, 2.5$  Hz, 1H), 1.95 – 1.86 (m, 1H), 1.85 – 1.78 (m, 1H), 1.52 – 1.46 (m, 1H), 0.93 – 0.85 (m, 1H); <sup>13</sup>C NMR (125 MHz, CDCl<sub>3</sub>):  $\delta$  173.8 (C), 139.6 (C), 131.8 (2 CH), 129.4 (2 CH), 121.0 (C), 65.7 (CH), 41.6 (CH<sub>2</sub>), 41.40 (CH<sub>2</sub>), 41.39 (CH), 26.8 (CH<sub>2</sub>), 26.3 (CH<sub>2</sub>).





Preparation of (1*S*,7*aR*)-1-(*p*-tolyl)tetrahydro-1*H*-pyrrolizin-3(2*H*)-one (*anti*-4*e*)

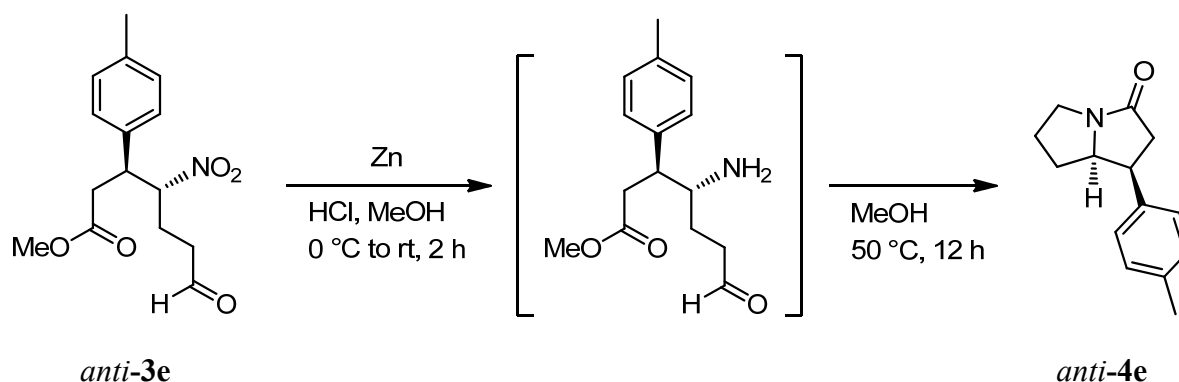

To a solution of *anti*-3*e* (13.0 mg, 0.04 mmol) in conc. aqueous HCl–MeOH (1:1 v/v, 0.2 mL) was slowly added zinc powder (57.5 mg, 0.88 mmol, 20 equiv) over three portions at 0 °C. The resulting mixture was stirred and gradually warmed up to ambient temperature over 2 h until the completion of the reaction, as monitored by TLC. The reaction mixture was filtered, and the filtrate was neutralized to *ca.* pH = 8 by the addition of NaHCO<sub>3</sub>. The solution was extracted with EtOAc (10 mL x 3) and washed with brine (10 mL). The organic extract was dried over MgSO<sub>4</sub> and concentrated *in vacuo* to give a yellow oil residue. A solution of the residue in MeOH (1.0 mL) was heated to 50 °C for 12 h until the completion of the reaction, as monitored by TLC. The solution was concentrated *in vacuo*, and the residue was purified by flash column chromatography with 80% EtOAc–hexane ( $R_f$  = 0.50 for *anti*-4*e* in EtOAc) to afford the product *anti*-4*e* (5.2 mg, 55% yield) as a light yellow oil. Selected spectroscopic data of *anti*-4*e*:  $[\alpha]_D^{25}$  101.6 ( $c$  0.16, CH<sub>2</sub>Cl<sub>2</sub>); <sup>1</sup>H NMR (500 MHz, CDCl<sub>3</sub>):  $\delta$  7.10 (d,  $J$  = 8.0 Hz, 2 H), 6.96 (d,  $J$  = 8.0 Hz, 2 H), 4.25 – 4.20 (m, 1 H), 3.65 – 3.61 (m, 1 H), 3.51 – 3.46 (m, 1 H), 3.15 (dd,  $J$  = 17.0, 8.5 Hz, 1 H), 3.08 – 3.03 (m, 1 H), 2.62 (dd,  $J$  = 17.0, 2.5 Hz, 1 H), 2.31 (s, 3 H), 1.92 – 1.86 (m, 1 H), 1.84 – 1.77 (m, 1 H), 1.50 – 1.44 (m, 1 H), 0.96 – 0.90 (m, 1 H); <sup>13</sup>C NMR (125 MHz, CDCl<sub>3</sub>):  $\delta$  174.4 (C), 137.5 (C), 136.7 (C), 129.3 (2 CH), 127.6 (2 CH), 66.1 (CH), 41.8 (CH), 41.5 (2 CH<sub>2</sub>), 26.8 (CH<sub>2</sub>), 26.4 (CH<sub>2</sub>), 21.0 (CH<sub>3</sub>).

**Preparation of (1*S*,7*aS*)-1-(2-bromophenyl)tetrahydro-1*H*-pyrrolizin-3(2*H*)-one (*syn*-4*f*)**

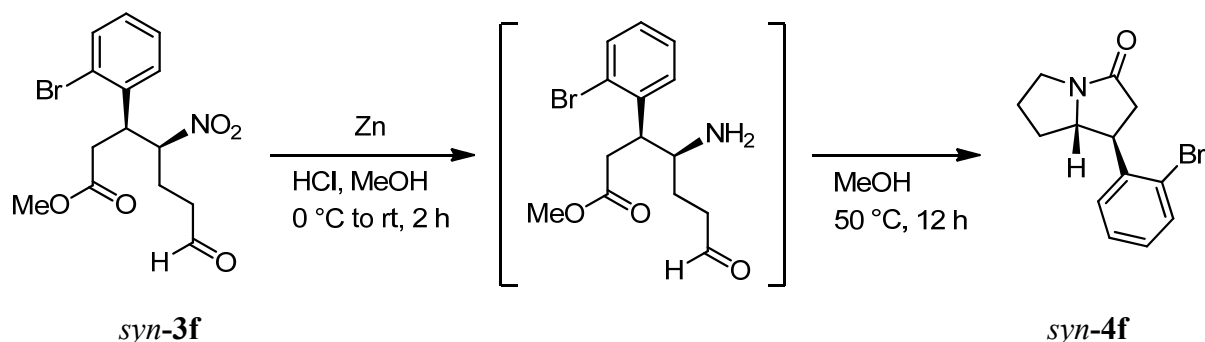

To a solution of *syn*-**3f** (17.0 mg, 0.05 mmol) in conc. aqueous HCl–MeOH (1:1 v/v, 0.25 mL) was slowly added zinc powder (61.5 mg, 0.94 mmol, 20 equiv) over three portions at 0 °C. The resulting mixture was stirred and gradually warmed up to ambient temperature over 2 h until the completion of the reaction, as monitored by TLC. The reaction mixture was filtered, and the filtrate was neutralized to *ca.* pH = 8 by the addition of NaHCO<sub>3</sub>. The solution was extracted with EtOAc (10 mL x 3) and washed with brine (10 mL). The organic extract was dried over MgSO<sub>4</sub> and concentrated *in vacuo* to give a yellow oil residue. A solution of the residue in MeOH (1.0 mL) was heated to 50 °C for 12 h until the completion of the reaction, as monitored by TLC. The solution was concentrated *in vacuo*, and the residue was purified by flash column chromatography with 80% EtOAc–hexane ( $R_f$  = 0.48 for *syn*-**4f** in EtOAc) to afford the product *syn*-**4f** (9.0 mg, 68% yield) as a colorless oil.

Selected spectroscopic data of *syn*-**4f**:  $[\alpha]_D^{28}$  –18.5 (*c* 0.77, CH<sub>2</sub>Cl<sub>2</sub>); IR (neat): 2926, 2876, 1685, 1473, 1439, 1419, 1333, 1286, 1200, 1022, 904, 765, 666 cm<sup>-1</sup>; <sup>1</sup>H NMR (500 MHz, CDCl<sub>3</sub>):  $\delta$  7.56 (d, *J* = 8.0 Hz, 1H), 7.40 (d, *J* = 8.0 Hz, 1H), 7.33 – 7.30 (m, 1H), 7.11 – 7.08 (m, 1H), 3.96 – 3.92 (m, 1H), 3.87 – 3.81 (m, 1H), 3.65 – 3.59 (m, 1H), 3.13 – 3.08 (m, 1H), 2.87 (d, *J* = 9.5 Hz, 2H), 2.18 – 2.10 (m, 1H), 2.07 – 1.95 (m, 2H), 1.61 – 1.53 (m, 1H); <sup>13</sup>C NMR (125 MHz, CDCl<sub>3</sub>):  $\delta$  173.2 (C), 140.0 (C), 133.3 (CH), 128.5 (CH), 128.0 (CH), 127.7 (CH), 124.7 (C), 68.4 (CH), 46.2 (CH), 42.8 (CH<sub>2</sub>), 41.4 (CH<sub>2</sub>), 31.2 (CH<sub>2</sub>), 26.8 (CH<sub>2</sub>); MS (*m/z*, relative intensity): 281 (M<sup>+</sup>+2, 12), 279 (M<sup>+</sup>, 12), 265 (2), 204 (4), 202 (4), 184 (22), 182 (22), 103 (18), 70 (100); exact mass calculated for C<sub>13</sub>H<sub>14</sub>ONBr (M<sup>+</sup>) 279.0259; found: 279.0262.

Preparation of (1*S*,7*aR*)-1-(2-bromophenyl)tetrahydro-1*H*-pyrrolizin-3(2*H*)-one (*anti*-4*f*)

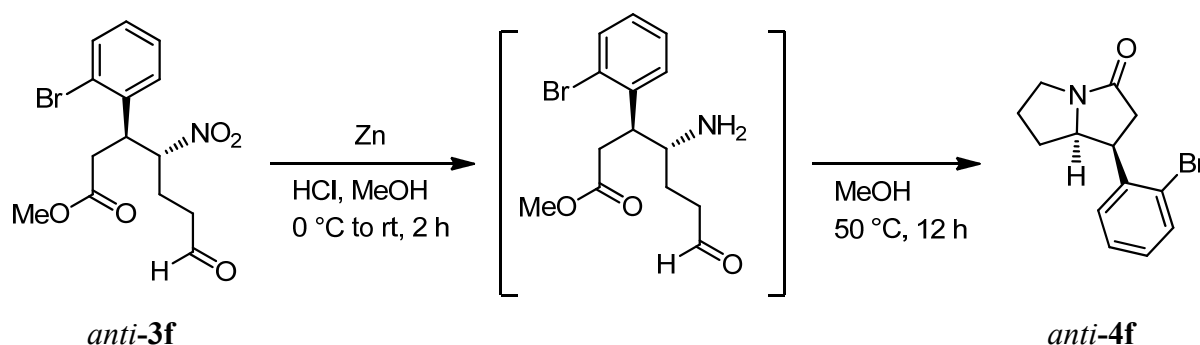

To a solution of *anti*-3*f* (12.0 mg, 0.03 mmol) in conc. aqueous HCl–MeOH (1:1 v/v, 0.15 mL) was slowly added zinc powder (44.2 mg, 0.68 mmol, 20 equiv) over three portions at 0 °C. The resulting mixture was stirred and gradually warmed up to ambient temperature over 2 h until the completion of the reaction, as monitored by TLC. The reaction mixture was filtered, and the filtrate was neutralized to *ca.* pH = 8 by the addition of NaHCO<sub>3</sub>. The solution was extracted with EtOAc (10 mL x 3) and washed with brine (10 mL). The organic extract was dried over MgSO<sub>4</sub> and concentrated *in vacuo* to give a yellow oil residue. A solution of the residue in MeOH (1.0 mL) was heated to 50 °C for 12 h until the completion of the reaction, as monitored by TLC. The solution was concentrated *in vacuo*, and the residue was purified by flash column chromatography with 80% EtOAc–hexane ( $R_f$  = 0.48 for *anti*-4*f* in EtOAc) to afford the product *anti*-4*f* (5.0 mg, 53% yield) as a colorless oil.

Selected spectroscopic data of *anti*-4*f*:  $[\alpha]_D^{26}$  209.2 ( $c$  0.38, CH<sub>2</sub>Cl<sub>2</sub>); <sup>1</sup>H NMR (500 MHz, CDCl<sub>3</sub>):  $\delta$  7.57 (dd,  $J$  = 8.0, 1.5 Hz, 1H), 7.30 – 7.27 (m, 1H), 7.14 – 7.09 (m, 2H), 4.37 – 4.33 (m, 1H), 4.18 – 4.15 (m, 1H), 3.43 – 3.38 (m, 1H), 3.22 – 3.17 (m, 1H), 3.09 – 3.04 (m, 1H), 2.65 (dd,  $J$  = 17.0, 2.0 Hz, 1H), 1.97 – 1.87 (m, 1H), 1.83 – 1.76 (m, 1H), 1.71 – 1.65 (m, 1H), 0.86 – 0.73 (m, 1H); <sup>13</sup>C NMR (125 MHz, CDCl<sub>3</sub>):  $\delta$  173.5 (C), 139.7 (C), 132.9 (CH), 128.6 (CH), 128.0 (2 CH), 125.4 (C), 65.3 (CH), 41.2 (2 CH<sub>2</sub>), 40.8 (CH), 26.9 (CH<sub>2</sub>), 26.3 (CH<sub>2</sub>).<sup>18</sup>

<sup>18</sup> Zoute, L.; Kociok-Koehn, G.; Frost, C. G. *Org. Lett.* **2009**, *11*, 2491 – 2494.

## Preparation of

**(1*S*,7*aS*)-1-(2-chloro-6-methylphenyl)tetrahydro-1*H*-pyrrolizin-3(2*H*)-one (*syn*-4*g*)**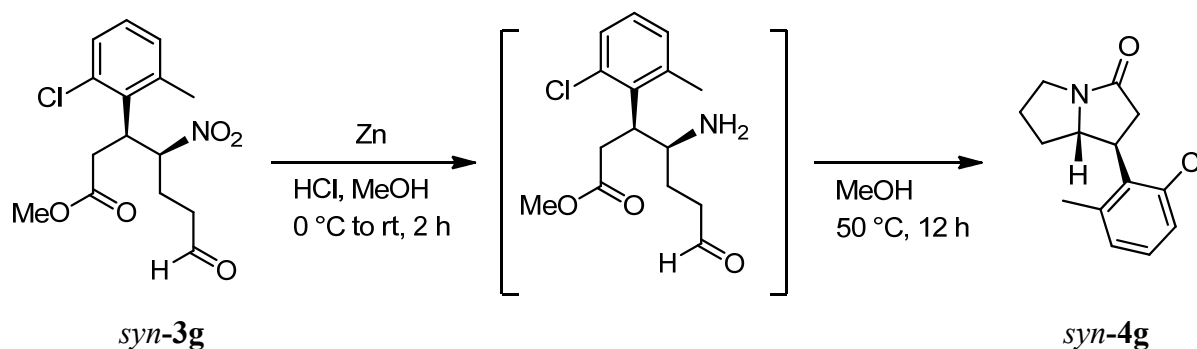

To a solution of *syn*-3*g* (15.0 mg, 0.05 mmol) in conc. aqueous HCl–MeOH (1:1 v/v, 0.25 mL) was slowly added zinc powder (60.2 mg, 0.92 mmol, 20 equiv) over three portions at 0 °C. The resulting mixture was stirred and gradually warmed up to ambient temperature over 2 h until the completion of the reaction, as monitored by TLC. The reaction mixture was filtered, and the filtrate was neutralized to *ca.* pH = 8 by the addition of NaHCO<sub>3</sub>. The solution was extracted with EtOAc (10 mL x 3) and washed with brine (10 mL). The organic extract was dried over MgSO<sub>4</sub> and concentrated *in vacuo* to give a yellow oil residue. A solution of the residue in MeOH (1.0 mL) was heated to 50 °C for 12 h until the completion of the reaction, as monitored by TLC. The solution was concentrated *in vacuo*, and the residue was purified by flash column chromatography with 80% EtOAc–hexane ( $R_f$  = 0.48 for *syn*-4*g* in EtOAc) to afford the product *syn*-4*g* (7.5 mg, 66% yield) as a white solid.

Selected data of *syn*-4*g*: mp: 118–120 °C;  $[\alpha]_D^{25}$  –28.7 (c 0.43, CH<sub>2</sub>Cl<sub>2</sub>); IR (neat): 2964, 2881, 1688, 1454, 1412, 1284, 1211, 1122, 850, 777, 734, 680 cm<sup>-1</sup>; <sup>1</sup>H NMR (500 MHz, CDCl<sub>3</sub>):  $\delta$  7.24 – 7.21 (m, 1 H), 7.08 – 7.05 (m, 2 H), 4.32 – 4.27 (m, 1 H), 3.89 – 3.83 (m, 1 H), 3.66 – 3.60 (m, 1 H), 3.44 (dd,  $J$  = 17.0, 10.5 Hz, 1 H), 3.16 – 3.11 (m, 1 H), 2.70 (dd,  $J$  = 16.5, 10.0 Hz, 1 H), 2.38 (s, 3 H), 2.19 – 2.12 (m, 1 H), 2.06 – 1.97 (m, 2 H), 1.45 – 1.36 (m, 1 H); <sup>13</sup>C NMR (125 MHz, CDCl<sub>3</sub>):  $\delta$  173.9 (C), 138.7 (C), 135.6 (C), 134.3 (C), 129.7 (CH), 129.1 (CH), 127.9 (CH), 65.8 (CH), 41.5 (CH), 41.3 (CH<sub>2</sub>), 40.1 (CH<sub>2</sub>), 32.7 (CH<sub>2</sub>), 26.7 (CH<sub>2</sub>), 21.2 (CH<sub>3</sub>); MS ( $m/z$ , relative intensity): 251 (M<sup>+</sup>+2, 0.7), 249 (M<sup>+</sup>, 2), 186 (1), 152 (18), 117 (15), 115 (11), 70 (100), 58 (29); exact mass calculated for C<sub>14</sub>H<sub>16</sub>ONCl (M<sup>+</sup>) 249.0920; found: 249.0921.

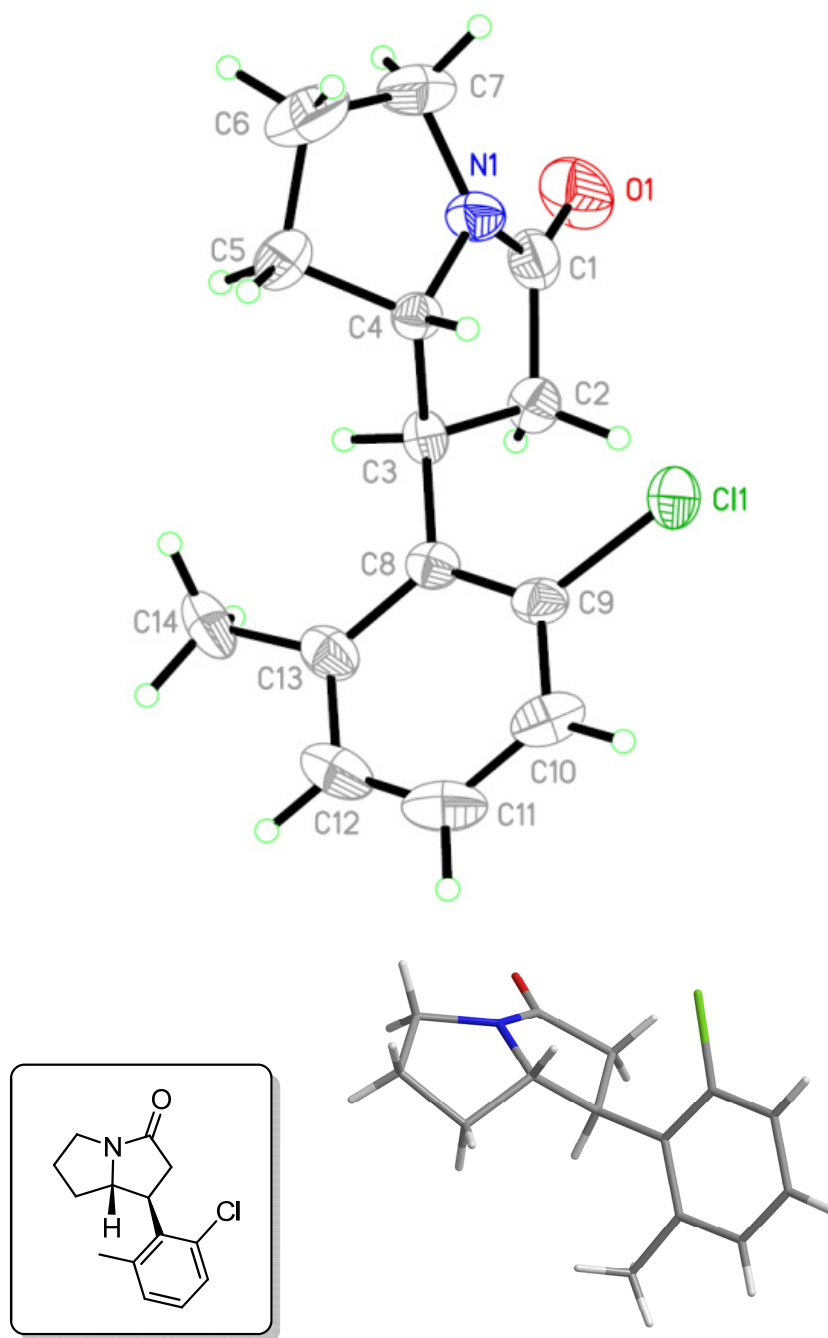

**Figure S1.** ORTEP and Stereo plots for X-ray crystal structures of (-)-*syn*-**4g**. CCDC-1420368 contains the supplementary crystallographic data for (-)-*syn*-**4g**. These data can be obtained free of charge from the Cambridge Crystallographic Data Centre via [www.ccdc.cam.ac.uk/data\\_request/cif](http://www.ccdc.cam.ac.uk/data_request/cif).

## Preparation of

**(1*S*,7*aR*)-1-(2-chloro-6-methylphenyl)tetrahydro-1*H*-pyrrolizin-3(2*H*)-one (*anti*-4*g*)**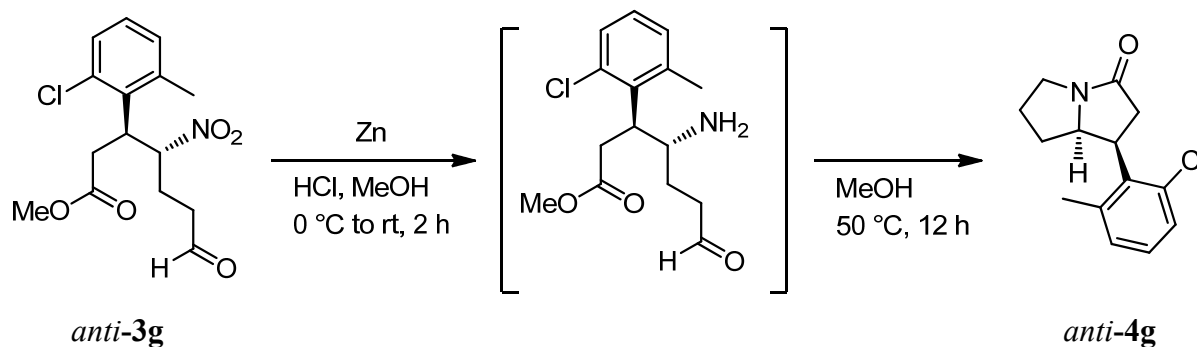

To a solution of *anti*-3*g* (26.0 mg, 0.08 mmol) in conc. aqueous HCl–MeOH (1:1 v/v, 0.4 mL) was slowly added zinc powder (104.0 mg, 1.6 mmol, 20 equiv) over three portions at 0 °C. The resulting mixture was stirred and gradually warmed up to ambient temperature over 2 h until the completion of the reaction, as monitored by TLC. The reaction mixture was filtered, and the filtrate was neutralized to *ca.* pH = 8 by the addition of NaHCO<sub>3</sub>. The solution was extracted with EtOAc (10 mL x 3) and washed with brine (10 mL). The organic extract was dried over MgSO<sub>4</sub> and concentrated *in vacuo* to give a yellow oil residue. A solution of the residue in MeOH (1.0 mL) was heated to 50 °C for 12 h until the completion of the reaction, as monitored by TLC. The solution was concentrated *in vacuo*, and the residue was purified by flash column chromatography with 80% EtOAc–hexane ( $R_f$  = 0.28 for *anti*-4*g* in EtOAc) to afford the product *anti*-4*g* (13.1 mg, 66% yield) as a white solid.

Selected data of *anti*-4*g*: mp: 93–94 °C;  $[\alpha]_D^{25}$  139.4 (*c* 0.56, CH<sub>2</sub>Cl<sub>2</sub>); <sup>1</sup>H NMR (500 MHz, CDCl<sub>3</sub>): δ 7.22 – 7.19 (m, 1 H), 7.06 – 7.02 (m, 2 H), 4.34 – 4.29 (m, 2 H), 3.58 – 3.52 (m, 1 H), 3.19 – 3.12 (m, 2 H), 2.97 (d, *J* = 17.5 Hz, 1 H), 2.33 (s, 3 H), 2.16 – 2.10 (m, 1 H), 2.07 – 1.96 (m, 1 H), 1.44 – 1.39 (m, 1 H), 1.27 – 1.20 (m, 1 H); <sup>13</sup>C NMR (125 MHz, CDCl<sub>3</sub>): δ 174.2 (C), 138.8 (C), 136.9 (C), 134.6 (C), 129.7 (CH), 128.9 (CH), 127.7 (CH), 64.4 (CH), 41.4 (CH<sub>2</sub>), 40.3 (CH<sub>2</sub>), 35.6 (CH), 26.8 (CH<sub>2</sub>), 26.5 (CH<sub>2</sub>), 22.0 (CH<sub>3</sub>).

## Preparation of

**(1*S*,7*aS*)-1-(3-bromo-4-methoxyphenyl)tetrahydro-1*H*-pyrrolizin-3(2*H*)-one (*syn*-4*h*)**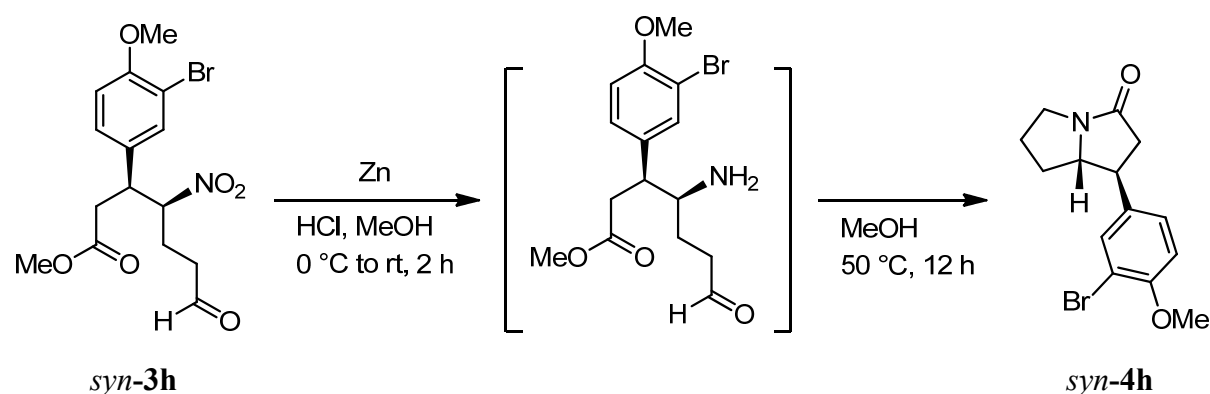

To a solution of *syn*-3*h* (16.0 mg, 0.04 mmol) in conc. aqueous HCl–MeOH (1:1 v/v, 0.2 mL) was slowly added zinc powder (53.6 mg, 0.82 mmol, 20 equiv) over three portions at 0 °C. The resulting mixture was stirred and gradually warmed up to ambient temperature over 2 h until the completion of the reaction, as monitored by TLC. The reaction mixture was filtered, and the filtrate was neutralized to *ca.* pH = 8 by the addition of NaHCO<sub>3</sub>. The solution was extracted with EtOAc (10 mL x 3) and washed with brine (10 mL). The organic extract was dried over MgSO<sub>4</sub> and concentrated *in vacuo* to give a yellow oil residue. A solution of the residue in MeOH (1.0 mL) was heated to 50 °C for 12 h until the completion of the reaction, as monitored by TLC. The solution was concentrated *in vacuo*, and the residue was purified by flash column chromatography with 80% EtOAc–hexane ( $R_f = 0.48$  for *syn*-4*h* in EtOAc) to afford the product *syn*-4*h* (7.3 mg, 57% yield) as a yellow solid.

Selected data of *syn*-4*h*: mp: 107 – 108 °C;  $[\alpha]_D^{27} -30.6$  ( $c$  0.36, CH<sub>2</sub>Cl<sub>2</sub>); IR (neat): 2965, 2924, 2852, 1691, 1500, 1408, 1287, 1259, 1181, 1092, 1055, 1018, 881, 814 cm<sup>-1</sup>; <sup>1</sup>H NMR (500 MHz, CDCl<sub>3</sub>):  $\delta$  7.42 (d,  $J = 2.5$  Hz, 1 H), 7.14 (dd,  $J = 8.5, 2.5$  Hz, 1 H), 6.85 (d,  $J = 8.5$  Hz, 1 H), 3.87 (s, 3 H), 3.90 – 3.85 (m, 1 H), 3.63 – 3.57 (m, 1 H), 3.21 – 3.16 (m, 1 H), 3.12 – 3.07 (m, 1 H), 2.89 (dd,  $J = 16.5, 12.0$  Hz, 1 H), 2.77 (dd,  $J = 16.5, 8.5$  Hz, 1 H), 2.15 – 1.99 (m, 3 H), 1.55 – 1.48 (m, 1 H); <sup>13</sup>C NMR (125 MHz, CDCl<sub>3</sub>):  $\delta$  172.9 (C), 155.0 (C), 134.1 (C), 131.9 (CH), 127.0 (CH), 112.1 (CH), 112.0 (C), 68.7 (CH), 56.3 (CH<sub>3</sub>), 47.5 (CH), 43.2 (CH<sub>2</sub>), 41.4 (CH<sub>2</sub>), 31.3 (CH<sub>2</sub>), 27.0 (CH<sub>2</sub>); MS ( $m/z$ , relative intensity): 309 (M<sup>+</sup>, 2), 213 (4), 198 (7), 187 (13), 142 (8), 91 (52), 80 (63), 57 (100); exact mass calculated for C<sub>14</sub>H<sub>16</sub>O<sub>2</sub>NBr (M<sup>+</sup>) 309.0364; found: 309.0361.



## Preparation of

**(1*S*,7*aR*)-1-(3-bromo-4-methoxyphenyl)tetrahydro-1*H*-pyrrolizin-3(2*H*)-one (*anti*-4*h*)**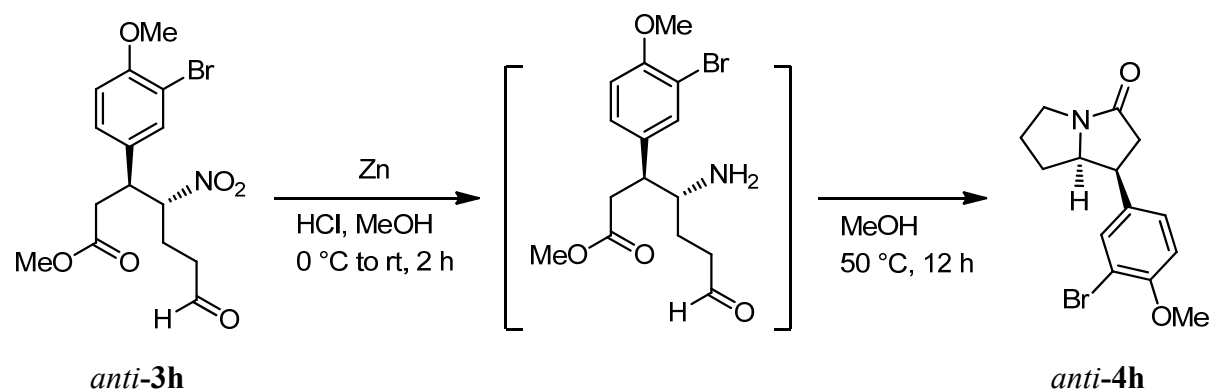

To a solution of *anti*-3*h* (10.0 mg, 0.03 mmol) in conc. aqueous HCl–MeOH (1:1 v/v, 0.15 mL) was slowly added zinc powder (34.0 mg, 0.52 mmol, 20 equiv) over three portions at 0 °C. The resulting mixture was stirred and gradually warmed up to ambient temperature over 2 h until the completion of the reaction, as monitored by TLC. The reaction mixture was filtered, and the filtrate was neutralized to *ca.* pH = 8 by the addition of NaHCO<sub>3</sub>. The solution was extracted with EtOAc (10 mL x 3) and washed with brine (10 mL). The organic extract was dried over MgSO<sub>4</sub> and concentrated *in vacuo* to give a yellow oil residue. A solution of the residue in MeOH (1.0 mL) was heated to 50 °C for 12 h until the completion of the reaction, as monitored by TLC. The solution was concentrated *in vacuo*, and the residue was purified by flash column chromatography with 80% EtOAc–hexane ( $R_f = 0.42$  for *anti*-4*h* in EtOAc) to afford the product *anti*-4*h* (5.1 mg, 64% yield) as a yellow solid.

Selected data of *anti*-4*h*: mp: 170 °C (decomposed);  $[\alpha]_D^{27}$  127.5 (*c* 0.17, CH<sub>2</sub>Cl<sub>2</sub>); <sup>1</sup>H NMR (500 MHz, CDCl<sub>3</sub>):  $\delta$  7.27 (s, 1 H), 6.99 (d,  $J = 8.5$  Hz, 1 H), 6.82 (d,  $J = 8.5$  Hz, 1 H), 4.23 – 4.18 (m, 1 H), 3.86 (s, 3 H), 3.61 – 3.58 (m, 1 H), 3.53 – 3.47 (m, 1 H), 3.15 (dd,  $J = 17.0, 8.5$  Hz, 1 H), 3.08 – 3.03 (m, 1 H), 2.57 (d,  $J = 17.0$  Hz, 1 H), 1.94 – 1.88 (m, 1 H), 1.86 – 1.82 (m, 1 H), 1.52 – 1.49 (m, 1 H), 1.00 – 0.99 (m, 1 H); <sup>13</sup>C NMR (125 MHz, CDCl<sub>3</sub>):  $\delta$  173.9 (C), 154.9 (C), 134.2 (C), 132.8 (CH), 127.2 (CH), 112.0 (CH), 111.8 (C), 65.9 (CH), 56.3 (CH<sub>3</sub>), 41.6 (CH<sub>2</sub>), 41.4 (CH<sub>2</sub>), 40.7 (CH), 26.8 (CH<sub>2</sub>), 26.4 (CH<sub>2</sub>).

## Preparation of

**(1*S*,7*aS*)-1-(3-bromo-6-fluoro-2-methoxyphenyl)tetrahydro-1*H*-pyrrolizin-3(2*H*)-one**  
**(*syn*-4*i*)**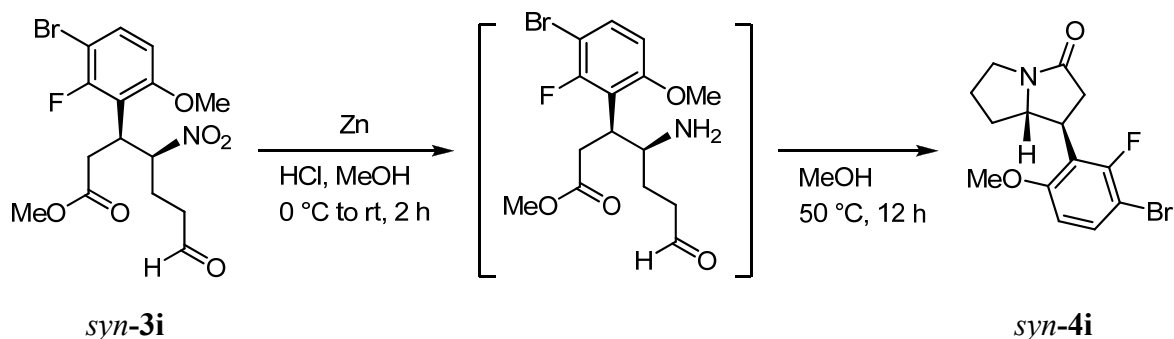

To a solution of *syn*-3*i* (22.0 mg, 0.05 mmol) in conc. aqueous HCl–MeOH (1:1 v/v, 0.25 mL) was slowly added zinc powder (70.6 mg, 1.08 mmol, 20 equiv) over three portions at 0 °C. The resulting mixture was stirred and gradually warmed up to ambient temperature over 2 h until the completion of the reaction, as monitored by TLC. The reaction mixture was filtered, and the filtrate was neutralized to *ca.* pH = 8 by the addition of NaHCO<sub>3</sub>. The solution was extracted with EtOAc (10 mL x 3) and washed with brine (10 mL). The organic extract was dried over MgSO<sub>4</sub> and concentrated *in vacuo* to give a yellow oil residue. A solution of the residue in MeOH (1.0 mL) was heated to 50 °C for 12 h until the completion of the reaction, as monitored by TLC. The solution was concentrated *in vacuo*, and the residue was purified by flash column chromatography with 80% EtOAc–hexane ( $R_f = 0.48$  for *syn*-4*i* in EtOAc) to afford the product *syn*-4*i* (10.7 mg, 60% yield) as a yellow oil.

Selected data of *syn*-4*i*:  $[\alpha]_D^{27} -33.2$  ( $c$  0.96, CH<sub>2</sub>Cl<sub>2</sub>); IR (neat): 2947, 2841, 1690, 1602, 1573, 1478, 1440, 1412, 1365, 1282, 1224, 1167, 1075, 802 cm<sup>-1</sup>; <sup>1</sup>H NMR (500 MHz, CDCl<sub>3</sub>):  $\delta$  7.37 (dd,  $J = 9.0, 8.0$  Hz, 1 H), 6.59 (dd,  $J = 9.0, 1.0$  Hz, 1 H), 4.12 – 4.09 (m, 1 H), 3.82 (s, 3 H), 3.76 – 3.70 (m, 1 H), 3.63 – 3.58 (m, 1 H), 3.28 (dd,  $J = 16.5, 11.5$  Hz, 1 H), 3.11 – 3.07 (m, 1 H), 2.58 (dd,  $J = 16.5, 9.0$  Hz, 1 H), 2.11 – 2.09 (m, 1 H), 2.02 – 1.93 (m, 2 H), 1.45 – 1.41 (m, 1 H); <sup>13</sup>C NMR (125 MHz, CDCl<sub>3</sub>):  $\delta$  173.8 (C), 157.5 (d,  $J = 243.1$  Hz, C), 158.0 (d,  $J = 6.9$  Hz, C), 131.5 (d,  $J = 2.3$  Hz, CH), 117.3 (d,  $J = 16.5$  Hz, C), 107.9 (d,  $J = 3.1$  Hz, CH), 100.6 (d,  $J = 22.9$  Hz, C), 65.5 (d,  $J = 2.8$  Hz, CH), 56.0 (CH<sub>3</sub>), 41.5 (CH<sub>2</sub>), 40.2 (d,  $J = 2.3$  Hz, CH<sub>2</sub>), 37.5 (d,  $J = 1.4$  Hz, CH), 31.6 (CH<sub>2</sub>), 26.8 (CH<sub>2</sub>); MS ( $m/z$ , relative intensity): 329 (M<sup>+</sup>+2, 35), 327 (M<sup>+</sup>, 36), 232 (46), 230 (49), 217 (15), 215 (15), 136 (75), 108 (16), 107 (18), 70 (100); exact mass calculated for C<sub>14</sub>H<sub>15</sub>O<sub>2</sub>NBrF (M<sup>+</sup>) 327.0270; found: 327.0267.



### One-pot Synthesis of tetrahydro-1*H*-pyrrolizin-3(2*H*)-one (*syn*-**4a** and *anti*-**4a**)

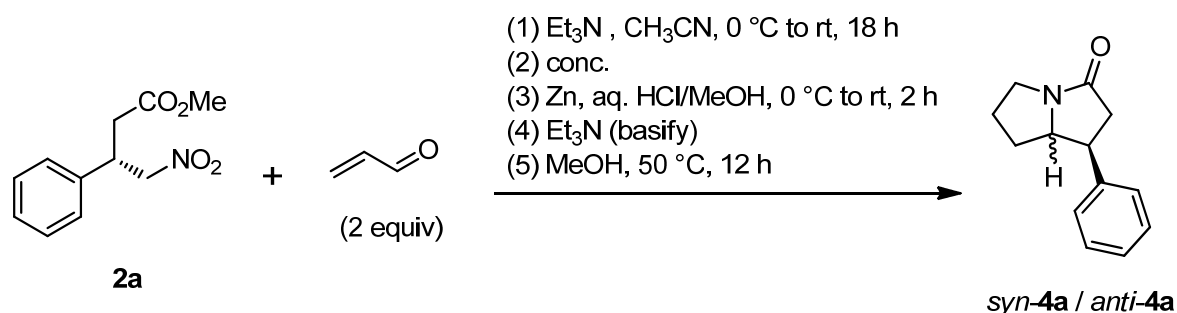

To a solution of **2a** (22.3 mg, 0.1 mmol) and Et<sub>3</sub>N (10.1 mg, 0.1 mmol, 1 equiv) in CH<sub>3</sub>CN (0.9 mL) was added a solution of acrylaldehyde (11.2 mg, 0.2 mmol, 2.0 equiv) in CH<sub>3</sub>CN (0.1 mL) at 0 °C. The resulting solution was stirred at room temperature for 18 h until the completion of the reaction, as monitored by TLC. The reaction solution was concentrated *in vacuo* to give the yellow oil residue. To the crude product was added a solution of conc. aqueous HCl–MeOH (1:1 v/v, 0.2 mL). To the solution was slowly added zinc powder (130.6 mg, 2.0 mmol, 20 equiv) over three portions at 0 °C. The resulting mixture was stirred and gradually warmed up to ambient temperature over 2 h until the completion of the reaction, as monitored by TLC. The solution was cooled to 0 °C and was basified by the addition of Et<sub>3</sub>N. To the solution was added MeOH (1.0 mL), and the mixture was heated to 50 °C for 12 h until the completion of the reaction, as monitored by TLC. The solution was concentrated *in vacuo*, and the residue was purified by flash column chromatography with 80% EtOAc–hexane to afford the product *syn*-**4a** and *anti*-**4a** (11.5 mg, 57% yield) as a colorless oil. Further separation by HPLC [ZORBAX SIL column 4.6 mm x 250 mm, elute: *n*-hexane/*i*-PrOH/MeOH = 50:40:10, detector: 254 nm, flow rate: 0.5 mL/min), t<sub>1</sub> = 10.77 min (*syn*-**4a**), t<sub>2</sub> = 13.17 min (*anti*-**4a**) or ZORBAX SIL column 9.4 mm x 250 mm, elute: *n*-hexane/*i*-PrOH/MeOH = 50:40:10, detector: 254 nm, flow rate: 4.0 mL/min), t<sub>1</sub> = 6.09 min (*syn*-**4a**), t<sub>2</sub> = 7.95 min (*anti*-**4a**)] gave 7.8 mg of *syn*-**4a** (39% yield) and 2.4 mg of *anti*-**4a** (12% yield).

### One-pot Synthesis of tetrahydro-1*H*-pyrrolizin-3(2*H*)-one *syn*-**4d** and *anti*-**4d**

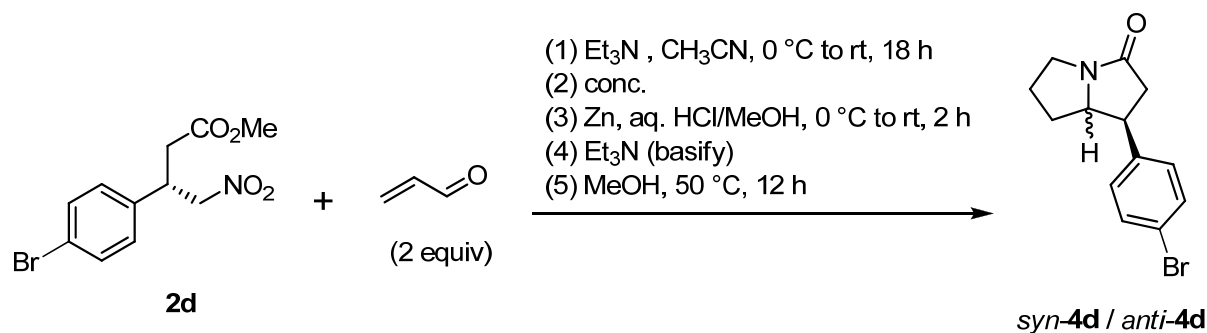

To a solution of **2d** (30.2 mg, 0.1 mmol) and Et<sub>3</sub>N (10.1 mg, 0.1 mmol, 1 equiv) in CH<sub>3</sub>CN (0.9 mL) was added a solution of acrylaldehyde (11.2 mg, 0.2 mmol, 2.0 equiv) in CH<sub>3</sub>CN (0.1 mL) at 0 °C. The resulting solution was stirred at room temperature for 18 h until the completion of the reaction, as monitored by TLC. The reaction solution was concentrated *in vacuo* to give the yellow oil residue. To the crude product was added a solution of conc. aqueous HCl–MeOH (1:1 v/v, 0.2 mL). To the solution was slowly added zinc powder (130.6 mg, 2.0 mmol, 20 equiv) over three portions at 0 °C. The resulting mixture was stirred and gradually warmed up to ambient temperature over 2 h until the completion of the reaction, as monitored by TLC. The solution was cooled to 0 °C and was basified by the addition of Et<sub>3</sub>N. To the solution was added MeOH (1.0 mL), and the mixture was heated to 50 °C for 12 h until the completion of the reaction, as monitored by TLC. The solution was concentrated *in vacuo*, and the residue was purified by flash column chromatography with 80% EtOAc–hexane to afford the product *syn*-**4d** and *anti*-**4d** (15.8 mg, 56% yield) as a colorless oil.

### One-pot Synthesis of tetrahydro-1*H*-pyrrolizin-3(2*H*)-one *syn*-4*h* and *anti*-4*h*

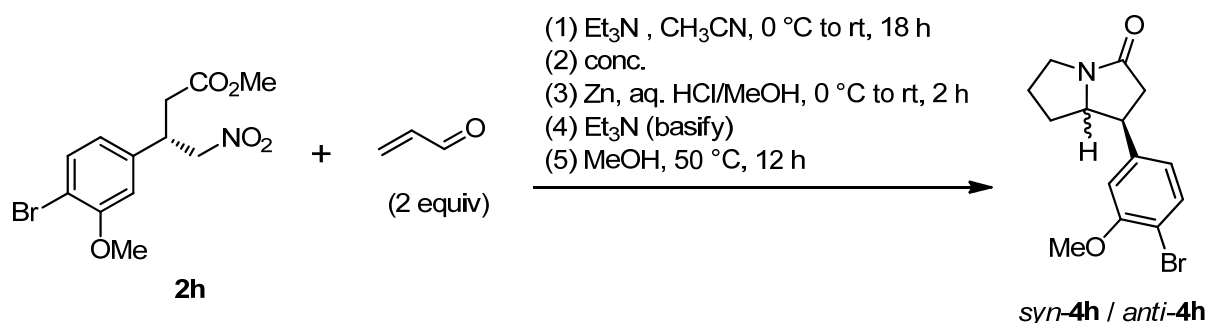

To a solution of **2h** (33.2 mg, 0.1 mmol) and Et<sub>3</sub>N (10.1 mg, 0.1 mmol, 1 equiv) in CH<sub>3</sub>CN (0.9 mL) was added a solution of acrylaldehyde (11.2 mg, 0.2 mmol, 2.0 equiv) in CH<sub>3</sub>CN (0.1 mL) at 0 °C. The resulting solution was stirred at room temperature for 18 h until the completion of the reaction, as monitored by TLC. The reaction solution was concentrated *in vacuo* to give the yellow oil residue. To the crude product was added a solution of conc. aqueous HCl–MeOH (1:1 v/v, 0.2 mL). To the solution was slowly added zinc powder (130.6 mg, 2.0 mmol, 20 equiv) over three portions at 0 °C. The resulting mixture was stirred and gradually warmed up to ambient temperature over 2 h until the completion of the reaction, as monitored by TLC. The solution was cooled to 0 °C and was basified by the addition of Et<sub>3</sub>N. To the solution was added MeOH (1.0 mL), and the mixture was heated to 50 °C for 12 h until the completion of the reaction, as monitored by TLC. The solution was concentrated *in vacuo*, and the residue was purified by flash column chromatography with 80% EtOAc–hexane to afford the product *syn*-4*h* and *anti*-4*h* (16.4 mg, 53% yield) as a colorless oil.

Fig S43. <sup>1</sup>H NMR (CDCl<sub>3</sub>, 400 MHz) of compound 2a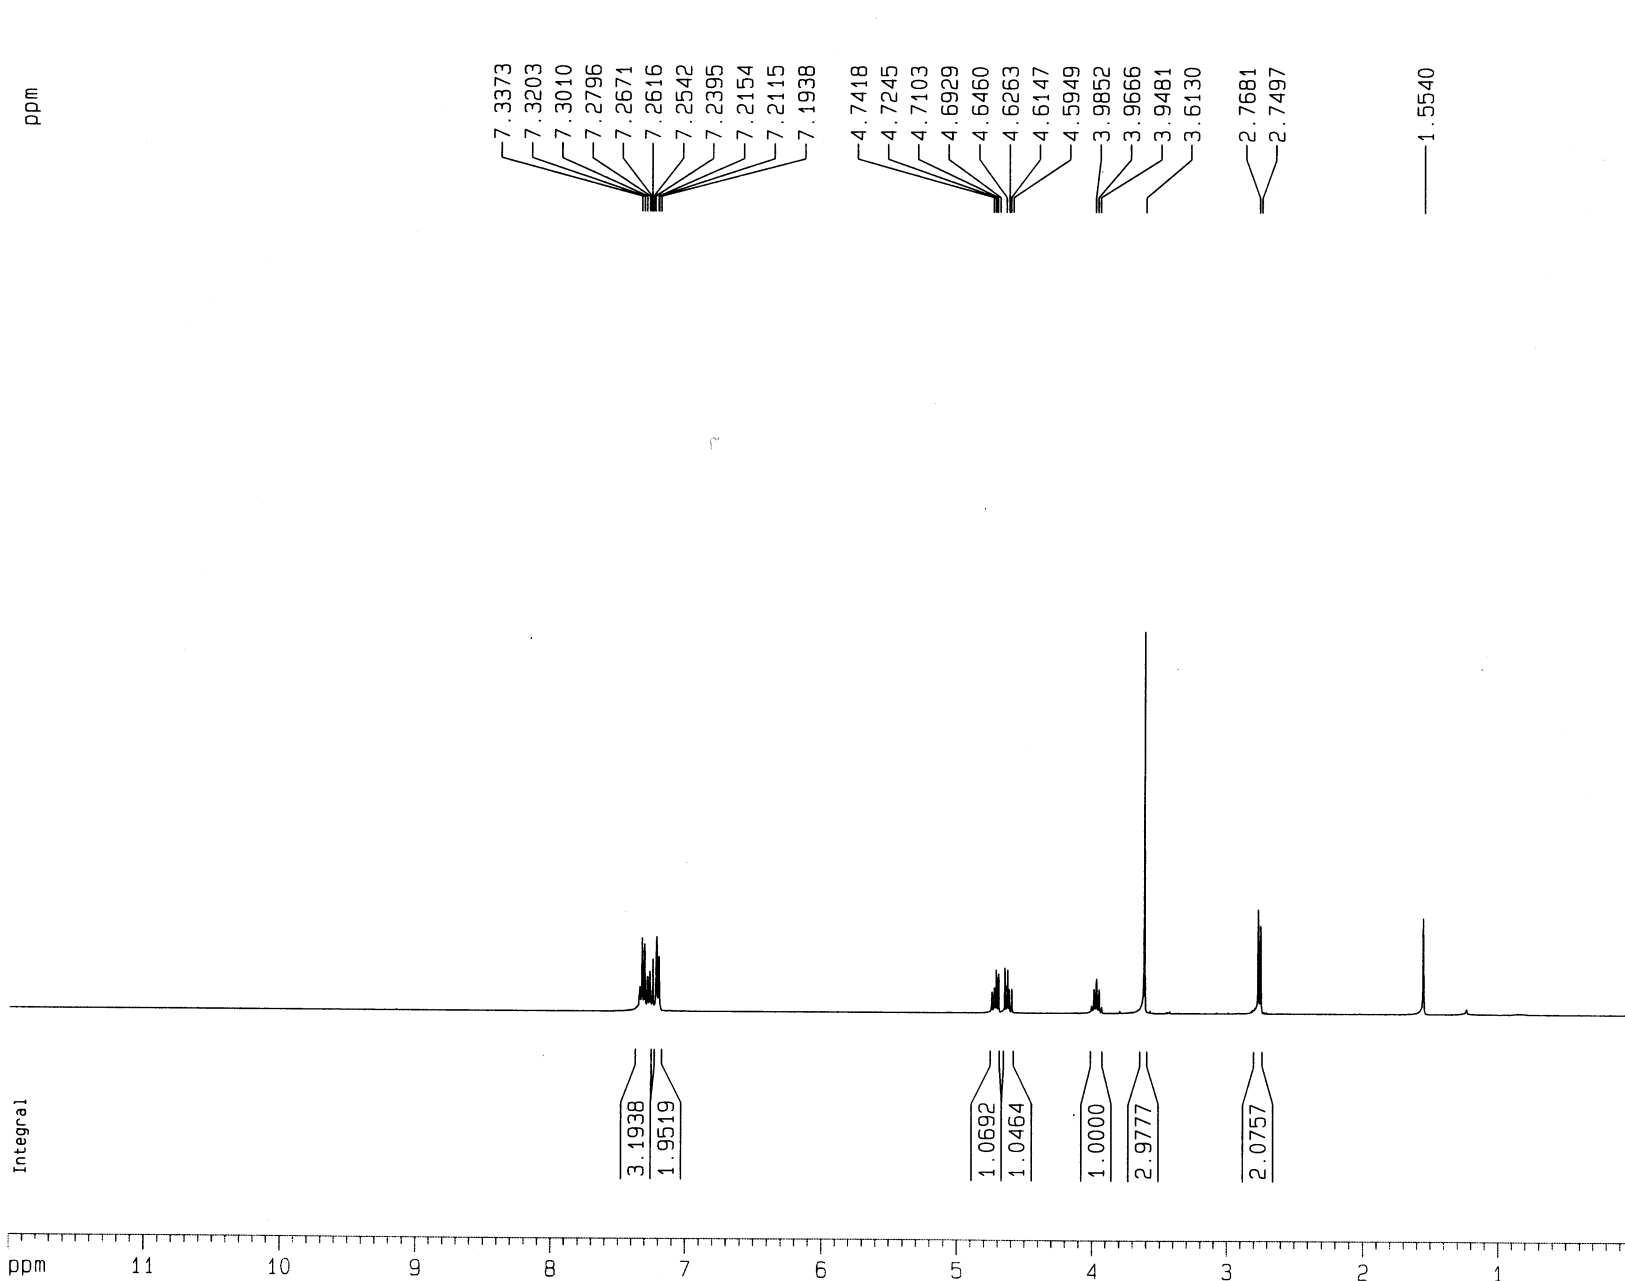

Current Data Parameters  
 NAME LCH-2-269  
 EXPNO 1  
 PROCNO 1

F2 - Acquisition Parameters  
 Date\_ 20141208  
 Time 17.18  
 INSTRUM spect  
 PROBHD 5 mm QNP 1H  
 PULPROG zg30  
 TD 16384  
 SOLVENT CDCl3  
 NS 16  
 DS 0  
 SWH 5995.204 Hz  
 FIDRES 0.365918 Hz  
 AQ 1.3664756 sec  
 RG 4096  
 DW 83.400 usec  
 DE 6.50 usec  
 TE 300.0 K  
 D1 1.50000000 sec

===== CHANNEL f1 =====  
 NUC1 1H  
 P1 11.90 usec  
 PL1 -3.00 dB  
 SF01 400.1326008 MHz

F2 - Processing parameters  
 SI 8192  
 SF 400.1300179 MHz  
 WDW EM  
 SSB 0  
 LB 0.10 Hz  
 GB 0  
 PC 1.00

1D NMR plot parameters  
 CX 21.50 cm  
 F1P 12.000 ppm  
 F1 4801.56 Hz  
 F2P -0.000 ppm  
 F2 -0.00 Hz  
 PPMCM 0.55814 ppm/cm  
 HZCM 223.32837 Hz/cm

## C13 spectrum of

Fig S44. <sup>13</sup>C NMR (CDCl<sub>3</sub>, 100 MHz) of compound 2a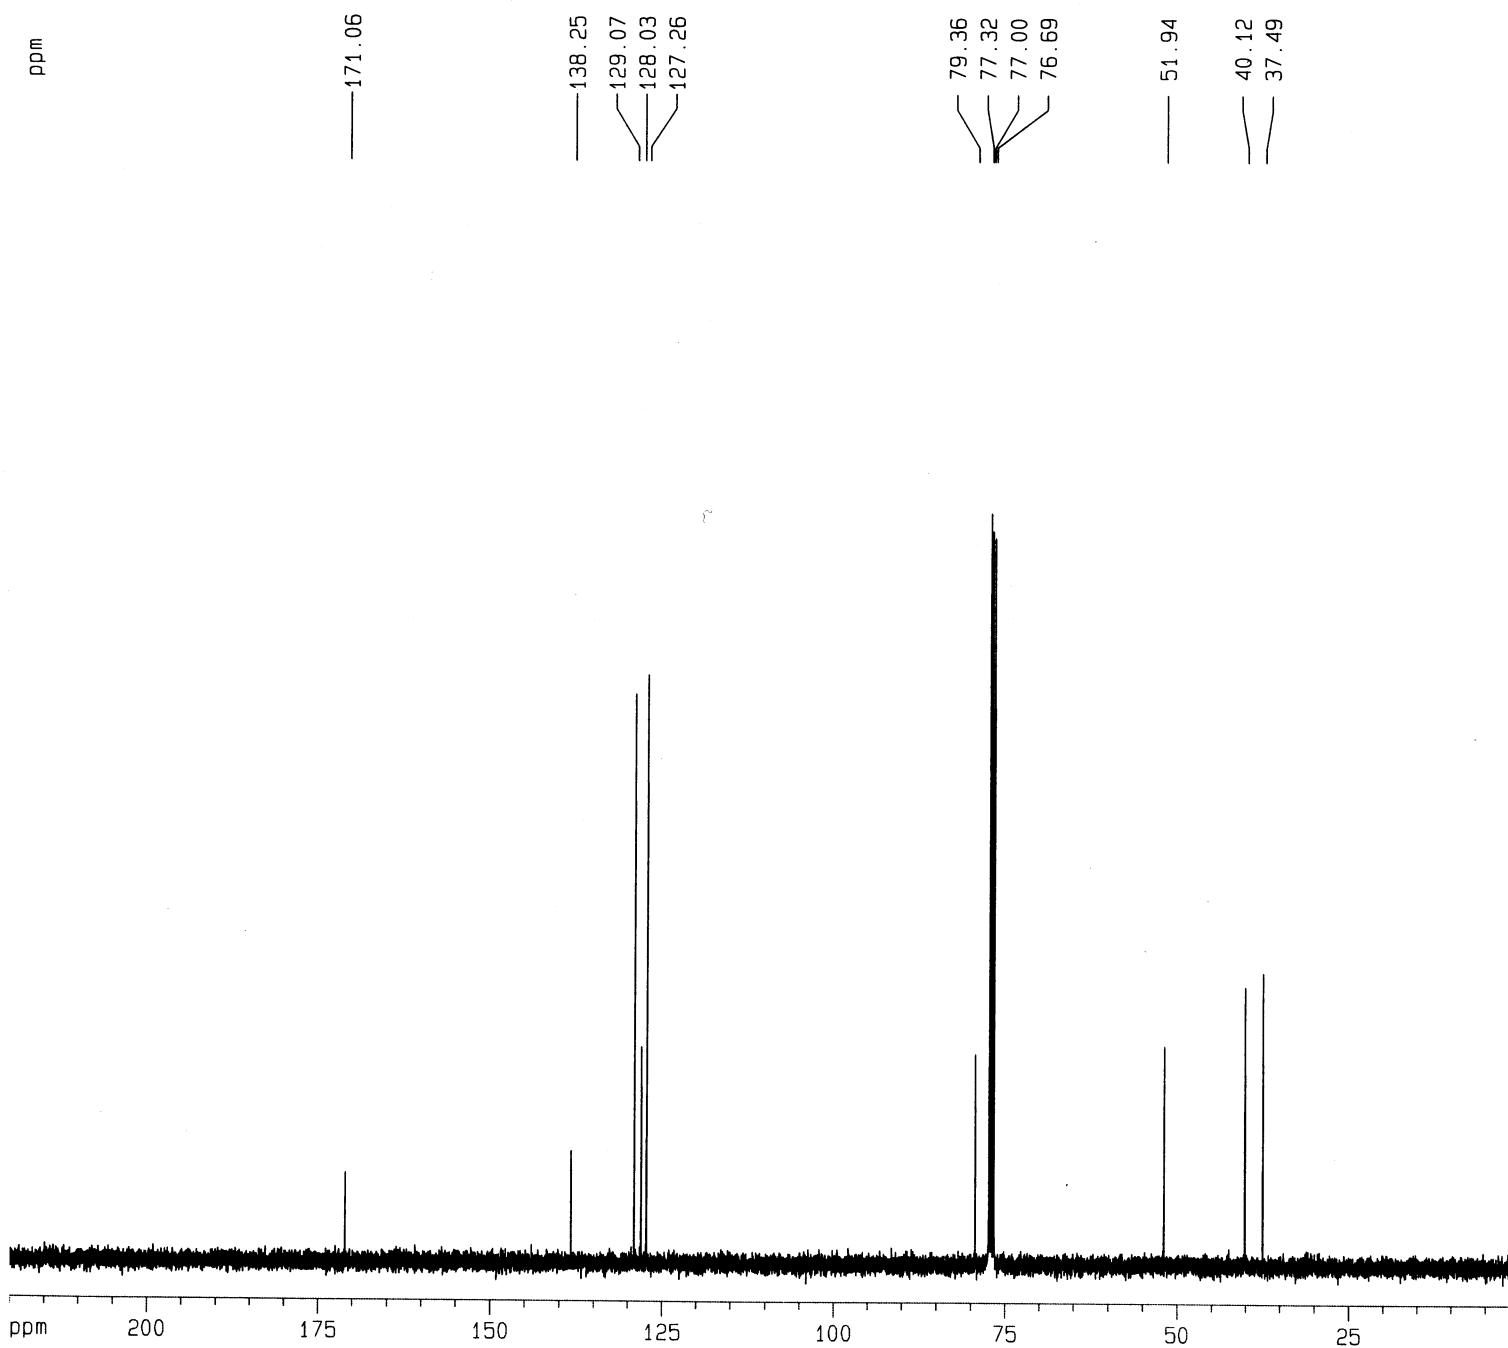

## Current Data Parameters

NAME LCH-2-269  
EXPNO 2  
PROCNO 1

## F2 - Acquisition Parameters

Date\_ 20141207  
Time 20.33  
INSTRUM spect  
PROBHD 5 mm QNP 1H  
PULPROG zgpg30  
TD 65536  
SOLVENT CDCl<sub>3</sub>  
NS 819  
DS 4  
SWH 25125.629 Hz  
FIDRES 0.383387 Hz  
AQ 1.3042164 sec  
RG 256  
DW 19.900 usec  
DE 6.50 usec  
TE 300.0 K  
D1 2.0000000 sec  
d11 0.0300000 sec  
d12 0.00002000 sec

## ===== CHANNEL f1 =====

NUC1 13C  
P1 10.20 usec  
PL1 0.00 dB  
SF01 100.6237959 MHz

## ===== CHANNEL f2 =====

CPDPRG2 waltz16  
NUC2 1H  
PCPD2 90.00 usec  
PL2 -3.00 dB  
PL12 14.50 dB  
PL13 17.50 dB  
SF02 400.1326008 MHz

## F2 - Processing parameters

SI 32768  
SF 100.6127731 MHz  
WDW EM  
SSB 0  
LB 0.30 Hz  
GB 0  
PC 1.40

## 1D NMR plot parameters

CX 20.00 cm  
F1P 220.000 ppm  
F1 22134.81 Hz  
F2P 0.000 ppm  
F2 0.00 Hz  
PPMCM 11.00000 ppm/cm  
HZCM 1106.74048 Hz/cm



Fig S45. DEPT of compound 2a

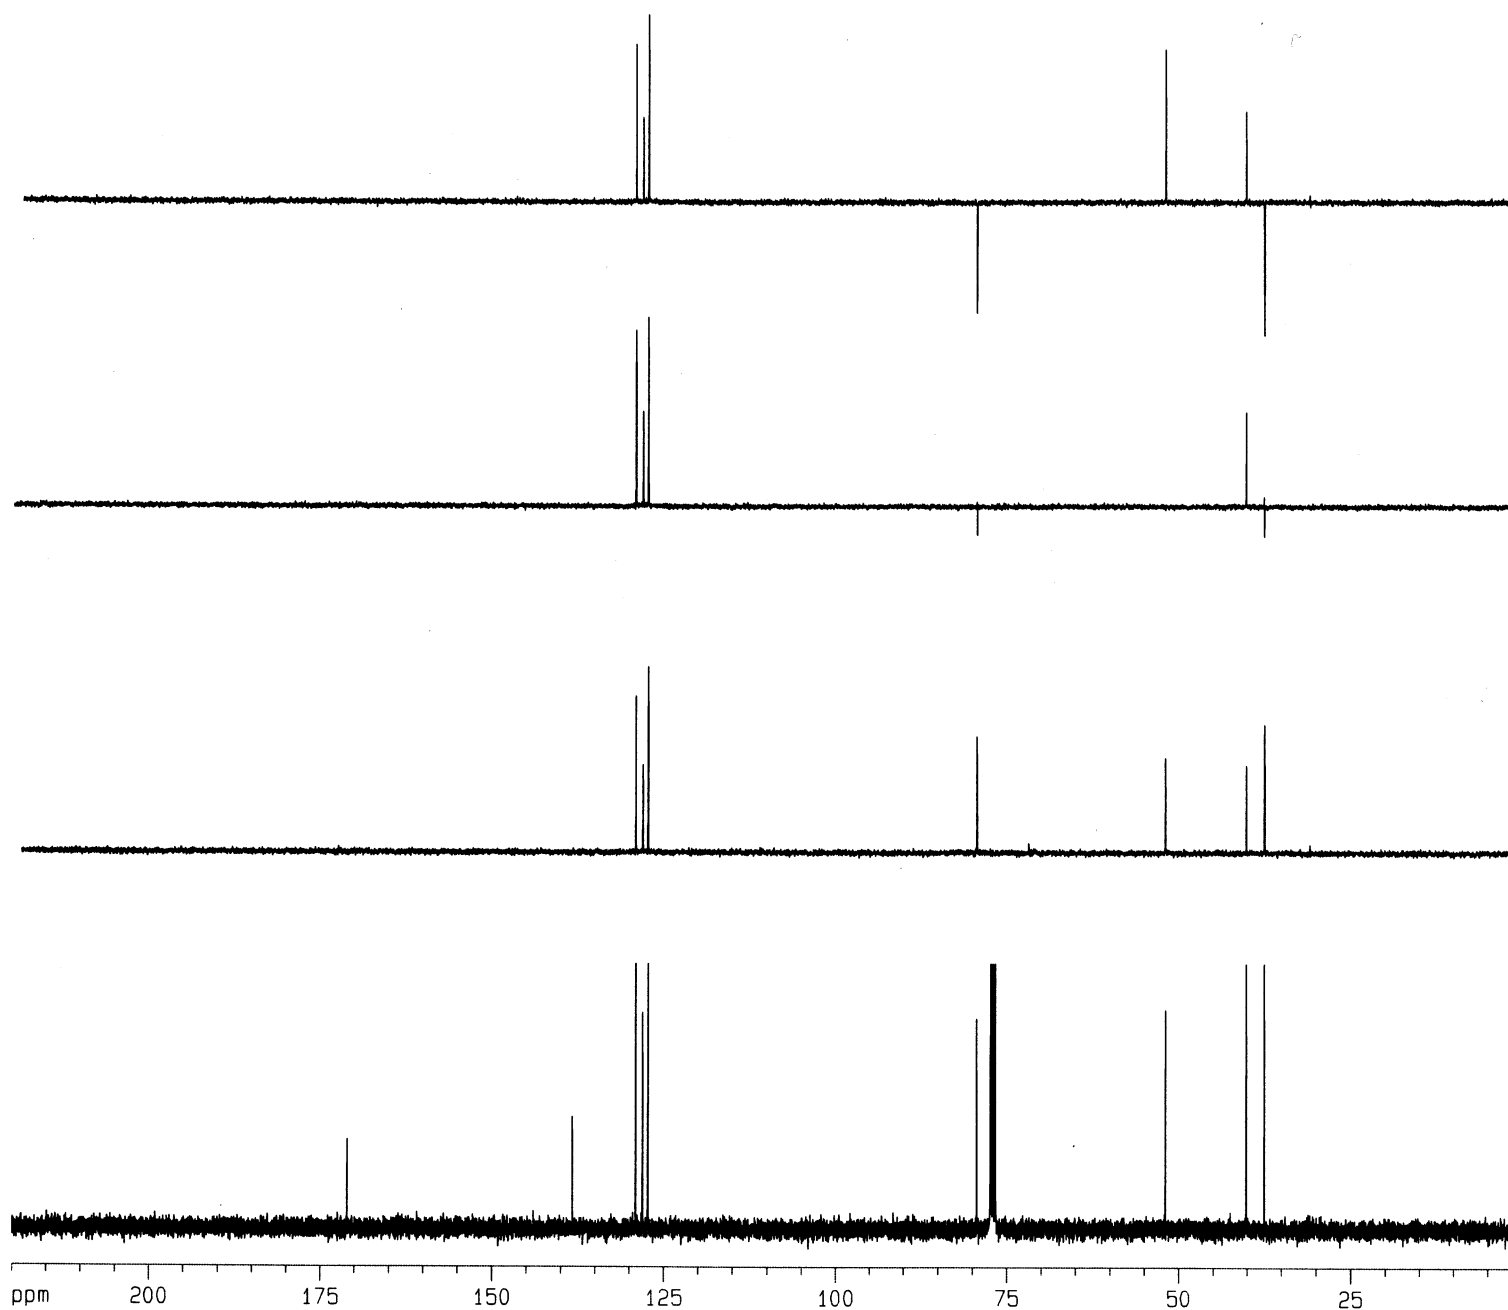

Current Data Parameters  
 NAME LCH-2-269  
 EXPNO 2  
 PROCNO 1

F2 - Acquisition Parameters  
 Date\_ 20141207  
 Time 20.33  
 INSTRUM spect  
 PROBHD 5 mm QNP 1H  
 PULPROG zgpg30  
 TD 65536  
 SOLVENT CDC13  
 NS 819  
 DS 4  
 SWH 25125.629 Hz  
 FIDRES 0.383387 Hz  
 AQ 1.3042164 sec  
 RG 256  
 DW 19.900 usec  
 DE 6.50 usec  
 TE 300.0 K  
 D1 2.0000000 sec  
 d11 0.03000000 sec  
 d12 0.00002000 sec

===== CHANNEL f1 =====  
 NUC1 13C  
 P1 10.20 usec  
 PL1 0.00 dB  
 SF01 100.6237959 MHz

===== CHANNEL f2 =====  
 CPDPRG2 waltz16  
 NUC2 1H  
 PCPD2 90.00 usec  
 PL2 -3.00 dB  
 PL12 14.50 dB  
 PL13 17.50 dB  
 SF02 400.1326008 MHz

F2 - Processing parameters  
 SI 32768  
 SF 100.6127731 MHz  
 WDW EM  
 SSB 0  
 LB 0.30 Hz  
 GB 0  
 PC 1.40

1D NMR plot parameters  
 CX 20.00 cm  
 F1P 220.000 ppm  
 F1 22134.81 Hz  
 F2P 0.000 ppm  
 F2 0.00 Hz  
 PPMCM 11.00000 ppm/cm  
 HZCM 1106.74048 Hz/cm

Fig S46. <sup>1</sup>H NMR (CDCl<sub>3</sub>, 400 MHz) of compound 2b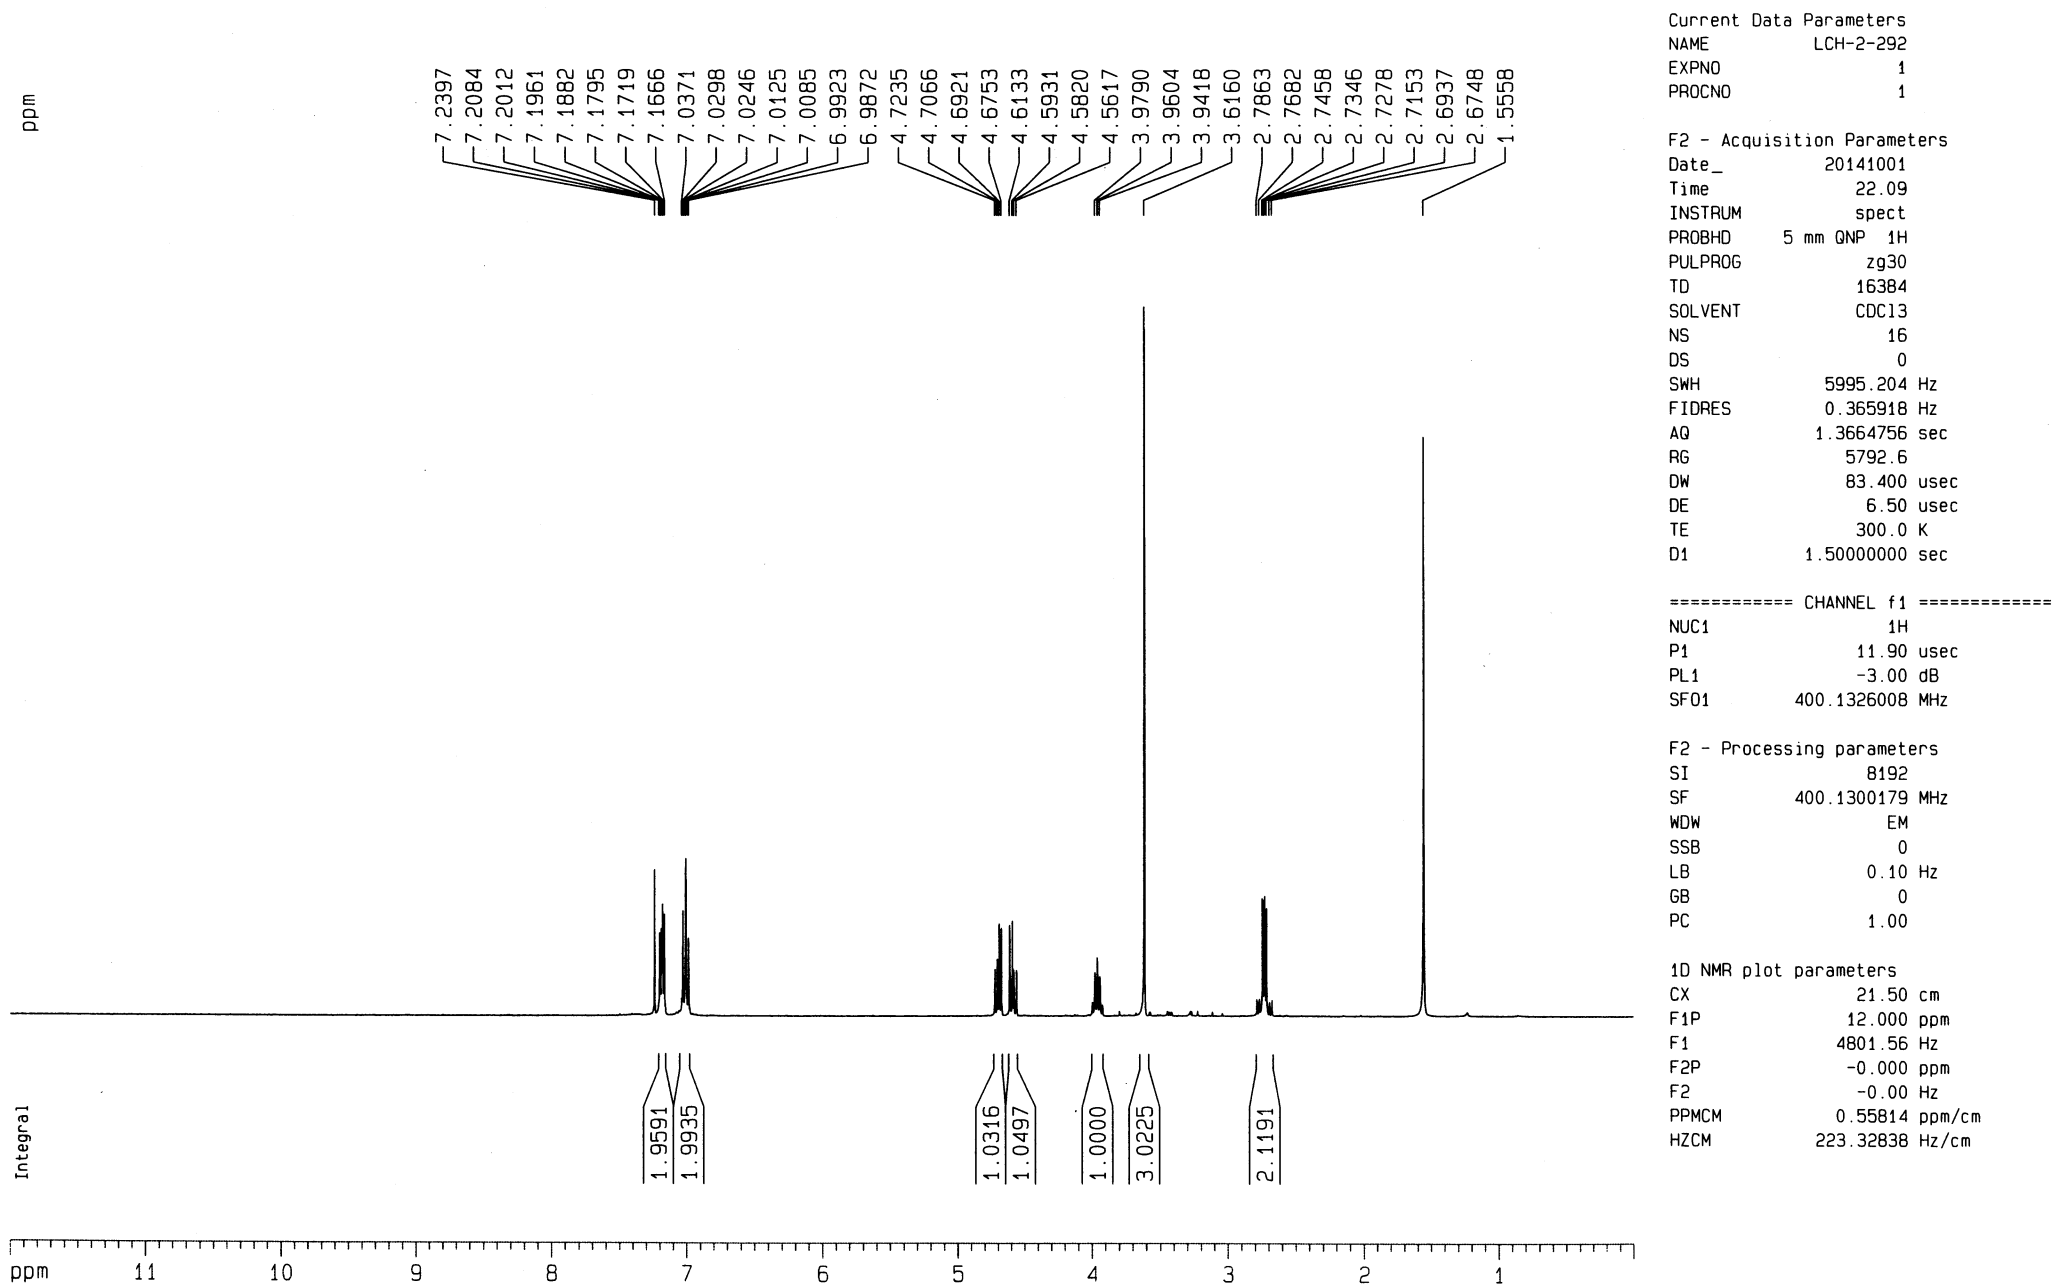

C13 spectrum of  
Fig S47. 13C NMR (CDCl3, 100 MHz) of compound 2b

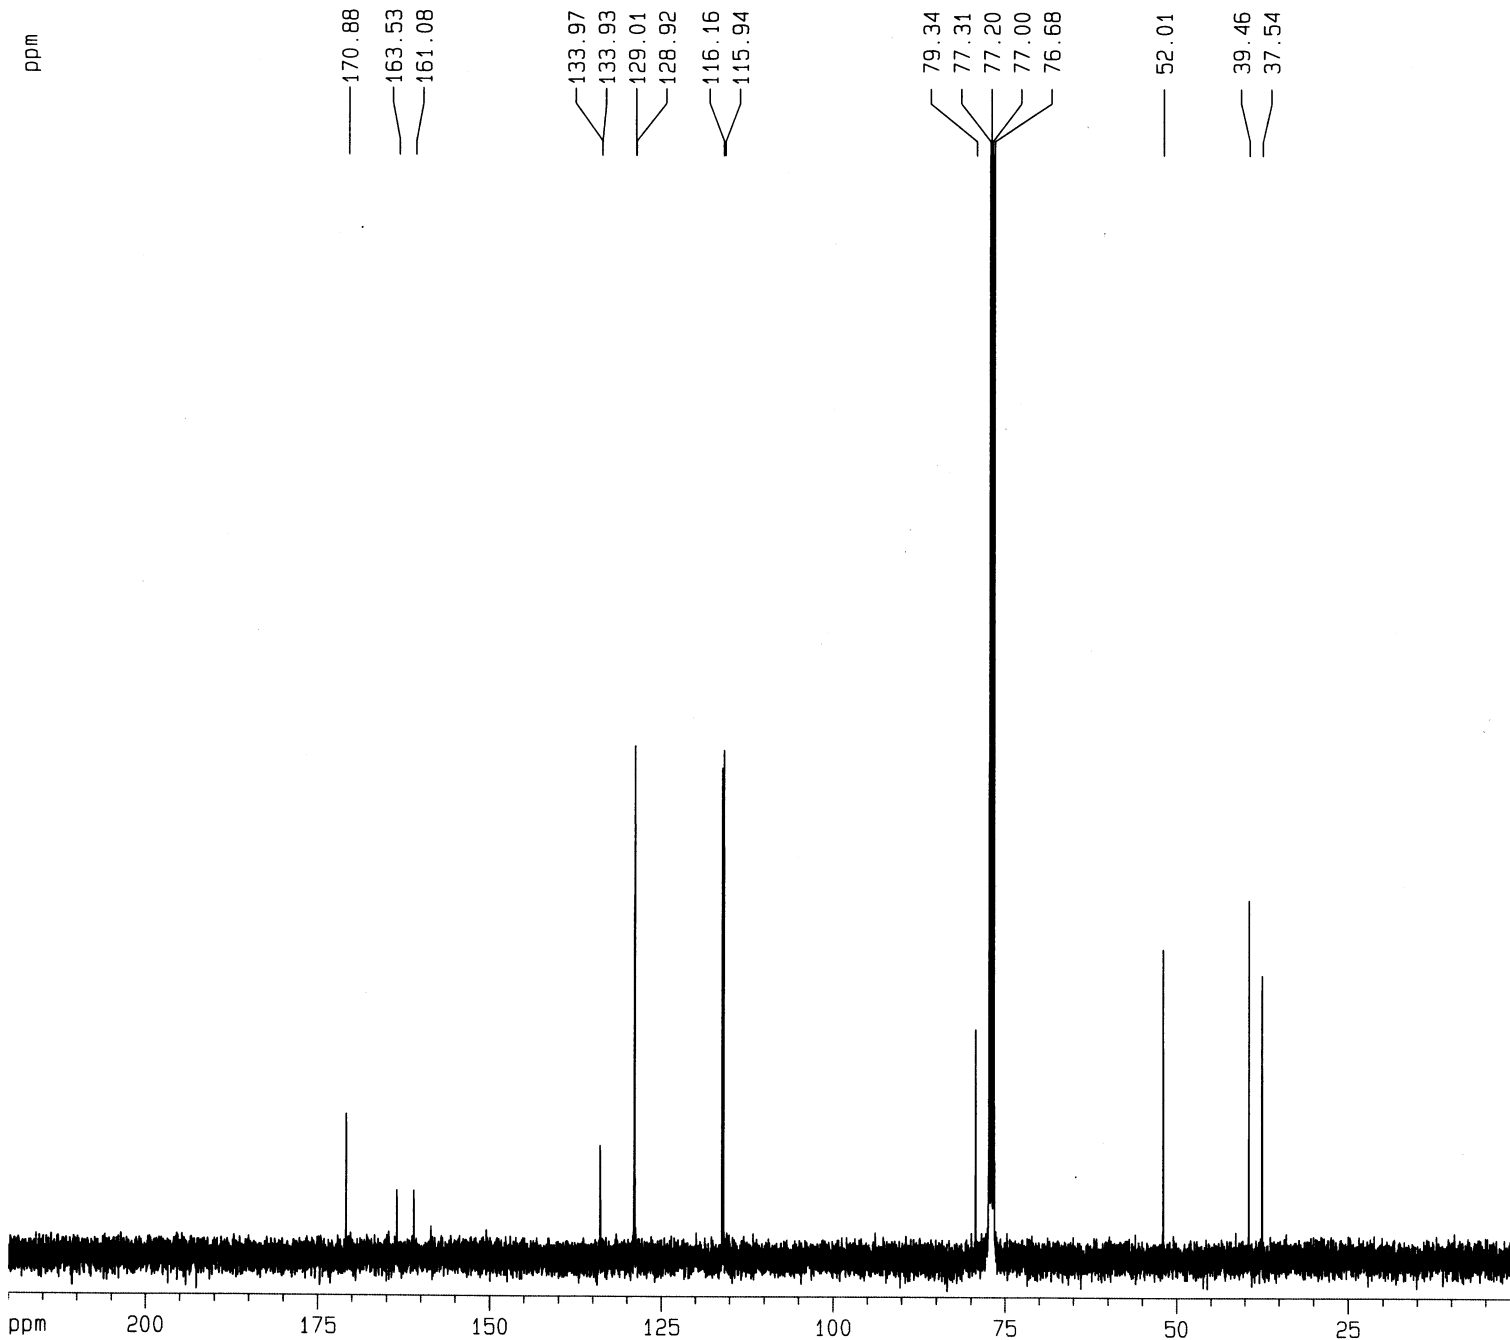

Current Data Parameters  
NAME LCH-2-292  
EXPNO 3  
PROCNO 1

F2 - Acquisition Parameters  
Date\_ 20141003  
Time 2.43  
INSTRUM spect  
PROBHD 5 mm QNP 1H  
PULPROG zgpg30  
TD 65536  
SOLVENT CDC13  
NS 3072  
DS 4  
SWH 25125.629 Hz  
FIDRES 0.383387 Hz  
AQ 1.3042164 sec  
RG 256  
DW 19.900 usec  
DE 6.50 usec  
TE 300.0 K  
D1 2.0000000 sec  
d11 0.0300000 sec  
d12 0.00002000 sec

==== CHANNEL f1 =====  
NUC1 13C  
P1 10.20 usec  
PL1 0.00 dB  
SF01 100.6237959 MHz

==== CHANNEL f2 =====  
CPDPRG2 waltz16  
NUC2 1H  
PCPD2 90.00 usec  
PL2 -3.00 dB  
PL12 14.50 dB  
PL13 17.50 dB  
SF02 400.1326008 MHz

F2 - Processing parameters  
SI 32768  
SF 100.6127715 MHz  
WDW EM  
SSB 0  
LB 0.30 Hz  
GB 0  
PC 1.40

1D NMR plot parameters  
CX 20.00 cm  
F1P 220.000 ppm  
F1 22134.81 Hz  
F2P 0.000 ppm  
F2 0.00 Hz  
PPMCM 11.00000 ppm/cm  
HZCM 1106.74048 Hz/cm

Fig S48. DEPT of compound 2b

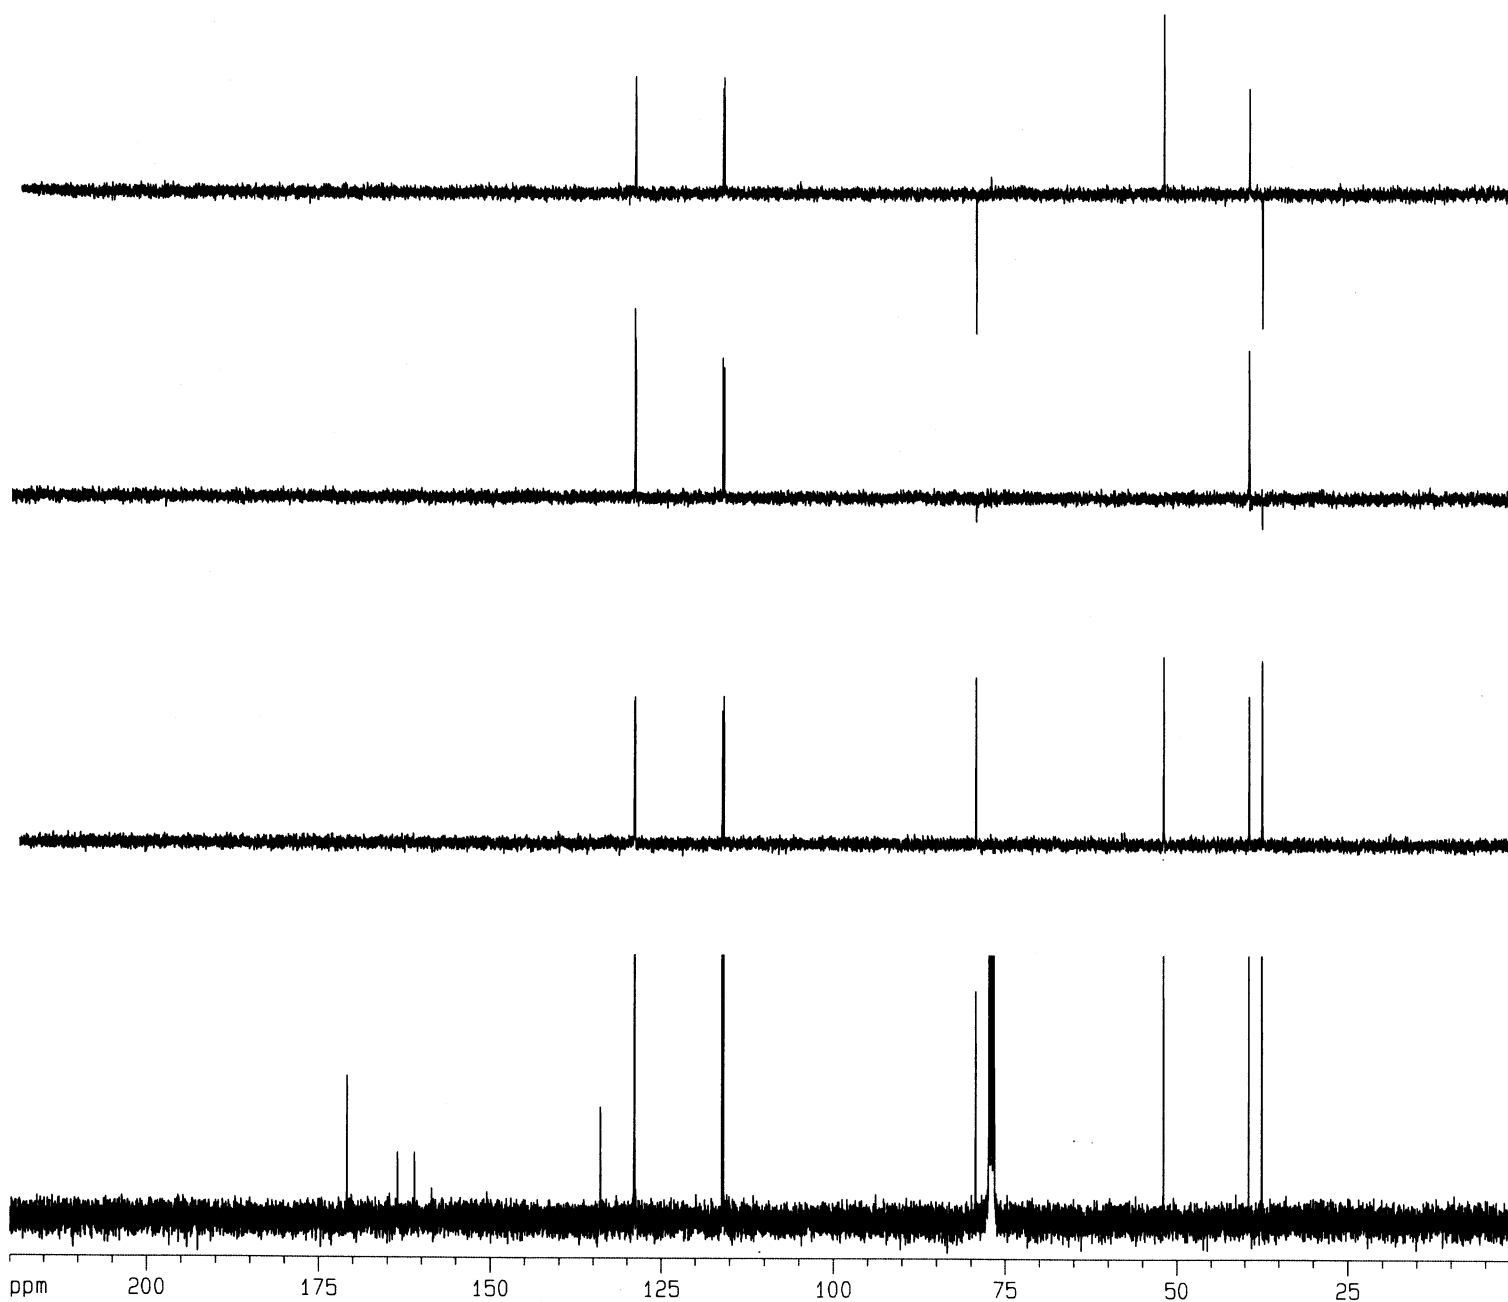

## Current Data Parameters

NAME LCH-2-292  
 EXPNO 3  
 PROCNO 1

## F2 - Acquisition Parameters

Date\_ 20141003  
 Time 2.43  
 INSTRUM spect  
 PROBHD 5 mm QNP 1H  
 PULPROG zgpg30  
 TD 65536  
 SOLVENT CDC13  
 NS 3072  
 DS 4  
 SWH 25125.629 Hz  
 FIDRES 0.383387 Hz  
 AQ 1.3042164 sec  
 RG 256  
 DW 19.900 usec  
 DE 6.50 usec  
 TE 300.0 K  
 D1 2.0000000 sec  
 d11 0.0300000 sec  
 d12 0.00002000 sec

## ===== CHANNEL f1 =====

NUC1 13C  
 P1 10.20 usec  
 PL1 0.00 dB  
 SF01 100.6237959 MHz

## ===== CHANNEL f2 =====

CPDPRG2 waltz16  
 NUC2 1H  
 PCPD2 90.00 usec  
 PL2 -3.00 dB  
 PL12 14.50 dB  
 PL13 17.50 dB  
 SF02 400.1326008 MHz

## F2 - Processing parameters

SI 32768  
 SF 100.6127715 MHz  
 WDW EM  
 SSB 0  
 LB 0.30 Hz  
 GB 0  
 PC 1.40

## 1D NMR plot parameters

CX 20.00 cm  
 F1P 220.000 ppm  
 F1 22134.81 Hz  
 F2P 0.000 ppm  
 F2 0.00 Hz  
 PPMCM 11.00000 ppm/cm  
 HZCM 1106.74048 Hz/cm

Fig S49. <sup>1</sup>H NMR (CDCl<sub>3</sub>, 400 MHz) of compound 2c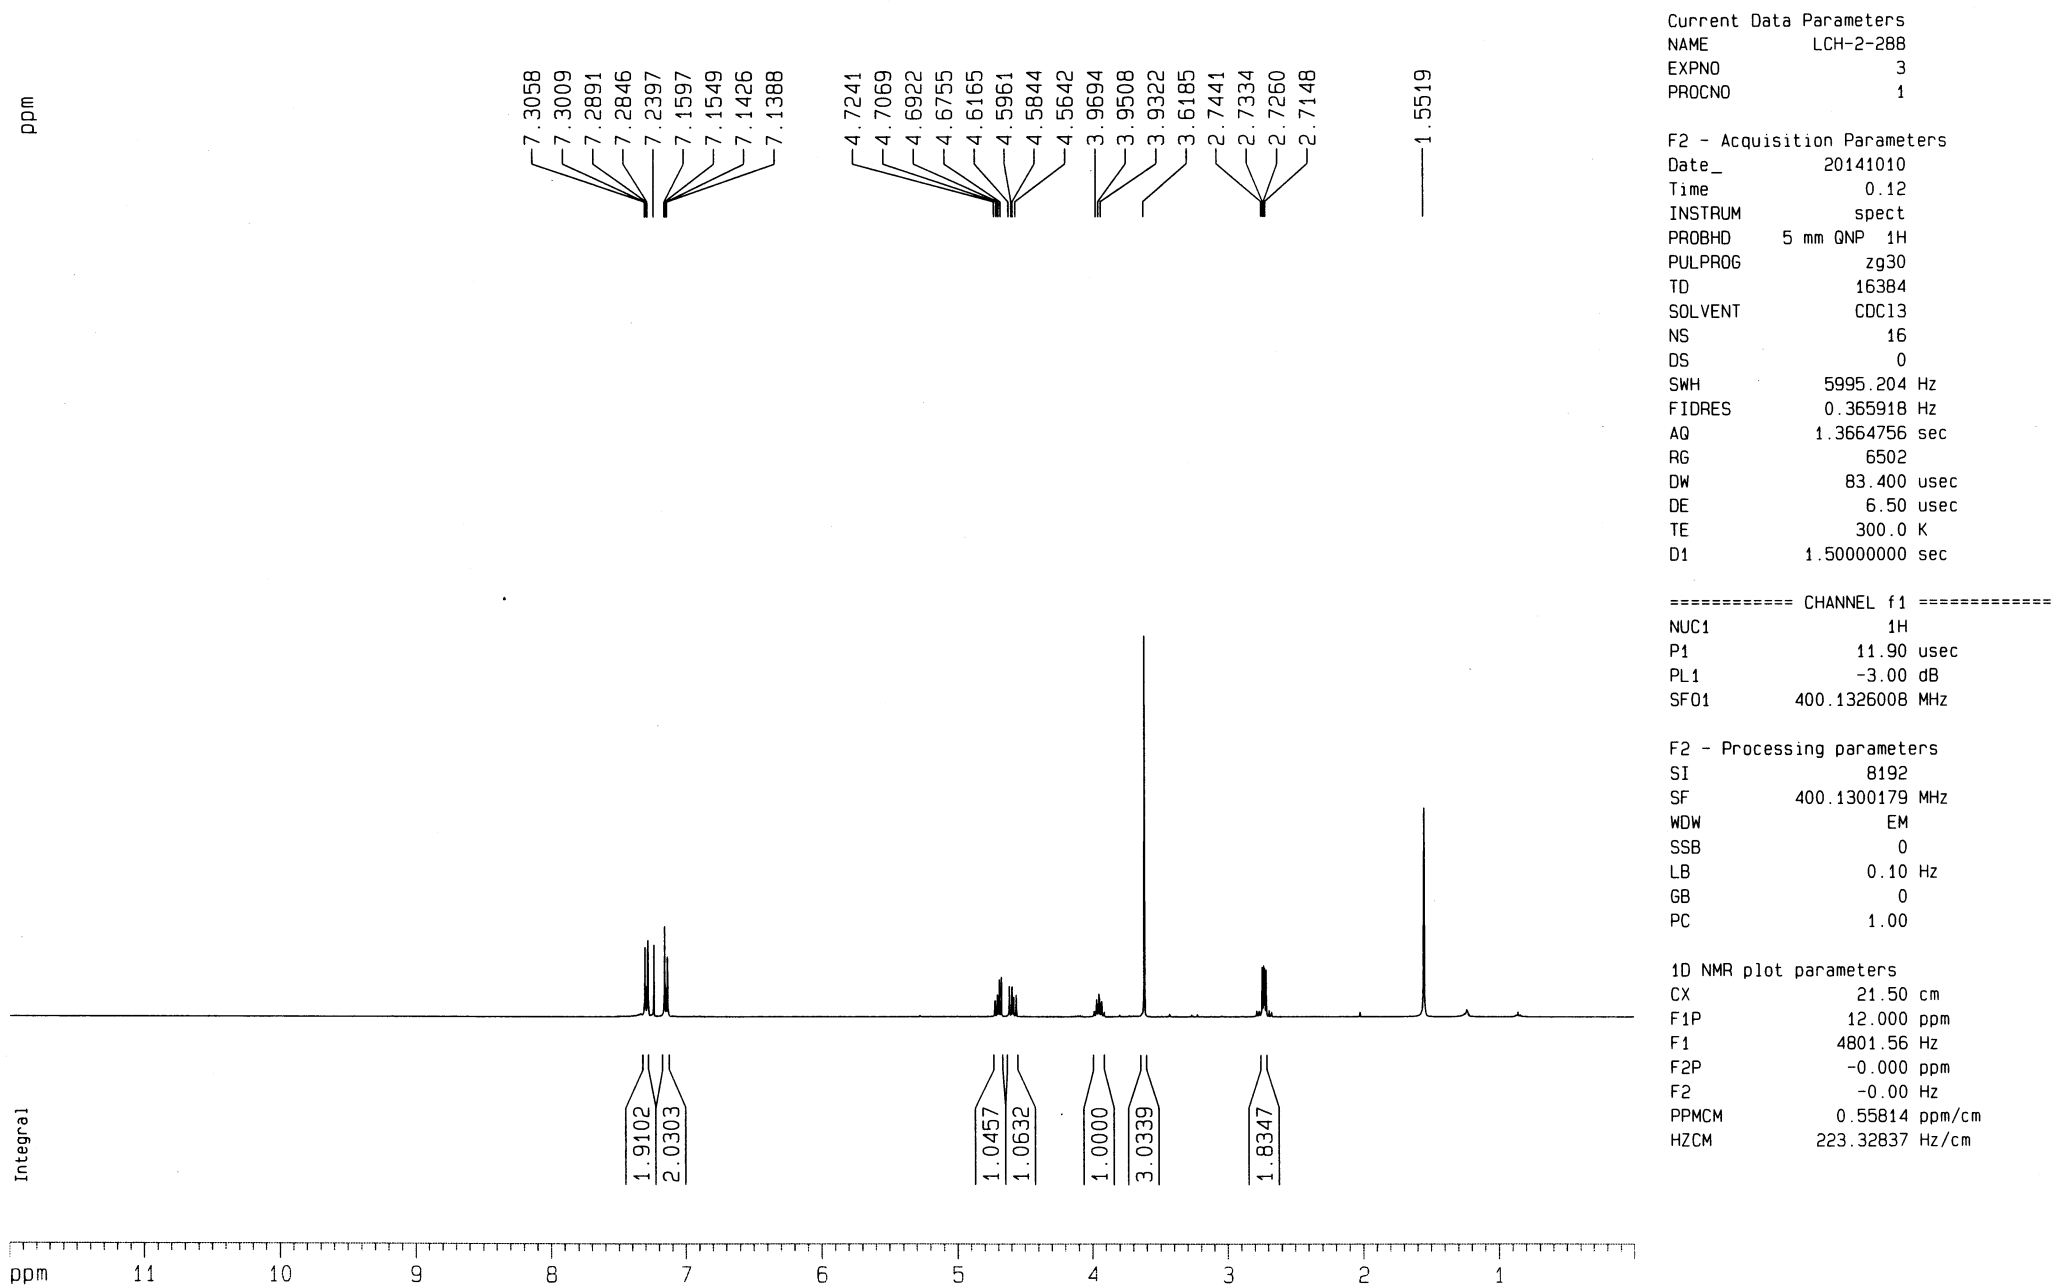

C13 spectrum of  
Fig S50. <sup>13</sup>C NMR (CDCl<sub>3</sub>, 100 MHz) of compound 2c

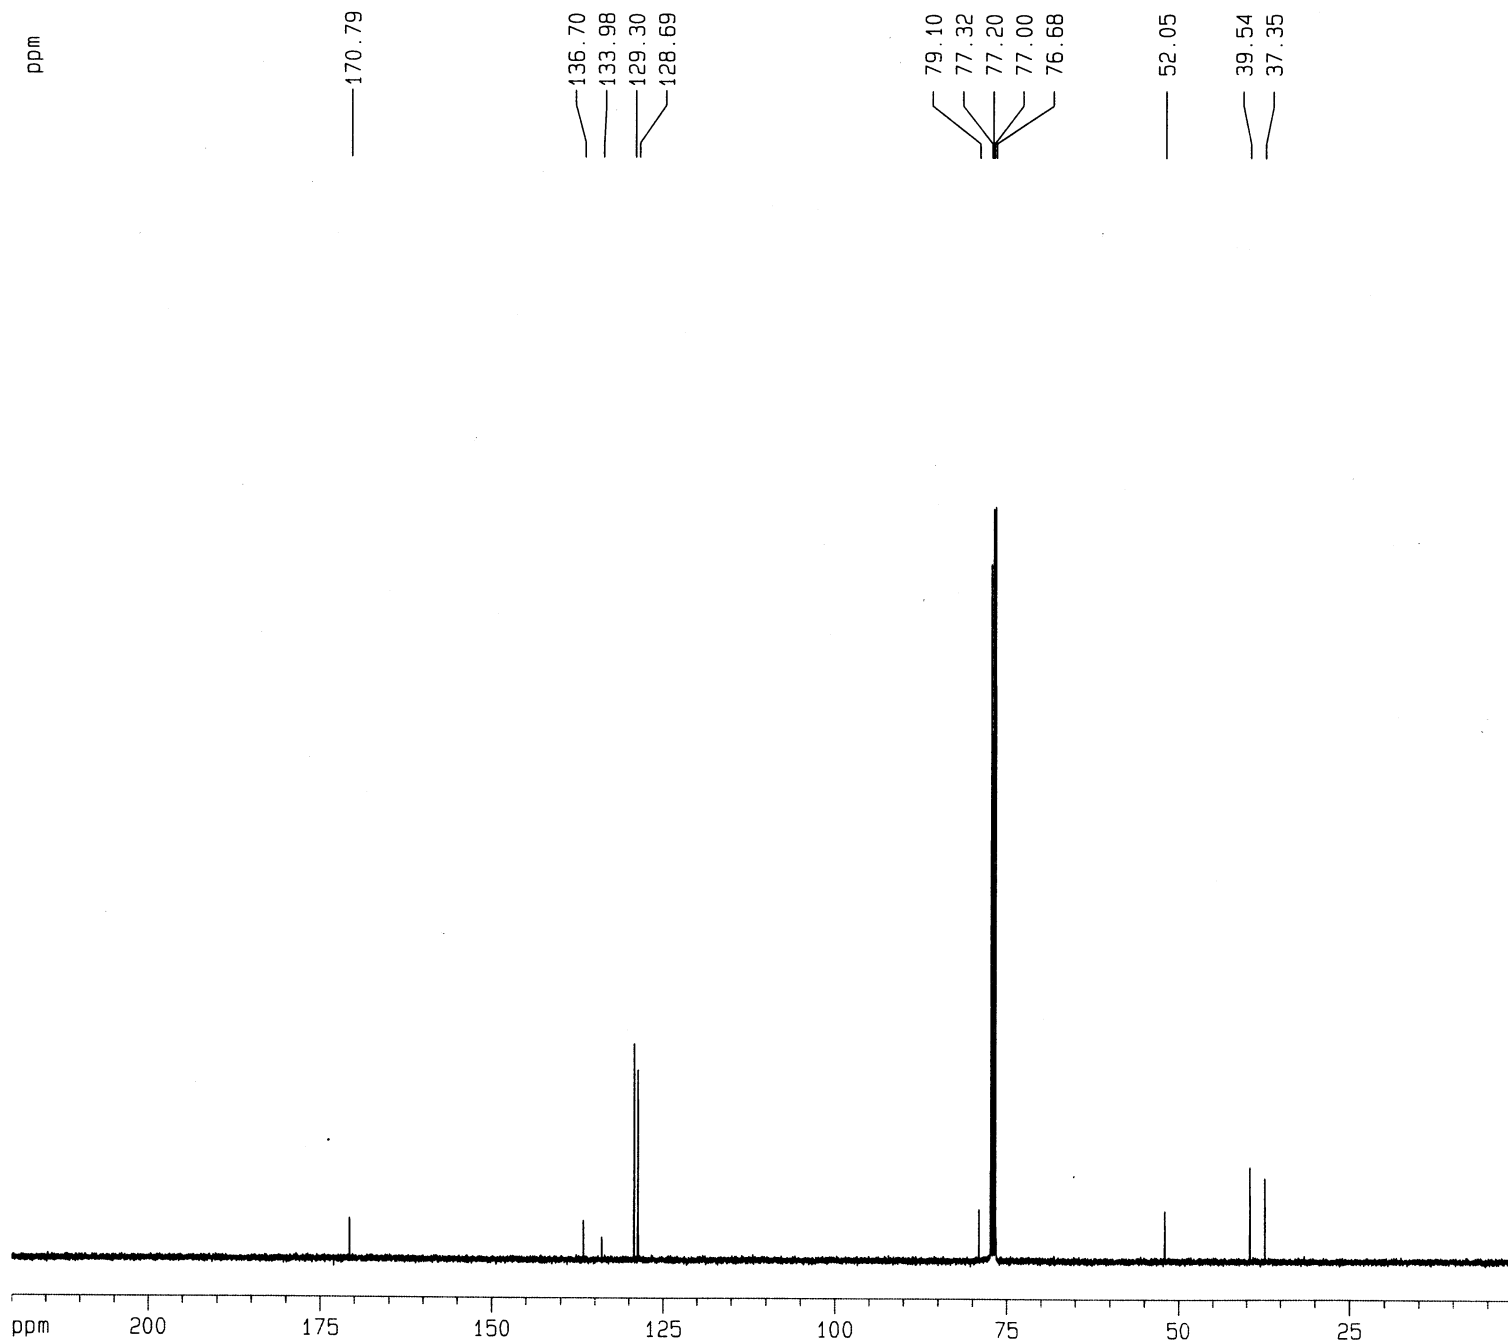

Current Data Parameters  
NAME LCH-2-288  
EXPNO 4  
PROCNO 1

F2 - Acquisition Parameters  
Date\_ 20141010  
Time 3.02  
INSTRUM spect  
PROBHD 5 mm GNP 1H  
PULPROG zgpg30  
TD 65536  
SOLVENT CDC13  
NS 3072  
DS 4  
SWH 25125.629 Hz  
FIDRES 0.383387 Hz  
AQ 1.3042164 sec  
RG 256  
DW 19.900 usec  
DE 6.50 usec  
TE 300.0 K  
D1 2.00000000 sec  
d11 0.03000000 sec  
d12 0.00002000 sec

===== CHANNEL f1 =====  
NUC1 13C  
P1 10.20 usec  
PL1 0.00 dB  
SF01 100.6237959 MHz

===== CHANNEL f2 =====  
CPDPRG2 waltz16  
NUC2 1H  
PCPD2 90.00 usec  
PL2 -3.00 dB  
PL12 14.50 dB  
PL13 17.50 dB  
SF02 400.1326008 MHz

F2 - Processing parameters  
SI 32768  
SF 100.6127715 MHz  
WDW EM  
SSB 0  
LB 0.30 Hz  
GB 0  
PC 1.40

1D NMR plot parameters  
CX 20.00 cm  
F1P 220.000 ppm  
F1 22134.81 Hz  
F2P 0.000 ppm  
F2 0.00 Hz  
PPMCM 11.00000 ppm/cm  
HZCM 1106.74048 Hz/cm

Fig S51. DEPT of compound 2c

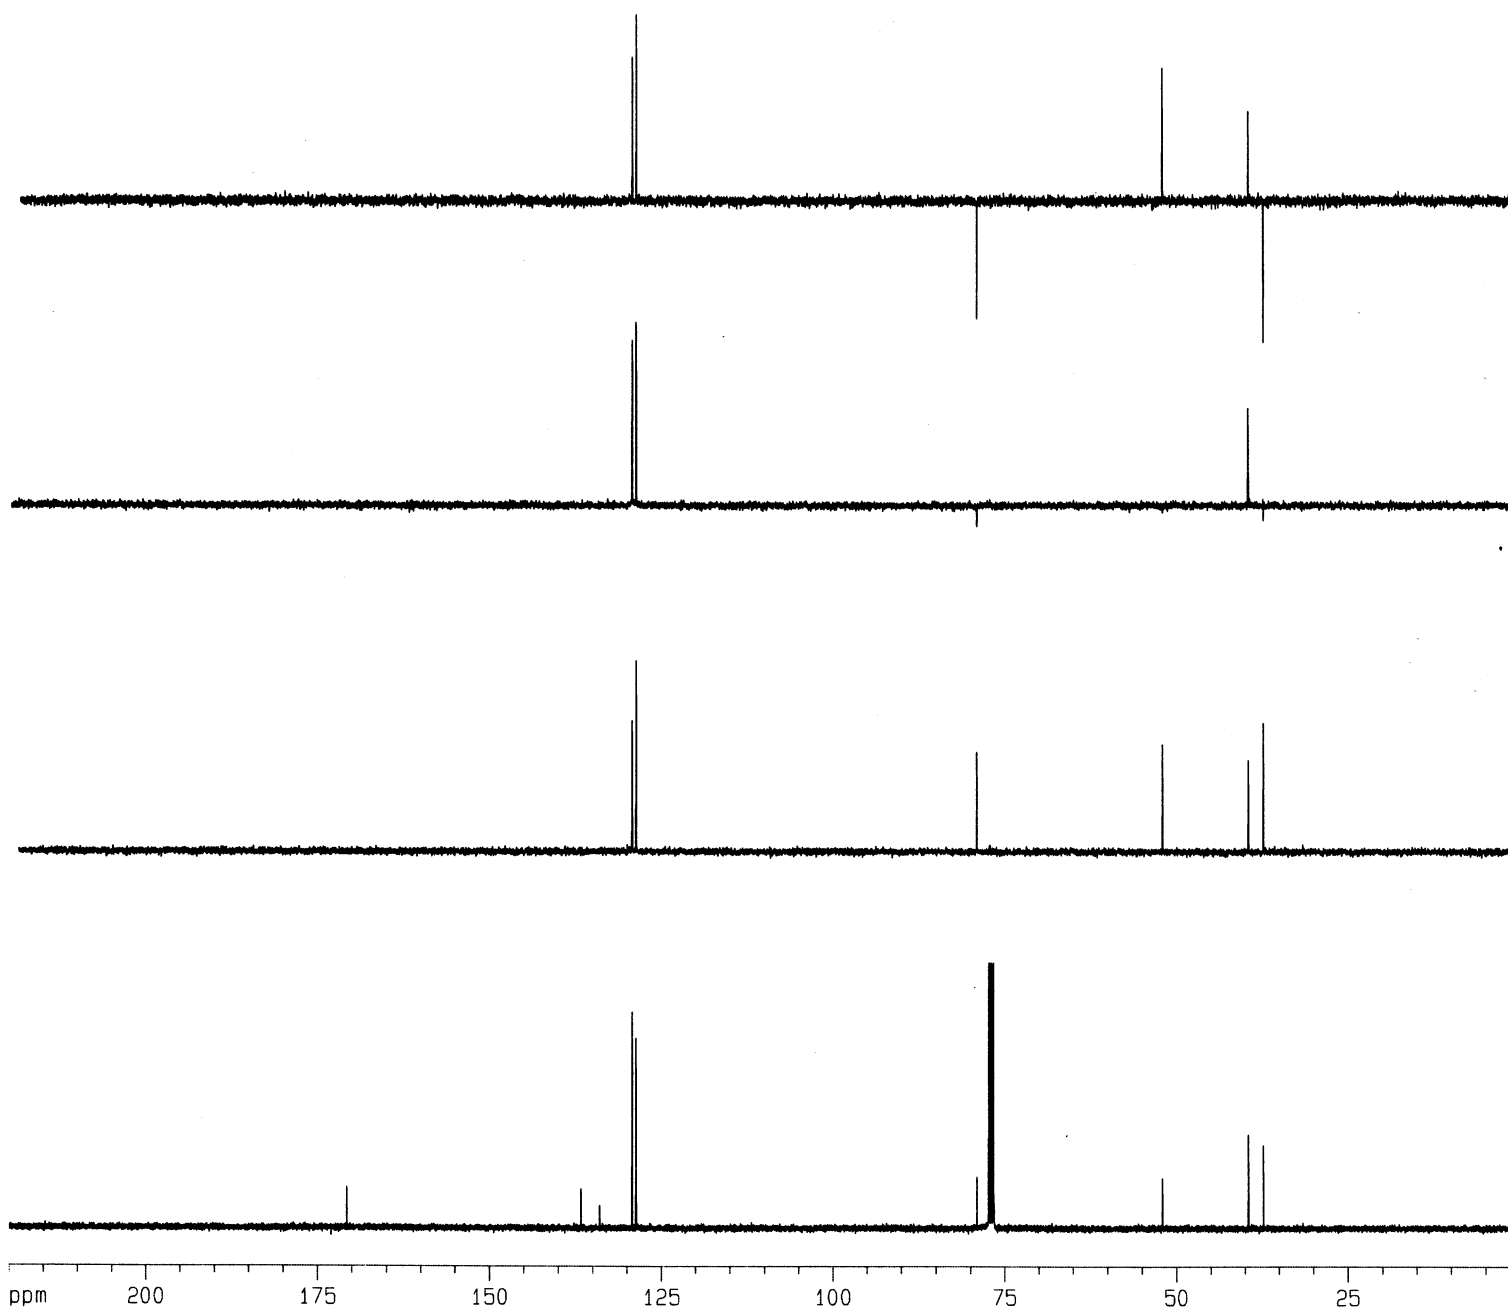

Current Data Parameters  
 NAME LCH-2-288  
 EXPNO 4  
 PROCNO 1

F2 - Acquisition Parameters  
 Date\_ 20141010  
 Time 3.02  
 INSTRUM spect  
 PROBHD 5 mm QNP 1H  
 PULPROG zgpg30  
 TD 65536  
 SOLVENT CDC13  
 NS 3072  
 DS 4  
 SWH 25125.629 Hz  
 FIDRES 0.383387 Hz  
 AQ 1.3042164 sec  
 RG 256  
 DW 19.900 usec  
 DE 6.50 usec  
 TE 300.0 K  
 D1 2.0000000 sec  
 d11 0.0300000 sec  
 d12 0.0000200 sec

===== CHANNEL f1 =====  
 NUC1 13C  
 P1 10.20 usec  
 PL1 0.00 dB  
 SF01 100.6237959 MHz

===== CHANNEL f2 =====  
 CPDPRG2 waltz16  
 NUC2 1H  
 PCPD2 90.00 usec  
 PL2 -3.00 dB  
 PL12 14.50 dB  
 PL13 17.50 dB  
 SF02 400.1326008 MHz

F2 - Processing parameters  
 SI 32768  
 SF 100.6127715 MHz  
 WDW EM  
 SSB 0  
 LB 0.30 Hz  
 GB 0  
 PC 1.40

1D NMR plot parameters  
 CX 20.00 cm  
 F1P 220.000 ppm  
 F1 22134.81 Hz  
 F2P 0.000 ppm  
 F2 0.00 Hz  
 PPMCM 11.00000 ppm/cm  
 HZCM 1106.74048 Hz/cm

Fig S52. <sup>1</sup>H NMR (CDCl<sub>3</sub>, 400 MHz) of compound 2d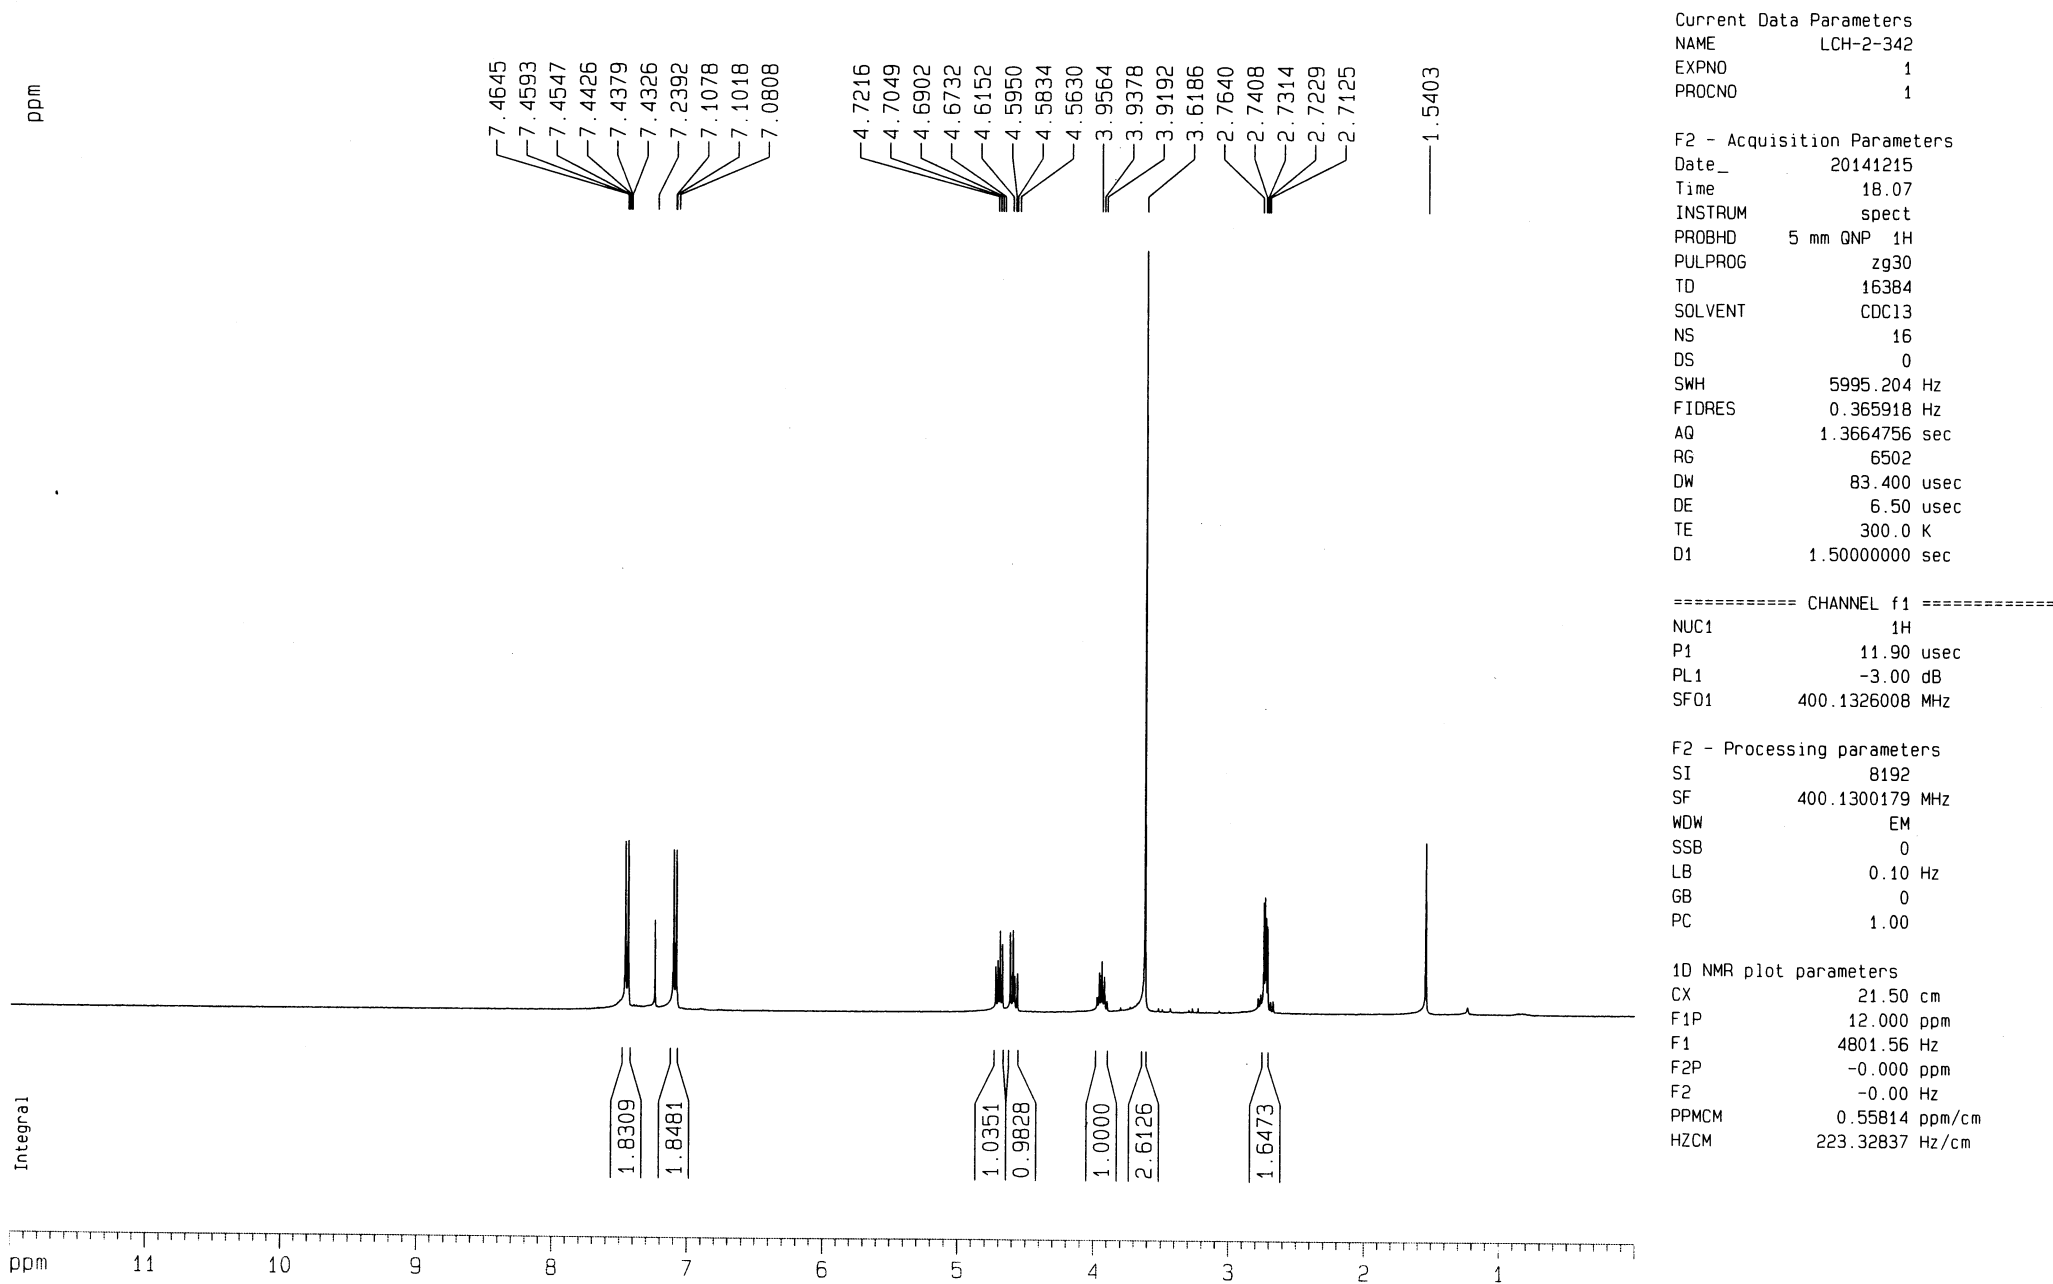



## C13 spectrum of

Fig S53. 13C NMR (CDCl3, 100 MHz) of compound 2d

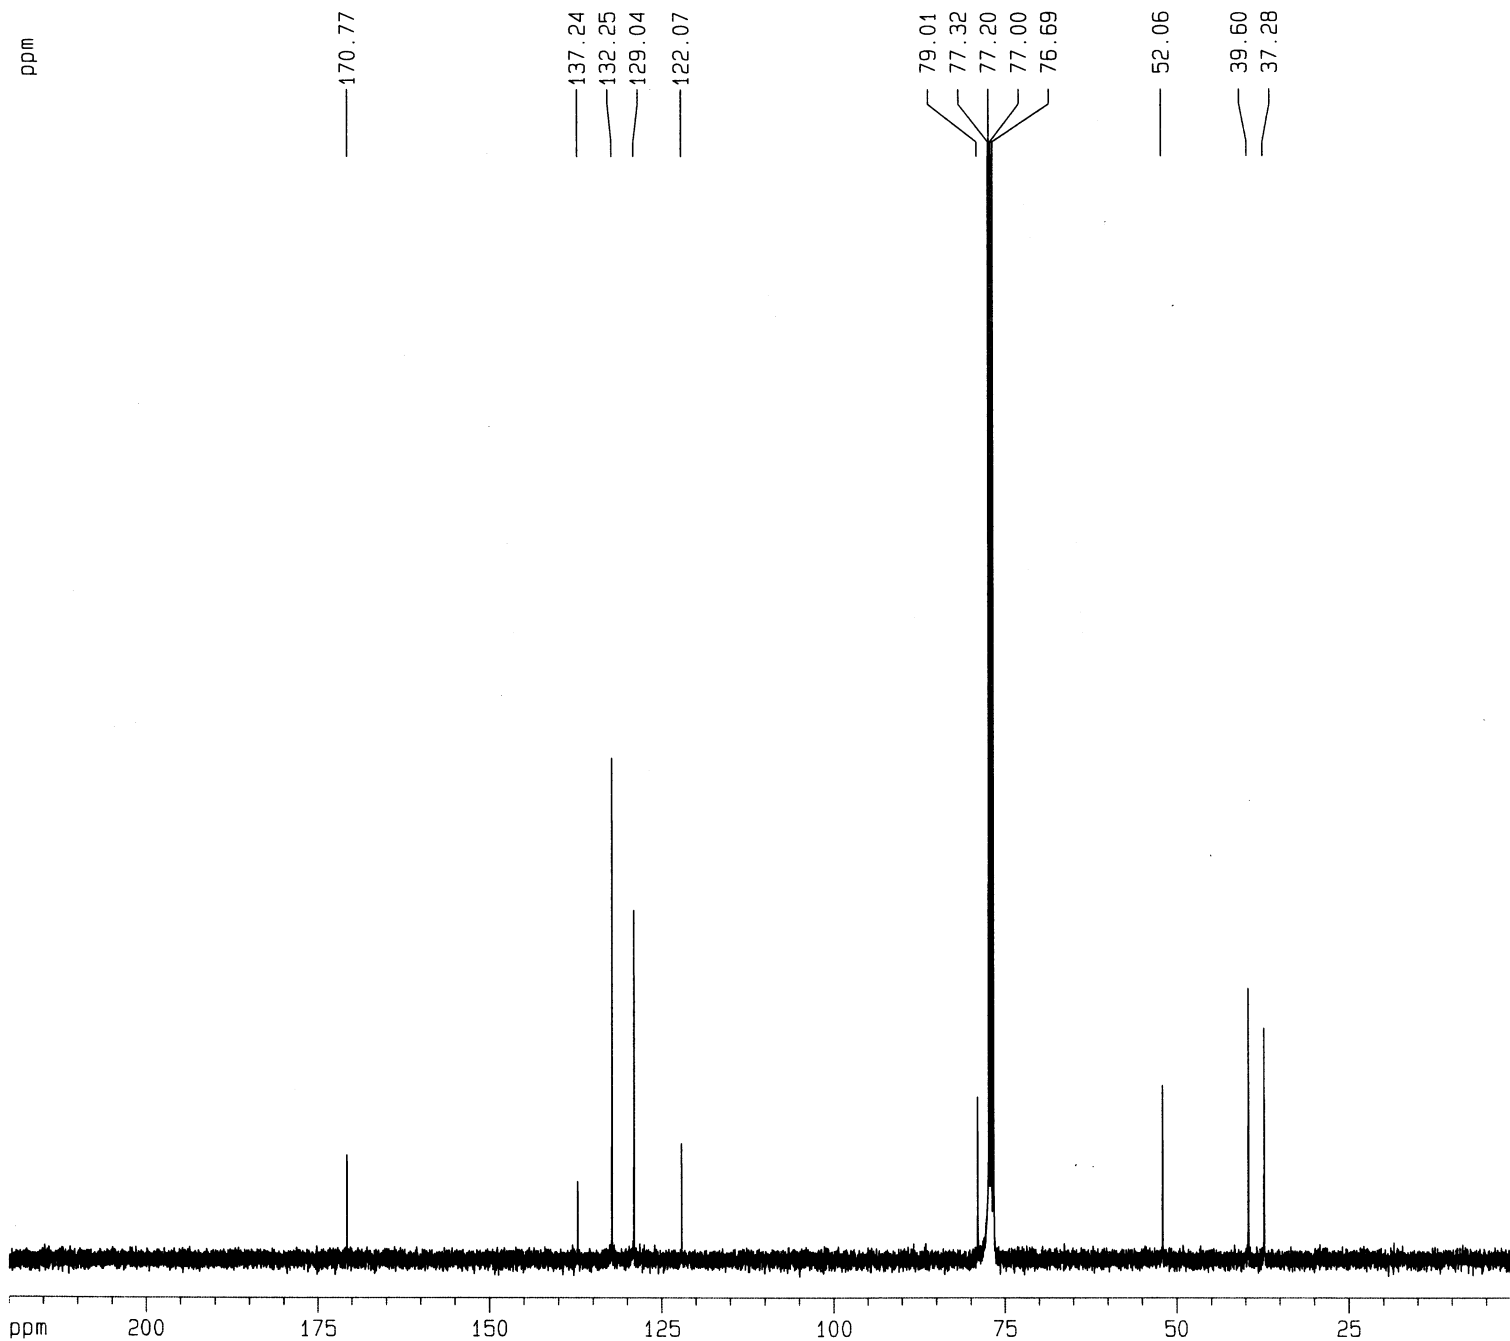

Current Data Parameters  
 NAME LCH-2-342  
 EXPNO 3  
 PROCNO 1

F2 - Acquisition Parameters  
 Date\_ 20141216  
 Time 2.29  
 INSTRUM spect  
 PROBHD 5 mm QNP 1H  
 PULPROG zgpg30  
 TD 65536  
 SOLVENT CDCl3  
 NS 3276  
 DS 4  
 SWH 25125.629 Hz  
 FIDRES 0.383387 Hz  
 AQ 1.3042164 sec  
 RG 256  
 DW 19.900 usec  
 DE 6.50 usec  
 TE 300.0 K  
 D1 2.00000000 sec  
 d11 0.03000000 sec  
 d12 0.00002000 sec

===== CHANNEL f1 =====  
 NUC1 13C  
 P1 10.20 usec  
 PL1 0.00 dB  
 SF01 100.6237959 MHz

===== CHANNEL f2 =====  
 CPDPRG2 waltz16  
 NUC2 1H  
 PCPD2 90.00 usec  
 PL2 -3.00 dB  
 PL12 14.50 dB  
 PL13 17.50 dB  
 SF02 400.1326008 MHz

F2 - Processing parameters  
 SI 32768  
 SF 100.6127715 MHz  
 WDW EM  
 SSB 0  
 LB 0.30 Hz  
 GB 0  
 PC 1.40

1D NMR plot parameters  
 CX 20.00 cm  
 F1P 220.000 ppm  
 F1 22134.81 Hz  
 F2P 0.000 ppm  
 F2 0.00 Hz  
 PPMCM 11.00000 ppm/cm  
 HZCM 1106.74048 Hz/cm

Fig S54. DEPT of compound 2d

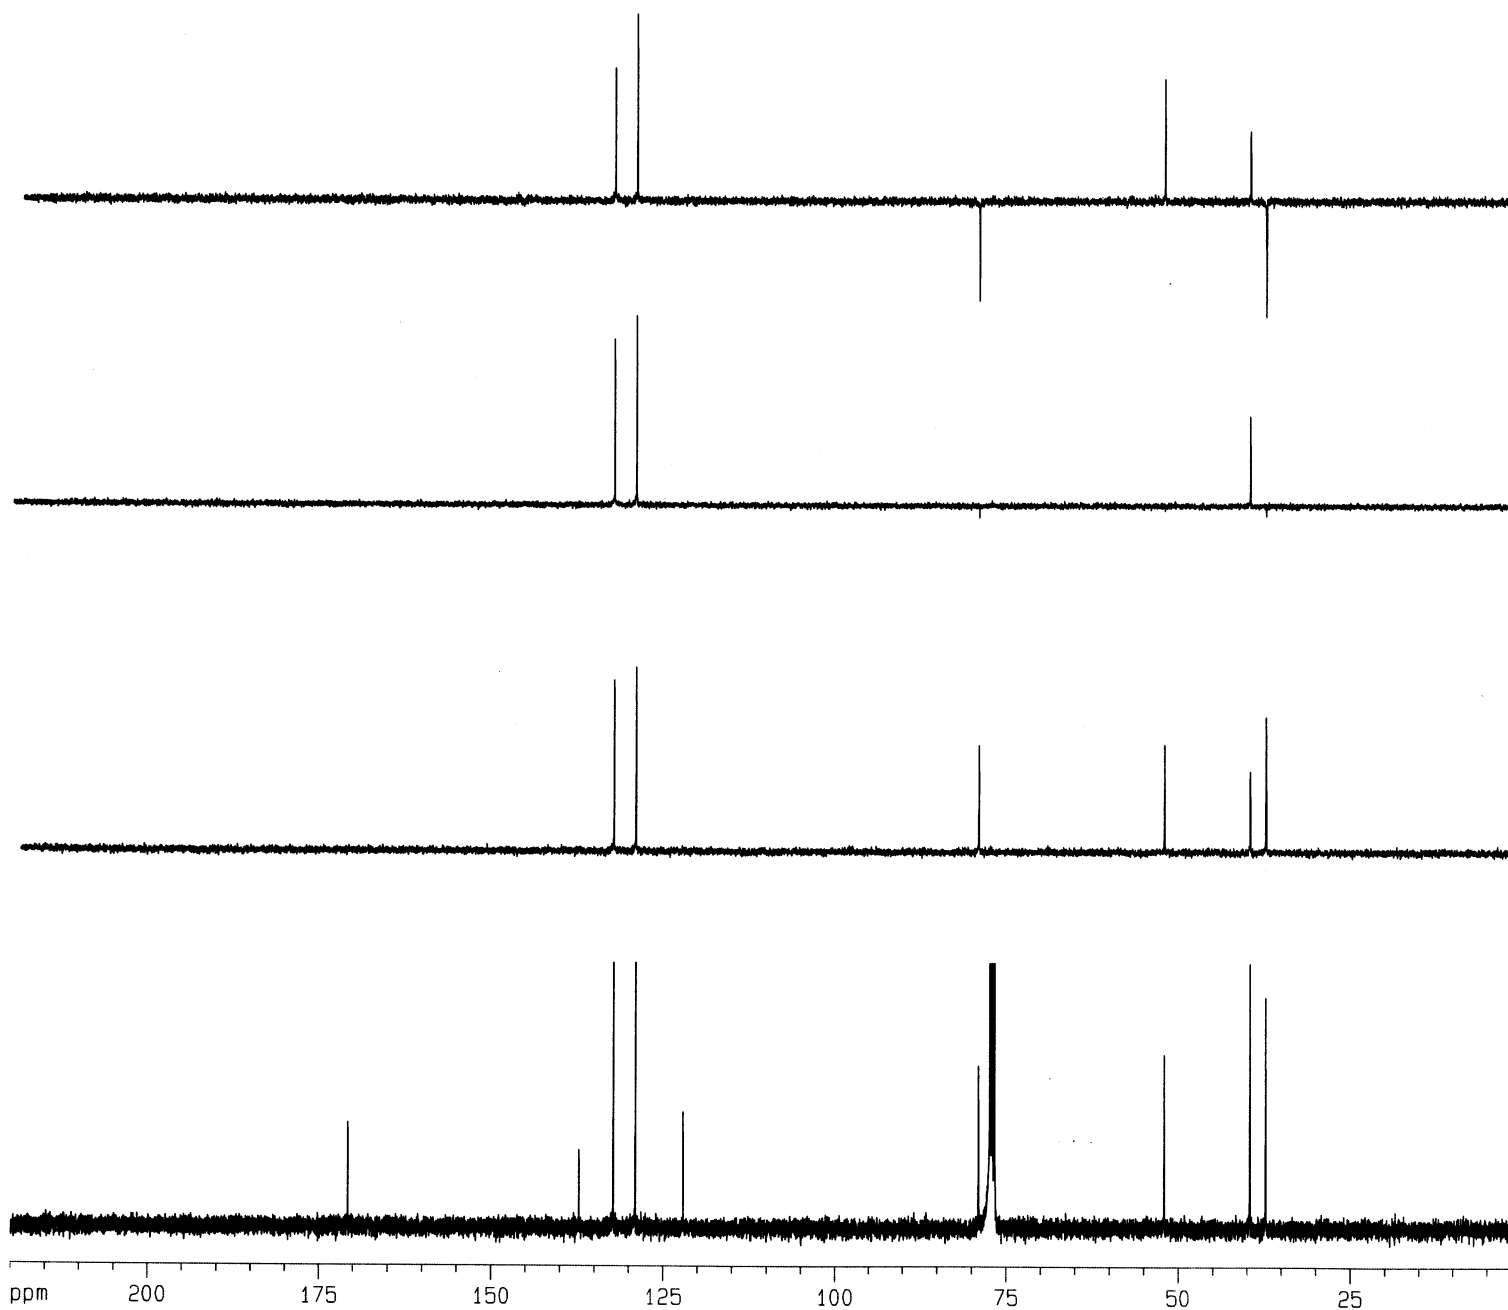

Current Data Parameters  
 NAME LCH-2-342  
 EXPNO 3  
 PROCNO 1

F2 - Acquisition Parameters  
 Date\_ 20141216  
 Time 2.29  
 INSTRUM spect  
 PROBHD 5 mm QNP 1H  
 PULPROG zgpg30  
 TD 65536  
 SOLVENT CDC13  
 NS 3276  
 DS 4  
 SWH 25125.629 Hz  
 FIDRES 0.383387 Hz  
 AQ 1.3042164 sec  
 RG 256  
 DW 19.900 usec  
 DE 6.50 usec  
 TE 300.0 K  
 D1 2.0000000 sec  
 d11 0.0300000 sec  
 d12 0.00002000 sec

===== CHANNEL f1 =====  
 NUC1 13C  
 P1 10.20 usec  
 PL1 0.00 dB  
 SF01 100.6237959 MHz

===== CHANNEL f2 =====  
 CPDPRG2 waltz16  
 NUC2 1H  
 PCPD2 90.00 usec  
 PL2 -3.00 dB  
 PL12 14.50 dB  
 PL13 17.50 dB  
 SF02 400.1326008 MHz

F2 - Processing parameters  
 SI 32768  
 SF 100.6127715 MHz  
 WDW EM  
 SSB 0  
 LB 0.30 Hz  
 GB 0  
 PC 1.40

1D NMR plot parameters  
 CX 20.00 cm  
 F1P 220.000 ppm  
 F1 22134.81 Hz  
 F2P 0.000 ppm  
 F2 0.00 Hz  
 PPMCM 11.00000 ppm/cm  
 HZCM 1106.74048 Hz/cm

Fig S55. <sup>1</sup>H NMR (CDCl<sub>3</sub>, 400 MHz) of compound 2e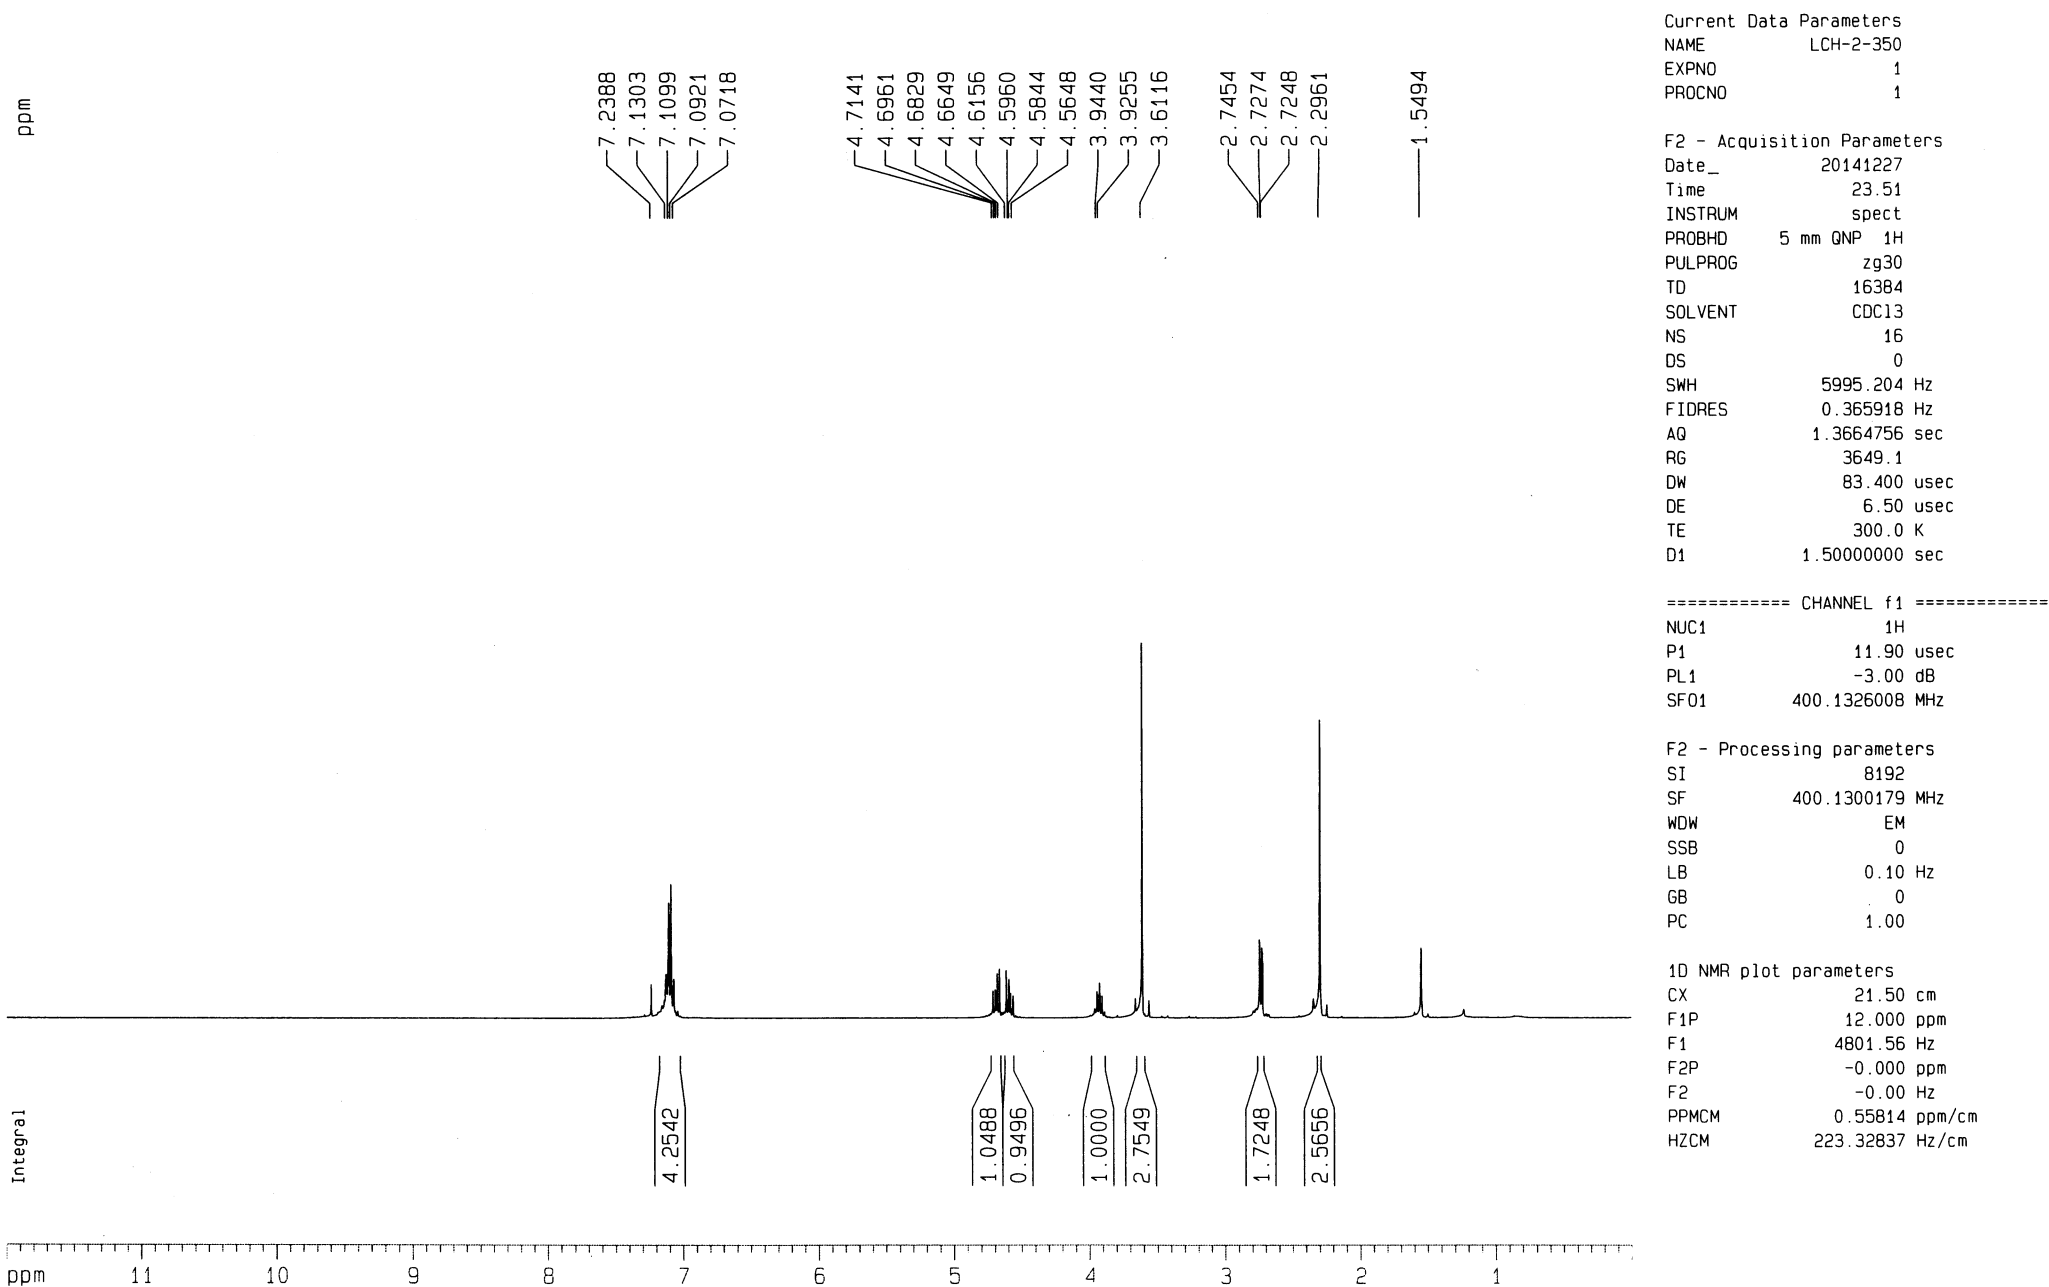

## C13 spectrum of

Fig S56. 13C NMR (CDCl3, 100 MHz) of compound 2e

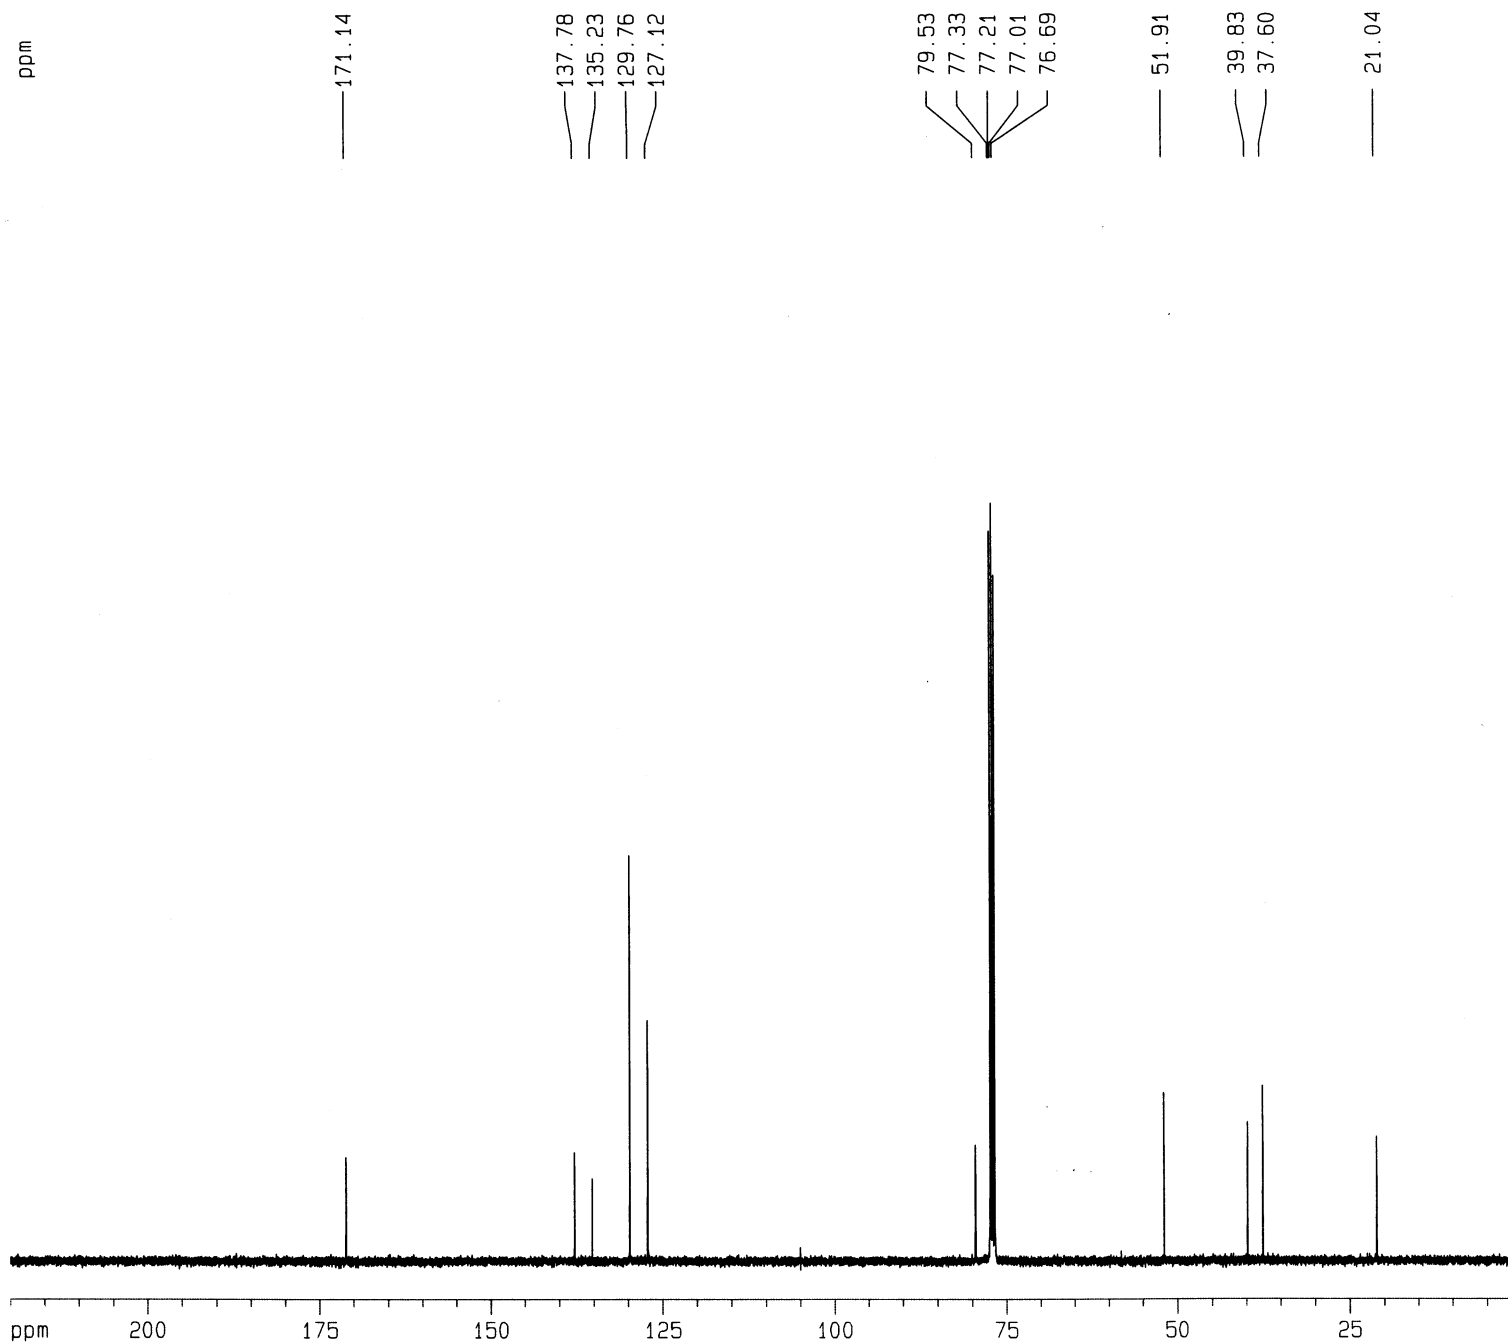

Current Data Parameters  
 NAME LCH-2-350  
 EXPNO 2  
 PROCNO 1

F2 - Acquisition Parameters  
 Date\_ 20141228  
 Time 2.54  
 INSTRUM spect  
 PROBHD 5 mm GNP 1H  
 PULPROG zgpg30  
 TD 65536  
 SOLVENT CDC13  
 NS 3276  
 DS 4  
 SWH 25125.629 Hz  
 FIDRES 0.383387 Hz  
 AQ 1.3042164 sec  
 RG 256  
 DW 19.900 usec  
 DE 6.50 usec  
 TE 300.0 K  
 D1 2.00000000 sec  
 d11 0.03000000 sec  
 d12 0.00002000 sec

===== CHANNEL f1 =====  
 NUC1 13C  
 P1 10.20 usec  
 PL1 0.00 dB  
 SF01 100.6237959 MHz

===== CHANNEL f2 =====  
 CPDPRG2 waltz16  
 NUC2 1H  
 PCPD2 90.00 usec  
 PL2 -3.00 dB  
 PL12 14.50 dB  
 PL13 17.50 dB  
 SF02 400.1326008 MHz

F2 - Processing parameters  
 SI 32768  
 SF 100.6127692 MHz  
 WDW EM  
 SSB 0  
 LB 0.30 Hz  
 GB 0  
 PC 1.40

1D NMR plot parameters  
 CX 20.00 cm  
 F1P 220.000 ppm  
 F1 22134.81 Hz  
 F2P 0.000 ppm  
 F2 0.00 Hz  
 PPMCM 11.00000 ppm/cm  
 HZCM 1106.74048 Hz/cm

Fig S57. DEPT of compound 2e

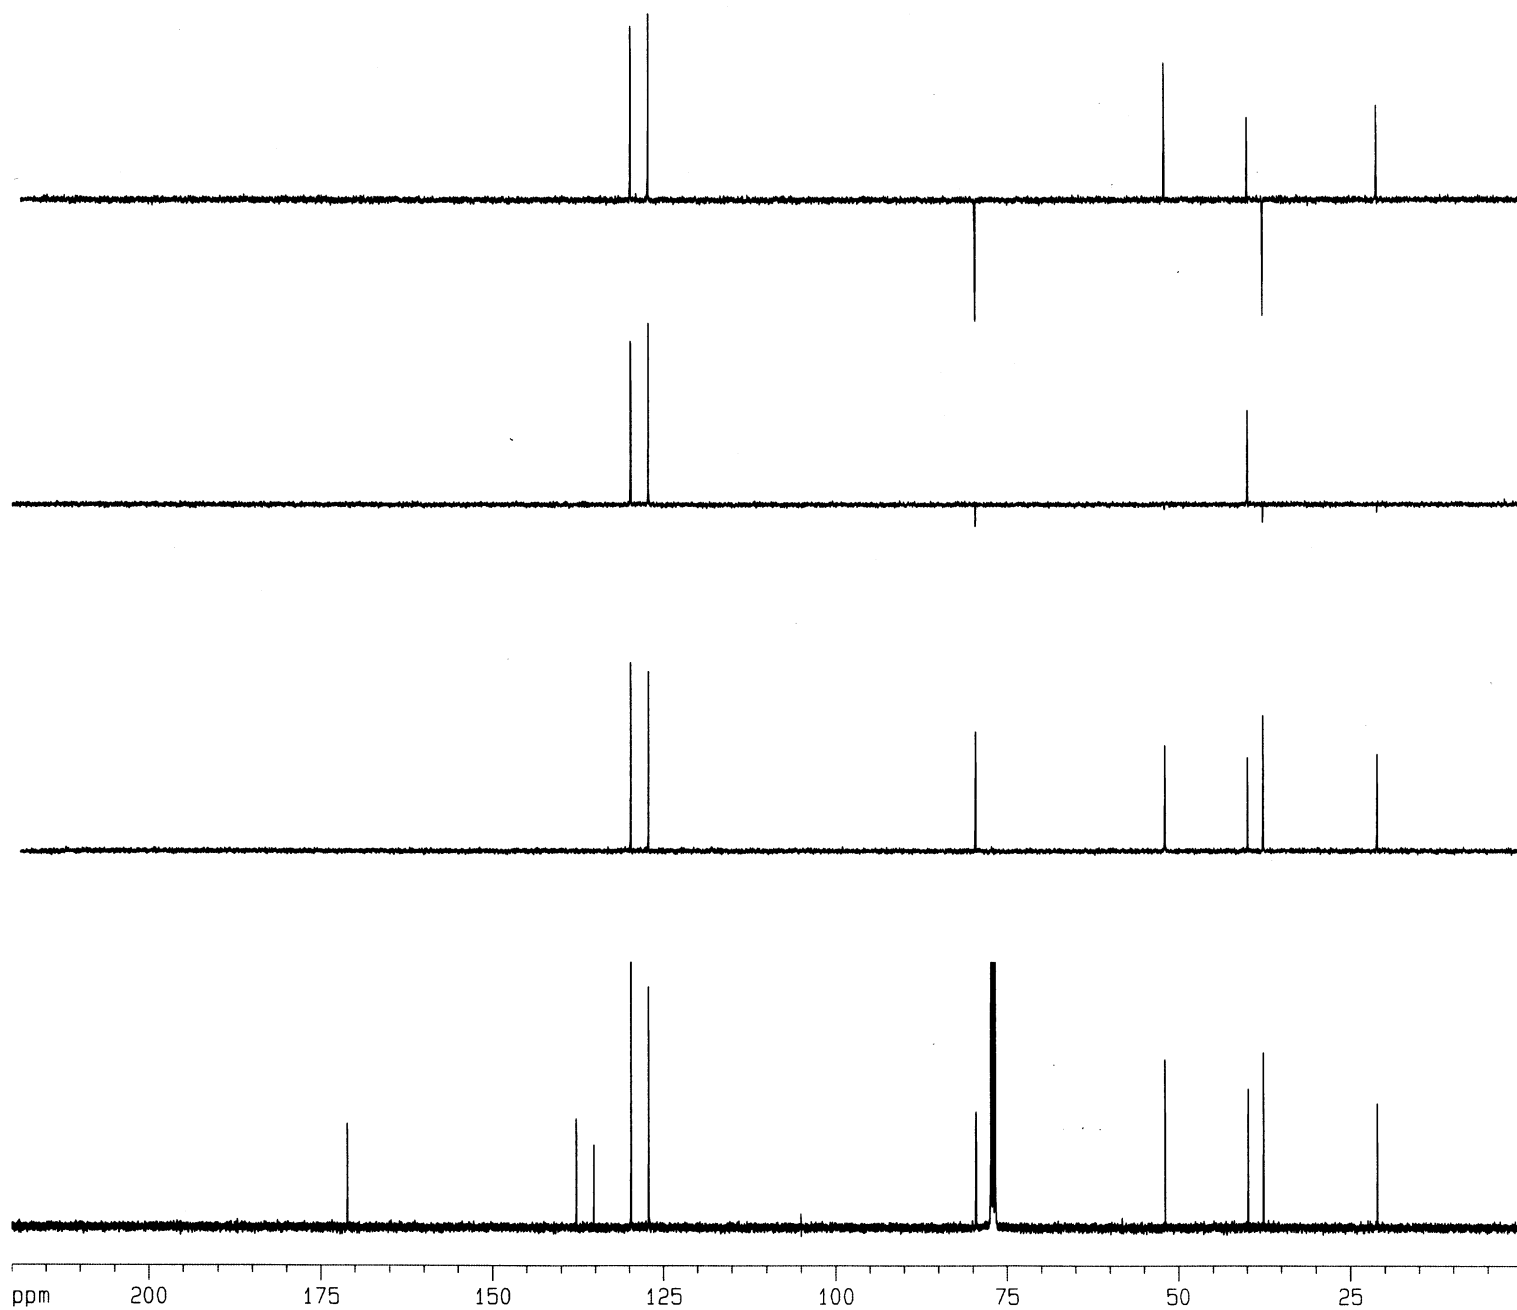

## Current Data Parameters

NAME LCH-2-350  
EXPNO 2  
PROCNO 1

## F2 - Acquisition Parameters

Date\_ 20141228  
Time 2.54  
INSTRUM spect  
PROBHD 5 mm QNP 1H  
PULPROG zgpg30  
TD 65536  
SOLVENT CDCl3  
NS 3276  
DS 4  
SWH 25125.629 Hz  
FIDRES 0.383387 Hz  
AQ 1.3042164 sec  
RG 256  
DW 19.900 usec  
DE 6.50 usec  
TE 300.0 K  
D1 2.0000000 sec  
d11 0.0300000 sec  
d12 0.0000200 sec

## ===== CHANNEL f1 =====

NUC1 13C  
P1 10.20 usec  
PL1 0.00 dB  
SF01 100.6237959 MHz

## ===== CHANNEL f2 =====

CPDPRG2 waltz16  
NUC2 1H  
PCPD2 90.00 usec  
PL2 -3.00 dB  
PL12 14.50 dB  
PL13 17.50 dB  
SF02 400.1326008 MHz

## F2 - Processing parameters

SI 32768  
SF 100.6127692 MHz  
WDW EM  
SSB 0  
LB 0.30 Hz  
GB 0  
PC 1.40

## 1D NMR plot parameters

CX 20.00 cm  
F1P 220.000 ppm  
F1 22134.81 Hz  
F2P 0.000 ppm  
F2 0.00 Hz  
PPMCM 11.00000 ppm/cm  
HZCM 1106.74048 Hz/cm

Fig S58. <sup>1</sup>H NMR (CDCl<sub>3</sub>, 400 MHz) of compound 2f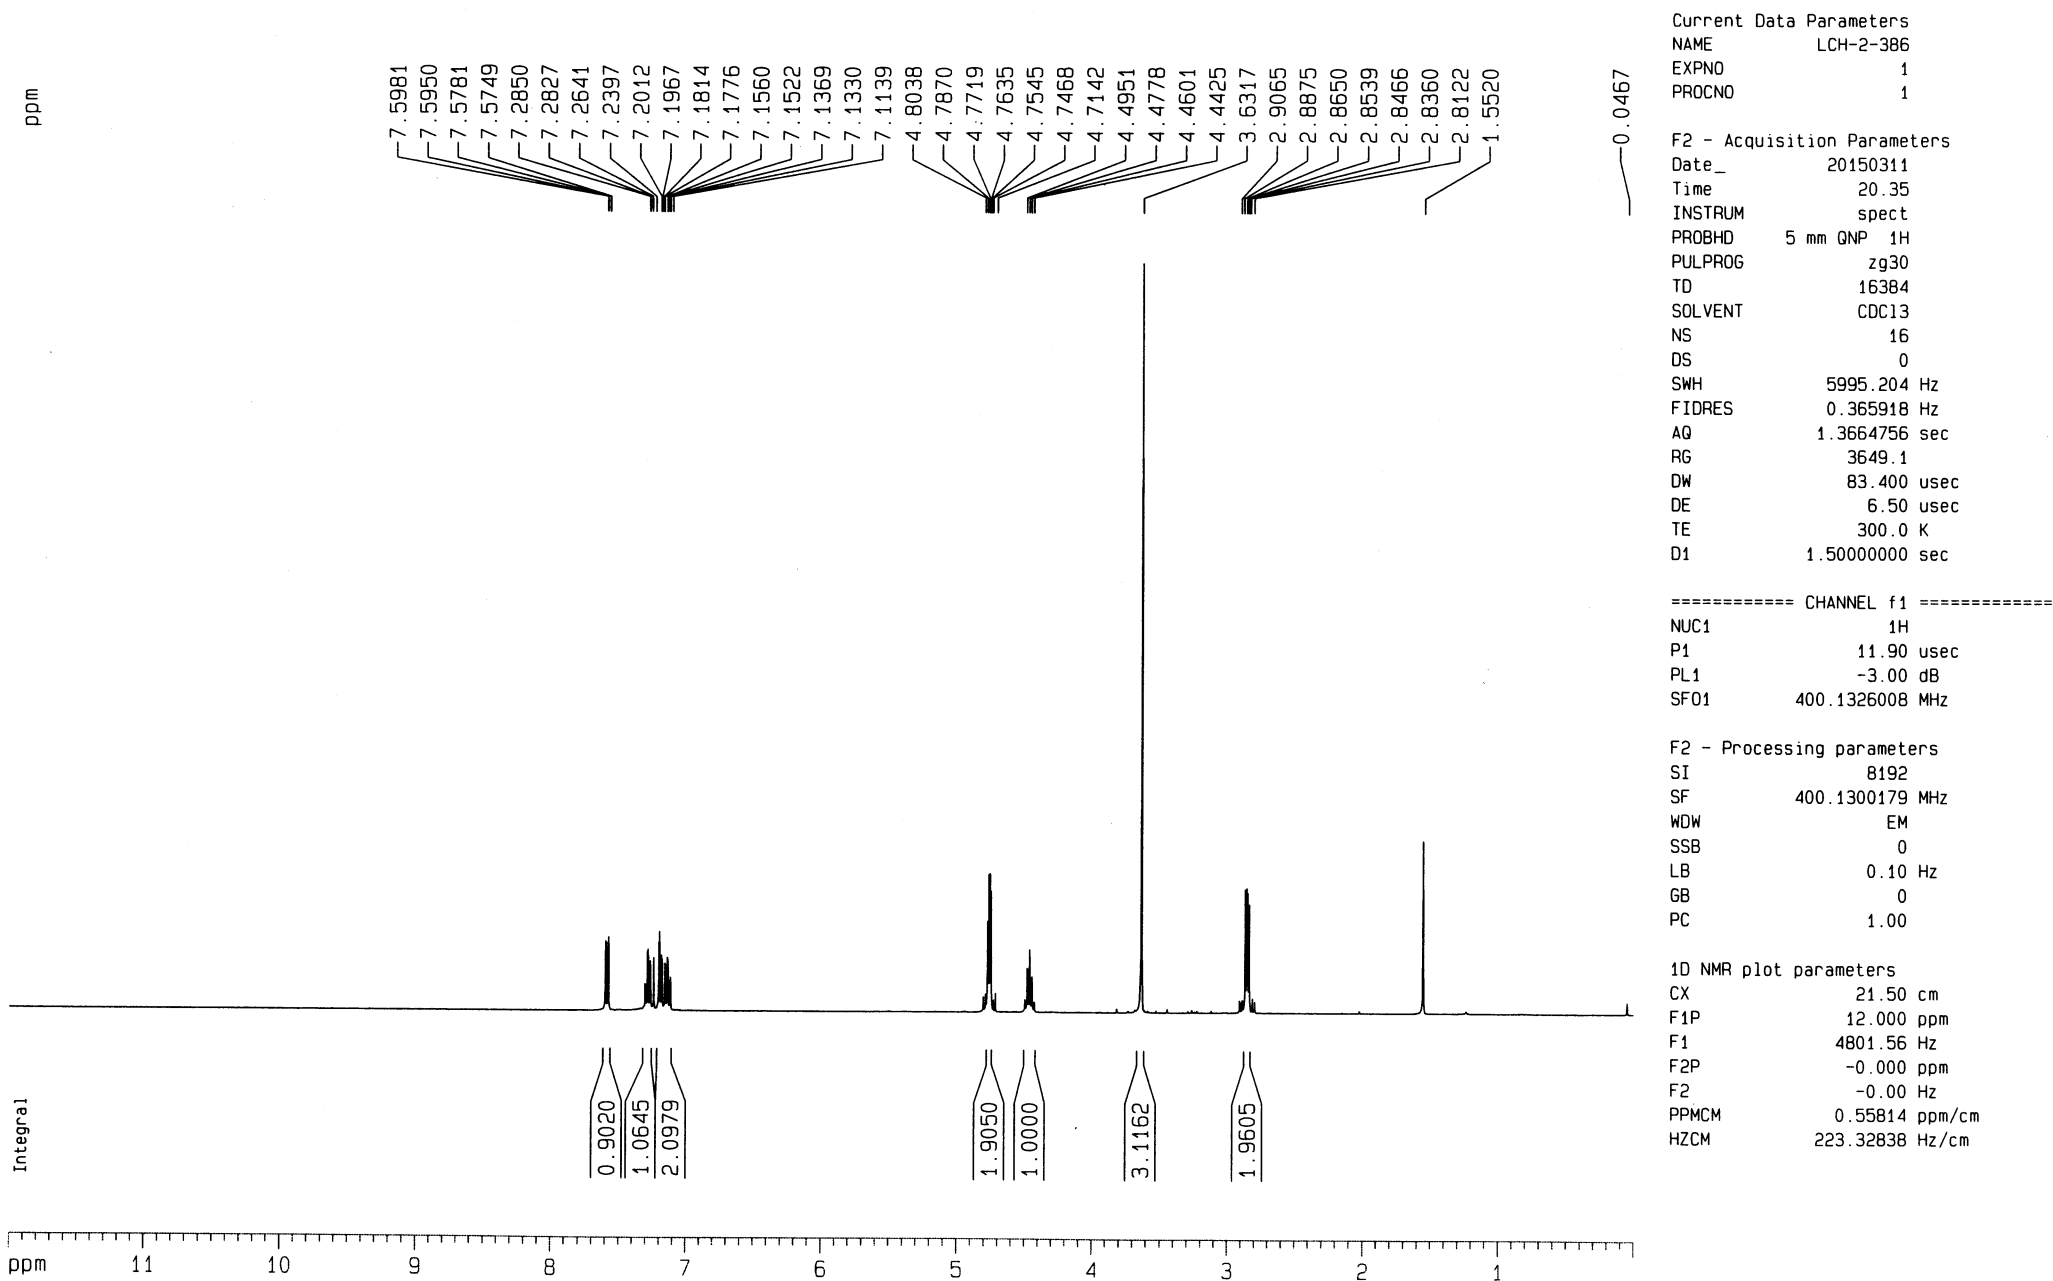

## C13 spectrum of

Fig S59. 13 NMR (CDCl3, 100 MHz) of compound 2f

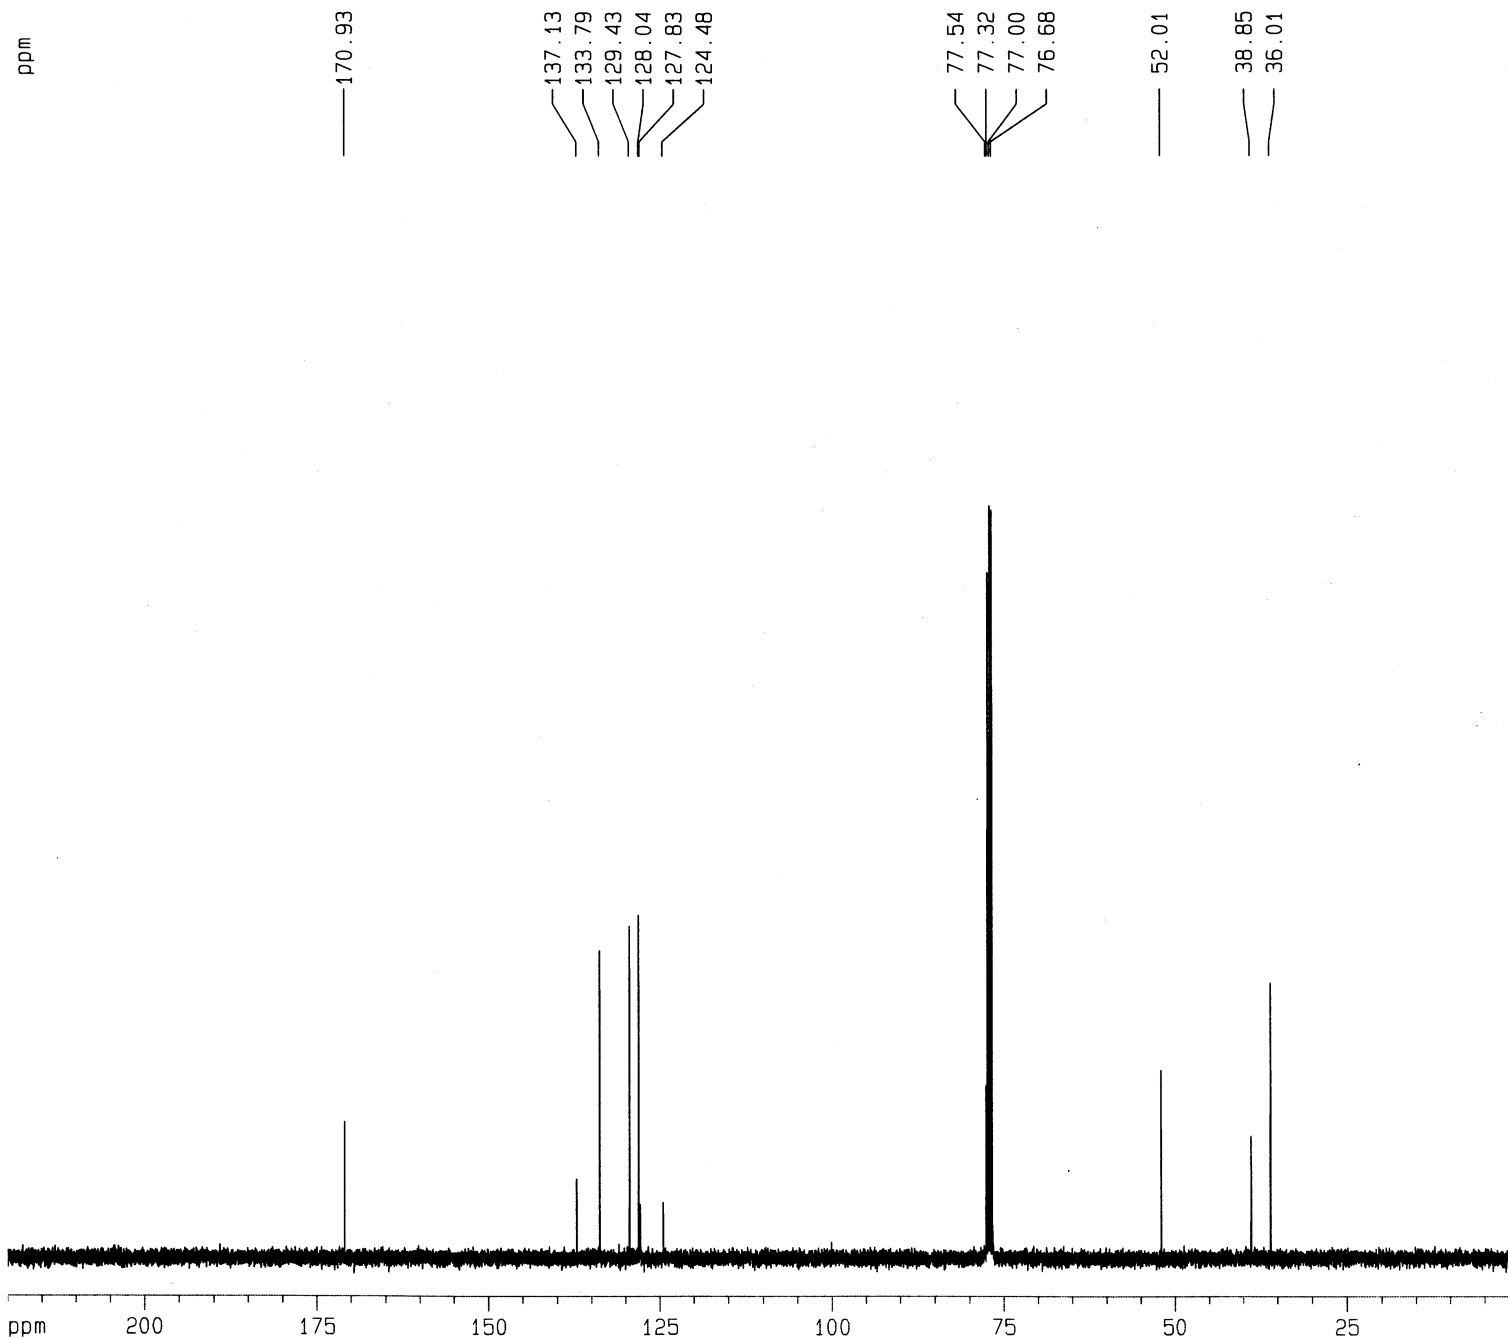

Current Data Parameters  
 NAME LCH-2-386  
 EXPNO 2  
 PROCNO 1

F2 - Acquisition Parameters  
 Date\_ 20150311  
 Time 21.22  
 INSTRUM spect  
 PROBHD 5 mm QNP 1H  
 PULPROG zgpg30  
 TD 65536  
 SOLVENT CDC13  
 NS 819  
 DS 4  
 SWH 25125.629 Hz  
 FIDRES 0.383387 Hz  
 AQ 1.3042164 sec  
 RG 256  
 DW 19.900 usec  
 DE 6.50 usec  
 TE 300.0 K  
 D1 2.0000000 sec  
 d11 0.03000000 sec  
 d12 0.00002000 sec

===== CHANNEL f1 =====  
 NUC1 13C  
 P1 10.20 usec  
 PL1 0.00 dB  
 SF01 100.6237959 MHz

===== CHANNEL f2 =====  
 CPDPRG2 waltz16  
 NUC2 1H  
 PCPD2 90.00 usec  
 PL2 -3.00 dB  
 PL12 14.50 dB  
 PL13 17.50 dB  
 SF02 400.1326008 MHz

F2 - Processing parameters  
 SI 32768  
 SF 100.6127708 MHz  
 WDW EM  
 SSB 0  
 LB 0.30 Hz  
 GB 0  
 PC 1.40

1D NMR plot parameters  
 CX 20.00 cm  
 F1P 220.000 ppm  
 F1 22134.81 Hz  
 F2P 0.000 ppm  
 F2 0.00 Hz  
 PPMCM 11.00000 ppm/cm  
 HZCM 1106.74048 Hz/cm

Fig S60. DEPT of compound 2f

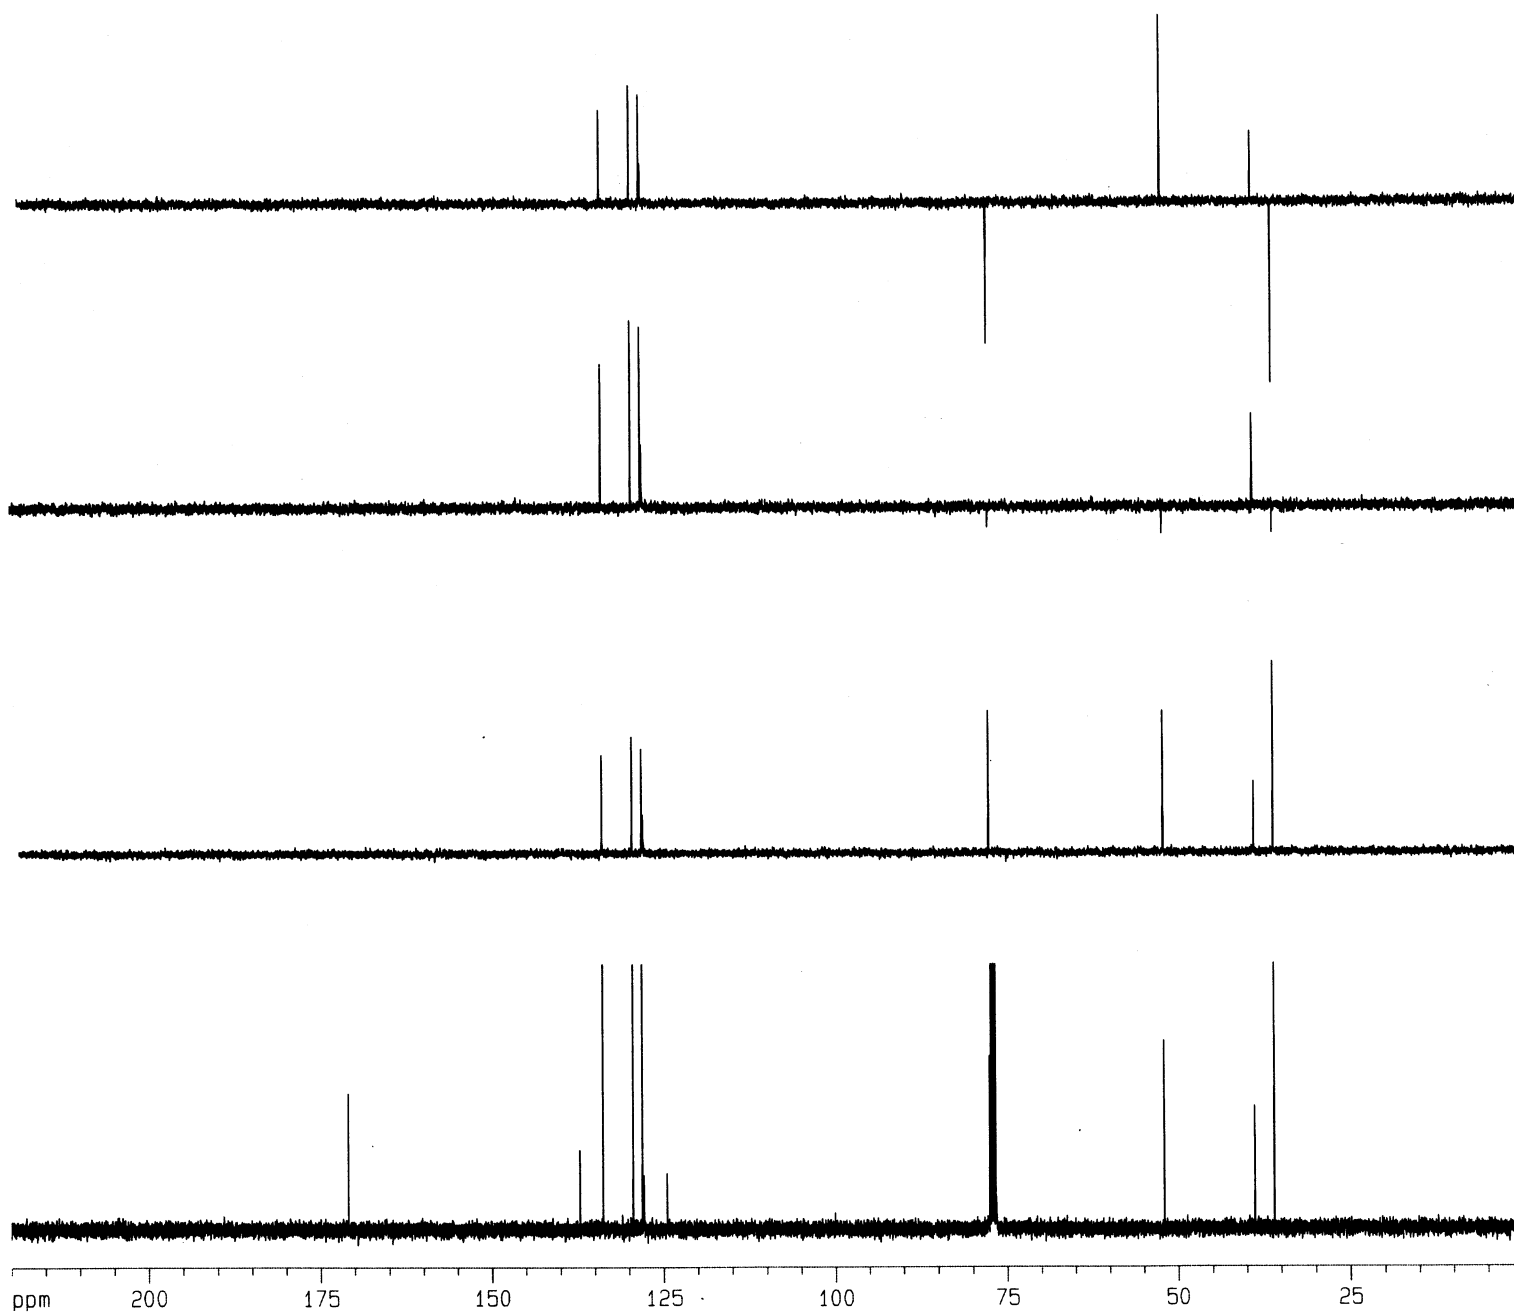

Current Data Parameters  
 NAME LCH-2-386  
 EXPNO 2  
 PROCNO 1

F2 - Acquisition Parameters  
 Date\_ 20150311  
 Time 21.22  
 INSTRUM spect  
 PROBHD 5 mm QNP 1H  
 PULPROG zgpg30  
 TD 65536  
 SOLVENT CDC13  
 NS 819  
 DS 4  
 SWH 25125.629 Hz  
 FIDRES 0.383387 Hz  
 AQ 1.3042164 sec  
 RG 256  
 DW 19.900 usec  
 DE 6.50 usec  
 TE 300.0 K  
 D1 2.0000000 sec  
 d11 0.0300000 sec  
 d12 0.00002000 sec

===== CHANNEL f1 =====  
 NUC1 13C  
 P1 10.20 usec  
 PL1 0.00 dB  
 SF01 100.6237959 MHz

===== CHANNEL f2 =====  
 CPDPRG2 waltz16  
 NUC2 1H  
 PCPD2 90.00 usec  
 PL2 -3.00 dB  
 PL12 14.50 dB  
 PL13 17.50 dB  
 SF02 400.1326008 MHz

F2 - Processing parameters  
 SI 32768  
 SF 100.6127708 MHz  
 WDW EM  
 SSB 0  
 LB 0.30 Hz  
 GB 0  
 PC 1.40

1D NMR plot parameters  
 CX 20.00 cm  
 F1P 220.000 ppm  
 F1 22134.81 Hz  
 F2P 0.000 ppm  
 F2 0.00 Hz  
 PPMCM 11.00000 ppm/cm  
 HZCM 1106.74048 Hz/cm



Fig S61. <sup>1</sup>H NMR (CDCl<sub>3</sub>, 400 MHz) of compound 2g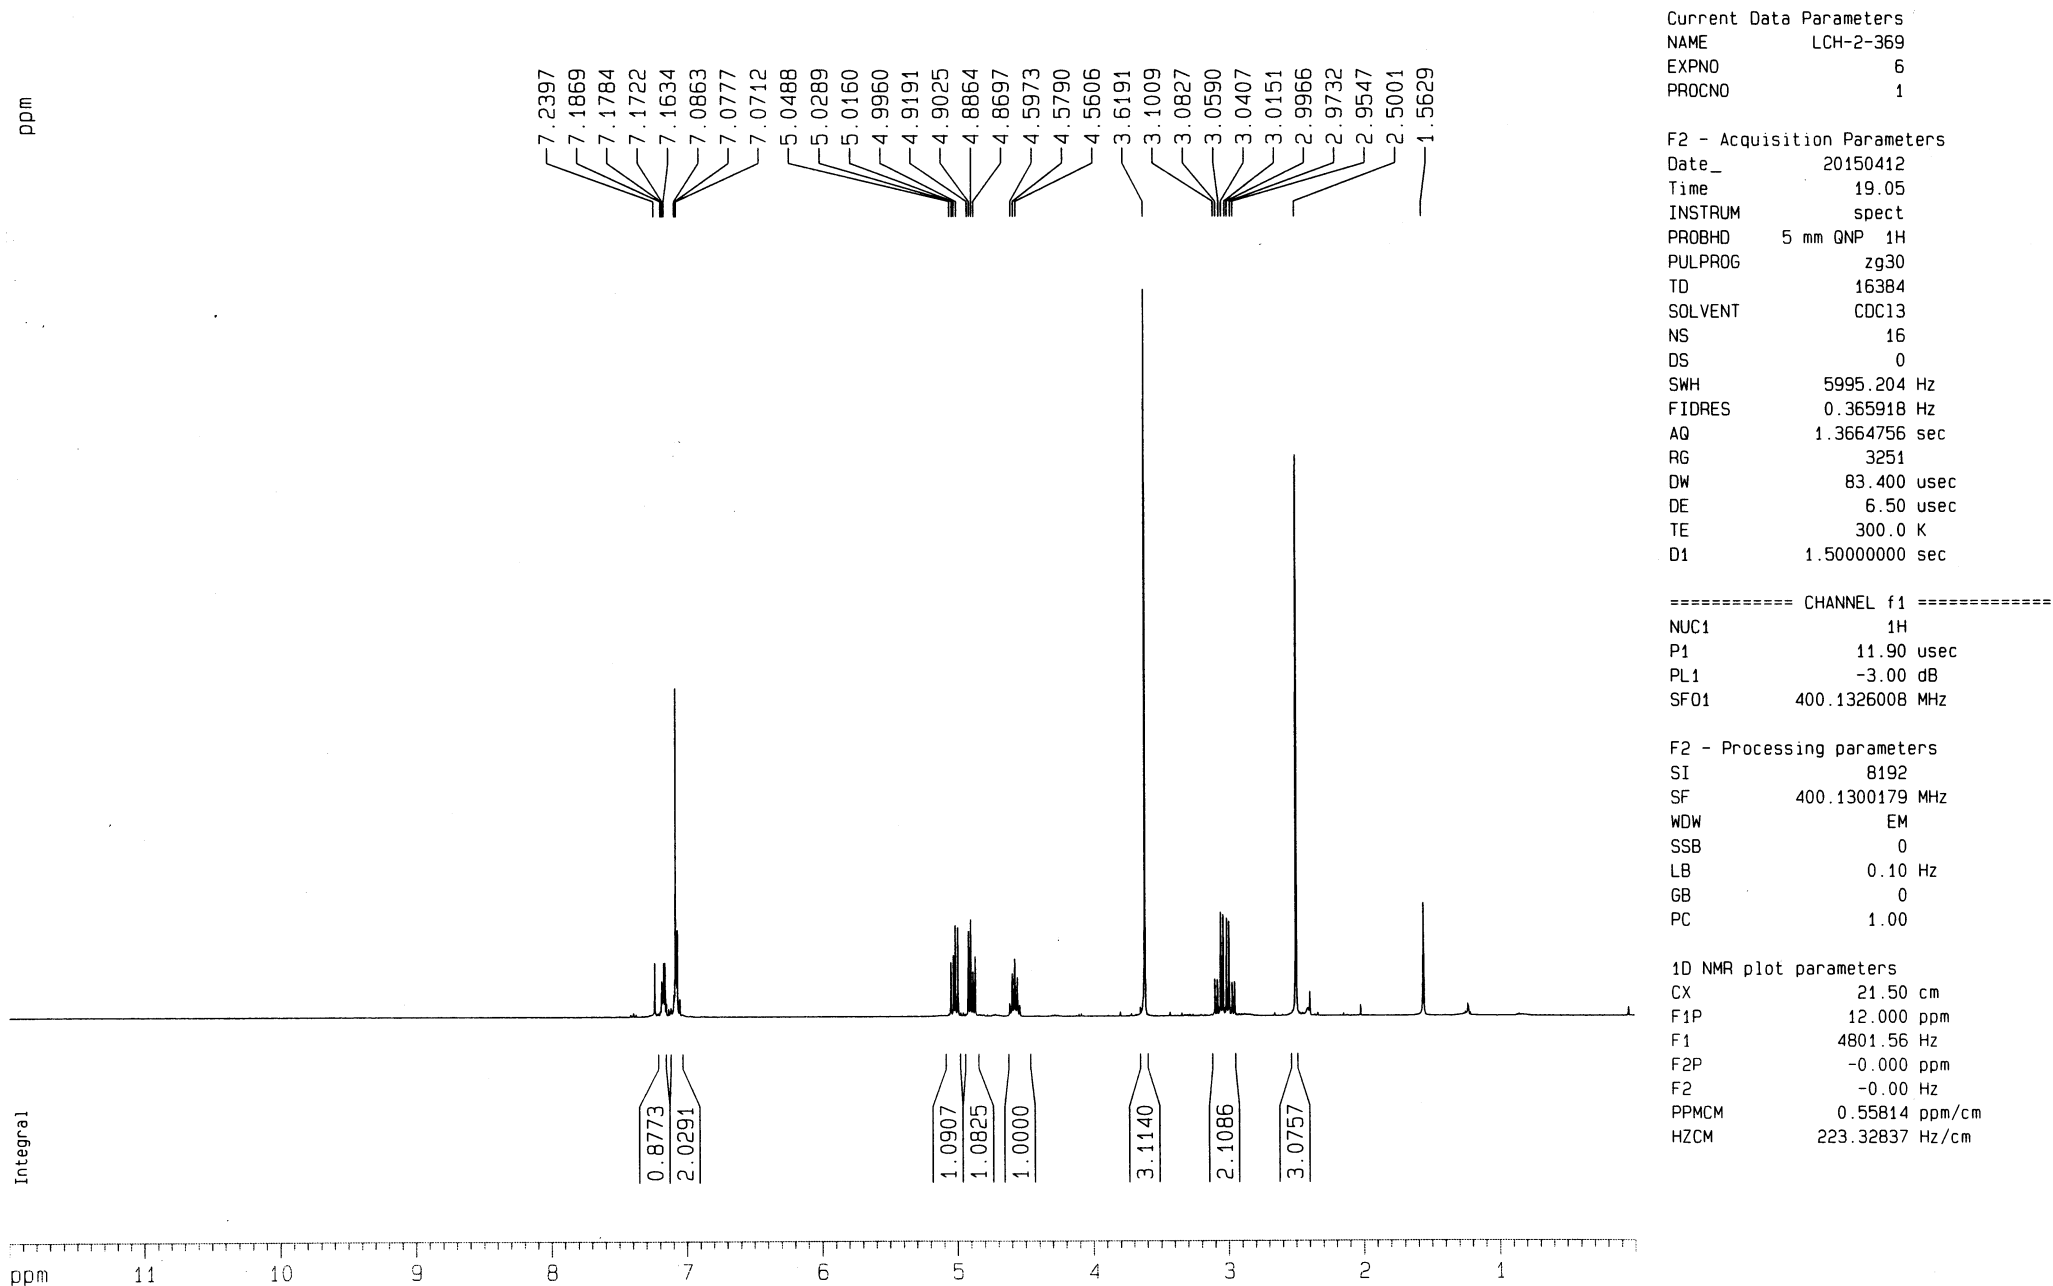

## C13 spectrum of

Fig S62. 13C NMR (CDCl3, 100 MHz) of compound 2g

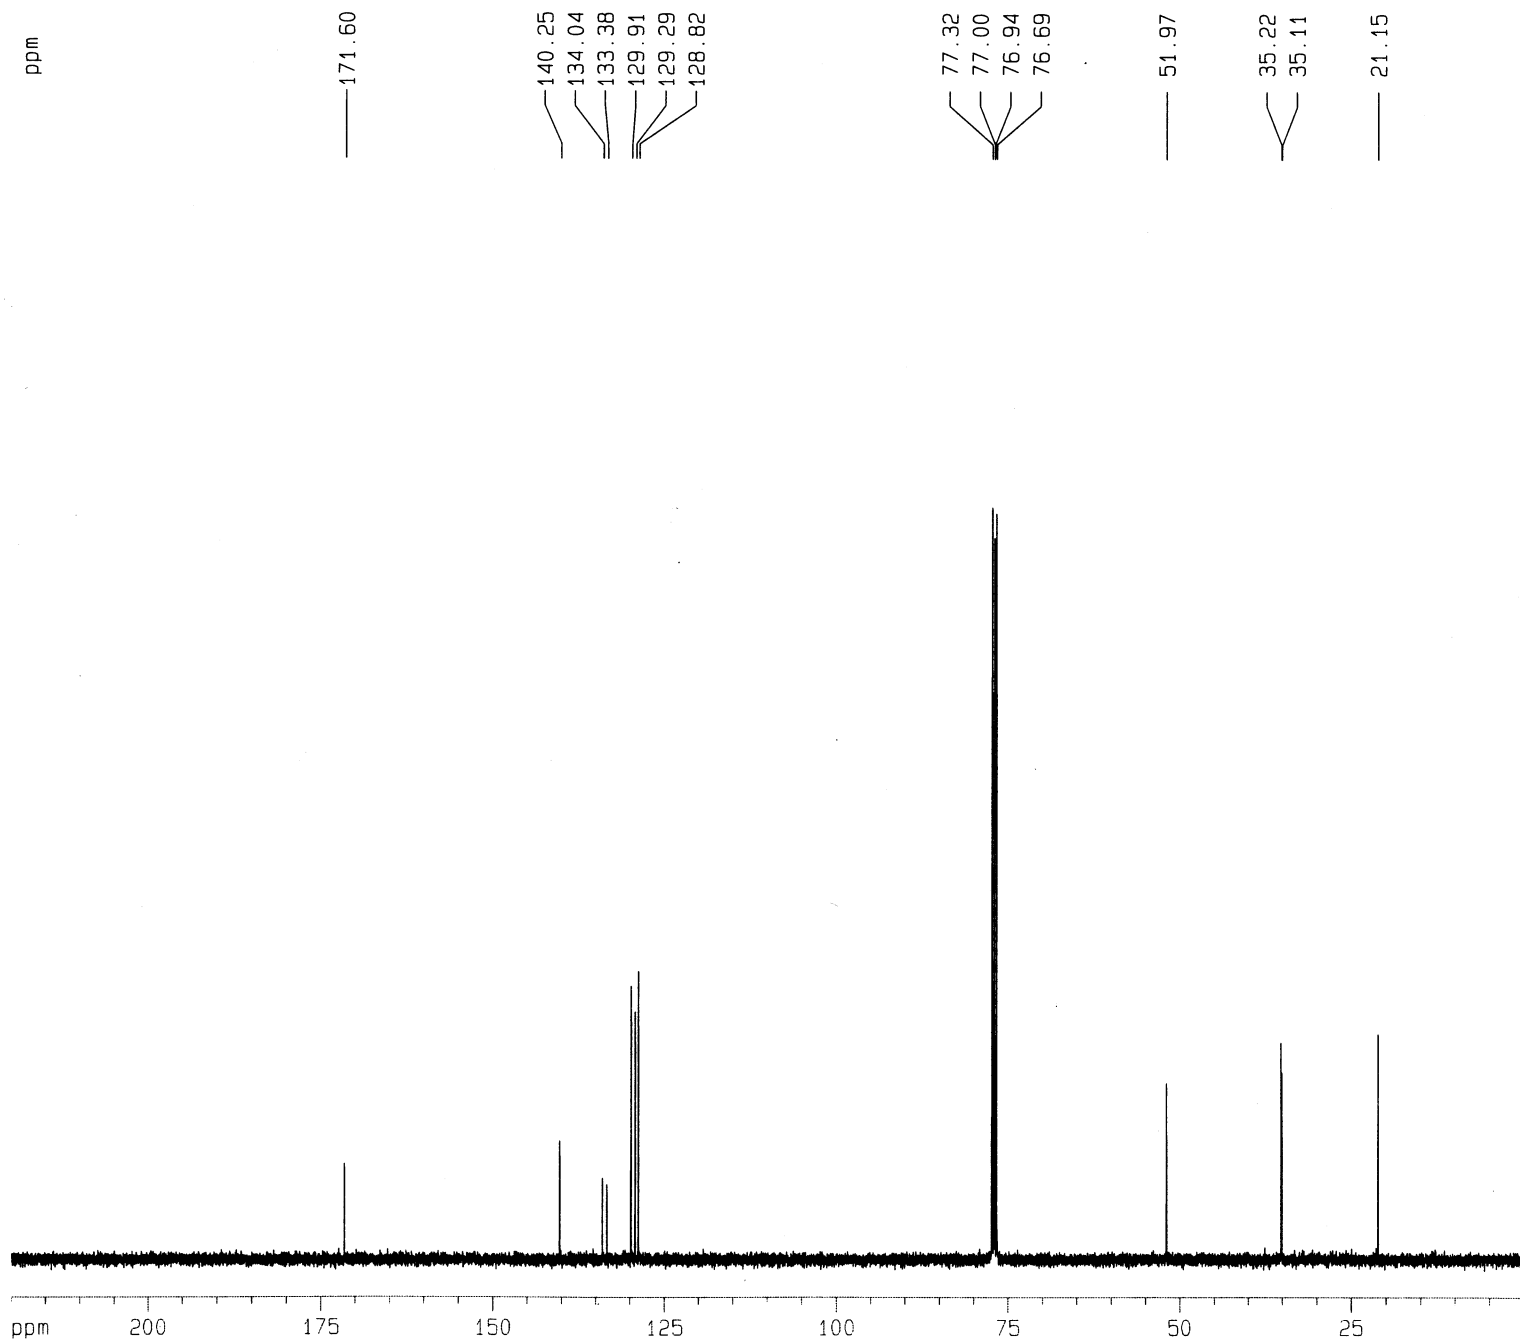

Current Data Parameters  
 NAME LCH-2-369  
 EXPNO 7  
 PROCNO 1

F2 - Acquisition Parameters  
 Date\_ 20150412  
 Time 20.03  
 INSTRUM spect  
 PROBHD 5 mm QNP 1H  
 PULPROG zgpg30  
 TD 65536  
 SOLVENT CDCl3  
 NS 1024  
 DS 4  
 SWH 25125.629 Hz  
 FIDRES 0.383387 Hz  
 AQ 1.3042164 sec  
 RG 256  
 DW 19.900 usec  
 DE 6.50 usec  
 TE 300.0 K  
 D1 2.00000000 sec  
 d11 0.03000000 sec  
 d12 0.00002000 sec

===== CHANNEL f1 =====  
 NUC1 13C  
 P1 10.20 usec  
 PL1 0.00 dB  
 SF01 100.6237959 MHz

===== CHANNEL f2 =====  
 CPDPRG2 waltz16  
 NUC2 1H  
 PCPD2 90.00 usec  
 PL2 -3.00 dB  
 PL12 14.50 dB  
 PL13 17.50 dB  
 SF02 400.1326008 MHz

F2 - Processing parameters  
 SI 32768  
 SF 100.6127715 MHz  
 WDW EM  
 SSB 0  
 LB 0.30 Hz  
 GB 0  
 PC 1.40

1D NMR plot parameters  
 CX 20.00 cm  
 F1P 220.000 ppm  
 F1 22134.81 Hz  
 F2P 0.000 ppm  
 F2 0.00 Hz  
 PPMCM 11.00000 ppm/cm  
 HZCM 1106.74048 Hz/cm

Fig S63. DEPT of compound 2g

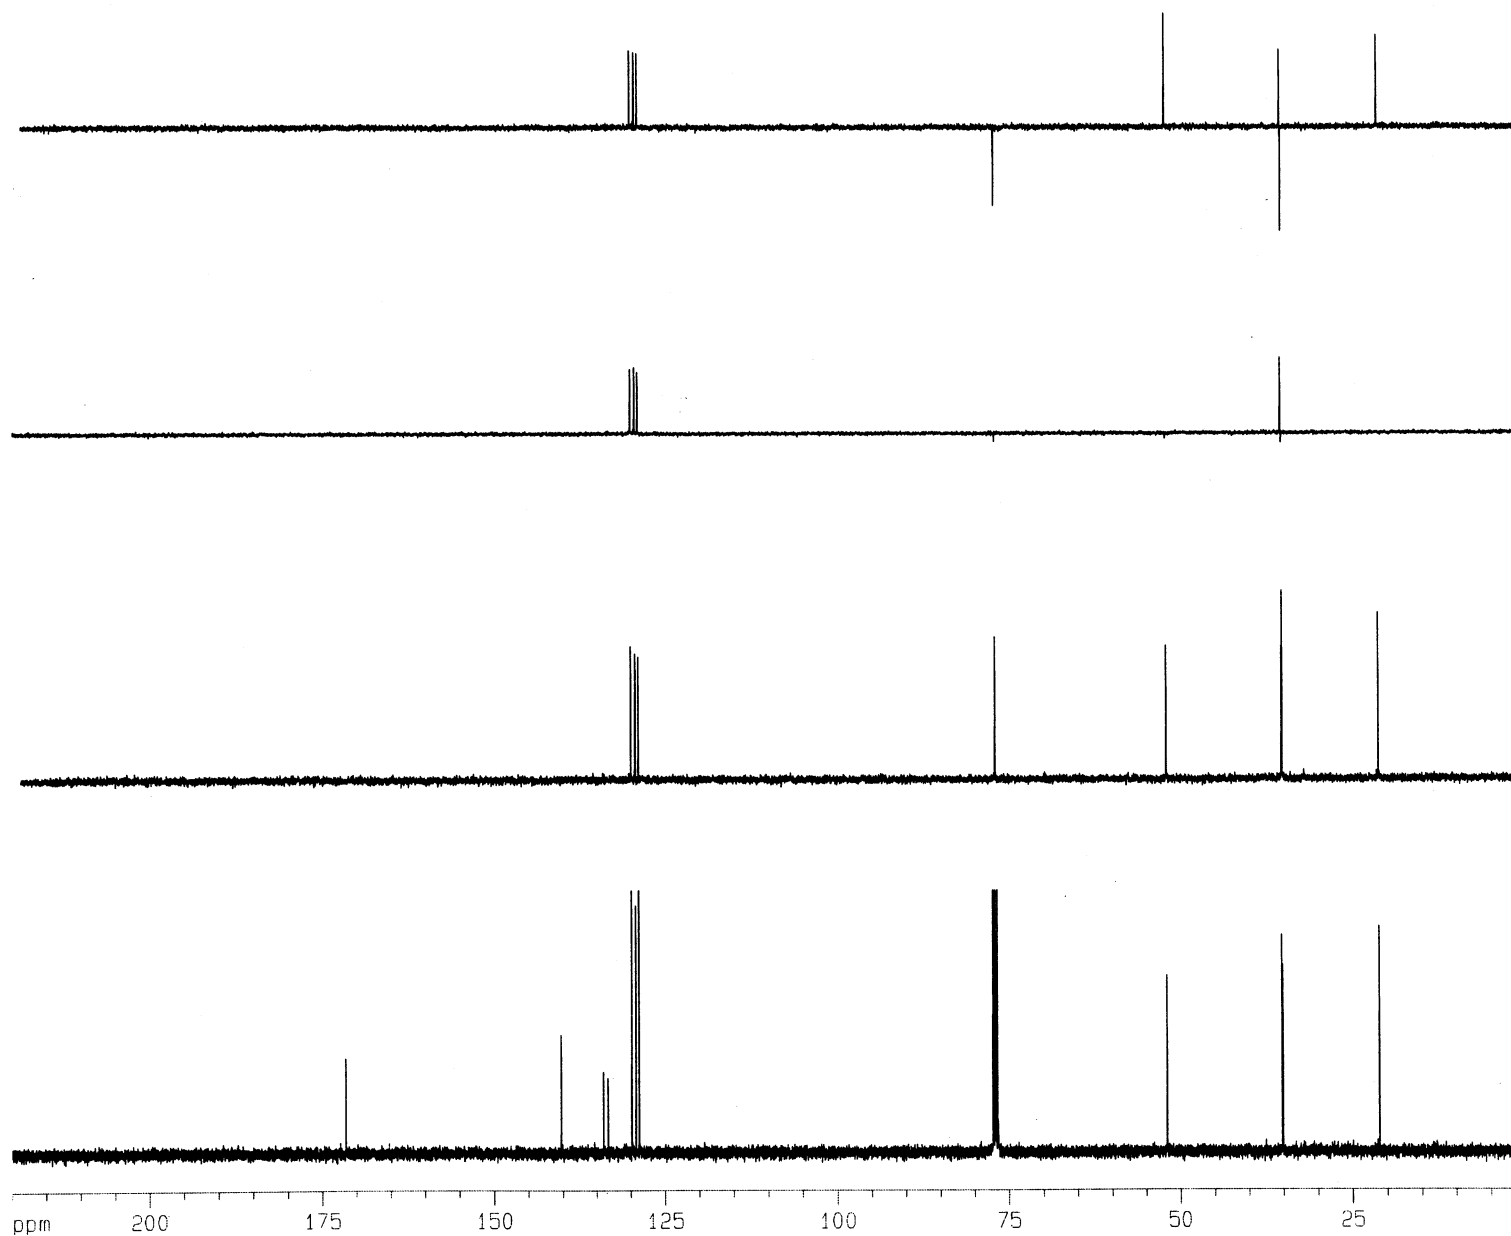

## Current Data Parameters

NAME LCH-2-369  
EXPNO 7  
PROCNO 1

## F2 - Acquisition Parameters

Date\_ 20150412  
Time 20.03  
INSTRUM spect  
PROBHD 5 mm QNP 1H  
PULPROG zgpg30  
TD 65536  
SOLVENT CDCl3  
NS 1024  
DS 4  
SWH 25125.629 Hz  
FIDRES 0.383387 Hz  
AQ 1.3042164 sec  
RG 256  
DW 19.900 usec  
DE 6.50 usec  
TE 300.0 K  
D1 2.0000000 sec  
d11 0.0300000 sec  
d12 0.0000200 sec

## ===== CHANNEL f1 =====

NUC1 13C  
P1 10.20 usec  
PL1 0.00 dB  
SF01 100.6237959 MHz

## ===== CHANNEL f2 =====

CPDPRG2 waltz16  
NUC2 1H  
PCPD2 90.00 usec  
PL2 -3.00 dB  
PL12 14.50 dB  
PL13 17.50 dB  
SF02 400.1326008 MHz

## F2 - Processing parameters

SI 32768  
SF 100.6127715 MHz  
WDW EM  
SSB 0  
LB 0.30 Hz  
GB 0  
PC 1.40

## 1D NMR plot parameters

CX 20.00 cm  
F1P 220.000 ppm  
F1 22134.81 Hz  
F2P 0.000 ppm  
F2 0.00 Hz  
PPMCM 11.00000 ppm/cm  
HZCM 1106.74048 Hz/cm

Fig S64. <sup>1</sup>H NMR (CDCl<sub>3</sub>, 400 MHz) of compound 2h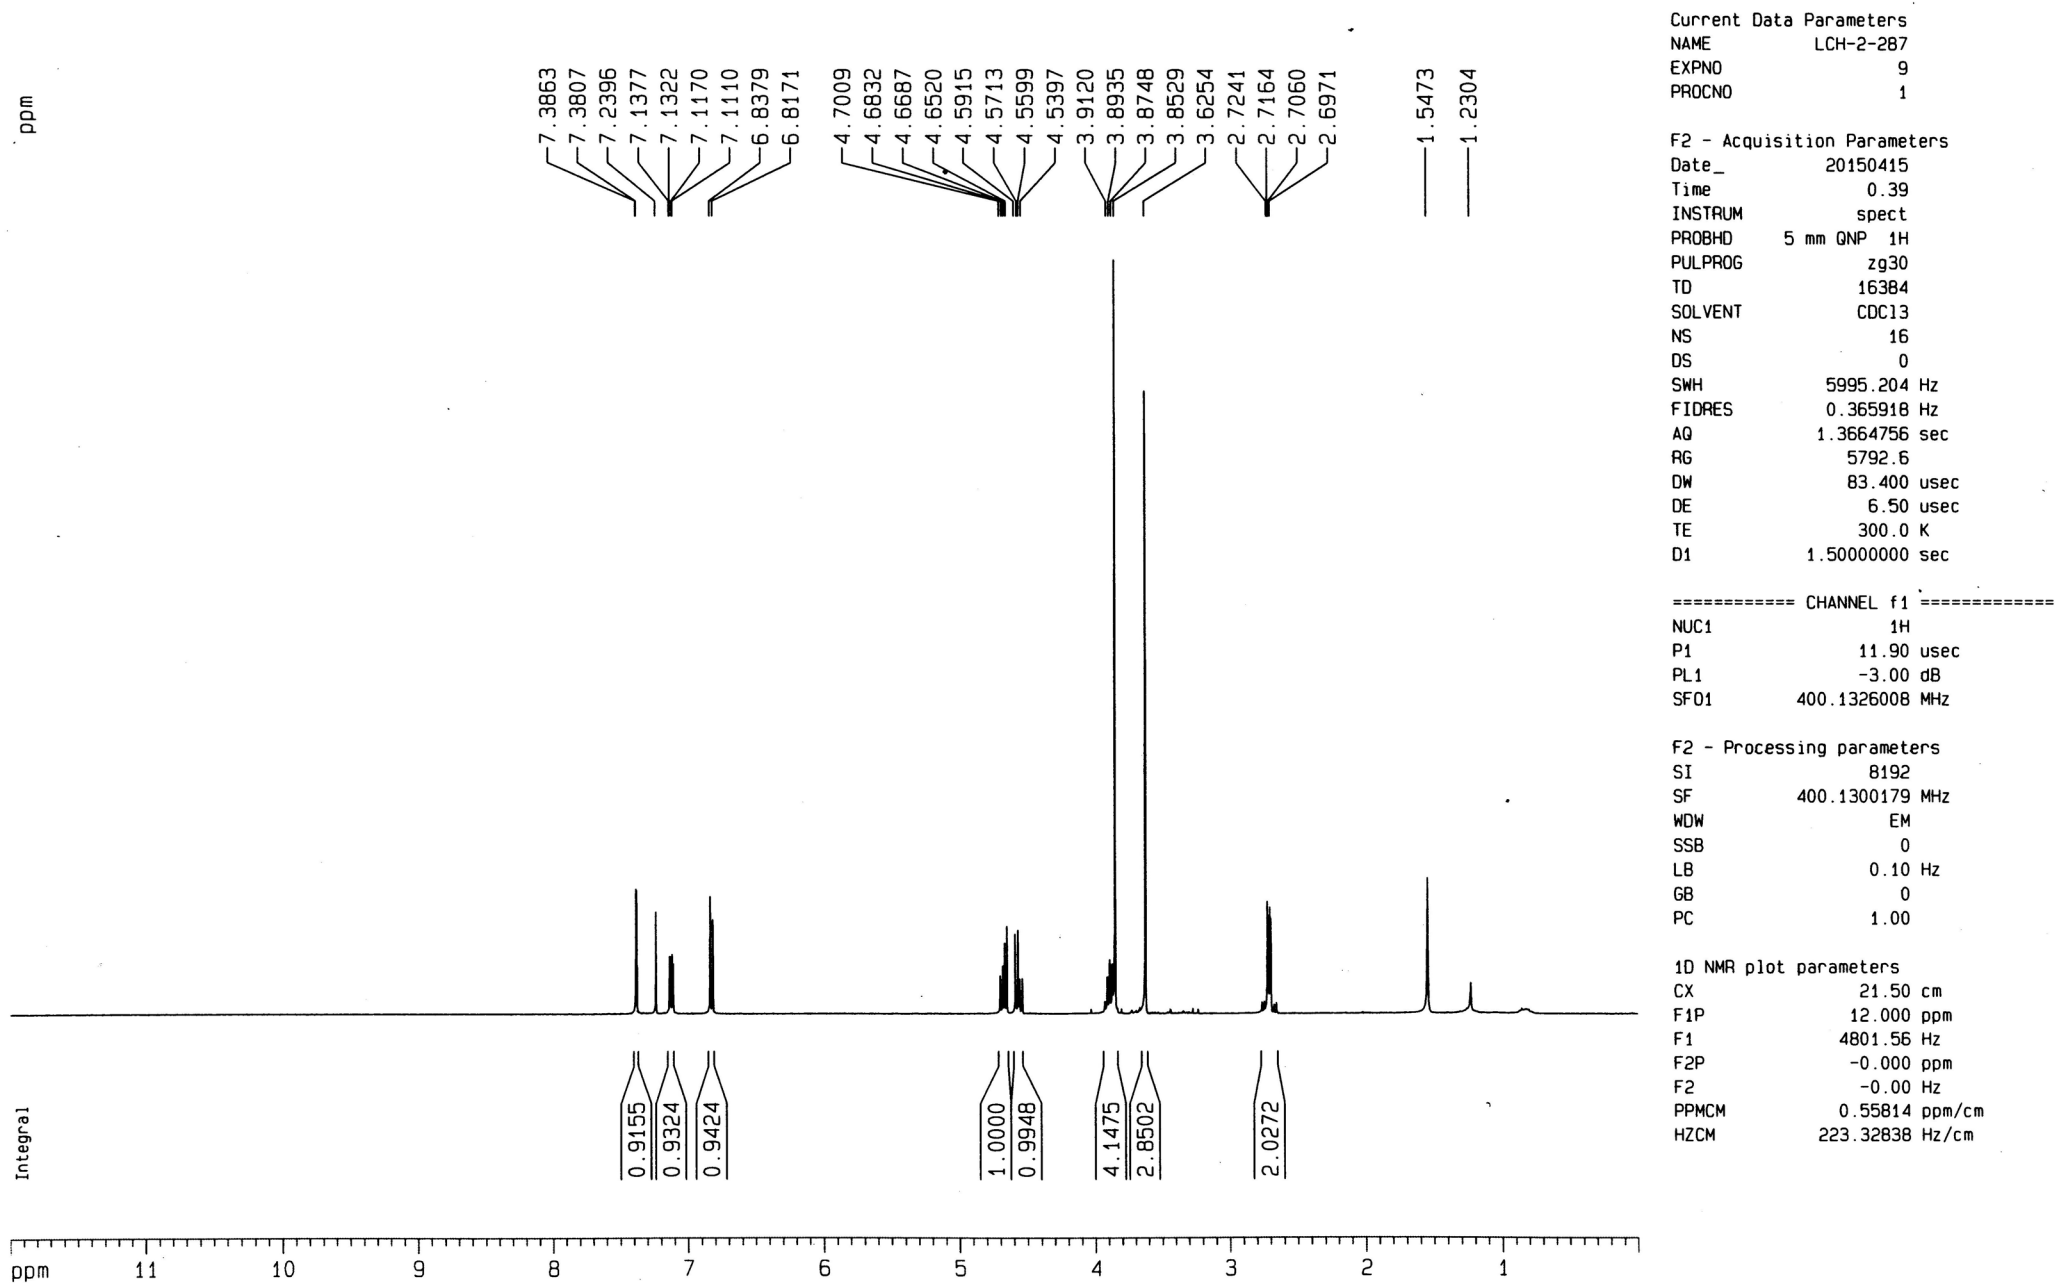

## C13 spectrum of

Fig S65. 13C NMR (CDCl3, 100 MHz) of compound 2h

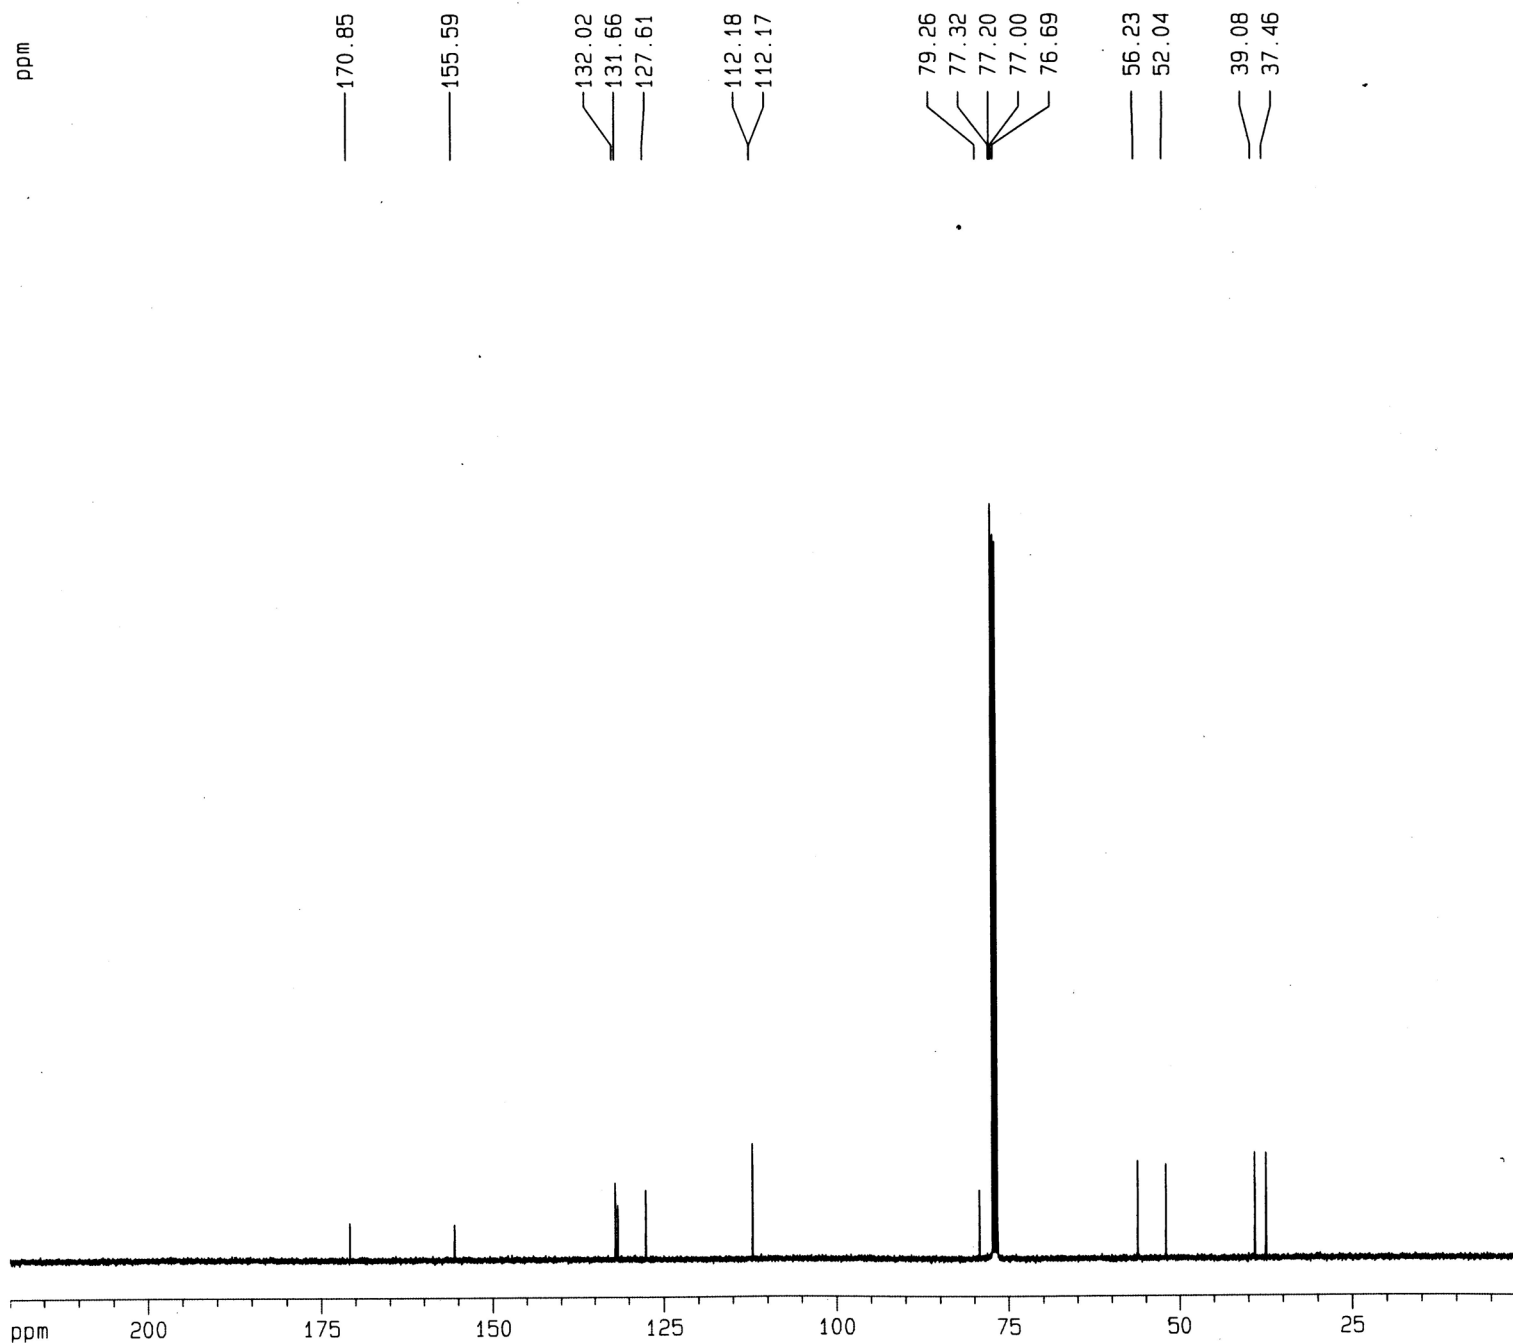

Current Data Parameters  
NAME LCH-2-287  
EXPNO 10  
PROCNO 1

F2 - Acquisition Parameters  
Date\_ 20150415  
Time 4.03  
INSTRUM spect  
PROBHD 5 mm QNP 1H  
PULPROG zgpg30  
TD 65536  
SOLVENT CDCl3  
NS 3686  
DS 4  
SWH 25125.629 Hz  
FIDRES 0.383387 Hz  
AQ 1.3042164 sec  
RG 256  
DW 19.900 usec  
DE 6.50 usec  
TE 300.0 K  
D1 2.00000000 sec  
d11 0.03000000 sec  
d12 0.00002000 sec

==== CHANNEL f1 =====  
NUC1 13C  
P1 10.20 usec  
PL1 0.00 dB  
SF01 100.6237959 MHz

==== CHANNEL f2 =====  
CPDPRG2 waltz16  
NUC2 1H  
PCPD2 90.00 usec  
PL2 -3.00 dB  
PL12 14.50 dB  
PL13 17.50 dB  
SF02 400.1326008 MHz

F2 - Processing parameters  
SI 32768  
SF 100.6127715 MHz  
WDW EM  
SSB 0  
LB 0.30 Hz  
GB 0  
PC 1.40

1D NMR plot parameters  
CX 20.00 cm  
F1P 220.000 ppm  
F1 22134.81 Hz  
F2P 0.000 ppm  
F2 0.00 Hz  
PPMCM 11.00000 ppm/cm  
HZCM 1106.74048 Hz/cm

Fig S66. DEPT of compound 2h

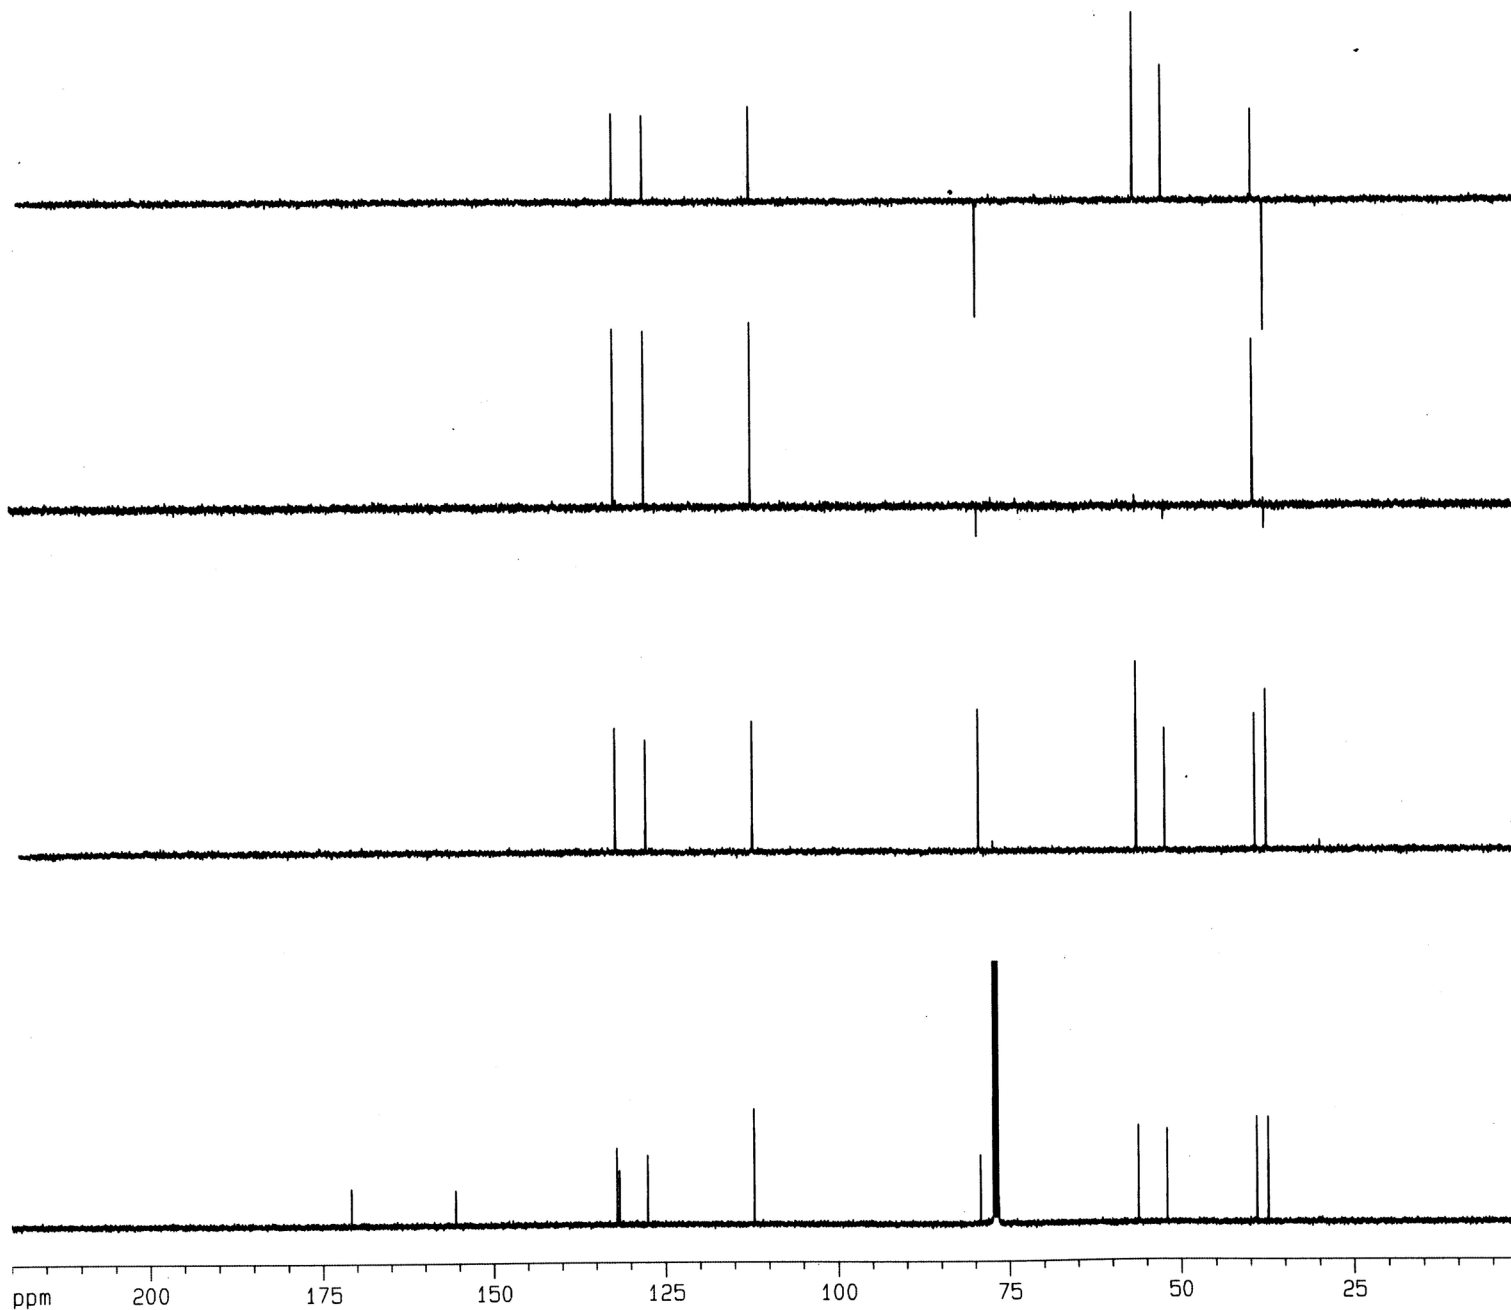

Current Data Parameters  
 NAME LCH-2-287  
 EXPNO 10  
 PROCNO 1

F2 - Acquisition Parameters  
 Date\_ 20150415  
 Time 4.03  
 INSTRUM spect  
 PROBHD 5 mm QNP 1H  
 PULPROG zgpg30  
 TD 65536  
 SOLVENT CDC13  
 NS 3686  
 DS 4  
 SWH 25125.629 Hz  
 FIDRES 0.383387 Hz  
 AQ 1.3042164 sec  
 RG 256  
 DW 19.900 usec  
 DE 6.50 usec  
 TE 300.0 K  
 D1 2.0000000 sec  
 d11 0.0300000 sec  
 d12 0.0000200 sec

===== CHANNEL f1 =====  
 NUC1 13C  
 P1 10.20 usec  
 PL1 0.00 dB  
 SF01 100.6237959 MHz

===== CHANNEL f2 =====  
 CPDPRG2 waltz16  
 NUC2 1H  
 PCPD2 90.00 usec  
 PL2 -3.00 dB  
 PL12 14.50 dB  
 PL13 17.50 dB  
 SF02 400.1326008 MHz

F2 - Processing parameters  
 SI 32768  
 SF 100.6127715 MHz  
 WDW EM  
 SSB 0  
 LB 0.30 Hz  
 GB 0  
 PC 1.40

1D NMR plot parameters  
 CX 20.00 cm  
 F1P 220.000 ppm  
 F1 22134.81 Hz  
 F2P 0.000 ppm  
 F2 0.00 Hz  
 PPMCM 11.00000 ppm/cm  
 HZCM 1106.74048 Hz/cm

Fig S67. <sup>1</sup>H NMR (acetone-d<sub>6</sub>, 400 MHz NMR) of compound 2i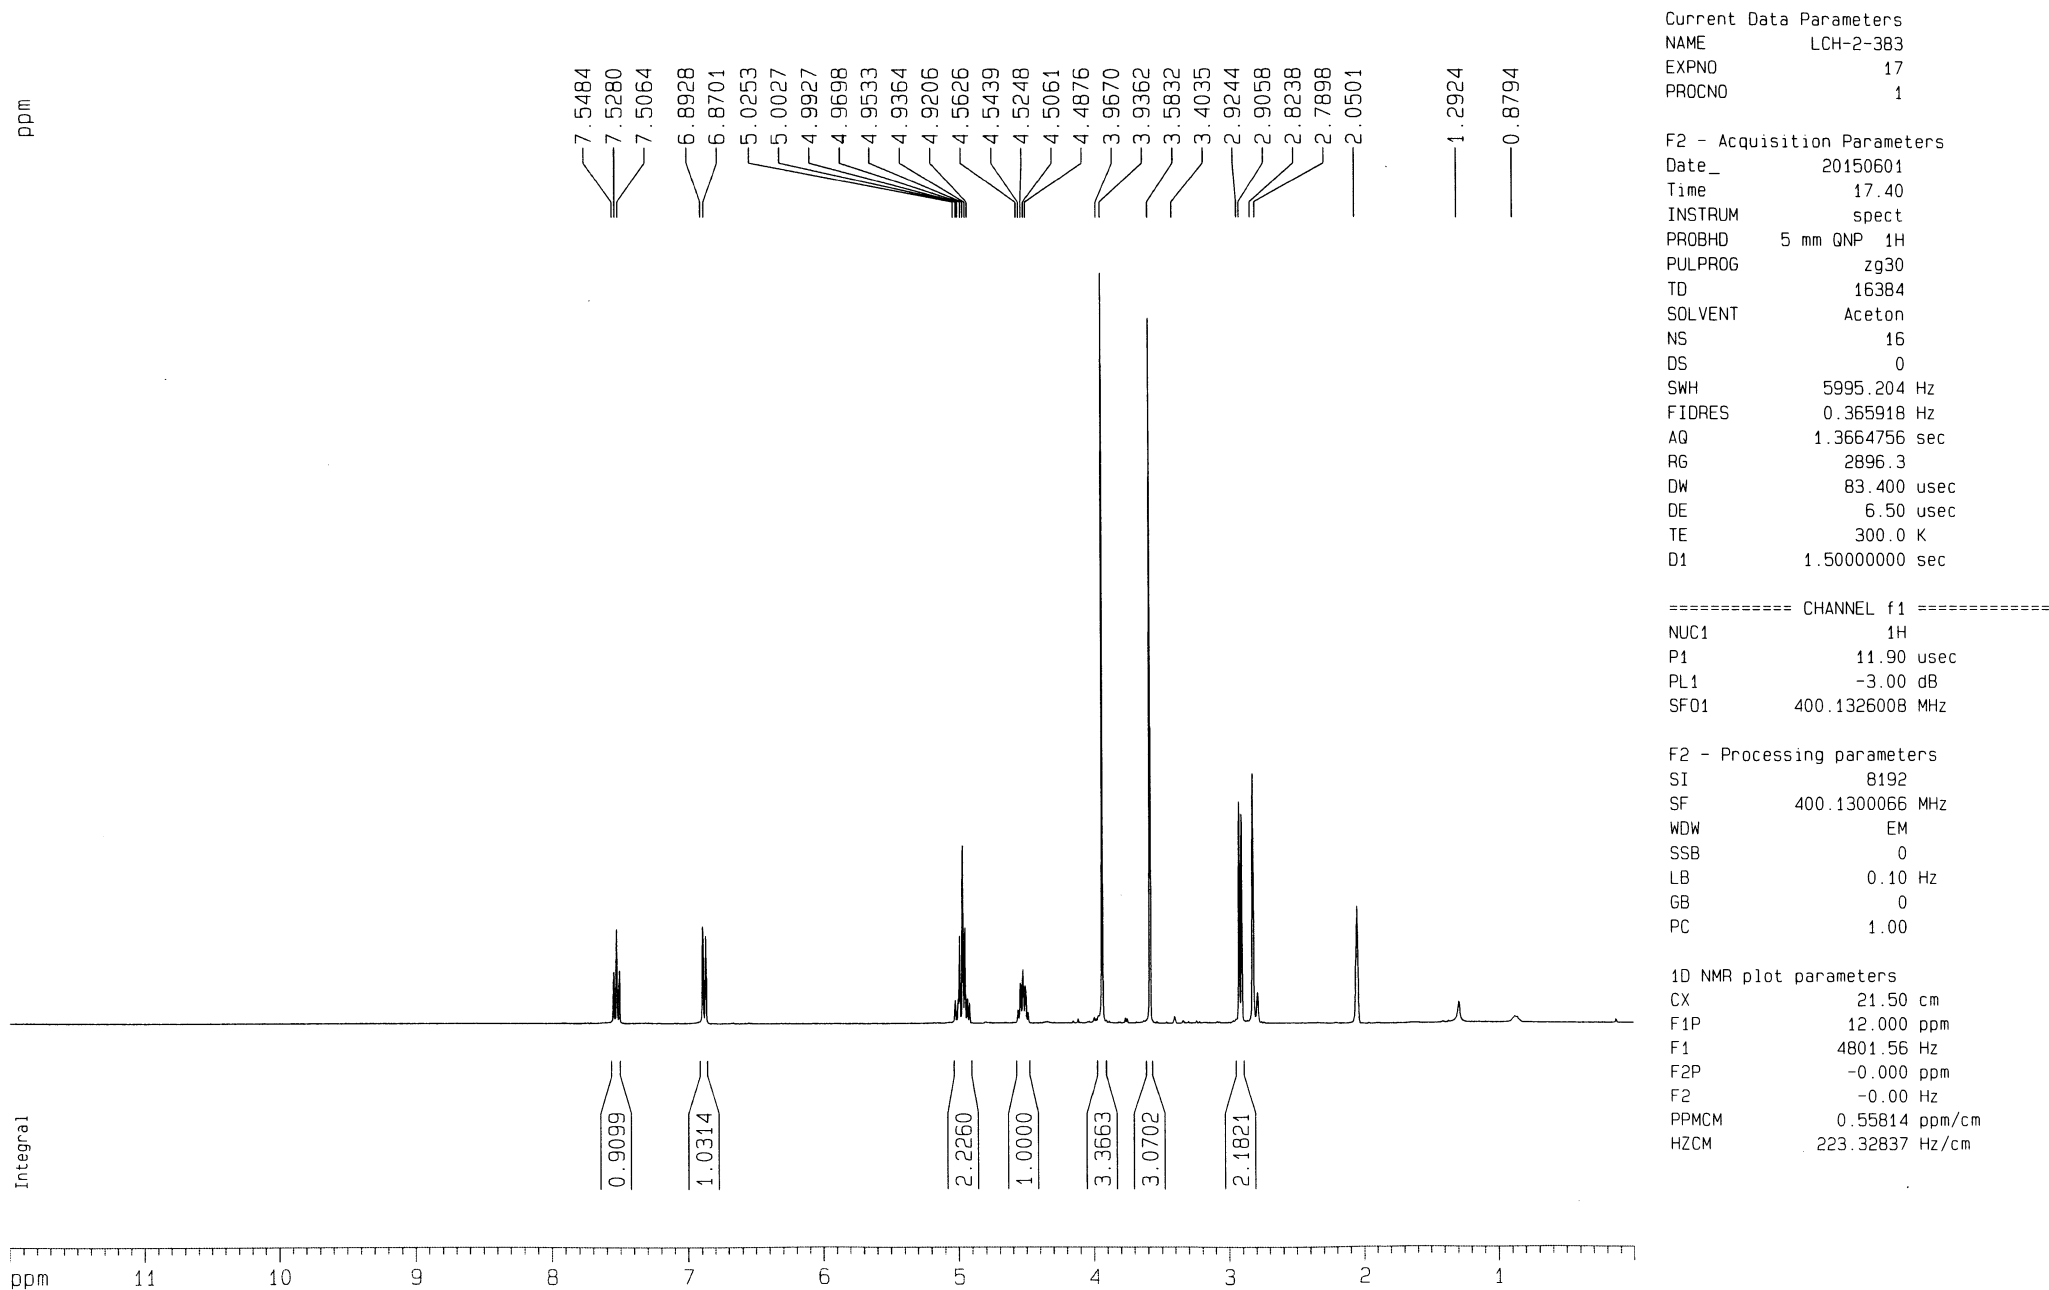

## C13 spectrum of

Fig S68. 13C NMR (acetone-d6, 100 MHz) of compound 2i

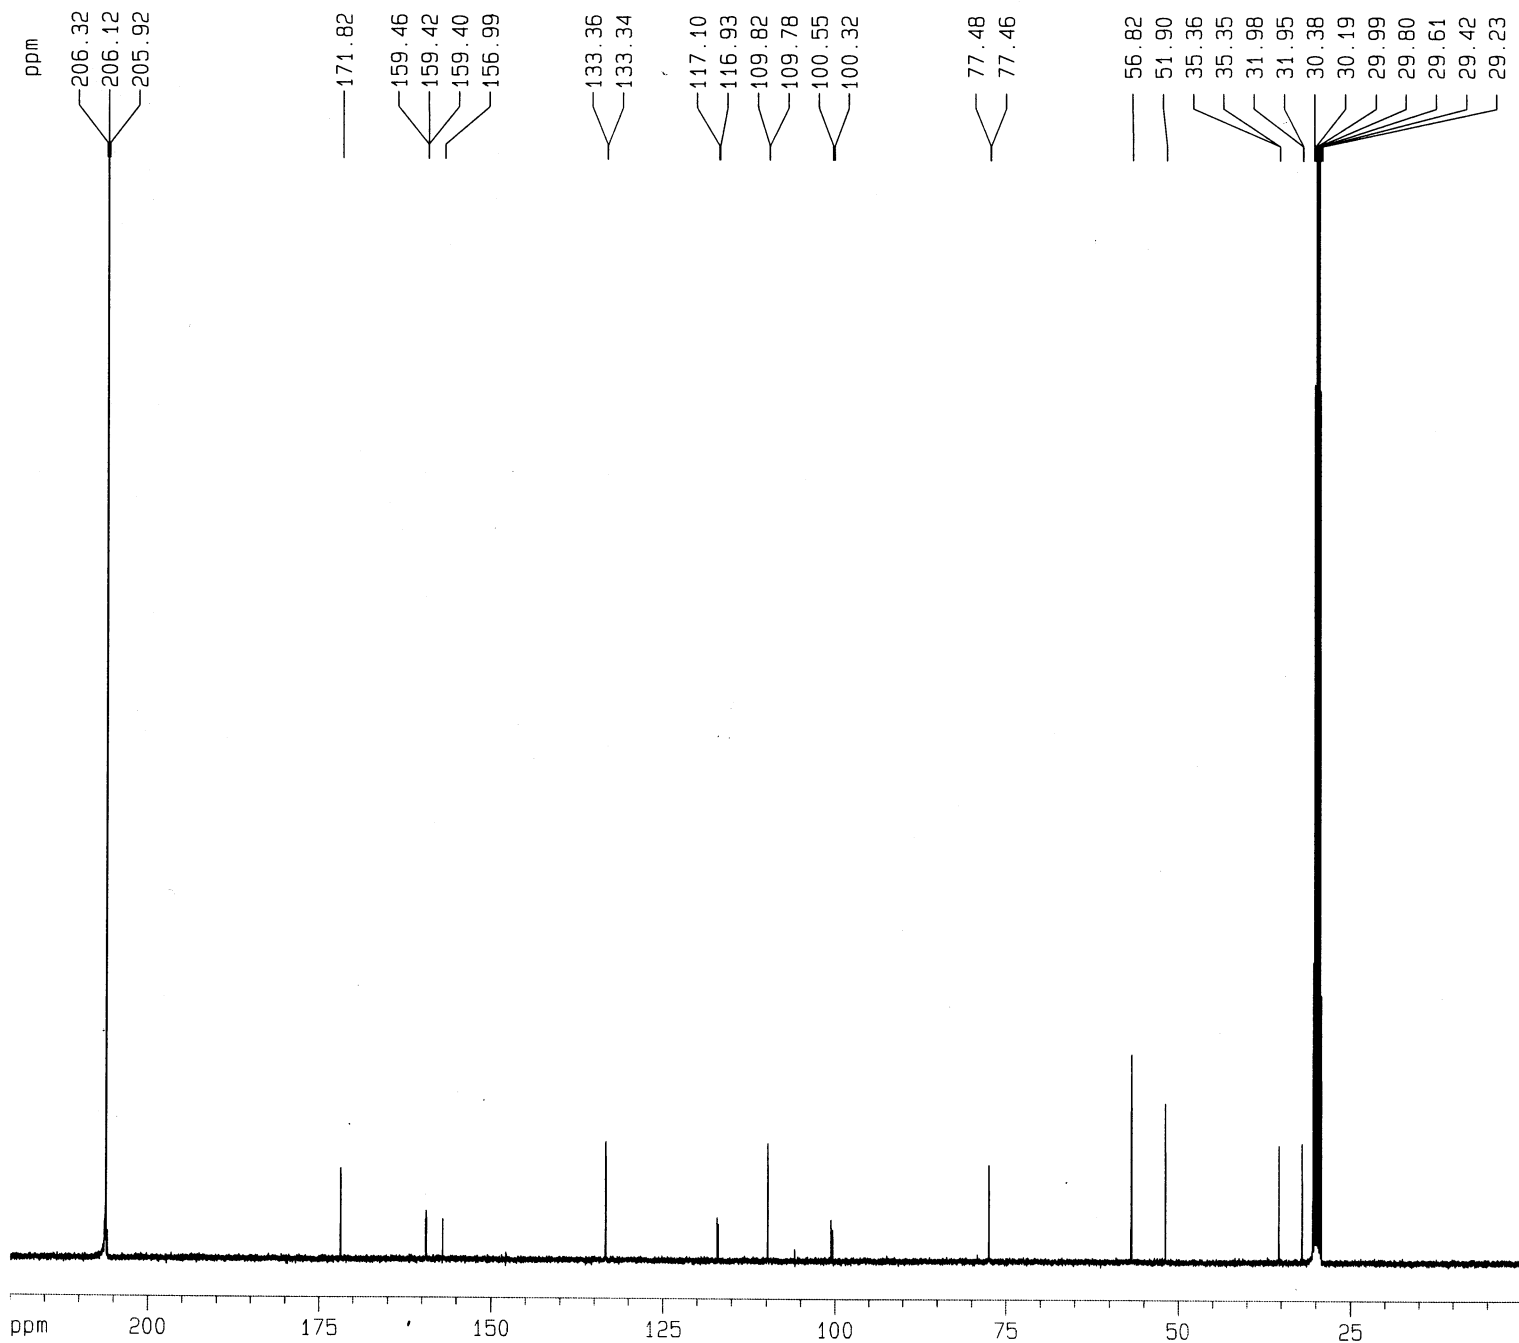

## Current Data Parameters

NAME LCH-2-383  
EXPNO 13  
PROCNO 1

## F2 - Acquisition Parameters

Date\_ 20150423  
Time 3.47  
INSTRUM spect  
PROBHD 5 mm QNP 1H  
PULPROG zgpg30  
TD 65536  
SOLVENT CDC13  
NS 3686  
DS 4  
SWH 25125.629 Hz  
FIDRES 0.383387 Hz  
AQ 1.3042164 sec  
RG 256  
DW 19.900 usec  
DE 6.50 usec  
TE 300.0 K  
D1 2.00000000 sec  
d11 0.03000000 sec  
d12 0.00002000 sec

## ===== CHANNEL f1 =====

NUC1 13C  
P1 10.20 usec  
PL1 0.00 dB  
SF01 100.6237959 MHz

## ===== CHANNEL f2 =====

CPDPRG2 waltz16  
NUC2 1H  
PCPD2 90.00 usec  
PL2 -3.00 dB  
PL12 14.50 dB  
PL13 17.50 dB  
SF02 400.1326008 MHz

## F2 - Processing parameters

SI 32768  
SF 100.6126837 MHz  
WDW EM  
SSB 0  
LB 0.30 Hz  
GB 0  
PC 1.40

## 1D NMR plot parameters

CX 20.00 cm  
F1P 220.000 ppm  
F1 22134.79 Hz  
F2P 0.000 ppm  
F2 0.00 Hz  
PPMCM 11.00000 ppm/cm  
HZCM 1106.73950 Hz/cm



Fig S69. DEPT of compound 2i

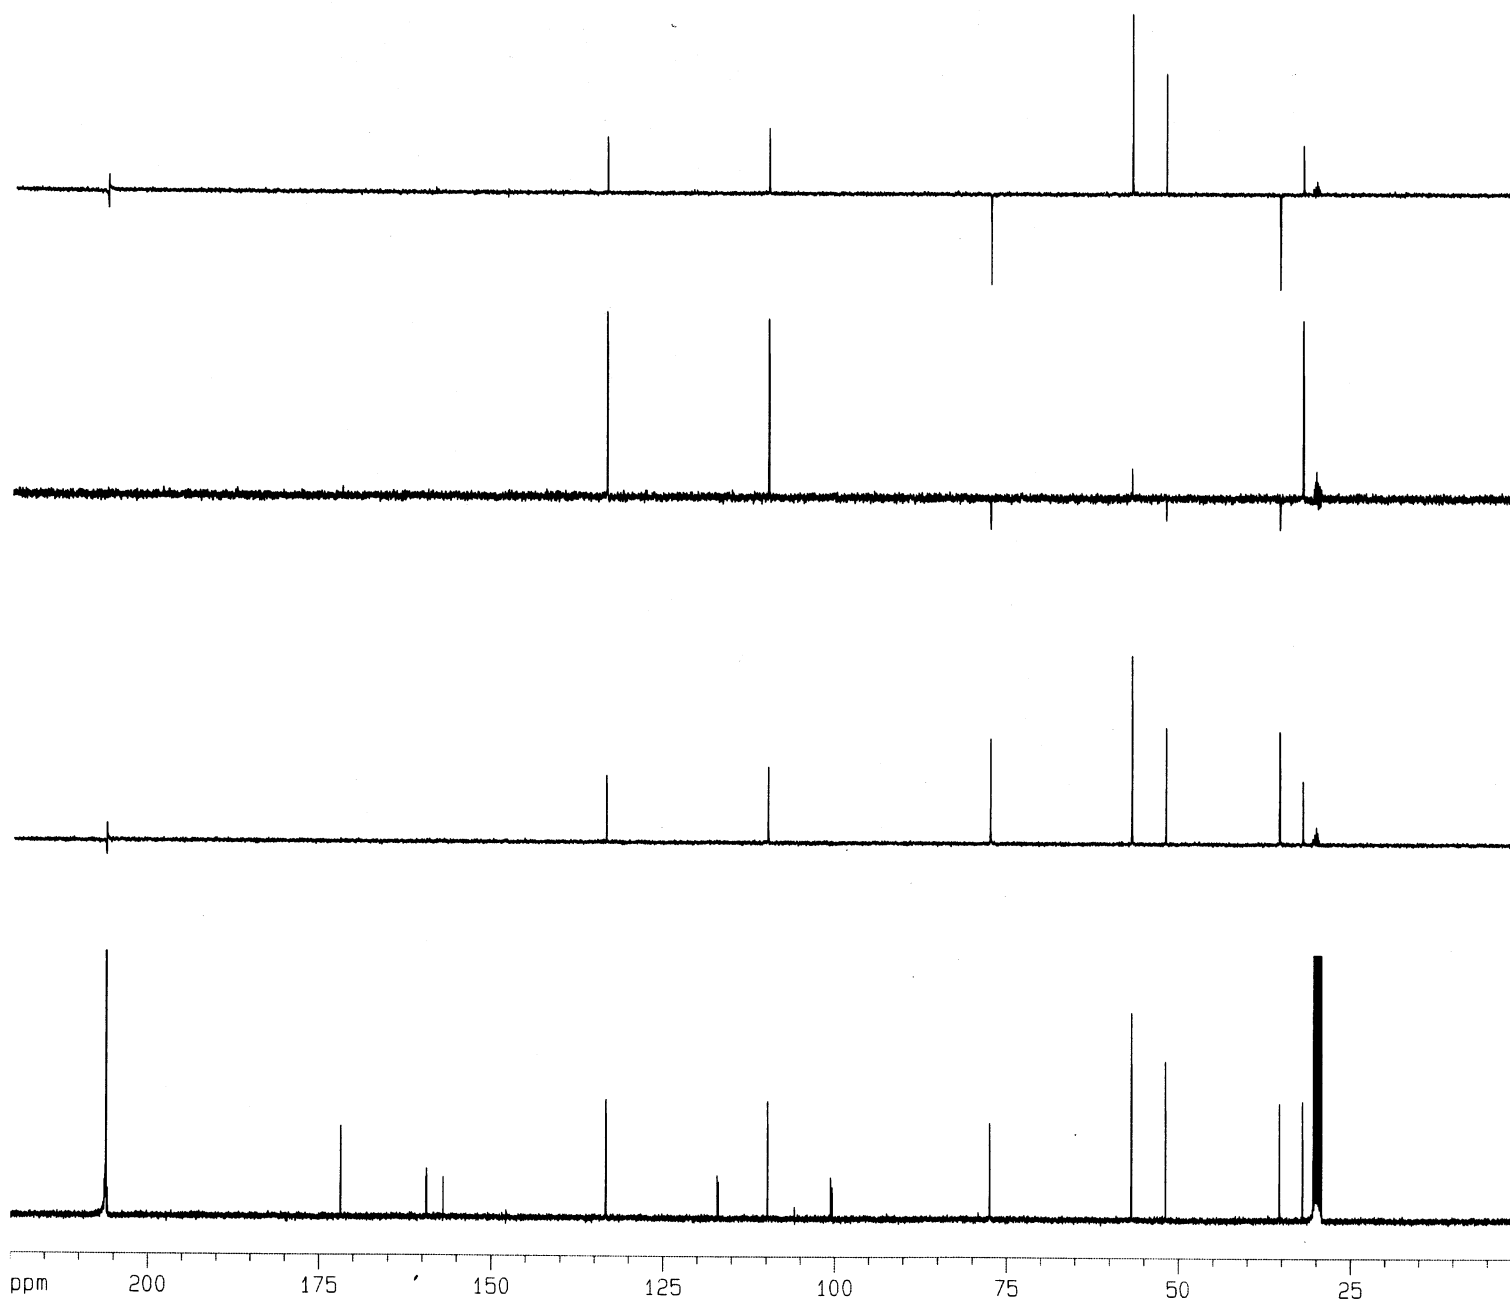

Current Data Parameters  
 NAME LCH-2-383  
 EXPNO 13  
 PROCNO 1

F2 - Acquisition Parameters  
 Date\_ 20150423  
 Time 3.47  
 INSTRUM spect  
 PROBHD 5 mm QNP 1H  
 PULPROG zgpg30  
 TD 65536  
 SOLVENT CDC13  
 NS 3686  
 DS 4  
 SWH 25125.629 Hz  
 FIDRES 0.383387 Hz  
 AQ 1.3042164 sec  
 RG 256  
 DW 19.900 usec  
 DE 6.50 usec  
 TE 300.0 K  
 D1 2.00000000 sec  
 d11 0.03000000 sec  
 d12 0.00002000 sec

===== CHANNEL f1 =====  
 NUC1 13C  
 P1 10.20 usec  
 PL1 0.00 dB  
 SF01 100.6237959 MHz

===== CHANNEL f2 =====  
 CPDPRG2 waltz16  
 NUC2 1H  
 PCPD2 90.00 usec  
 PL2 -3.00 dB  
 PL12 14.50 dB  
 PL13 17.50 dB  
 SF02 400.1326008 MHz

F2 - Processing parameters  
 SI 32768  
 SF 100.6126837 MHz  
 WDW EM  
 SSB 0  
 LB 0.30 Hz  
 GB 0  
 PC 1.40

1D NMR plot parameters  
 CX 20.00 cm  
 F1P 220.000 ppm  
 F1 22134.79 Hz  
 F2P 0.000 ppm  
 F2 0.00 Hz  
 PPMCM 11.00000 ppm/cm  
 HZCM 1106.73950 Hz/cm

Fig S70. <sup>1</sup>H NMR (CDCl<sub>3</sub>, 400 MHz) of compound syn-3a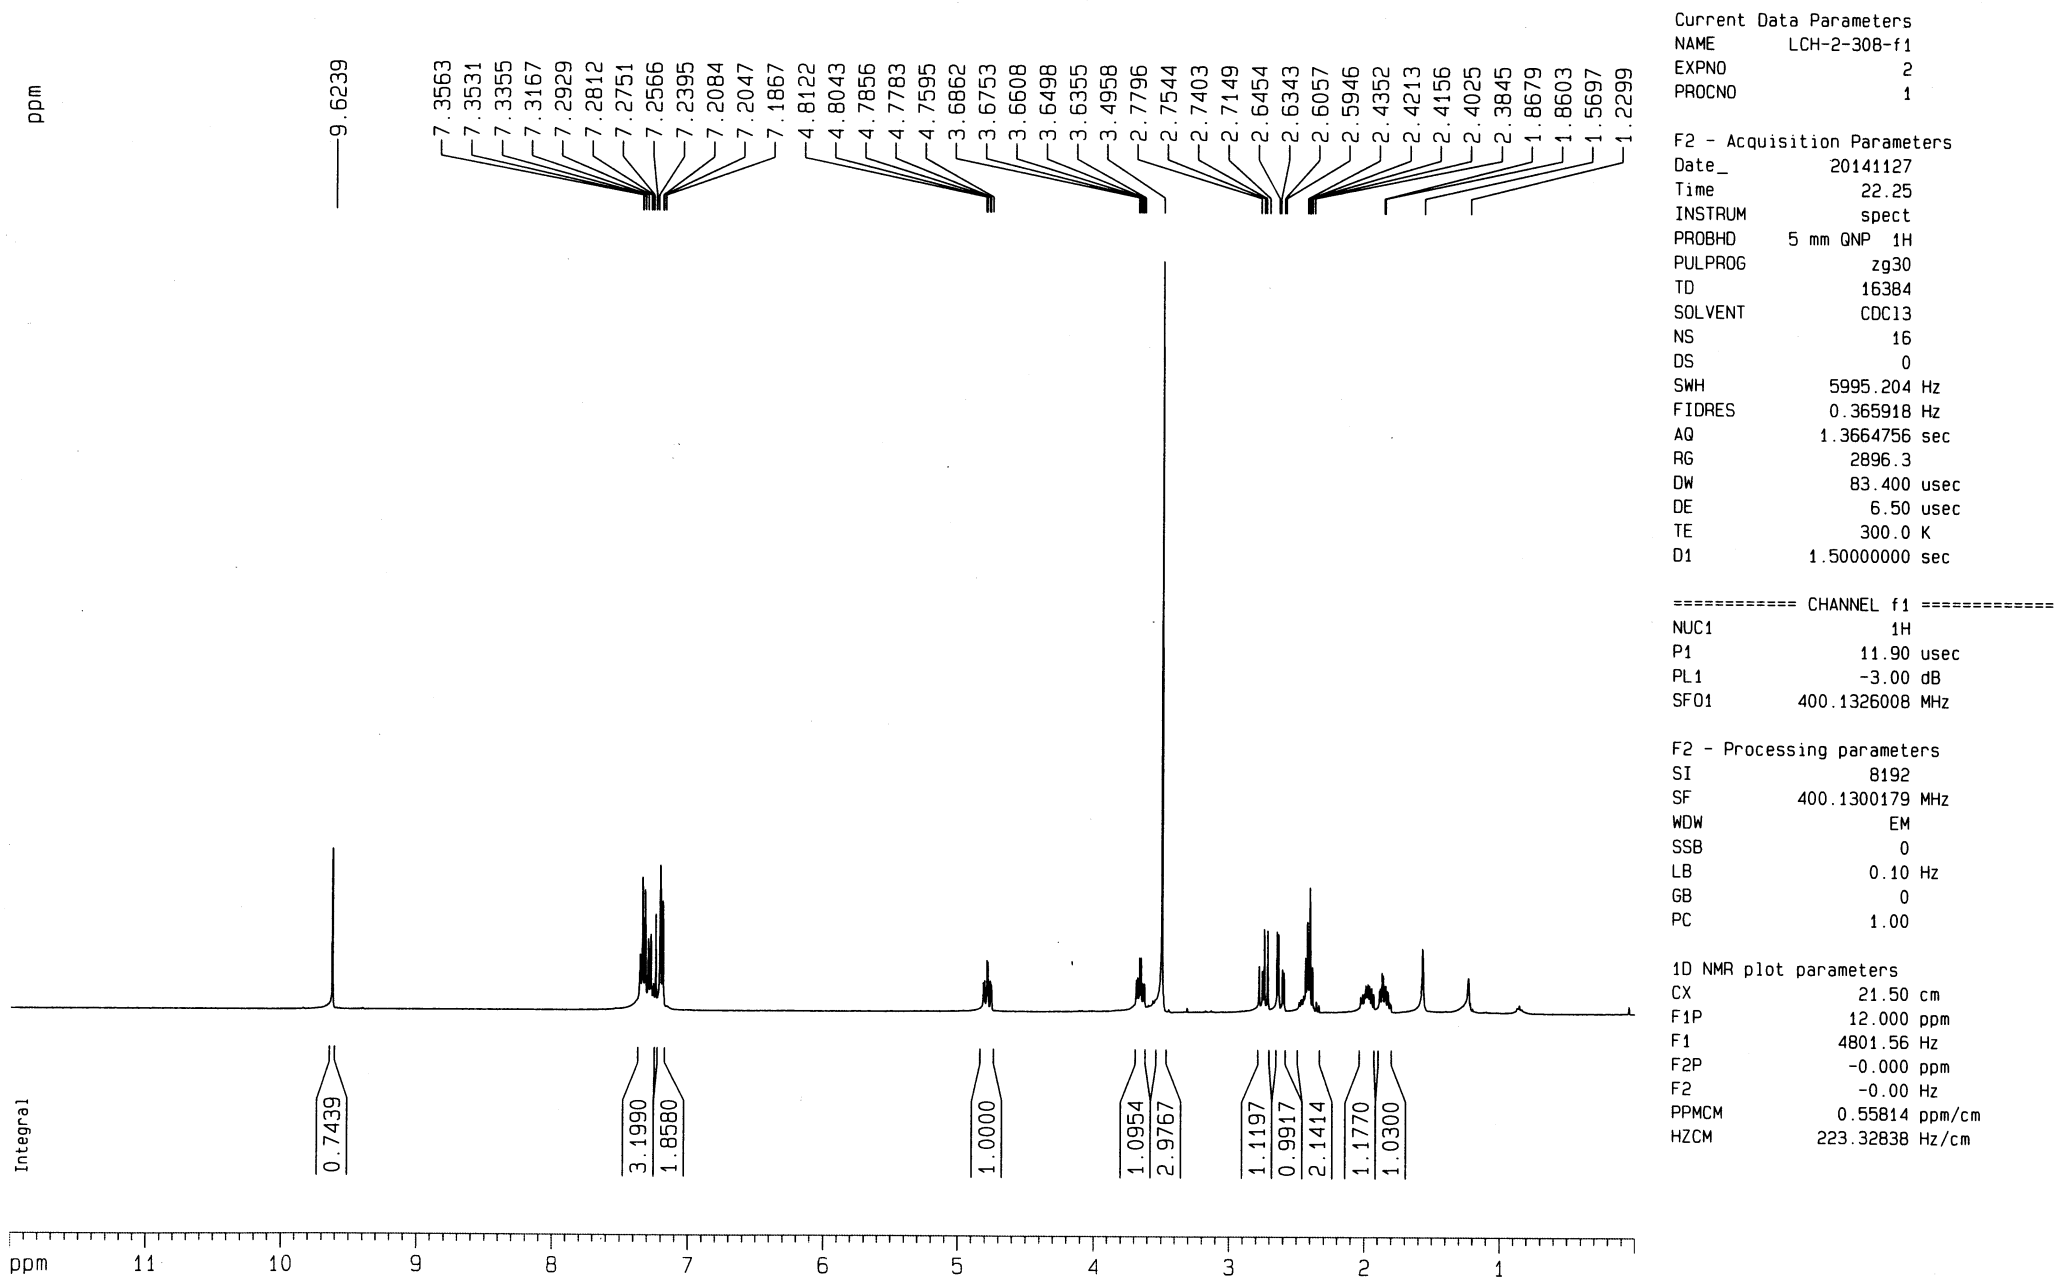

## C13 spectrum of

Fig S71. 13C NMR (CDCl3, 100 MHz) of compound syn-3a

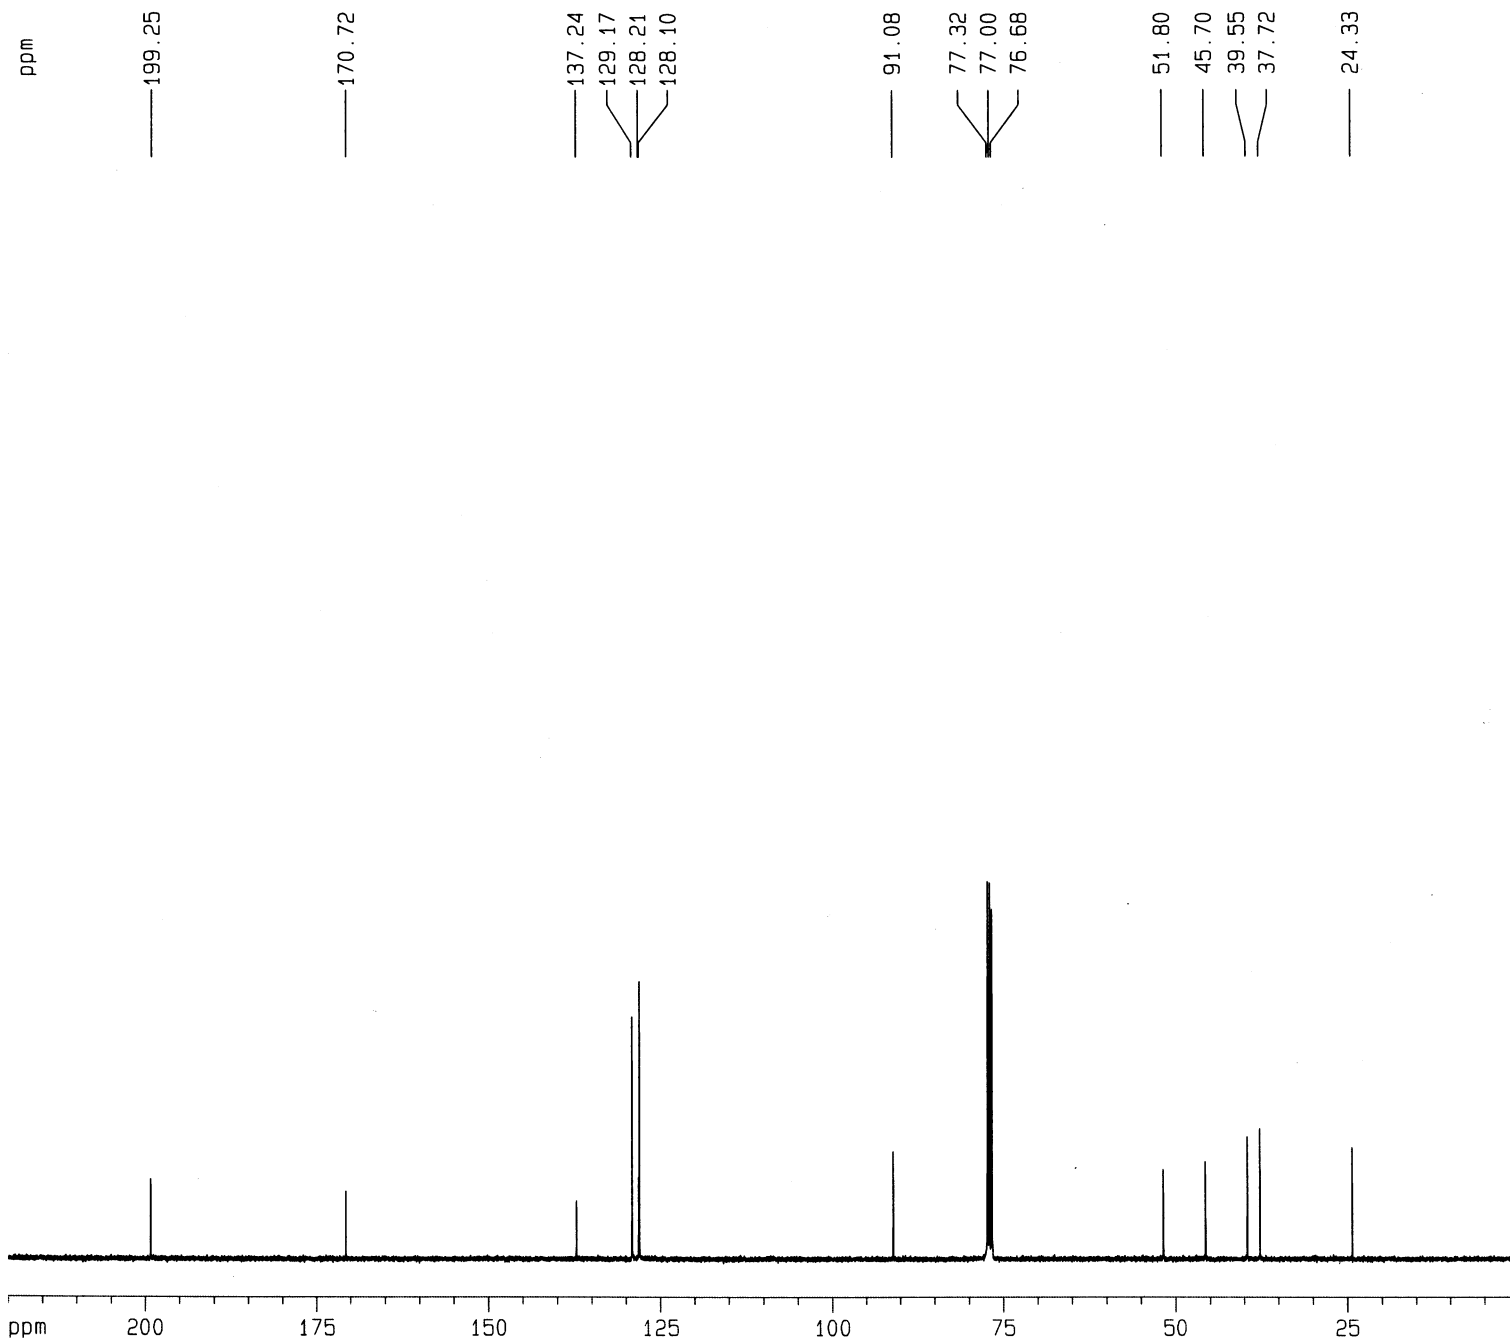

Current Data Parameters  
 NAME LCH-2-308-f1  
 EXPNO 3  
 PROCNO 1

F2 - Acquisition Parameters  
 Date\_ 20141128  
 Time 1.52  
 INSTRUM spect  
 PROBHD 5 mm QNP 1H  
 PULPROG zgpg30  
 TD 65536  
 SOLVENT CDCl3  
 NS 3686  
 DS 4  
 SWH 25125.629 Hz  
 FIDRES 0.383387 Hz  
 AQ 1.3042164 sec  
 RG 256  
 DW 19.900 usec  
 DE 6.50 usec  
 TE 300.0 K  
 D1 2.0000000 sec  
 d11 0.03000000 sec  
 d12 0.00002000 sec

===== CHANNEL f1 =====  
 NUC1 13C  
 P1 10.20 usec  
 PL1 0.00 dB  
 SF01 100.6237959 MHz

===== CHANNEL f2 =====  
 CPDPRG2 waltz16  
 NUC2 1H  
 PCPD2 90.00 usec  
 PL2 -3.00 dB  
 PL12 14.50 dB  
 PL13 17.50 dB  
 SF02 400.1326008 MHz

F2 - Processing parameters  
 SI 32768  
 SF 100.6127715 MHz  
 WDW EM  
 SSB 0  
 LB 0.30 Hz  
 GB 0  
 PC 1.40

1D NMR plot parameters  
 CX 20.00 cm  
 F1P 220.000 ppm  
 F1 22134.81 Hz  
 F2P 0.000 ppm  
 F2 0.00 Hz  
 PPMCM 11.00000 ppm/cm  
 HZCM 1106 74048 Hz/cm

Fig S72. DEPT of compound syn-3a

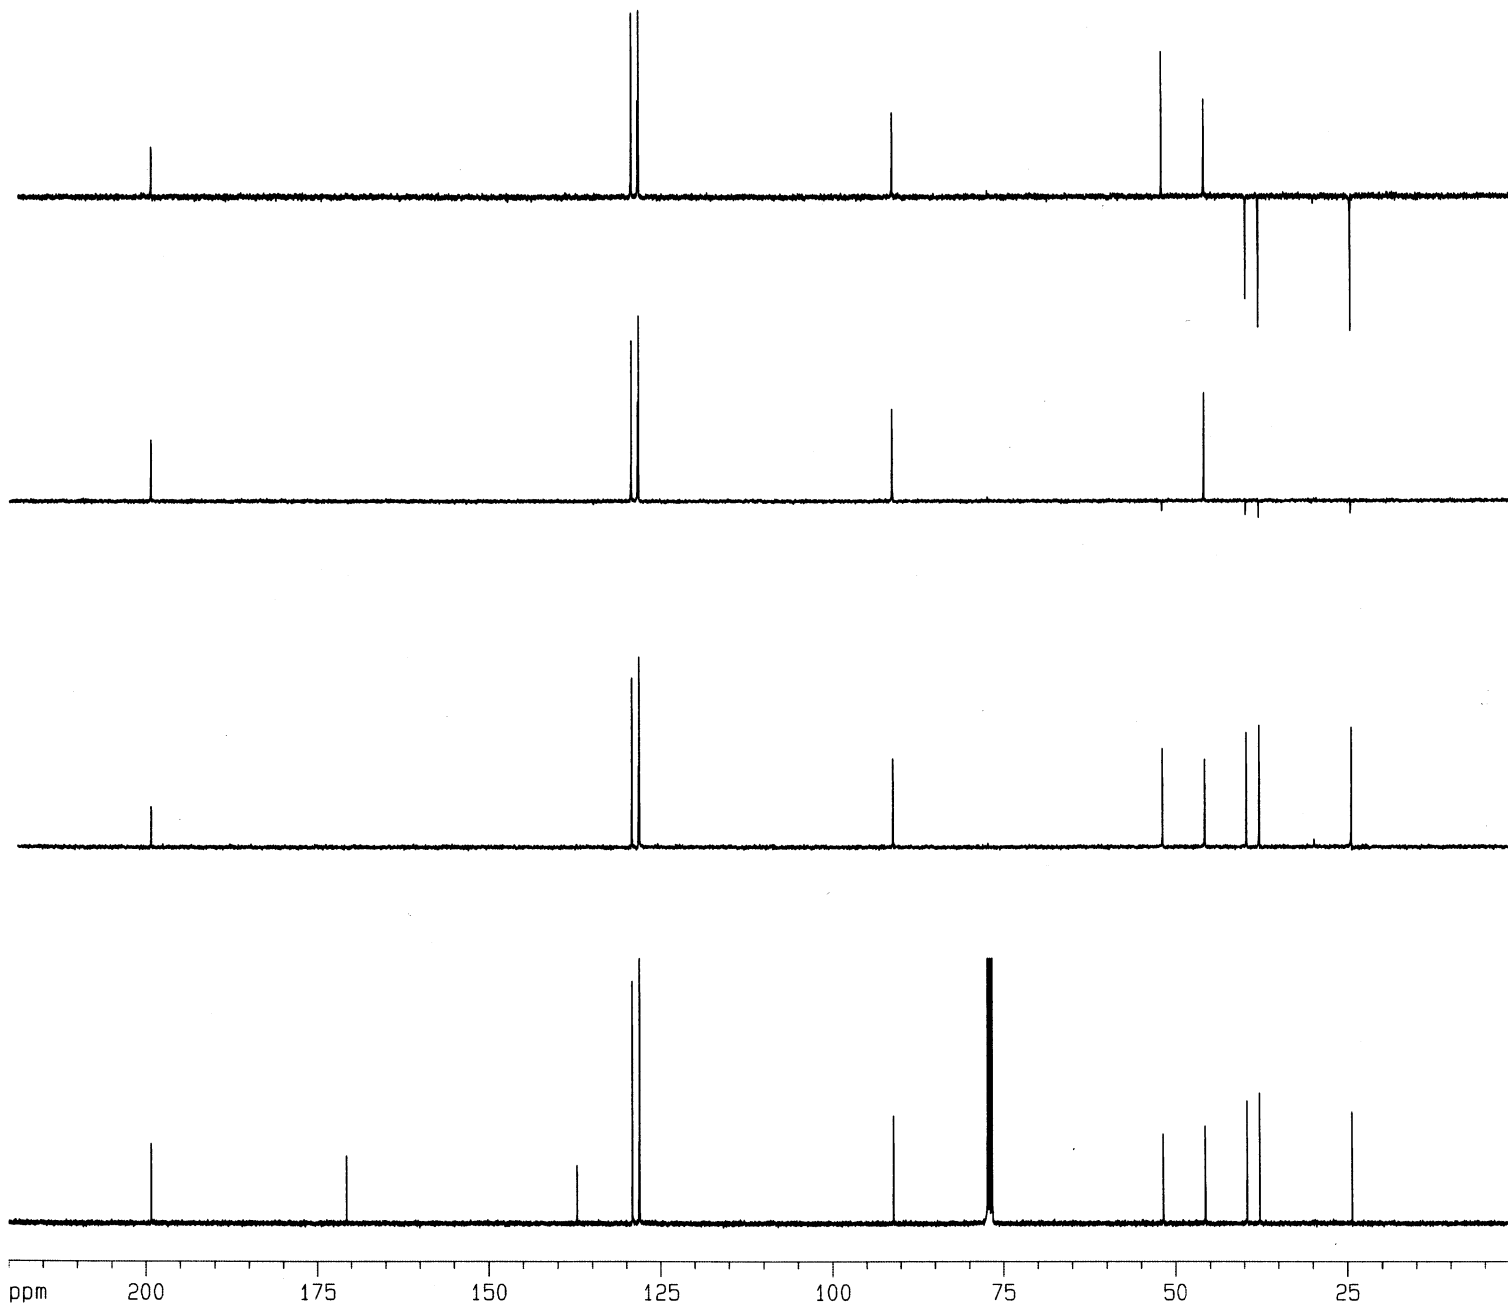

## Current Data Parameters

NAME LCH-2-30B-f1  
EXPNO 3  
PROCNO 1

## F2 - Acquisition Parameters

Date\_ 20141128  
Time 1.52  
INSTRUM spect  
PROBHD 5 mm QNP 1H  
PULPROG zgpg30  
TD 65536  
SOLVENT CDC13  
NS 3686  
DS 4  
SWH 25125.629 Hz  
FIDRES 0.383387 Hz  
AQ 1.3042164 sec  
RG 256  
DW 19.900 usec  
DE 6.50 usec  
TE 300.0 K  
D1 2.00000000 sec  
d11 0.03000000 sec  
d12 0.00002000 sec

## ===== CHANNEL f1 =====

NUC1 13C  
P1 10.20 usec  
PL1 0.00 dB  
SF01 100.6237959 MHz

## ===== CHANNEL f2 =====

CPDPRG2 waltz16  
NUC2 1H  
PCPD2 90.00 usec  
PL2 -3.00 dB  
PL12 14.50 dB  
PL13 17.50 dB  
SF02 400.1326008 MHz

## F2 - Processing parameters

SI 32768  
SF 100.6127715 MHz  
WDW EM  
SSB 0  
LB 0.30 Hz  
GB 0  
PC 1.40

## 1D NMR plot parameters

CX 20.00 cm  
F1P 220.000 ppm  
F1 22134.81 Hz  
F2P 0.000 ppm  
F2 0.00 Hz  
PPMCM 11.00000 ppm/cm  
HZCM 1106.74048 Hz/cm

Fig S73. <sup>1</sup>H NMR (CDCl<sub>3</sub>, 400 MHz) of compound anti-3a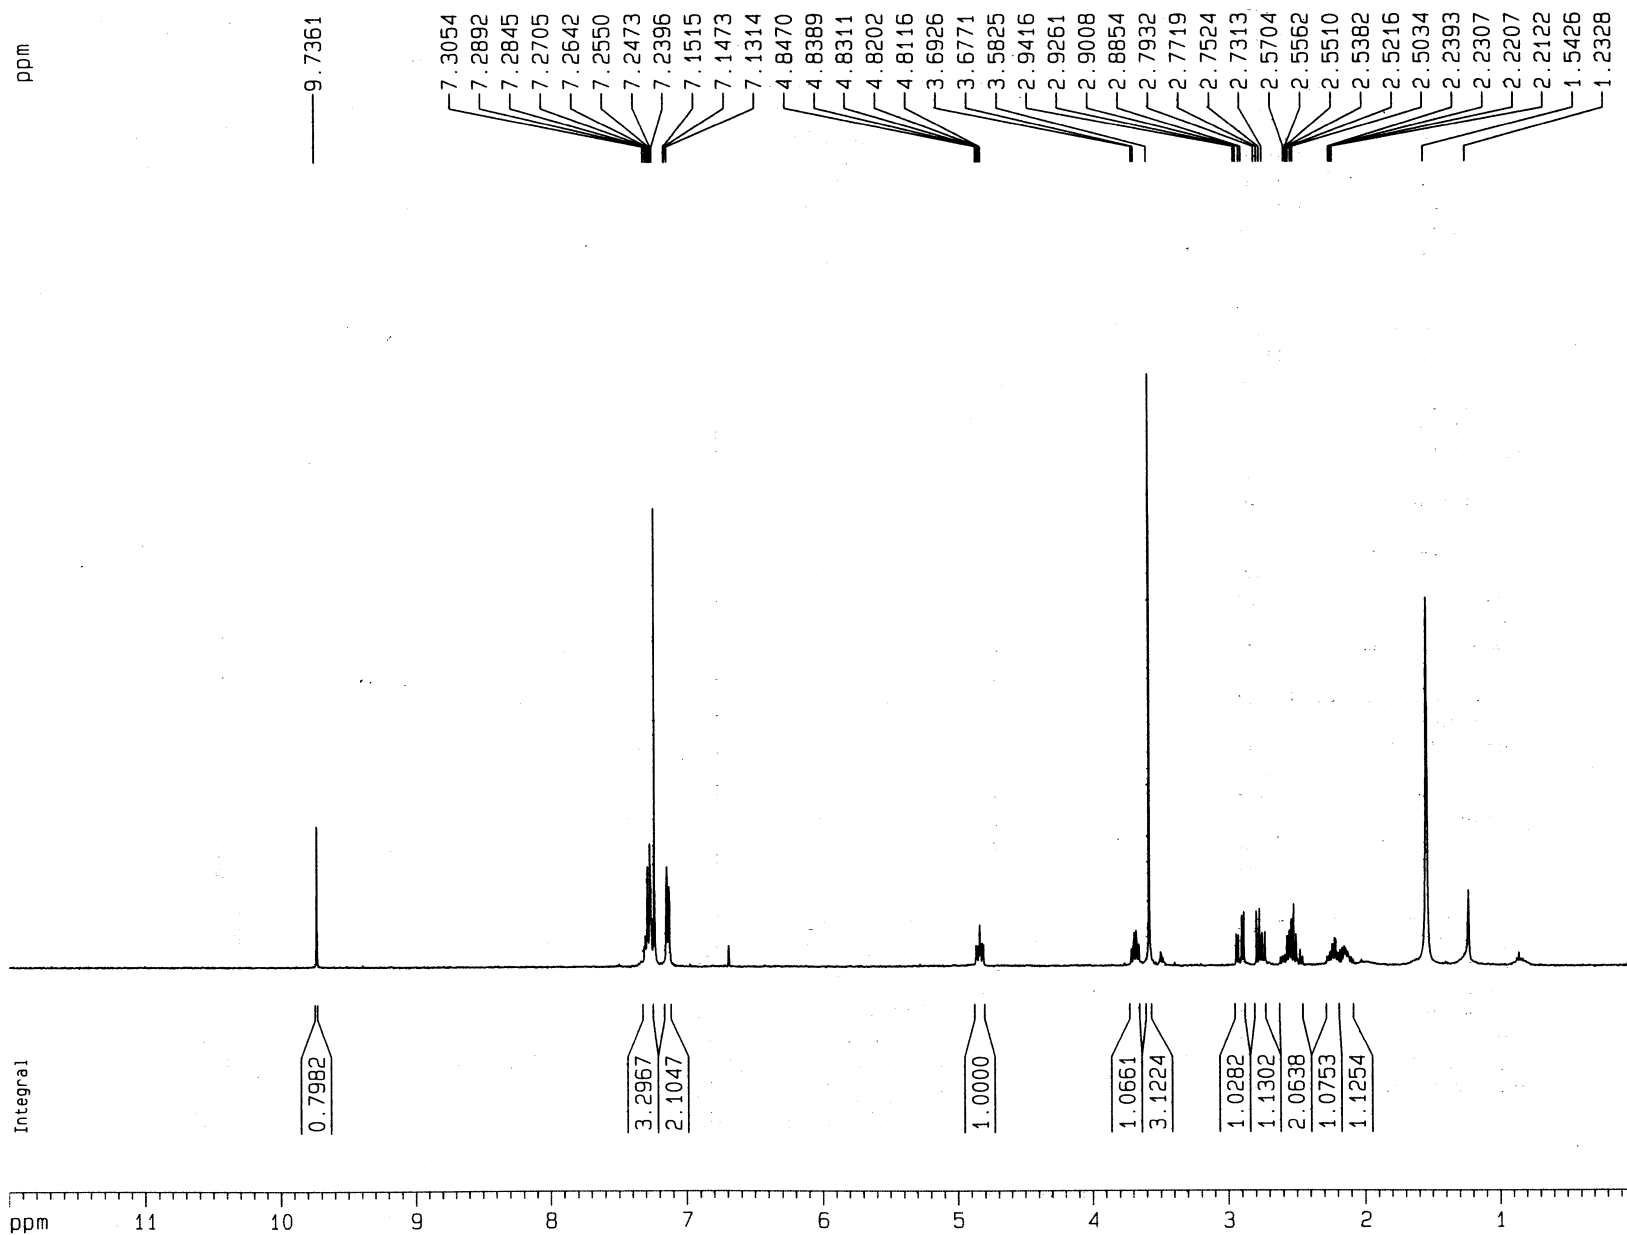

## Current Data Parameters

NAME LCH-2-308-f2  
EXPNO 2  
PROCNO 1

## F2 - Acquisition Parameters

Date\_ 20141205  
Time 14.59  
INSTRUM spect  
PROBHD 5 mm GNP 1H  
PULPROG zg30  
TD 16384  
SOLVENT CDCl3  
NS 16  
DS 0  
SWH 5995.204 Hz  
FIDRES 0.365918 Hz  
AQ 1.3664756 sec  
RG 10321.3  
DW 83.400 usec  
DE 6.50 usec  
TE 300.0 K  
D1 1.5000000 sec

## ===== CHANNEL f1 =====

NUC1 1H  
P1 11.90 usec  
PL1 -3.00 dB  
SF01 400.1326008 MHz

## F2 - Processing parameters

SI 8192  
SF 400.1300179 MHz  
WDW EM  
SSB 0  
LB 0.10 Hz  
GB 0  
PC 1.00

## 1D NMR plot parameters

CX 21.50 cm  
F1P 12.000 ppm  
F1 4801.56 Hz  
F2P -0.000 ppm  
F2 -0.00 Hz  
PPMCM 0.55814 ppm/cm  
HZCM 223.32837 Hz/cm

## C13 spectrum of

Fig S74. 13C NMR (CDCl3, 100 MHz) of compound anti-3a

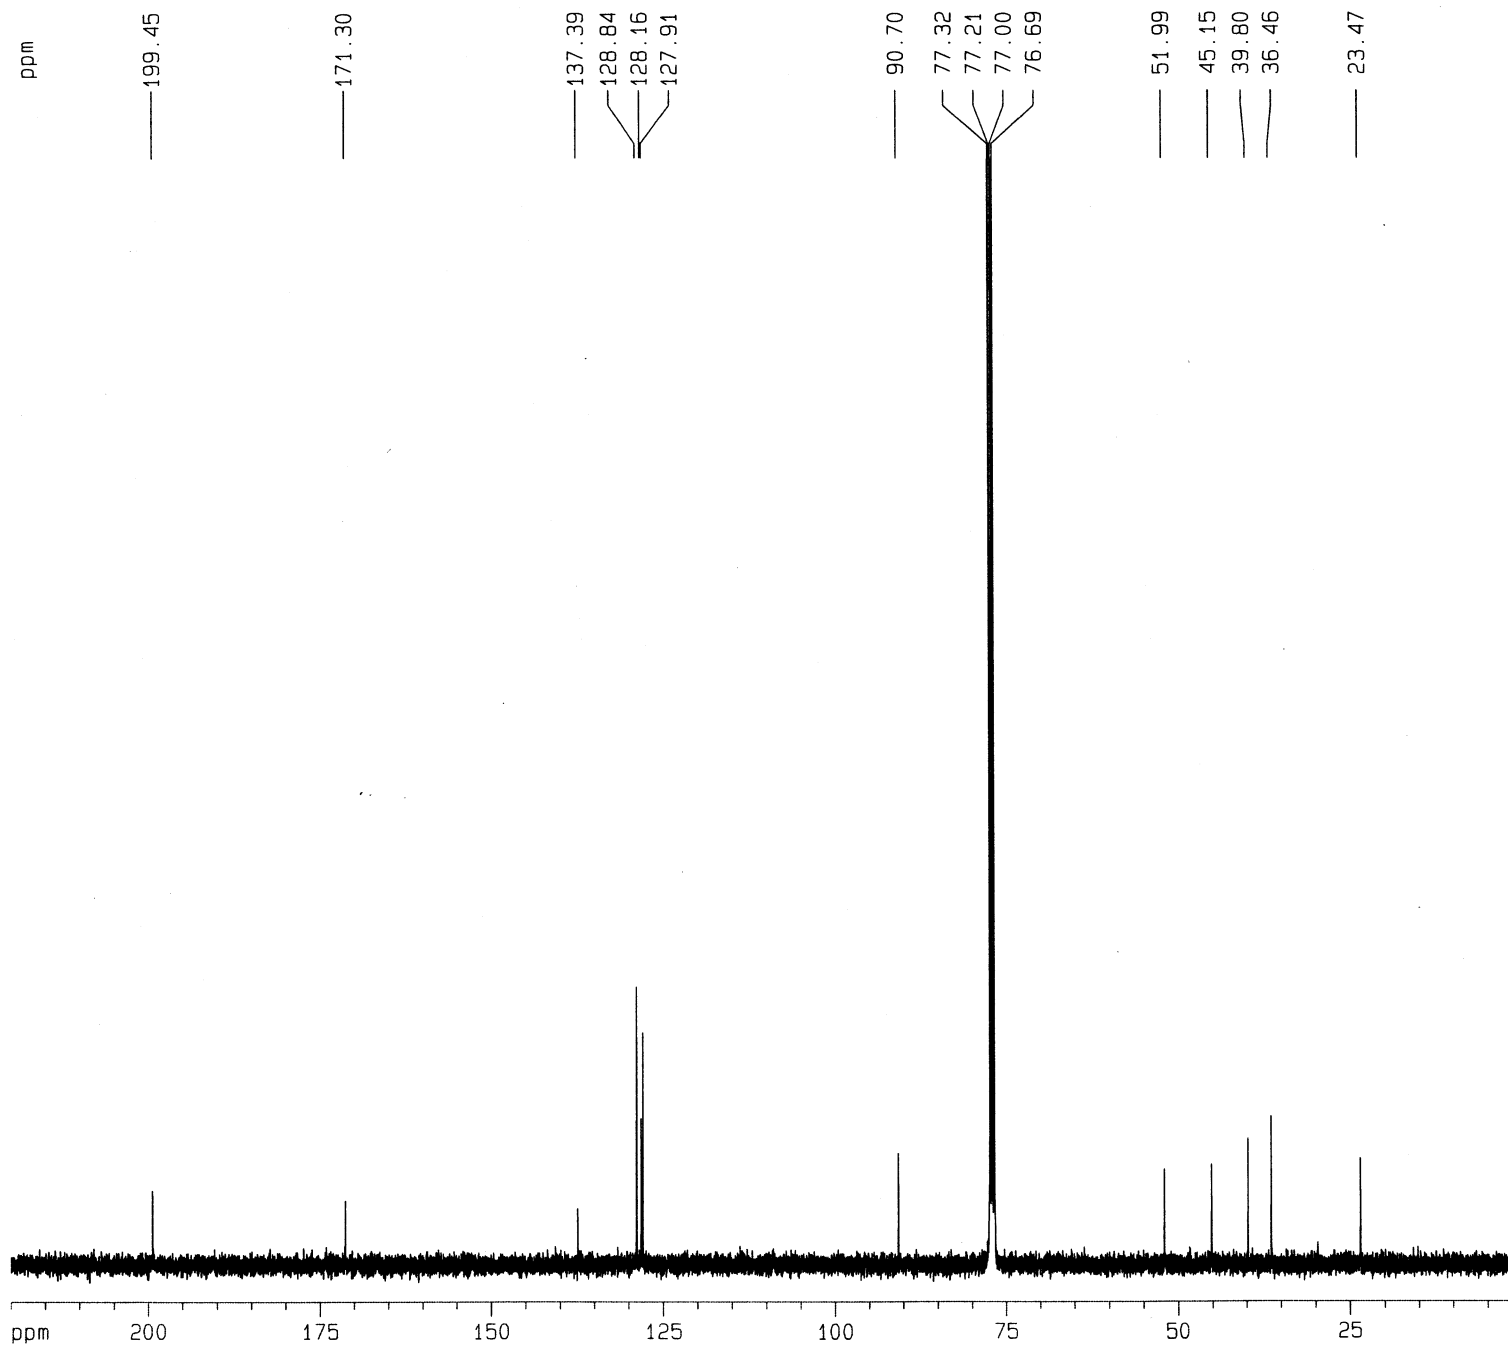

Current Data Parameters  
 NAME LCH-2-308-f2  
 EXPNO 4  
 PROCNO 1

F2 - Acquisition Parameters  
 Date\_ 20141208  
 Time 3.03  
 INSTRUM spect  
 PROBHD 5 mm QNP 1H  
 PULPROG zgpg30  
 TD 65536  
 SOLVENT CDC13  
 NS 4096  
 DS 4  
 SWH 25125.629 Hz  
 FIDRES 0.383387 Hz  
 AQ 1.3042164 sec  
 RG 256  
 DW 19.900 usec  
 DE 6.50 usec  
 TE 300.0 K  
 D1 2.00000000 sec  
 d11 0.03000000 sec  
 d12 0.00002000 sec

===== CHANNEL f1 =====  
 NUC1 13C  
 P1 10.20 usec  
 PL1 0.00 dB  
 SF01 100.6237959 MHz

===== CHANNEL f2 =====  
 CPDPRG2 waltz16  
 NUC2 1H  
 PCPD2 90.00 usec  
 PL2 -3.00 dB  
 PL12 14.50 dB  
 PL13 17.50 dB  
 SF02 400.1326008 MHz

F2 - Processing parameters  
 SI 32768  
 SF 100.6127700 MHz  
 WDW EM  
 SSB 0  
 LB 0.30 Hz  
 GB 0  
 PC 1.40

1D NMR plot parameters  
 CX 20.00 cm  
 F1P 220.000 ppm  
 F1 22134.81 Hz  
 F2P 0.000 ppm  
 F2 0.00 Hz  
 PPMCM 11.00000 ppm/cm  
 HZCM 1106.74048 Hz/cm

Fig S75. DEPT of compound anti-3a

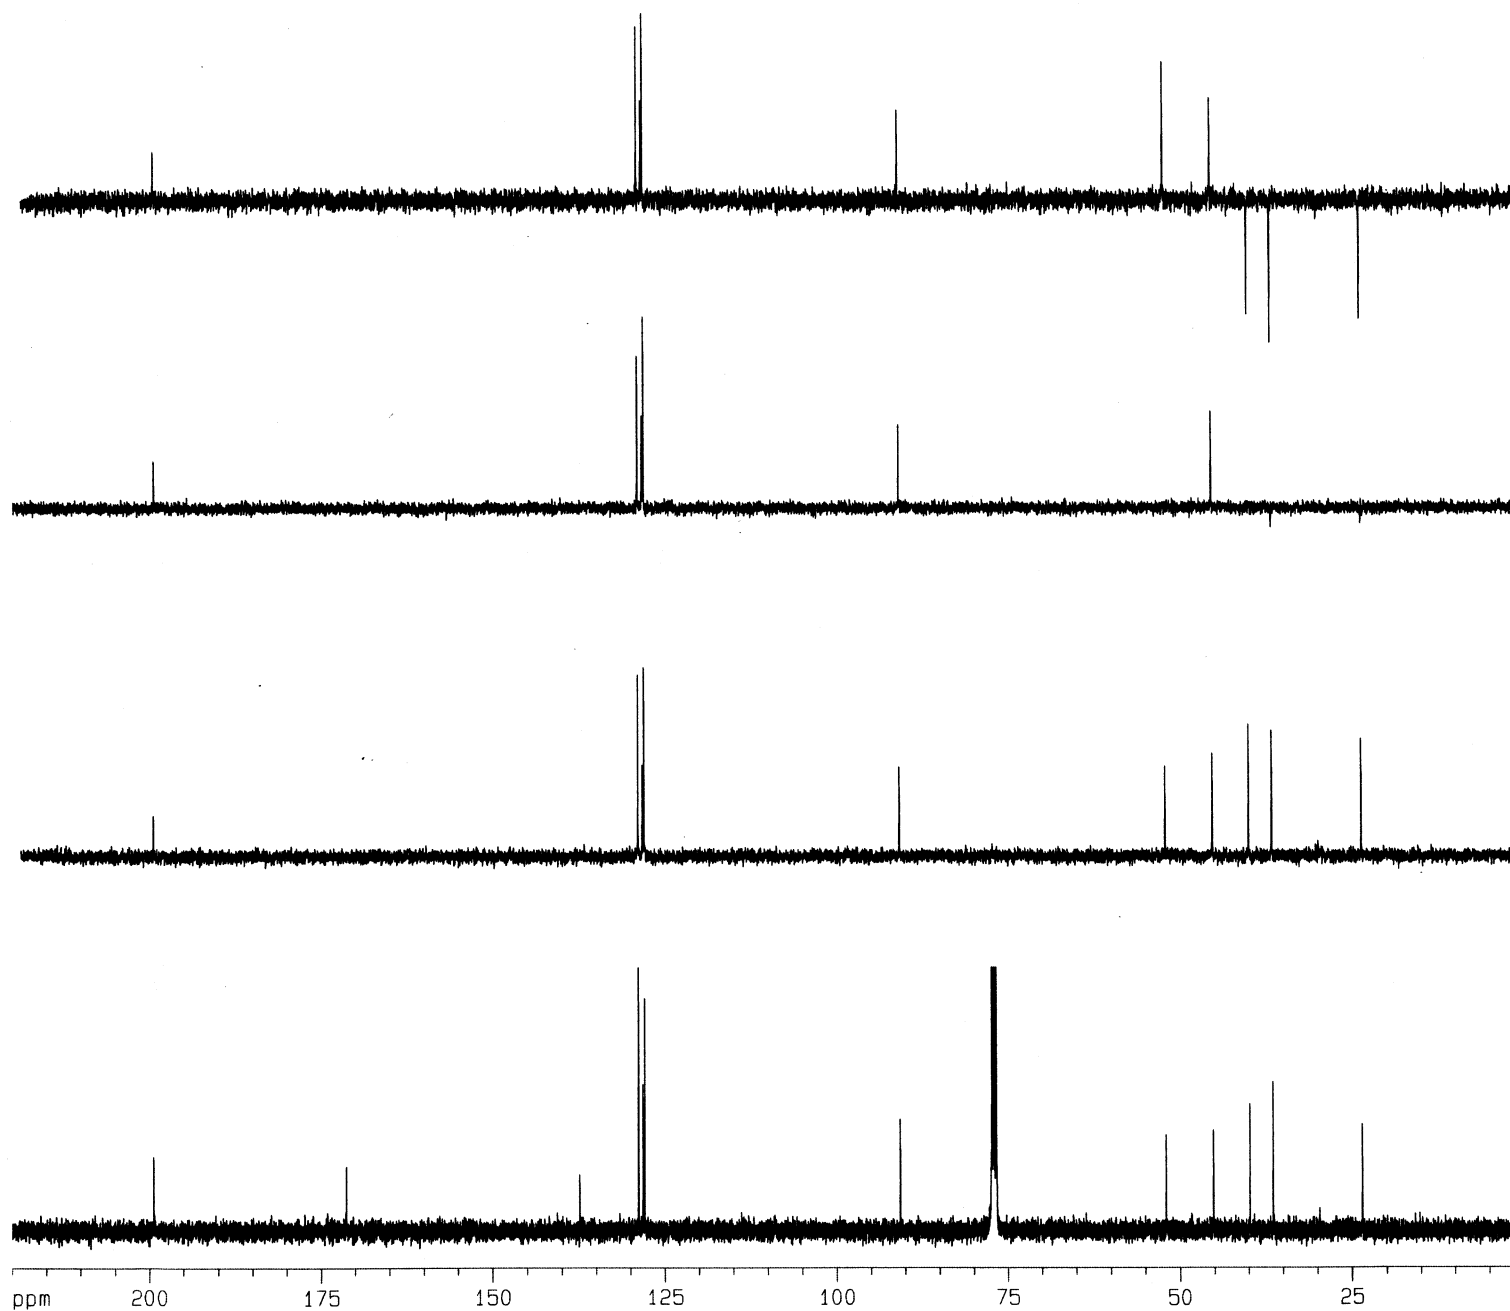

## Current Data Parameters

NAME LCH-2-308-f2  
 EXPNO 4  
 PROCNO 1

## F2 - Acquisition Parameters

Date\_ 20141208  
 Time 3.03  
 INSTRUM spect  
 PROBHD 5 mm QNP 1H  
 PULPROG zgpg30  
 TD 65536  
 SOLVENT CDC13  
 NS 4096  
 DS 4  
 SWH 25125.629 Hz  
 FIDRES 0.383387 Hz  
 AQ 1.3042164 sec  
 RG 256  
 DW 19.900 usec  
 DE 6.50 usec  
 TE 300.0 K  
 D1 2.00000000 sec  
 d11 0.03000000 sec  
 d12 0.00002000 sec

## ===== CHANNEL f1 =====

NUC1 13C  
 P1 10.20 usec  
 PL1 0.00 dB  
 SF01 100.6237959 MHz

## ===== CHANNEL f2 =====

CPDPRG2 waltz16  
 NUC2 1H  
 PCPD2 90.00 usec  
 PL2 -3.00 dB  
 PL12 14.50 dB  
 PL13 17.50 dB  
 SF02 400.1326008 MHz

## F2 - Processing parameters

SI 32768  
 SF 100.6127700 MHz  
 WDW EM  
 SSB 0  
 LB 0.30 Hz  
 GB 0  
 PC 1.40

## 1D NMR plot parameters

CX 20.00 cm  
 F1P 220.000 ppm  
 F1 22134.81 Hz  
 F2P 0.000 ppm  
 F2 0.00 Hz  
 PPMCM 11.00000 ppm/cm  
 HZCM 1106.74048 Hz/cm

Fig S76. <sup>1</sup>H NMR (CDCl<sub>3</sub>, 400 MHz) of compound syn-3b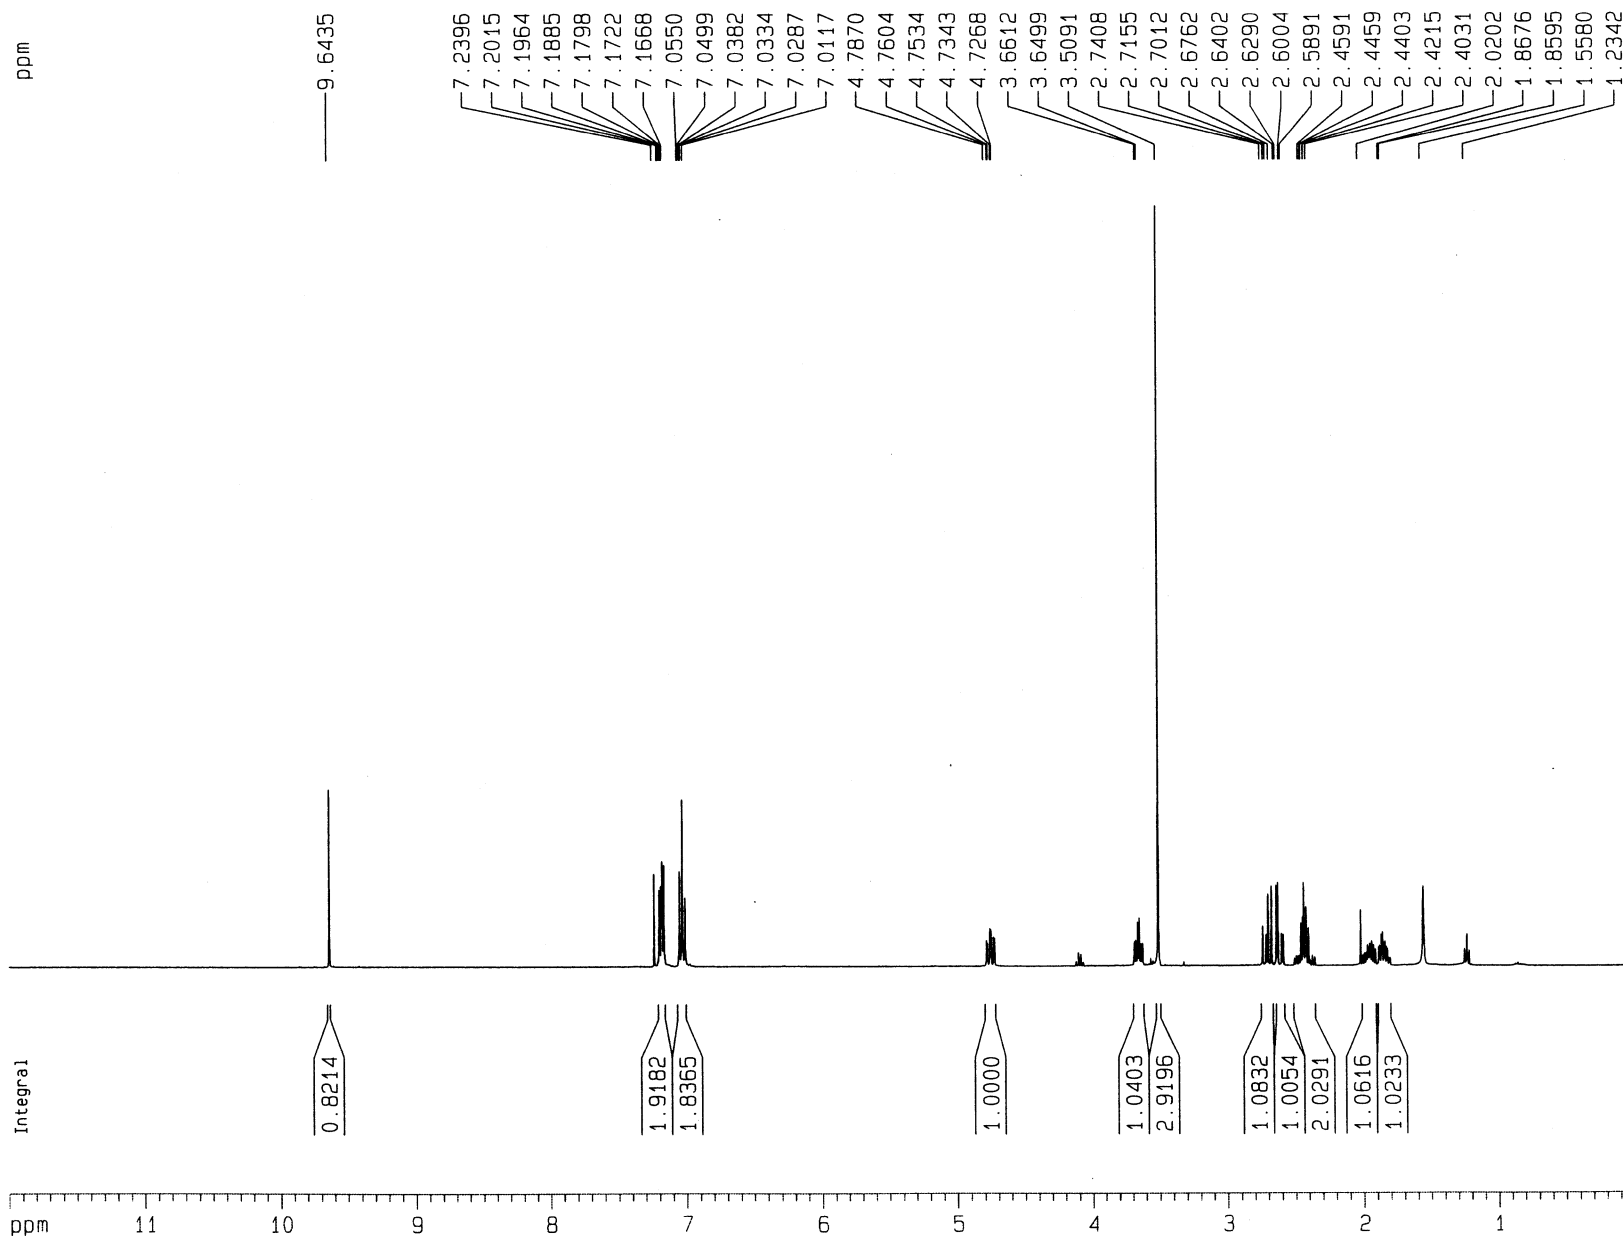

Current Data Parameters  
 NAME LCH-2-375-p1  
 EXPNO 7  
 PROCNO 1

F2 - Acquisition Parameters  
 Date\_ 20150306  
 Time 1.01  
 INSTRUM spect  
 PROBHD 5 mm QNP 1H  
 PULPROG zg30  
 TD 16384  
 SOLVENT CDCl3  
 NS 16  
 DS 0  
 SWH 5995.204 Hz  
 FIDRES 0.365918 Hz  
 AQ 1.3664756 sec  
 RG 4096  
 DW 83.400 usec  
 DE 6.50 usec  
 TE 300.0 K  
 D1 1.50000000 sec

===== CHANNEL f1 =====  
 NUC1 1H  
 P1 11.90 usec  
 PL1 -3.00 dB  
 SF01 400.1326008 MHz

F2 - Processing parameters  
 SI 8192  
 SF 400.1300179 MHz  
 WDW EM  
 SSB 0  
 LB 0.10 Hz  
 GB 0  
 PC 1.00

1D NMR plot parameters  
 CX 21.50 cm  
 F1P 12.000 ppm  
 F1 4801.56 Hz  
 F2P -0.000 ppm  
 F2 -0.00 Hz  
 PPMCM 0.55814 ppm/cm  
 HZCM 223.32838 Hz/cm



## C13 spectrum of

Fig S77. 13C NMR (CDCl3, 100 MHz) of compound syn-3b

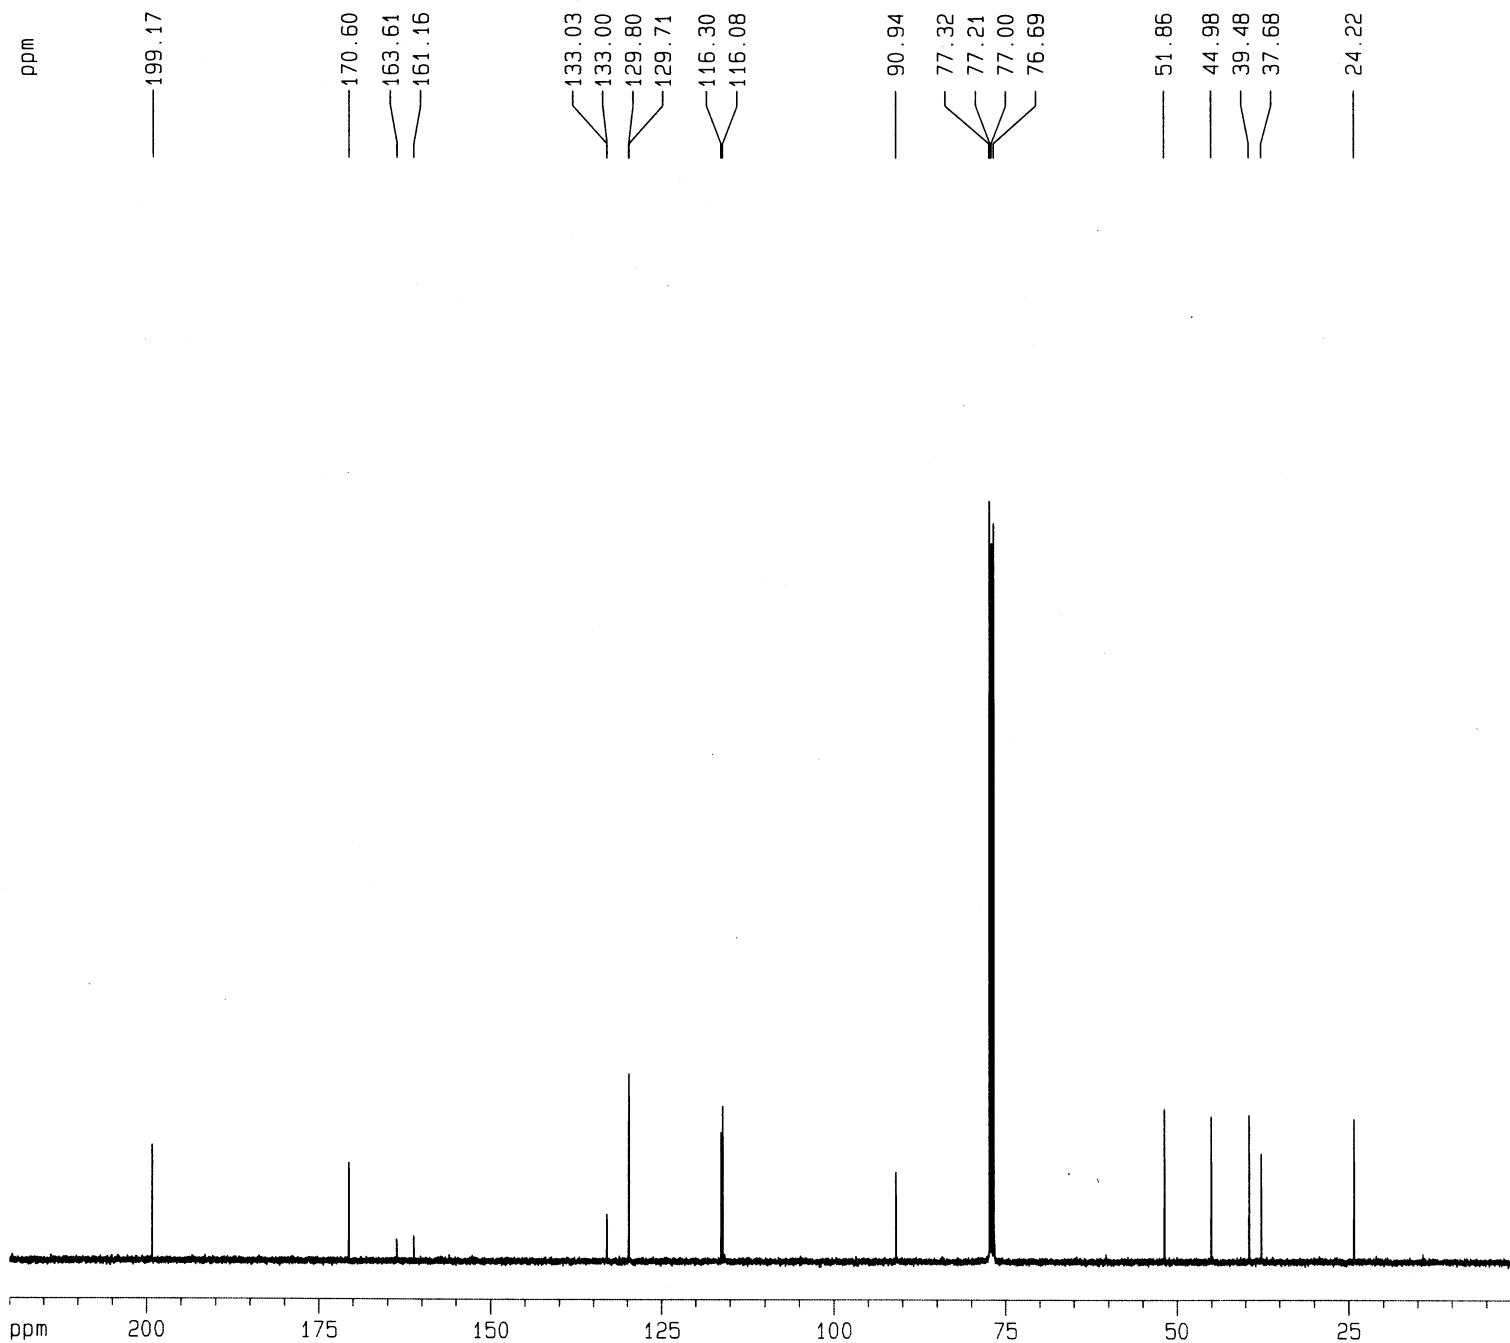

Current Data Parameters  
 NAME LCH-2-375-p1  
 EXPNO 8  
 PROCNO 1

F2 - Acquisition Parameters  
 Date\_ 20150306  
 Time 4.26  
 INSTRUM spect  
 PROBHD 5 mm QNP 1H  
 PULPROG zgpg30  
 TD 65536  
 SOLVENT CDCl3  
 NS 3686  
 DS 4  
 SWH 25125.629 Hz  
 FIDRES 0.383387 Hz  
 AQ 1.3042164 sec  
 RG 256  
 DW 19.900 usec  
 DE 6.50 usec  
 TE 300.0 K  
 D1 2.0000000 sec  
 d11 0.03000000 sec  
 d12 0.00002000 sec

===== CHANNEL f1 =====  
 NUC1 13C  
 P1 10.20 usec  
 PL1 0.00 dB  
 SF01 100.6237959 MHz

===== CHANNEL f2 =====  
 CPDPRG2 waltz16  
 NUC2 1H  
 PCPD2 90.00 usec  
 PL2 -3.00 dB  
 PL12 14.50 dB  
 PL13 17.50 dB  
 SF02 400.1326008 MHz

F2 - Processing parameters  
 SI 32768  
 SF 100.6127700 MHz  
 WDW EM  
 SSB 0  
 LB 0.30 Hz  
 GB 0  
 PC 1.40

1D NMR plot parameters  
 CX 20.00 cm  
 F1P 220.000 ppm  
 F1 22134.81 Hz  
 F2P 0.000 ppm  
 F2 0.00 Hz  
 PPMCM 11.00000 ppm/cm  
 HZCM 1106.74048 Hz/cm

Fig S78. DEPT of compound syn-3b

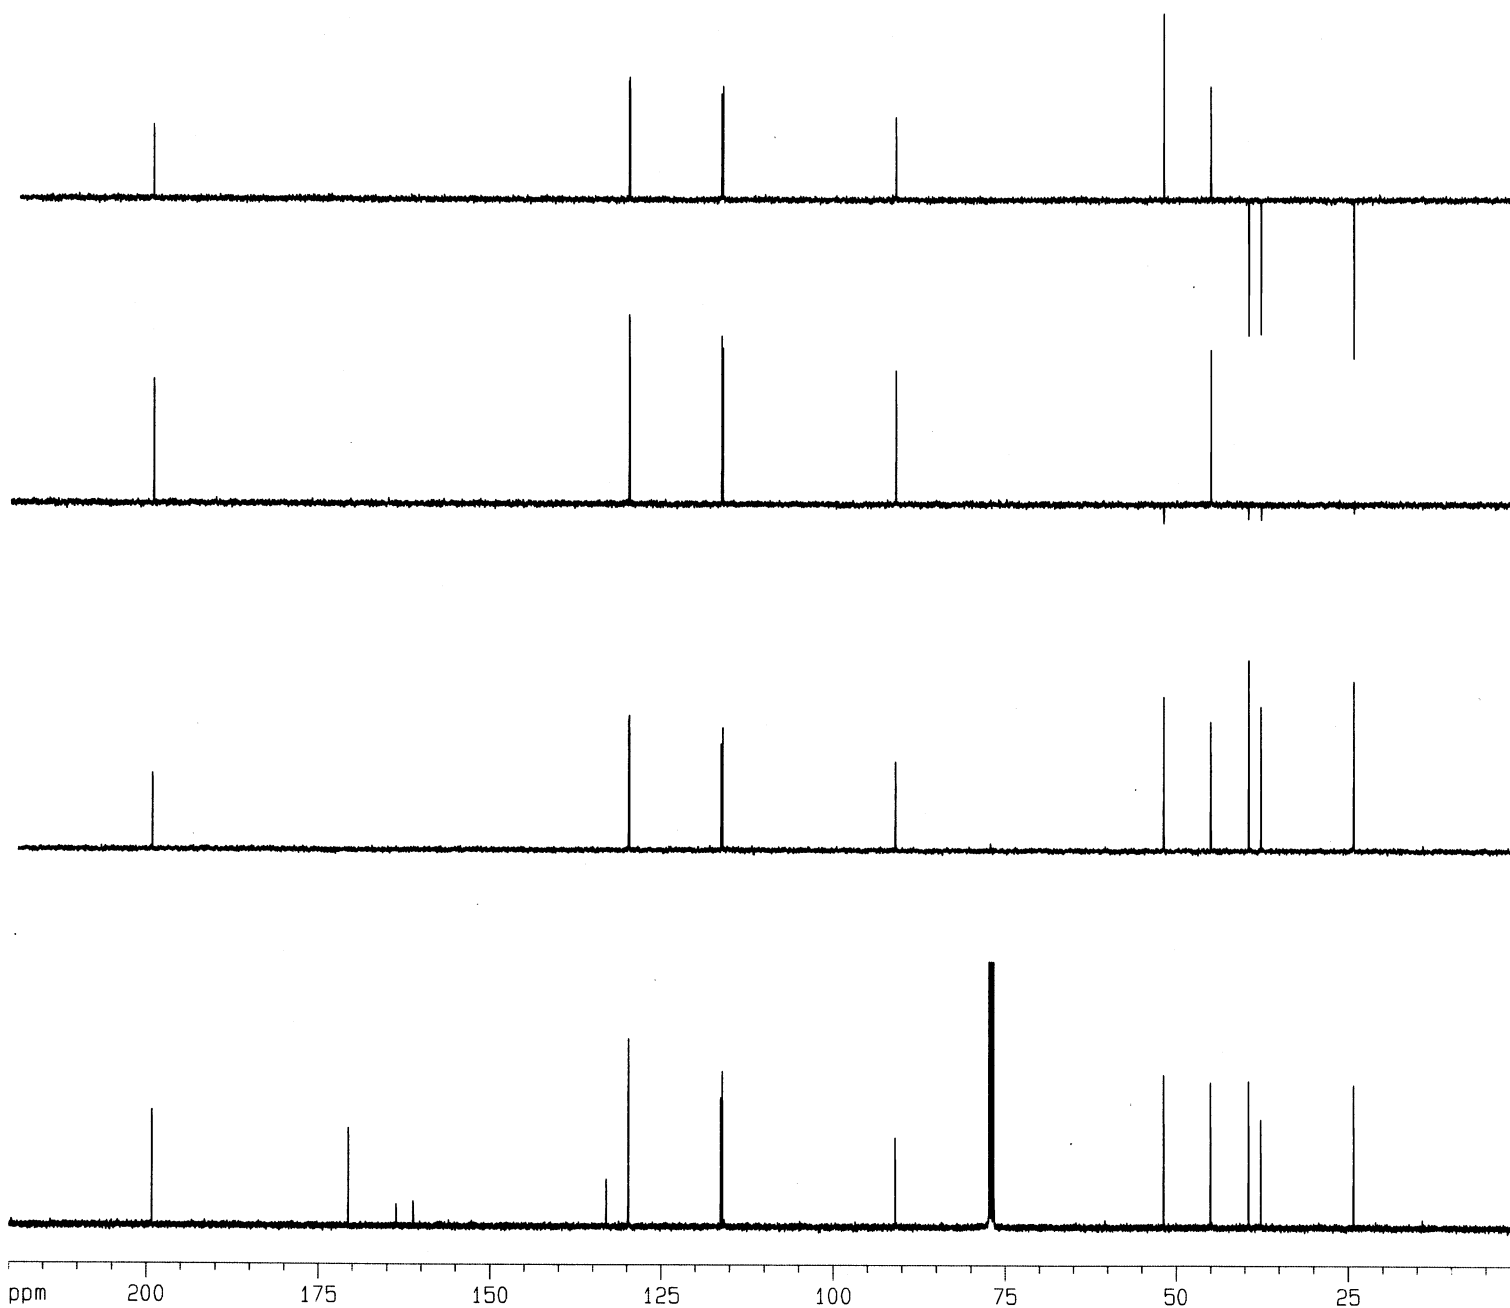

## Current Data Parameters

NAME LCH-2-375-p1  
EXPNO 8  
PROCNO 1

## F2 - Acquisition Parameters

Date\_ 20150306  
Time 4.26  
INSTRUM spect  
PROBHD 5 mm QNP 1H  
PULPROG zgpg30  
TD 65536  
SOLVENT CDC13  
NS 3686  
DS 4  
SWH 25125.629 Hz  
FIDRES 0.383387 Hz  
AQ 1.3042164 sec  
RG 256  
DW 19.900 usec  
DE 6.50 usec  
TE 300.0 K  
D1 2.0000000 sec  
d11 0.0300000 sec  
d12 0.0000200 sec

## ===== CHANNEL f1 =====

NUC1 13C  
P1 10.20 usec  
PL1 0.00 dB  
SF01 100.6237959 MHz

## ===== CHANNEL f2 =====

CPDPRG2 waltz16  
NUC2 1H  
PCPD2 90.00 usec  
PL2 -3.00 dB  
PL12 14.50 dB  
PL13 17.50 dB  
SF02 400.1326008 MHz

## F2 - Processing parameters

SI 32768  
SF 100.6127700 MHz  
WDW EM  
SSB 0  
LB 0.30 Hz  
GB 0  
PC 1.40

## 1D NMR plot parameters

CX 20.00 cm  
F1P 220.000 ppm  
F1 22134.81 Hz  
F2P 0.000 ppm  
F2 0.00 Hz  
PPMCM 11.00000 ppm/cm  
HZCM 1106.74048 Hz/cm

Fig S79. <sup>1</sup>H NMR (CDCl<sub>3</sub>, 400 MHz) of compound anti-3b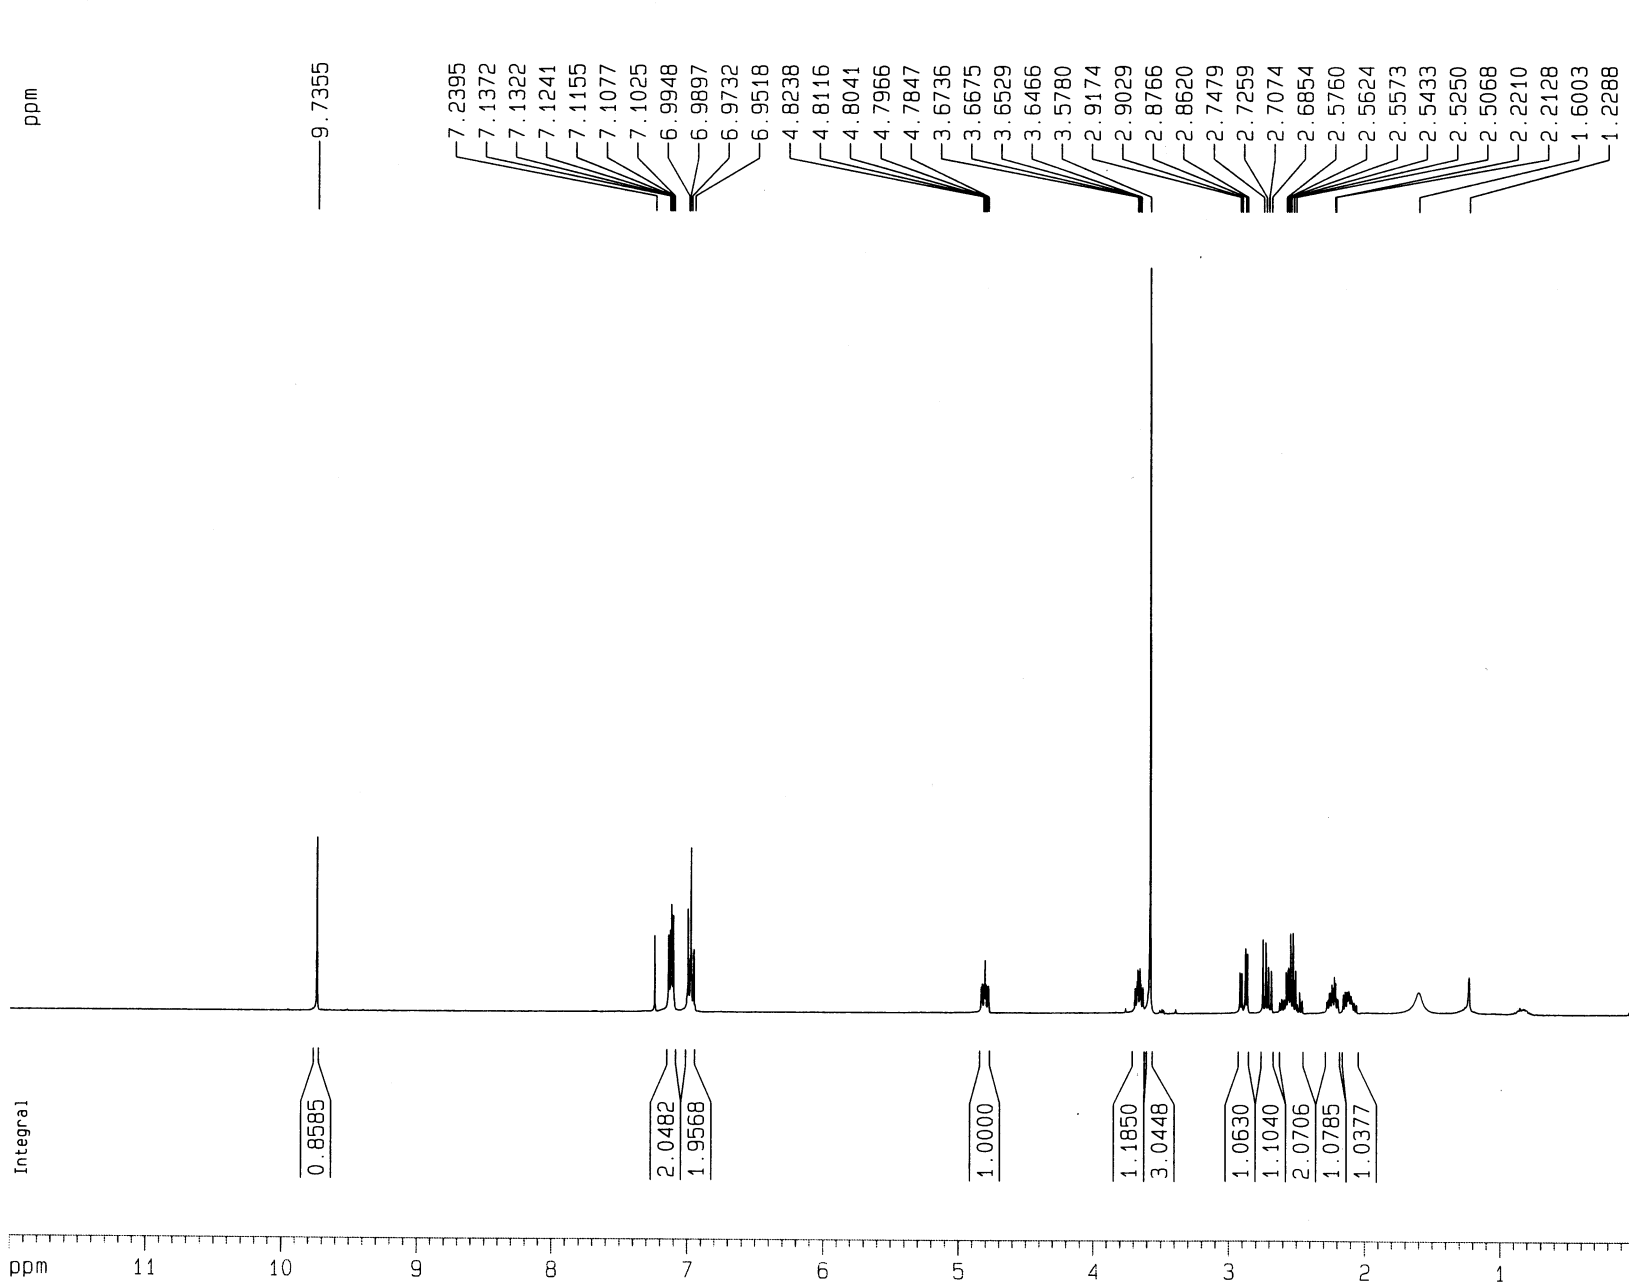

## Current Data Parameters

NAME LCH-2-375-p2  
EXPNO 8  
PROCNO 1

## F2 - Acquisition Parameters

Date\_ 20150318  
Time 21.05  
INSTRUM spect  
PROBHD 5 mm QNP 1H  
PULPROG zg30  
TD 16384  
SOLVENT CDCl3  
NS 16  
DS 0  
SWH 5995.204 Hz  
FIDRES 0.365918 Hz  
AQ 1.3664756 sec  
RG 2896.3  
DW 83.400 usec  
DE 6.50 usec  
TE 300.0 K  
D1 1.50000000 sec

## ===== CHANNEL f1 =====

NUC1 1H  
P1 11.90 usec  
PL1 -3.00 dB  
SF01 400.1326008 MHz

## F2 - Processing parameters

SI 8192  
SF 400.1300179 MHz  
WDW EM  
SSB 0  
LB 0.10 Hz  
GB 0  
PC 1.00

## 1D NMR plot parameters

CX 21.50 cm  
F1P 12.000 ppm  
F1 4801.56 Hz  
F2P -0.000 ppm  
F2 -0.00 Hz  
PPMCM 0.55814 ppm/cm  
HZCM 223.32838 Hz/cm

## C13 spectrum of

Fig S80. 13C NMR (CDCl3, 100 MHz) of compound anti-3b

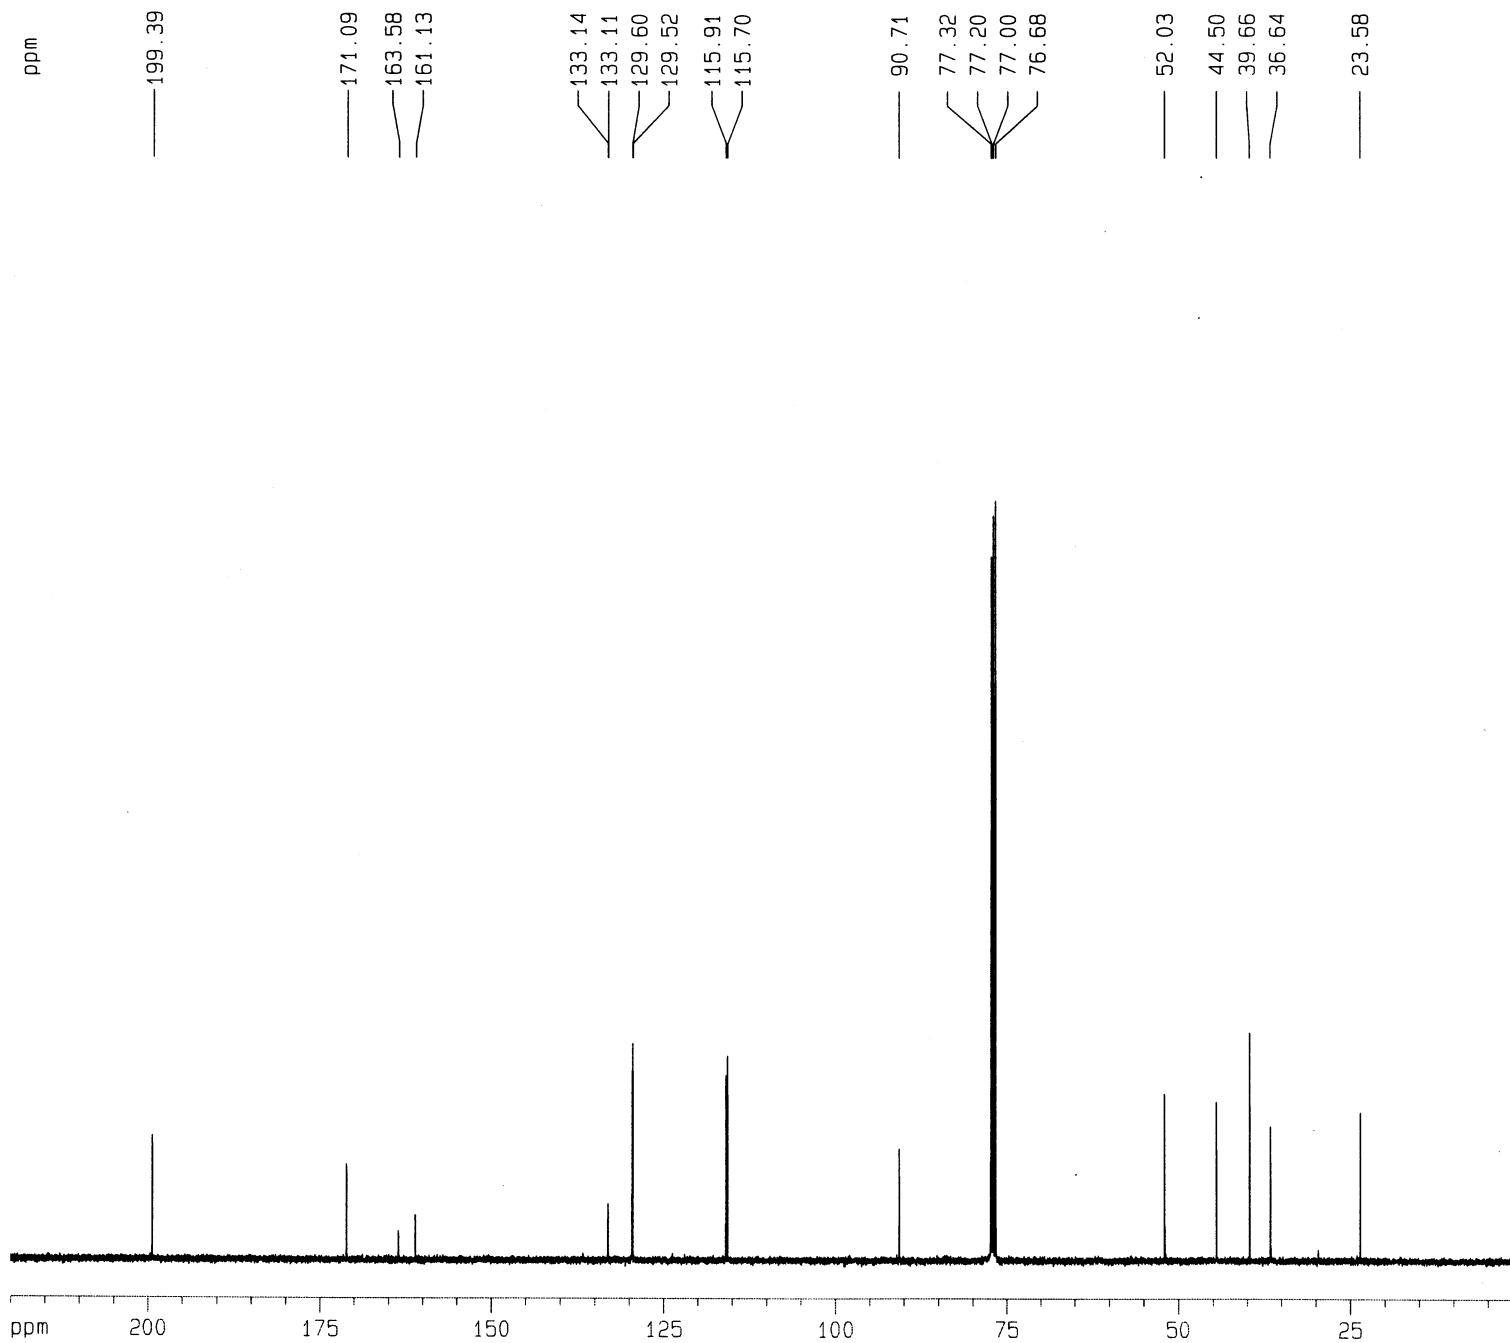

Current Data Parameters  
 NAME LCH-2-375-p2  
 EXPNO 10  
 PROCNO 1

F2 - Acquisition Parameters  
 Date\_ 20150319  
 Time 3.12  
 INSTRUM spect  
 PROBHD 5 mm QNP 1H  
 PULPROG zgpg30  
 TD 65536  
 SOLVENT CDC13  
 NS 3276  
 DS 4  
 SWH 25125.629 Hz  
 FIDRES 0.383387 Hz  
 AQ 1.3042164 sec  
 RG 256  
 DW 19.900 usec  
 DE 6.50 usec  
 TE 300.0 K  
 D1 2.00000000 sec  
 d11 0.03000000 sec  
 d12 0.00002000 sec

===== CHANNEL f1 =====  
 NUC1 13C  
 P1 10.20 usec  
 PL1 0.00 dB  
 SF01 100.6237959 MHz

===== CHANNEL f2 =====  
 CPDPRG2 waltz16  
 NUC2 1H  
 PCPD2 90.00 usec  
 PL2 -3.00 dB  
 PL12 14.50 dB  
 PL13 17.50 dB  
 SF02 400.1326008 MHz

F2 - Processing parameters  
 SI 32768  
 SF 100.6127723 MHz  
 WDW EM  
 SSB 0  
 LB 0.30 Hz  
 GB 0  
 PC 1.40

1D NMR plot parameters  
 CX 20.00 cm  
 F1P 220.000 ppm  
 F1 22134.81 Hz  
 F2P 0.000 ppm  
 F2 0.00 Hz  
 PPMCM 11.00000 ppm/cm  
 HZCM 1106.74048 Hz/cm

Fig S81. DEPT of compound anti-3b

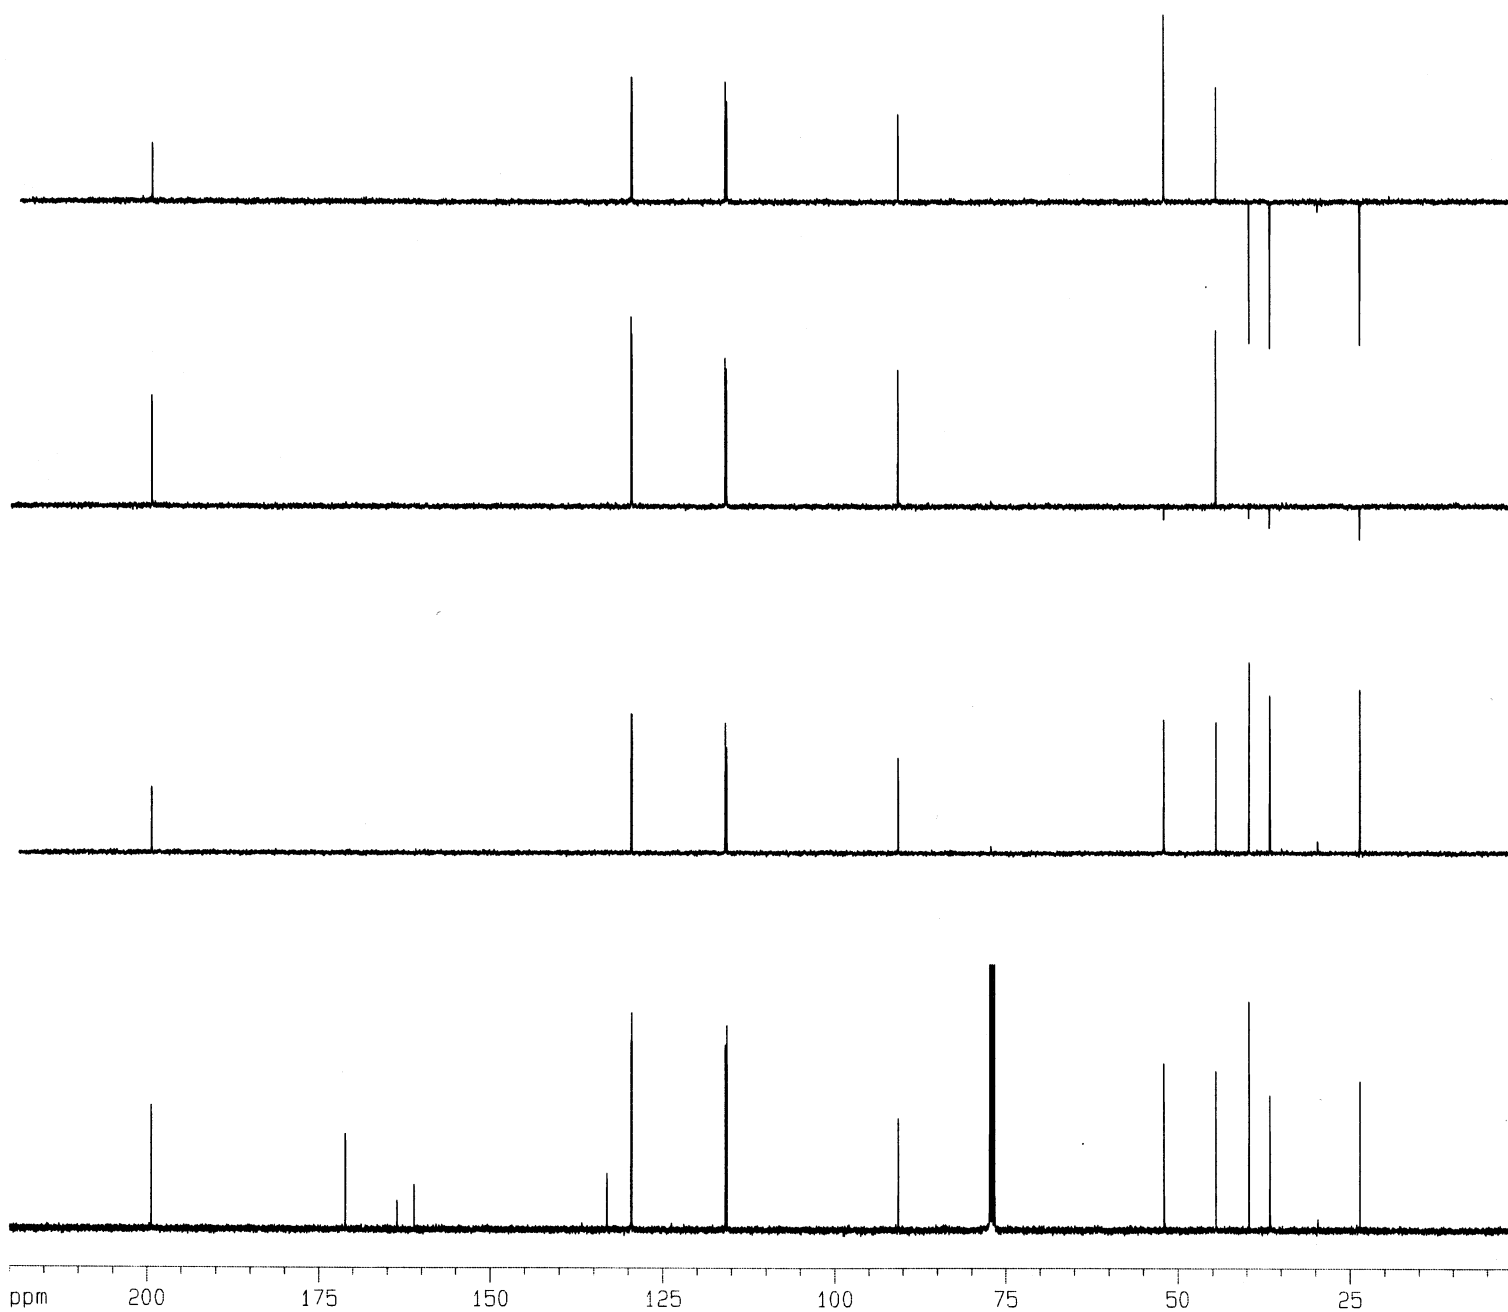

## Current Data Parameters

NAME LCH-2-375-p2  
 EXPNO 10  
 PROCNO 1

## F2 - Acquisition Parameters

Date\_ 20150319  
 Time 3.12  
 INSTRUM spect  
 PROBHD 5 mm QNP 1H  
 PULPROG zgpg30  
 TD 65536  
 SOLVENT CDC13  
 NS 3276  
 DS 4  
 SWH 25125.629 Hz  
 FIDRES 0.383387 Hz  
 AQ 1.3042164 sec  
 RG 256  
 DW 19.900 usec  
 DE 6.50 usec  
 TE 300.0 K  
 D1 2.0000000 sec  
 d11 0.0300000 sec  
 d12 0.0000200 sec

## ===== CHANNEL f1 =====

NUC1 13C  
 P1 10.20 usec  
 PL1 0.00 dB  
 SF01 100.6237959 MHz

## ===== CHANNEL f2 =====

CPDPRG2 waltz16  
 NUC2 1H  
 PCPD2 90.00 usec  
 PL2 -3.00 dB  
 PL12 14.50 dB  
 PL13 17.50 dB  
 SF02 400.1326008 MHz

## F2 - Processing parameters

SI 32768  
 SF 100.6127723 MHz  
 WDW EM  
 SSB 0  
 LB 0.30 Hz  
 GB 0  
 PC 1.40

## 1D NMR plot parameters

CX 20.00 cm  
 F1P 220.000 ppm  
 F1 22134.81 Hz  
 F2P 0.000 ppm  
 F2 0.00 Hz  
 PPMCM 11.00000 ppm/cm  
 HZCM 1106.74048 Hz/cm

Fig S82. <sup>1</sup>H NMR (CDCl<sub>3</sub>, 400 MHz) of compound syn-3c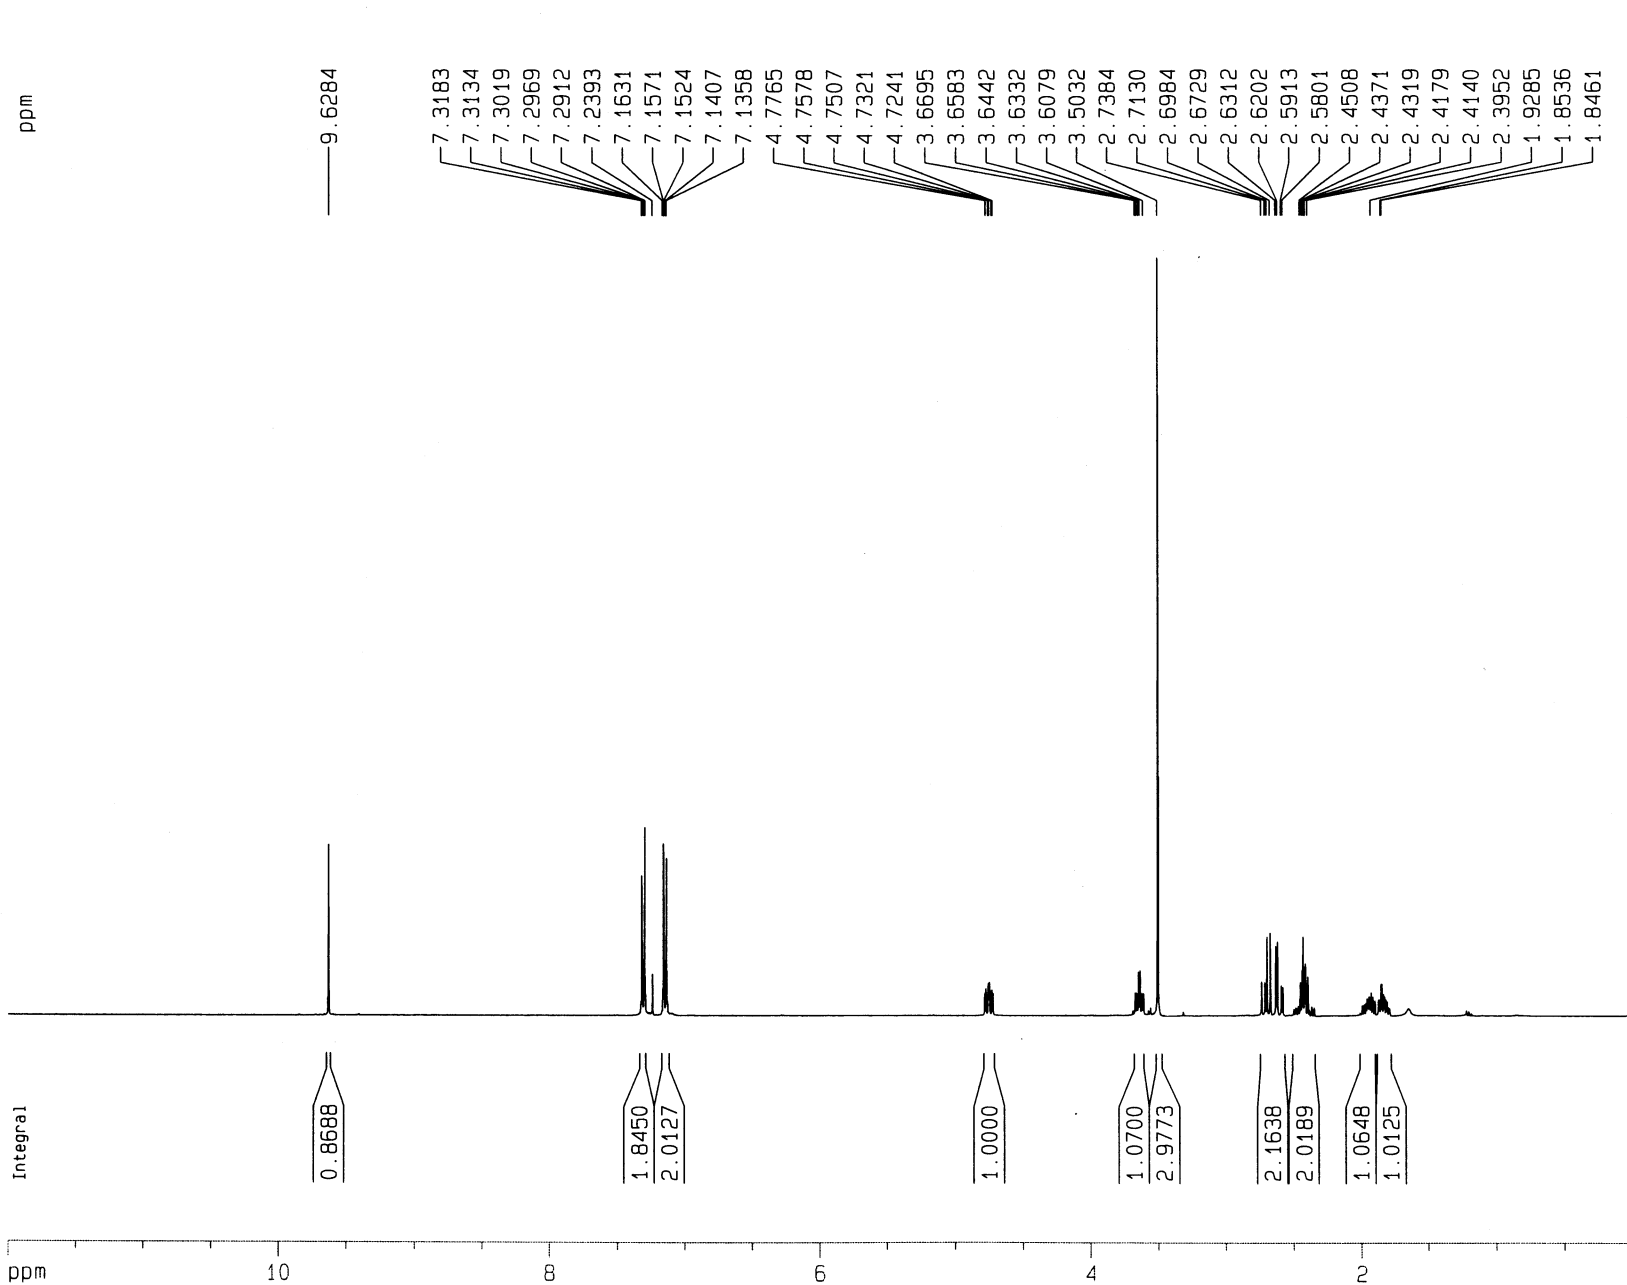

## Current Data Parameters

NAME LCH-2-381-p1  
EXPNO 1  
PROCNO 1

## F2 - Acquisition Parameters

Date\_ 20150320  
Time 0.23  
INSTRUM spect  
PROBHD 5 mm QNP 1H  
PULPROG zg30  
TD 16384  
SOLVENT CDCl<sub>3</sub>  
NS 16  
DS 0  
SWH 5995.204 Hz  
FIDRES 0.365918 Hz  
AQ 1.3664756 sec  
RG 1290.2  
DW 83.400 usec  
DE 6.50 usec  
TE 300.0 K  
D1 1.5000000 sec

## ===== CHANNEL f1 =====

NUC1 1H  
P1 11.90 usec  
PL1 -3.00 dB  
SF01 400.1326008 MHz

## F2 - Processing parameters

SI 8192  
SF 400.1300179 MHz  
WDW EM  
SSB 0  
LB 0.10 Hz  
GB 0  
PC 1.00

## 1D NMR plot parameters

CX 21.50 cm  
F1P 12.000 ppm  
F1 4801.56 Hz  
F2P -0.000 ppm  
F2 -0.00 Hz  
PPMCM 0.55814 ppm/cm  
HZCM 223.32838 Hz/cm

## C13 spectrum of

Fig S83. 13C NMR (CDCl3, 100 MHz) of compound syn-3c

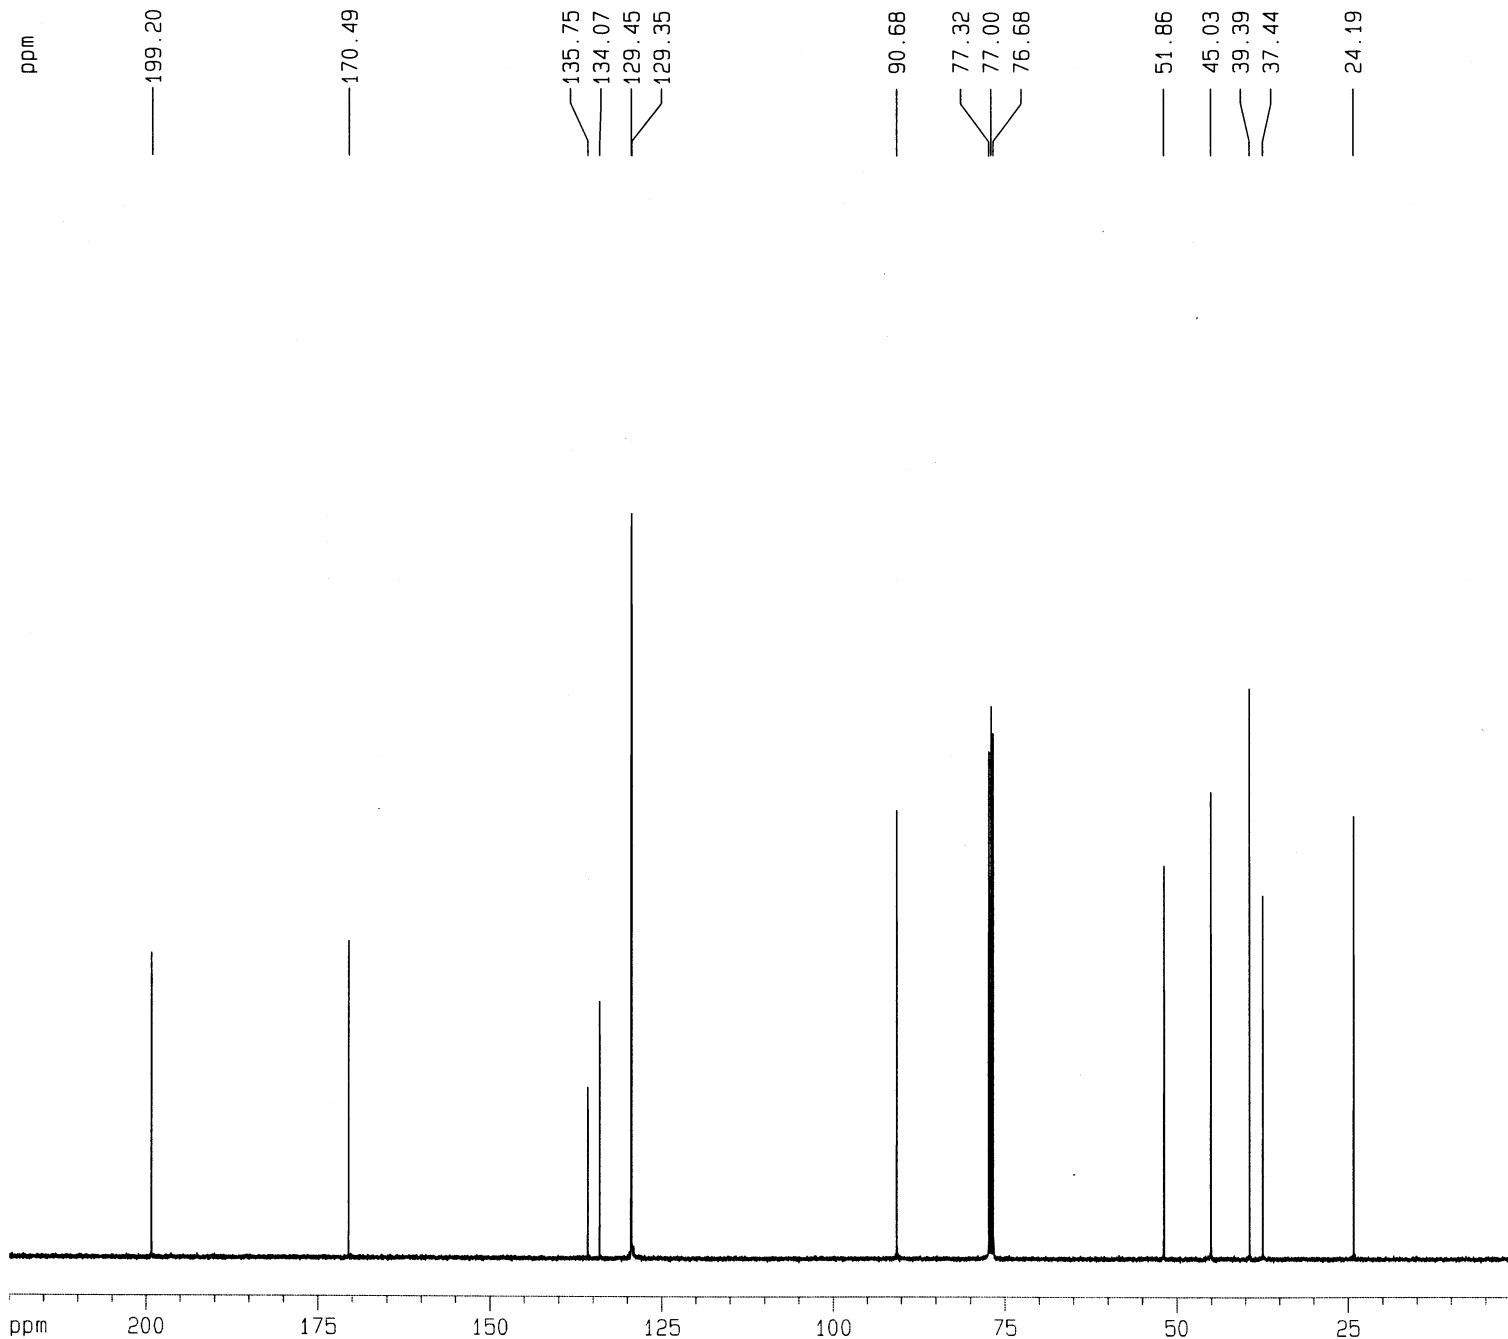

Current Data Parameters  
 NAME LCH-2-381-p1  
 EXPNO 2  
 PROCNO 1

F2 - Acquisition Parameters  
 Date\_ 20150320  
 Time 3.36  
 INSTRUM spect  
 PROBHD 5 mm QNP 1H  
 PULPROG zgpg30  
 TD 65536  
 SOLVENT CDC13  
 NS 3481  
 DS 4  
 SWH 25125.629 Hz  
 FIDRES 0.383387 Hz  
 AQ 1.3042164 sec  
 RG 256  
 DW 19.900 usec  
 DE 6.50 usec  
 TE 300.0 K  
 D1 2.00000000 sec  
 d11 0.03000000 sec  
 d12 0.00002000 sec

===== CHANNEL f1 =====  
 NUC1 13C  
 P1 10.20 usec  
 PL1 0.00 dB  
 SF01 100.6237959 MHz

===== CHANNEL f2 =====  
 CPDPRG2 waltz16  
 NUC2 1H  
 PCPD2 90.00 usec  
 PL2 -3.00 dB  
 PL12 14.50 dB  
 PL13 17.50 dB  
 SF02 400.1326008 MHz

F2 - Processing parameters  
 SI 32768  
 SF 100.6127754 MHz  
 WDW EM  
 SSB 0  
 LB 0.30 Hz  
 GB 0  
 PC 1.40

1D NMR plot parameters  
 CX 20.00 cm  
 F1P 220.000 ppm  
 F1 22134.81 Hz  
 F2P 0.000 ppm  
 F2 0.00 Hz  
 PPMCM 11.00000 ppm/cm  
 HZCM 1106.74060 Hz/cm

Fig S84. DEPT of compound syn-3c

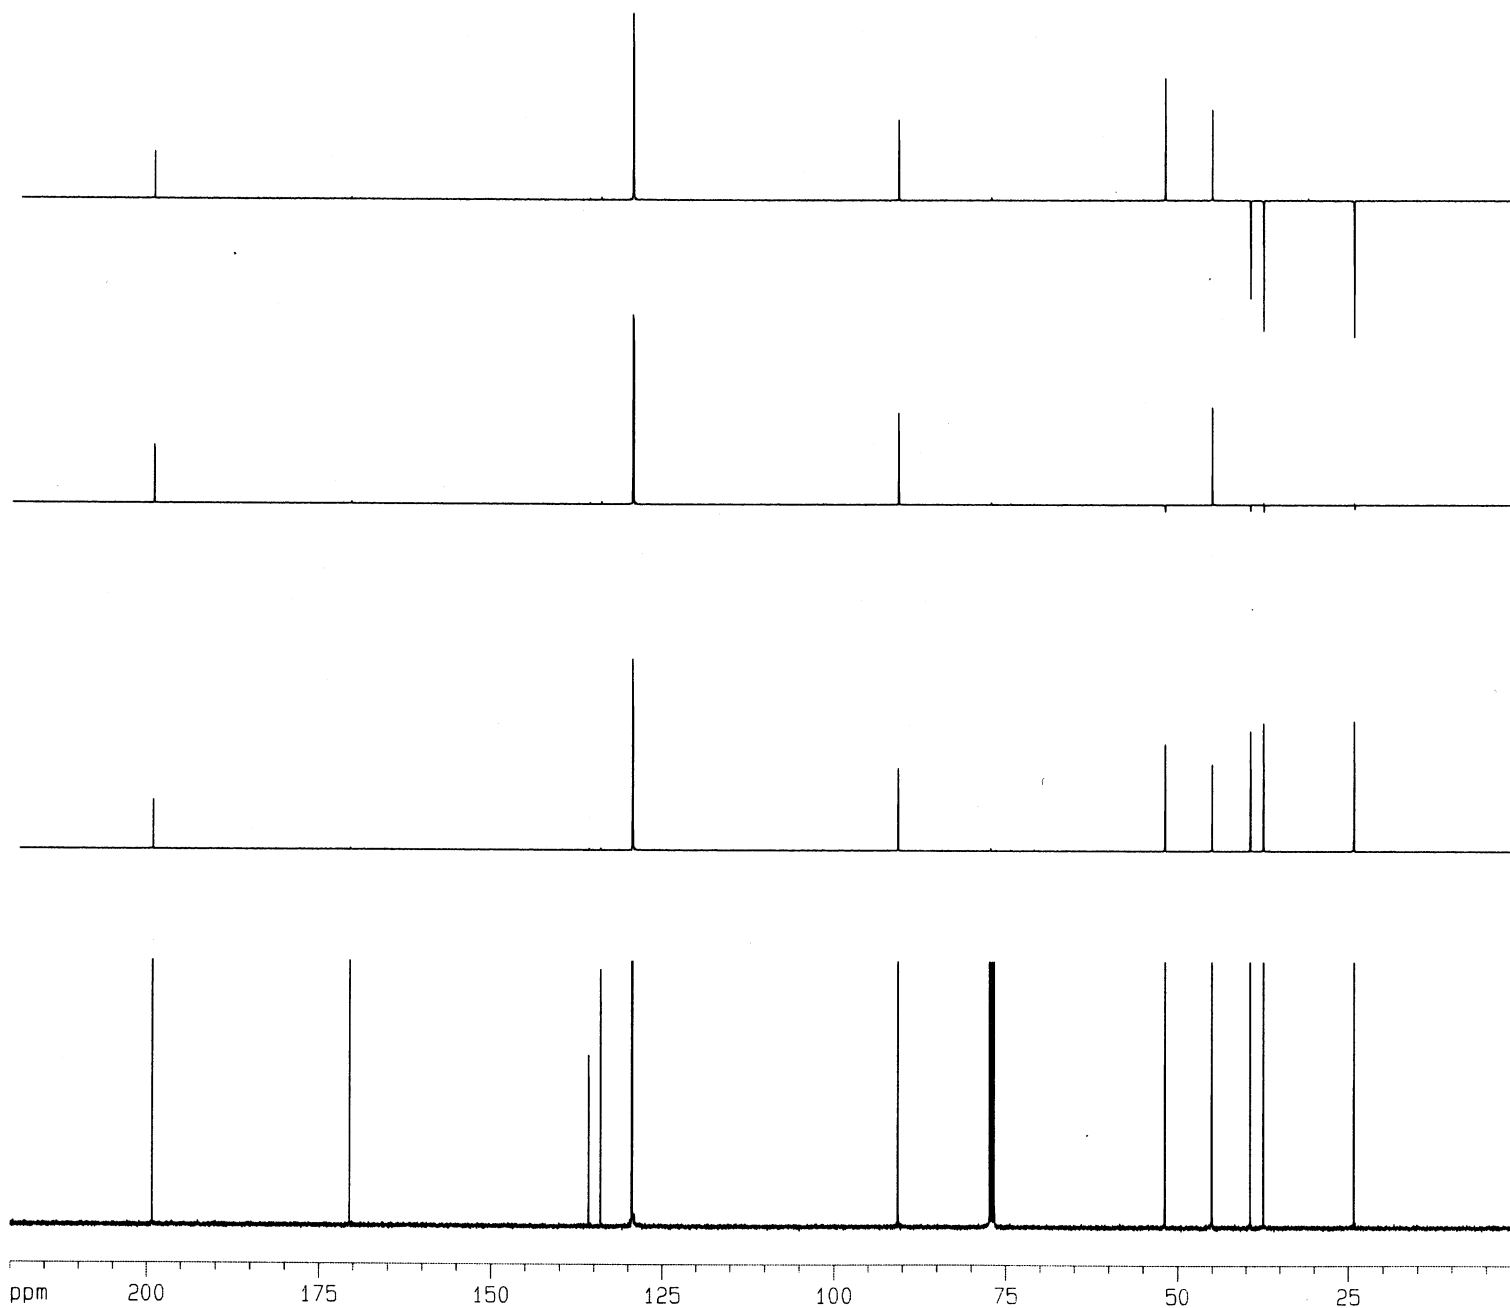

## Current Data Parameters

NAME LCH-2-381-p1  
EXPNO 2  
PROCNO 1

## F2 - Acquisition Parameters

Date\_ 20150320  
Time 3.36  
INSTRUM spect  
PROBHD 5 mm GNP 1H  
PULPROG zgpg30  
TD 65536  
SOLVENT CDC13  
NS 3481  
DS 4  
SWH 25125.629 Hz  
FIDRES 0.383387 Hz  
AQ 1.3042164 sec  
RG 256  
DW 19.900 usec  
DE 6.50 usec  
TE 300.0 K  
D1 2.00000000 sec  
d11 0.03000000 sec  
d12 0.00002000 sec

## ===== CHANNEL f1 =====

NUC1 13C  
P1 10.20 usec  
PL1 0.00 dB  
SF01 100.6237959 MHz

## ===== CHANNEL f2 =====

CPDPRG2 waltz16  
NUC2 1H  
PCPD2 90.00 usec  
PL2 -3.00 dB  
PL12 14.50 dB  
PL13 17.50 dB  
SF02 400.1326008 MHz

## F2 - Processing parameters

SI 32768  
SF 100.6127754 MHz  
WDW EM  
SSB 0  
LB 0.30 Hz  
GB 0  
PC 1.40

## 1D NMR plot parameters

CX 20.00 cm  
F1P 220.000 ppm  
F1 22134.81 Hz  
F2P 0.000 ppm  
F2 0.00 Hz  
PPMCM 11.00000 ppm/cm  
HZCM 1106.74048 Hz/cm



Fig S85. <sup>1</sup>H NMR (CDCl<sub>3</sub>, 400 MHz) of compound anti-3c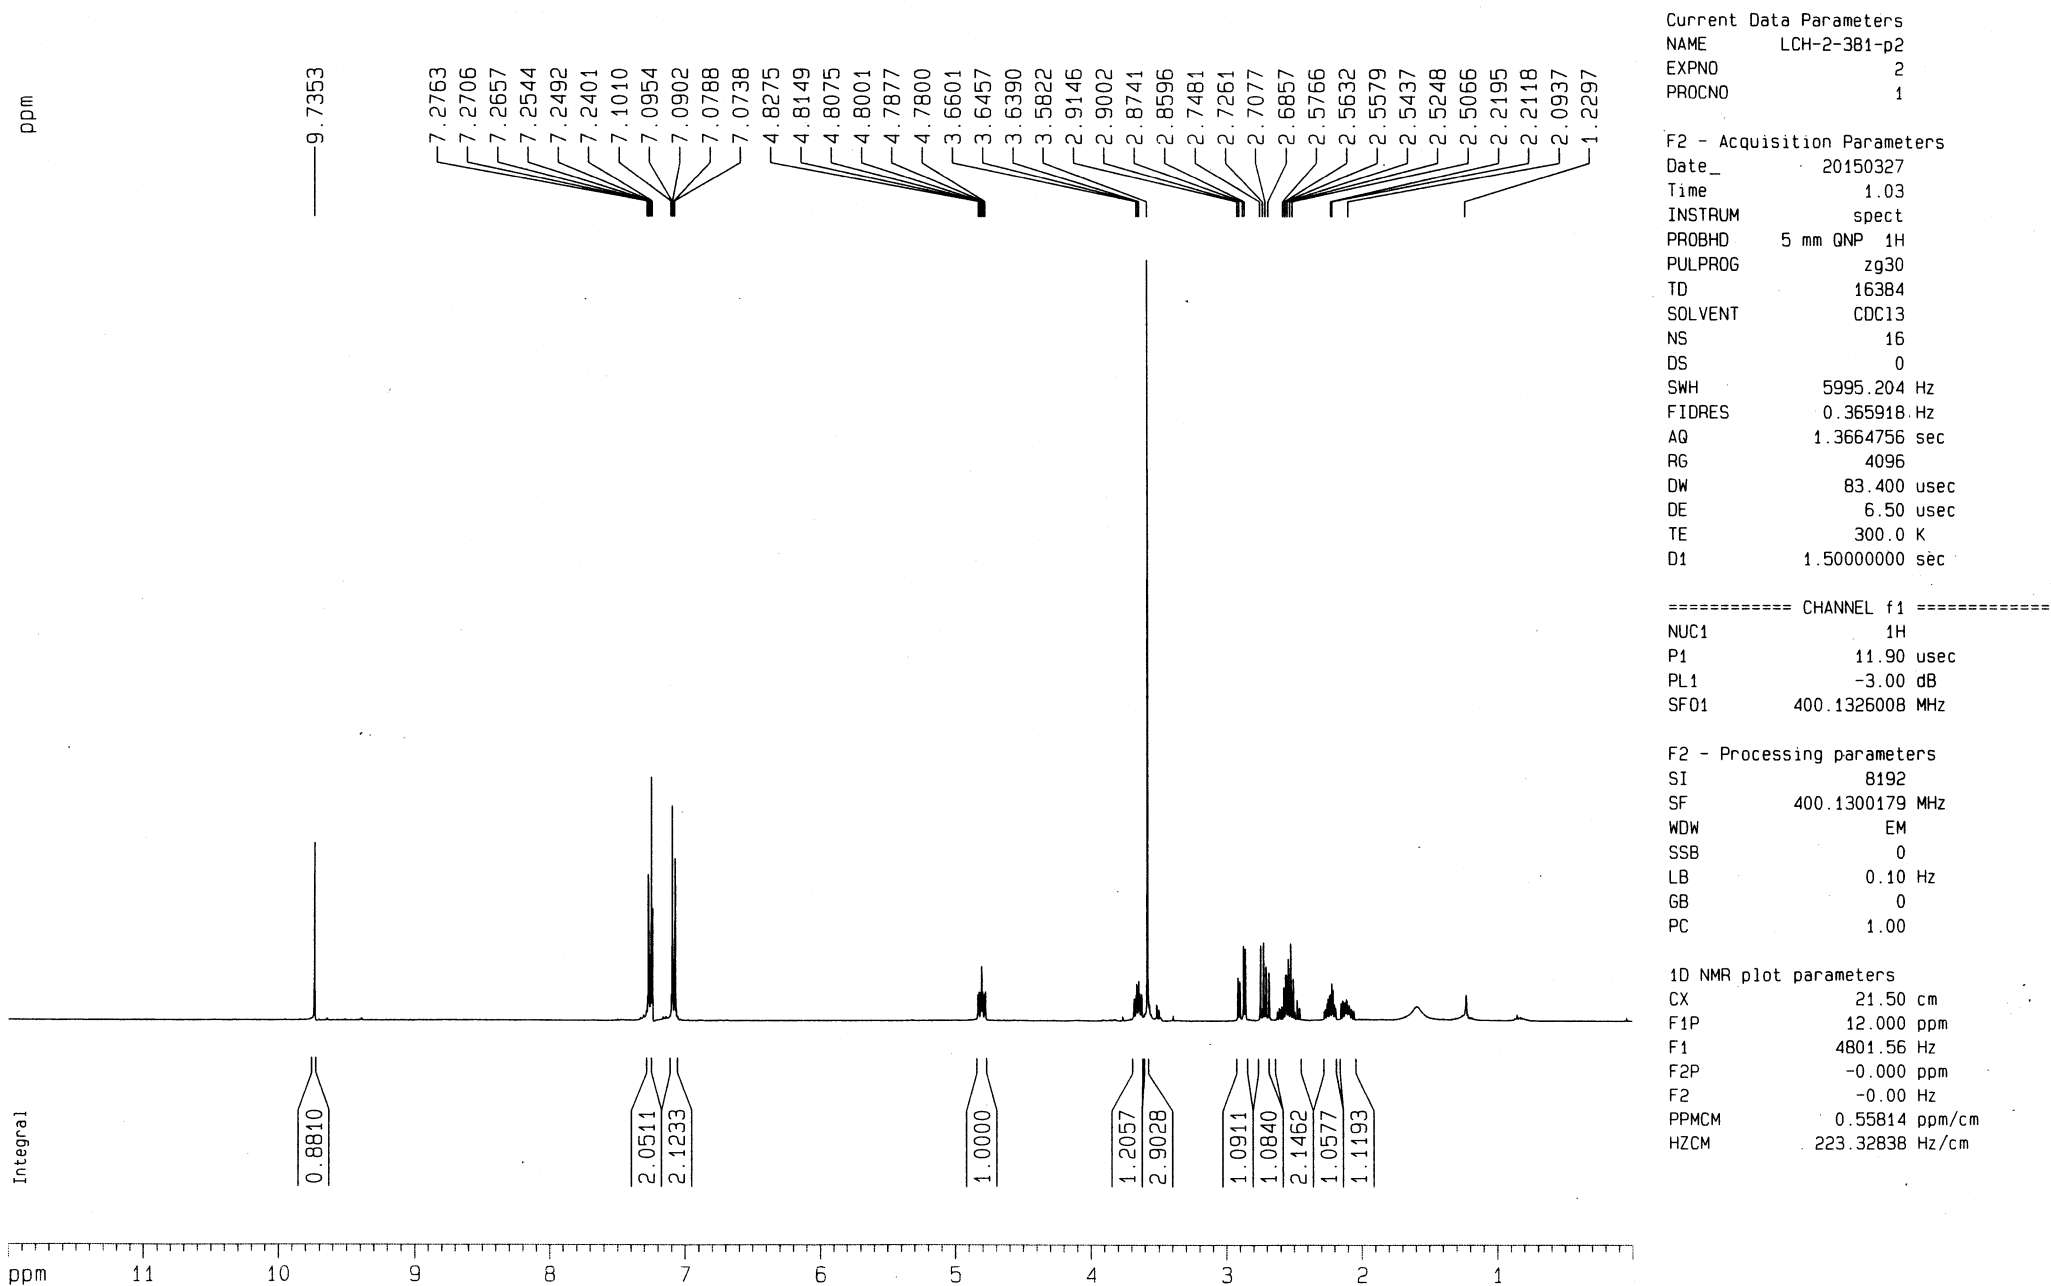

## C13 spectrum of

Fig S86. 13C NMR (CDCl3, 100 MHz) of compound anti-3c

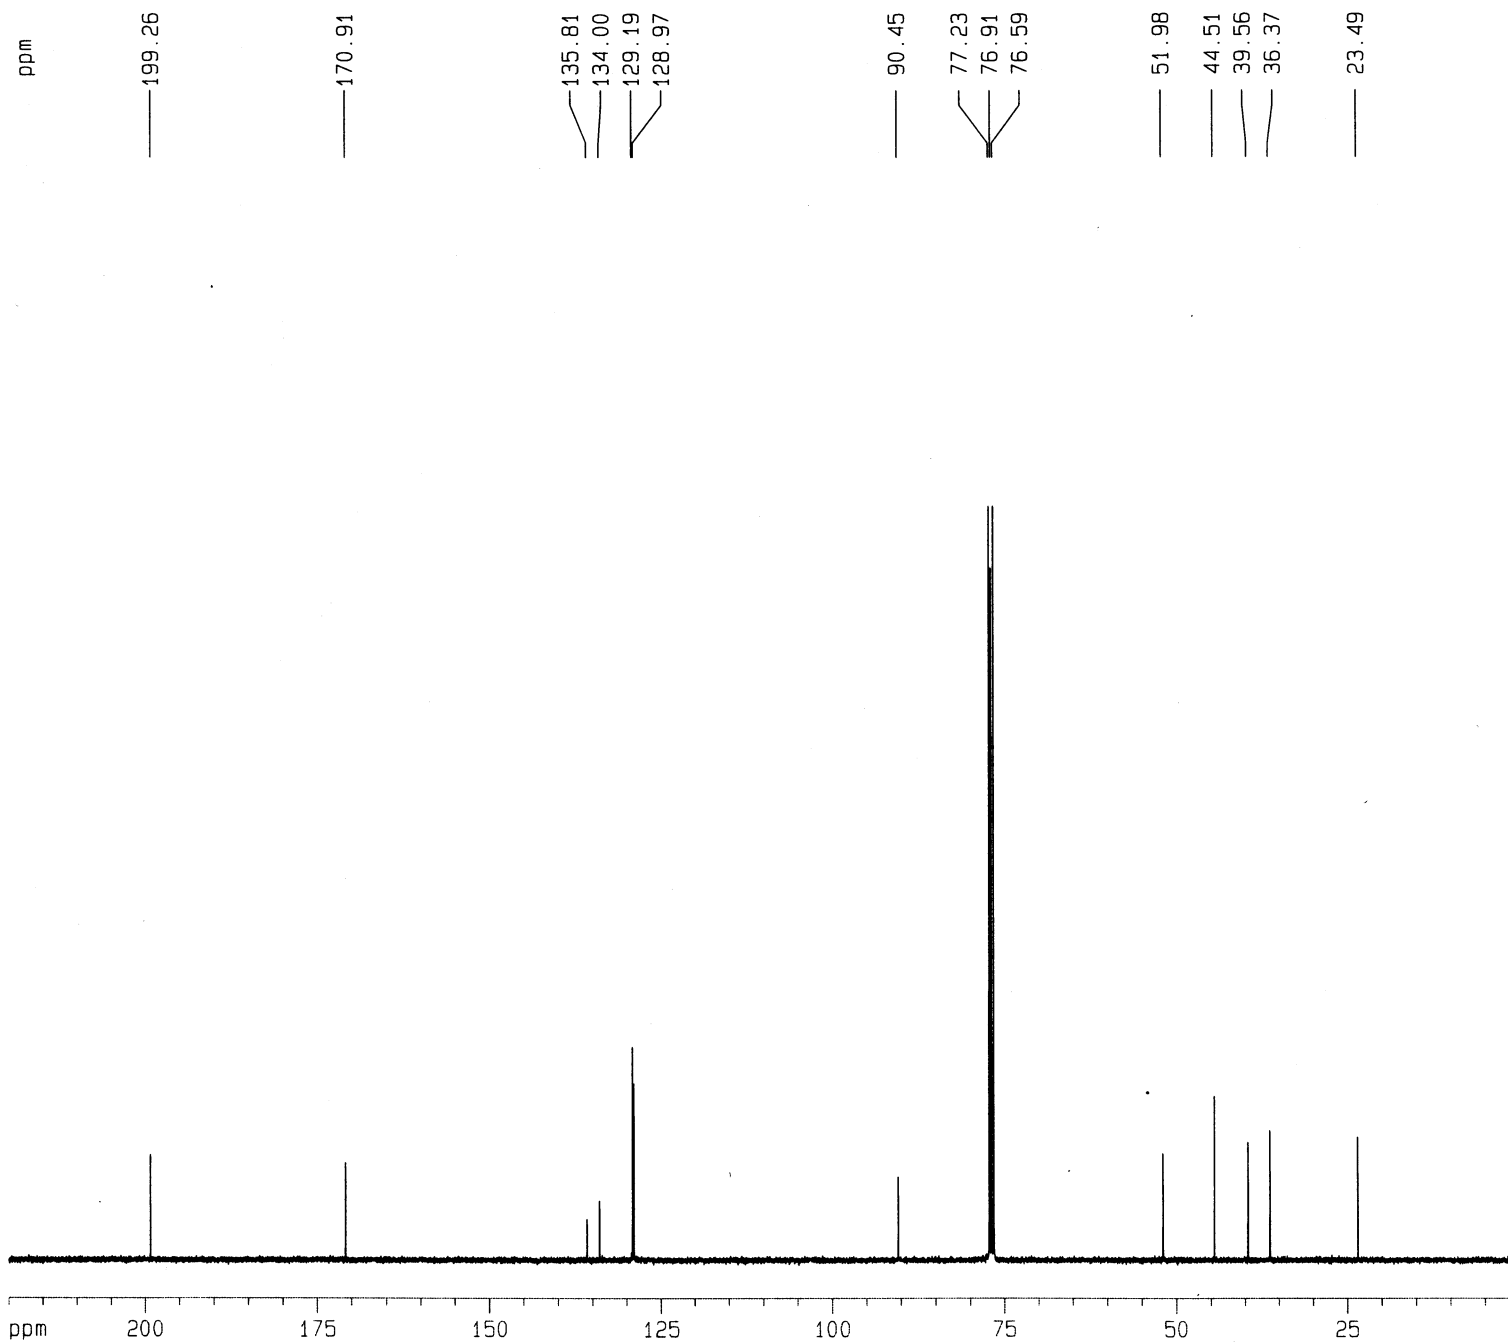

Current Data Parameters  
 NAME LCH-2-381-p2  
 EXPNO 3  
 PROCNO 1

F2 - Acquisition Parameters  
 Date\_ 20150327  
 Time 4.05  
 INSTRUM spect  
 PROBHD 5 mm QNP 1H  
 PULPROG zgpg30  
 TD 65536  
 SOLVENT CDC13  
 NS 3276  
 DS 4  
 SWH 25125.629 Hz  
 FIDRES 0.383387 Hz  
 AQ 1.3042164 sec  
 RG 256  
 DW 19.900 usec  
 DE 6.50 usec  
 TE 300.0 K  
 D1 2.0000000 sec  
 d11 0.03000000 sec  
 d12 0.00002000 sec

===== CHANNEL f1 =====  
 NUC1 13C  
 P1 10.20 usec  
 PL1 0.00 dB  
 SF01 100.6237959 MHz

===== CHANNEL f2 =====  
 CPDPRG2 waltz16  
 NUC2 1H  
 PCPD2 90.00 usec  
 PL2 -3.00 dB  
 PL12 14.50 dB  
 PL13 17.50 dB  
 SF02 400.1326008 MHz

F2 - Processing parameters  
 SI 32768  
 SF 100.6127807 MHz  
 WDW EM  
 SSB 0  
 LB 0.30 Hz  
 GB 0  
 PC 1.40

1D NMR plot parameters  
 CX 20.00 cm  
 F1P 220.000 ppm  
 F1 22134.81 Hz  
 F2P 0.000 ppm  
 F2 0.00 Hz  
 PPMCM 11.00000 ppm/cm  
 HZCM 1106.74060 Hz/cm

Fig S87. DEPT of compound anti-3c

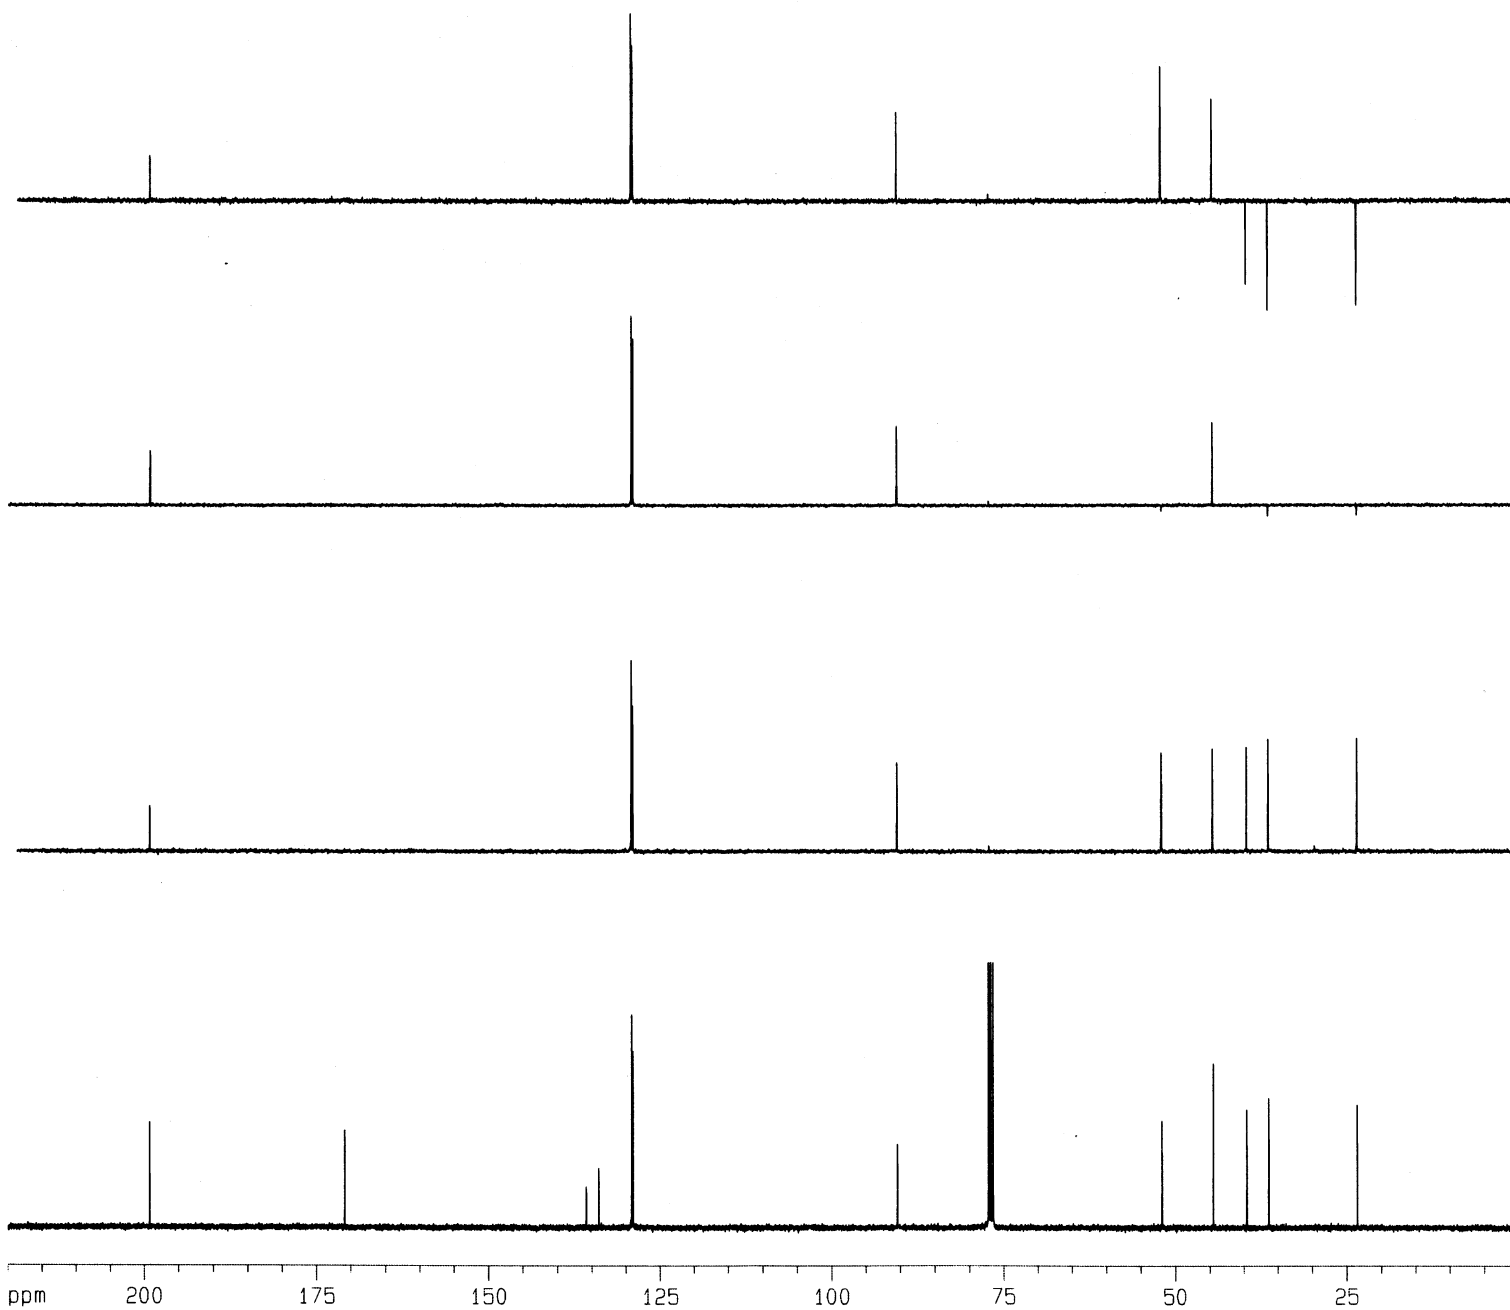

## Current Data Parameters

NAME LCH-2-381-p2  
 EXPNO 3  
 PROCNO 1

## F2 - Acquisition Parameters

Date\_ 20150327  
 Time 4.05  
 INSTRUM spect  
 PROBHD 5 mm QNP 1H  
 PULPROG zgpg30  
 TD 65536  
 SOLVENT CDC13  
 NS 3276  
 DS 4  
 SWH 25125.629 Hz  
 FIDRES 0.383387 Hz  
 AQ 1.3042164 sec  
 RG 256  
 DW 19.900 usec  
 DE 6.50 usec  
 TE 300.0 K  
 D1 2.0000000 sec  
 d11 0.0300000 sec  
 d12 0.00002000 sec

## ===== CHANNEL f1 =====

NUC1 13C  
 P1 10.20 usec  
 PL1 0.00 dB  
 SF01 100.6237959 MHz

## ===== CHANNEL f2 =====

CPDPRG2 waltz16  
 NUC2 1H  
 PCPD2 90.00 usec  
 PL2 -3.00 dB  
 PL12 14.50 dB  
 PL13 17.50 dB  
 SF02 400.1326008 MHz

## F2 - Processing parameters

SI 32768  
 SF 100.6127807 MHz  
 WDW EM  
 SSB 0  
 LB 0.30 Hz  
 GB 0  
 PC 1.40

## 1D NMR plot parameters

CX 20.00 cm  
 F1P 220.000 ppm  
 F1 22134.81 Hz  
 F2P 0.000 ppm  
 F2 0.00 Hz  
 PPMCM 11.00000 ppm/cm  
 HZCM 1106.74048 Hz/cm

Fig S88. <sup>1</sup>H NMR (CDCl<sub>3</sub>, 400 MHz) of compound syn-3d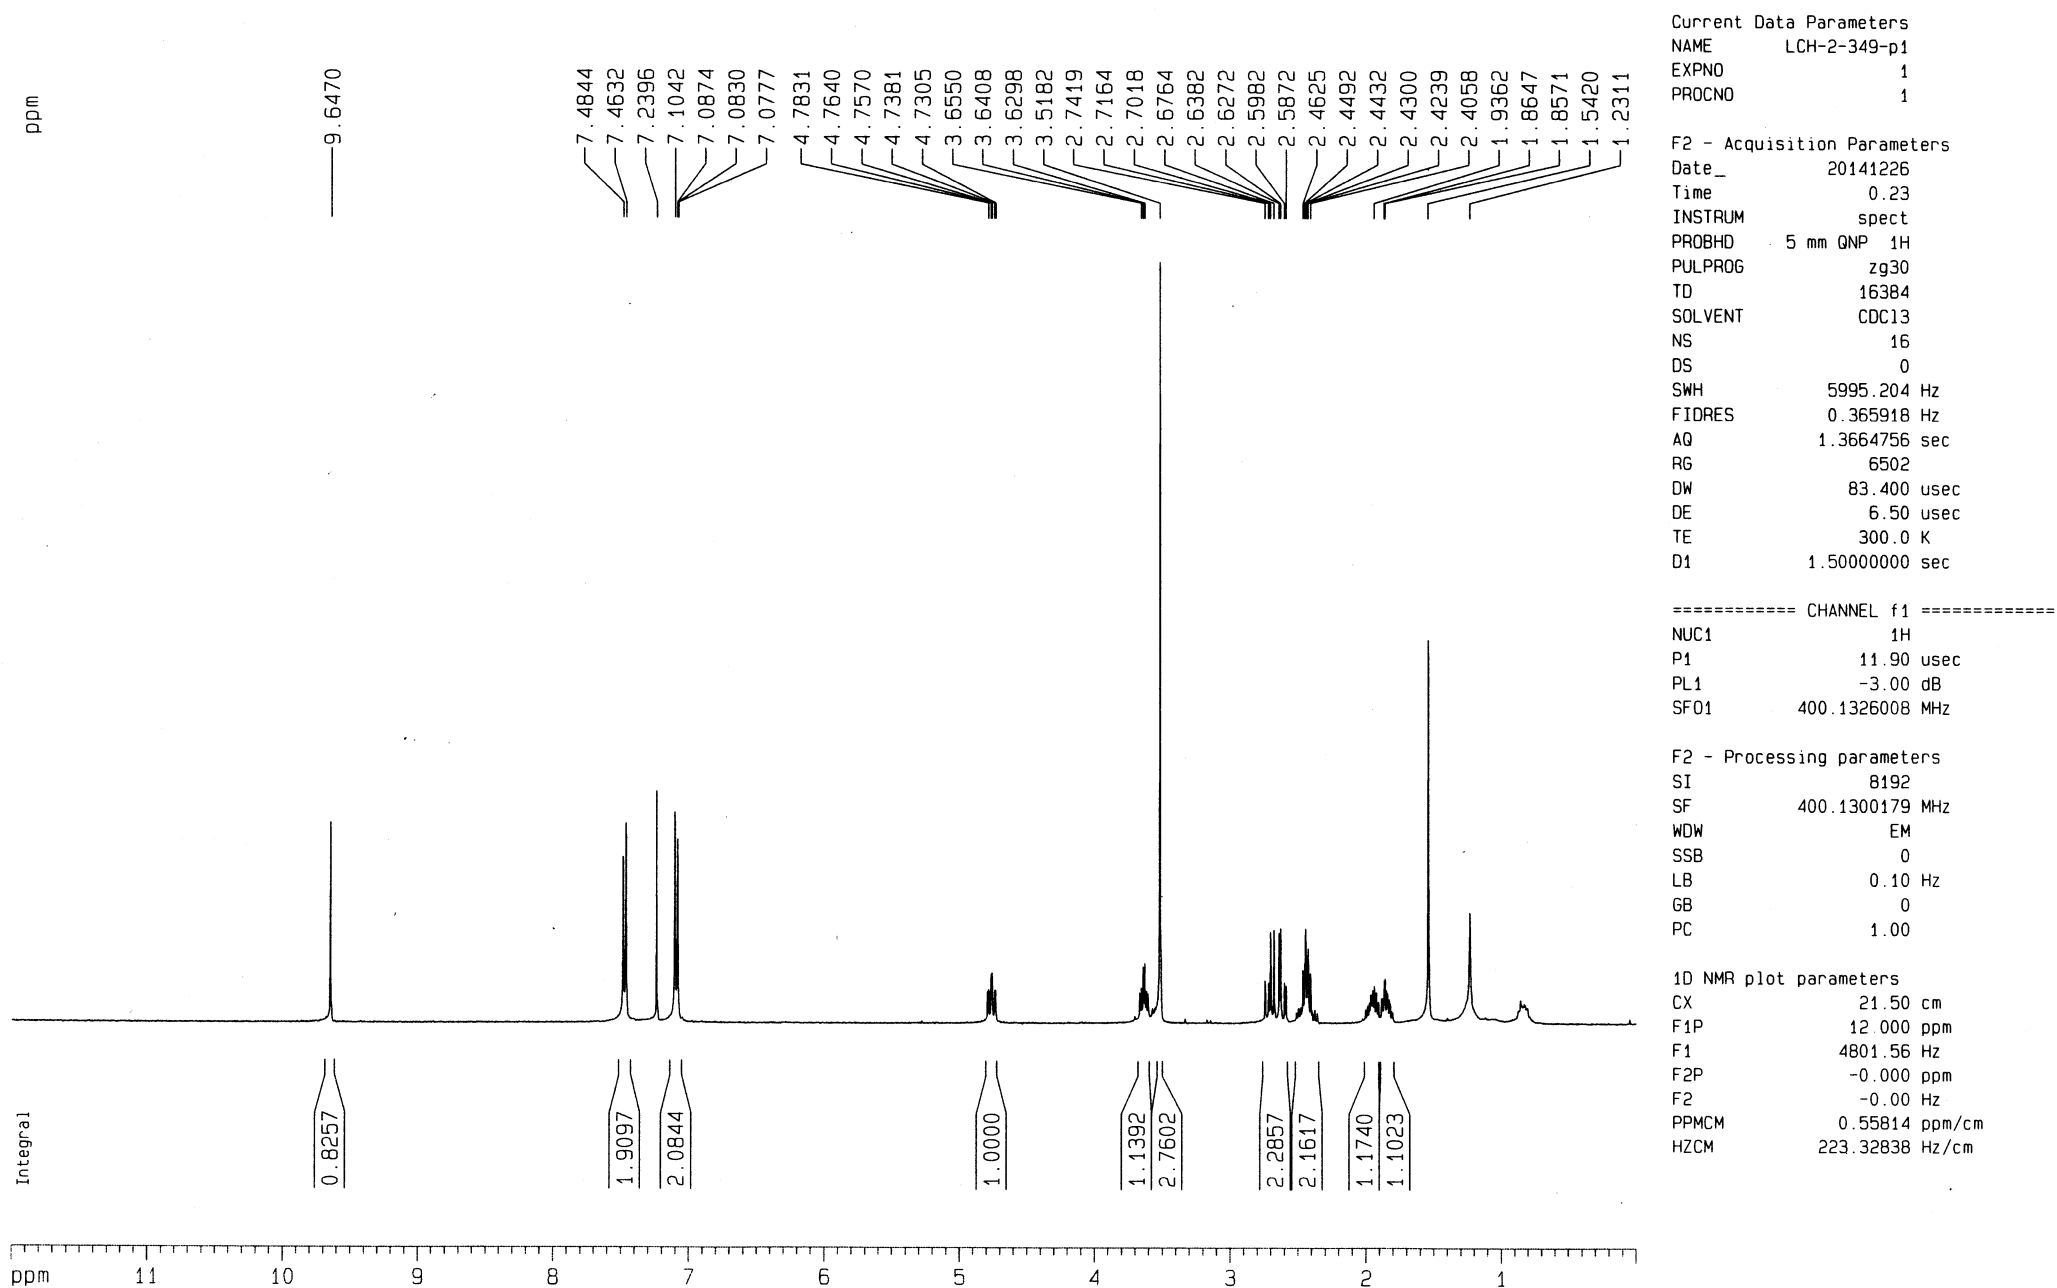

## C13 spectrum of

Fig S89. <sup>13</sup>C NMR (CDCl<sub>3</sub>, 100 MHz) of compound syn-3d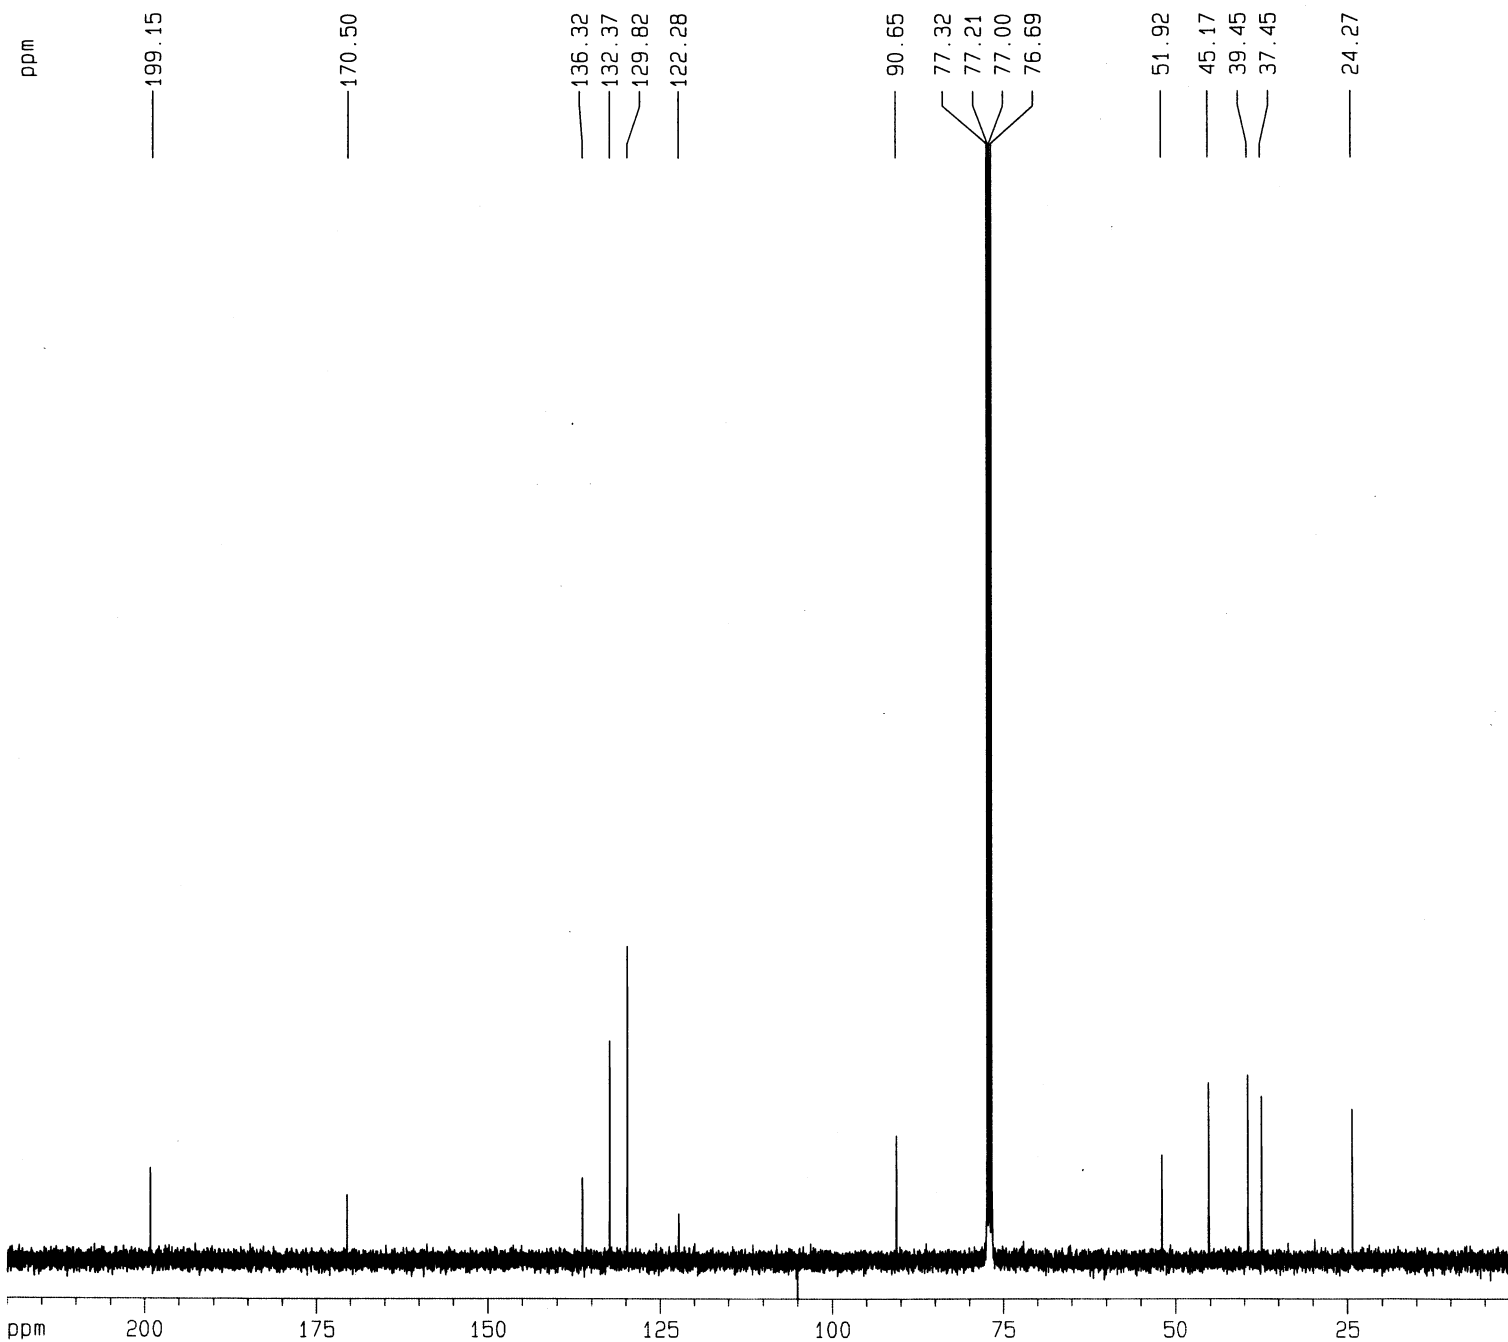

Current Data Parameters  
 NAME LCH-2-349-p1  
 EXPNO 2  
 PROCNO 1

F2 - Acquisition Parameters  
 Date\_ 20141226  
 Time 3.25  
 INSTRUM spect  
 PROBHD 5 mm QNP 1H  
 PULPROG zgpg30  
 TD 65536  
 SOLVENT CDCl3  
 NS 3276  
 DS 4  
 SWH 25125.629 Hz  
 FIDRES 0.383387 Hz  
 AQ 1.3042164 sec  
 RG 256  
 DW 19.900 usec  
 DE 6.50 usec  
 TE 300.0 K  
 D1 2.00000000 sec  
 d11 0.03000000 sec  
 d12 0.00002000 sec

===== CHANNEL f1 =====  
 NUC1 13C  
 P1 10.20 usec  
 PL1 0.00 dB  
 SF01 100.6237959 MHz

===== CHANNEL f2 =====  
 CPDPRG2 waltz16  
 NUC2 1H  
 PCPD2 90.00 usec  
 PL2 -3.00 dB  
 PL12 14.50 dB  
 PL13 17.50 dB  
 SF02 400.1326008 MHz

F2 - Processing parameters  
 SI 32768  
 SF 100.6127700 MHz  
 WDW EM  
 SSB 0  
 LB 0.30 Hz  
 GB 0  
 PC 1.40

1D NMR plot parameters  
 CX 20.00 cm  
 F1P 220.000 ppm  
 F1 22134.81 Hz  
 F2P 0.000 ppm  
 F2 0.00 Hz  
 PPMCM 11.00000 ppm/cm  
 HZCM 1106.74048 Hz/cm

Fig S90. DEPT of compound syn-3d

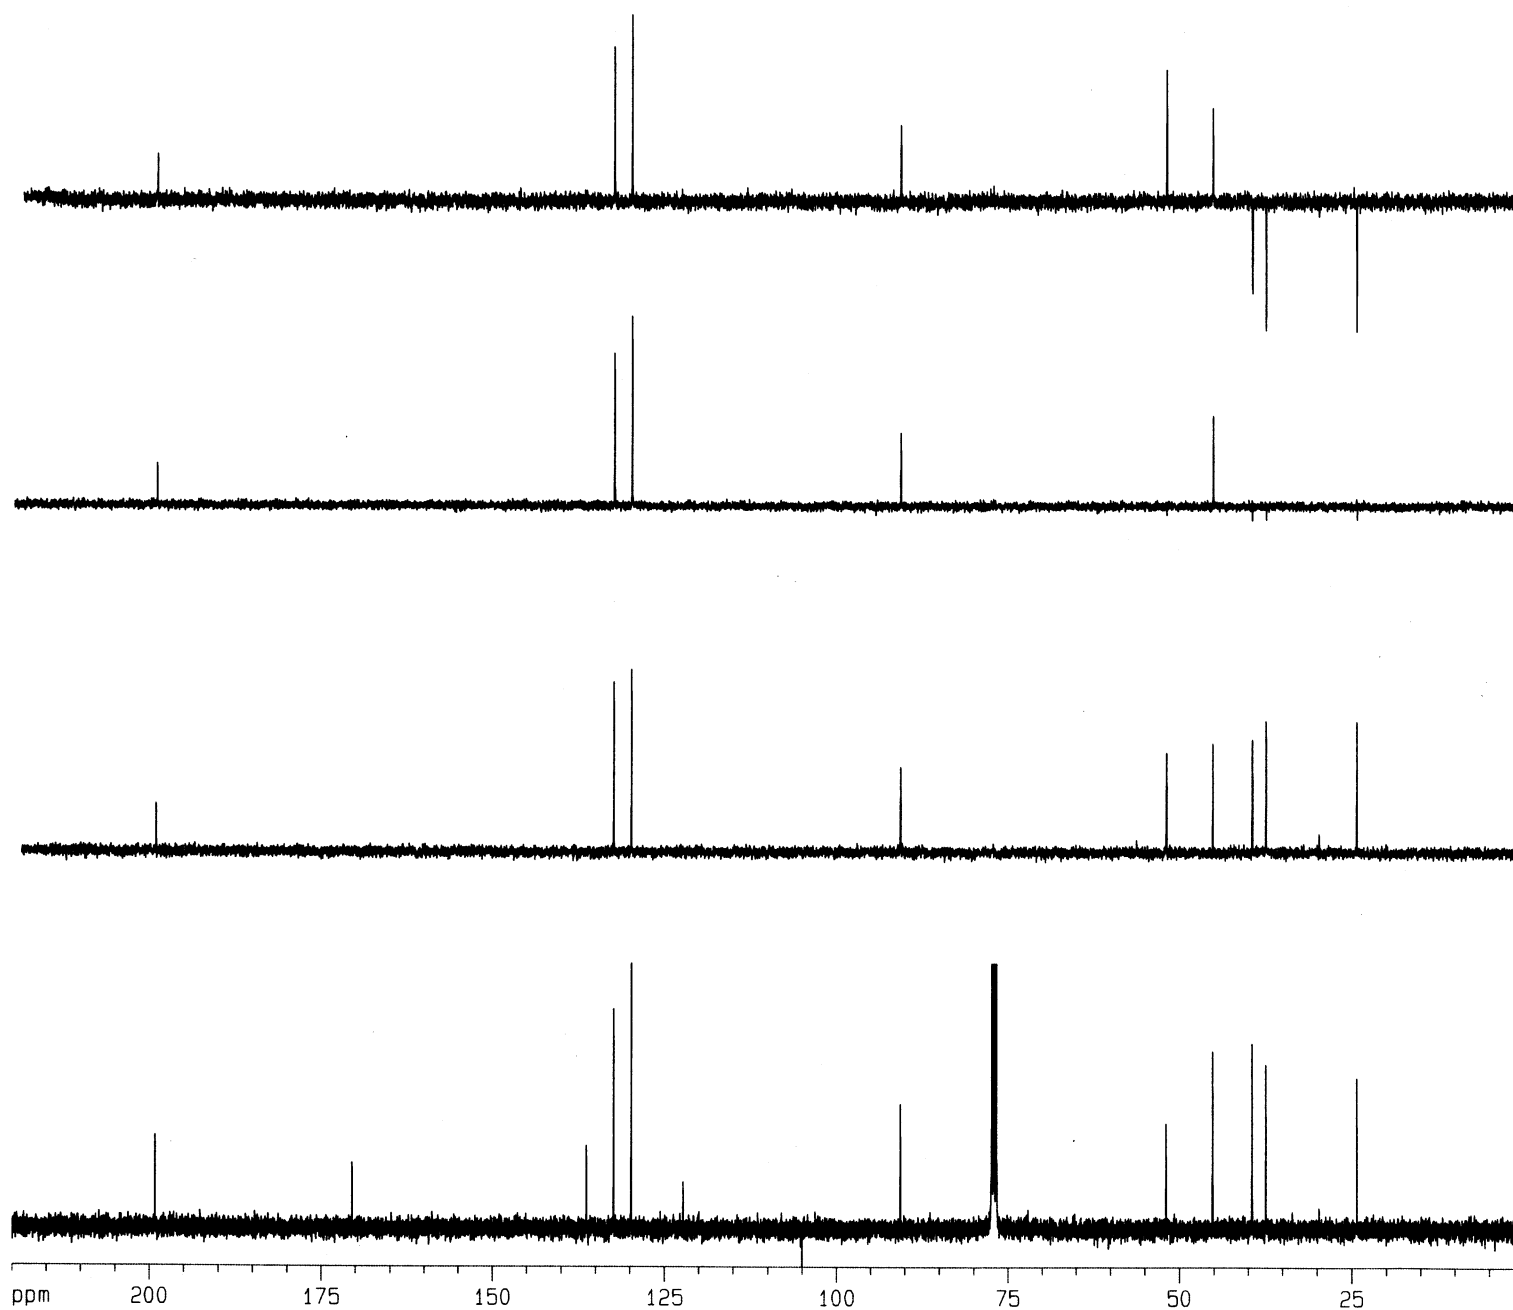

## Current Data Parameters

NAME LCH-2-349-p1  
 EXPNO 2  
 PROCNO 1

## F2 - Acquisition Parameters

Date\_ 20141226  
 Time 3.25  
 INSTRUM spect  
 PROBHD 5 mm QNP 1H  
 PULPROG zgpg30  
 TD 65536  
 SOLVENT CDC13  
 NS 3276  
 DS 4  
 SWH 25125.629 Hz  
 FIDRES 0.383387 Hz  
 AQ 1.3042164 sec  
 RG 256  
 DW 19.900 usec  
 DE 6.50 usec  
 TE 300.0 K  
 D1 2.0000000 sec  
 d11 0.0300000 sec  
 d12 0.00002000 sec

## ===== CHANNEL f1 =====

NUC1 13C  
 P1 10.20 usec  
 PL1 0.00 dB  
 SF01 100.6237959 MHz

## ===== CHANNEL f2 =====

CPDPRG2 waltz16  
 NUC2 1H  
 PCPD2 90.00 usec  
 PL2 -3.00 dB  
 PL12 14.50 dB  
 PL13 17.50 dB  
 SF02 400.1326008 MHz

## F2 - Processing parameters

SI 32768  
 SF 100.6127700 MHz  
 WDW EM  
 SSB 0  
 LB 0.30 Hz  
 GB 0  
 PC 1.40

## 1D NMR plot parameters

CX 20.00 cm  
 F1P 220.000 ppm  
 F1 22134.81 Hz  
 F2P 0.000 ppm  
 F2 0.00 Hz  
 PPMCM 11.00000 ppm/cm  
 HZCM 1106.74048 Hz/cm

Fig S91. <sup>1</sup>H NMR (CDCl<sub>3</sub>, 400 MHz) of compound anti-3d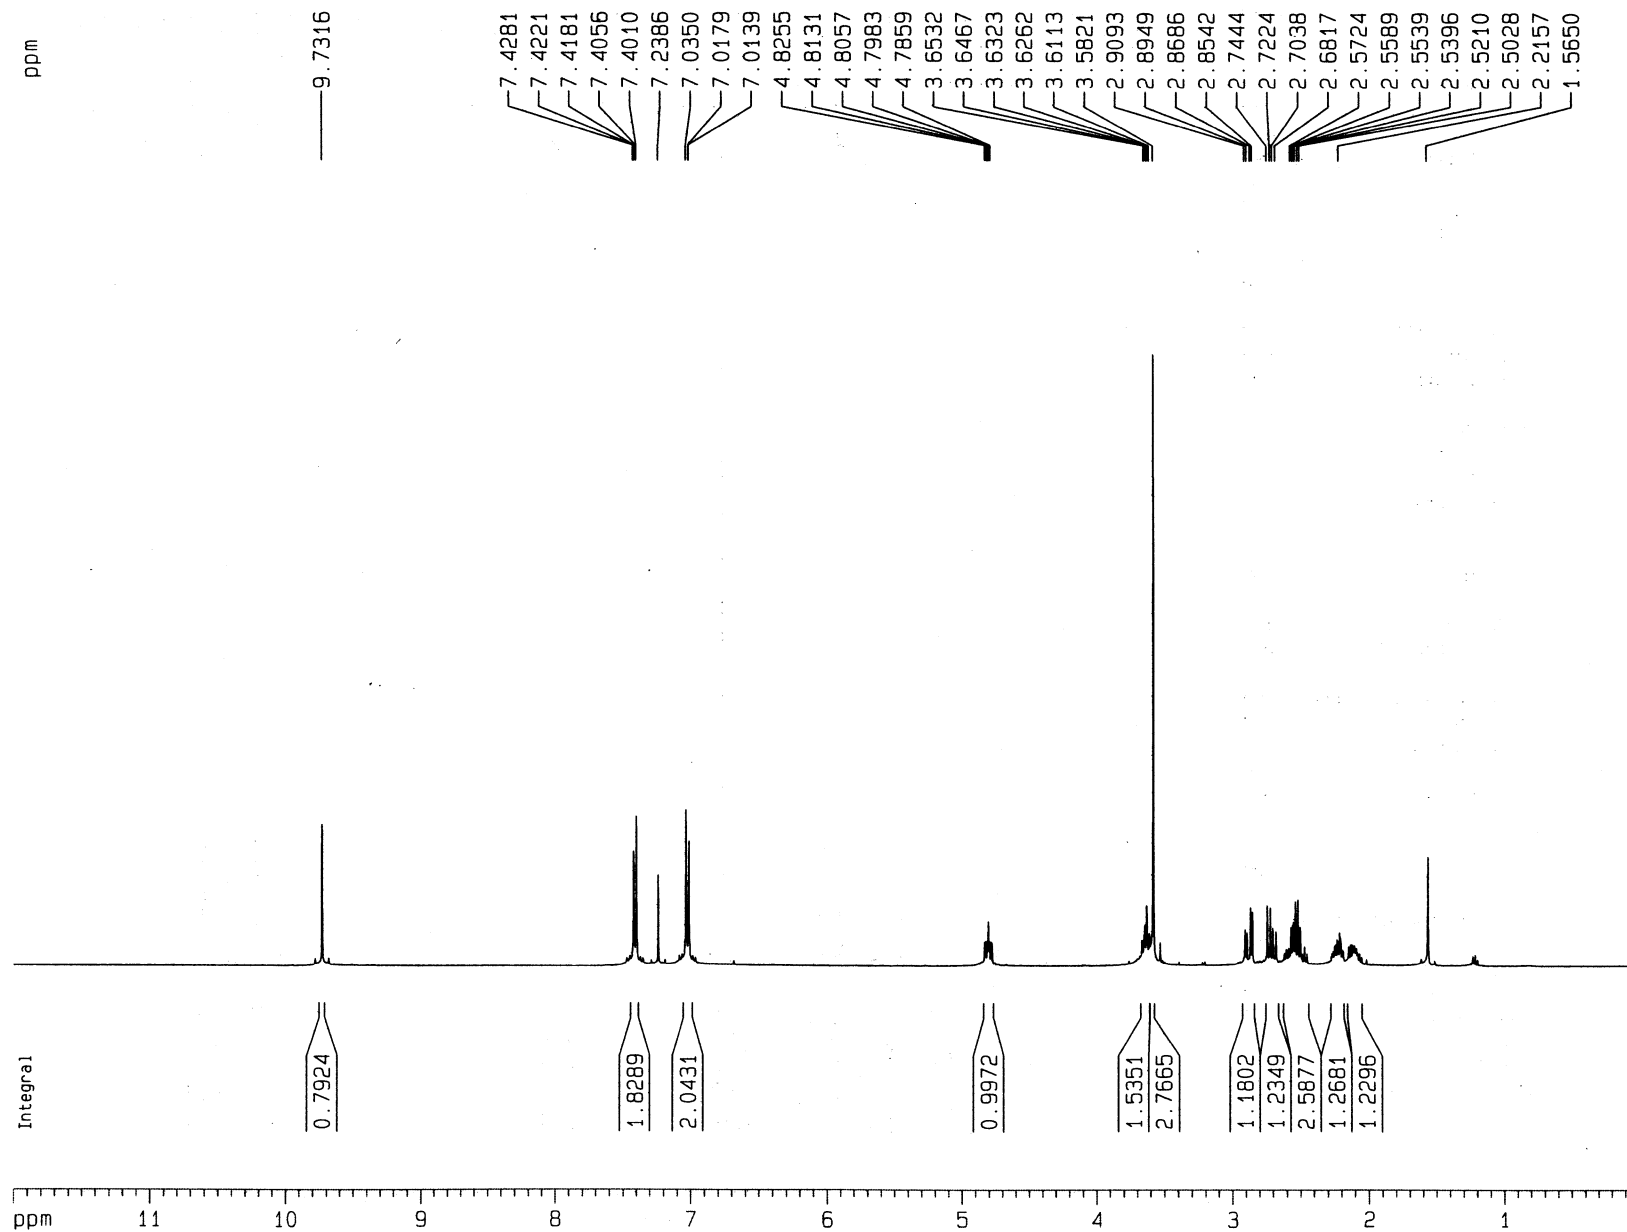

## Current Data Parameters

NAME LCH-2-349-p2  
 EXPNO 1  
 PROCNO 1

## F2 - Acquisition Parameters

Date\_ 20141227  
 Time 0.00  
 INSTRUM spect  
 PROBHD 5 mm QNP 1H  
 PULPROG zg30  
 TD 16384  
 SOLVENT CDCl3  
 NS 16  
 DS 0  
 SWH 5995.204 Hz  
 FIDRES 0.365918 Hz  
 AQ 1.3664756 sec  
 RG 3251  
 DW 83.400 usec  
 DE 6.50 usec  
 TE 300.0 K  
 D1 1.5000000 sec

## ===== CHANNEL f1 =====

NUC1 1H  
 P1 11.90 usec  
 PL1 -3.00 dB  
 SF01 400.1326008 MHz

## F2 - Processing parameters

SI 8192  
 SF 400.1300179 MHz  
 WDW EM  
 SSB 0  
 LB 0.10 Hz  
 GB 0  
 PC 1.00

## 1D NMR plot parameters

CX 21.50 cm  
 F1P 12.000 ppm  
 F1 4801.56 Hz  
 F2P -0.000 ppm  
 F2 -0.00 Hz  
 PPMCM 0.55814 ppm/cm  
 HZCM 223.32837 Hz/cm

## C13 spectrum of

Fig S92. 13C NMR (CDCl3, 100 MHz) of compound anti-3d

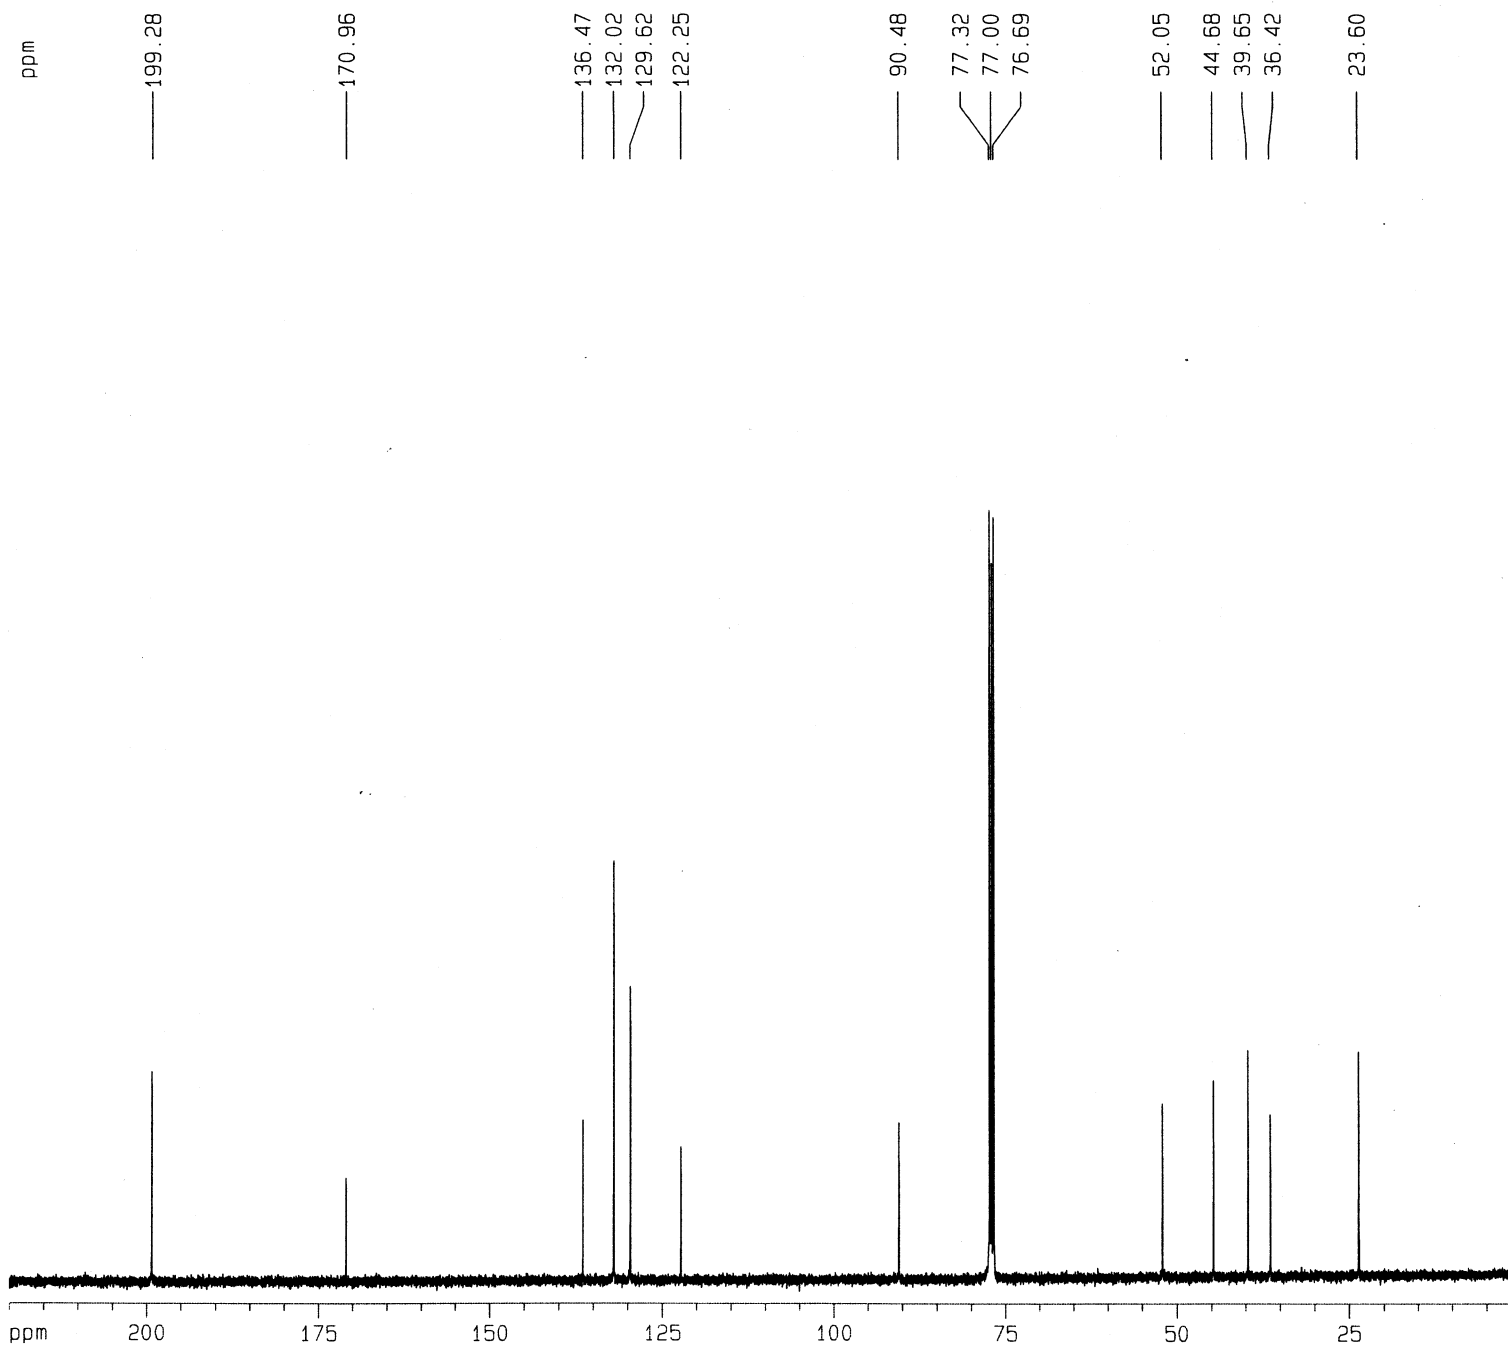

Current Data Parameters  
 NAME LCH-2-349-p2  
 EXPNO 2  
 PROCNO 1

F2 - Acquisition Parameters  
 Date\_ 20141227  
 Time 3.02  
 INSTRUM spect  
 PROBHD 5 mm QNP 1H  
 PULPROG zgpg30  
 TD 65536  
 SOLVENT CDCl3  
 NS 3276  
 DS 4  
 SWH 25125.629 Hz  
 FIDRES 0.383387 Hz  
 AQ 1.3042164 sec  
 RG 256  
 DW 19.900 usec  
 DE 6.50 usec  
 TE 300.0 K  
 D1 2.00000000 sec  
 d11 0.03000000 sec  
 d12 0.00002000 sec

===== CHANNEL f1 =====  
 NUC1 13C  
 P1 10.20 usec  
 PL1 0.00 dB  
 SF01 100.6237959 MHz

===== CHANNEL f2 =====  
 CPDPRG2 waltz16  
 NUC2 1H  
 PCPD2 90.00 usec  
 PL2 -3.00 dB  
 PL12 14.50 dB  
 PL13 17.50 dB  
 SF02 400.1326008 MHz

F2 - Processing parameters  
 SI 32768  
 SF 100.6127700 MHz  
 WDW EM  
 SSB 0  
 LB 0.30 Hz  
 GB 0  
 PC 1.40

1D NMR plot parameters  
 CX 20.00 cm  
 F1P 220.000 ppm  
 F1 22134.81 Hz  
 F2P 0.000 ppm  
 F2 0.00 Hz  
 PPMCM 11.00000 ppm/cm  
 HZCM 1106.74048 Hz/cm



Fig S93. DEPT of compound anti-3d

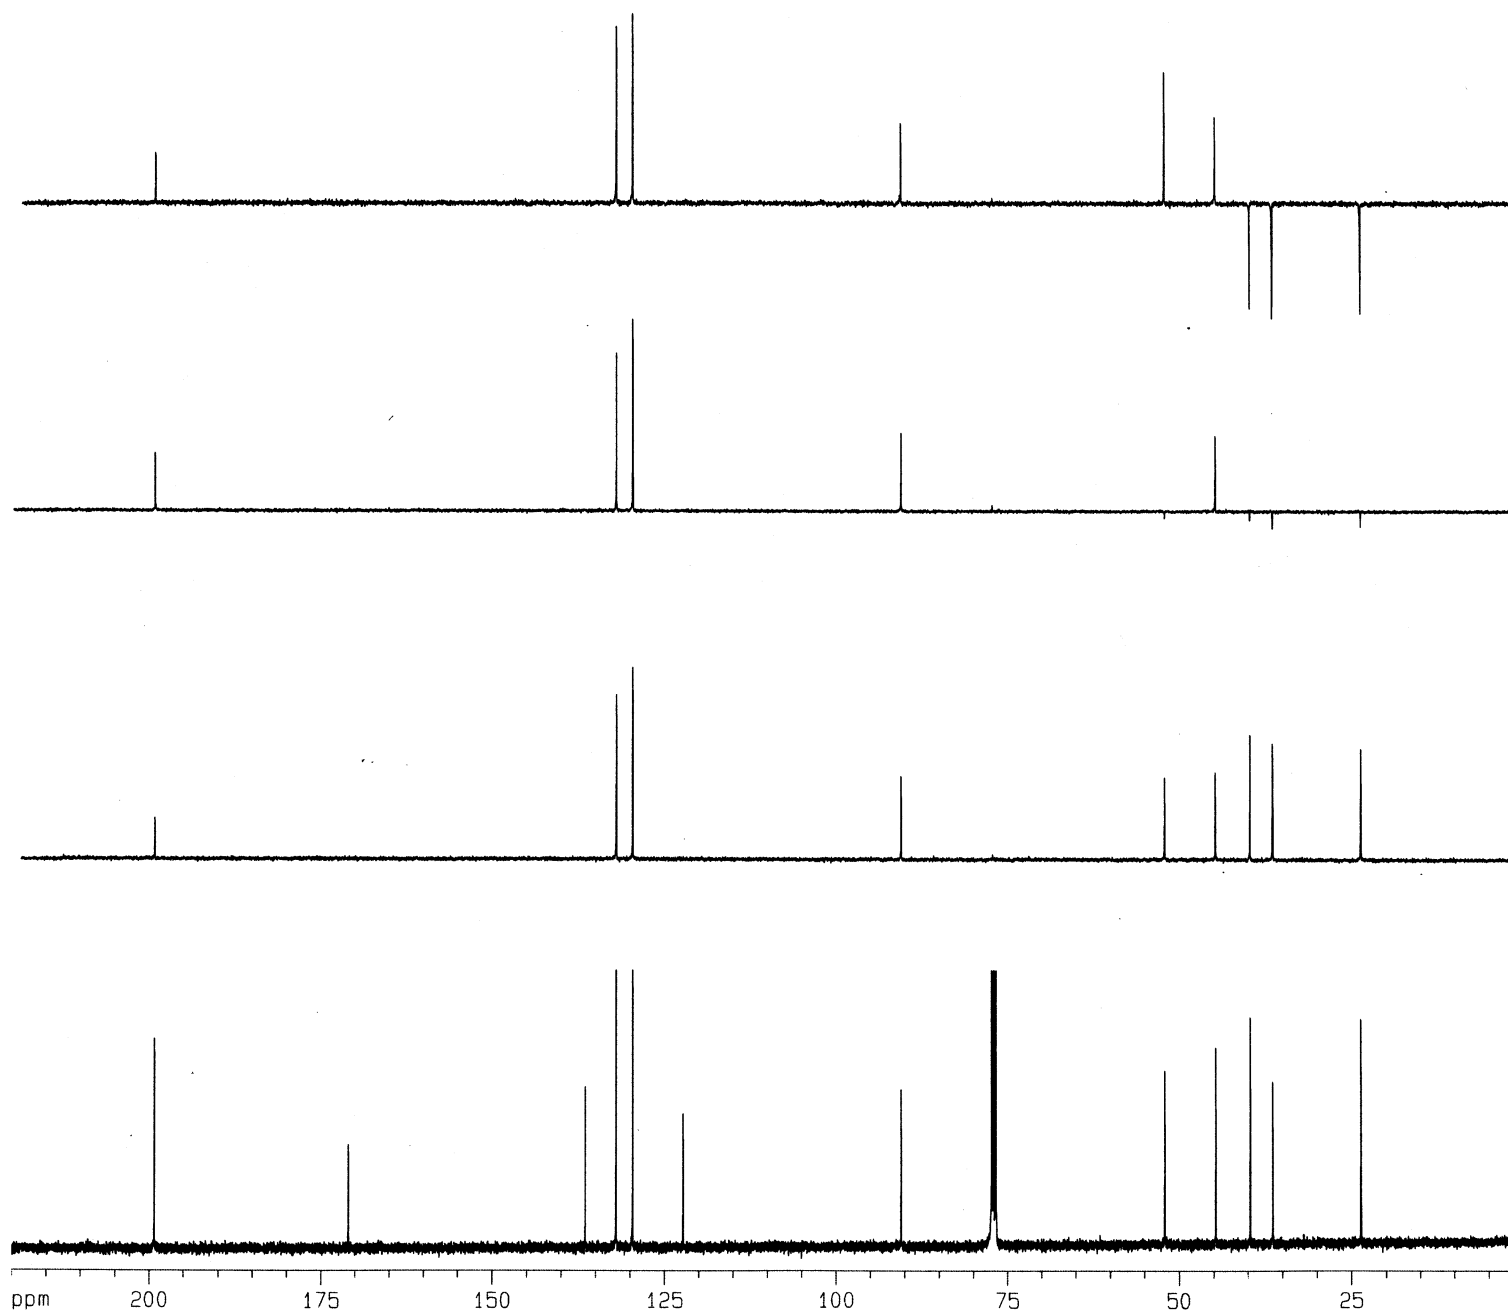

## Current Data Parameters

NAME LCH-2-349-p2  
EXPNO 2  
PROCNO 1

## F2 - Acquisition Parameters

Date\_ 20141227  
Time 3.02  
INSTRUM spect  
PROBHD 5 mm QNP 1H  
PULPROG zgpg30  
TD 65536  
SOLVENT CDCl3  
NS 3276  
DS 4  
SWH 25125.629 Hz  
FIDRES 0.383387 Hz  
AQ 1.3042164 sec  
RG 256  
DW 19.900 usec  
DE 6.50 usec  
TE 300.0 K  
D1 2.0000000 sec  
d11 0.0300000 sec  
d12 0.0000200 sec

## ===== CHANNEL f1 =====

NUC1 13C  
P1 10.20 usec  
PL1 0.00 dB  
SF01 100.6237959 MHz

## ===== CHANNEL f2 =====

CPDPRG2 waltz16  
NUC2 1H  
PCPD2 90.00 usec  
PL2 -3.00 dB  
PL12 14.50 dB  
PL13 17.50 dB  
SF02 400.1326008 MHz

## F2 - Processing parameters

SI 32768  
SF 100.6127700 MHz  
WDW EM  
SSB 0  
LB 0.30 Hz  
GB 0  
PC 1.40

## 1D NMR plot parameters

CX 20.00 cm  
F1P 220.000 ppm  
F1 22134.81 Hz  
F2P 0.000 ppm  
F2 0.00 Hz  
PPMCM 11.00000 ppm/cm  
HZCM 1106.74048 Hz/cm

Fig S94. <sup>1</sup>H NMR (CDCl<sub>3</sub>, 400 MHz) of compound syn-3e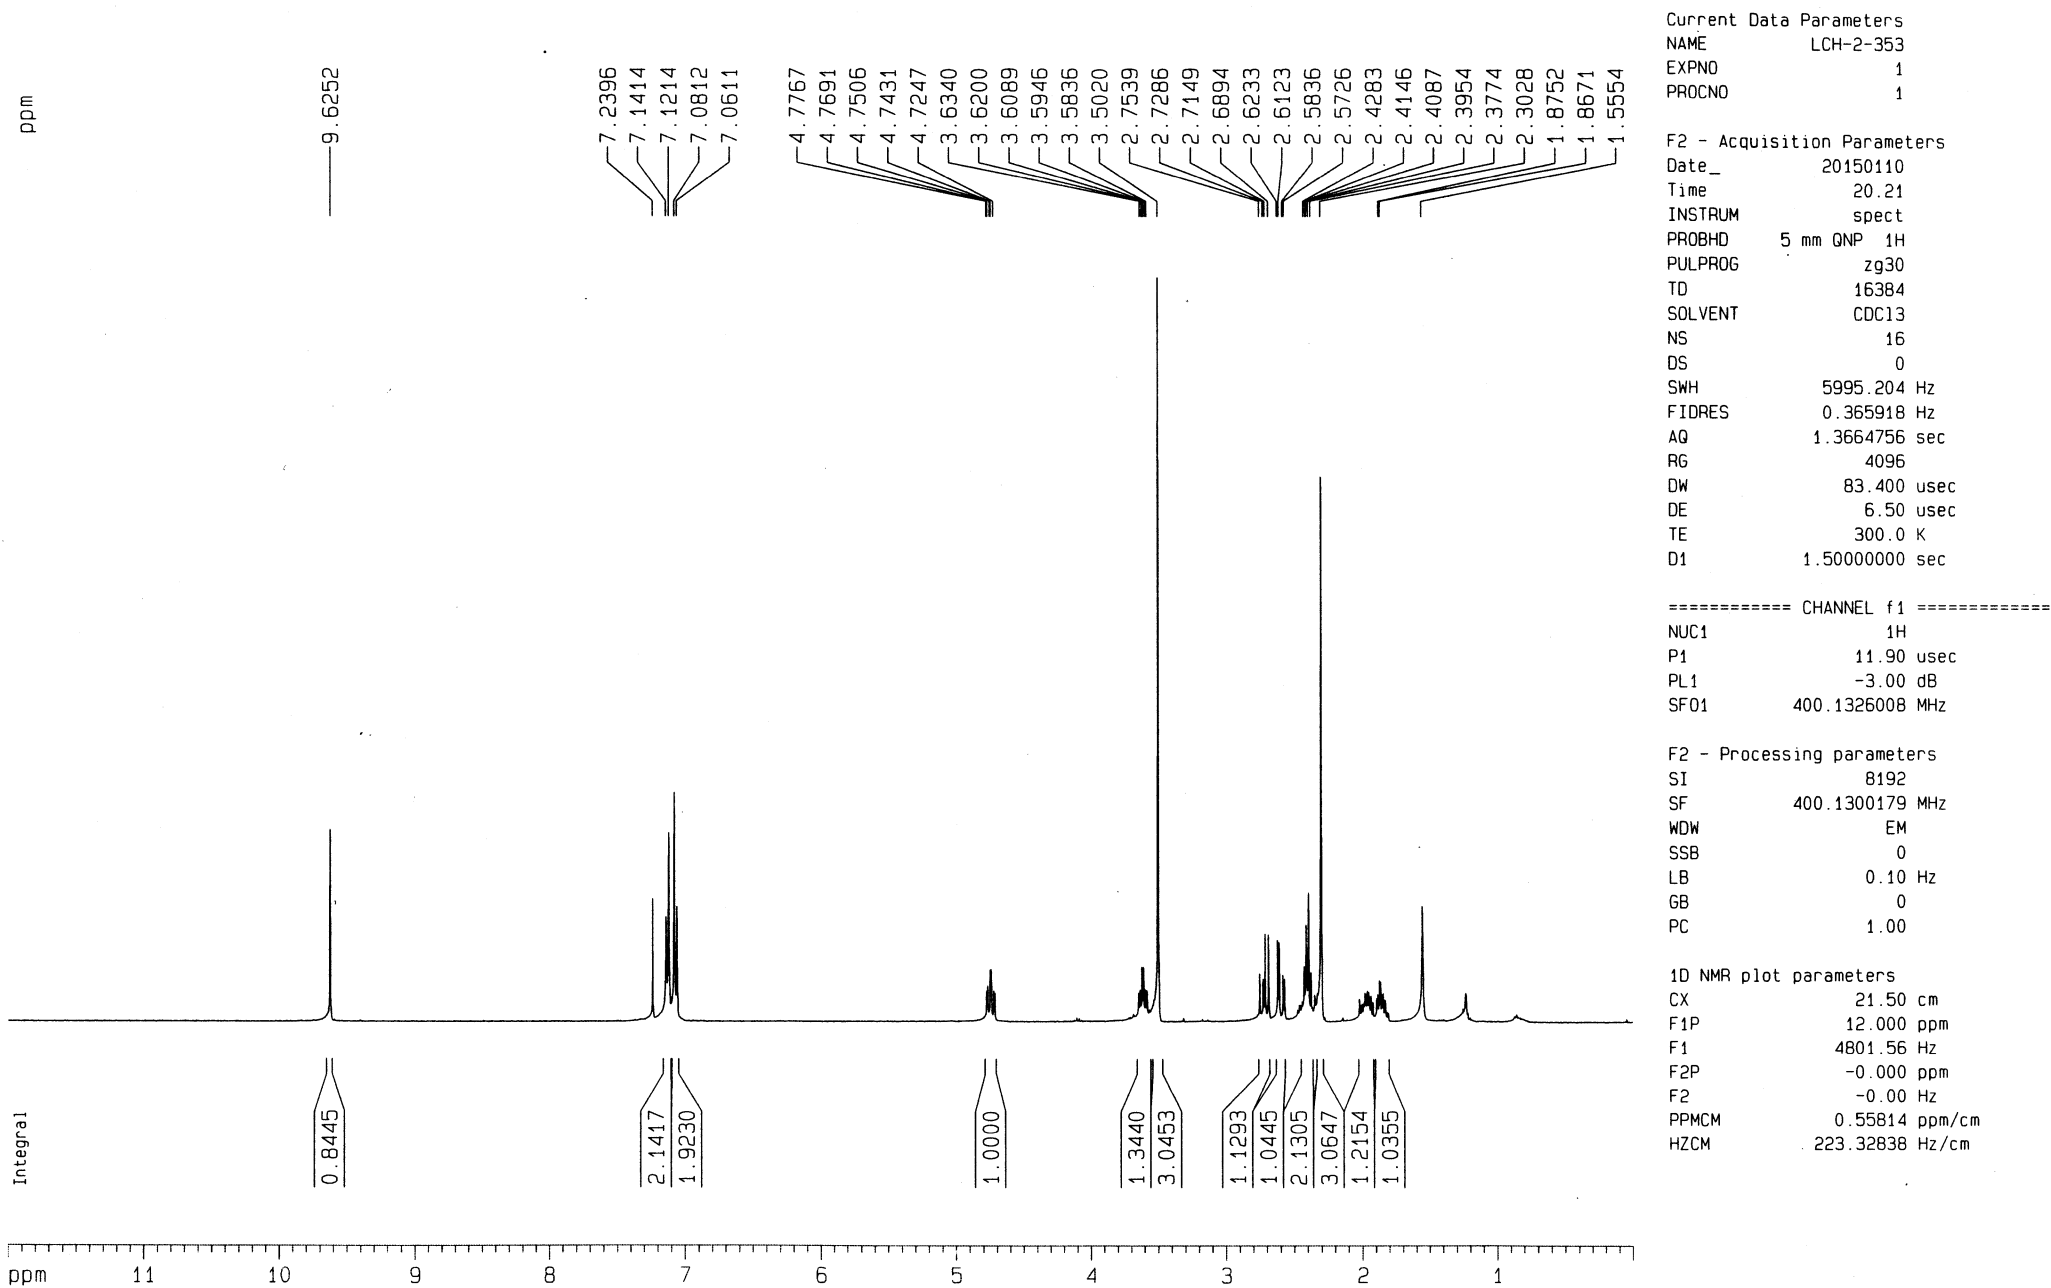

## C13 spectrum of

Fig S95. 13C NMR (CDCl3, 100 MHz) of compound syn-3e

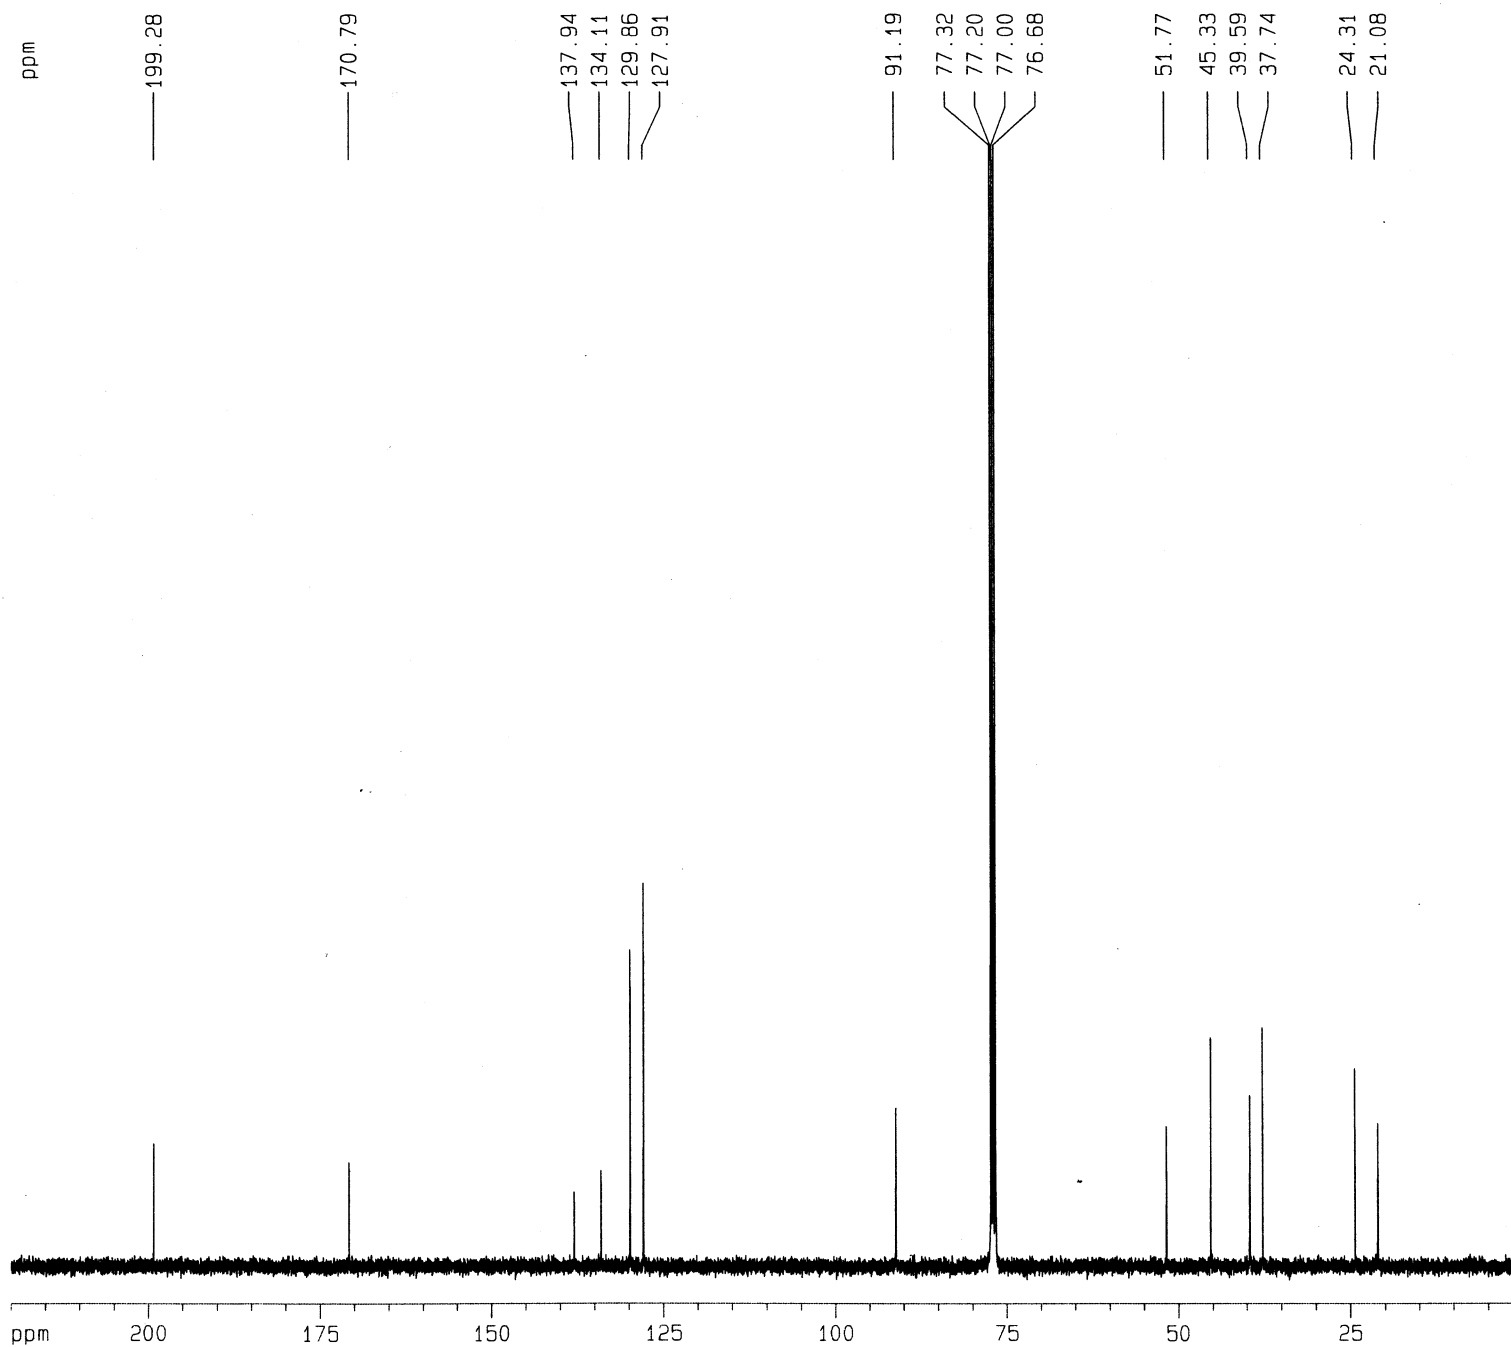

Current Data Parameters  
 NAME LCH-2-353  
 EXPNO 2  
 PROCNO 1

F2 - Acquisition Parameters  
 Date\_ 20150110  
 Time 23.46  
 INSTRUM spect  
 PROBHD 5 mm GNP 1H  
 PULPROG zgpg30  
 TD 65536  
 SOLVENT CDCl3  
 NS 3686  
 DS 4  
 SWH 25125.629 Hz  
 FIDRES 0.383387 Hz  
 AQ 1.3042164 sec  
 RG 256  
 DW 19.900 usec  
 DE 6.50 usec  
 TE 300.0 K  
 D1 2.0000000 sec  
 d11 0.0300000 sec  
 d12 0.0000200 sec

===== CHANNEL f1 =====  
 NUC1 13C  
 P1 10.20 usec  
 PL1 0.00 dB  
 SF01 100.6237959 MHz

===== CHANNEL f2 =====  
 CPDPRG2 waltz16  
 NUC2 1H  
 PCPD2 90.00 usec  
 PL2 -3.00 dB  
 PL12 14.50 dB  
 PL13 17.50 dB  
 SF02 400.1326008 MHz

F2 - Processing parameters  
 SI 32768  
 SF 100.6127715 MHz  
 WDW EM  
 SSB 0  
 LB 0.30 Hz  
 GB 0  
 PC 1.40

1D NMR plot parameters  
 CX 20.00 cm  
 F1P 220.000 ppm  
 F1 22134.81 Hz  
 F2P 0.000 ppm  
 F2 0.00 Hz  
 PPMCM 11.00000 ppm/cm  
 HZCM 1106.74048 Hz/cm

Fig S96. DEPT of compound syn-3e

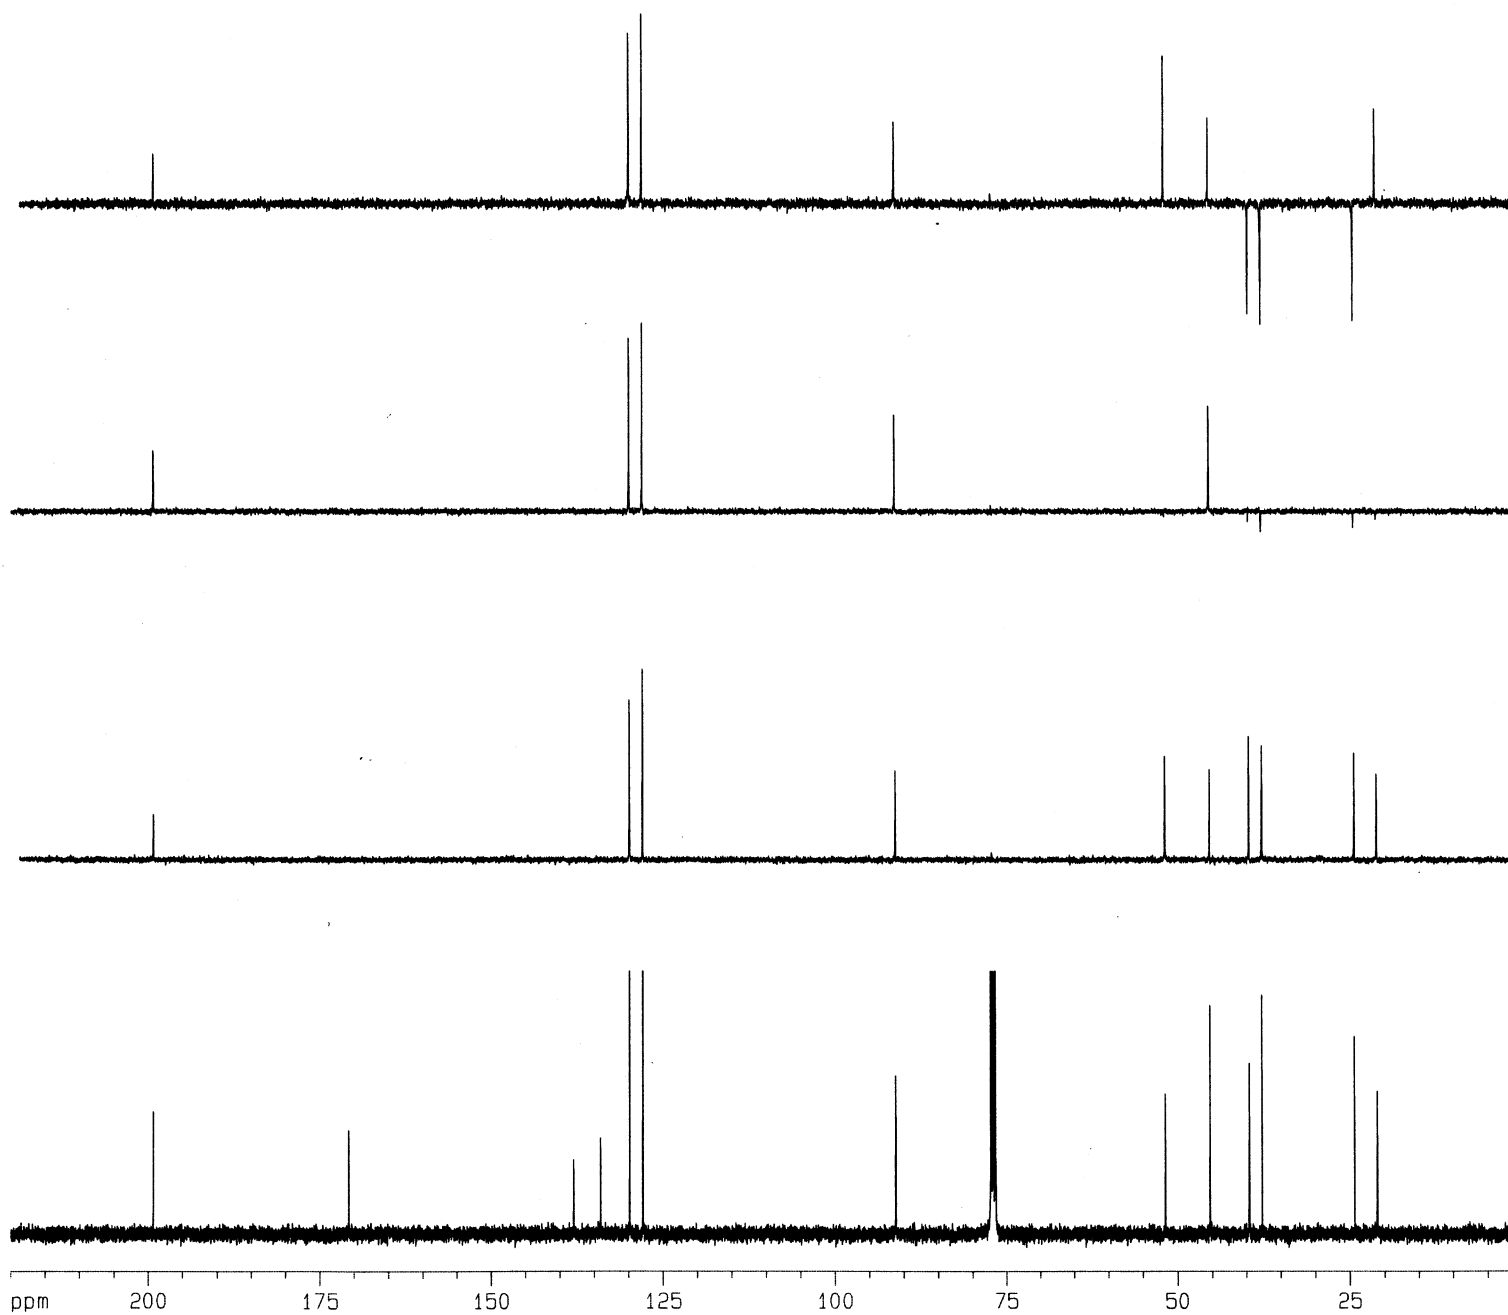

Current Data Parameters  
 NAME LCH-2-353  
 EXPNO 2  
 PROCNO 1

F2 - Acquisition Parameters  
 Date\_ 20150110  
 Time 23.46  
 INSTRUM spect  
 PROBHD 5 mm QNP 1H  
 PULPROG zgpg30  
 TD 65536  
 SOLVENT CDC13  
 NS 3686  
 DS 4  
 SWH 25125.629 Hz  
 FIDRES 0.383387 Hz  
 AQ 1.3042164 sec  
 RG 256  
 DW 19.900 usec  
 DE 6.50 usec  
 TE 300.0 K  
 D1 2.0000000 sec  
 d11 0.0300000 sec  
 d12 0.0000200 sec

===== CHANNEL f1 =====  
 NUC1 13C  
 P1 10.20 usec  
 PL1 0.00 dB  
 SF01 100.6237959 MHz

===== CHANNEL f2 =====  
 CPDPRG2 waltz16  
 NUC2 1H  
 PCPD2 90.00 usec  
 PL2 -3.00 dB  
 PL12 14.50 dB  
 PL13 17.50 dB  
 SF02 400.1326008 MHz

F2 - Processing parameters  
 SI 32768  
 SF 100.6127715 MHz  
 WDW EM  
 SSB 0  
 LB 0.30 Hz  
 GB 0  
 PC 1.40

1D NMR plot parameters  
 CX 20.00 cm  
 F1P 220.000 ppm  
 F1 22134.81 Hz  
 F2P 0.000 ppm  
 F2 0.00 Hz  
 PPMCM 11.00000 ppm/cm  
 HZCM 1106.74048 Hz/cm

Fig S97. <sup>1</sup>H NMR (CDCl<sub>3</sub>, 400 MHz) of compound anti-3e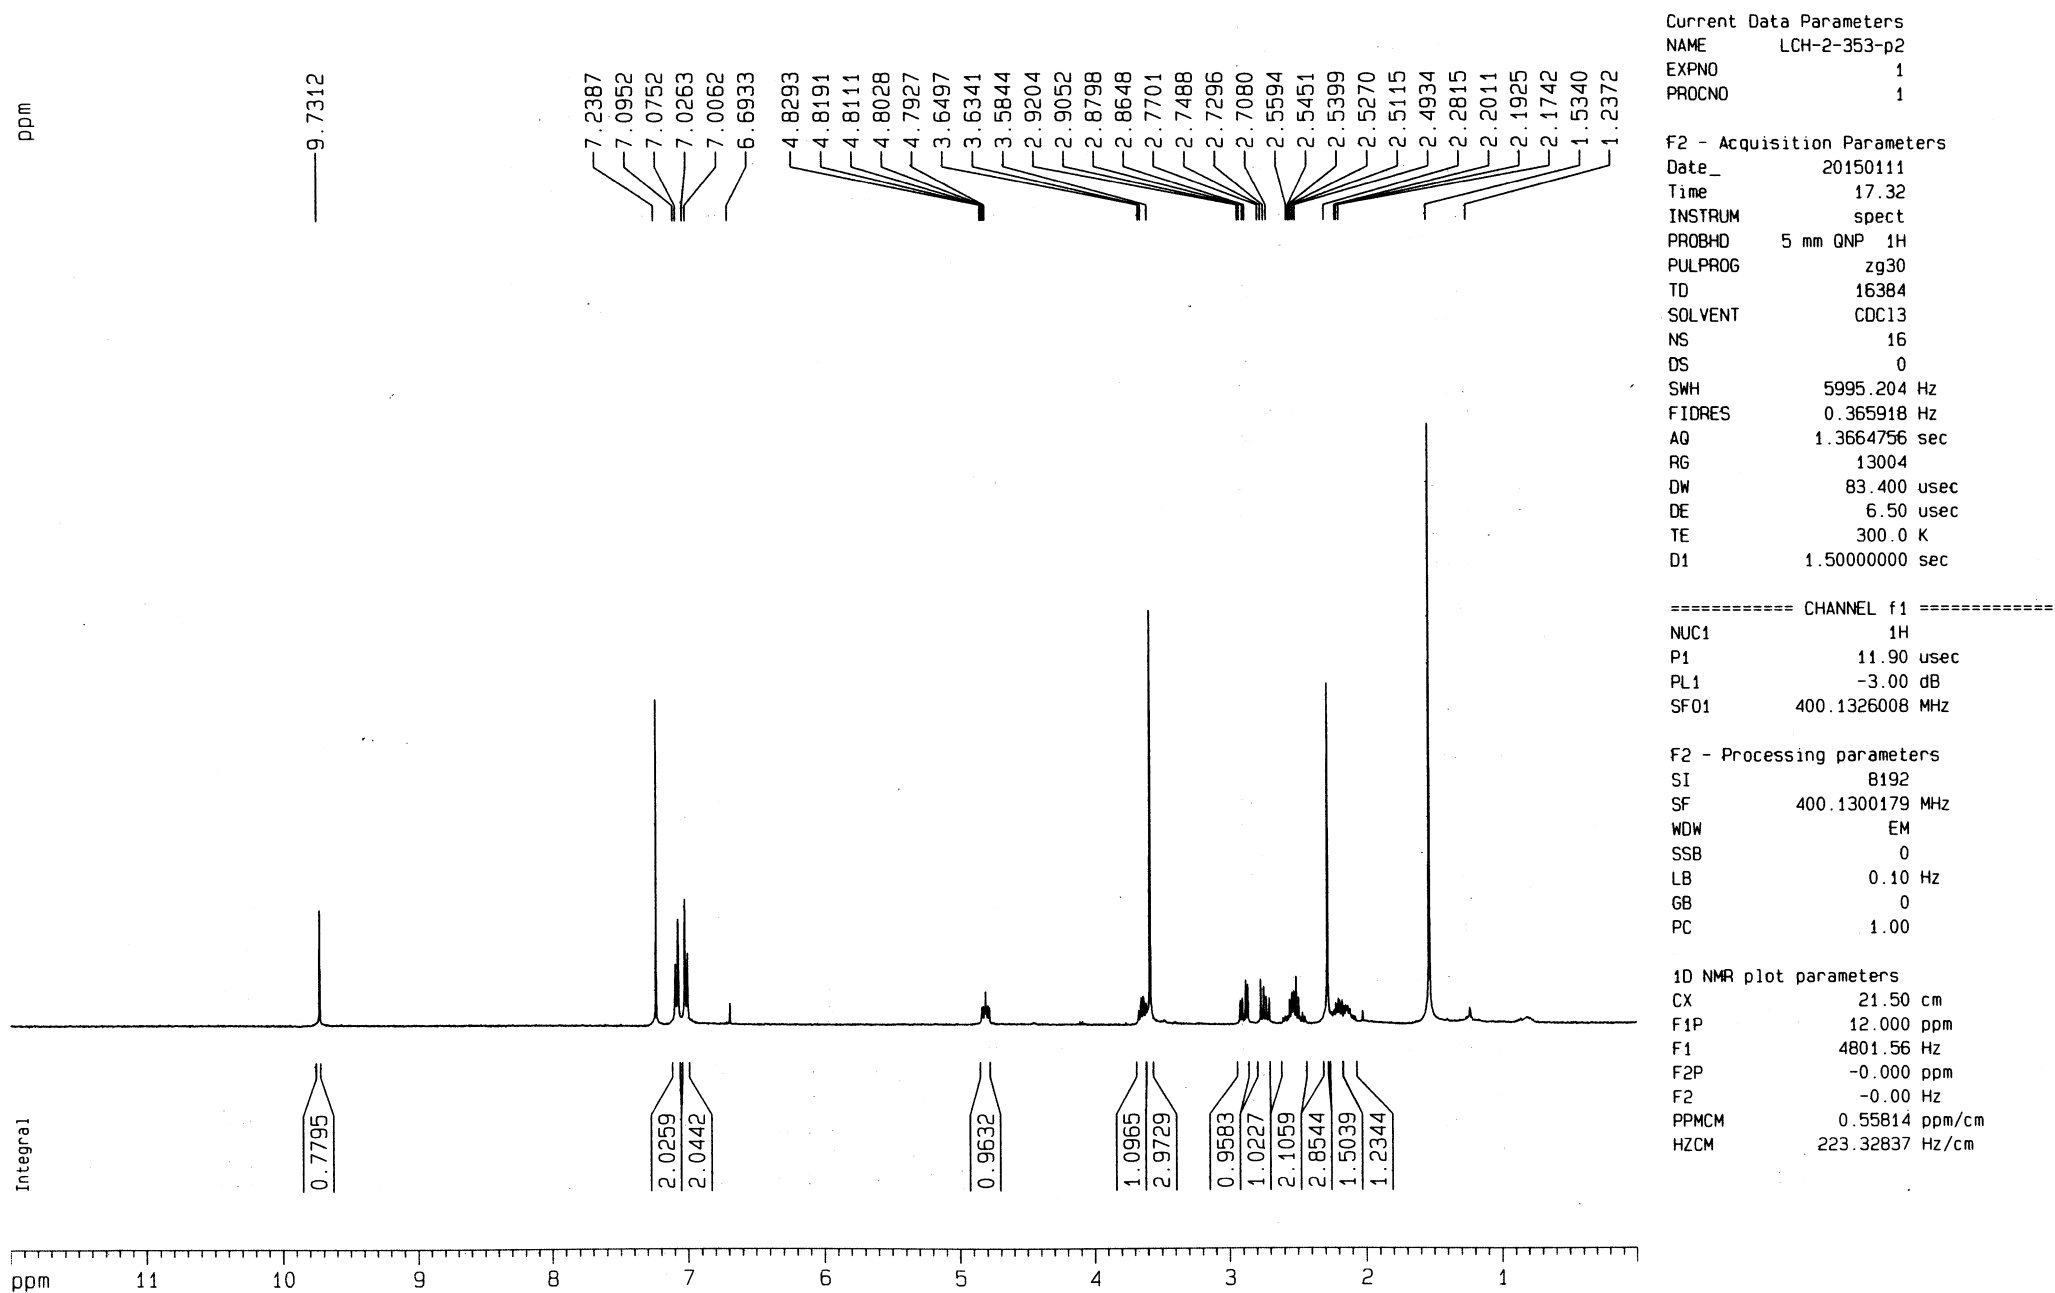

## C13 spectrum of

Fig S98. <sup>13</sup>C NMR (CDCl<sub>3</sub>, 100 MHz) of compound anti-3e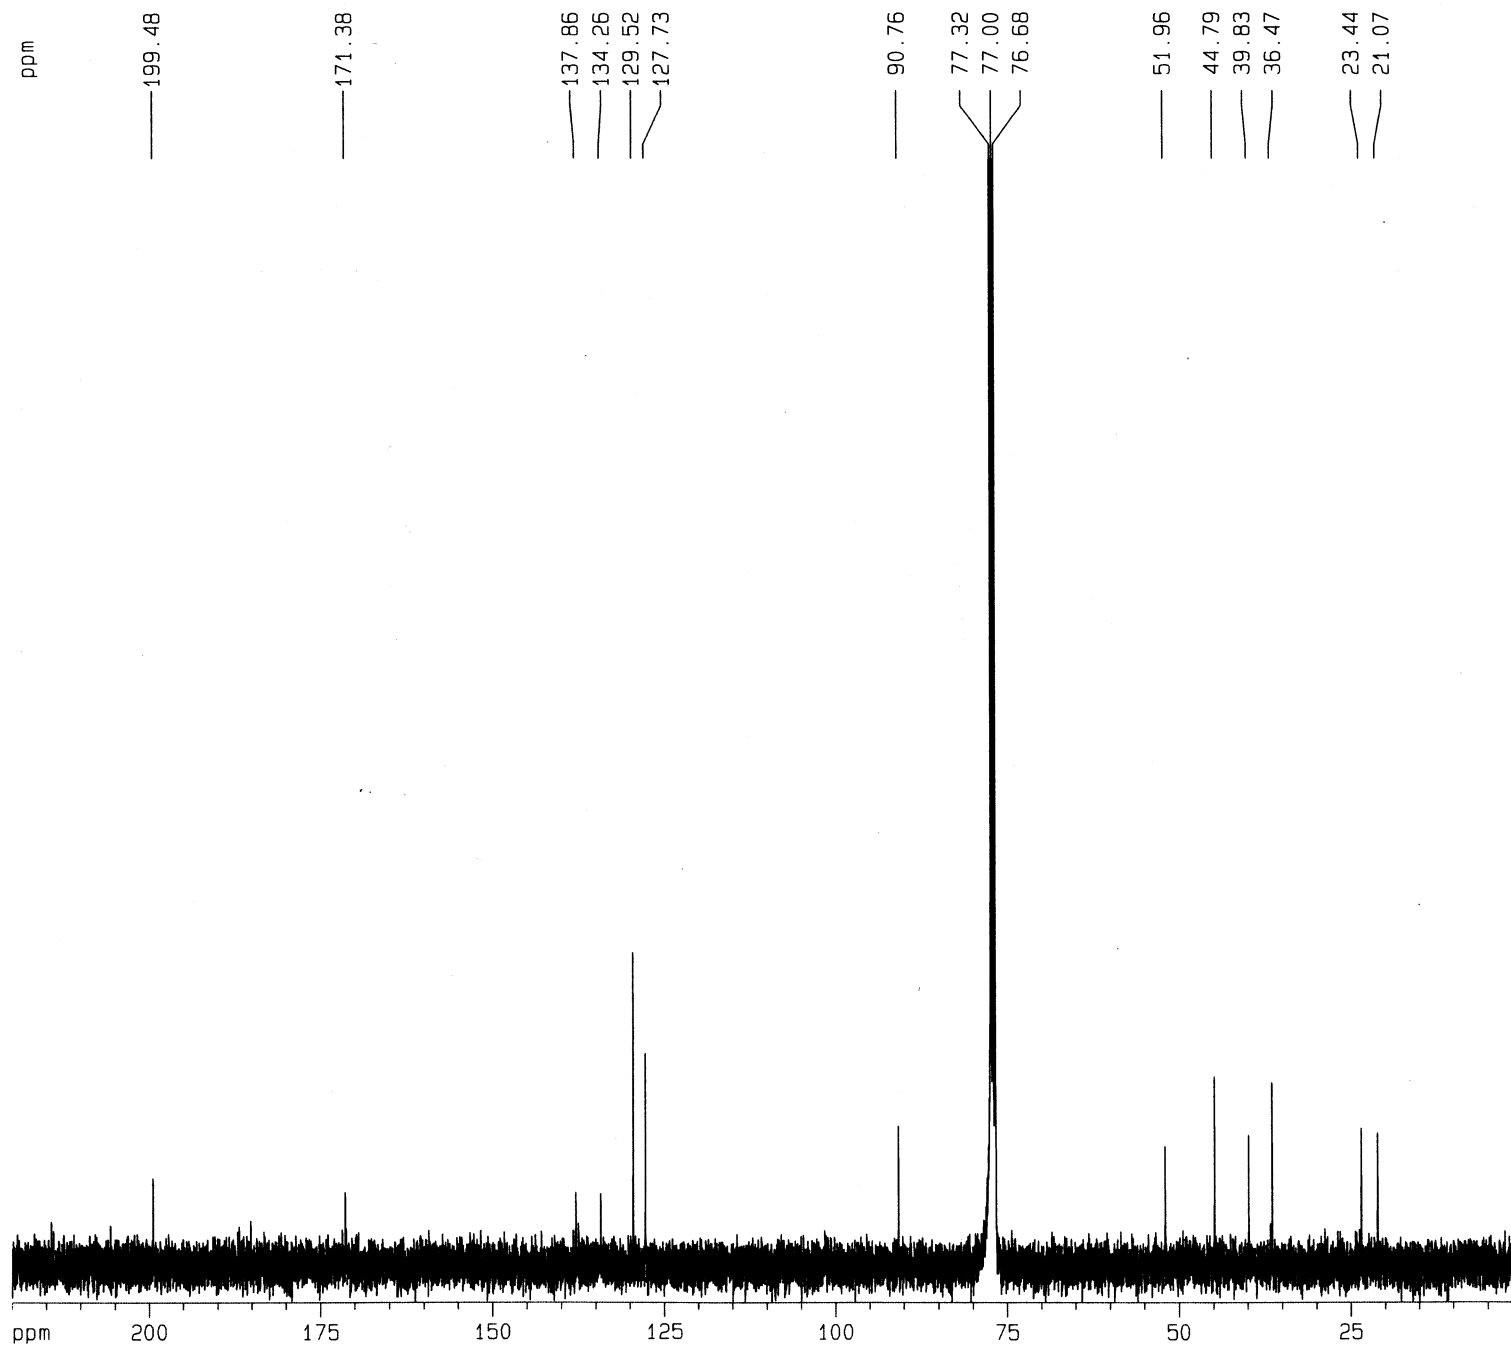

Current Data Parameters  
 NAME LCH-2-353-p2  
 EXPNO 3  
 PROCNO 1

F2 - Acquisition Parameters  
 Date\_ 20150115  
 Time 2.48  
 INSTRUM spect  
 PROBHD 5 mm QNP 1H  
 PULPROG zgpg30  
 TD 65536  
 SOLVENT CDCl3  
 NS 3686  
 DS 4  
 SWH 25125.629 Hz  
 FIDRES 0.383387 Hz  
 AQ 1.3042164 sec  
 RG 256  
 DW 19.900 usec  
 DE 6.50 usec  
 TE 300.0 K  
 D1 2.0000000 sec  
 d11 0.0300000 sec  
 d12 0.0000200 sec

===== CHANNEL f1 =====  
 NUC1 13C  
 P1 10.20 usec  
 PL1 0.00 dB  
 SF01 100.6237959 MHz

===== CHANNEL f2 =====  
 CPDPRG2 waltz16  
 NUC2 1H  
 PCPD2 90.00 usec  
 PL2 -3.00 dB  
 PL12 14.50 dB  
 PL13 17.50 dB  
 SF02 400.1326008 MHz

F2 - Processing parameters  
 SI 32768  
 SF 100.6127708 MHz  
 WDW EM  
 SSB 0  
 LB 0.30 Hz  
 GB 0  
 PC 1.40

1D NMR plot parameters  
 CX 20.00 cm  
 F1P 220.000 ppm  
 F1 22134.81 Hz  
 F2P 0.000 ppm  
 F2 0.00 Hz  
 PPMCM 11.00000 ppm/cm  
 HZCM 1106.74048 Hz/cm

Fig S99. DEPT of compound anti-3e

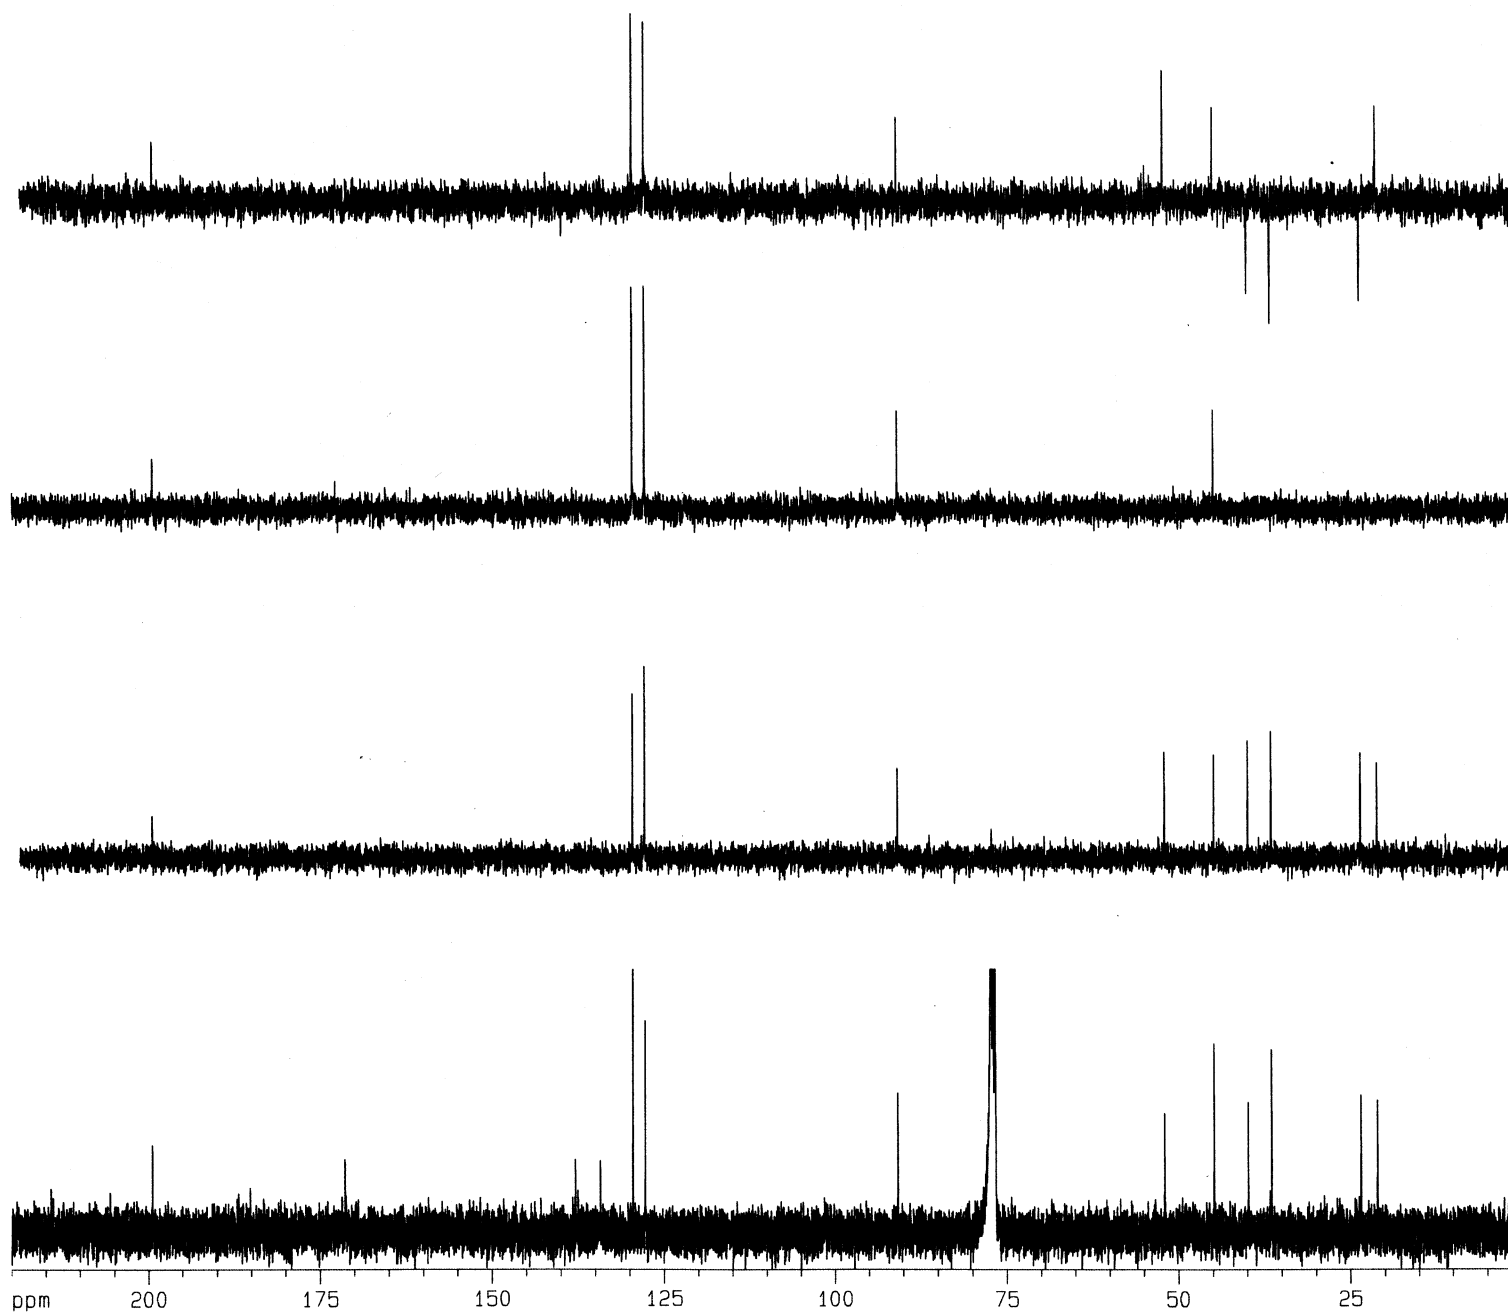

Current Data Parameters  
 NAME LCH-2-353-p2  
 EXPNO 3  
 PROCNO 1

F2 - Acquisition Parameters  
 Date\_ 20150115  
 Time 2.48  
 INSTRUM spect  
 PROBHD 5 mm QNP 1H  
 PULPROG zgpg30  
 TD 65536  
 SOLVENT CDCl3  
 NS 3686  
 DS 4  
 SWH 25125.629 Hz  
 FIDRES 0.383387 Hz  
 AQ 1.3042164 sec  
 RG 256  
 DW 19.900 usec  
 DE 6.50 usec  
 TE 300.0 K  
 D1 2.0000000 sec  
 d11 0.0300000 sec  
 d12 0.0000200 sec

===== CHANNEL f1 =====  
 NUC1 13C  
 P1 10.20 usec  
 PL1 0.00 dB  
 SF01 100.6237959 MHz

===== CHANNEL f2 =====  
 CPDPRG2 waltz16  
 NUC2 1H  
 PCPD2 90.00 usec  
 PL2 -3.00 dB  
 PL12 14.50 dB  
 PL13 17.50 dB  
 SF02 400.1326008 MHz

F2 - Processing parameters  
 SI 32768  
 SF 100.6127708 MHz  
 WDW EM  
 SSB 0  
 LB 0.30 Hz  
 GB 0  
 PC 1.40

1D NMR plot parameters  
 CX 20.00 cm  
 F1P 220.000 ppm  
 F1 22134.81 Hz  
 F2P 0.000 ppm  
 F2 0.00 Hz  
 PPMCM 11.00000 ppm/cm  
 HZCM 1106.74048 Hz/cm

Sample Name **LCH-02-393-11**  
Date collected **2015-04-16**Pulse sequence **s2pul**  
Solvent **Acetone**Temperature **50**  
Spectrometer **-**Study owner **vnmr2**  
Operator **vnmr2**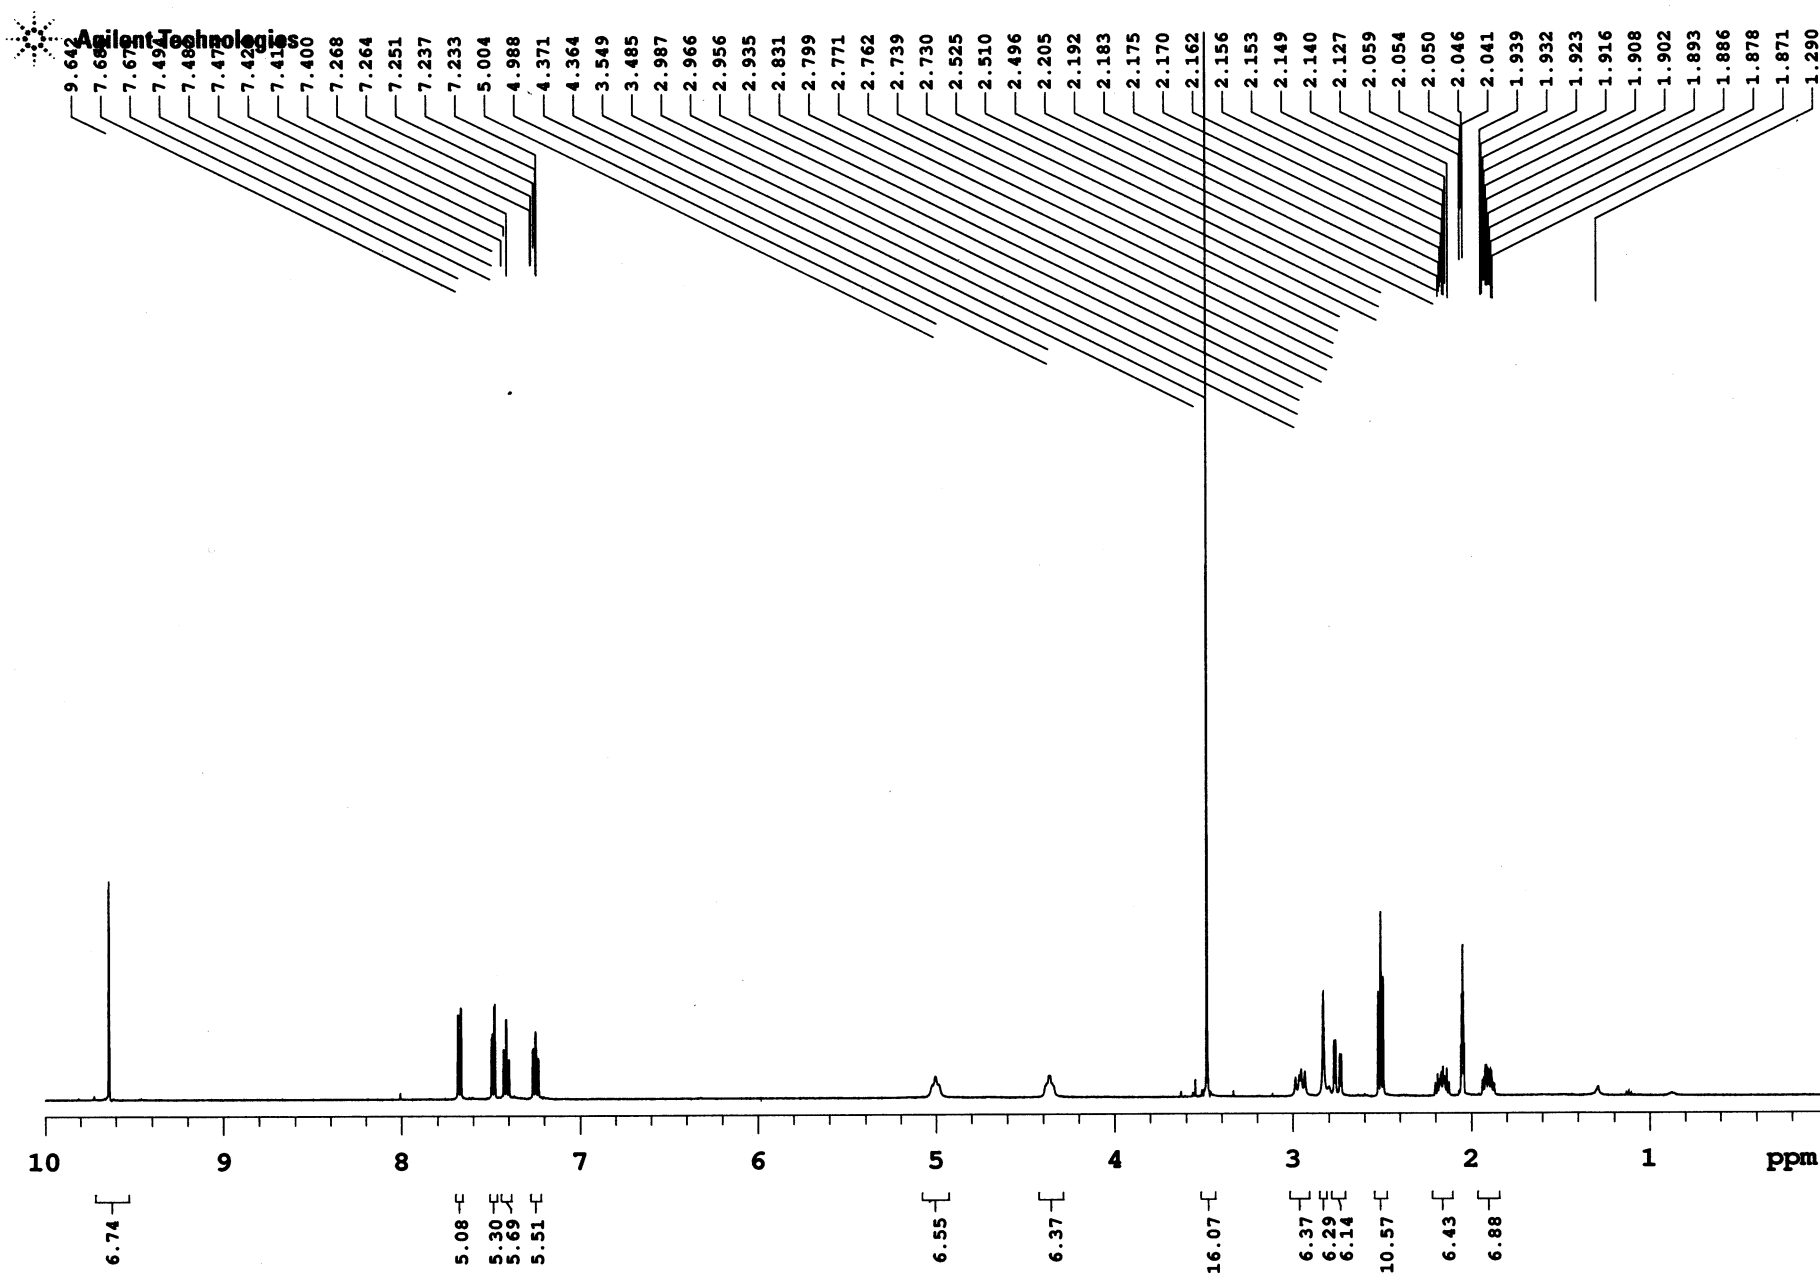



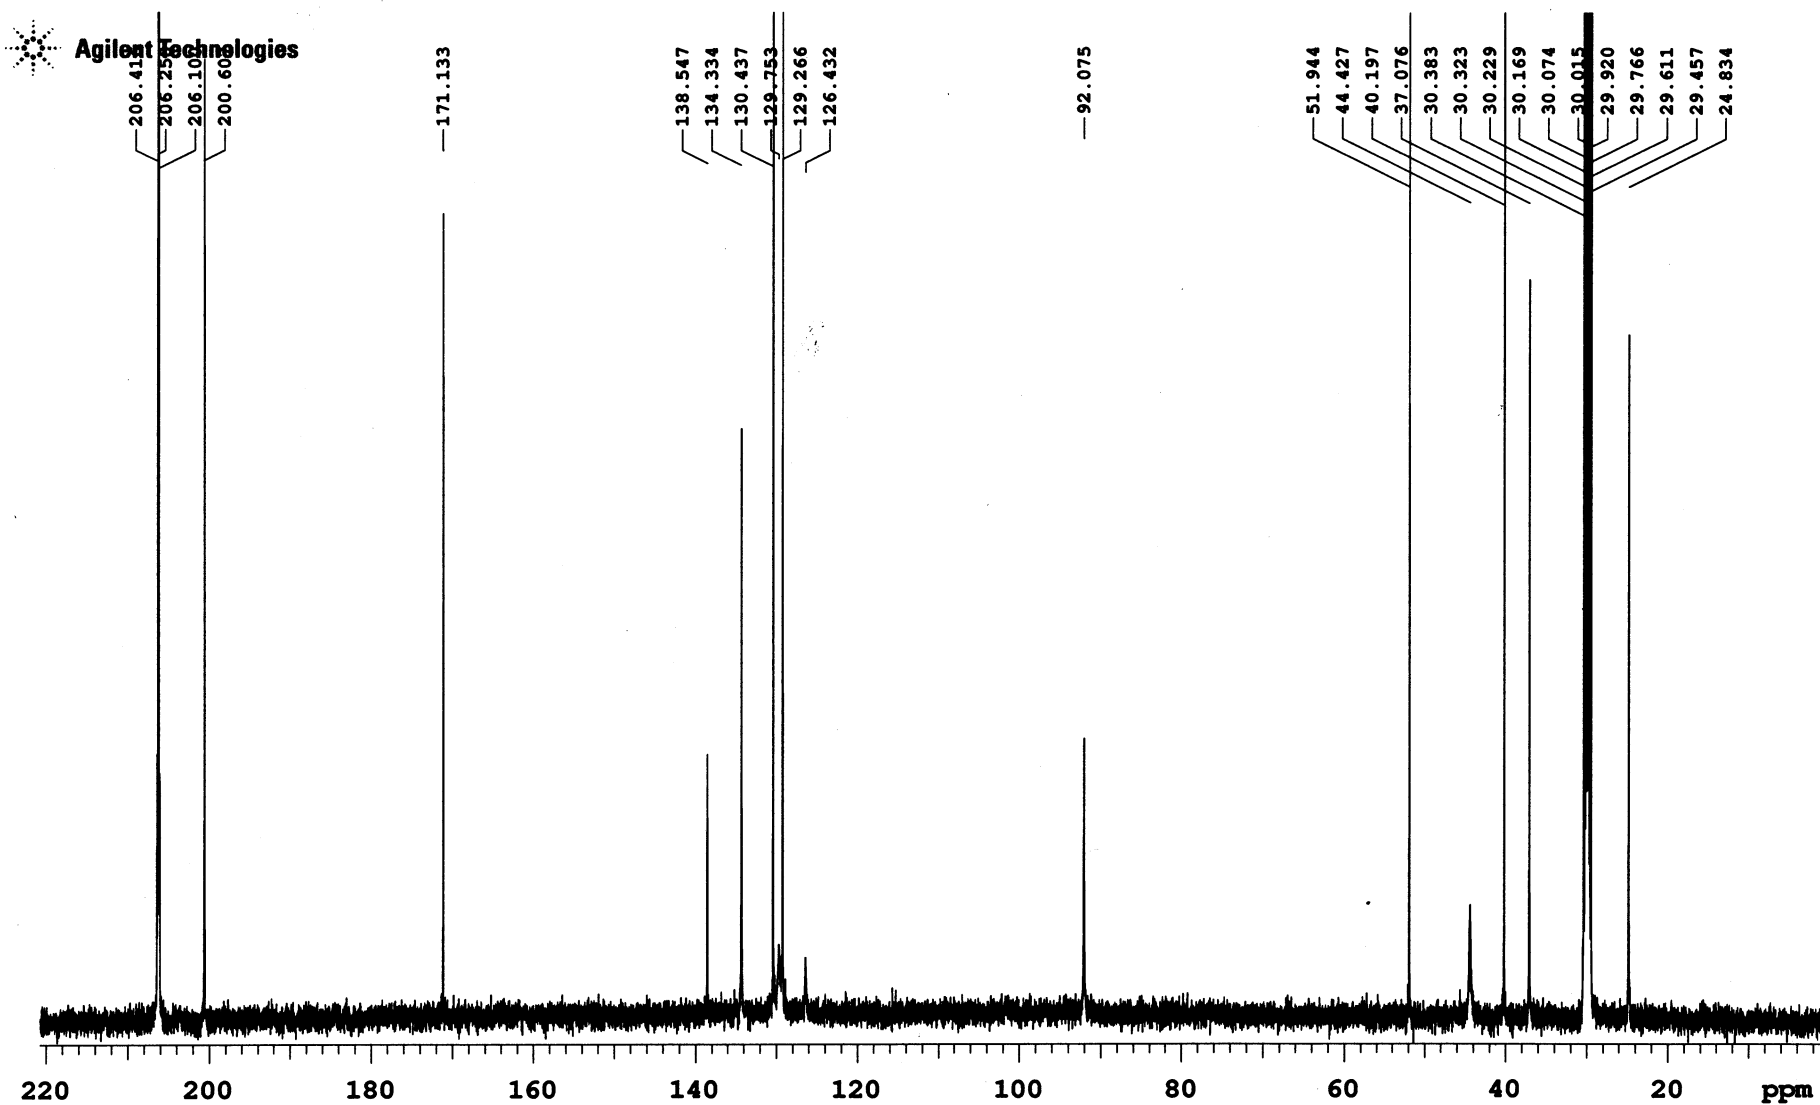Fig S101.  $^{13}\text{C}$  NMR (acetone- $d_6$  125 MHz) of compound syn-3f

Sample Name **LCH-02-393-f1**  
Date collected **2015-04-17**Pulse sequence **DEPT**  
Solvent **Acetone**Temperature **50**  
Spectrometer **—**Study owner **vnmr2**  
Operator **vnmr2**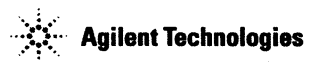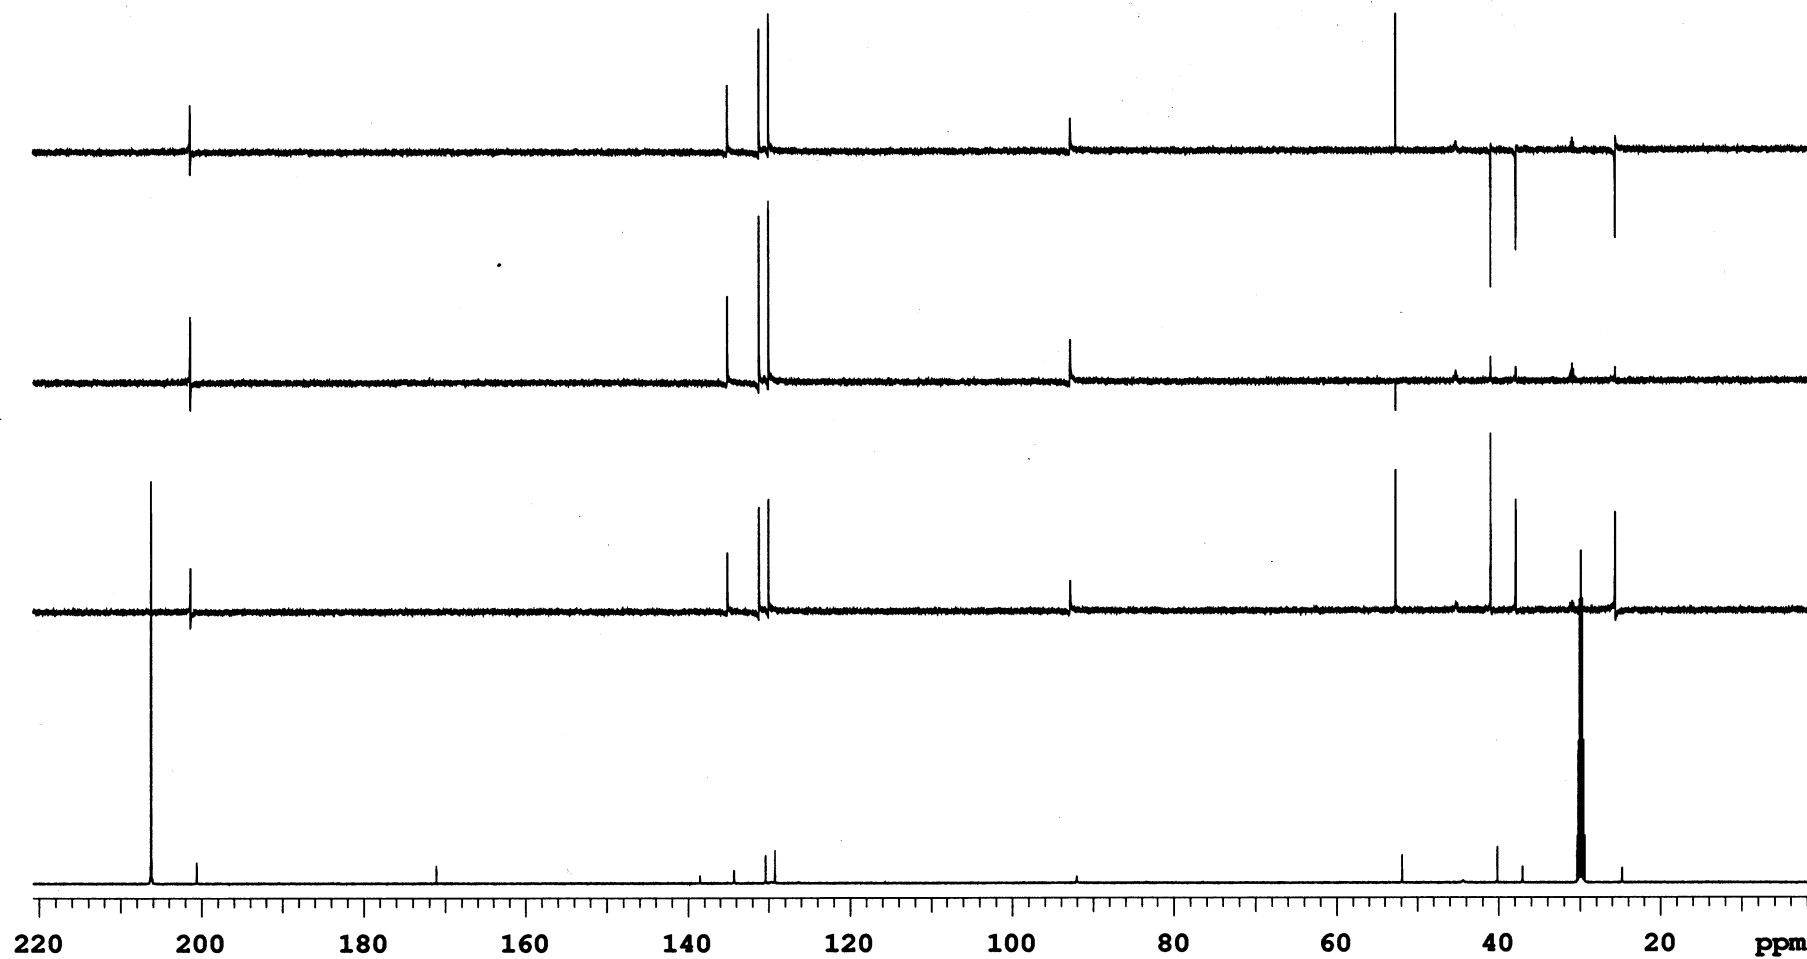

Fig S102. DEPT of compound syn-3f

Sample Name LCH-02-393-p2  
Date collected 2015-04-20Pulse sequence s2pul  
Solvent AcetoneTemperature 50  
Spectrometer -Study owner vnmr2  
Operator vnmr2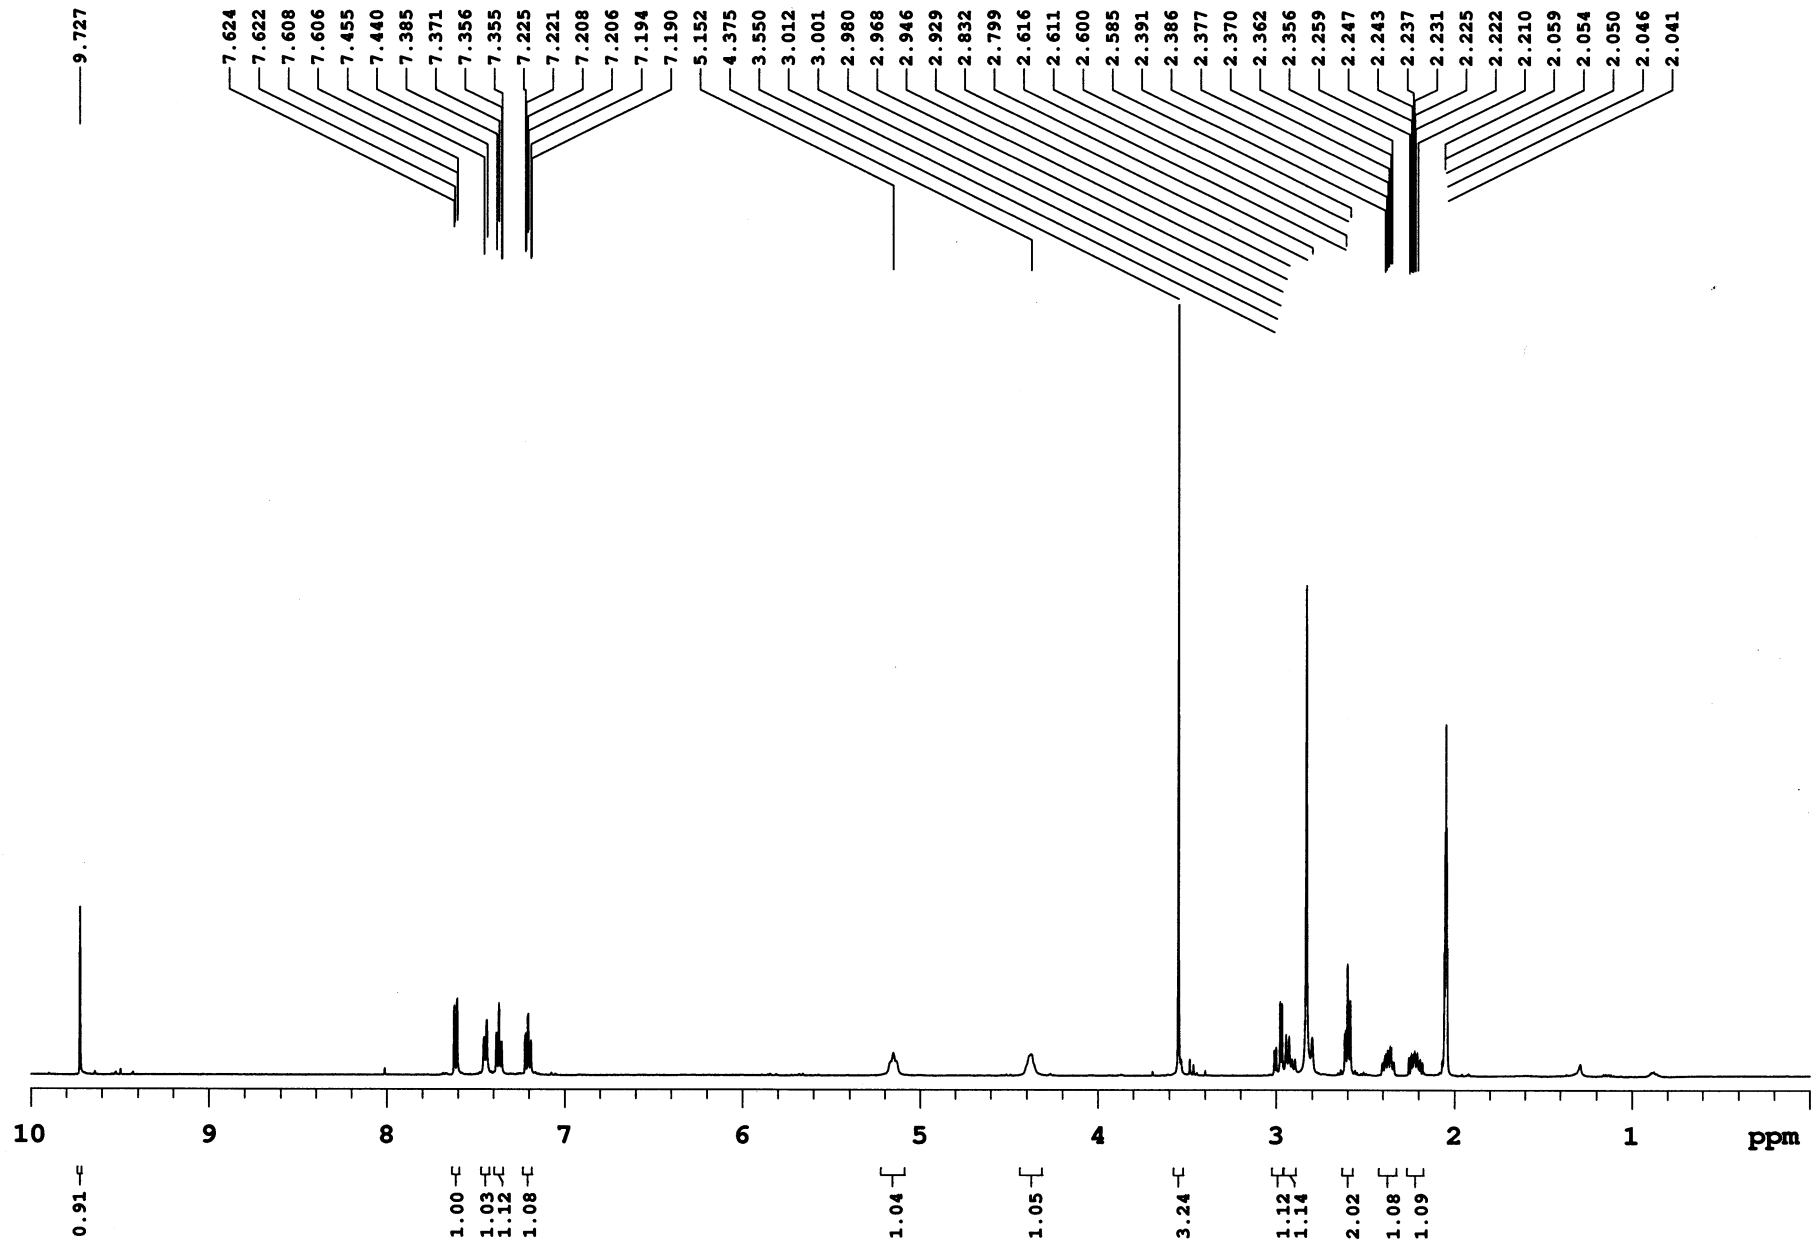

Sample Name **LCH-02-393-f2**  
Date collected **2015-04-20**

Pulse sequence **s2pul**  
Solvent **Acetone**

Temperature **50**  
Spectrometer **-**

Study owner **vnmr2**  
Operator **vnmr2**

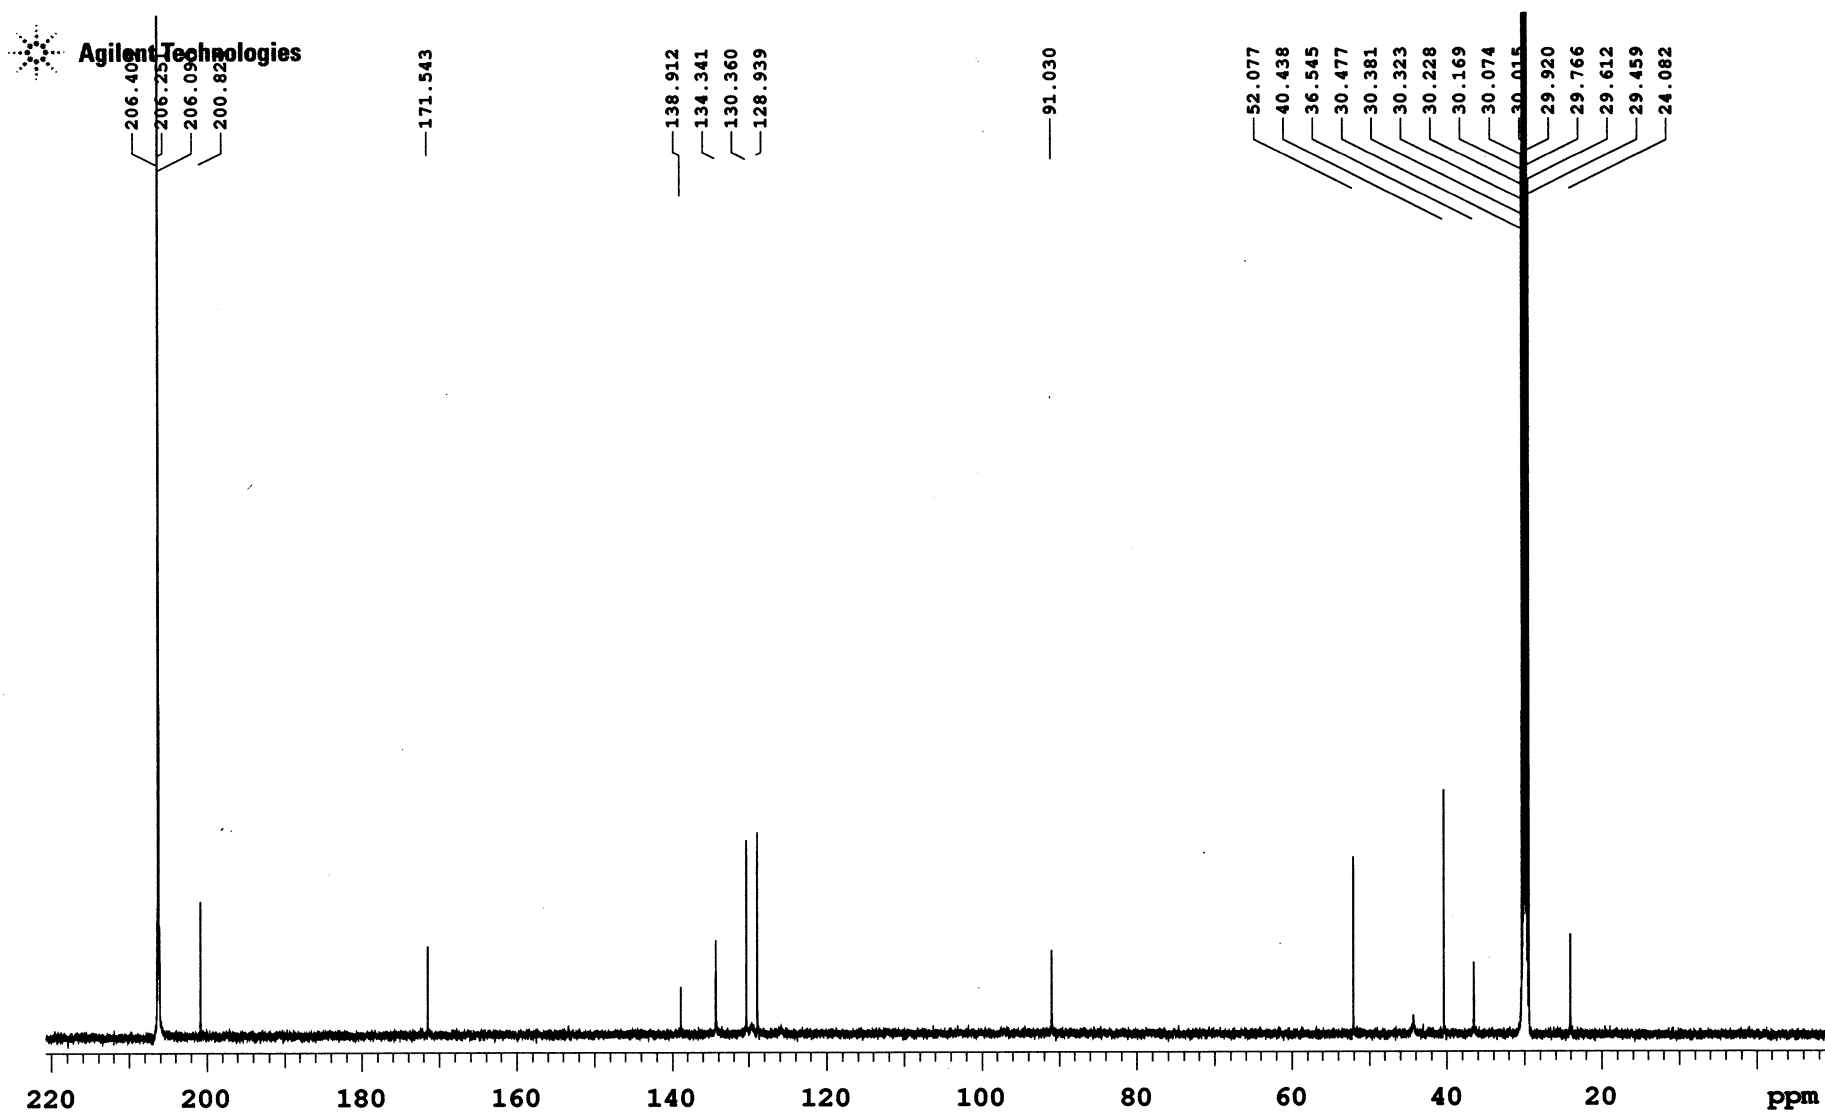

Fig S104.  $^{13}\text{C}$  NMR (acetone- $d_6$ , 125 MHz) of compound anti-3f

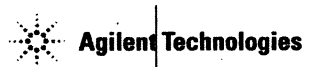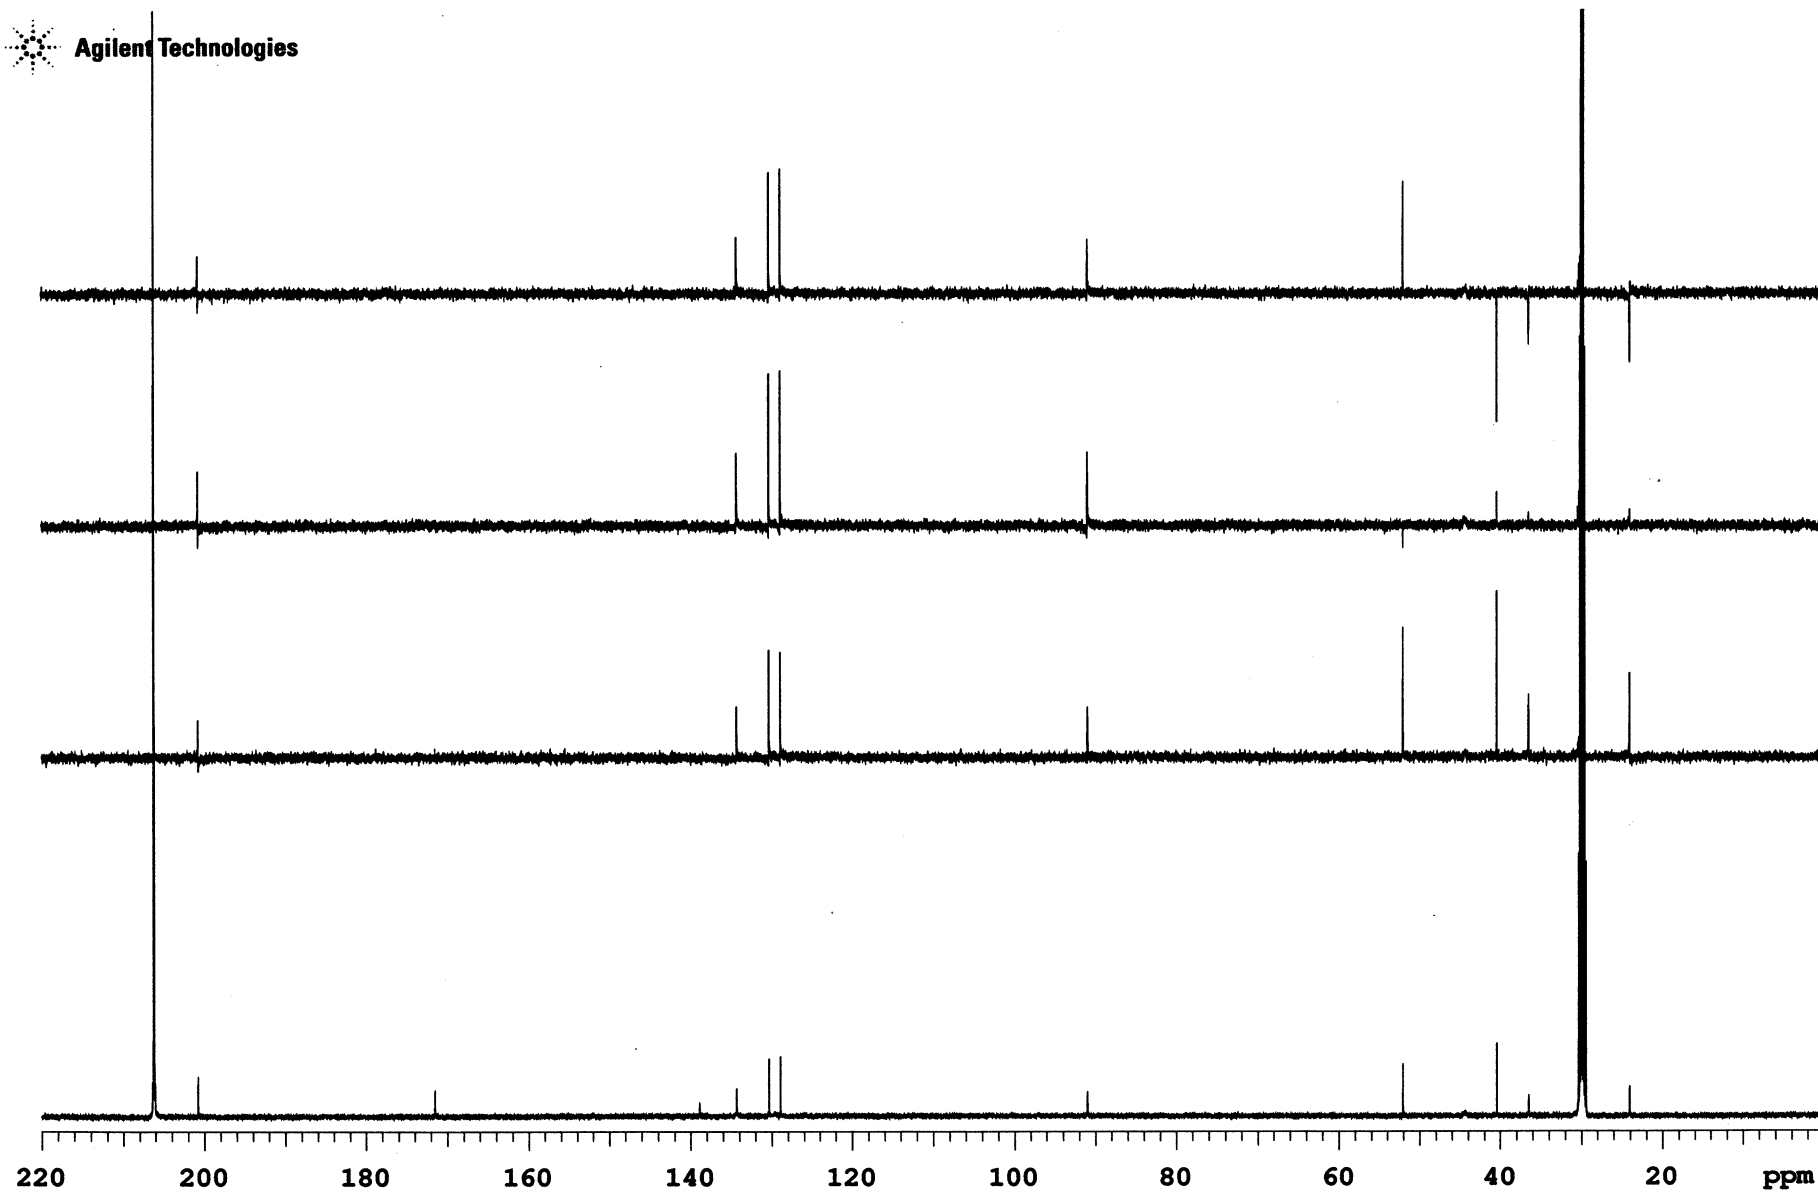

Fig S105. DEPT of compound anti-3f

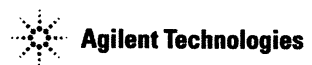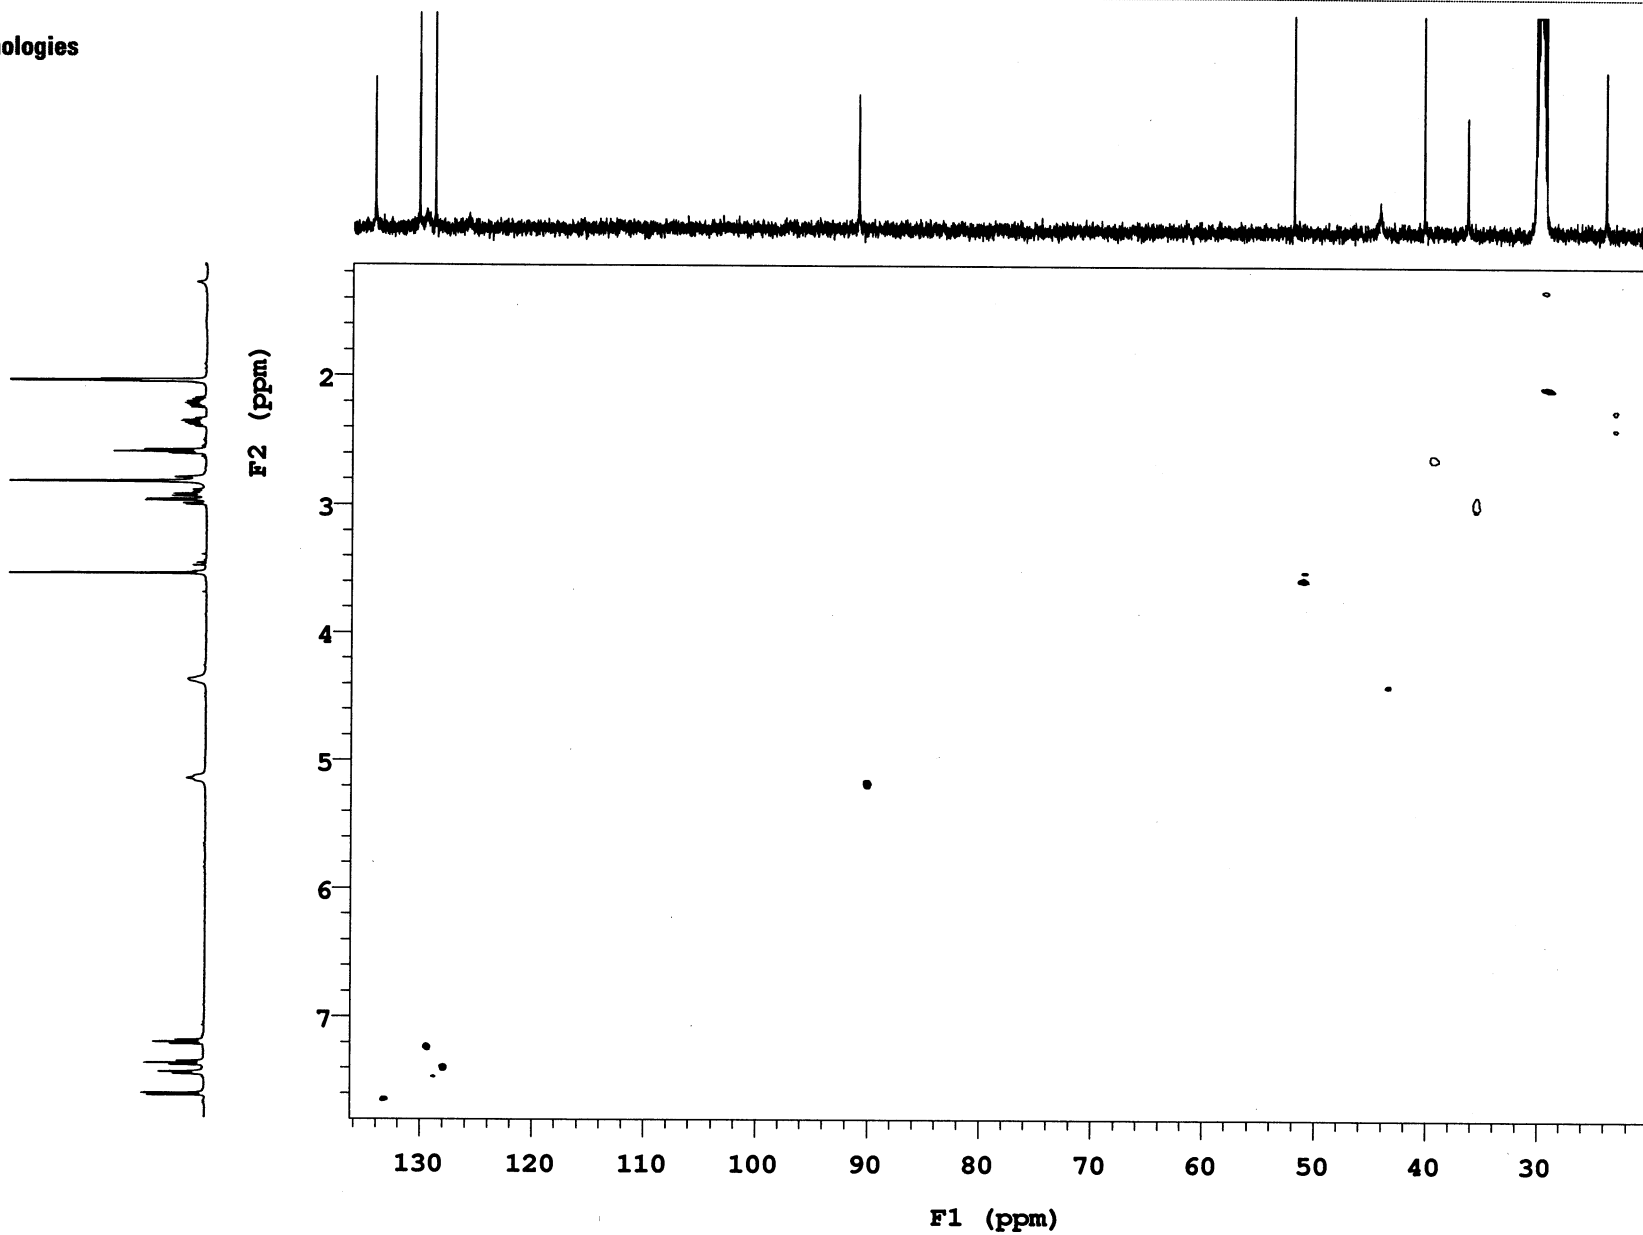

Fig S106. HSQC of compound anti-3f

Fig S107. <sup>1</sup>H NMR (CDCl<sub>3</sub>, 400 MHz) of compound syn-3g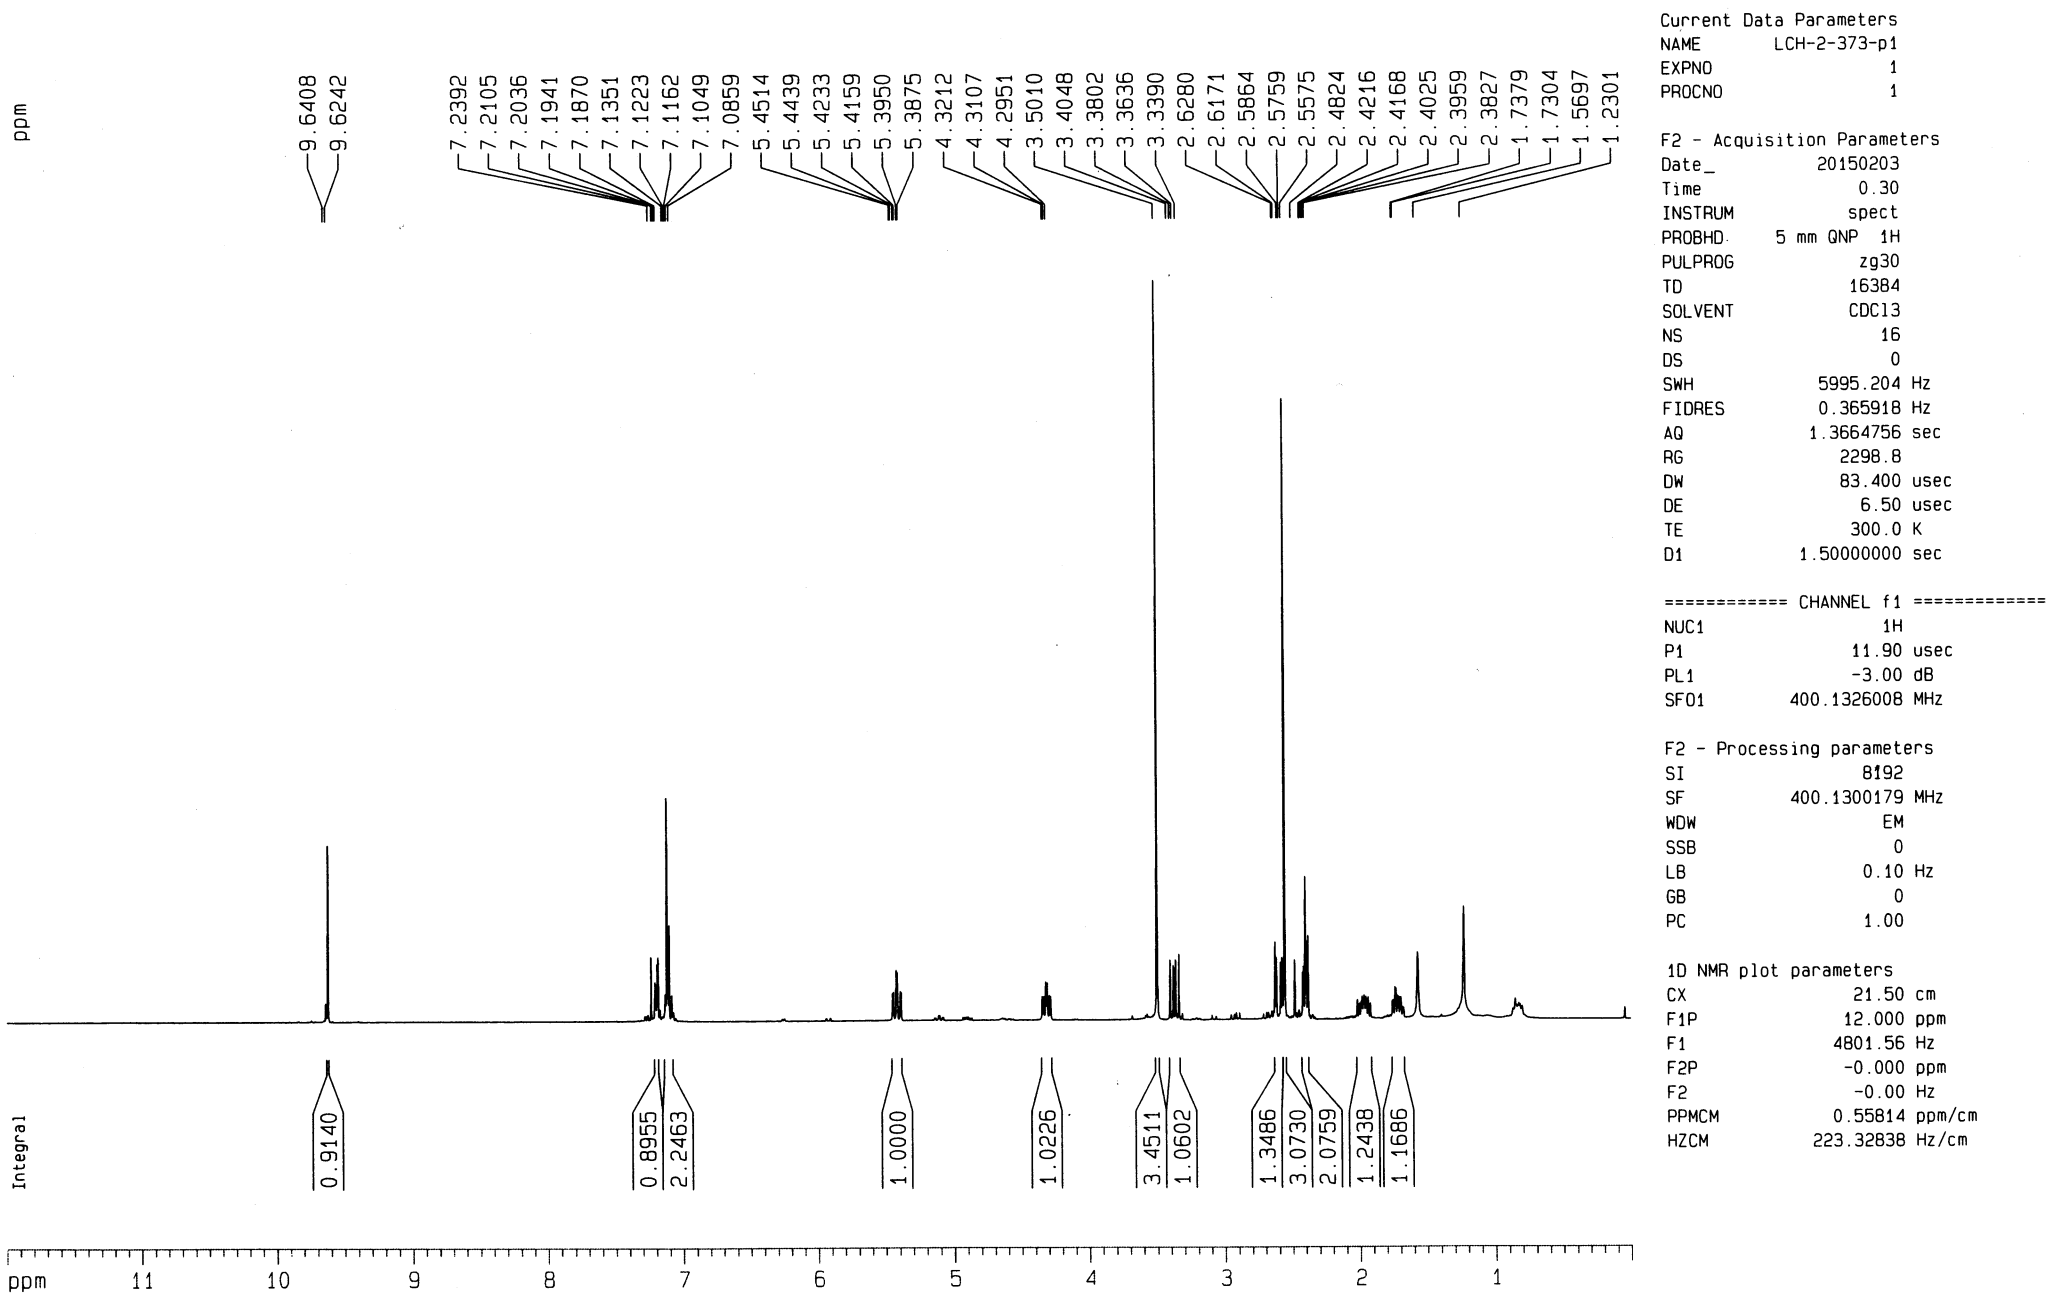

## C13 spectrum of

Fig S108. 13C NMR (CDCl3, 100 MHz) of compound syn-3g

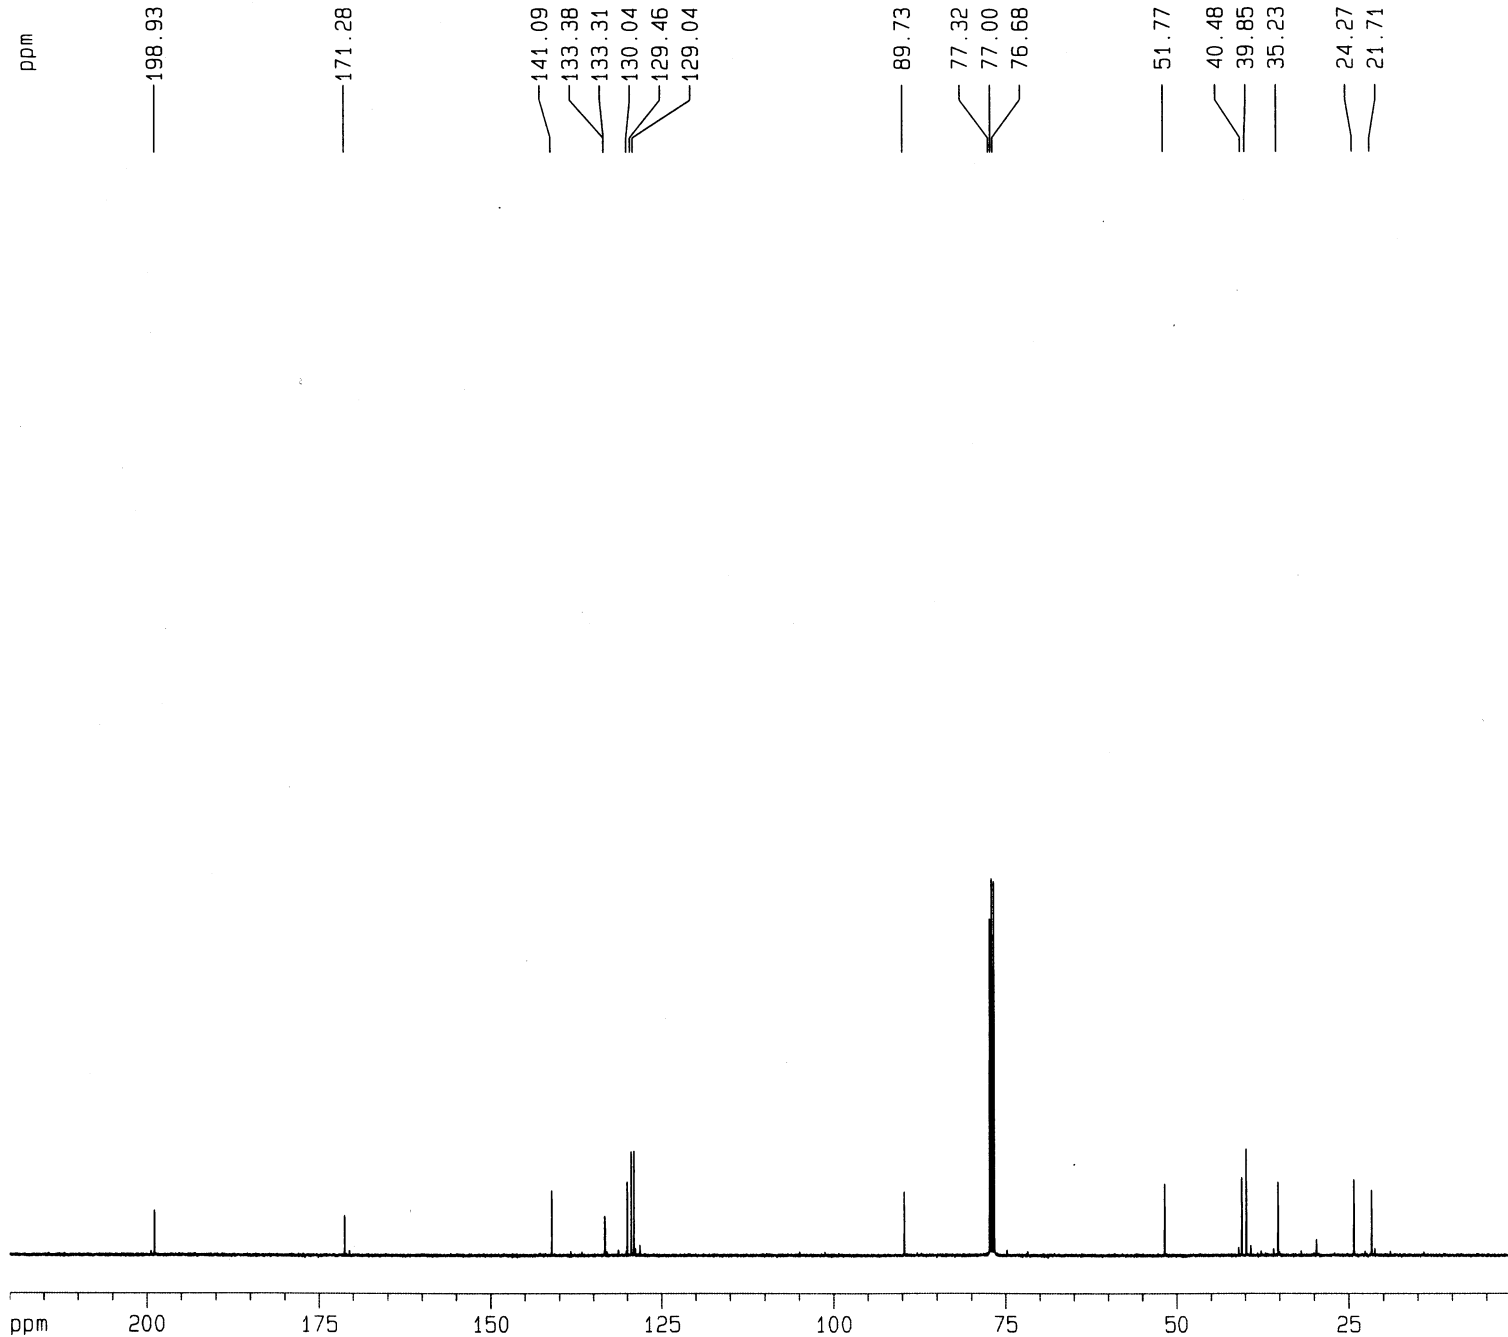

Current Data Parameters  
 NAME LCH-2-373-p1  
 EXPNO 2  
 PROCNO 1

F2 - Acquisition Parameters  
 Date\_ 20150203  
 Time 3.55  
 INSTRUM spect  
 PROBHD 5 mm QNP 1H  
 PULPROG zgpg30  
 TD 65536  
 SOLVENT CDC13  
 NS 3686  
 DS 4  
 SWH 25125.629 Hz  
 FIDRES 0.383387 Hz  
 AQ 1.3042164 sec  
 RG 256  
 DW 19.900 usec  
 DE 6.50 usec  
 TE 300.0 K  
 D1 2.0000000 sec  
 d11 0.03000000 sec  
 d12 0.00002000 sec

===== CHANNEL f1 =====  
 NUC1 13C  
 P1 10.20 usec  
 PL1 0.00 dB  
 SF01 100.6237959 MHz

===== CHANNEL f2 =====  
 CPDPRG2 waltz16  
 NUC2 1H  
 PCPD2 90.00 usec  
 PL2 -3.00 dB  
 PL12 14.50 dB  
 PL13 17.50 dB  
 SF02 400.1326008 MHz

F2 - Processing parameters  
 SI 32768  
 SF 100.6127723 MHz  
 WDW EM  
 SSB 0  
 LB 0.30 Hz  
 GB 0  
 PC 1.40

1D NMR plot parameters  
 CX 20.00 cm  
 F1P 220.000 ppm  
 F1 22134.81 Hz  
 F2P 0.000 ppm  
 F2 0.00 Hz  
 PPMCM 11.00000 ppm/cm  
 HZCM 1106.74048 Hz/cm





Fig S110. 1H NMR (CDCl3, 400 MHz) of compound anti-3g

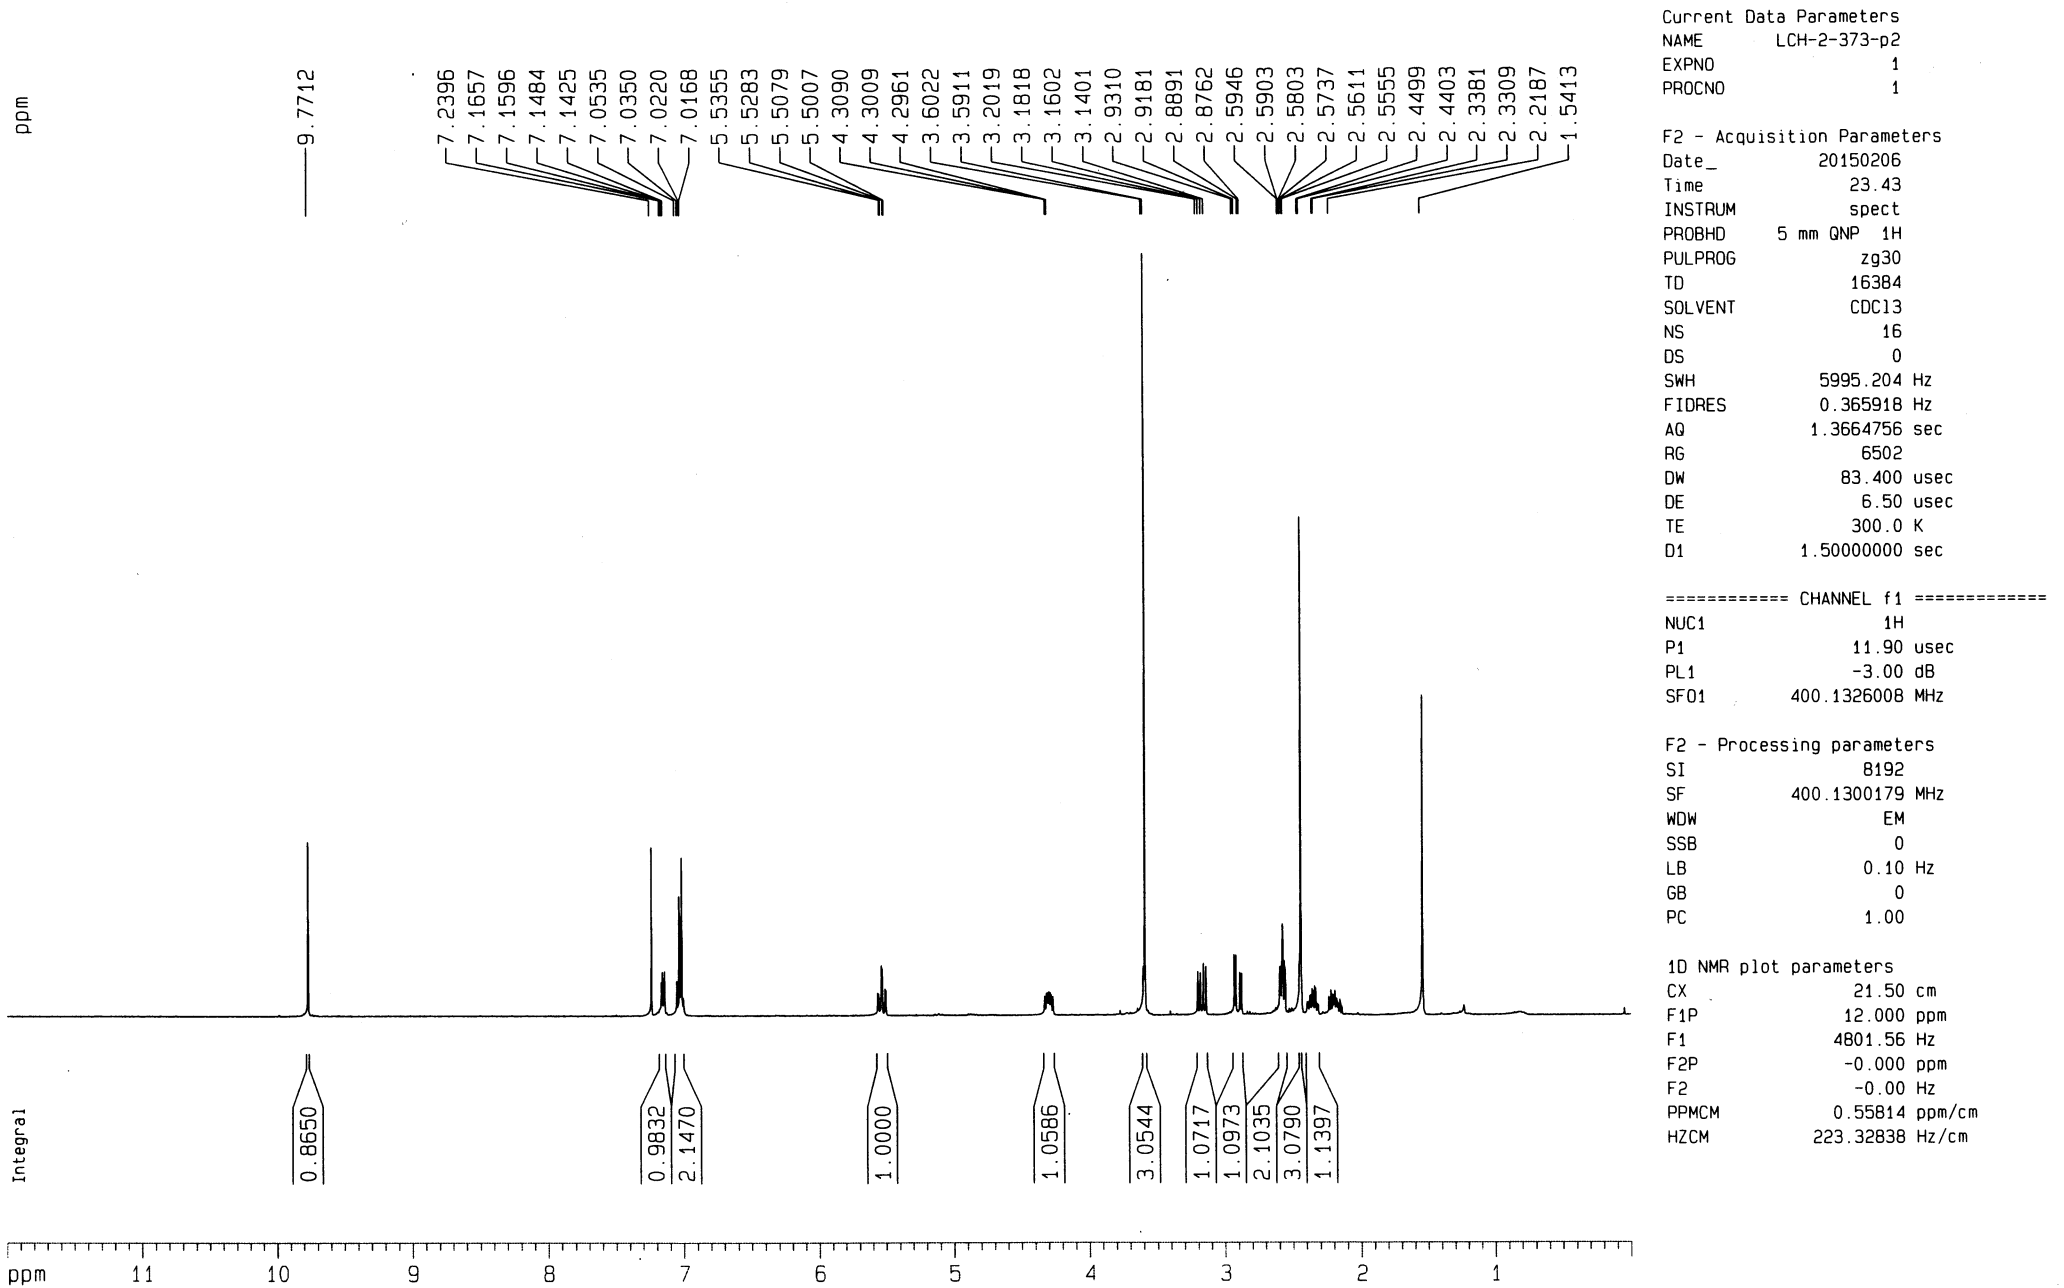

## C13 spectrum of

Fig S111. 13C NMR (CDCl3, 100 MHz) of compound anti-3g

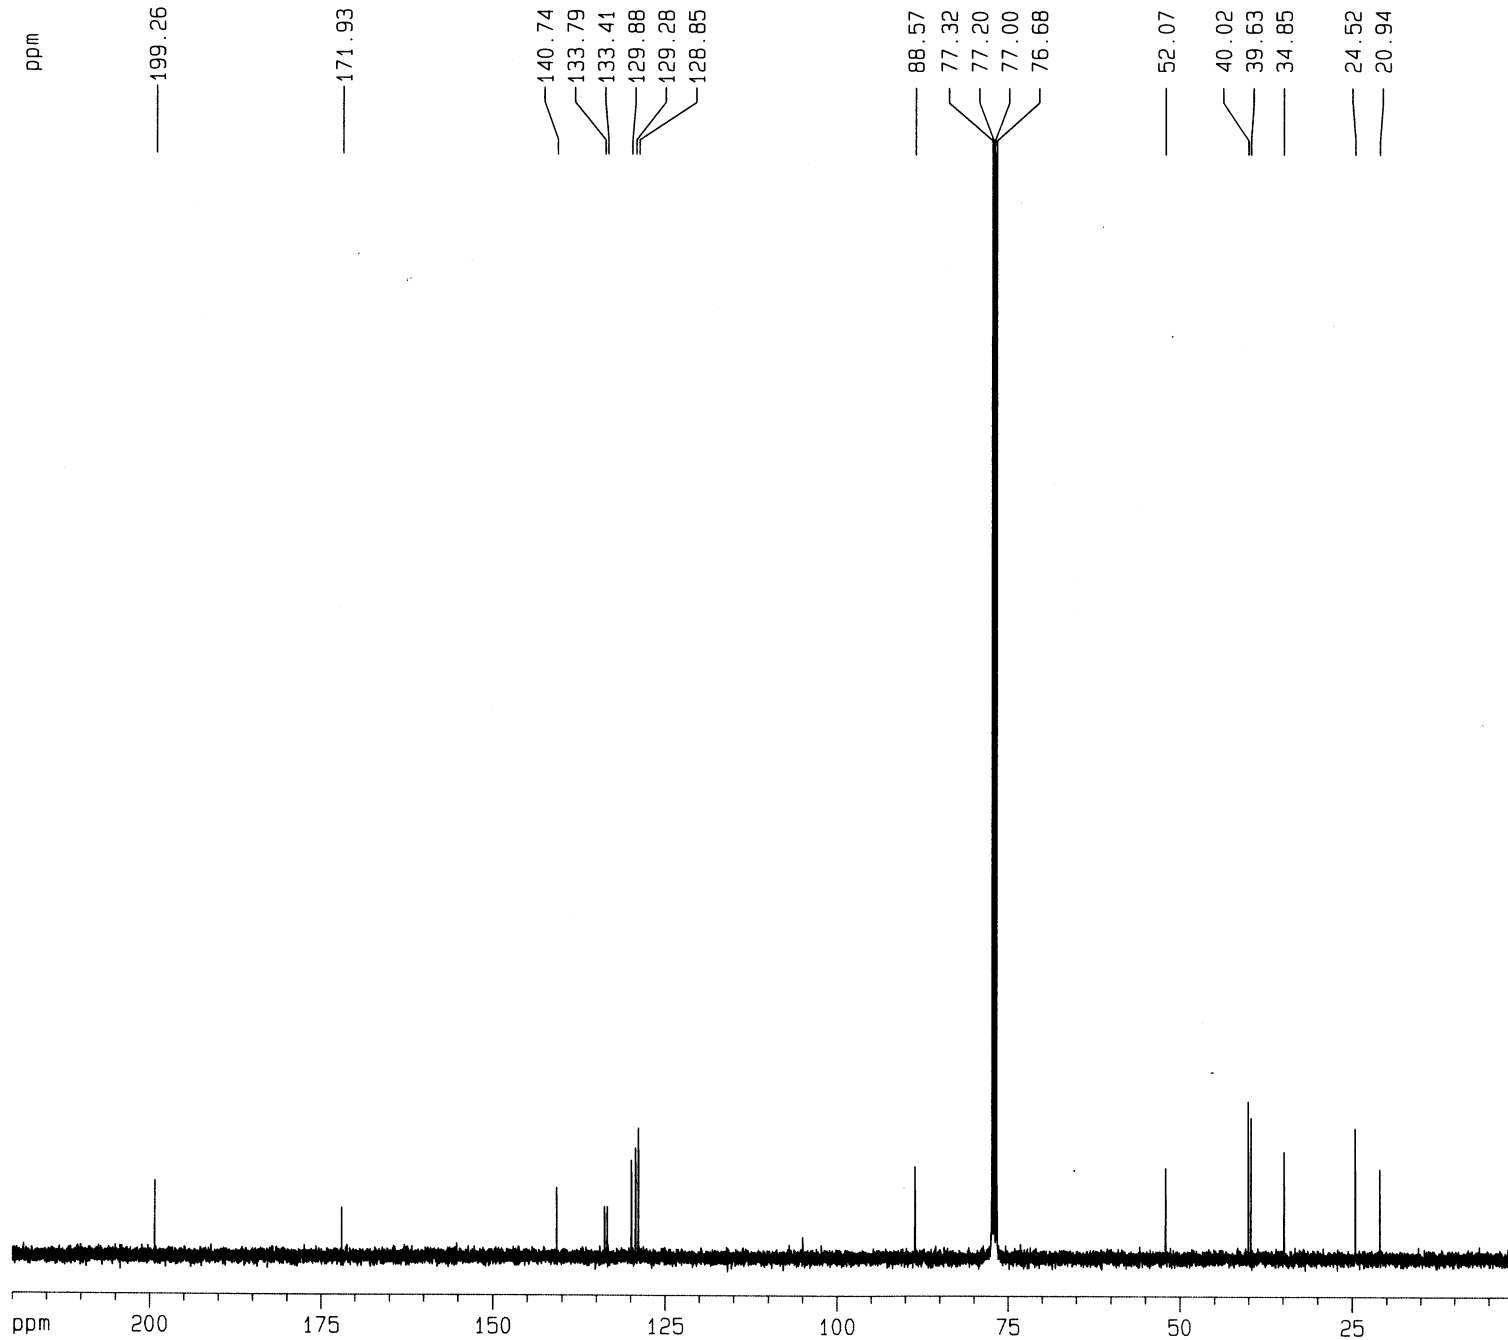

Current Data Parameters  
 NAME LCH-2-373-p2  
 EXPNO 2  
 PROCNO 1

F2 - Acquisition Parameters  
 Date\_ 20150207  
 Time 3.07  
 INSTRUM spect  
 PROBHD 5 mm GNP 1H  
 PULPROG zgpg30  
 TD 65536  
 SOLVENT CDCl3  
 NS 3686  
 DS 4  
 SWH 25125.629 Hz  
 FIDRES 0.383387 Hz  
 AQ 1.3042164 sec  
 RG 256  
 DW 19.900 usec  
 DE 6.50 usec  
 TE 300.0 K  
 D1 2.00000000 sec  
 d11 0.03000000 sec  
 d12 0.00002000 sec

===== CHANNEL f1 =====  
 NUC1 13C  
 P1 10.20 usec  
 PL1 0.00 dB  
 SF01 100.6237959 MHz

===== CHANNEL f2 =====  
 CPDPRG2 waltz16  
 NUC2 1H  
 PCPD2 90.00 usec  
 PL2 -3.00 dB  
 PL12 14.50 dB  
 PL13 17.50 dB  
 SF02 400.1326008 MHz

F2 - Processing parameters  
 SI 32768  
 SF 100.6127708 MHz  
 WDW EM  
 SSB 0  
 LB 0.30 Hz  
 GB 0  
 PC 1.40

1D NMR plot parameters  
 CX 20.00 cm  
 F1P 220.000 ppm  
 F1 22134.81 Hz  
 F2P 0.000 ppm  
 F2 0.00 Hz  
 PPMCM 11.00000 ppm/cm  
 HZCM 1106.74048 Hz/cm

Fig S112. DEPT of compound anti-3g

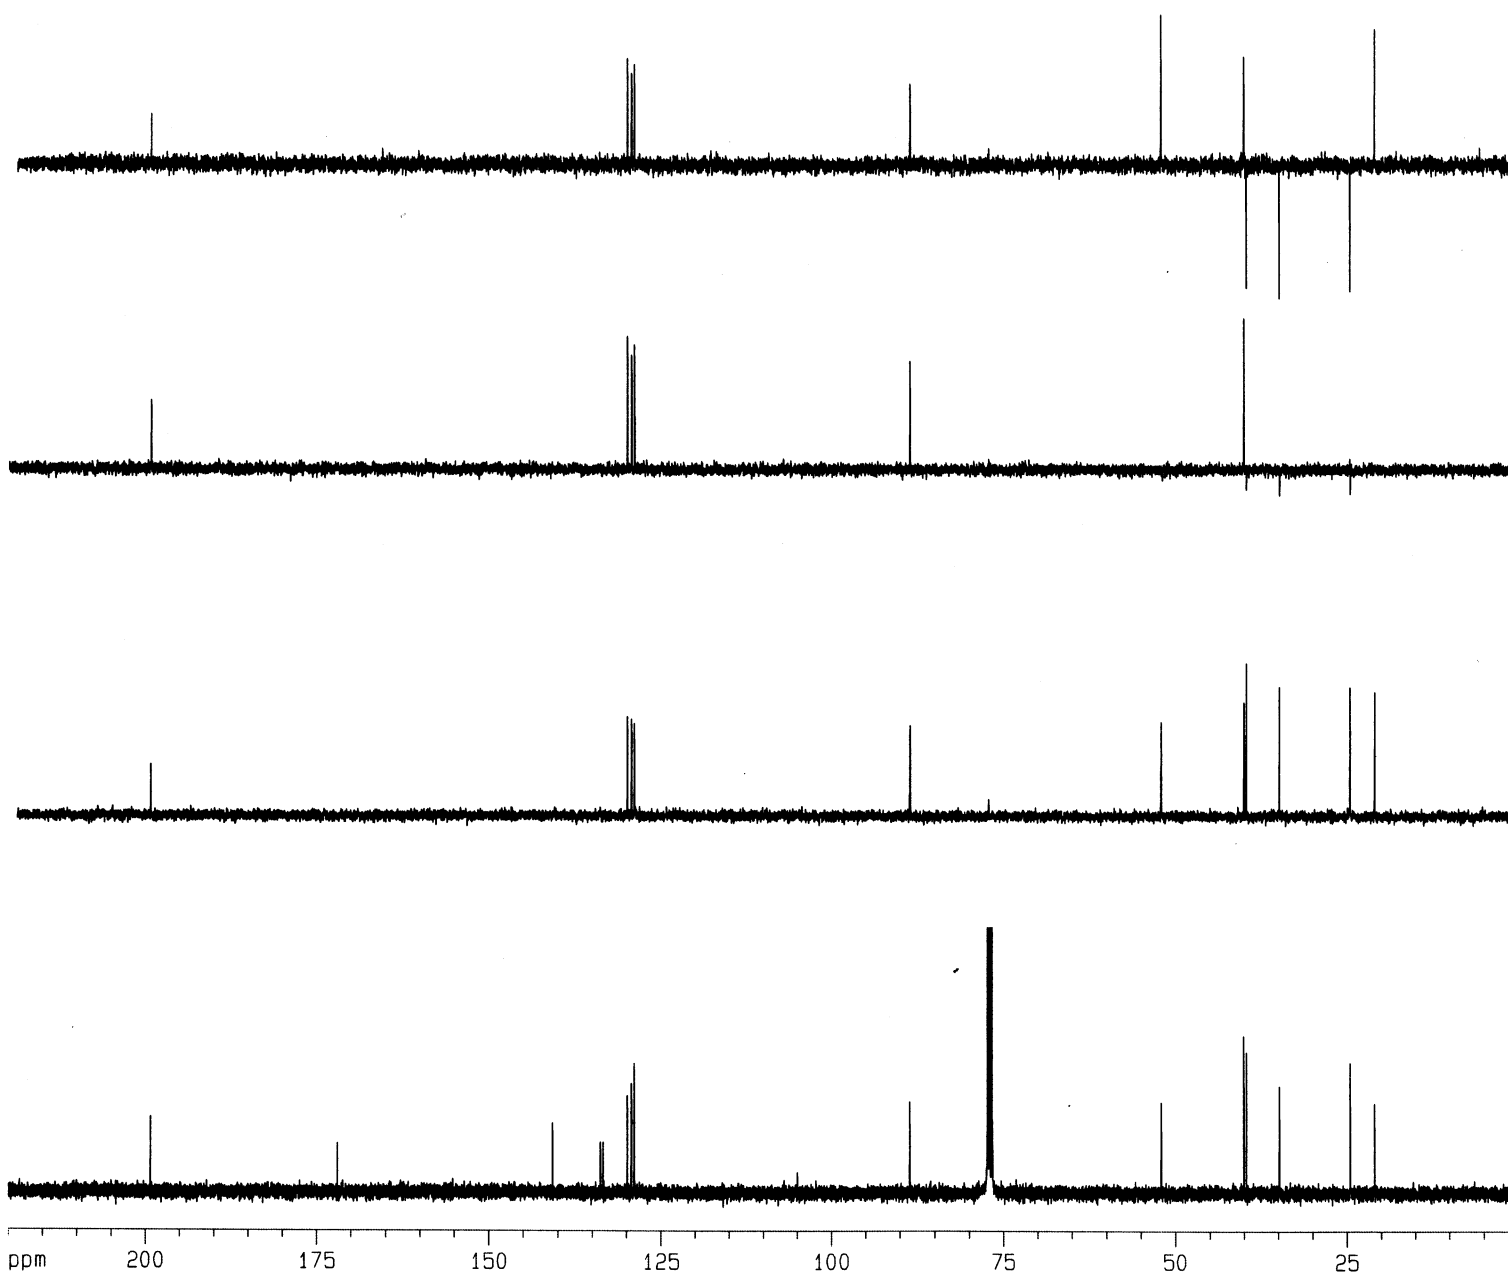

## Current Data Parameters

NAME LCH-2-373-p2  
 EXPNO 2  
 PROCNO 1

## F2 - Acquisition Parameters

Date\_ 20150207  
 Time 3.07  
 INSTRUM spect  
 PROBHD 5 mm GNP 1H  
 PULPROG zgpg30  
 TD 65536  
 SOLVENT CDC13  
 NS 3686  
 DS 4  
 SWH 25125.629 Hz  
 FIDRES 0.383387 Hz  
 AQ 1.3042164 sec  
 RG 256  
 DW 19.900 usec  
 DE 6.50 usec  
 TE 300.0 K  
 D1 2.0000000 sec  
 d11 0.0300000 sec  
 d12 0.0000200 sec

## ===== CHANNEL f1 =====

NUC1 13C  
 P1 10.20 usec  
 PL1 0.00 dB  
 SF01 100.6237959 MHz

## ===== CHANNEL f2 =====

CPDPRG2 waltz16  
 NUC2 1H  
 PCPD2 90.00 usec  
 PL2 -3.00 dB  
 PL12 14.50 dB  
 PL13 17.50 dB  
 SF02 400.1326008 MHz

## F2 - Processing parameters

SI 32768  
 SF 100.6127708 MHz  
 WDW EM  
 SSB 0  
 LB 0.30 Hz  
 GB 0  
 PC 1.40

## 1D NMR plot parameters

CX 20.00 cm  
 F1P 220.000 ppm  
 F1 22134.81 Hz  
 F2P 0.000 ppm  
 F2 0.00 Hz  
 PPMCM 11.00000 ppm/cm  
 HZCM 1106.74048 Hz/cm

Fig S113. <sup>1</sup>H NMR (CDCl<sub>3</sub>, 400 MHz) of compound syn-3h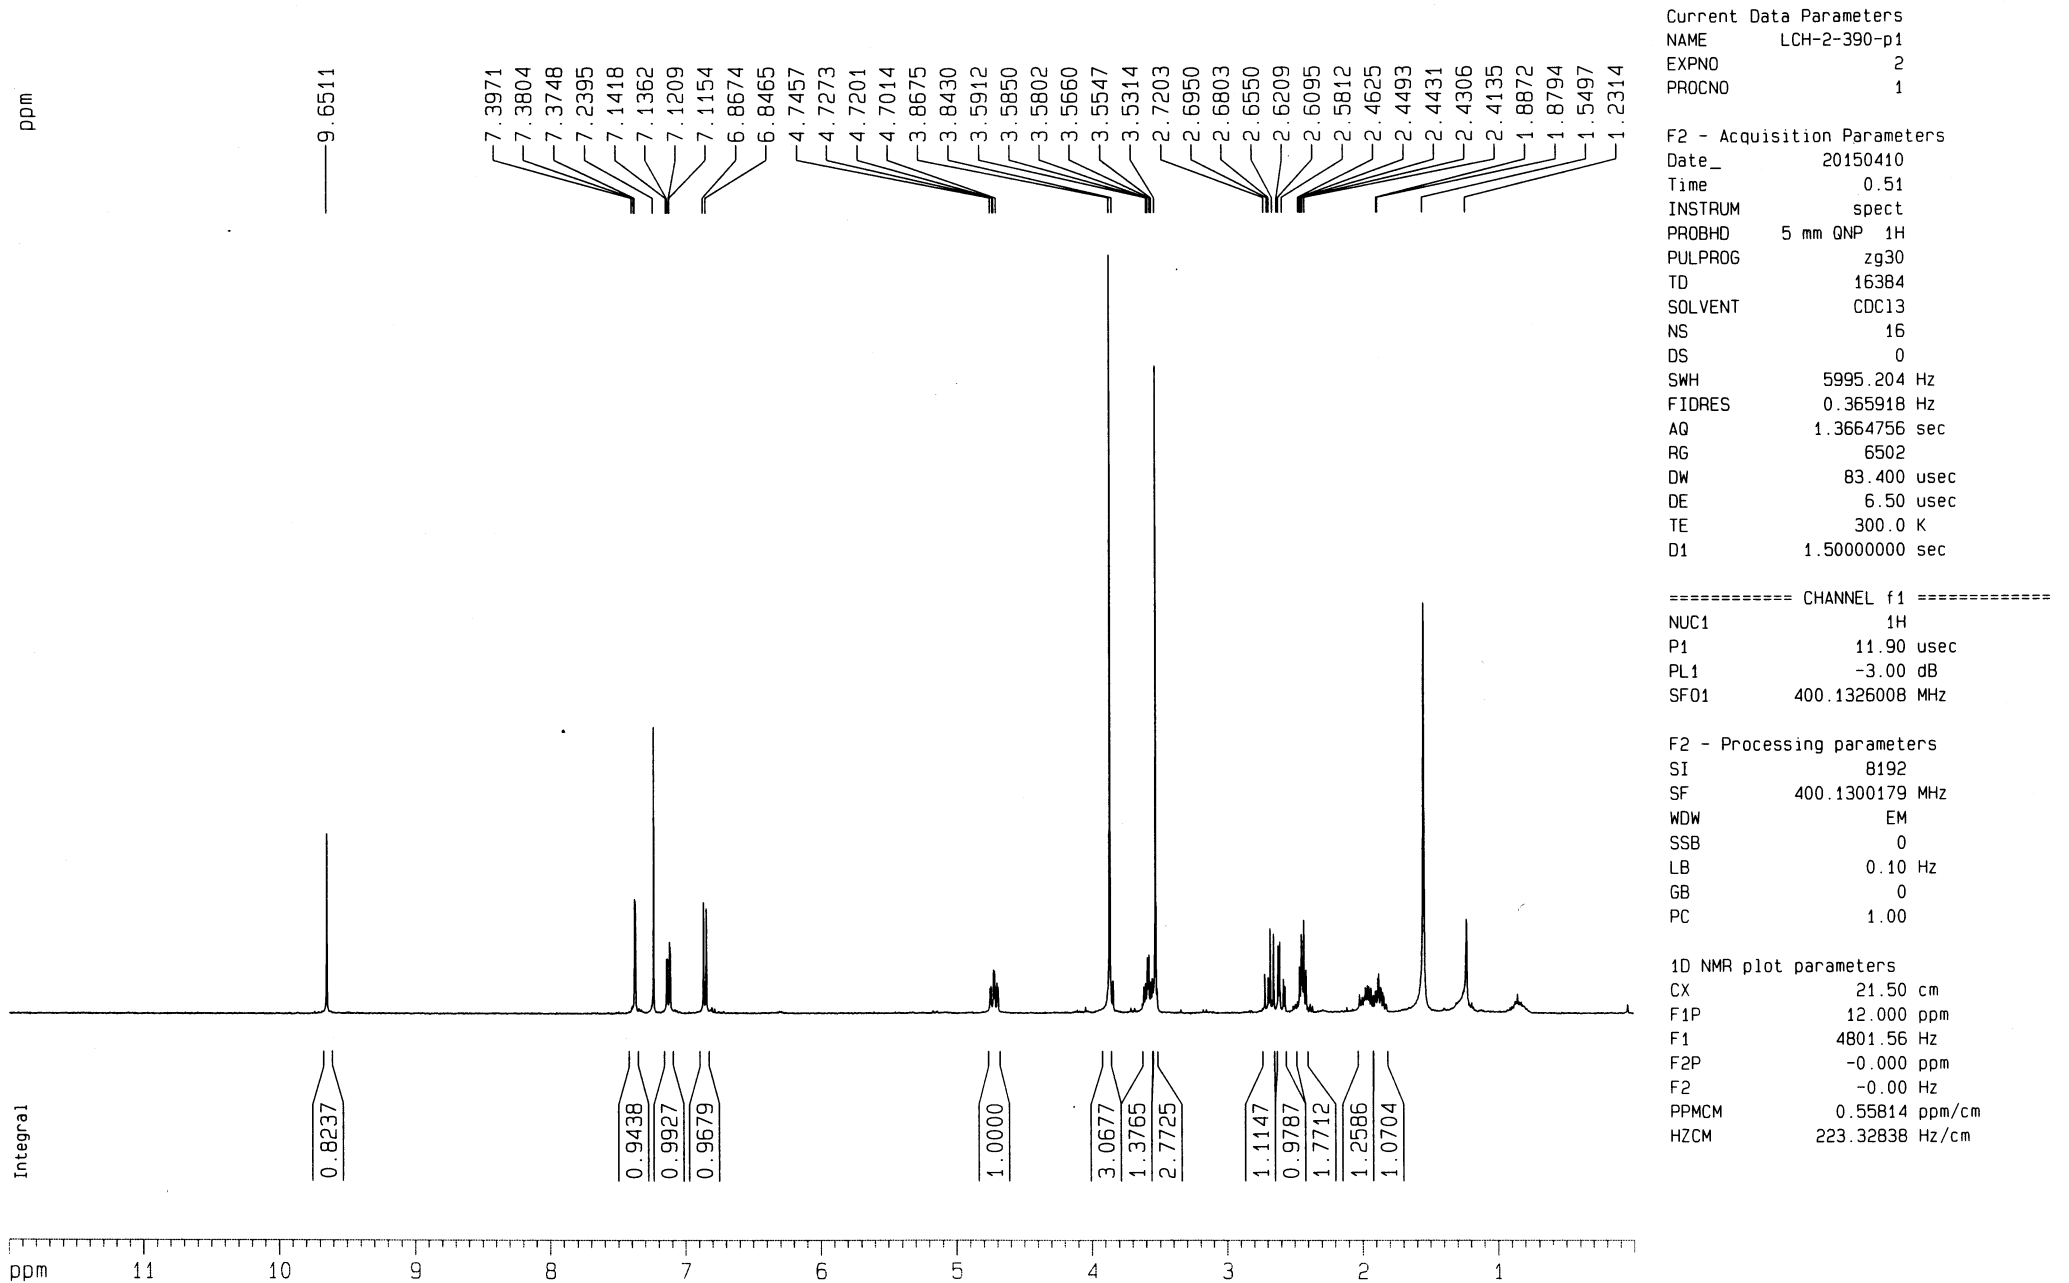

## C13 spectrum of

Fig S114. <sup>13</sup>C NMR (CDCl<sub>3</sub>, 100 MHz) of compound syn-3h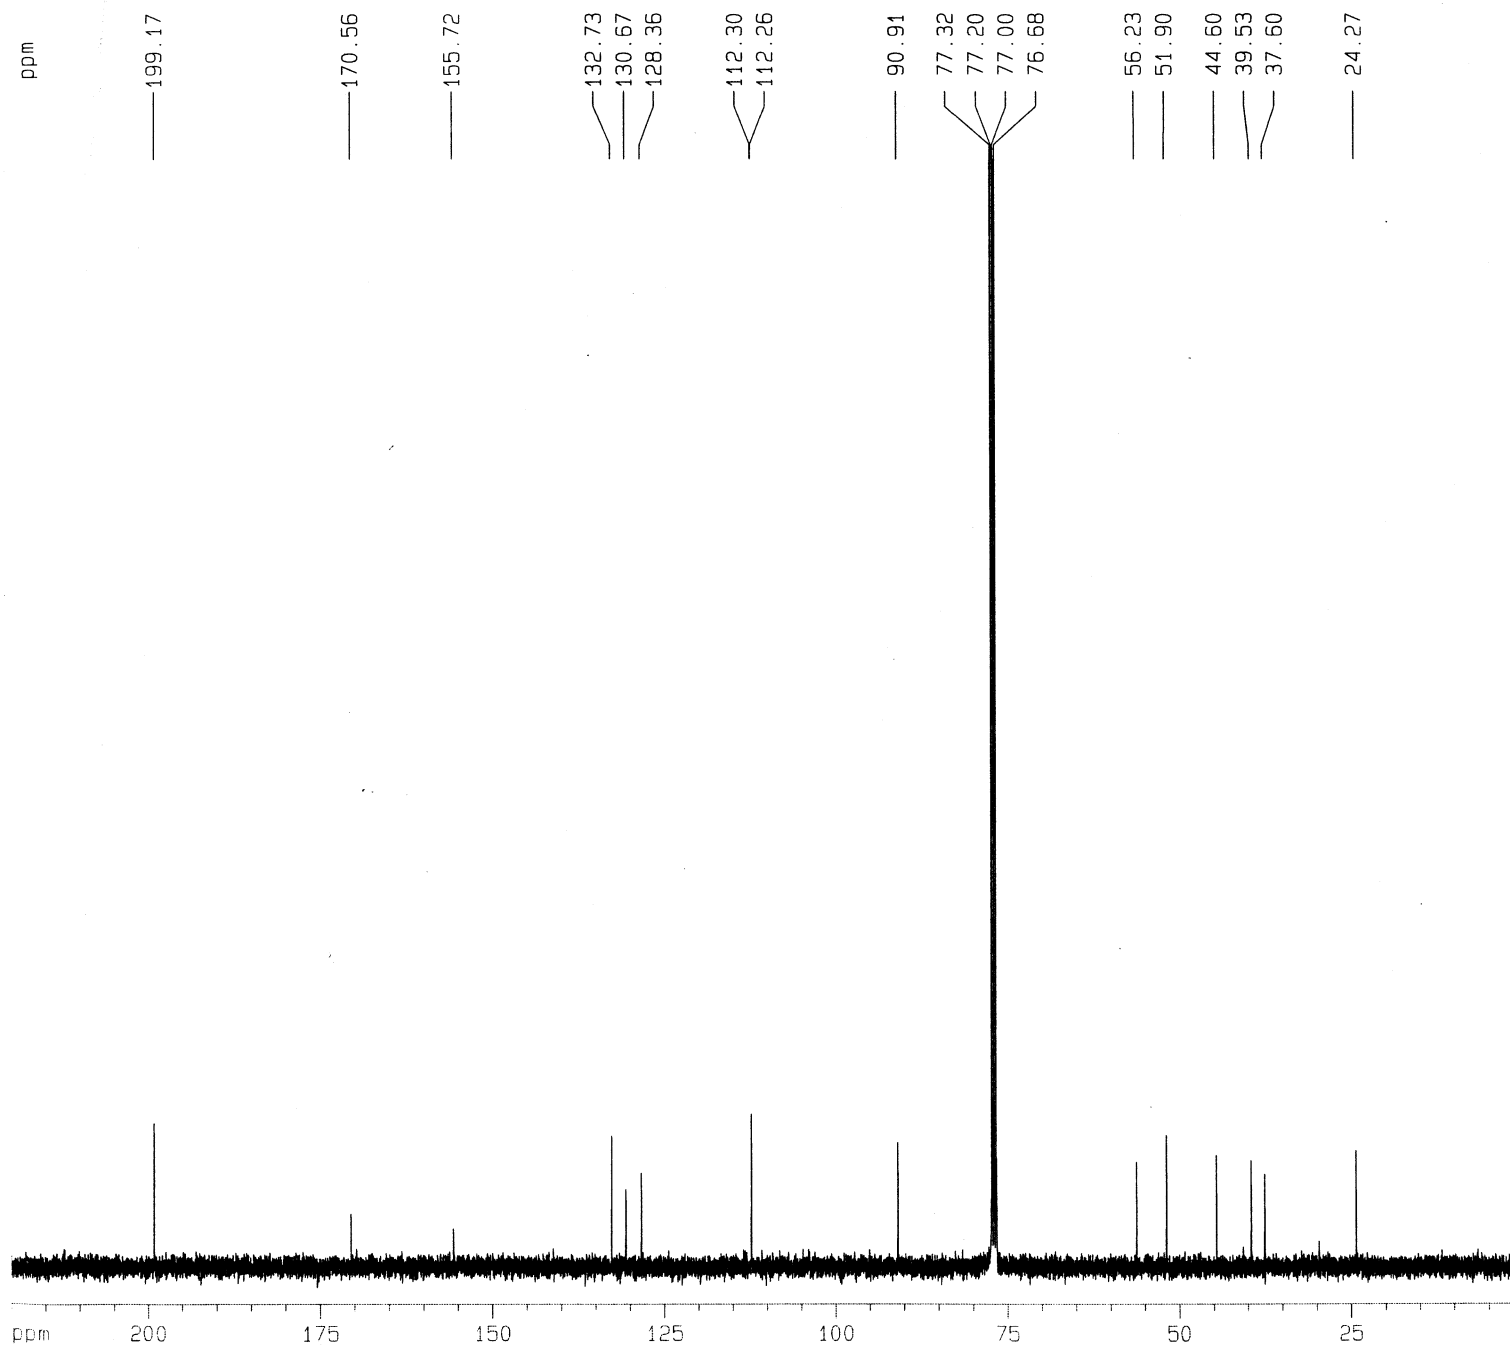

Current Data Parameters  
 NAME LCH-2-390-p1  
 EXPNO 3  
 PROCNO 1

F2 - Acquisition Parameters  
 Date\_ 20150410  
 Time 3.53  
 INSTRUM spect  
 PROBHD 5 mm QNP 1H  
 PULPROG zgpg30  
 TD 65536  
 SOLVENT CDCl3  
 NS 3276  
 DS 4  
 SWH 25125.629 Hz  
 FIDRES 0.383387 Hz  
 AQ 1.3042164 sec  
 RG 256  
 DW 19.900 usec  
 DE 6.50 usec  
 TE 300.0 K  
 D1 2.0000000 sec  
 d11 0.0300000 sec  
 d12 0.0000200 sec

===== CHANNEL f1 =====  
 NUC1 13C  
 P1 10.20 usec  
 PL1 0.00 dB  
 SF01 100.6237959 MHz

===== CHANNEL f2 =====  
 CPDPRG2 waltz16  
 NUC2 1H  
 PCPD2 90.00 usec  
 PL2 -3.00 dB  
 PL12 14.50 dB  
 PL13 17.50 dB  
 SF02 400.1326008 MHz

F2 - Processing parameters  
 SI 32768  
 SF 100.6127700 MHz  
 WDW EM  
 SSB 0  
 LB 0.30 Hz  
 GB 0  
 PC 1.40

1D NMR plot parameters  
 CX 20.00 cm  
 F1P 220.000 ppm  
 F1 22134.81 Hz  
 F2P 0.000 ppm  
 F2 0.00 Hz  
 PPMCM 11.00000 ppm/cm  
 HZCM 1106.74048 Hz/cm

Fig S115. DEPT of compound syn-3h

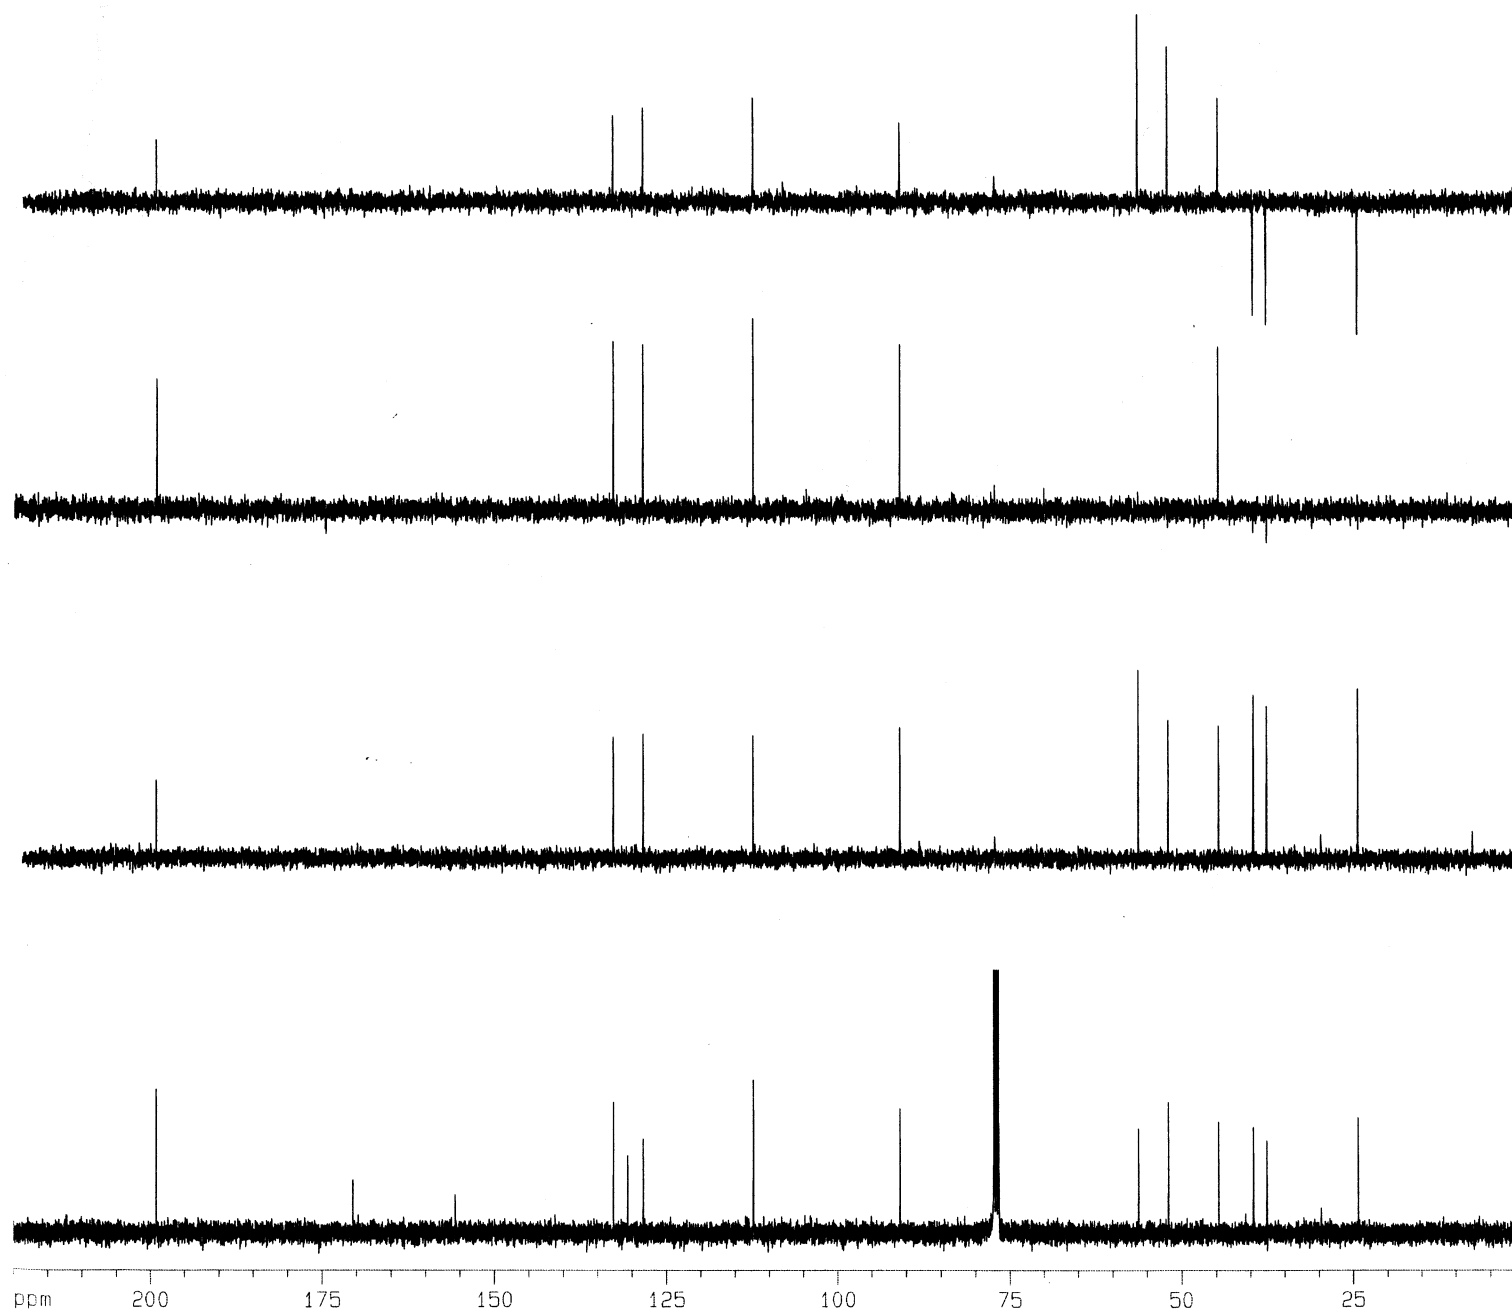

Current Data Parameters  
 NAME LCH-2-390-p1  
 EXPNO 3  
 PROCNO 1

F2 - Acquisition Parameters  
 Date\_ 20150410  
 Time 3.53  
 INSTRUM spect  
 PROBHD 5 mm GNP 1H  
 PULPROG zgpg30  
 TD 65536  
 SOLVENT CDCl3  
 NS 3276  
 DS 4  
 SWH 25125.629 Hz  
 FIDRES 0.383387 Hz  
 AQ 1.3042164 sec  
 RG 256  
 DW 19.900 usec  
 DE 6.50 usec  
 TE 300.0 K  
 D1 2.0000000 sec  
 d11 0.0300000 sec  
 d12 0.0000200 sec

===== CHANNEL f1 =====  
 NUC1 13C  
 P1 10.20 usec  
 PL1 0.00 dB  
 SF01 100.6237959 MHz

===== CHANNEL f2 =====  
 CPDPRG2 waltz16  
 NUC2 1H  
 PCPD2 90.00 usec  
 PL2 -3.00 dB  
 PL12 14.50 dB  
 PL13 17.50 dB  
 SF02 400.1326008 MHz

F2 - Processing parameters  
 SI 32768  
 SF 100.6127700 MHz  
 WDW EM  
 SSB 0  
 LB 0.30 Hz  
 GB 0  
 PC 1.40

1D NMR plot parameters  
 CX 20.00 cm  
 F1P 220.000 ppm  
 F1 22134.81 Hz  
 F2P 0.000 ppm  
 F2 0.00 Hz  
 PPMCM 11.00000 ppm/cm  
 HZCM 1106.74048 Hz/cm

Fig S116. <sup>1</sup>H NMR (CDCl<sub>3</sub>, 400 MHz) of compound anti-3h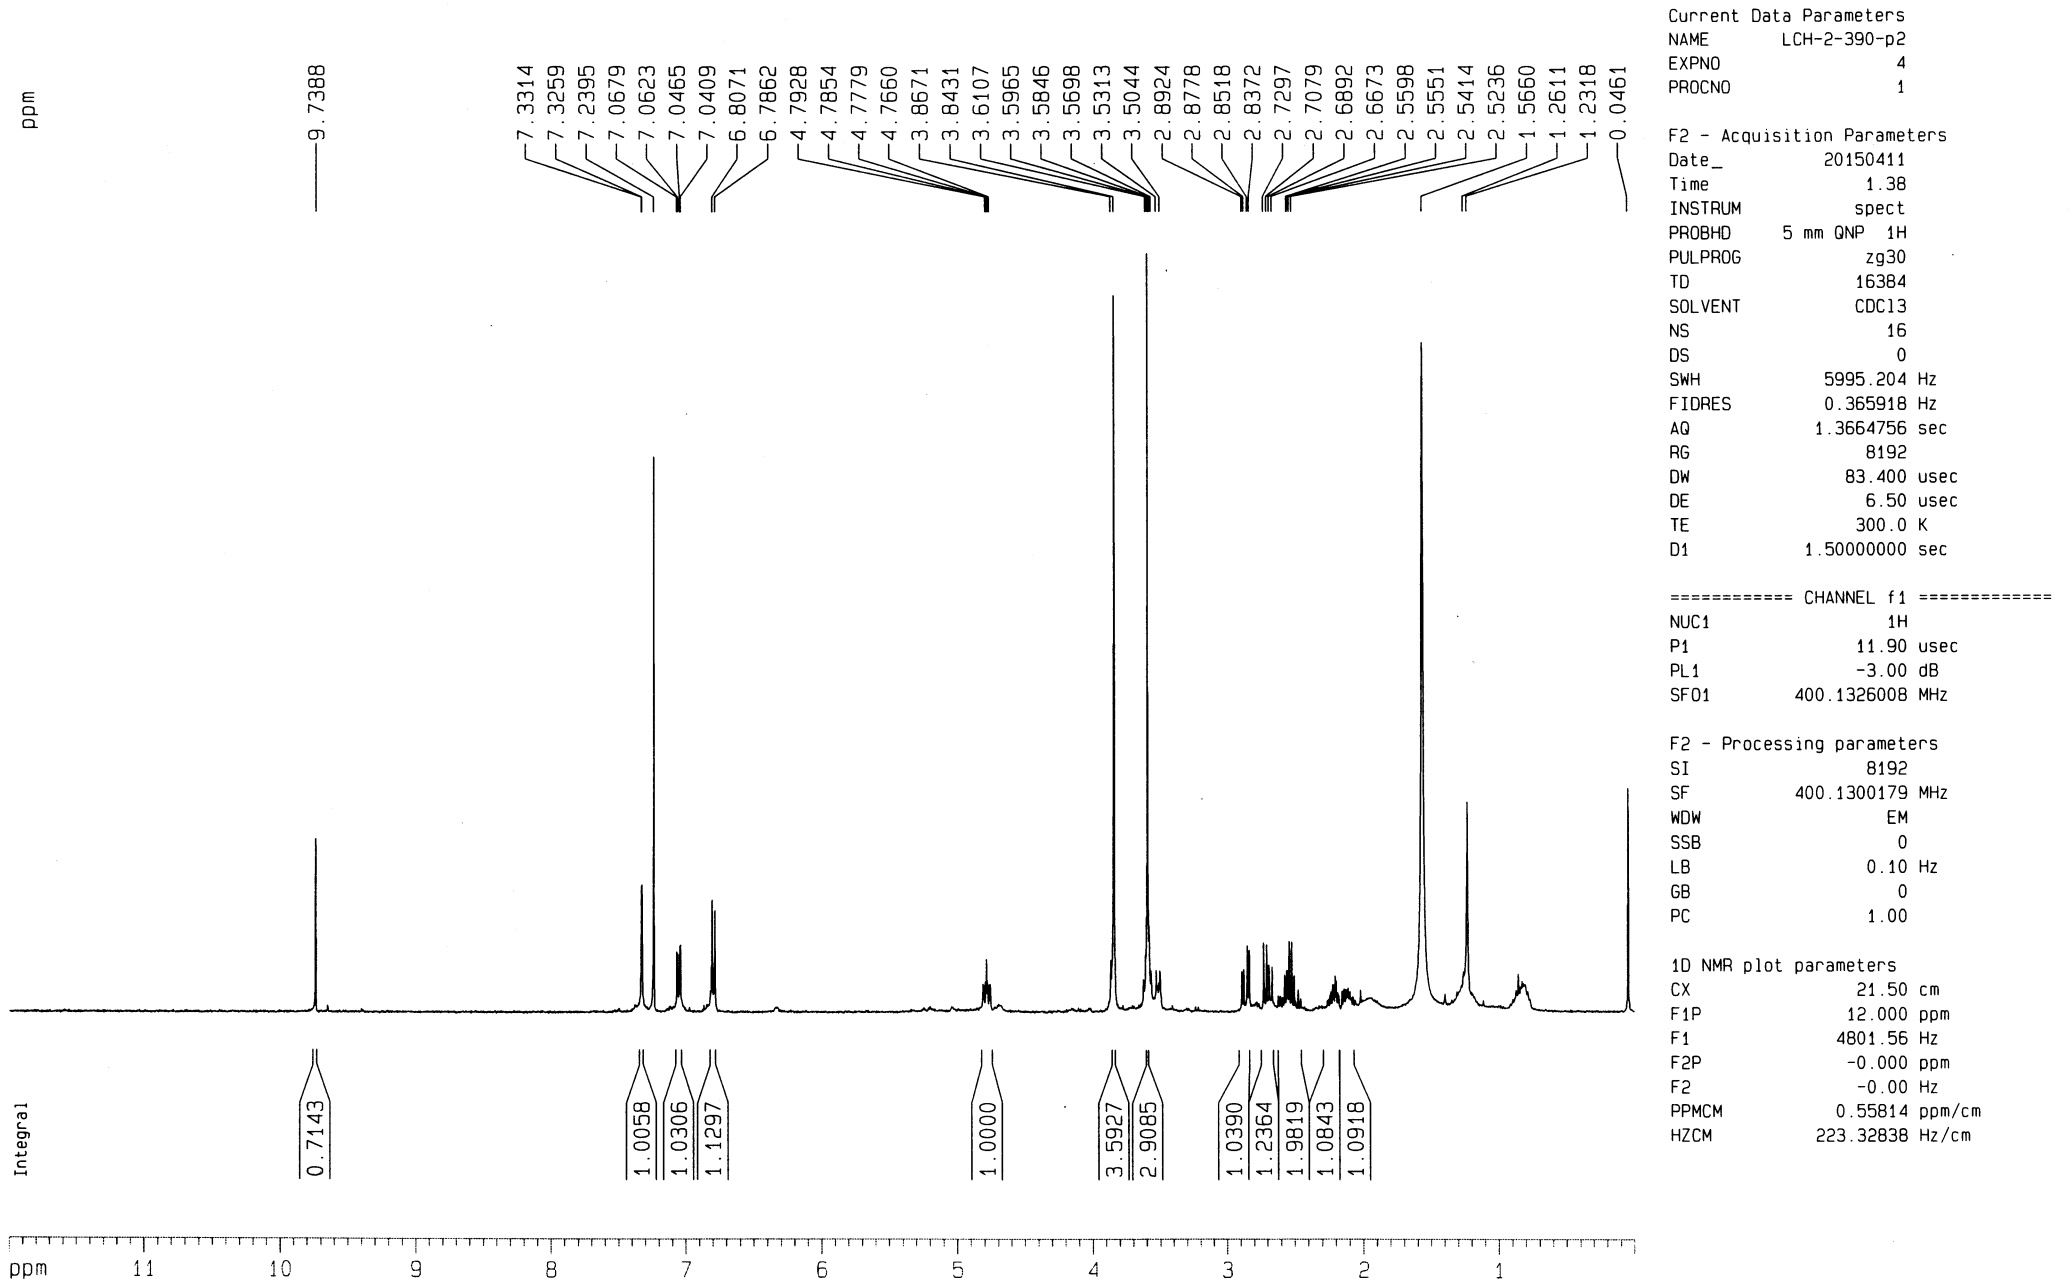



## C13 spectrum of

Fig S117. <sup>13</sup>C NMR (CDCl<sub>3</sub>, 100 MHz) of compound anti-3h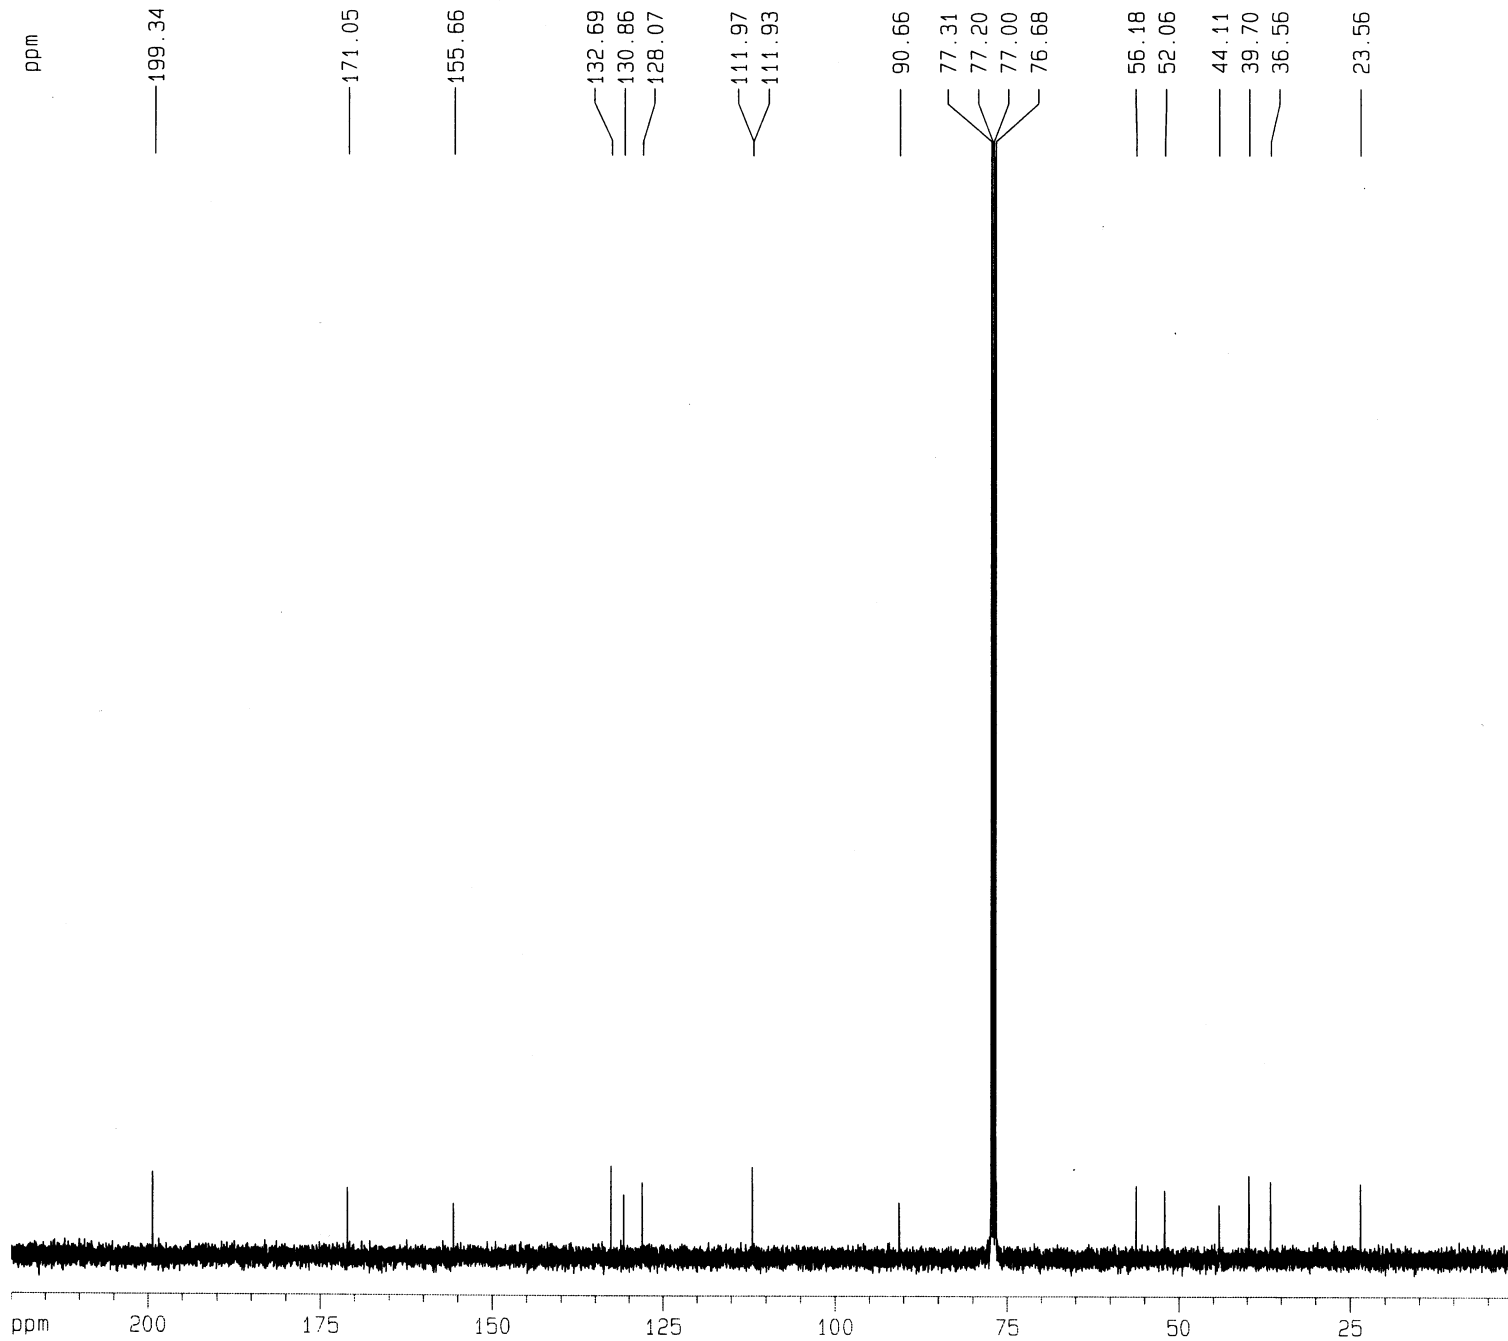

Current Data Parameters  
 NAME LCH-2-390-p2  
 EXPNO 5  
 PROCNO 1

F2 - Acquisition Parameters  
 Date\_ 20150411  
 Time 4.40  
 INSTRUM spect  
 PROBHD 5 mm QNP 1H  
 PULPROG zgpg30  
 TD 65536  
 SOLVENT CDCl3  
 NS 3276  
 DS 4  
 SWH 25125.629 Hz  
 FIDRES 0.383387 Hz  
 AQ 1.3042164 sec  
 RG 256  
 DW 19.900 usec  
 DE 6.50 usec  
 TE 300.0 K  
 D1 2.00000000 sec  
 d11 0.03000000 sec  
 d12 0.00002000 sec

===== CHANNEL f1 =====  
 NUC1 13C  
 P1 10.20 usec  
 PL1 0.00 dB  
 SF01 100.6237959 MHz

===== CHANNEL f2 =====  
 CPDPRG2 waltz16  
 NUC2 1H  
 PCPD2 90.00 usec  
 PL2 -3.00 dB  
 PL12 14.50 dB  
 PL13 17.50 dB  
 SF02 400.1326008 MHz

F2 - Processing parameters  
 S1 32768  
 SF 100.6127700 MHz  
 WDW EM  
 SSB 0  
 LB 0.30 Hz  
 GB 0  
 PC 1.40

1D NMR plot parameters  
 CX 20.00 cm  
 F1P 220.000 ppm  
 F1 22134.81 Hz  
 F2P 0.000 ppm  
 F2 0.00 Hz  
 PPMCM 11.00000 ppm/cm  
 HZCM 1106.74048 Hz/cm

Fig S118. DEPT of compound anti-3h

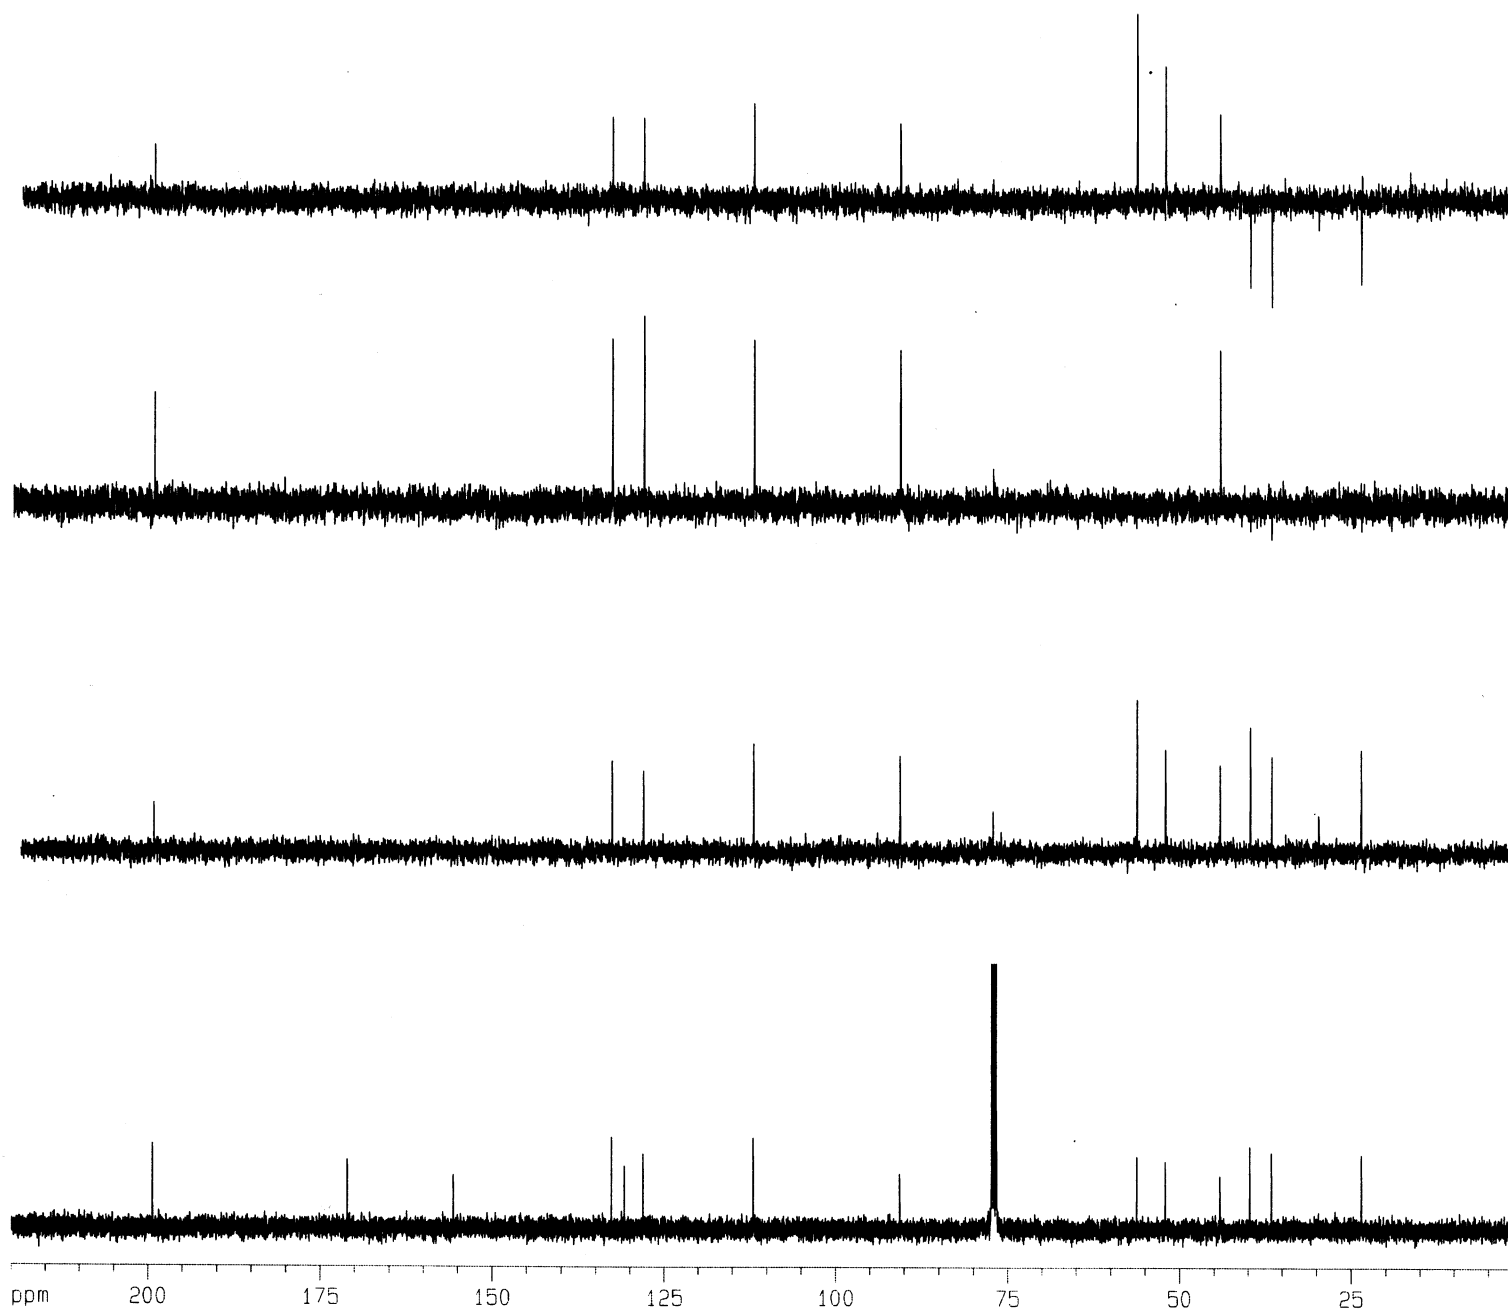

## Current Data Parameters

NAME LCH-2-390-p2  
 EXPNO 5  
 PROCNO 1

## F2 - Acquisition Parameters

Date\_ 20150411  
 Time 4.40  
 INSTRUM spect  
 PROBHD 5 mm QNP 1H  
 PULPROG zgpg30  
 TD 65536  
 SOLVENT CDC13  
 NS 3276  
 DS 4  
 SWH 25125.629 Hz  
 FIDRES 0.383387 Hz  
 AQ 1.3042164 sec  
 RG 256  
 DW 19.900 usec  
 DE 6.50 usec  
 TE 300.0 K  
 D1 2.0000000 sec  
 d11 0.03000000 sec  
 d12 0.00002000 sec

## ===== CHANNEL f1 =====

NUC1 13C  
 P1 10.20 usec  
 PL1 0.00 dB  
 SF01 100.6237959 MHz

## ===== CHANNEL f2 =====

CPDPRG2 waltz16  
 NUC2 1H  
 PCPD2 90.00 usec  
 PL2 -3.00 dB  
 PL12 14.50 dB  
 PL13 17.50 dB  
 SF02 400.1326008 MHz

## F2 - Processing parameters

SI 32768  
 SF 100.6127700 MHz  
 WDW EM  
 SSB 0  
 LB 0.30 Hz  
 GB 0  
 PC 1.40

## 1D NMR plot parameters

CX 20.00 cm  
 F1P 220.000 ppm  
 F1 22134.81 Hz  
 F2P 0.000 ppm  
 F2 0.00 Hz  
 PPMCM 11.00000 ppm/cm  
 HZCM 1106.74048 Hz/cm

Fig S119. <sup>1</sup>H NMR (CDCl<sub>3</sub>, 400 MHz) of compound syn-3i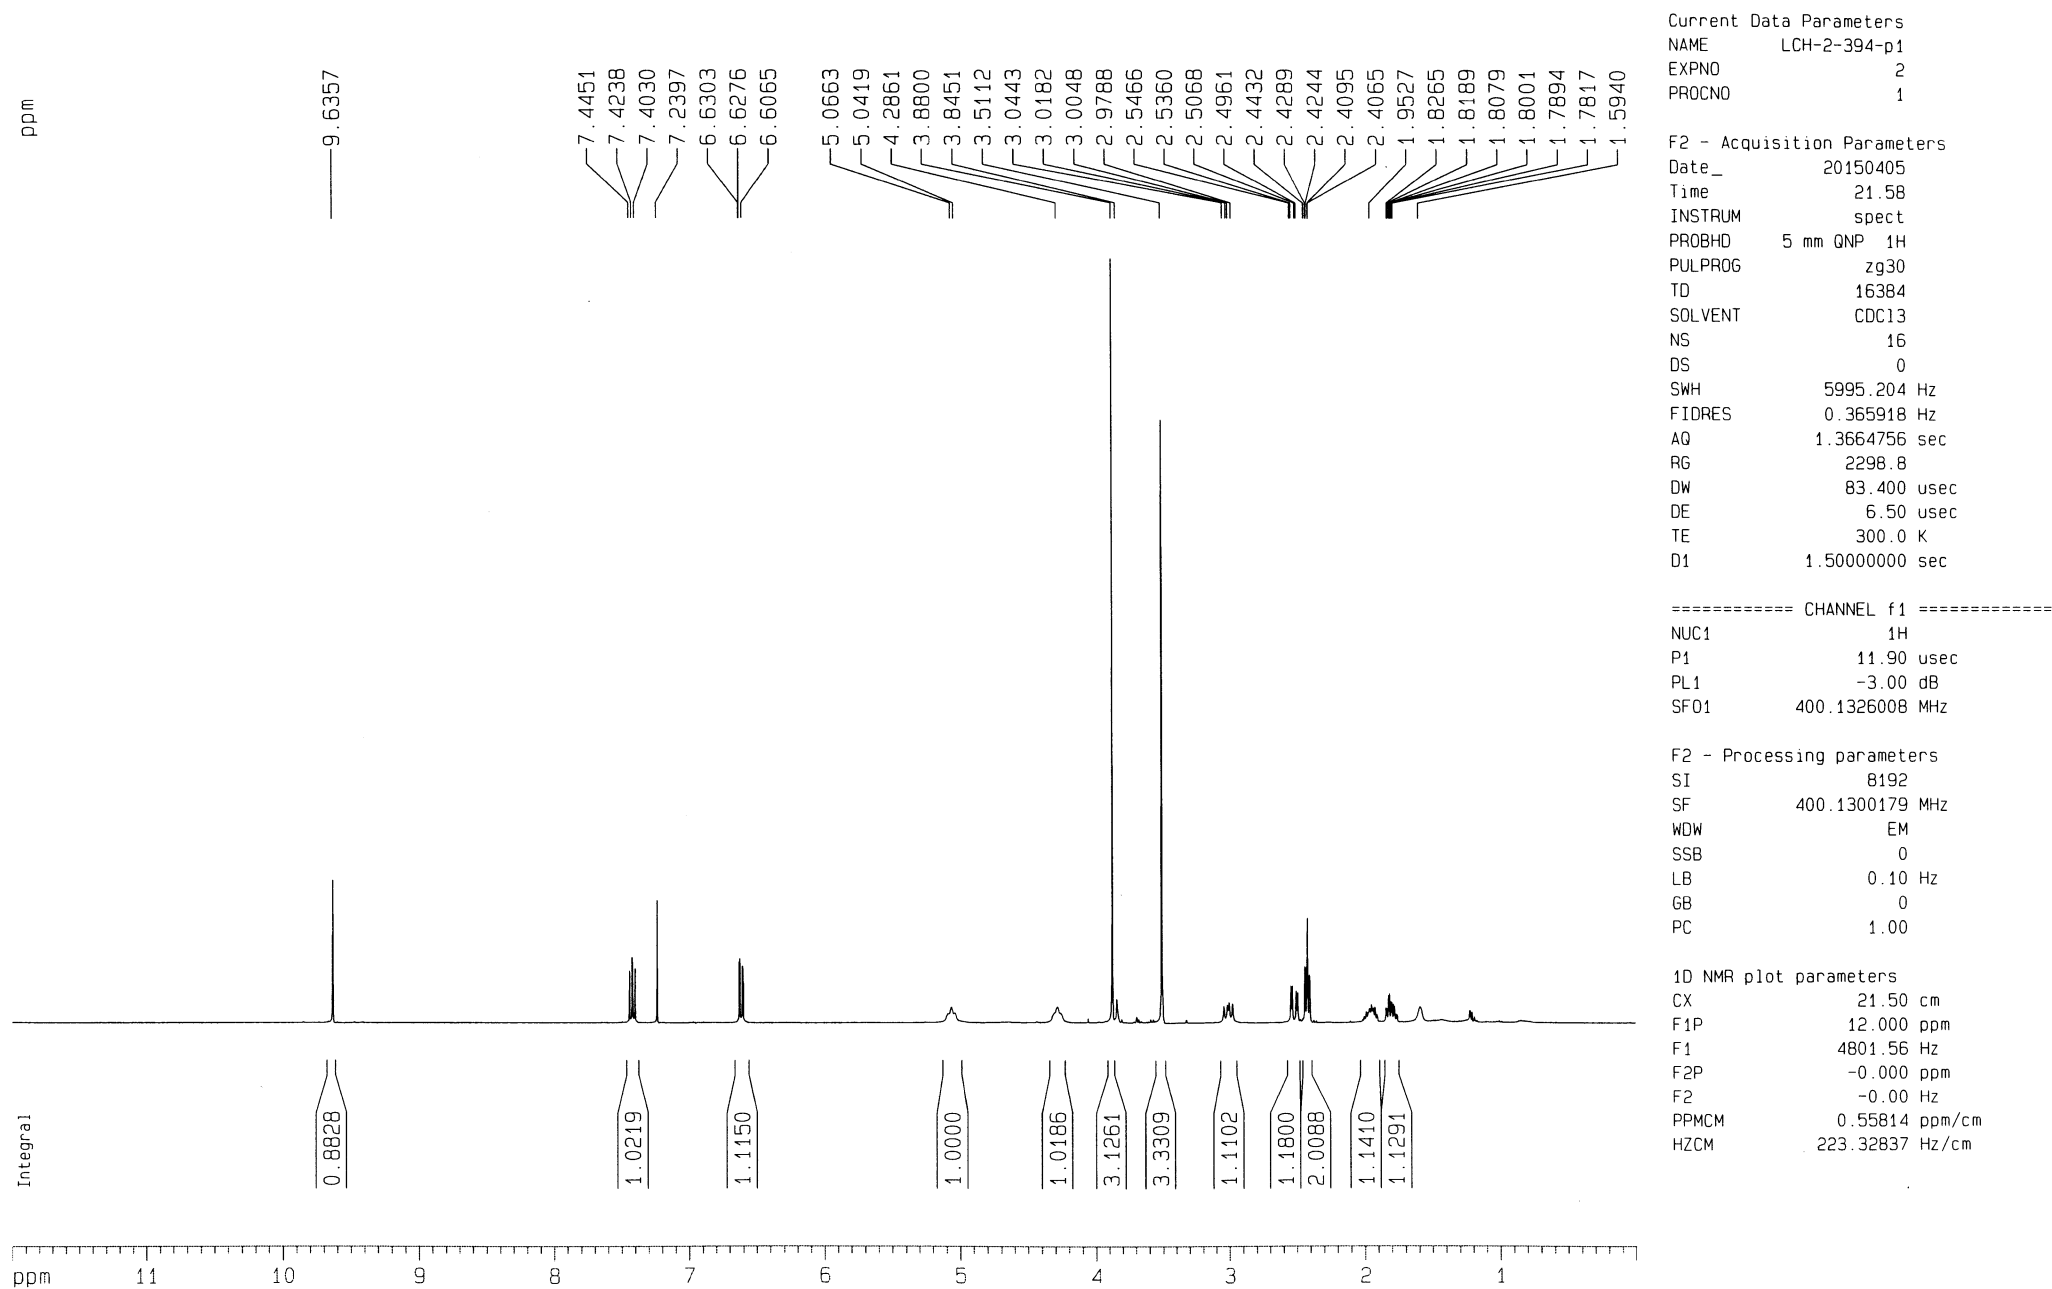

## C13 spectrum of

Fig S120. 13C NMR (CDCl3, 100 MHz) of compound syn-3i

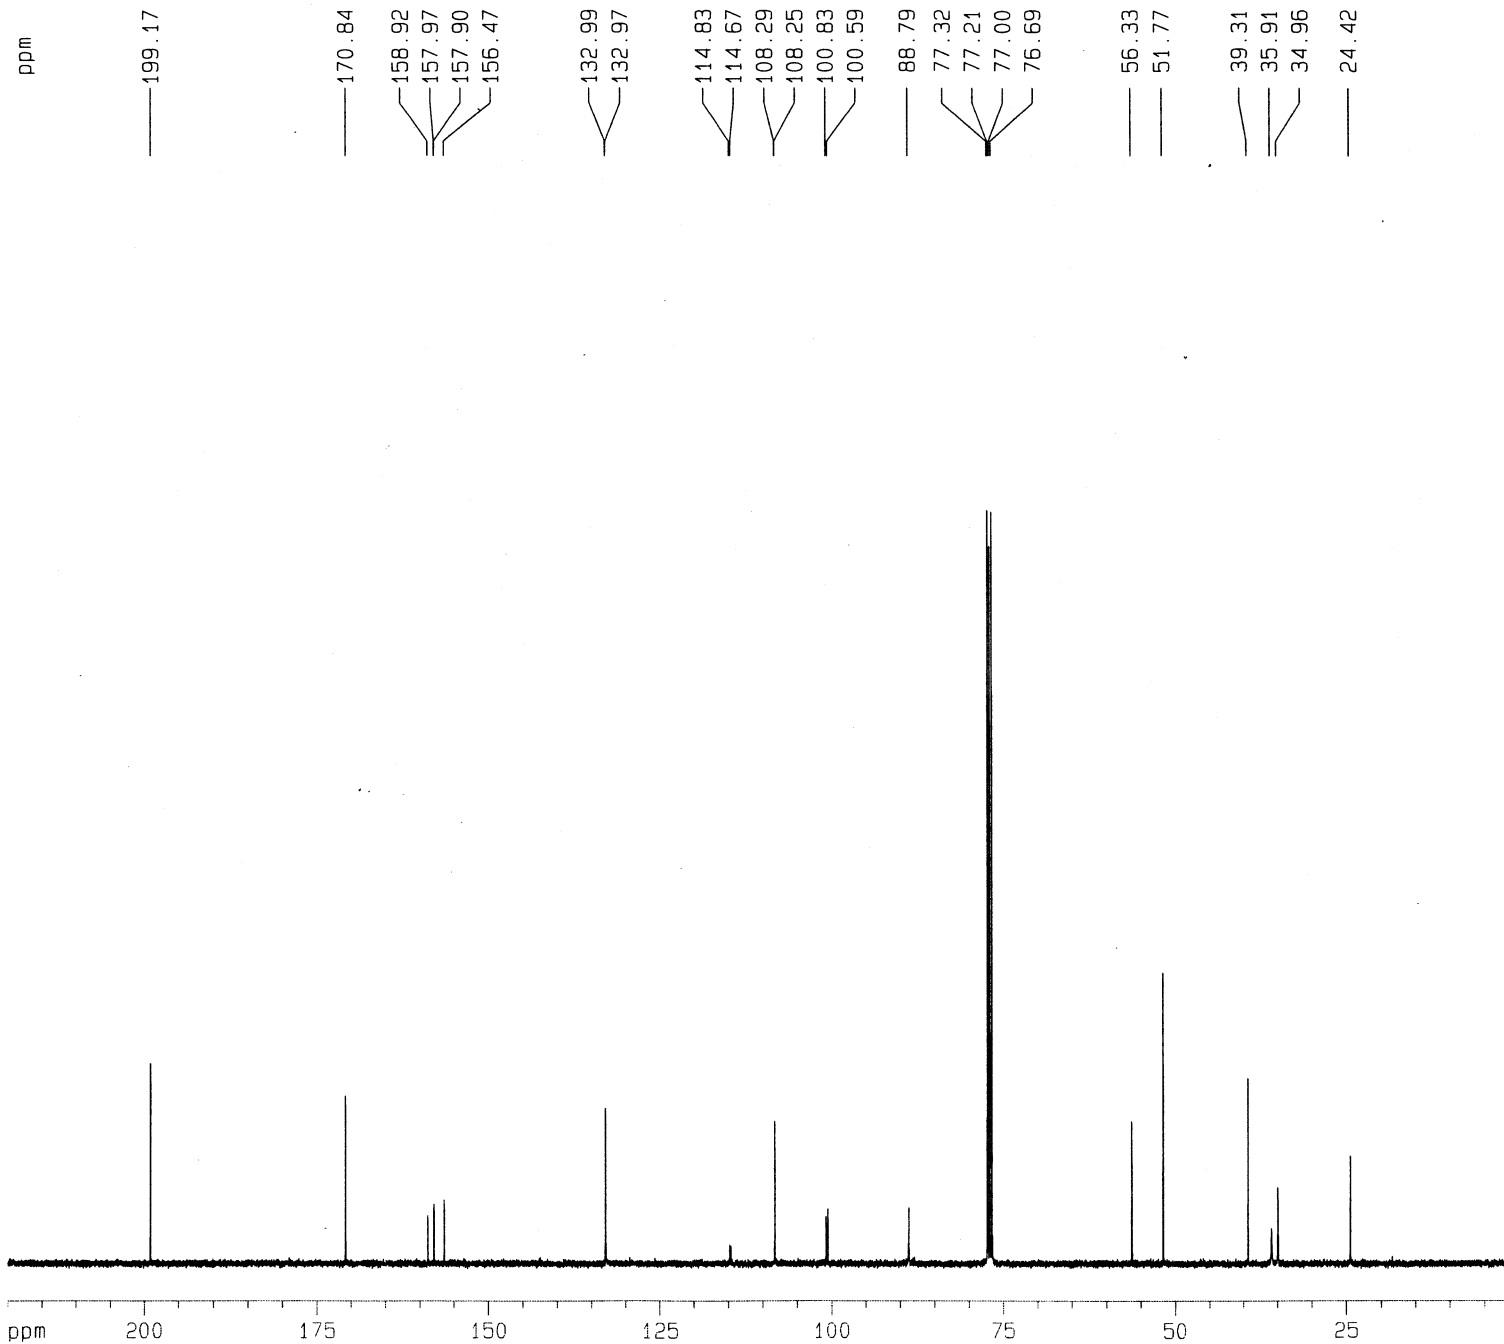

## Current Data Parameters

NAME LCH-2-394-p1  
EXPNO 3  
PROCNO 1

## F2 - Acquisition Parameters

Date\_ 20150406  
Time 1.46  
INSTRUM spect  
PROBHD 5 mm QNP 1H  
PULPROG zgpg30  
TD 65536  
SOLVENT CDCl3  
NS 4096  
DS 4  
SWH 25125.629 Hz  
FIDRES 0.383387 Hz  
AQ 1.3042164 sec  
RG 256  
DW 19.900 usec  
DE 6.50 usec  
TE 300.0 K  
D1 2.00000000 sec  
d11 0.03000000 sec  
d12 0.00002000 sec

## ===== CHANNEL f1 =====

NUC1 13C  
P1 10.20 usec  
PL1 0.00 dB  
SF01 100.6237959 MHz

## ===== CHANNEL f2 =====

CPDPRG2 waltz16  
NUC2 1H  
PCPD2 90.00 usec  
PL2 -3.00 dB  
PL12 14.50 dB  
PL13 17.50 dB  
SF02 400.1326008 MHz

## F2 - Processing parameters

SI 32768  
SF 100.6127723 MHz  
WDW EM  
SSB 0  
LB 0.30 Hz  
GB 0  
PC 1.40

## 1D NMR plot parameters

CX 20.00 cm  
F1P 220.000 ppm  
F1 22134.81 Hz  
F2P 0.000 ppm  
F2 0.00 Hz  
PPMCM 11.00000 ppm/cm  
HZCM 1106.74048 Hz/cm

Fig S121. DEPT of compound syn-3i

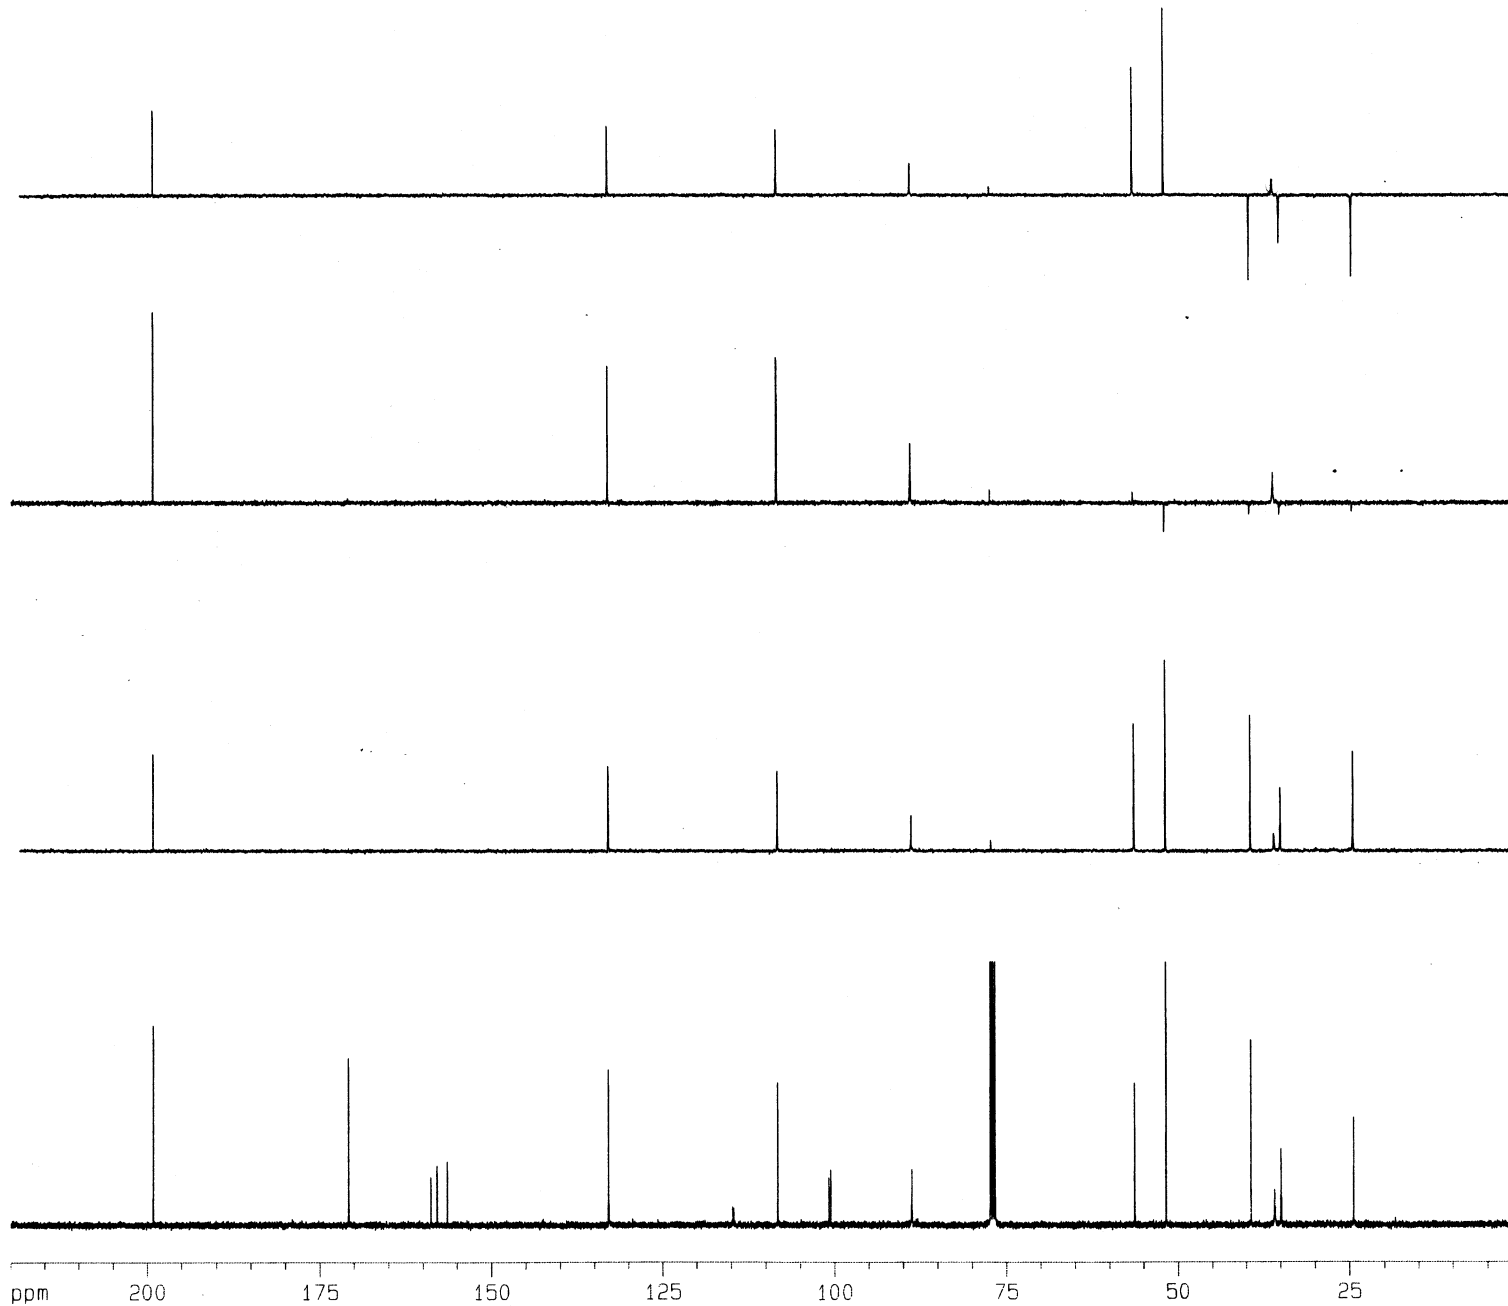

Current Data Parameters  
 NAME LCH-2-394-p1  
 EXPNO 3  
 PROCNO 1

F2 - Acquisition Parameters  
 Date\_ 20150406  
 Time 1.46  
 INSTRUM spect  
 PROBHD 5 mm GNP 1H  
 PULPROG zgpg30  
 TD 65536  
 SOLVENT CDCl3  
 NS 4096  
 DS 4  
 SWH 25125.629 Hz  
 FIDRES 0.383387 Hz  
 AQ 1.3042164 sec  
 RG 256  
 DW 19.900 usec  
 DE 6.50 usec  
 TE 300.0 K  
 D1 2.00000000 sec  
 d11 0.03000000 sec  
 d12 0.00002000 sec

===== CHANNEL f1 =====  
 NUC1 13C  
 P1 10.20 usec  
 PL1 0.00 dB  
 SF01 100.6237959 MHz

===== CHANNEL f2 =====  
 CPDPRG2 waltz16  
 NUC2 1H  
 PCPD2 90.00 usec  
 PL2 -3.00 dB  
 PL12 14.50 dB  
 PL13 17.50 dB  
 SF02 400.1326008 MHz

F2 - Processing parameters  
 SI 32768  
 SF 100.6127723 MHz  
 WDW EM  
 SSB 0  
 LB 0.30 Hz  
 GB 0  
 PC 1.40

1D NMR plot parameters  
 CX 20.00 cm  
 F1P 220.000 ppm  
 F1 22134.81 Hz  
 F2P 0.000 ppm  
 F2 0.00 Hz  
 PPMCM 11.00000 ppm/cm  
 HZCM 1106.74048 Hz/cm

Fig S122. <sup>1</sup>H NMR (CDCl<sub>3</sub>, 400 MHz) of compound anti-3i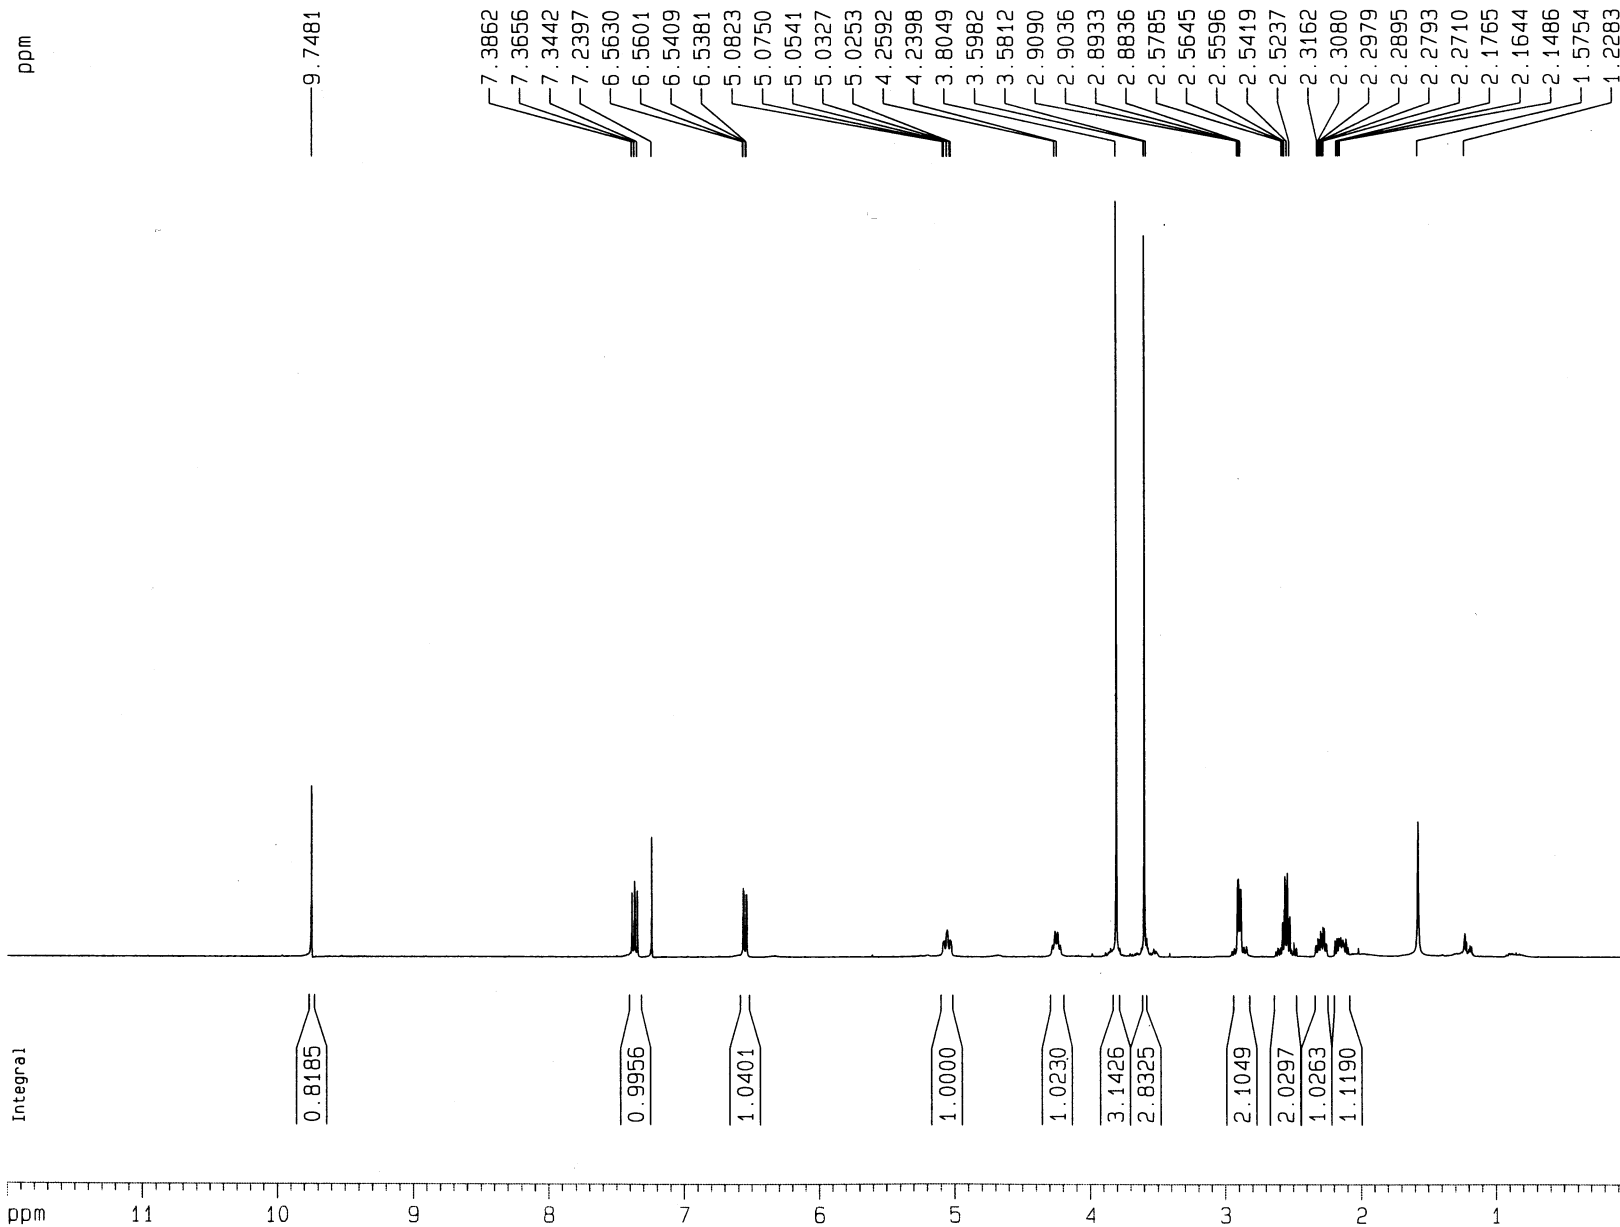

## Current Data Parameters

NAME LCH-2-394-p2  
EXPNO 1  
PROCNO 1

## F2 - Acquisition Parameters

Date\_ 20150406  
Time 23.49  
INSTRUM spect  
PROBHD 5 mm QNP 1H  
PULPROG zg30  
TD 16384  
SOLVENT CDCl3  
NS 16  
DS 0  
SWH 5995.204 Hz  
FIDRES 0.365918 Hz  
AQ 1.3664756 sec  
RG 3649.1  
DW 83.400 usec  
DE 6.50 usec  
TE 300.0 K  
D1 1.50000000 sec

## ===== CHANNEL f1 =====

NUC1 1H  
P1 11.90 usec  
PL1 -3.00 dB  
SFO1 400.1326008 MHz

## F2 - Processing parameters

SI 8192  
SF 400.1300179 MHz  
WDW EM  
SSB 0  
LB 0.10 Hz  
GB 0  
PC 1.00

## 1D NMR plot parameters

CX 21.50 cm  
F1P 12.000 ppm  
F1 4801.56 Hz  
F2P -0.000 ppm  
F2 -0.00 Hz  
PPMCM 0.55814 ppm/cm  
HZCM 223.32838 Hz/cm

## C13 spectrum of

Fig S123. 13C NMR (CDCl3, 100 MHz) of compound anti-3i

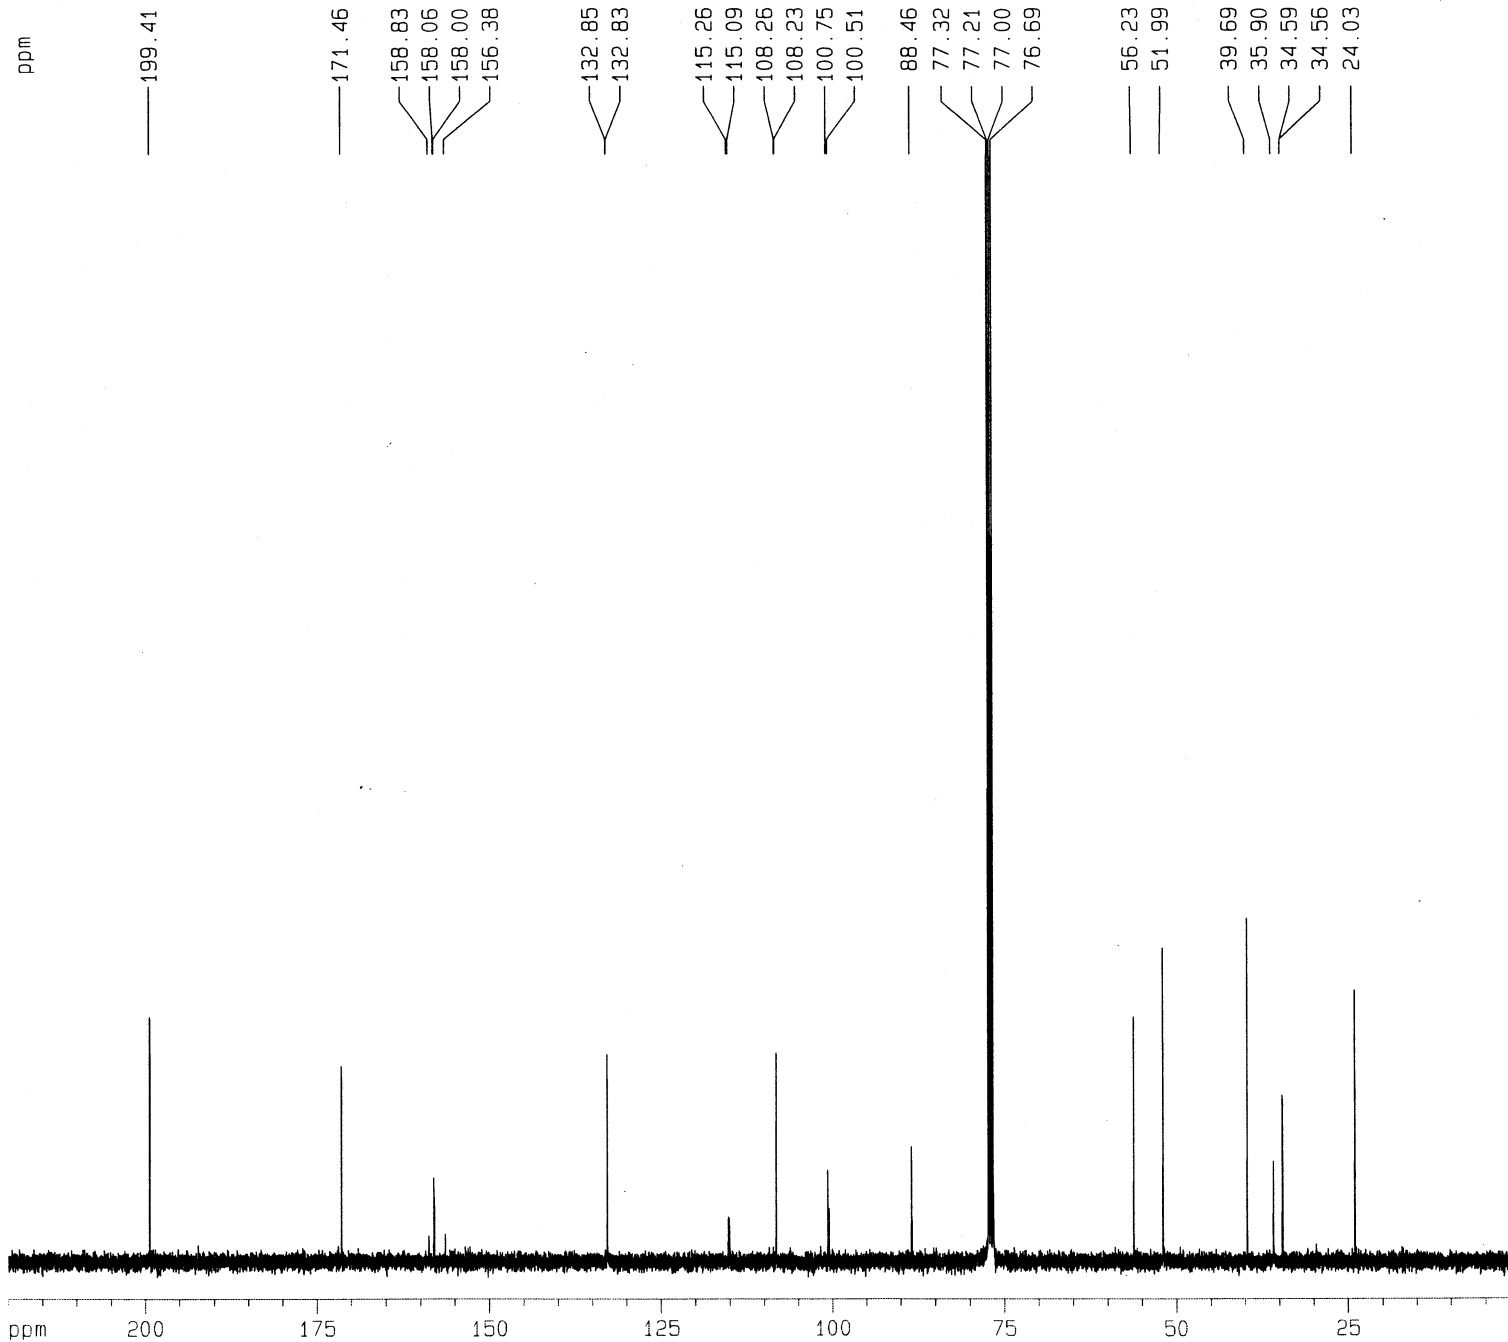

Current Data Parameters  
 NAME LCH-2-394-p2  
 EXPNO 2  
 PROCNO 1

F2 - Acquisition Parameters  
 Date\_ 20150407  
 Time 3.15  
 INSTRUM spect  
 PROBHD 5 mm QNP 1H  
 PULPROG zgpg30  
 TD 65536  
 SOLVENT CDCl3  
 NS 3686  
 DS 4  
 SWH 25125.629 Hz  
 FIDRES 0.383387 Hz  
 AQ 1.3042164 sec  
 RG 256  
 DW 19.900 usec  
 DE 6.50 usec  
 TE 300.0 K  
 D1 2.00000000 sec  
 d11 0.03000000 sec  
 d12 0.00002000 sec

===== CHANNEL f1 =====  
 NUC1 13C  
 P1 10.20 usec  
 PL1 0.00 dB  
 SF01 100.6237959 MHz

===== CHANNEL f2 =====  
 CPDPRG2 waltz16  
 NUC2 1H  
 PCPD2 90.00 usec  
 PL2 -3.00 dB  
 PL12 14.50 dB  
 PL13 17.50 dB  
 SF02 400.1326008 MHz

F2 - Processing parameters  
 SI 32768  
 SF 100.6127715 MHz  
 WDW EM  
 SSB 0  
 LB 0.30 Hz  
 GB 0  
 PC 1.40

1D NMR plot parameters  
 CX 20.00 cm  
 F1P 220.000 ppm  
 F1 22134.81 Hz  
 F2P 0.000 ppm  
 F2 0.00 Hz  
 PPMCM 11.00000 ppm/cm  
 HZCM 1106.74048 Hz/cm

Fig S124. DEPT of compound anti-3i

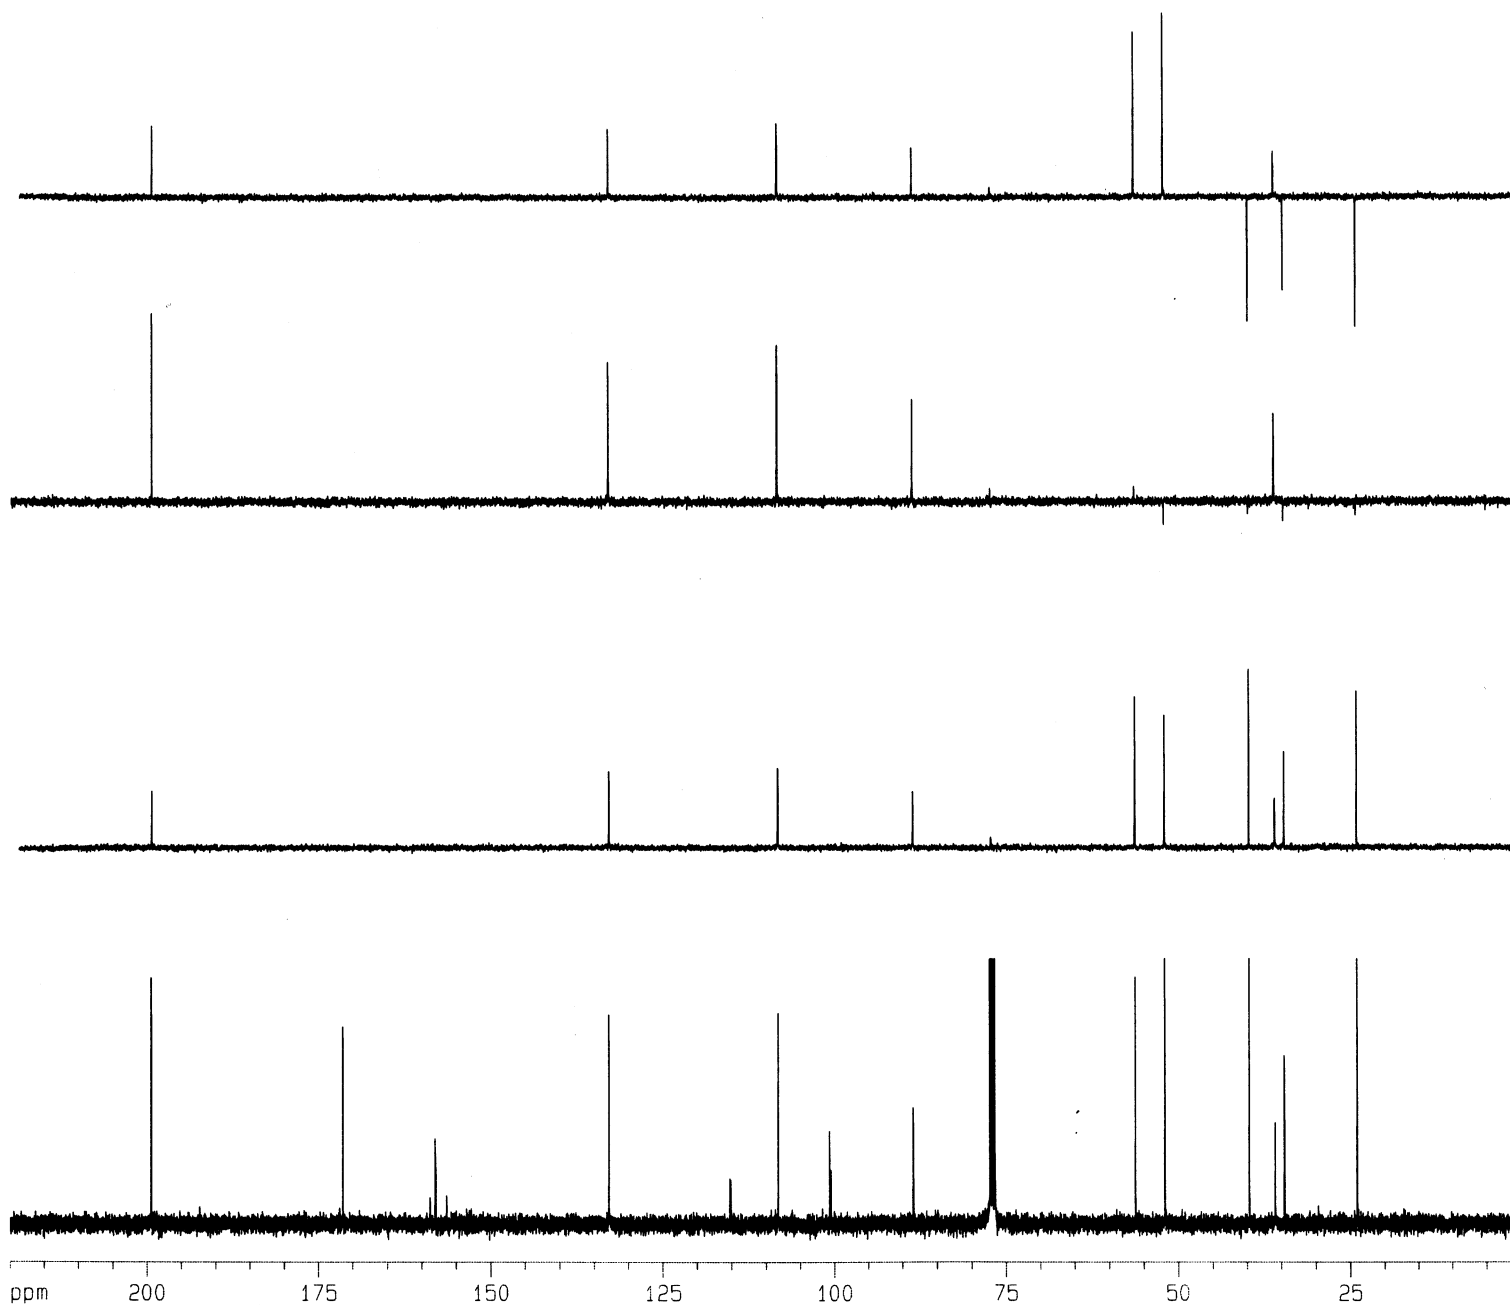

## Current Data Parameters

NAME LCH-2-394-p2  
 EXPNO 2  
 PROCNO 1

## F2 - Acquisition Parameters

Date\_ 20150407  
 Time 3.15  
 INSTRUM spect  
 PROBHD 5 mm QNP 1H  
 PULPROG zgpg30  
 TD 65536  
 SOLVENT CDC13  
 NS 3686  
 DS 4  
 SWH 25125.629 Hz  
 FIDRES 0.383387 Hz  
 AQ 1.3042164 sec  
 RG 256  
 DW 19.900 usec  
 DE 6.50 usec  
 TE 300.0 K  
 D1 2.0000000 sec  
 d11 0.0300000 sec  
 d12 0.00002000 sec

## ===== CHANNEL f1 =====

NUC1 13C  
 P1 10.20 usec  
 PL1 0.00 dB  
 SF01 100.6237959 MHz

## ===== CHANNEL f2 =====

CPDPRG2 waltz16  
 NUC2 1H  
 PCPD2 90.00 usec  
 PL2 -3.00 dB  
 PL12 14.50 dB  
 PL13 17.50 dB  
 SF02 400.1326008 MHz

## F2 - Processing parameters

SI 32768  
 SF 100.6127715 MHz  
 WDW EM  
 SSB 0  
 LB 0.30 Hz  
 GB 0  
 PC 1.40

## 1D NMR plot parameters

CX 20.00 cm  
 F1P 220.000 ppm  
 F1 22134.81 Hz  
 F2P 0.000 ppm  
 F2 0.00 Hz  
 PPMCM 11.00000 ppm/cm  
 HZCM 1106.74048 Hz/cm



LCH-2-332

Sample Name **LCH-2-332**  
Date collected **2014-12-04**Pulse sequence **s2pul**  
Solvent **cdcl3**Temperature **60**  
Spectrometer **-**Study owner **vnmr2**  
Operator **vnmr2**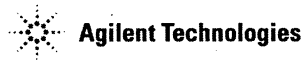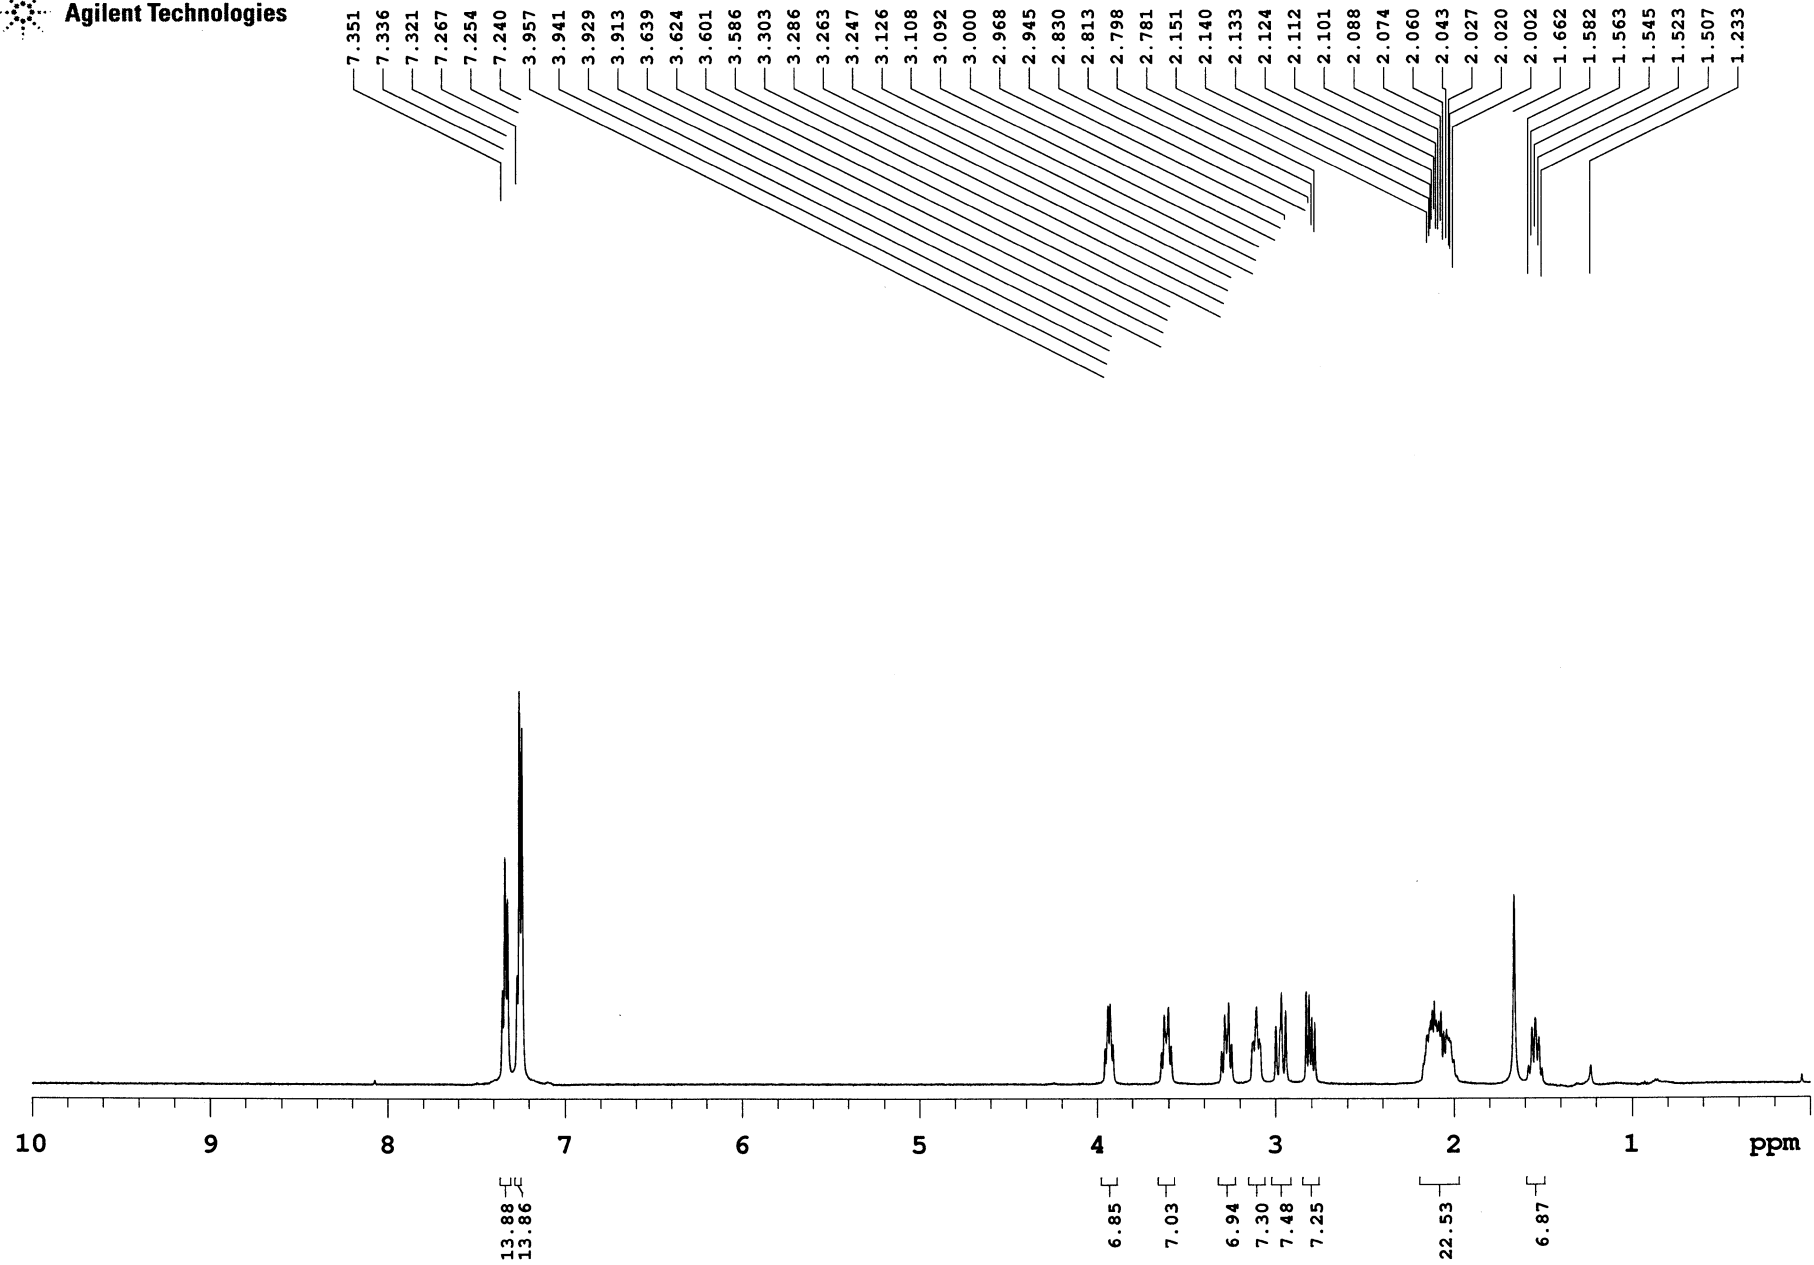

LCH-02-332

exp62 s2pul

```

SAMPLE
date Dec 4 2014 dfrq 499.833
solvent cdc13 dn H1
file exp dpwr 44
ACQUISITION dof 0
sfrq 125.696 dm vvy
tn C13 dmm w
at 1.000 dmf 9681
np 60332 dseq
sw 30165.9 dres 1.0
fb not used homo n
bs 4 PROCESSING
tpwr 58 lb 1.00
pw 4.8 wtfile
d1 1.000 proc ft
tof 1883.7 fn 131072
nt 3000 math f
ct 3000
alock y werr react
gain not used wexp procplot
FLAGS n wbs testsn
in n wnt wft
dp y
hs nn
DISPLAY
sp -0.2
wp 22622.6
vs 300
sc 0
wc 210
hzmm 107.73
is 33.57
rfl 10968.8
rfp 9677.5
th 7
ins 100.000
nm cdc ph

```

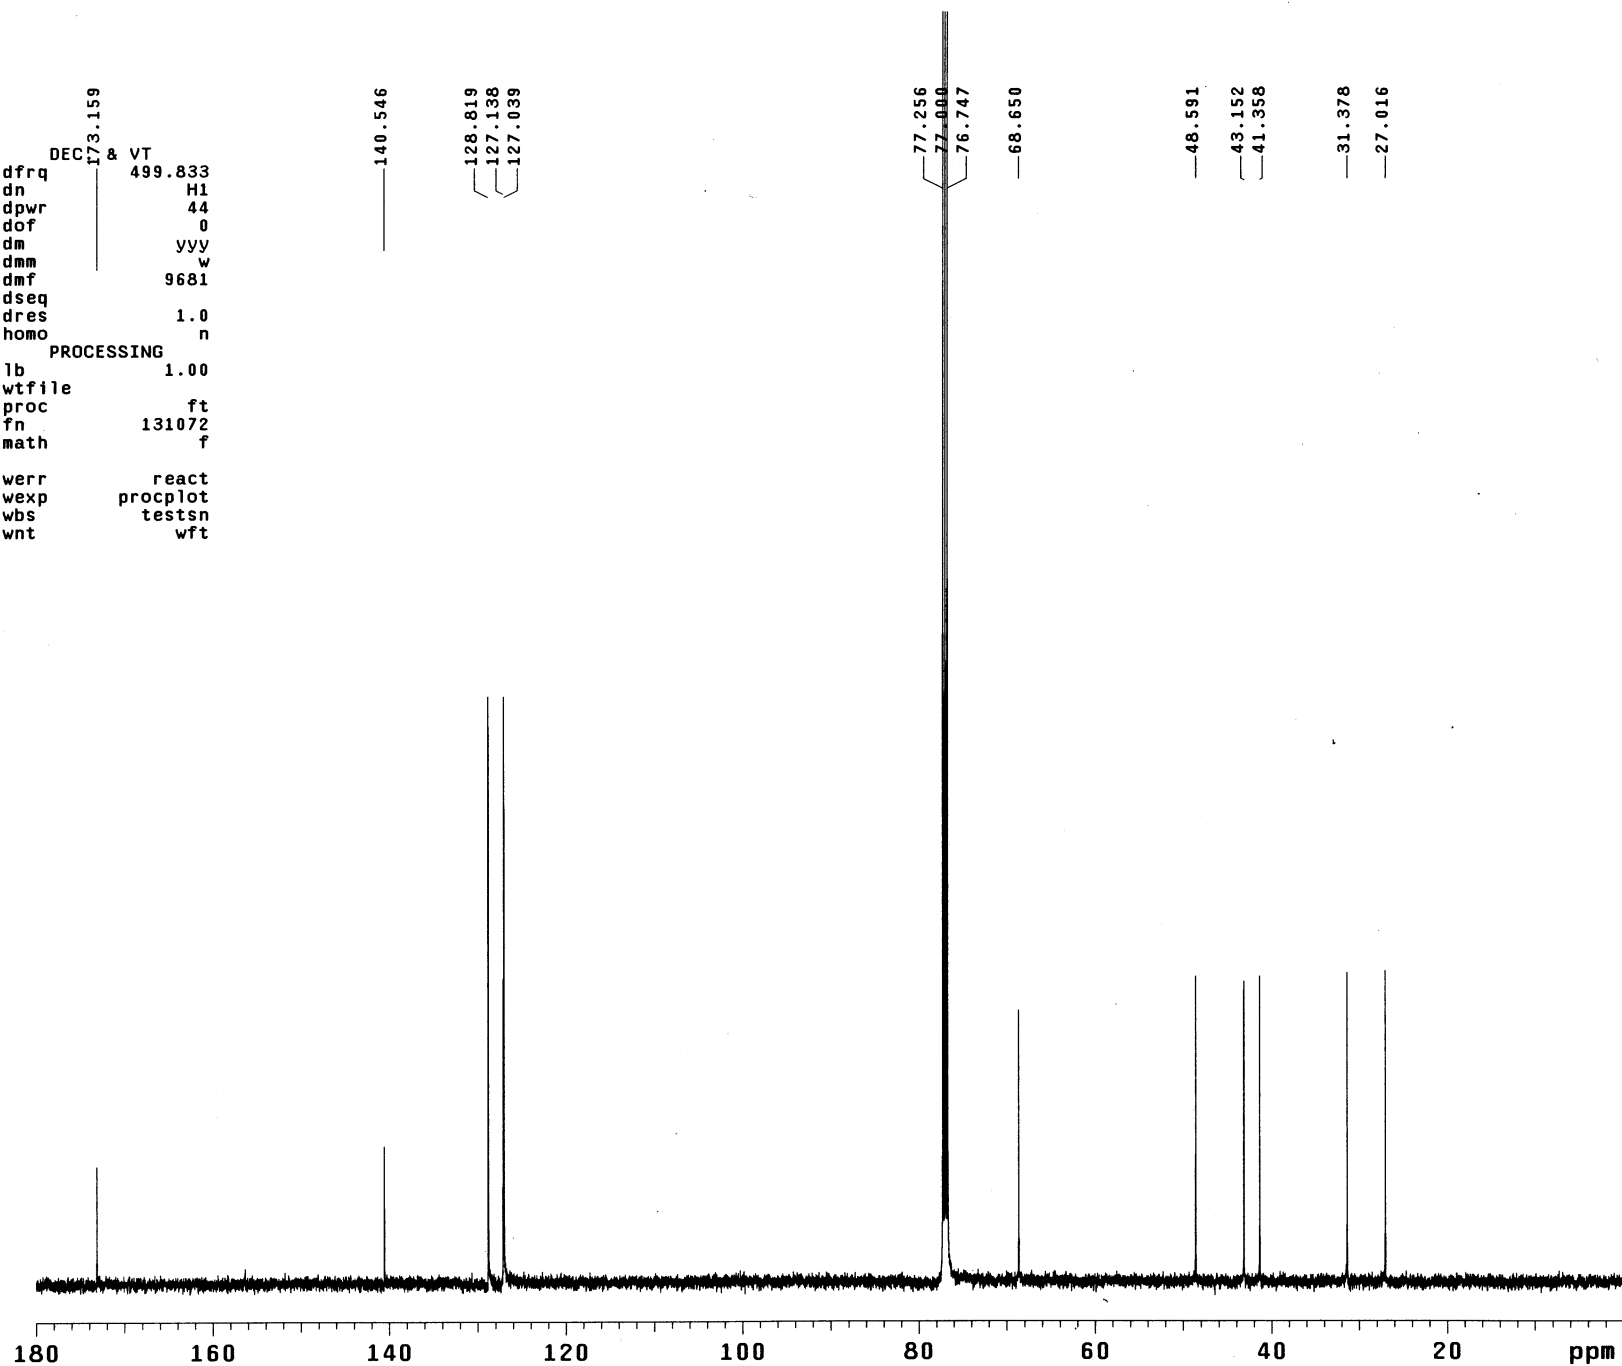Fig S126. <sup>13</sup>C NMR (CDCl<sub>3</sub>, 125 MHz) of compound syn-4a

Fig S127. DEPT of compound syn-4a

LCH-02-332

exp63 DEPT

|             |            |            |                    |          |
|-------------|------------|------------|--------------------|----------|
| SAMPLE      |            | DEPT       | ACQUISITION ARRAYS |          |
| date        | Dec 4 2014 | j1xh       | 140.0              | array    |
| solvent     | cdcl3      | mult       | arrayed            | mult     |
| sample      | undefined  | SPECIAL    |                    | arraydim |
| ACQUISITION |            | temp       | not used           | 1        |
| sw          | 30165.9    | gain       | 34                 | 0.5      |
| at          | 1.000      | spin       | 0                  | 2        |
| np          | 60332      | PROCESSING |                    | 3        |
| bs          | 4          | lb         | 1.00               | 1.5      |
| ss          | -4         | fn         | 131072             |          |
| d1          | 1.000      | SPECTRUM   |                    |          |
| nt          | 1500       | wp         | 22622.6            |          |
| ct          | 1500       | sp         | -0.2               |          |
| TRANSMITTER |            | rp         | 135.9              |          |
| tn          | C13        | lp         | 212.4              |          |
| tof         | 1883.7     | ai         | cdc ph             |          |
| tpwr        | 58         | REFERENCE  |                    |          |
| pw          | 13.800     | rfl        | 1291.8             |          |
| DECOUPLER   |            | rff        | 0                  |          |
| dn          | H1         | PLOT       |                    |          |
| dof         | 0          | wc         | 210                |          |
| dpwr        | 44         | sc         | 0                  |          |
| dm          | nyy        | vs         | 1300               |          |
| dmm         | ccw        | hzmm       | 107.73             |          |
| dmf         | 9681       | th         | 7                  |          |
| pp1v1       | 61         |            |                    |          |
| pp          | 14.800     |            |                    |          |

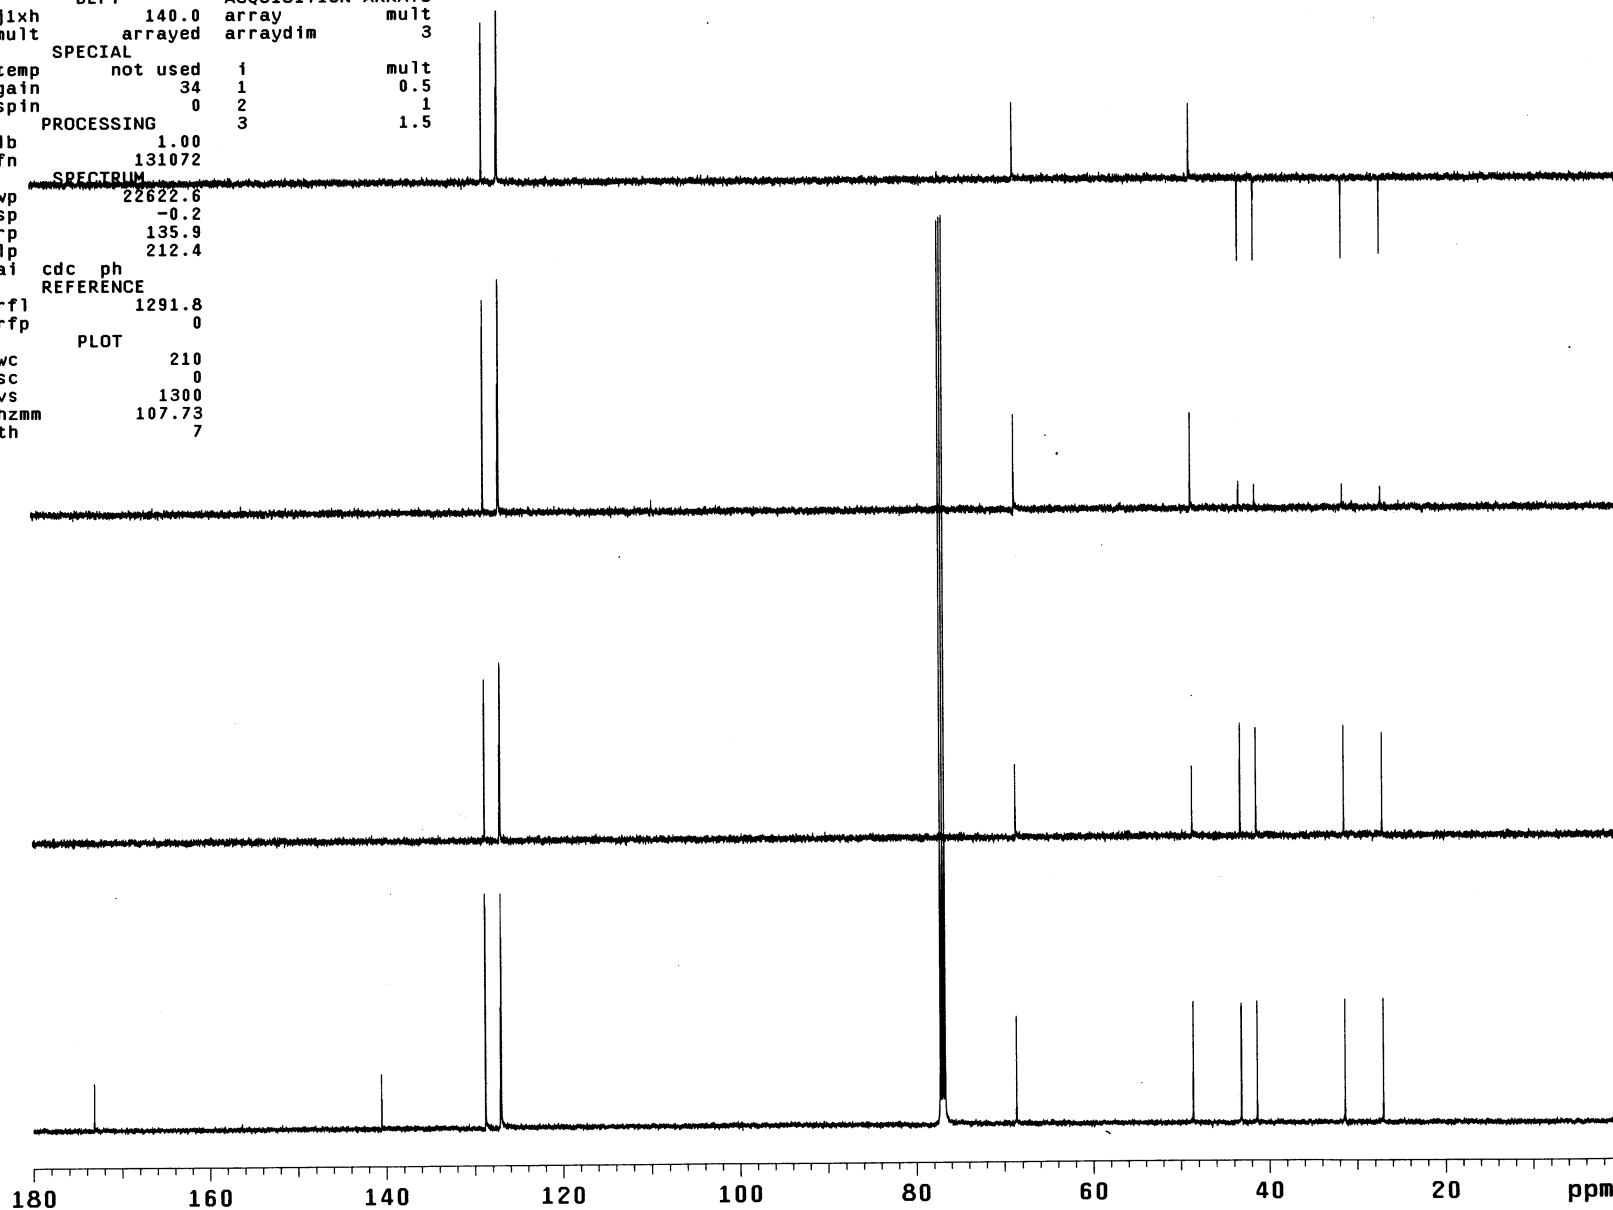

Fig S128. HSQC of compound syn-4a

LCH-02-332

exp66 gHSQC

| SAMPLE         |            | FLAGS         | ACQUISITION | ARRAYS |
|----------------|------------|---------------|-------------|--------|
| date           | Dec 4 2014 | hs            | n           | phase  |
| solvent        | cdcl3      | sspul         | y           | 256    |
| sample         | undefined  | PFGflg        |             |        |
| ACQUISITION    |            | hsglvi        | 1009        | phase  |
| sw             | 4001.6     | SPECIAL       | 1           | 1      |
| at             | 0.128      | temp          | not used    | 2      |
| np             | 1024       | gain          | 54          |        |
| fb             | not used   | spin          | 0           |        |
| ss             | 32         | GRADIENTS     |             |        |
| d1             | 1.000      | gzlv11        | 1009        |        |
| nt             | 8          | gt1           | 0.002000    |        |
| 2D ACQUISITION |            | gzlv13        | 507         |        |
| sw1            | 21367.5    | gt3           | 0.001000    |        |
| ni             | 128        | gstab         | 0.000500    |        |
| phase          | arrayed    | F2 PROCESSING |             |        |
| TRANSMITTER    |            | gf            | 0.059       |        |
| tn             | H1         | gfs           | not used    |        |
| sfrq           | 499.832    | fn            | 1024        |        |
| tof            | -499.9     | F1 PROCESSING |             |        |
| tpwr           | 61         | gf1           | 0.006       |        |
| pw             | 13.900     | gfs1          | not used    |        |
| DECOUPLER      |            | procl         | lp          |        |
| dn             | C13        | fn1           | 2048        |        |
| dof            | -2515.1    | DISPLAY       |             |        |
| dm             | nny        | sp            | 688.7       |        |
| dmm            | ccp        | wp            | 3079.4      |        |
| dmf            | 32258      | sp1           | 3072.1      |        |
| dpwr           | 42         | wp1           | 13459.0     |        |
| pwxlvl         | 60         | rf1           | 1653.5      |        |
| pw             | 10.700     | rfp           | 1630.9      |        |
| HSQC           |            | rf11          | 7417.0      |        |
| j1xh           | 140.0      | rfp1          | 6107.0      |        |
| nullflg        | y          | PLOT          |             |        |
| mult           | 2          | wc            | 150.0       |        |
|                |            | sc            | 6.2         |        |
|                |            | wc2           | 116.2       |        |
|                |            | sc2           | 0           |        |
|                |            | vs            | 133         |        |
|                |            | th            | 6           |        |
|                |            | ai            | cdc         | ph     |

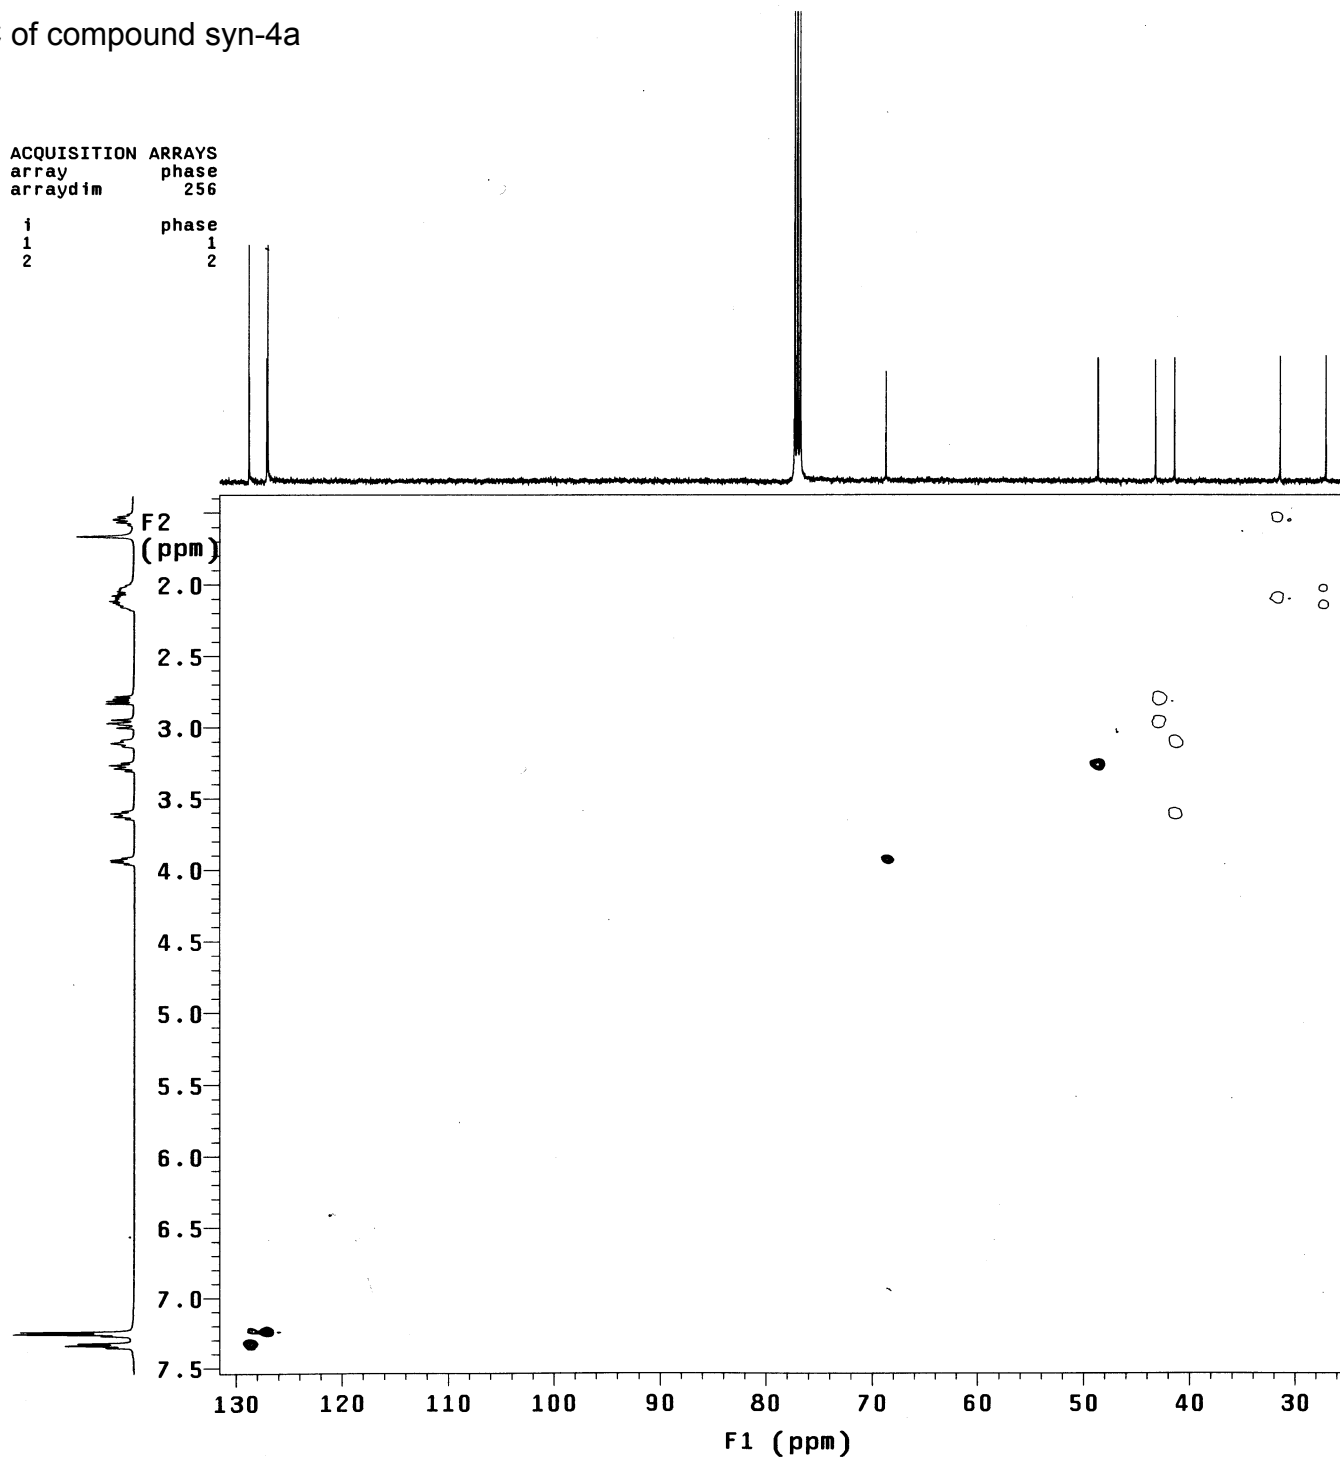

Fig S129. COSY of compound syn-4a

LCH-02-332

exp64 gCOSY

|                |            |               |          |
|----------------|------------|---------------|----------|
| SAMPLE         |            | FLAGS         |          |
| date           | Dec 4 2014 | hs            | nn       |
| solvent        | cdc13      | sspul         | n        |
| sample         | undefined  | hsglv1        | 1009     |
| ACQUISITION    |            | SPECIAL       |          |
| sw             | 4001.6     | temp          | not used |
| at             | 0.128      | gain          | 34       |
| np             | 1024       | spin          | 0        |
| fb             | not used   | F2 PROCESSING |          |
| ss             | 16         | sb            | -0.064   |
| d1             | 1.000      | sbs           | not used |
| nt             | 8          | fn            | 1024     |
| 2D ACQUISITION |            | F1 PROCESSING |          |
| sw1            | 4001.6     | sb1           | -0.032   |
| ni             | 128        | sbs1          | not used |
| TRANSMITTER    |            | proc1         | lp       |
| tn             | H1         | fn1           | 1024     |
| sfrq           | 499.832    | DISPLAY       |          |
| tof            | -499.9     | sp            | 334.2    |
| tpwr           | 61         | wp            | 3517.0   |
| pw             | 13.900     | sp1           | 334.3    |
| GRADIENTS      |            | wp1           | 3517.0   |
| gzlv11         | 1009       | rf1           | 848.3    |
| gt1            | 0.001000   | rfp           | 830.7    |
| gstab          | 0.000500   | rf11          | 848.1    |
| DECOUPLER      |            | rfp1          | 830.7    |
| dn             | C13        | PLOT          |          |
| dm             | nnn        | wc            | 155.0    |
|                |            | sc            | 10.0     |
|                |            | wc2           | 155.0    |
|                |            | sc2           | 0        |
|                |            | vs            | 133      |
|                |            | th            | 9        |
|                |            | ai            | cdc av   |

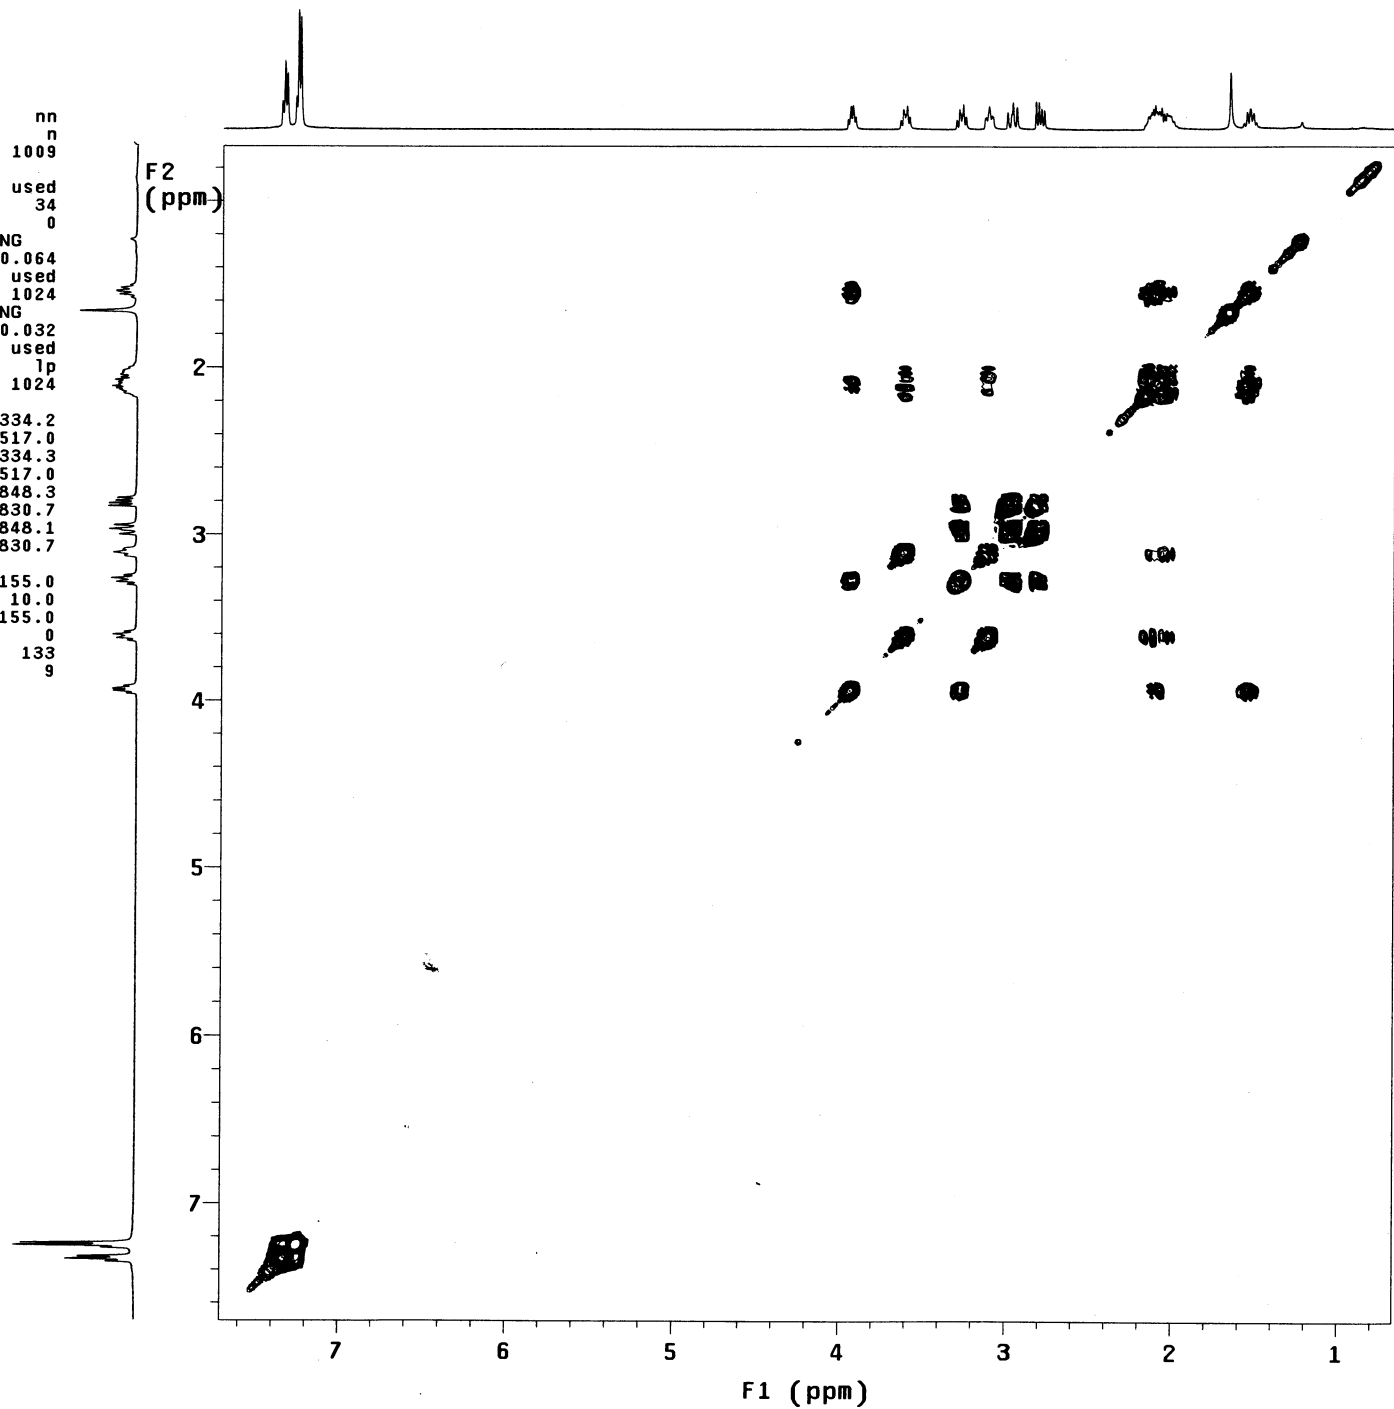

Fig S130. NOESY of compound syn-4a

LCH-02-332

exp65 NOESY

| SAMPLE         |            | FLAGS         |          |
|----------------|------------|---------------|----------|
| date           | Dec 4 2014 | hs            | n        |
| solvent        | cdcl3      | sspul         | y        |
| sample         | undefined  | PFgflg        | y        |
| ACQUISITION    |            | hsglv1        | 1009     |
| sw             | 4001.6     | SPECIAL       |          |
| at             | 0.128      | temp          | not used |
| np             | 1024       | gain          | 34       |
| fb             | not used   | spin          | 0        |
| ss             | 32         | F2 PROCESSING |          |
| d1             | 1.000      | gf            | 0.059    |
| nt             | 16         | gfs           | not used |
| 2D ACQUISITION |            | fn            | 1024     |
| sw1            | 4001.6     | F1 PROCESSING |          |
| ni             | 200        | gf1           | 0.046    |
| TRANSMITTER    |            | gfs1          | not used |
| tn             | H1         | proc1         | lp       |
| sfrq           | 499.832    | fn1           | 1024     |
| tof            | -499.9     | DISPLAY       |          |
| tpwr           | 61         | sp            | 279.9    |
| pw             | 13.900     | wp            | 3571.7   |
| NOESY          |            | sp1           | 279.8    |
| mix            | 0.600      | wp1           | 3563.9   |
| PRESATURATION  |            | rf1           | 847.8    |
| satmode        | nnnn       | rff           | 830.7    |
| satpwr         | 0          | rfl1          | 847.9    |
| satdly         | 0          | rff1          | 830.7    |
| satfrq         | 0          | PLOT          |          |
| DECOUPLER      |            | wc            | 155.0    |
| dn             | C13        | sc            | 10.0     |
| dm             | nnn        | wc2           | 155.0    |
|                |            | sc2           | 0        |
|                |            | vs            | 133      |
|                |            | th            | 2        |
|                |            | ai            | ph       |

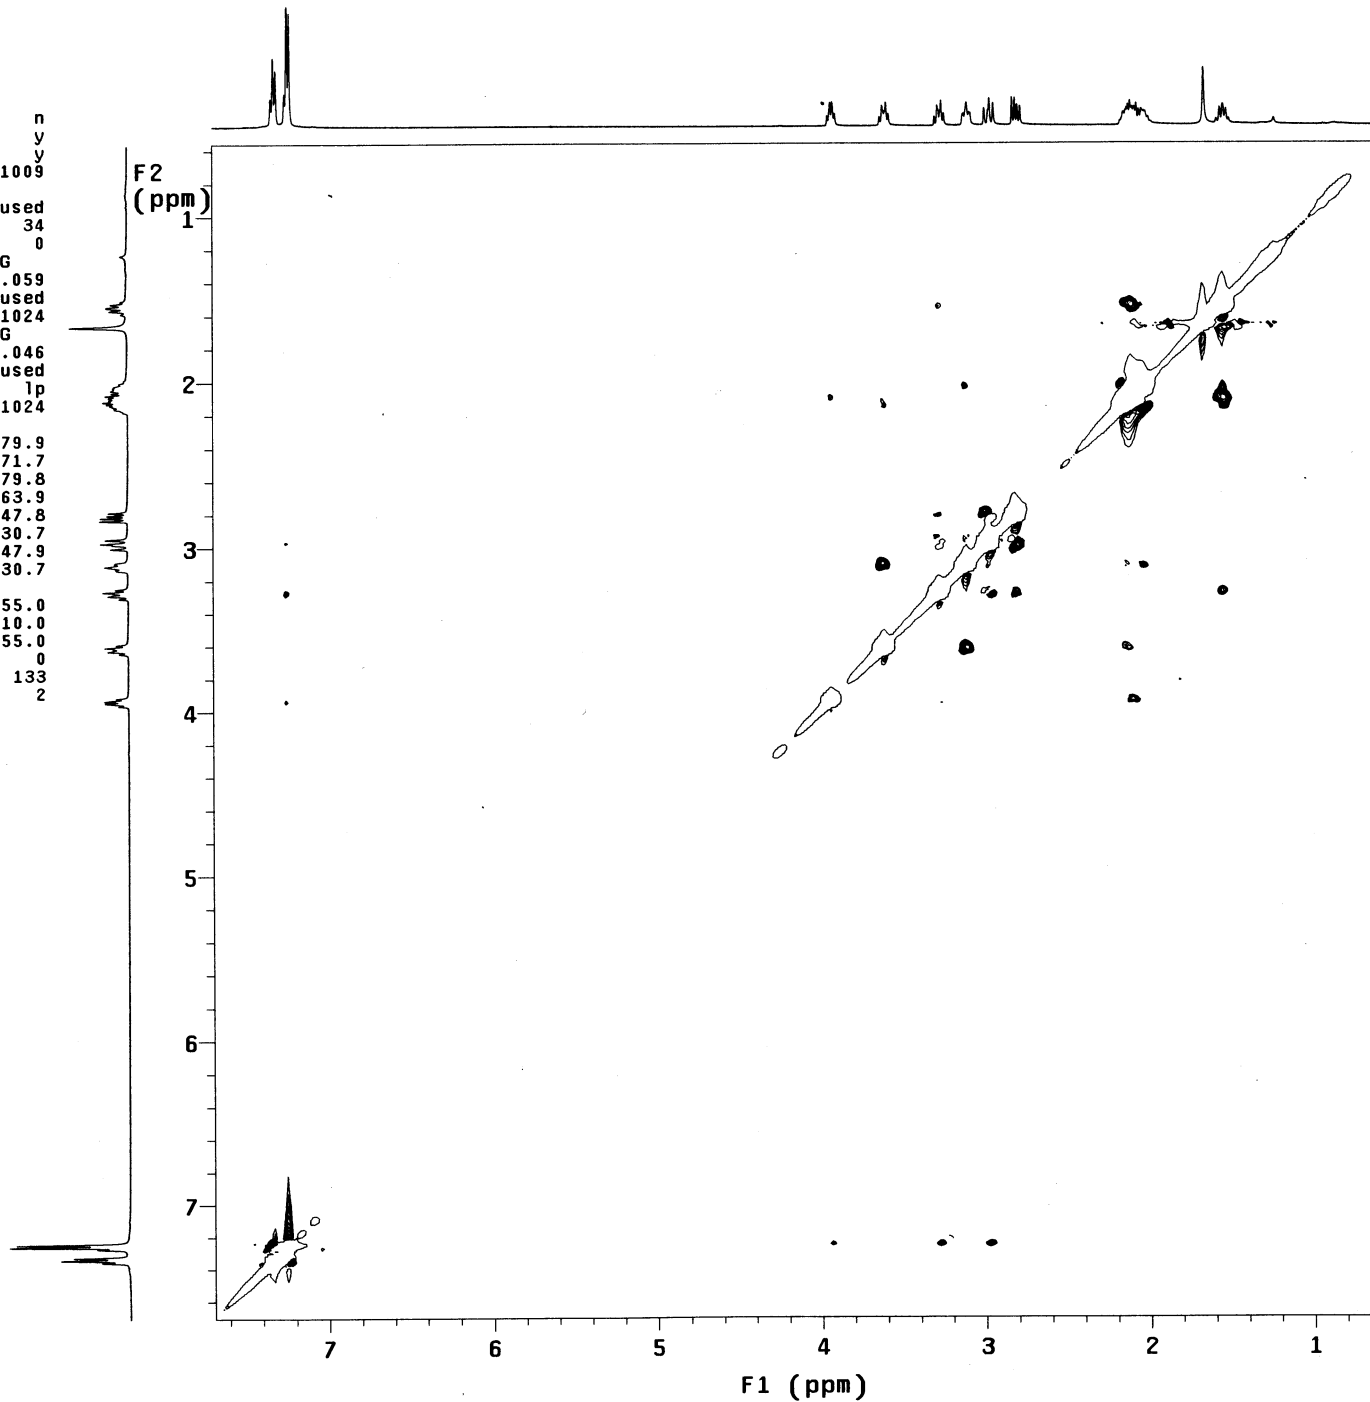

LCH-02-392

exp40 s2pul

```

SAMPLE
date Mar 20 2015 dfrq 125.694
solvent cdcl3 dn C13
file exp dpwr 30
ACQUISITION dof 0
sfrq 499.833 dm nnn
tn H1 dmm c
at 3.000 dmf 200
np 48000 dseq
sw 8000.0 dres 1.0
fb not used homo n
bs 4
tpwr 62 wtfile
pw 4.8 proc ft
d1 1.000 fn not used
tof 499.7 math f
nt 4
ct 4 werr react
alock y wexp procplot
gain not used wbs
FLAGS wnt
il n
in n
dp y
hs nn
DISPLAY
sp -0.1
wp 5997.8
vs 80
sc 0
wc 210
hzmm 28.56
is 0.00
rfl 4635.7
rfp 3618.8
th 8
ins 100.000
nm cdc ph

```

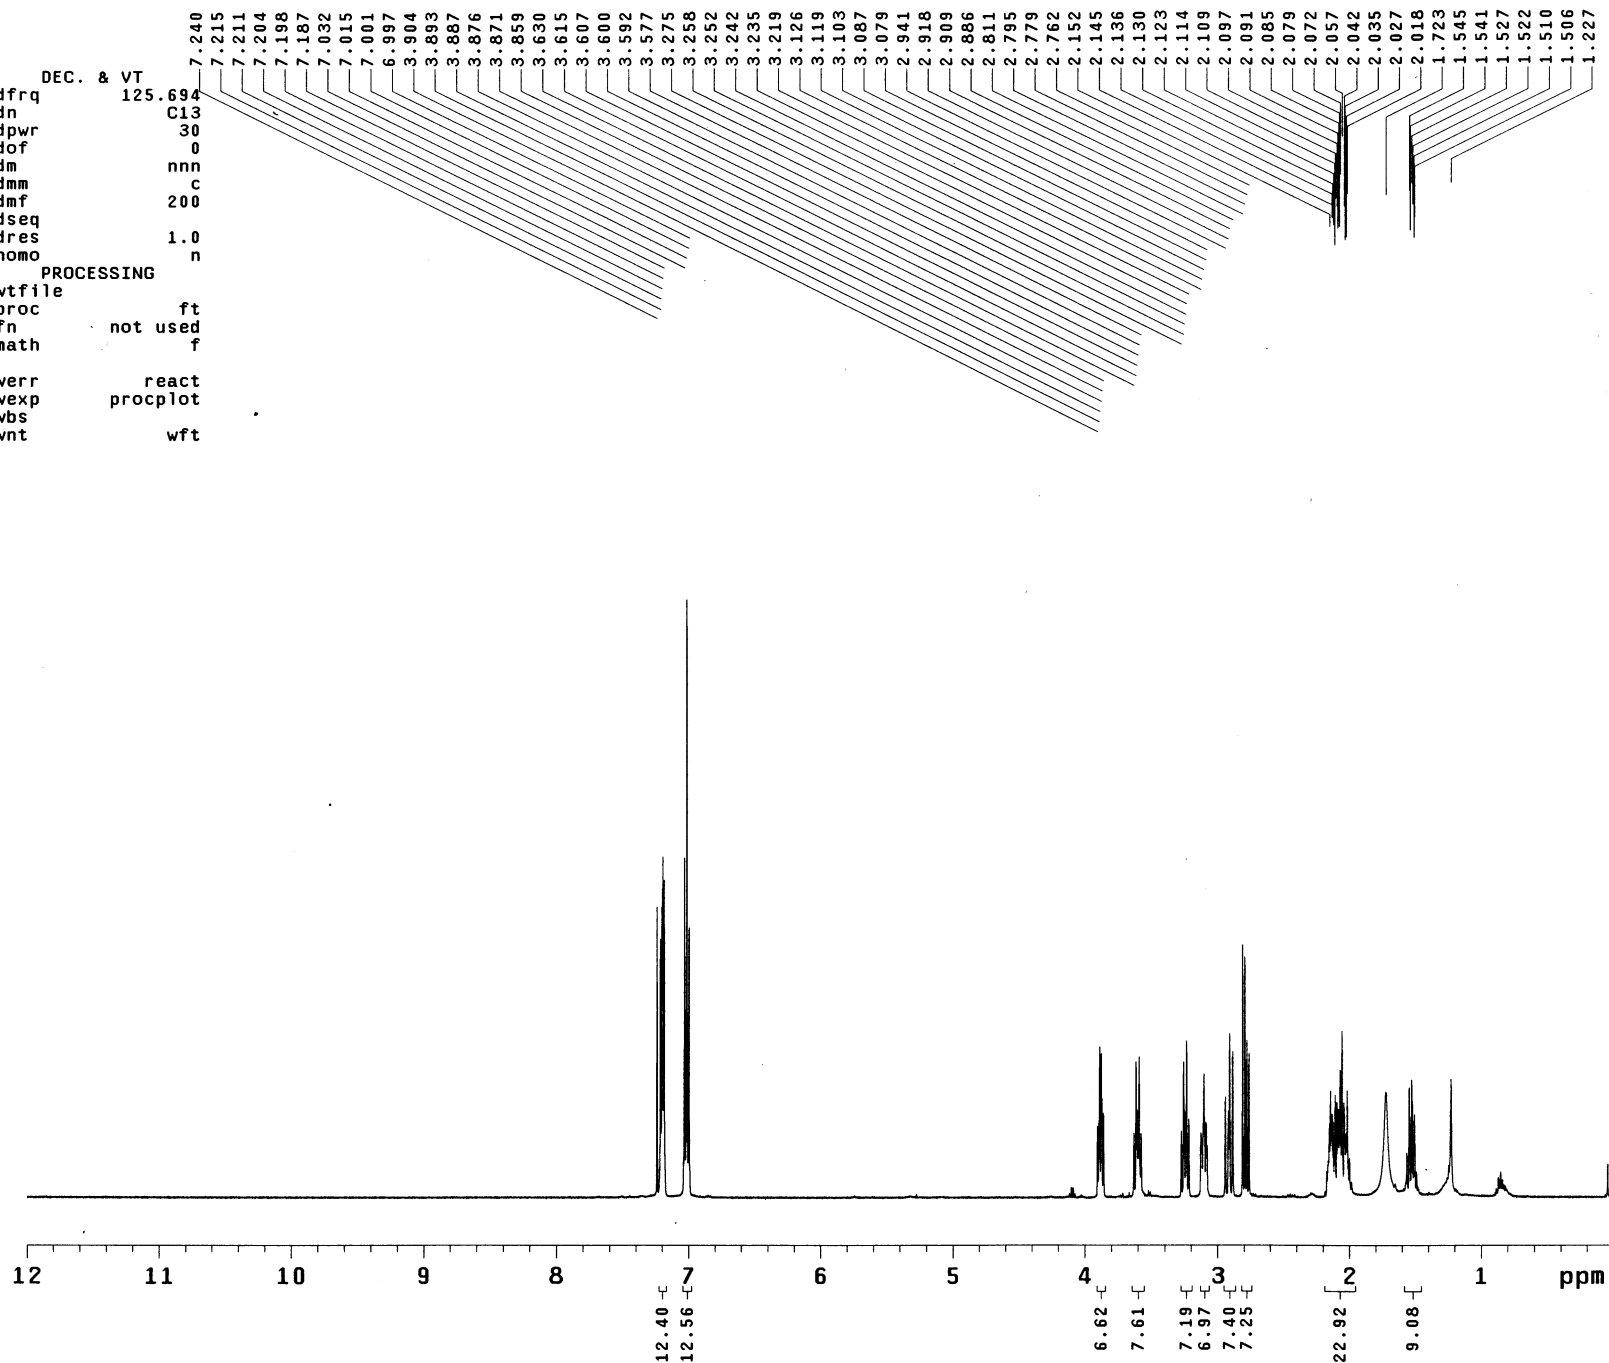Fig S131.  $^1\text{H}$  NMR ( $\text{CDCl}_3$ , 500 MHz) of compound syn-4b

LCH-02-392

exp41 s2pu1

| SAMPLE      |             | DEC. & VT |          |
|-------------|-------------|-----------|----------|
| date        | Mar 20 2015 | dfrq      | 499.833  |
| solvent     | cdc13       | dn        | H1       |
| file        | exp         | dpwr      | 44       |
| ACQUISITION |             |           |          |
| sfrq        | 125.696     | dof       | 0        |
| tn          | C13         | dm        | yyv      |
| at          | 1.000       | dmm       | w        |
| np          | 60332       | dmf       | 8868     |
| sw          | 30165.9     | dseq      |          |
| fb          | not used    | dres      | 1.0      |
| bs          | 4           | homo      | n        |
| PROCESSING  |             |           |          |
| tpwr        | 59          | lb        | 1.00     |
| pw          | 4.8         | wtfile    |          |
| dl          | 1.000       | proc      | ft       |
| tof         | 1883.7      | fn        | 131072   |
| nt          | 4000        | math      | f        |
| ct          | 4000        |           |          |
| alock       | not used    | werr      | react    |
| gain        | not used    | wexp      | procplot |
| FLAGS       |             |           |          |
| il          | n           | wbs       | testsn   |
| in          | n           | wnt       | wft      |
| dp          | y           |           |          |
| hs          | nn          |           |          |
| DISPLAY     |             |           |          |
| sp          | -0.2        |           |          |
| wp          | 27649.9     |           |          |
| vs          | 459         |           |          |
| sc          | 0           |           |          |
| wc          | 210         |           |          |
| hzmm        | 131.67      |           |          |
| is          | 33.57       |           |          |
| rfl         | 10969.3     |           |          |
| rfp         | 9677.5      |           |          |
| th          | 7           |           |          |
| ins         | 100.000     |           |          |
| nm          | cdc ph      |           |          |

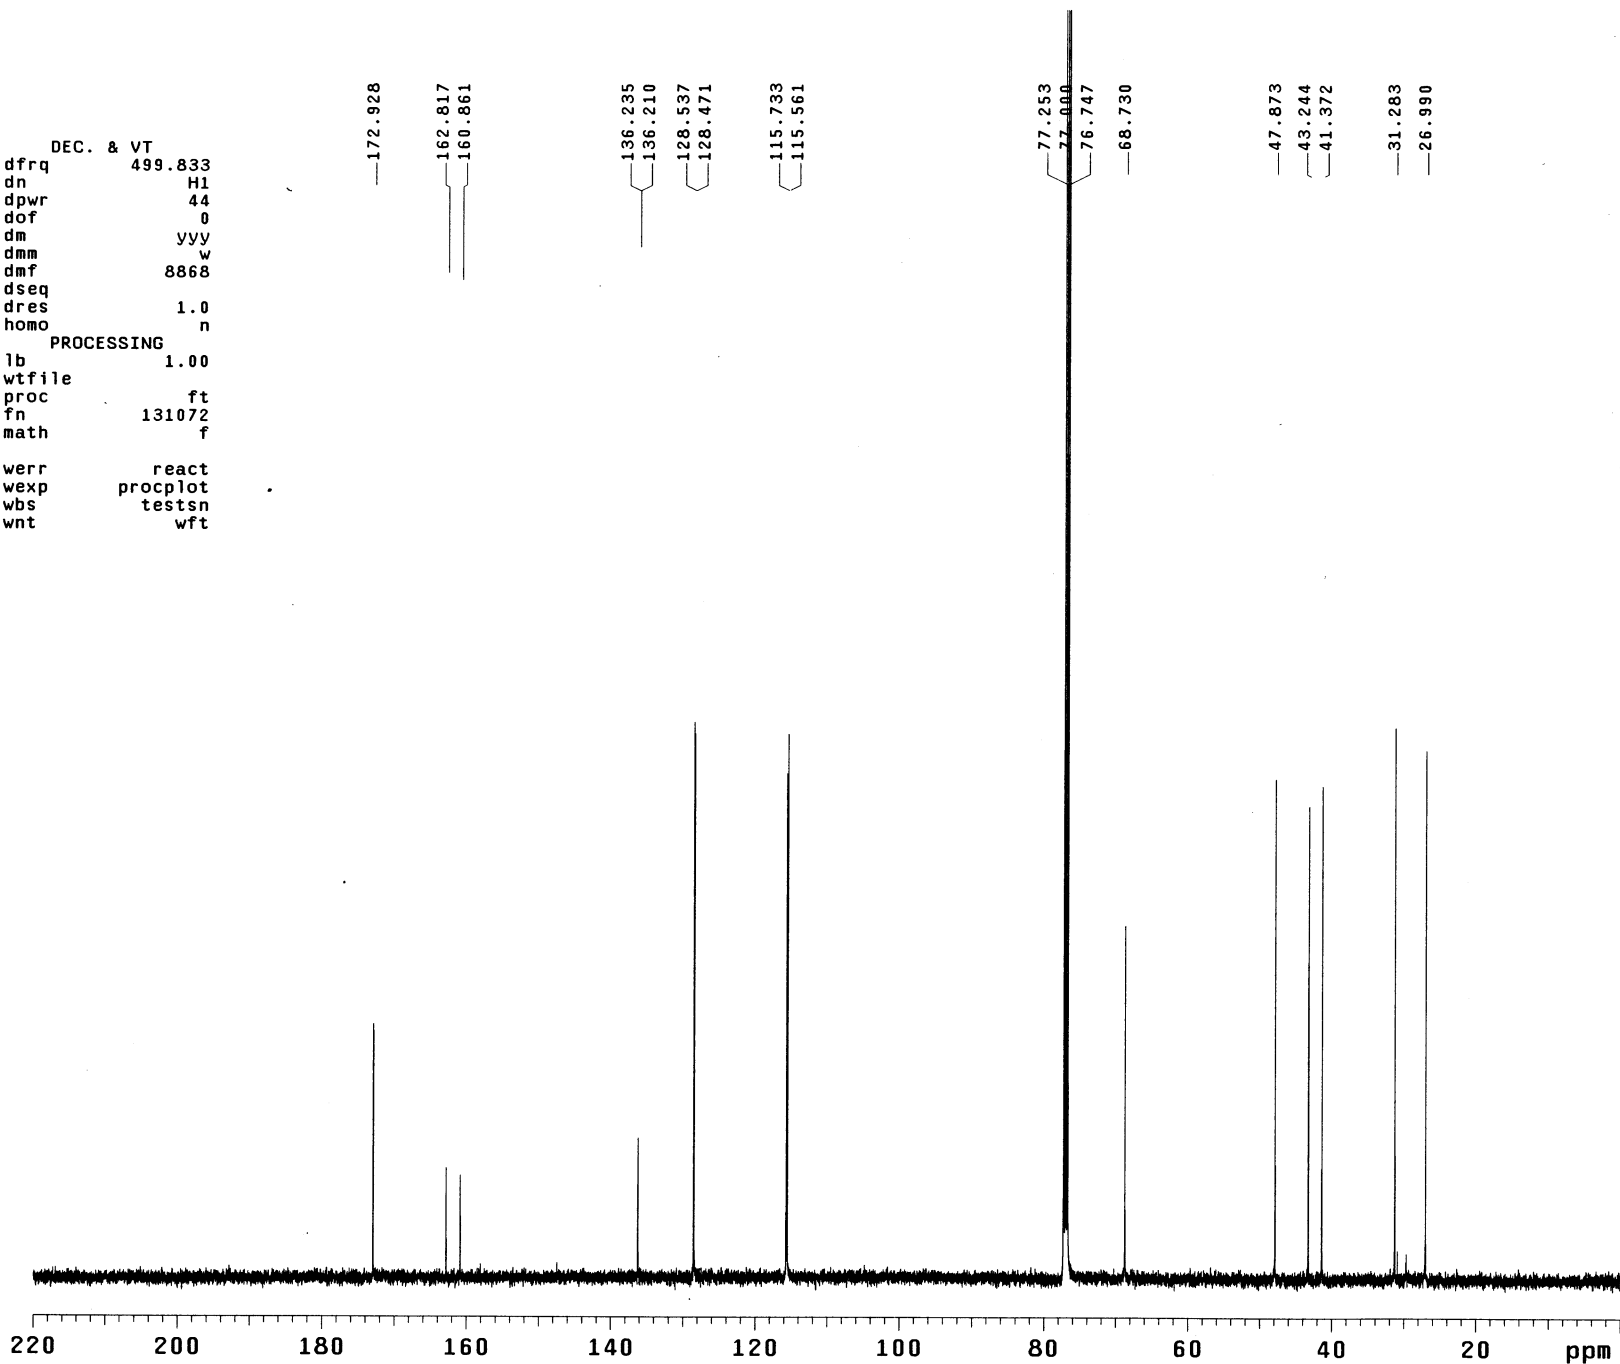Fig S132. <sup>13</sup>C NMR (CDCl<sub>3</sub>, 125 MHz) of compound syn-4b



LCH-02-392

exp42 DEPT

|             |             |               |                    |
|-------------|-------------|---------------|--------------------|
| SAMPLE      |             | DEPT          | ACQUISITION ARRAYS |
| date        | Mar 20 2015 | j1xh 140.0    | array mult         |
| solvent     | cdc13       | mult arrayed  | arraydim 3         |
| sample      | undefined   | SPECIAL       |                    |
| ACQUISITION |             | temp not used | 1 mult             |
| sw          | 30165.9     | gain 34       | 1 0.5              |
| at          | 1.000       | spin 0        | 2 1                |
| np          | 60332       | PROCESSING    | 3 1.5              |
| bs          | 4           | lb 1.00       |                    |
| ss          | -4          | fn 131072     |                    |
| d1          | 1.000       | SPECTRUM      |                    |
| nt          | 2000        | wp 27649.9    |                    |
| ct          | 2000        | sp -0.2       |                    |
| TRANSMITTER |             | rp 6.7        |                    |
| tn          | C13         | lp 272.2      |                    |
| tof         | 1883.7      | ai cdc ph     |                    |
| tpwr        | 59          | REFERENCE     |                    |
| pw          | 14.700      | rfl 1291.8    |                    |
| DECOUPLER   |             | rfp 0         |                    |
| dn          | H1          | PLOT          |                    |
| dof         | 0           | wc 210        |                    |
| dpwr        | 44          | sc 0          |                    |
| dm          | nny         | vs 25000      |                    |
| dmm         | ccw         | hzmm 131.67   |                    |
| dmf         | 8868        | th 7          |                    |
| pp1v1       | 59          |               |                    |
| pp          | 21.200      |               |                    |

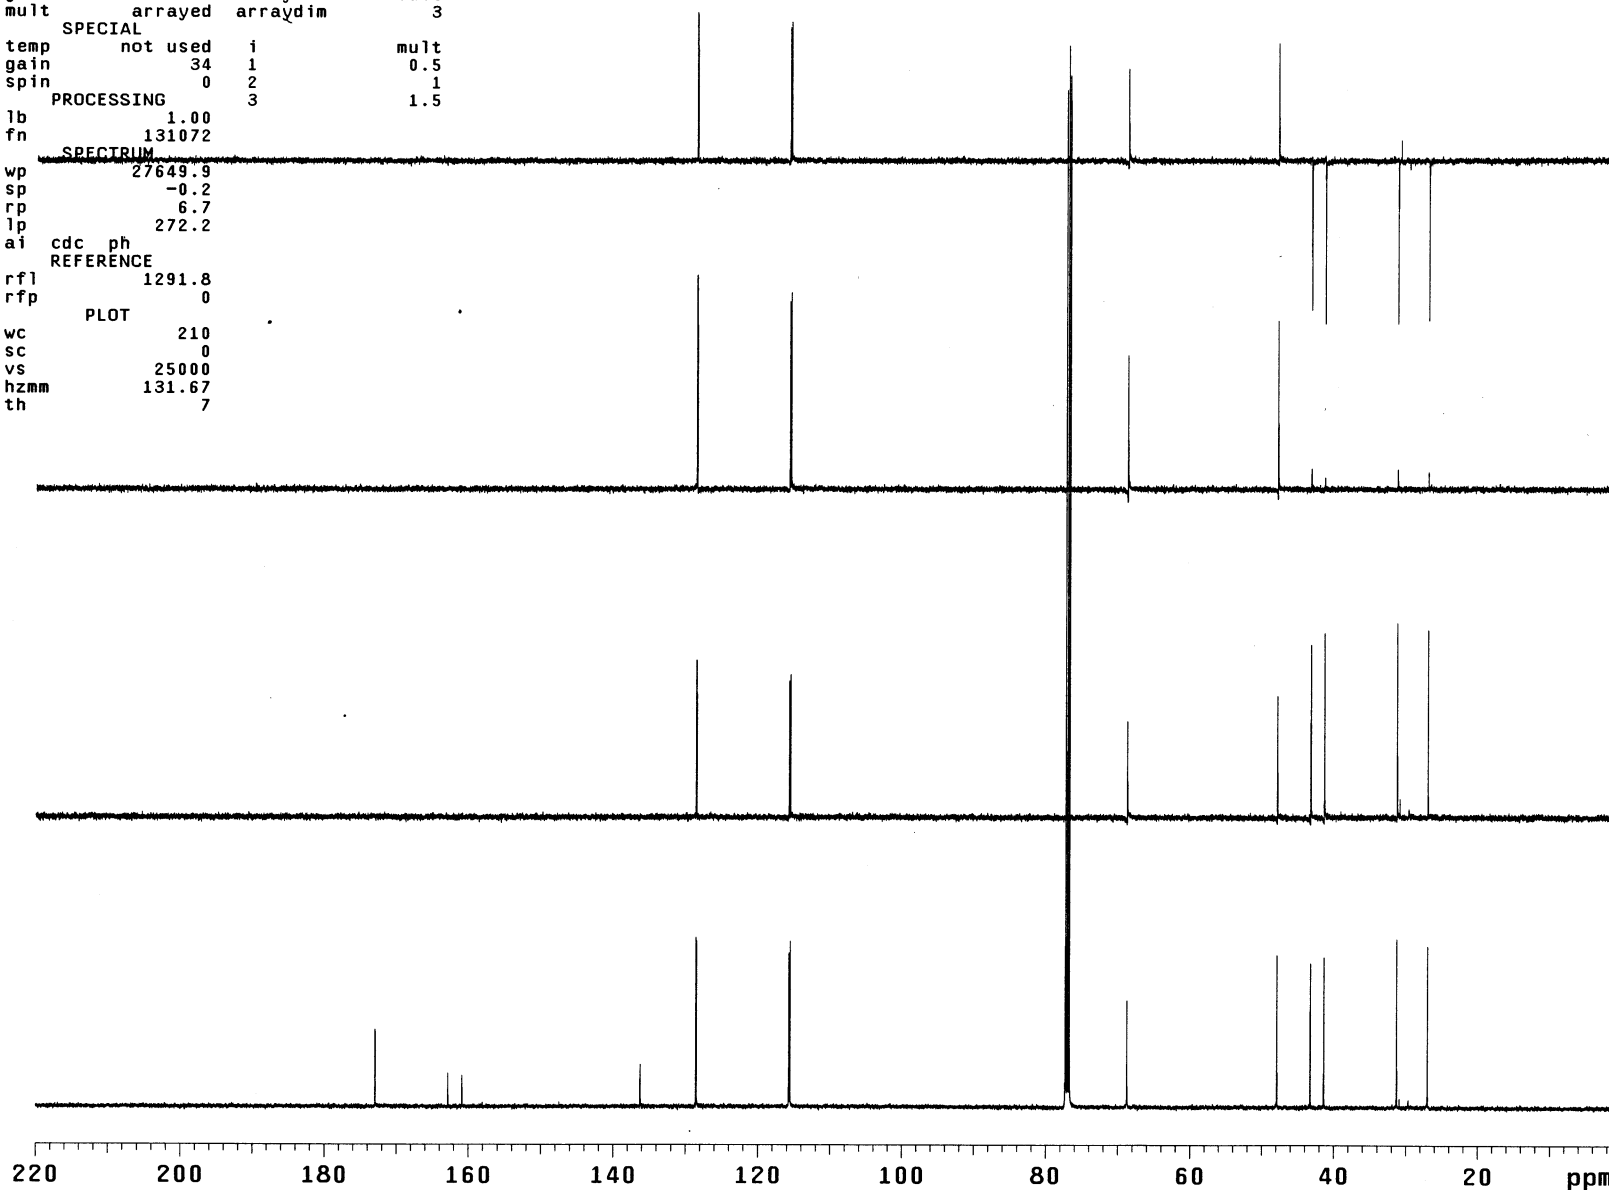

Fig S133. DEPT of compound syn-4b

Fig S134. HSQC of compound syn-4b

LCH-02-392

exp45 gHSQC

| SAMPLE           | FLAGS         | ACQUISITION | ARRAYS       |
|------------------|---------------|-------------|--------------|
| date Mar 20 2015 | hs            | n           | array phase  |
| solvent cdcl3    | sspul         | y           | arraydim 256 |
| sample undefined | PFGflg        | y           |              |
| ACQUISITION      | hsglv1        | 1004        | phase        |
| sw 4001.6        | SPECIAL       | 1           | 1            |
| at 0.128         | temp          | not used    | 2            |
| np 1024          | gain          | 54          |              |
| fb not used      | spin          | 0           |              |
| ss 32            | GRADIENTS     |             |              |
| d1 1.000         | gzlv11        | 1004        |              |
| nt 8             | gt1           | 0.002000    |              |
| 2D ACQUISITION   | gzlv13        | 505         |              |
| sw1 21367.5      | gt3           | 0.001000    |              |
| ni 128           | gstab         | 0.000500    |              |
| phase arrayed    | F2 PROCESSING |             |              |
| TRANSMITTER      | gf            | 0.059       |              |
| tn H1            | gfs           | not used    |              |
| sfrq 499.832     | fn            | 1024        |              |
| tof -499.9       | F1 PROCESSING |             |              |
| tpwr 62          | gf1           | 0.006       |              |
| pw 13.800        | gfs1          | not used    |              |
| DECOUPLER        | procl         | lp          |              |
| dn C13           | fn1           | 2048        |              |
| dof -2515.1      | DISPLAY       |             |              |
| dm nny           | sp            | 643.6       |              |
| dmm ccp          | wp            | 3118.4      |              |
| dmf 32258        | sp1           | 3180.2      |              |
| dpwr 43          | wp1           | 13375.6     |              |
| pwxlvl 61        | rfl           | 3527.0      |              |
| pxw 11.000       | rfp           | 3506.3      |              |
| HSQC             | rfl1          | 15830.9     |              |
| j1xh 140.0       | rfp1          | 14545.6     |              |
| nullflg y        | PLOT          |             |              |
| mult 2           | wc            | 150.0       |              |
|                  | sc            | 6.2         |              |
|                  | wc2           | 116.2       |              |
|                  | sc2           | 0           |              |
|                  | vs            | 241         |              |
|                  | th            | 6           |              |
|                  | ai cdc ph     |             |              |

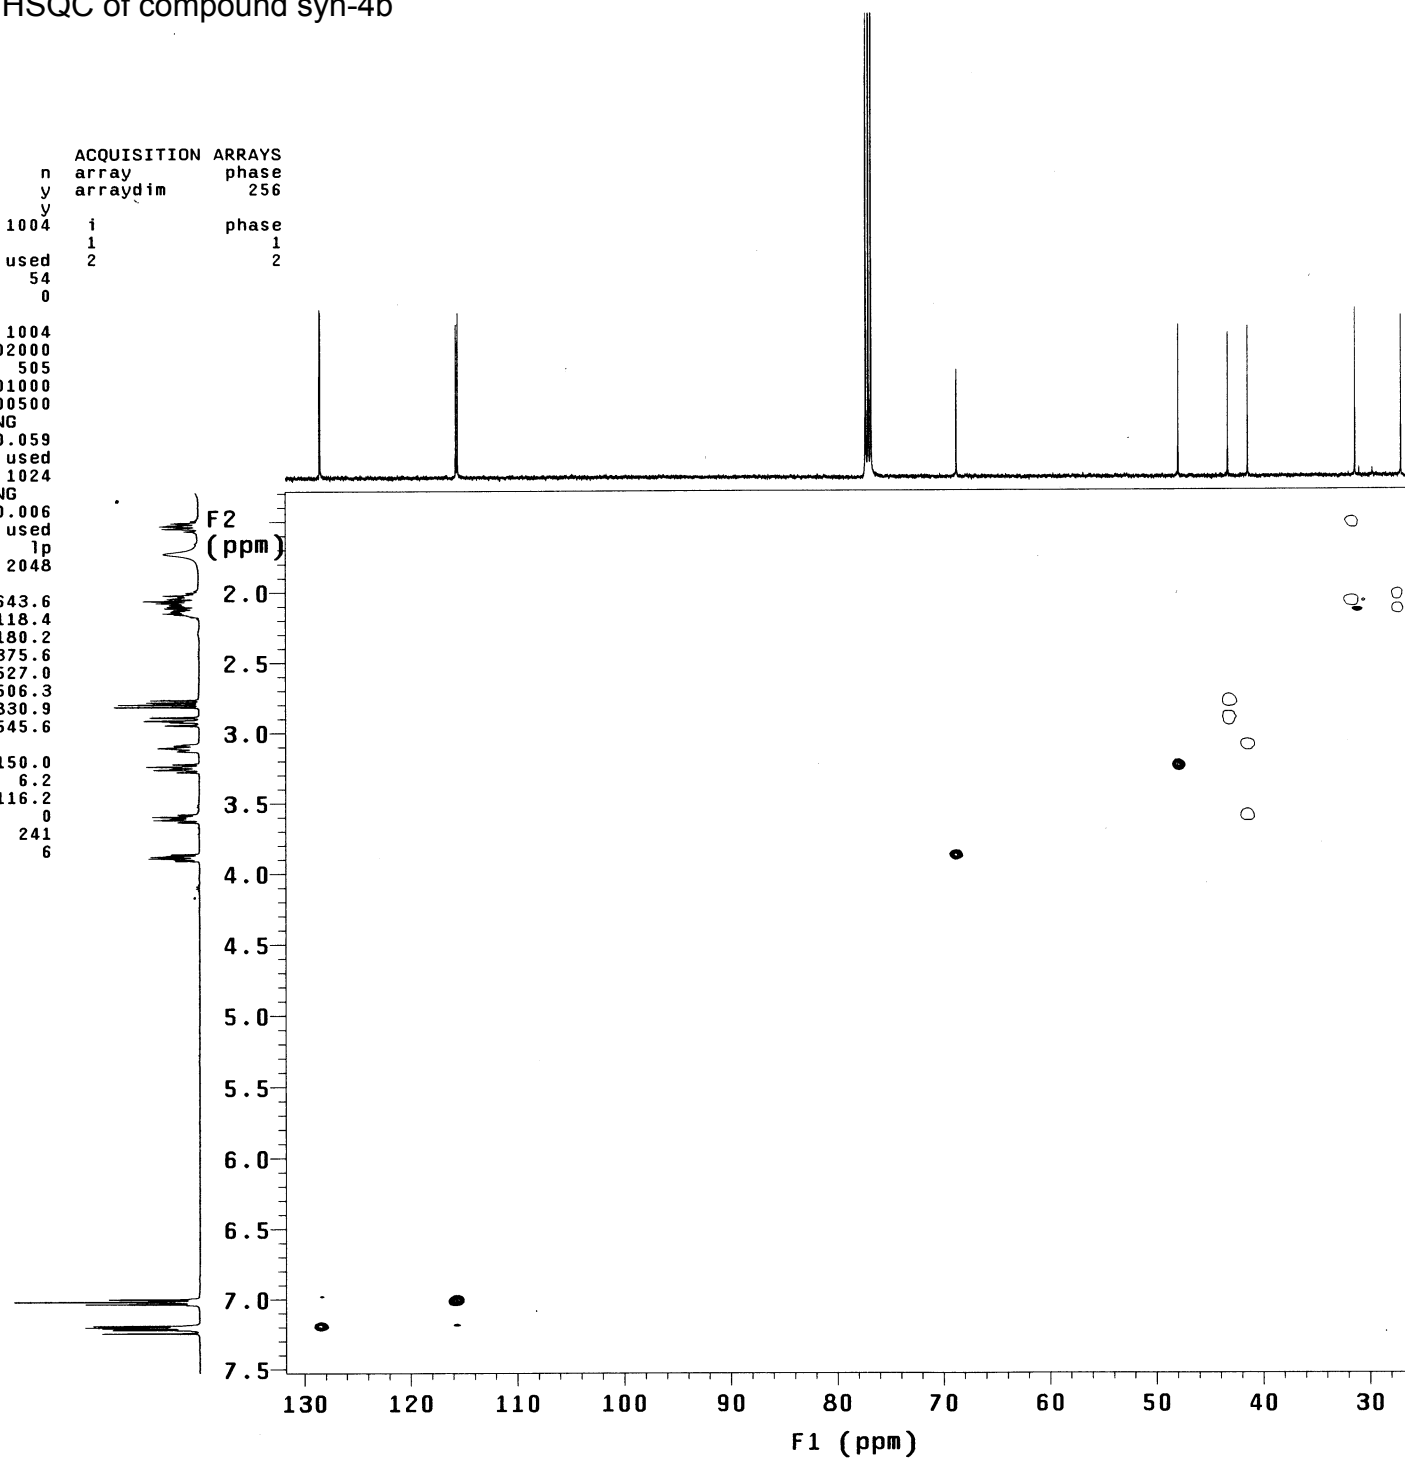

LCH-02-392

exp43 gCOSY

| SAMPLE         |             | FLAGS         |          |
|----------------|-------------|---------------|----------|
| date           | Mar 20 2015 | hs            | nn       |
| solvent        | cdc13       | sspul         | n        |
| sample         | undefined   | hsglv1        | 1004     |
| ACQUISITION    |             | SPECIAL       |          |
| sw             | 4001.6      | temp          | not used |
| at             | 0.128       | gain          | 34       |
| np             | 1024        | spin          | 0        |
| fb             | not used    | F2 PROCESSING |          |
| ss             | 16          | sb            | -0.064   |
| d1             | 1.000       | sbs           | not used |
| nt             | 8           | fn            | 1024     |
| 2D ACQUISITION |             | F1 PROCESSING |          |
| sw1            | 4001.6      | sb1           | -0.032   |
| n1             | 128         | sbs1          | not used |
| TRANSMITTER    |             | DISPLAY       |          |
| tn             | H1          | fn1           | 1024     |
| sfrq           | 499.832     | sp            | 351.2    |
| tof            | -499.9      | wp            | 3306.0   |
| tpwr           | 62          | sp1           | 352.6    |
| pw             | 13.800      | wp1           | 3306.0   |
| GRADIENTS      |             | rf1           | 3530.2   |
| gzlv11         | 1004        | rff           | 3506.3   |
| gt1            | 0.001000    | rfl1          | 3528.8   |
| gstab          | 0.000500    | rff1          | 3506.3   |
| DECOUPLER      |             | PLOT          |          |
| dn             | C13         | wc            | 155.0    |
| dm             | nnn         | sc            | 10.0     |
|                |             | wc2           | 155.0    |
|                |             | sc2           | 0        |
|                |             | vs            | 241      |
|                |             | th            | 8        |
|                |             | ai            | cdc av   |

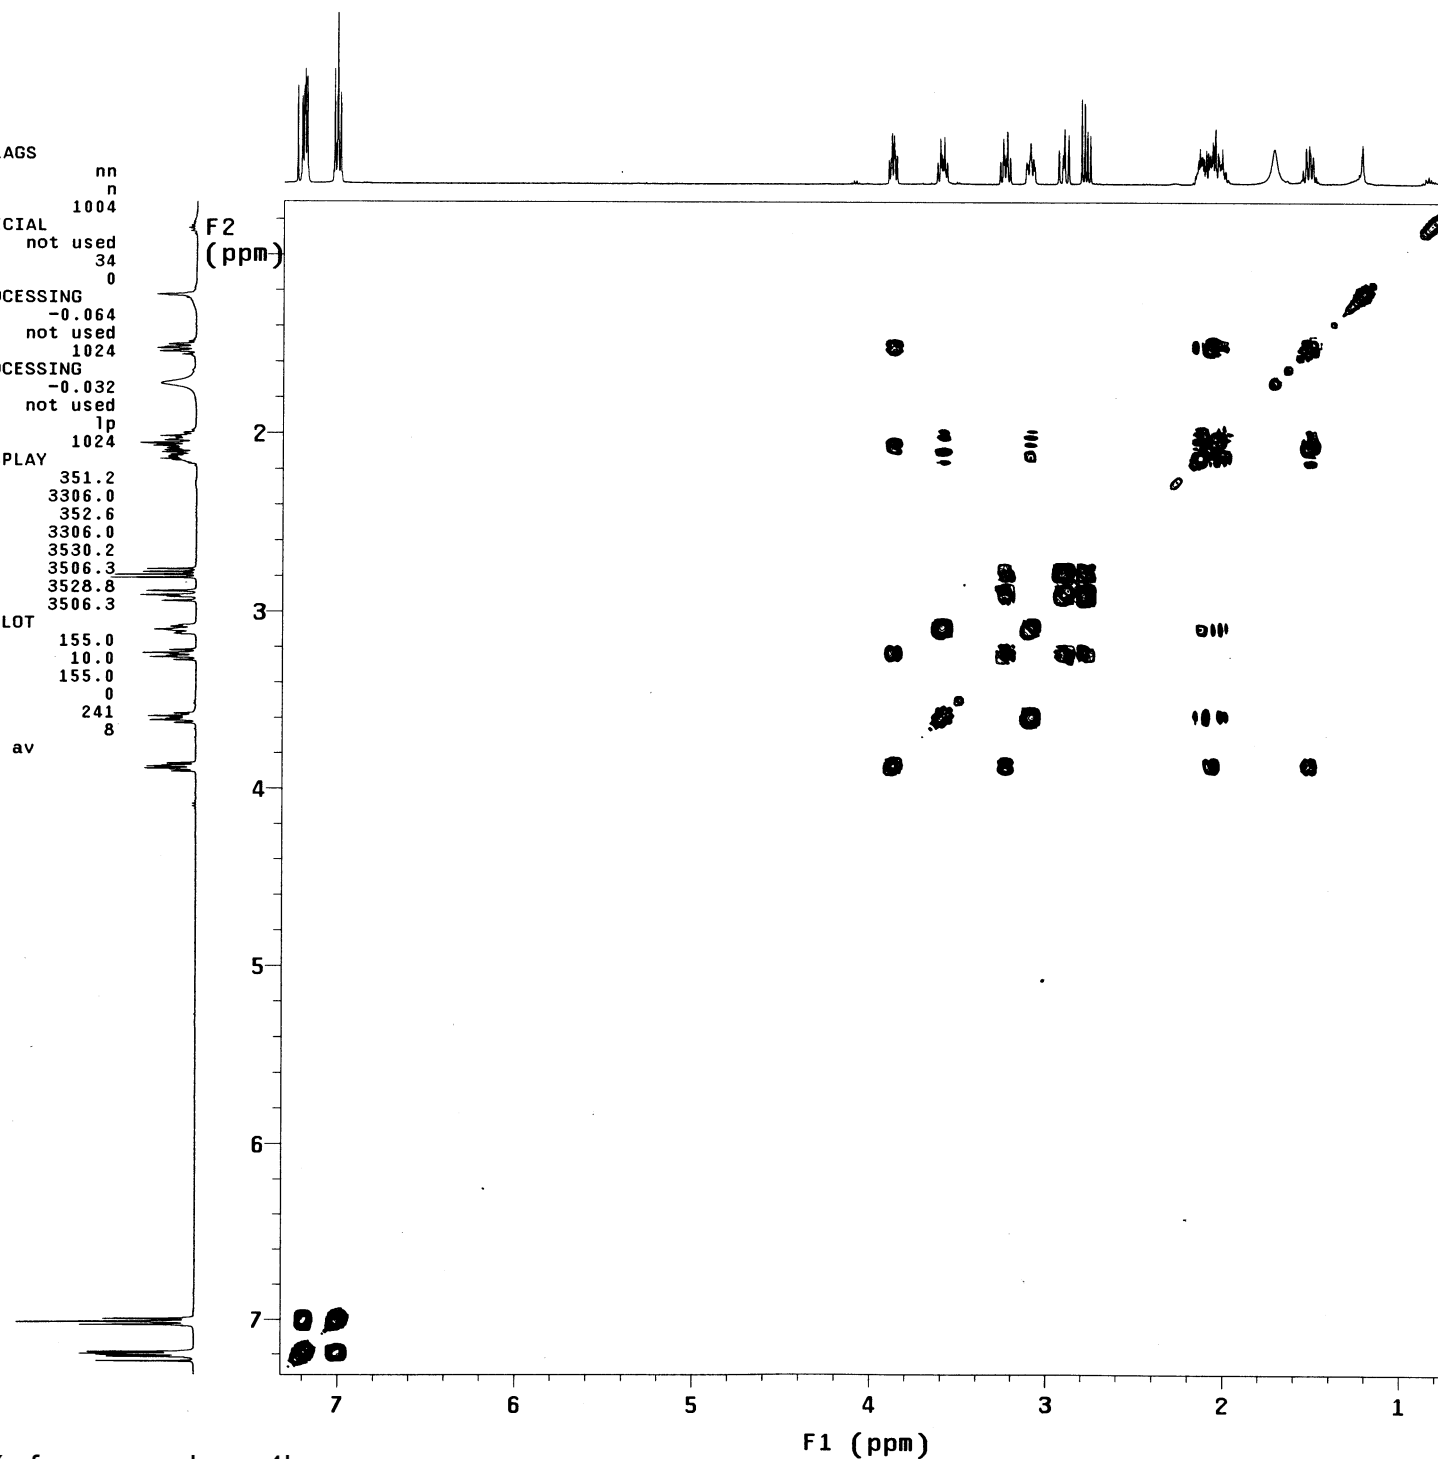

Fig S135. COSY of compound syn-4b

LCH-02-392

exp44 NOESY

| SAMPLE         |             | FLAGS         | n        |
|----------------|-------------|---------------|----------|
| date           | Mar 20 2015 | hs            | y        |
| solvent        | cdcl3       | sspul         | y        |
| sample         | undefined   | PFGflg        | y        |
| ACQUISITION    |             | hsglv         | 1004     |
| sw             | 4001.6      | SPECIAL       |          |
| at             | 0.128       | temp          | not used |
| np             | 1024        | gain          | 34       |
| fb             | not used    | spin          | 0        |
| ss             | 32          | F2 PROCESSING |          |
| d1             | 1.000       | gf            | 0.059    |
| nt             | 16          | gfs           | not used |
| 2D ACQUISITION |             | fn            | 1024     |
| sw1            | 4001.6      | F1 PROCESSING |          |
| ni             | 200         | gf1           | 0.046    |
| TRANSMITTER    |             | gfs1          | not used |
| tn             | H1          | proc1         | lp       |
| sfrq           | 499.832     | fn1           | 1024     |
| tof            | -499.9      | DISPLAY       |          |
| tpwr           | 62          | sp            | 307.5    |
| pw             | 13.800      | wp            | 3392.0   |
| NOESY          |             | sp1           | 316.8    |
| mix            | 0.600       | wp1           | 3384.2   |
| PRESATURATION  |             | rfl           | 3527.0   |
| satmode        | nnnn        | rfp           | 3506.3   |
| satpwr         | 0           | rfl1          | 3525.6   |
| satdly         | 0           | rfp1          | 3506.3   |
| satfrq         | 0           | PLOT          |          |
| DECOUPLER      |             | wc            | 155.0    |
| dn             | C13         | sc            | 10.0     |
| dm             | nnn         | wc2           | 155.0    |
|                |             | sc2           | 0        |
|                |             | vs            | 241      |
|                |             | th            | 3        |
|                |             | ai            | ph       |

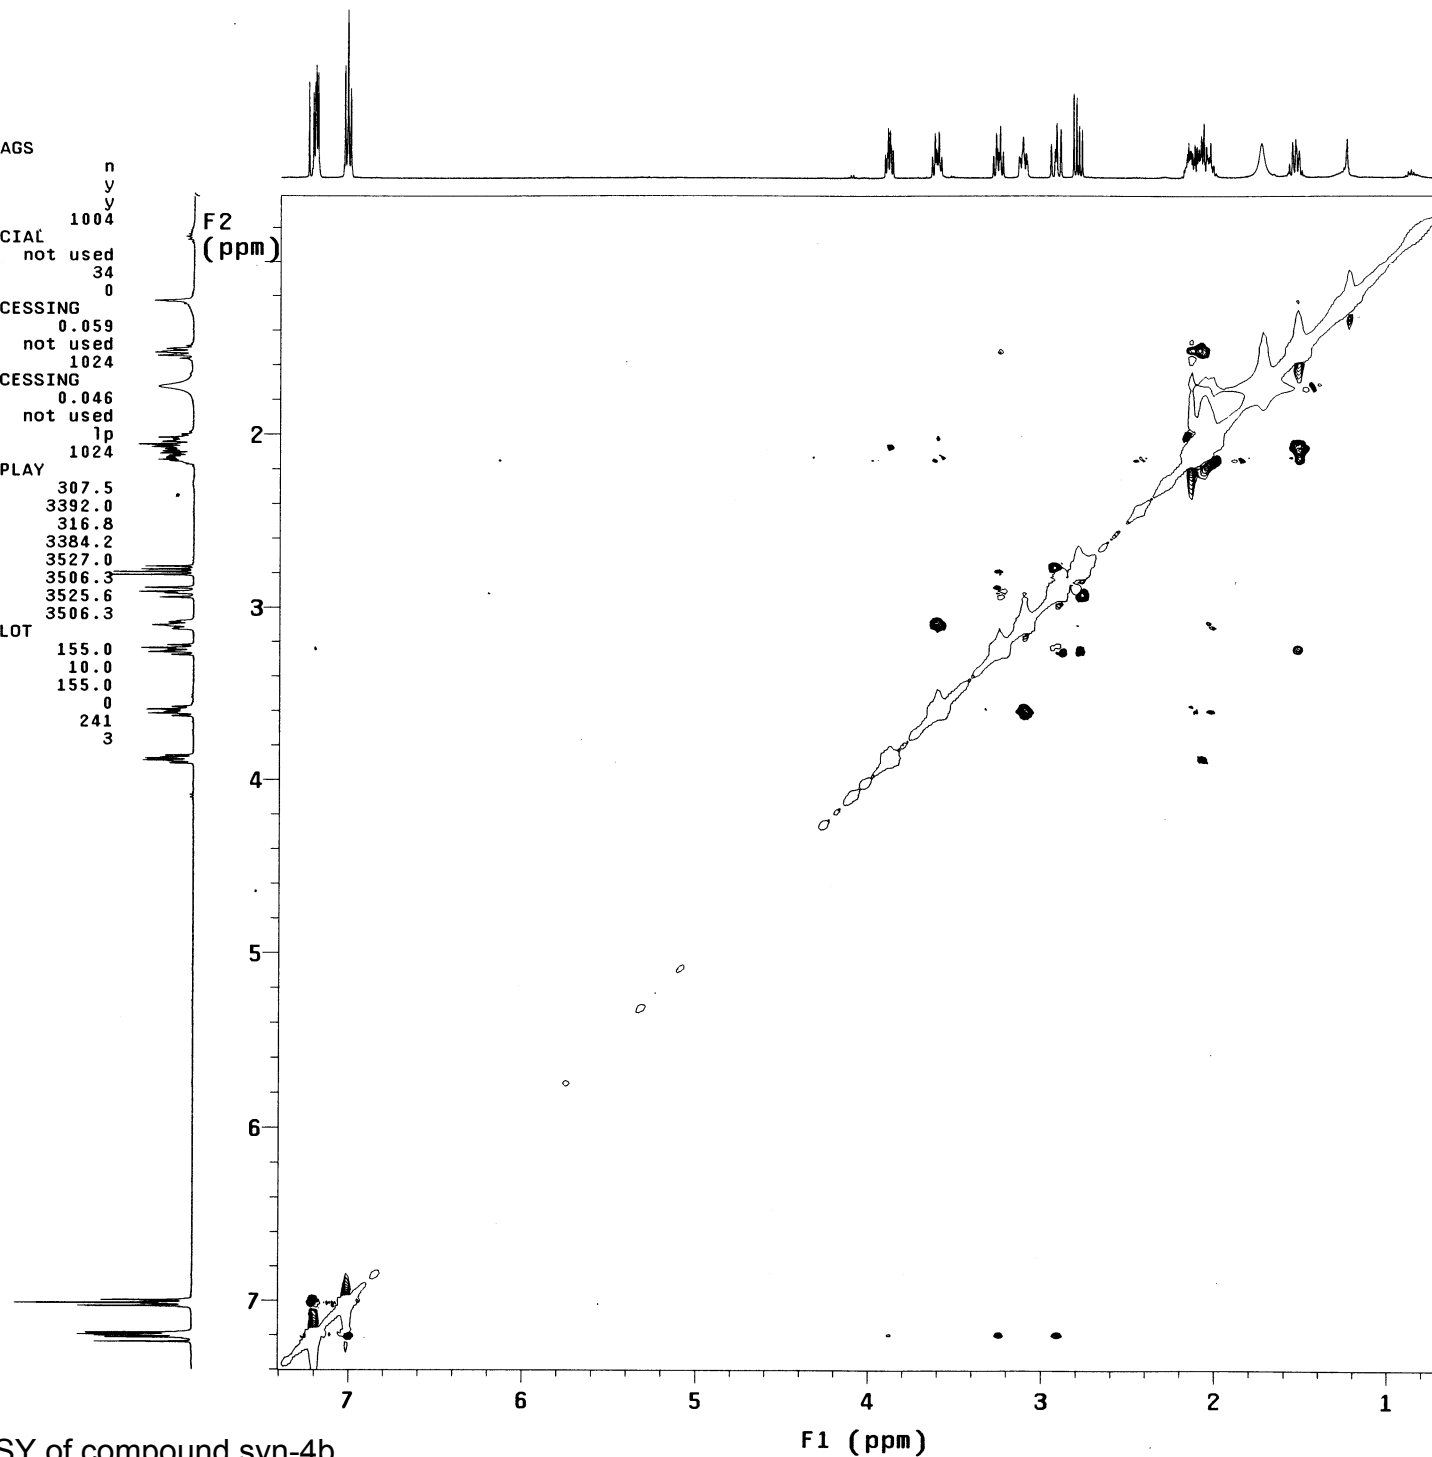

Fig S136. NOESY of compound syn-4b

Fig S137. <sup>1</sup>H NMR (CDCl<sub>3</sub>, 500 MHz NMR) of compound syn-4c

LCH-02-388

exp46 s2pu1

SAMPLE

date Mar 20 2015

solvent cdc13

file exp

ACQUISITION

sfrq 499.833

tn H1

at 3.000

np 48000

sw 8000.0

fb not used

bs 4

tpwr 62

pw 4.8

d1 1.000

tof 499.7

nt 4

ct 4

alock y

gain not used

FLAGS

il n

in n

dp y

hs nn

DISPLAY

sp -250.1

wp 5748.0

vs 85

sc 0

wc 210

hzmm 27.37

is 0.19

rfl 4636.0

rpf 3618.8

th 3

ins 100.000

nm cdc ph

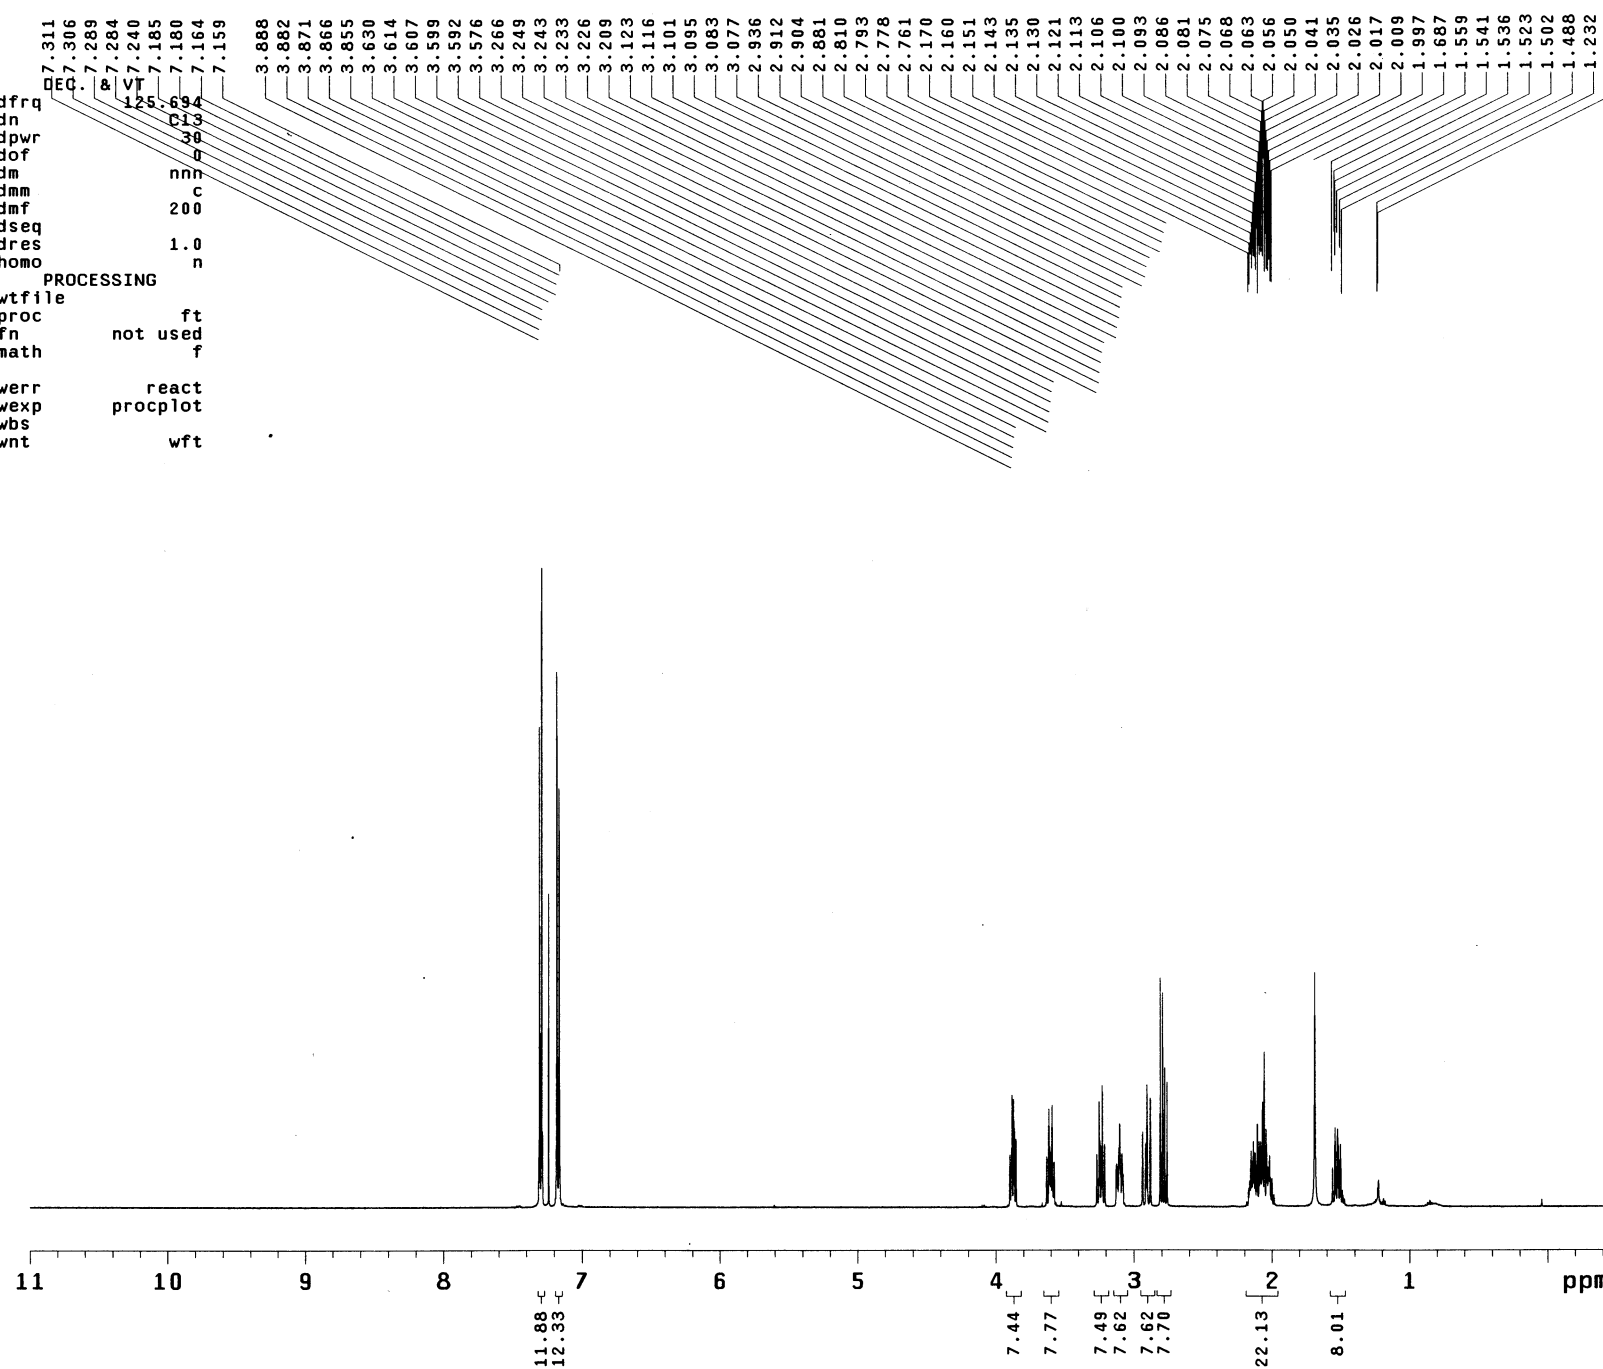

LCH-02-388

exp47 s2pul

| SAMPLE      |             | DEC. & VT  |          |
|-------------|-------------|------------|----------|
| date        | Mar 20 2015 | dfrq       | 499.833  |
| solvent     | cdc13       | dn         | H1       |
| file        | exp         | dpwr       | 44       |
| ACQUISITION |             | dof        | 0        |
| sfrq        | 125.696     | dm         | yyy      |
| tn          | C13         | dmm        | w        |
| at          | 1.000       | dmf        | 8868     |
| np          | 60332       | dseq       |          |
| sw          | 30165.9     | dres       | 1.0      |
| fb          | not used    | homo       | n        |
| bs          | 4           | PROCESSING |          |
| tpwr        | 59          | lb         | 1.00     |
| pw          | 4.8         | wtfile     |          |
| d1          | 1.000       | proc       | ft       |
| tof         | 1883.7      | fn         | 131072   |
| nt          | 4000        | math       | f        |
| ct          | 4000        |            |          |
| alock       | y           | werr       | react    |
| gain        | not used    | wexp       | procplot |
| FLAGS       |             | wbs        | testsn   |
| il          | n           | wnt        | wft      |
| in          | n           |            |          |
| dp          | y           |            |          |
| hs          | nn          |            |          |
| DISPLAY     |             |            |          |
| sp          | -0.2        |            |          |
| wp          | 27649.9     |            |          |
| vs          | 170         |            |          |
| sc          | 0           |            |          |
| wc          | 210         |            |          |
| hzmm        | 131.67      |            |          |
| is          | 33.57       |            |          |
| rfl         | 10968.8     |            |          |
| rfp         | 9677.5      |            |          |
| th          | 7           |            |          |
| ins         | 100.000     |            |          |
| nm          | cdc ph      |            |          |

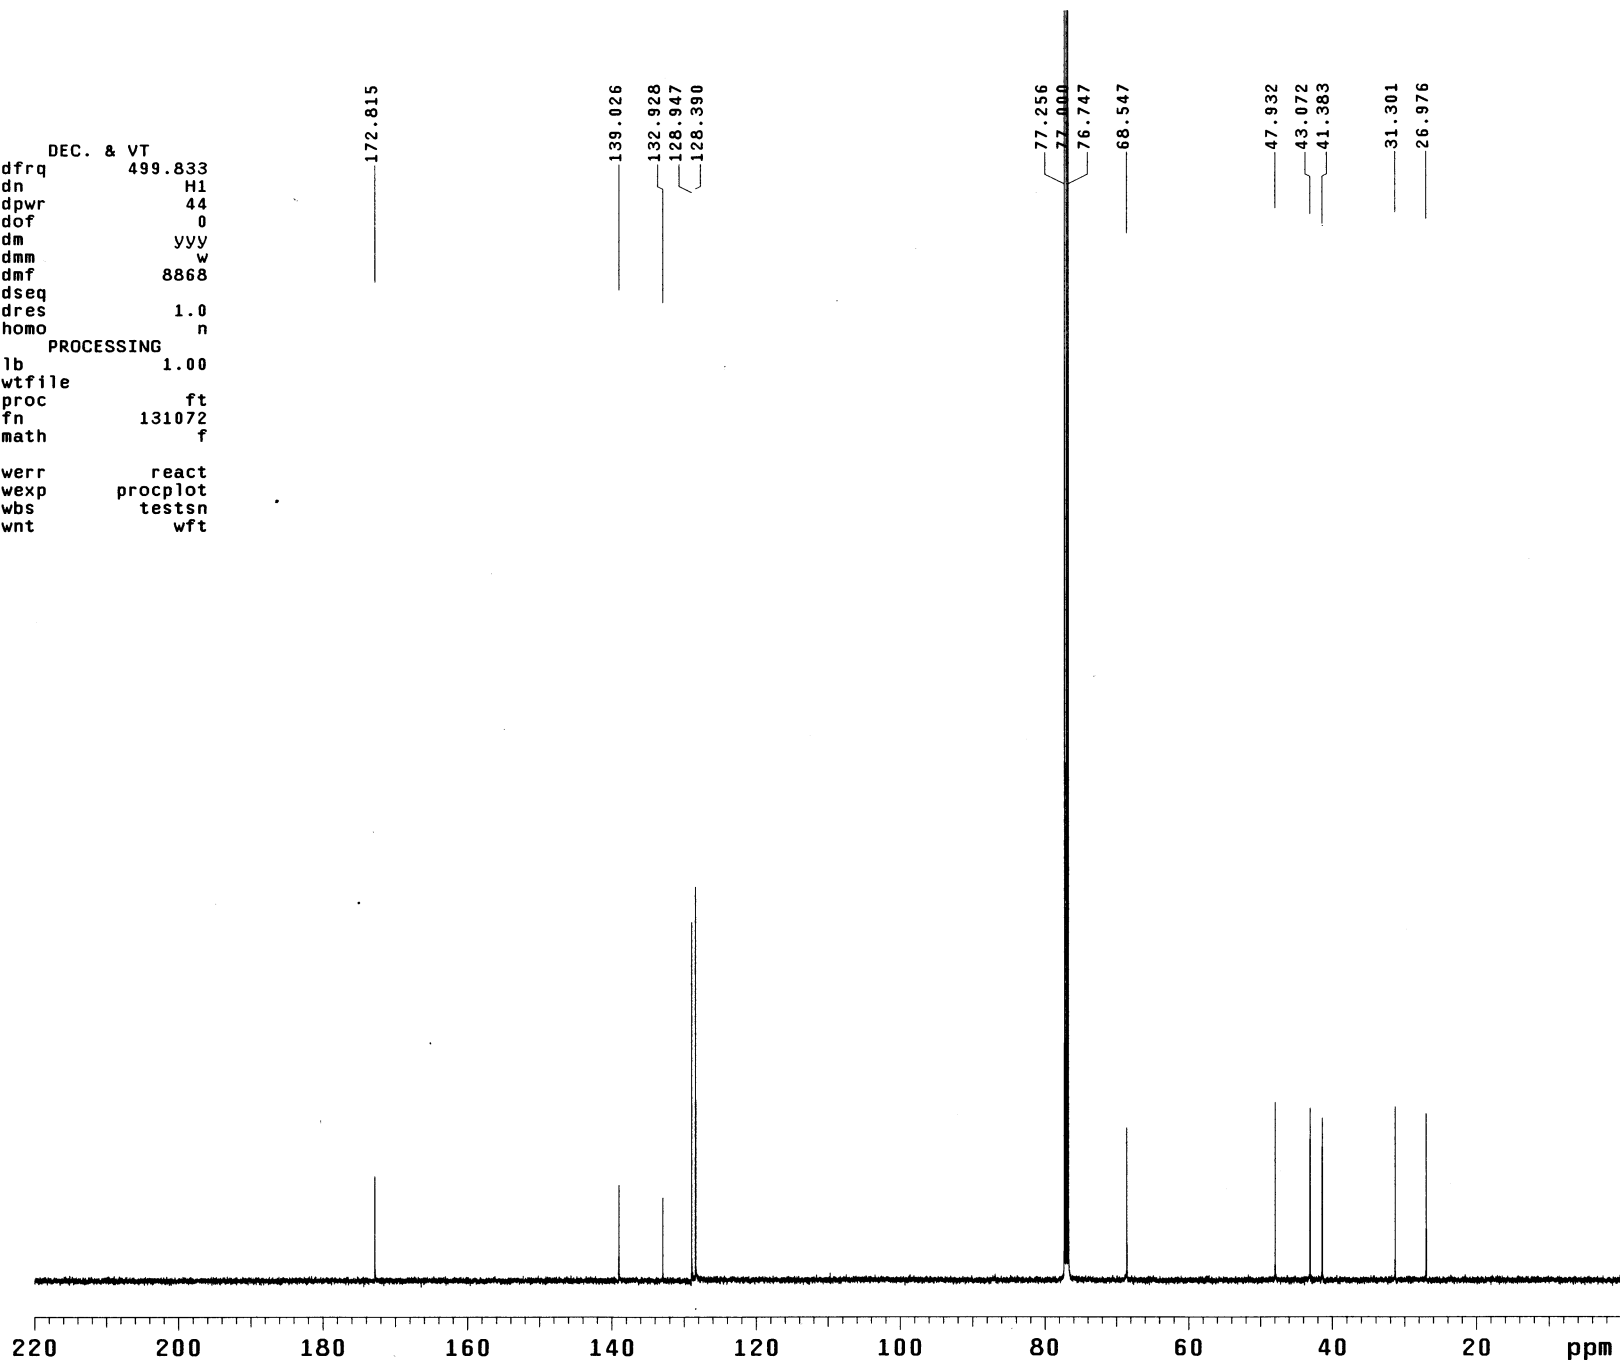Fig S138. <sup>13</sup>C NMR (CDCl<sub>3</sub>, 125 MHz NMR) of compound syn-4c

Fig S139. DEPT of compound syn-4c

LCH-02-388

exp48 DEPT

|             |             |               |                    |
|-------------|-------------|---------------|--------------------|
| SAMPLE      |             | DEPT          | ACQUISITION ARRAYS |
| date        | Mar 20 2015 | j1xh 140.0    | array mult         |
| solvent     | cdcl3       | mult arrayed  | arraydim 3         |
| sample      | undefined   | SPECIAL       |                    |
| ACQUISITION |             | temp not used | i mult             |
| sw          | 30165.9     | gain 34       | 1 0.5              |
| at          | 1.000       | spin 0        | 2 1                |
| np          | 60332       | PROCESSING    | 3 1.5              |
| bs          | 4           | lb 1.00       |                    |
| ss          | -4          | fn 131072     |                    |
| d1          | 1.000       | SPECTRUM      |                    |
| nt          | 2000        | wp 27649.9    |                    |
| ct          | 2000        | sp -0.2       |                    |
| TRANSMITTER |             | rp 28.7       |                    |
| tn          | C13         | lp 229.1      |                    |
| tof         | 1883.7      | ai cdc ph     |                    |
| tpwr        | 59          | REFERENCE     |                    |
| pw          | 14.700      | rfl 1291.3    |                    |
| DECOUPLER   |             | rfp 0         |                    |
| dn          | H1          | PLOT          |                    |
| dof         | 0           | wc 210        |                    |
| dpwr        | 44          | sc 0          |                    |
| dm          | nny         | vs 1000       |                    |
| dmm         | ccw         | hzmm 131.67   |                    |
| dmf         | 8868        | th 7          |                    |
| pplvl       | 59          |               |                    |
| pp          | 21.200      |               |                    |

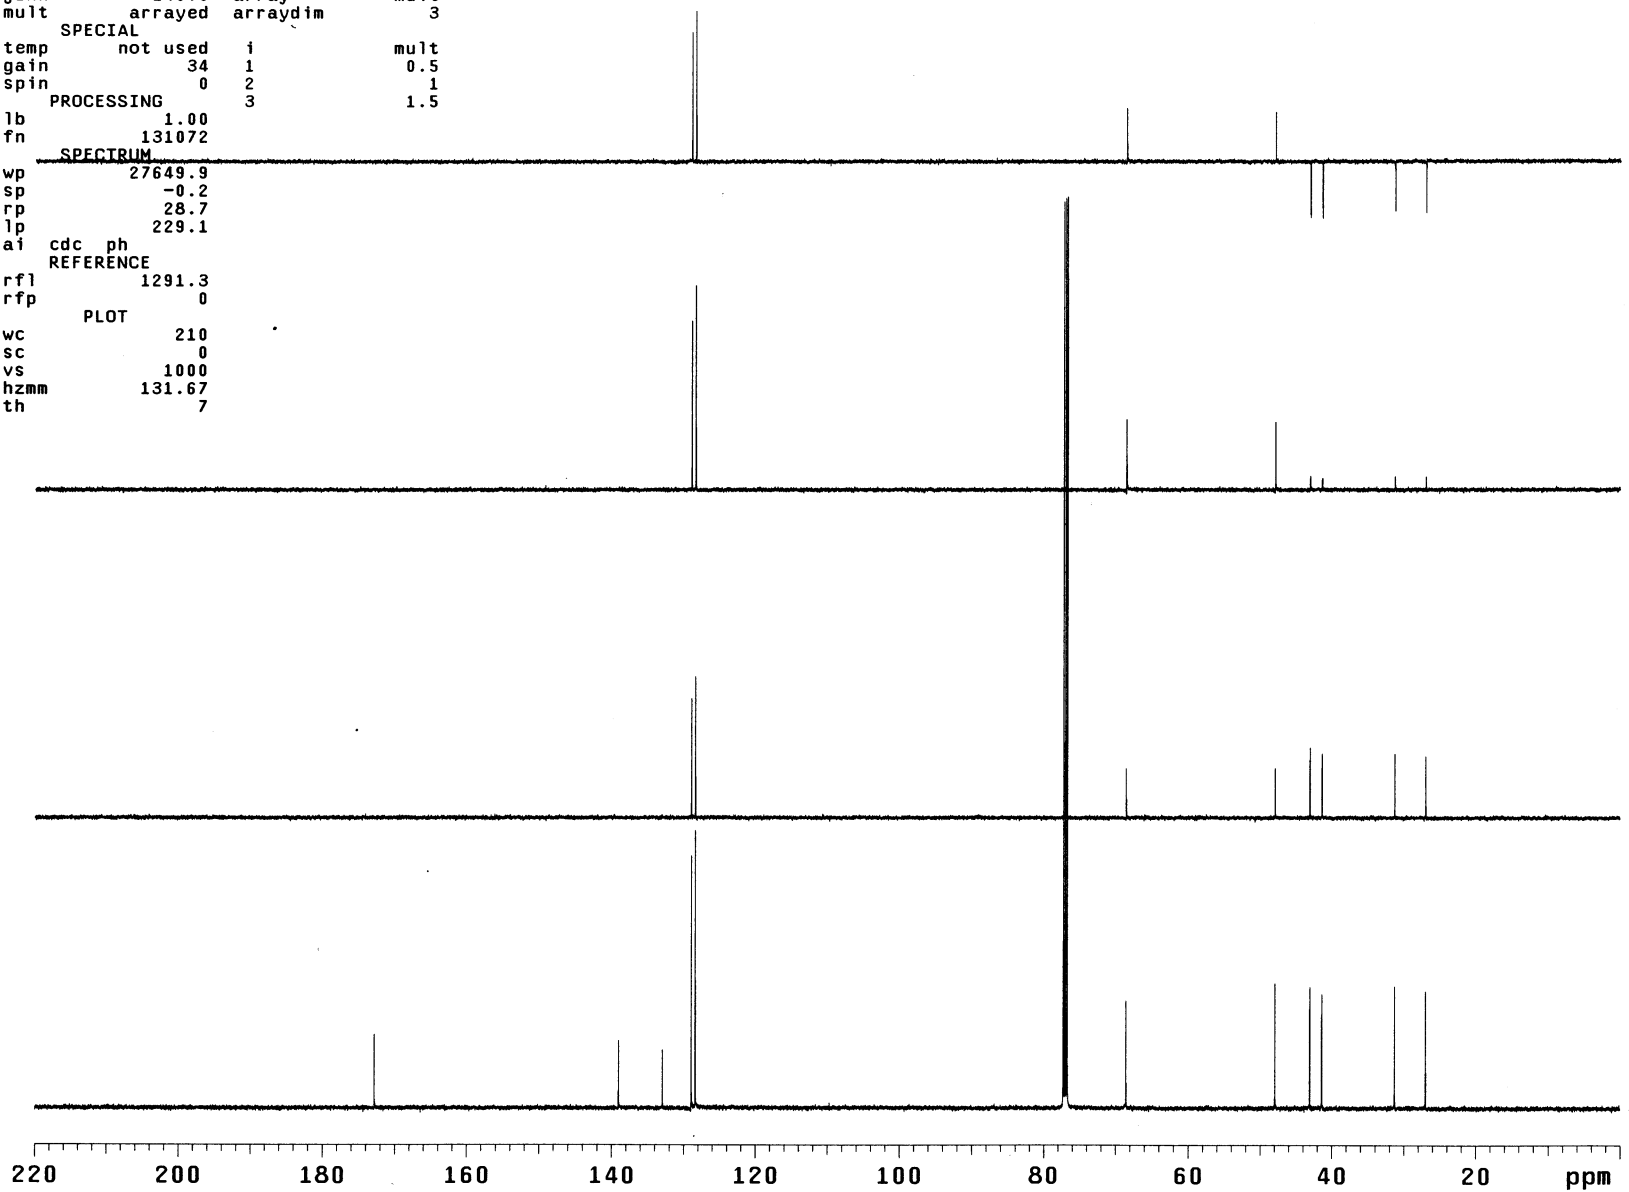

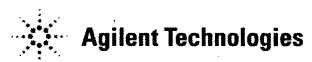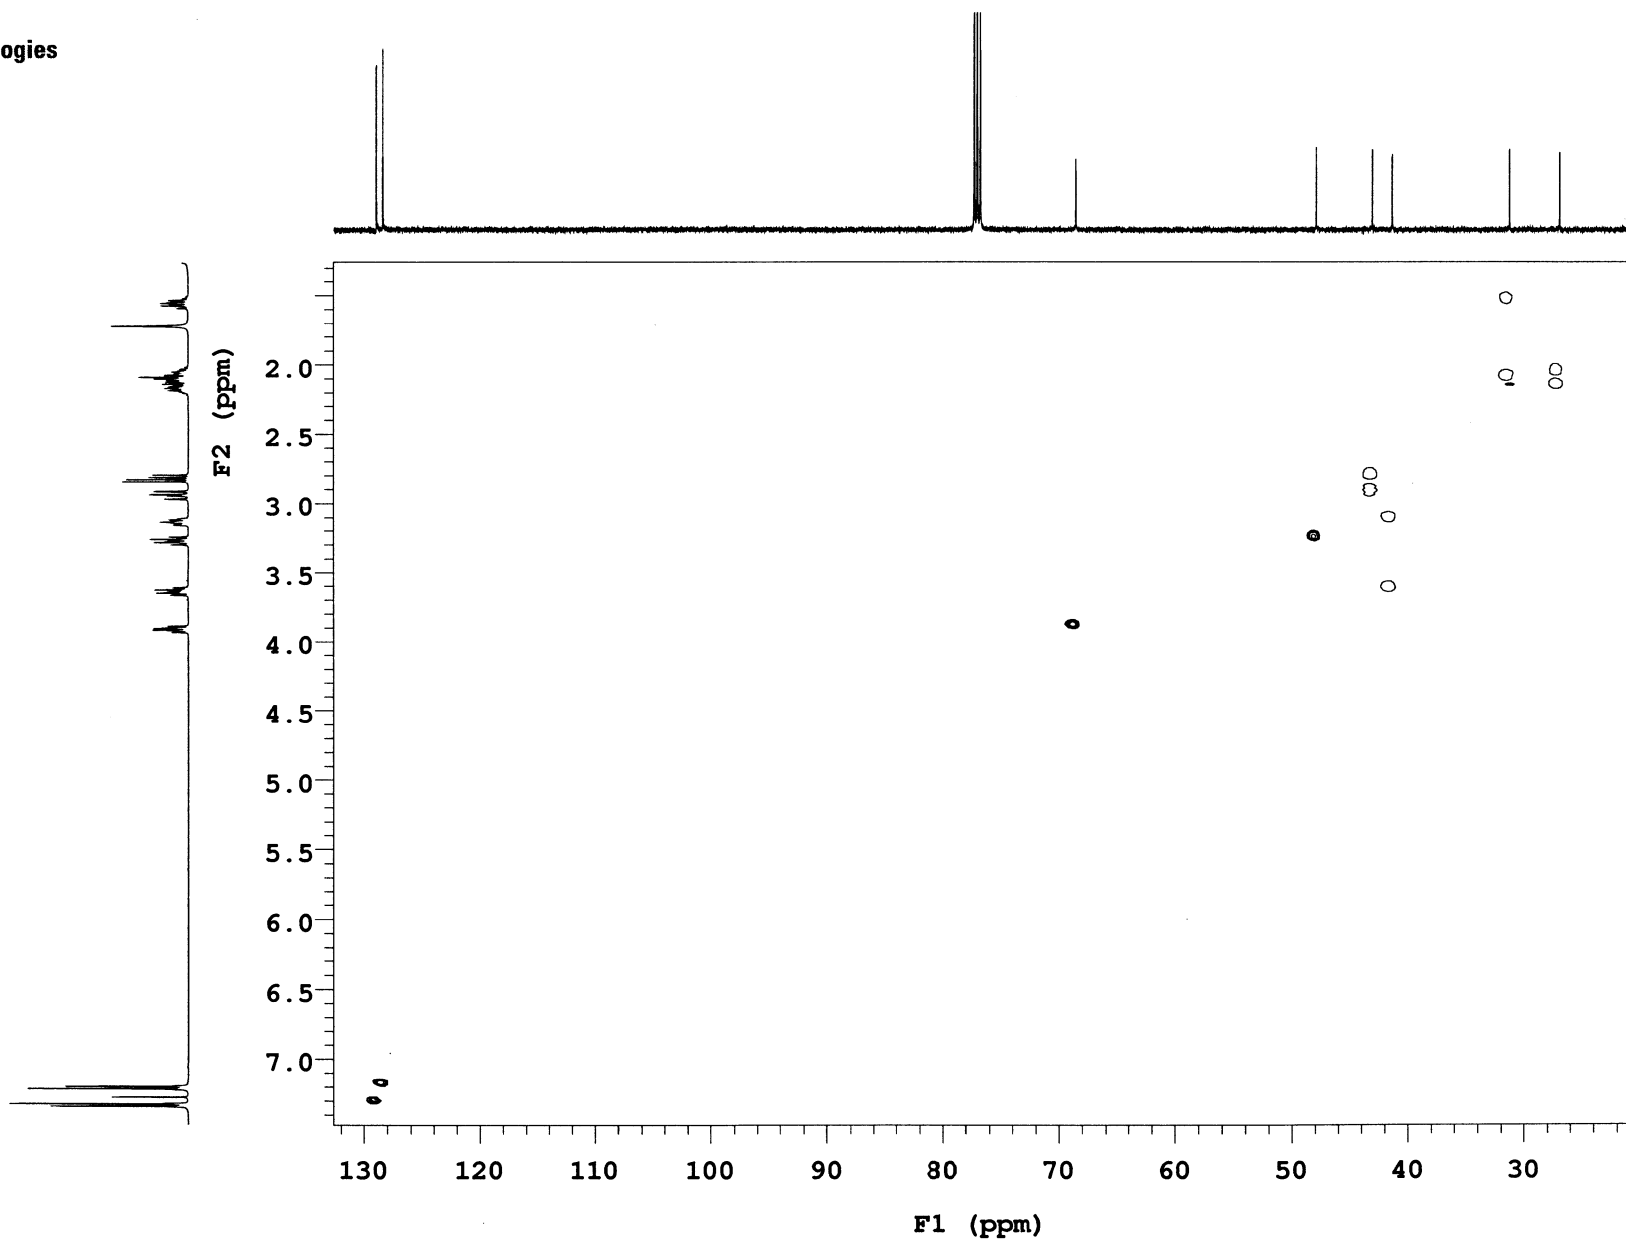



Fig S141. COSY of compound syn-4c

LCH-02-388

exp49 gCOSY

| SAMPLE         |             | FLAGS         |          |
|----------------|-------------|---------------|----------|
| date           | Mar 20 2015 | hs            | nn       |
| solvent        | cdcl3       | sspul         | n        |
| sample         | undefined   | hsglv1        | 1004     |
| ACQUISITION    |             | SPECIAL       |          |
| sw             | 4001.6      | temp          | not used |
| at             | 0.128       | gain          | 34       |
| np             | 1024        | spin          | 0        |
| fb             | not used    | F2 PROCESSING |          |
| ss             | 16          | sb            | -0.064   |
| d1             | 1.000       | sbs           | not used |
| nt             | 8           | fn            | 1024     |
| 2D ACQUISITION |             | F1 PROCESSING |          |
| sw1            | 4001.6      | sb1           | -0.032   |
| ni             | 128         | sbs1          | not used |
| TRANSMITTER    |             | PROC1         |          |
| tn             | H1          | lp            |          |
| sfrq           | 499.832     | fn1           | 1024     |
| tof            | -499.9      | DISPLAY       |          |
| tpwr           | 62          | sp            | 249.5    |
| pw             | 13.800      | wp            | 3501.4   |
| GRADIENTS      |             | sp1           | 256.2    |
| gzlv11         | 1004        | wp1           | 3501.4   |
| gt1            | 0.001000    | rfl           | 3635.0   |
| gstab          | 0.000500    | rfp           | 3618.8   |
| DECOUPLER      |             | rfl1          | 3635.0   |
| dn             | C13         | rfp1          | 3618.8   |
| dm             | nnn         | PLOT          |          |
|                |             | wc            | 155.0    |
|                |             | sc            | 10.0     |
|                |             | wc2           | 155.0    |
|                |             | sc2           | 0        |
|                |             | vs            | 117      |
|                |             | th            | 8        |
|                |             | ai            | cdc av   |

F2  
(ppm)

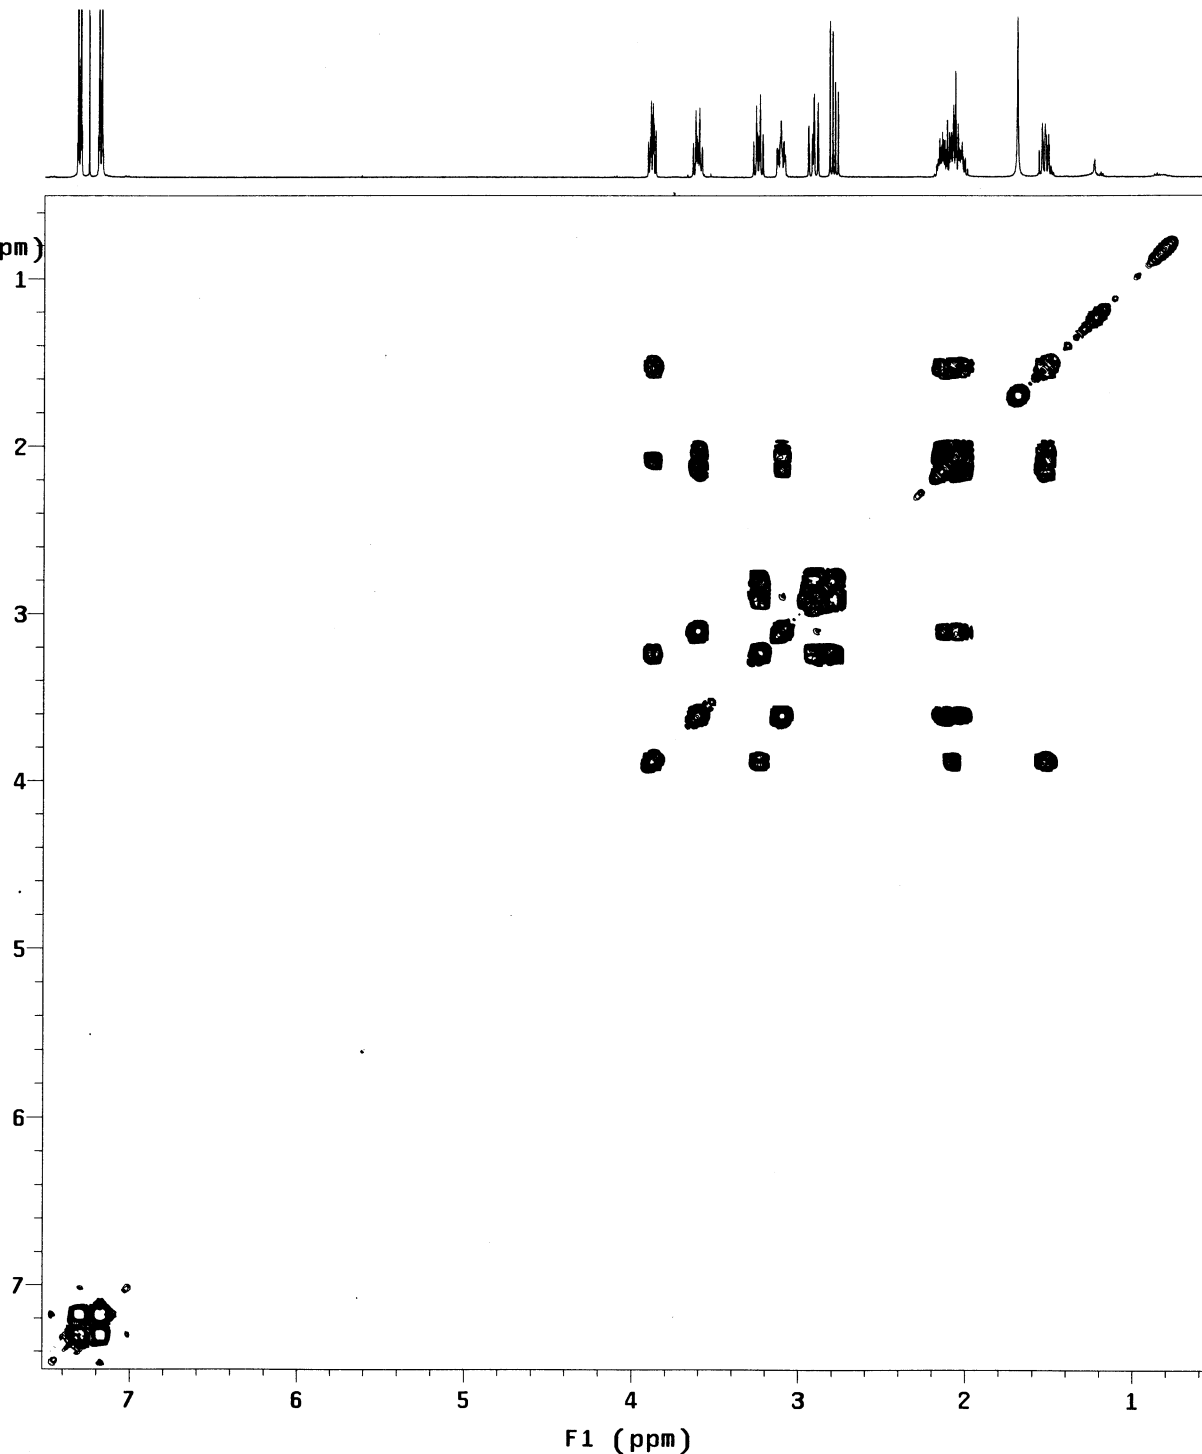

F1 (ppm)

Fig S142. NOESY of compound syn-4c

LCH-02-388

exp50 NOESY

| SAMPLE         |             | FLAGS         |          | n |
|----------------|-------------|---------------|----------|---|
| date           | Mar 29 2015 | hs            |          |   |
| solvent        | cdc13       | sspul         |          | y |
| sample         | undefined   | PFGflg        |          | y |
| ACQUISITION    |             | hsglvi        | 1004     |   |
| sw             | 4001.6      | SPECIAL       |          |   |
| at             | 0.128       | temp          | not used |   |
| np             | 1024        | gain          | 34       |   |
| fb             | not used    | spin          | 0        |   |
| ss             | 32          | F2 PROCESSING |          |   |
| d1             | 1.000       | gf            | 0.059    |   |
| nt             | 16          | gfs           | not used |   |
| 2D ACQUISITION |             | fn            | 1024     |   |
| sw1            | 4001.6      | F1 PROCESSING |          |   |
| ni             | 200         | gf1           | 0.046    |   |
| TRANSMITTER    |             | gfs1          | not used |   |
| tn             | H1          | proc1         | 1p       |   |
| sfrq           | 499.832     | fn1           | 1024     |   |
| tof            | -499.9      | DISPLAY       |          |   |
| tpwr           | 62          | sp            | 352.3    |   |
| pw             | 13.800      | wp            | 3415.4   |   |
| NOESY          |             | sp1           | 359.0    |   |
| mix            | 0.600       | wp1           | 3407.6   |   |
| PRESATURATION  |             | rfl           | 3533.8   |   |
| satmode        | nnnn        | rfp           | 3618.8   |   |
| satpwr         | 0           | rfl1          | 3634.9   |   |
| satdly         | 0           | rfp1          | 3618.8   |   |
| satfrq         | 0           | PLOT          |          |   |
| DECOUPLER      |             | wc            | 155.0    |   |
| dn             | C13         | sc            | 10.0     |   |
| dm             | nnn         | wc2           | 155.0    |   |
|                |             | sc2           | 0        |   |
|                |             | vs            | 79       |   |
|                |             | th            | 2        |   |
|                |             | ai            | ph       |   |

F2 (ppm)

2

3

4

5

6

7

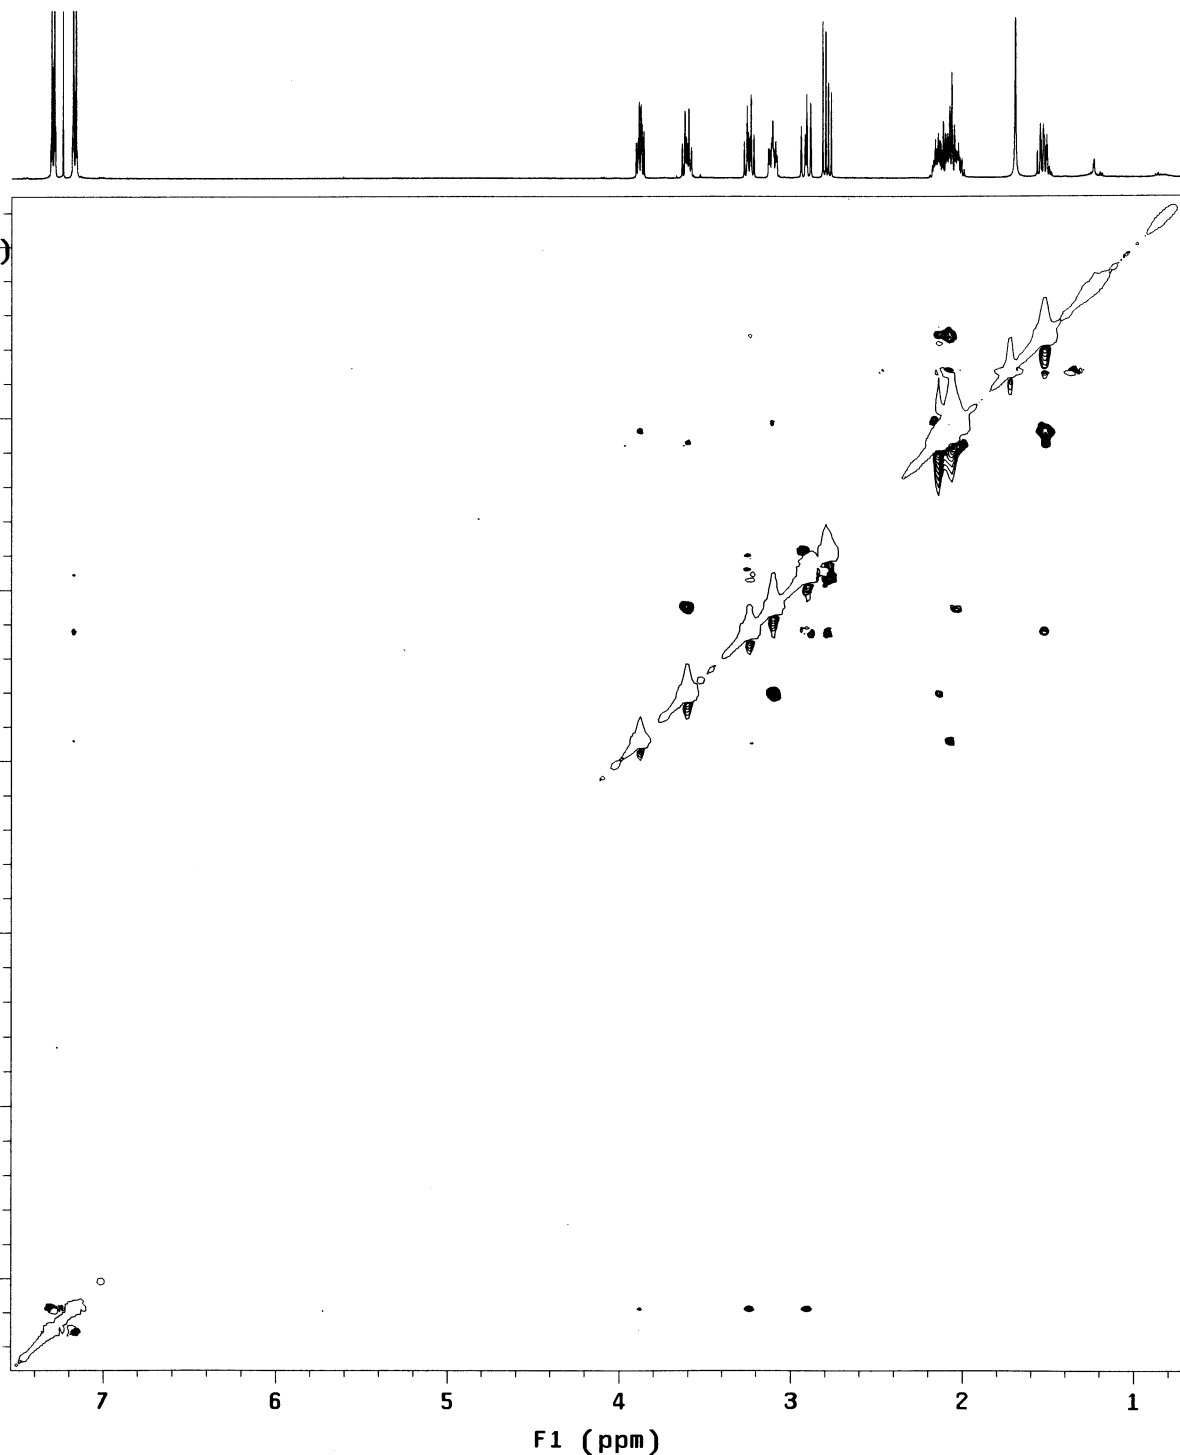

F1 (ppm)

LCH-02-355

exp71 s2pu1

|             |            |               |  |
|-------------|------------|---------------|--|
| SAMPLE      |            | DEC. & VT     |  |
| date        | Jan 6 2015 | dfrq 125.694  |  |
| solvent     | cdc13      | dn C13        |  |
| file        | exp        | dpwr 30       |  |
| ACQUISITION |            | dof 0         |  |
| sfrq        | 499.833    | dm nnn        |  |
| tn          | H1         | dmm c         |  |
| at          | 3.000      | dmf 200       |  |
| np          | 48000      | dseq          |  |
| sw          | 8000.0     | dres 1.0      |  |
| fb          | not used   | homo n        |  |
| bs          | 4          | PROCESSING    |  |
| tpwr        | 62         | wfile         |  |
| pw          | 4.8        | proc ft       |  |
| d1          | 1.000      | fn not used   |  |
| tof         | 499.7      | math f        |  |
| nt          | 4          |               |  |
| ct          | 4          | werr react    |  |
| alock       | y          | wexp procplot |  |
| gain        | not used   | wbs           |  |
| FLAGS       |            | wnt wft       |  |
| l1          | n          |               |  |
| in          | n          |               |  |
| dp          | y          |               |  |
| hs          | nn         |               |  |
| DISPLAY     |            |               |  |
| sp          | -0.1       |               |  |
| wp          | 5997.8     |               |  |
| vs          | 80         |               |  |
| sc          | 0          |               |  |
| wc          | 210        |               |  |
| hzmm        | 28.56      |               |  |
| is          | 0.00       |               |  |
| rfl         | 4635.7     |               |  |
| rfp         | 3618.8     |               |  |
| th          | 5          |               |  |
| ins         | 1.000      |               |  |
| nm          | cdc ph     |               |  |

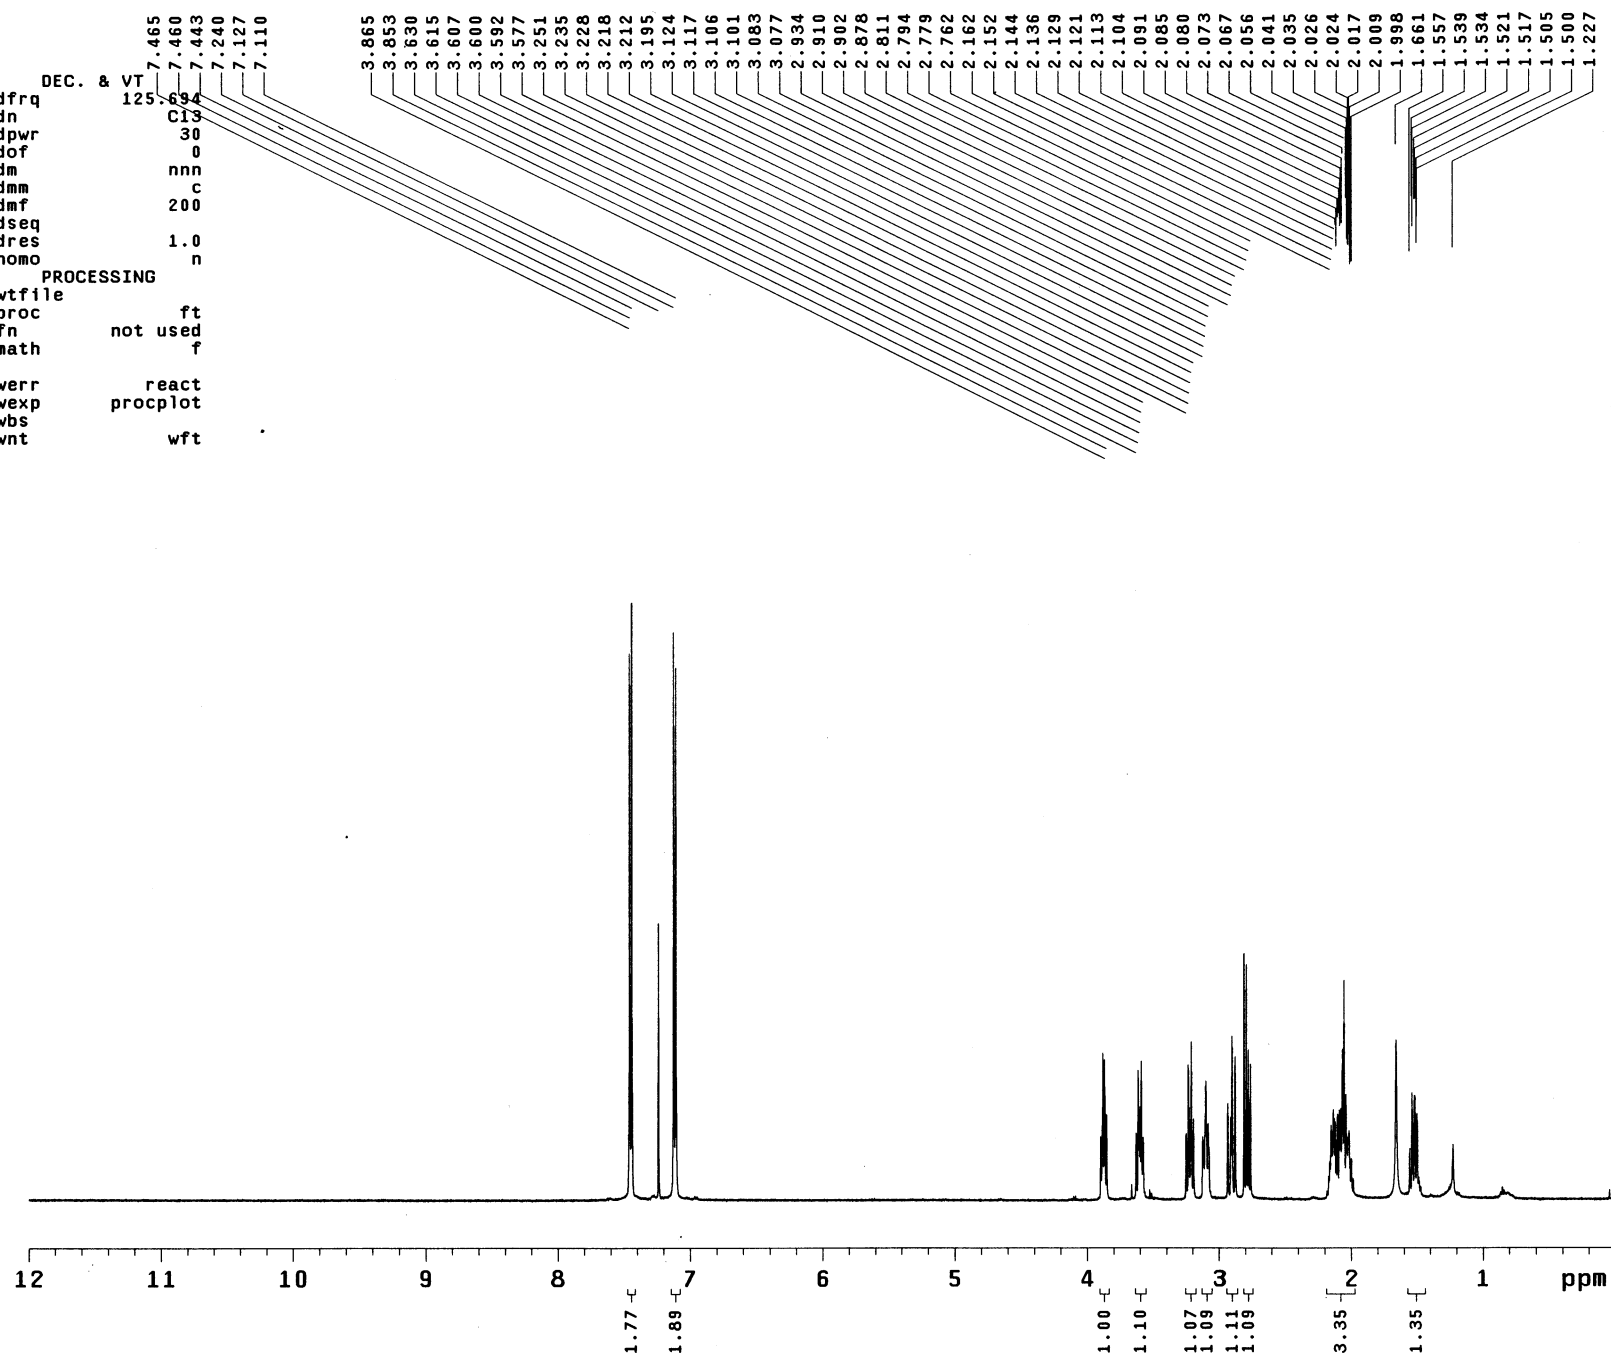Fig S143. <sup>1</sup>H NMR (CDCl<sub>3</sub>, 500 MHz) of compound syn-4d

LCH-02-355  
exp72 s2pu1

```

SAMPLE          DEC. & VT
date Jan 6 2015 dfrq          499.833
solvent cdc13      dn          H1
file      exp      dpwr         44
ACQUISITION    dof          0
sfrq 125.696      dm          vvy
tn    C13         dmm          w
at    1.000       dmf         8868
np    60332       dseq
sw    30165.9     dres          1.0
fb    not used   homo          n
bs    4           PROCESSING
tpwr  59         lb          1.00
pw    4.8        wtfile
dl    1.000      proc          ft
tof   1883.7    fn          131072
nt    5000      math          f
ct    5000
alock not used   werr          react
gain  not used   wexp         procplot
      FLAGS      wbs          testsn
il    n          wnt          wft
in    n
dp    y
hs    nn
DISPLAY
sp    -1257.0
wp    28906.5
vs    200
sc    0
wc    210
hzmm  137.65
is    33.57
rfl   1257.9
rfp   0
th    9
ins   100.000
nm cdc ph

```

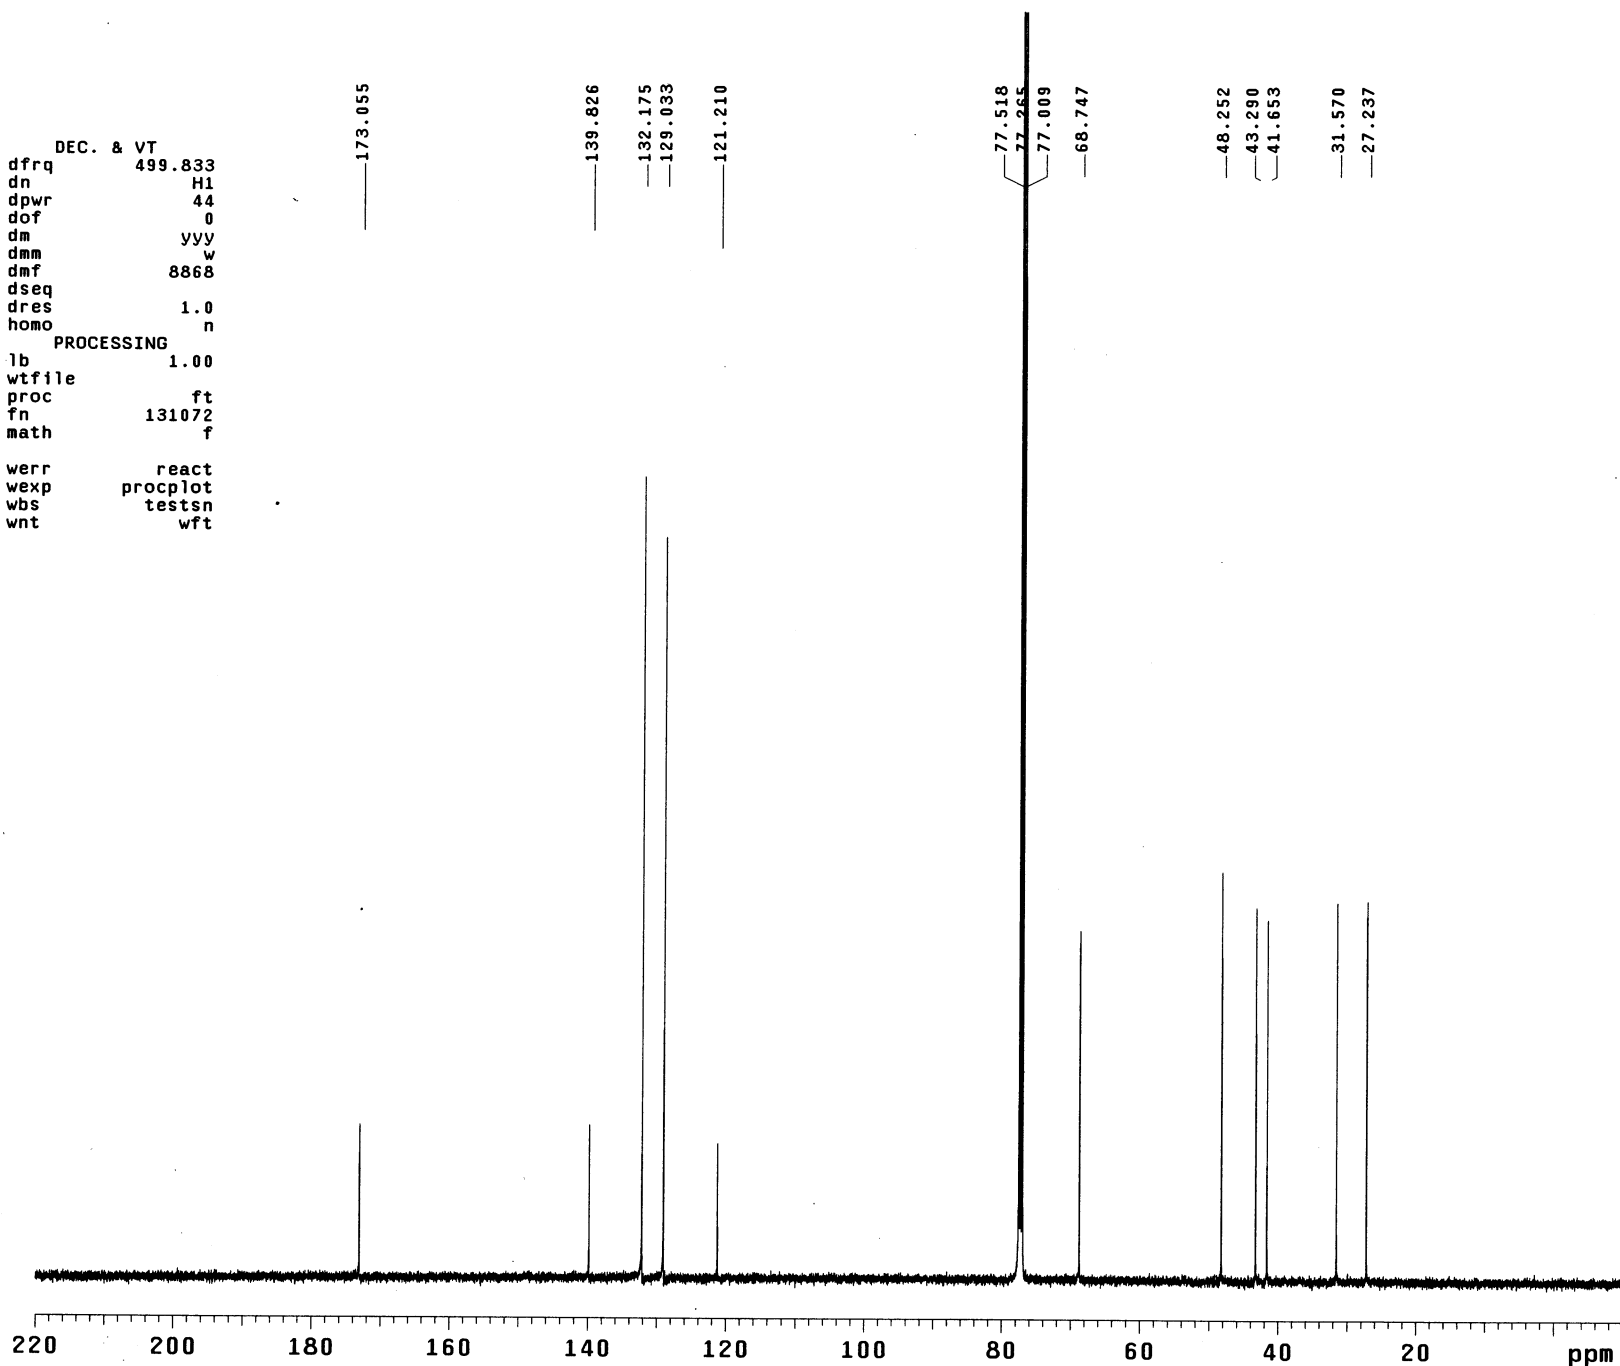

Fig S144.  $^{13}\text{C}$  NMR ( $\text{CDCl}_3$ , 125 MHz) of compound syn-4d

Fig S145. DEPT of compound syn-4d

LCH-02-355

exp73 DEPT

| SAMPLE      |            | DEPT          | ACQUISITION ARRAYS |      |
|-------------|------------|---------------|--------------------|------|
| date        | Jan 6 2015 | j1xh 140.0    | array              | mult |
| solvent     | cdc13      | mult arrayed  | arraydim           | 3    |
| sample      | undefined  | SPECIAL       |                    |      |
| ACQUISITION |            | temp not used | 1                  | mult |
| sw          | 30165.9    | gain          | 34                 | 0.5  |
| at          | 1.000      | spin          | 0                  | 1    |
| np          | 60332      | PROCESSING    | 3                  | 1.5  |
| bs          | 4          | lb            | 1.00               |      |
| ss          | -4         | fn            | 131072             |      |
| d1          | 1.000      | SPECTRUM      |                    |      |
| nt          | 2500       | wp            | 28906.5            |      |
| ct          | 2500       | sp            | -1257.2            |      |
| TRANSMITTER |            | rp            | -160.4             |      |
| tn          | C13        | lp            | 220.7              |      |
| tof         | 1883.7     | ai            | cdc ph             |      |
| tpwr        | 59         | REFERENCE     |                    |      |
| pw          | 14.700     | rf1           | 1290.8             |      |
| DECOUPLER   |            | rfp           | 0                  |      |
| dn          | H1         | PLOT          |                    |      |
| dof         | 0          | wc            | 210                |      |
| dpwr        | 44         | sc            | 0                  |      |
| dm          | nny        | vs            | 600                |      |
| dmm         | 8868       | ccw           | 137.65             |      |
| dmf         | 59         | th            | 7                  |      |
| pp1v1       | 21.200     |               |                    |      |

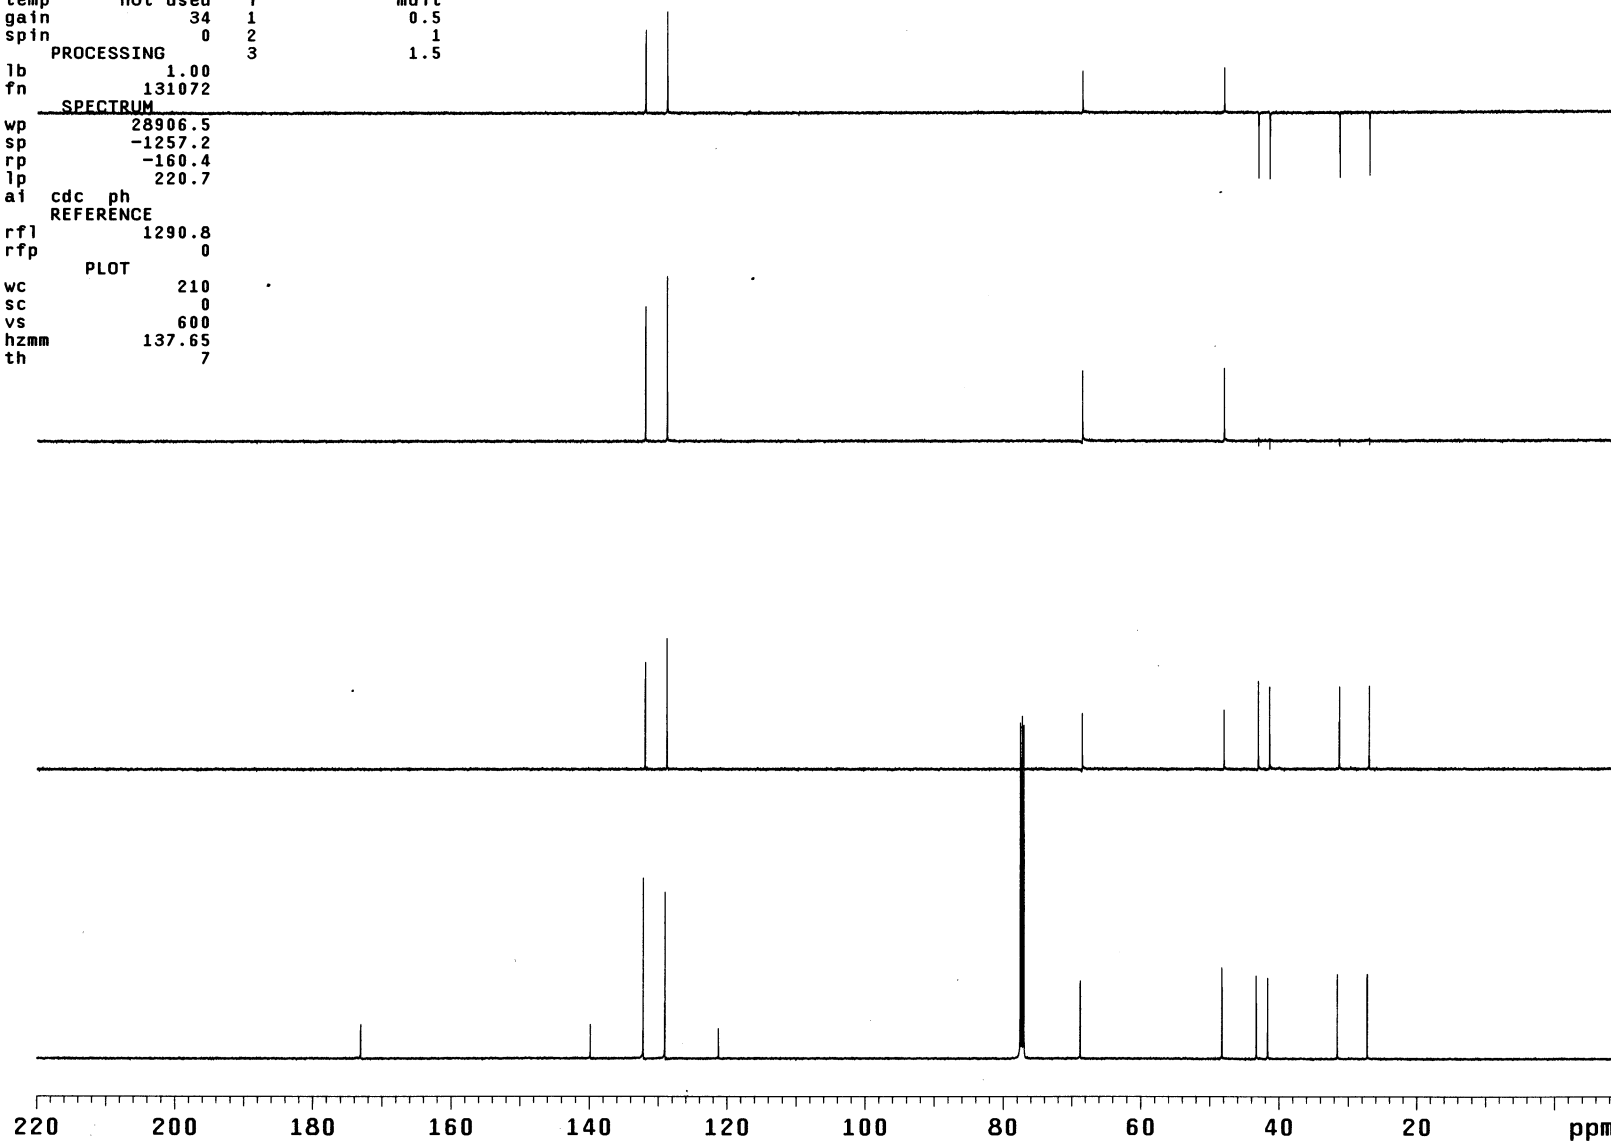

Fig S146. HSQC of compound syn-4d

LCH-02-355

exp76 gHSQC

| SAMPLE         |            | FLAGS         | ACQUISITION ARRAYS |          |
|----------------|------------|---------------|--------------------|----------|
| date           | Jan 6 2015 | hs            | n                  | array    |
| solvent        | cdcl3      | sspul         | y                  | arraydim |
| sample         | undefined  | PFGflg        | y                  | phase    |
| ACQUISITION    |            | hsglv1        | 1004               | 1        |
| sw             | 4001.6     | SPECIAL       | 1                  | phase    |
| at             | 0.128      | temp          | not used           | 2        |
| np             | 1024       | gain          | 54                 |          |
| fb             | not used   | spin          | 0                  |          |
| ss             | 32         | GRADIENTS     |                    |          |
| d1             | 1.000      | gzlv11        | 1004               |          |
| nt             | 8          | gt1           | 0.002000           |          |
| 2D ACQUISITION |            | gzlv13        | 505                |          |
| sw1            | 21367.5    | gt3           | 0.001000           |          |
| n1             | 128        | gstab         | 0.000500           |          |
| phase          | arrayed    | F2 PROCESSING |                    |          |
| TRANSMITTER    |            | gf            | 0.059              |          |
| tn             | H1         | gfs           | not used           |          |
| sfrq           | 499.832    | fn            | 1024               |          |
| tof            | -499.9     | F1 PROCESSING |                    |          |
| tpwr           | 62         | gf1           | 0.006              |          |
| pw             | 13.800     | gfs1          | not used           |          |
| DECOUPLER      |            | procl         | 1p                 |          |
| dn             | C13        | fn1           | 2048               |          |
| dof            | -2515.1    | DISPLAY       |                    |          |
| dm             | nny        | sp            | 715.9              |          |
| dmm            | ccp        | wp            | 3118.4             |          |
| dmf            | 32258      | sp1           | 3226.7             |          |
| dpwr           | 43         | wp1           | 13730.3            |          |
| pwxlvl         | 61         | rf1           | 3739.7             |          |
| pw             | 11.000     | rfl           | 3728.7             |          |
| HSQC           |            | rfl1          | 17871.8            |          |
| j1xh           | 140.0      | rflp1         | 16612.1            |          |
| nullflg        | y          | PLOT          |                    |          |
| mult           | 2          | wc            | 150.0              |          |
|                |            | sc            | 6.2                |          |
|                |            | wc2           | 116.2              |          |
|                |            | sc2           | 0                  |          |
|                |            | vs            | 232                |          |
|                |            | th            | 6                  |          |
|                |            | ai            | cdc                | ph       |

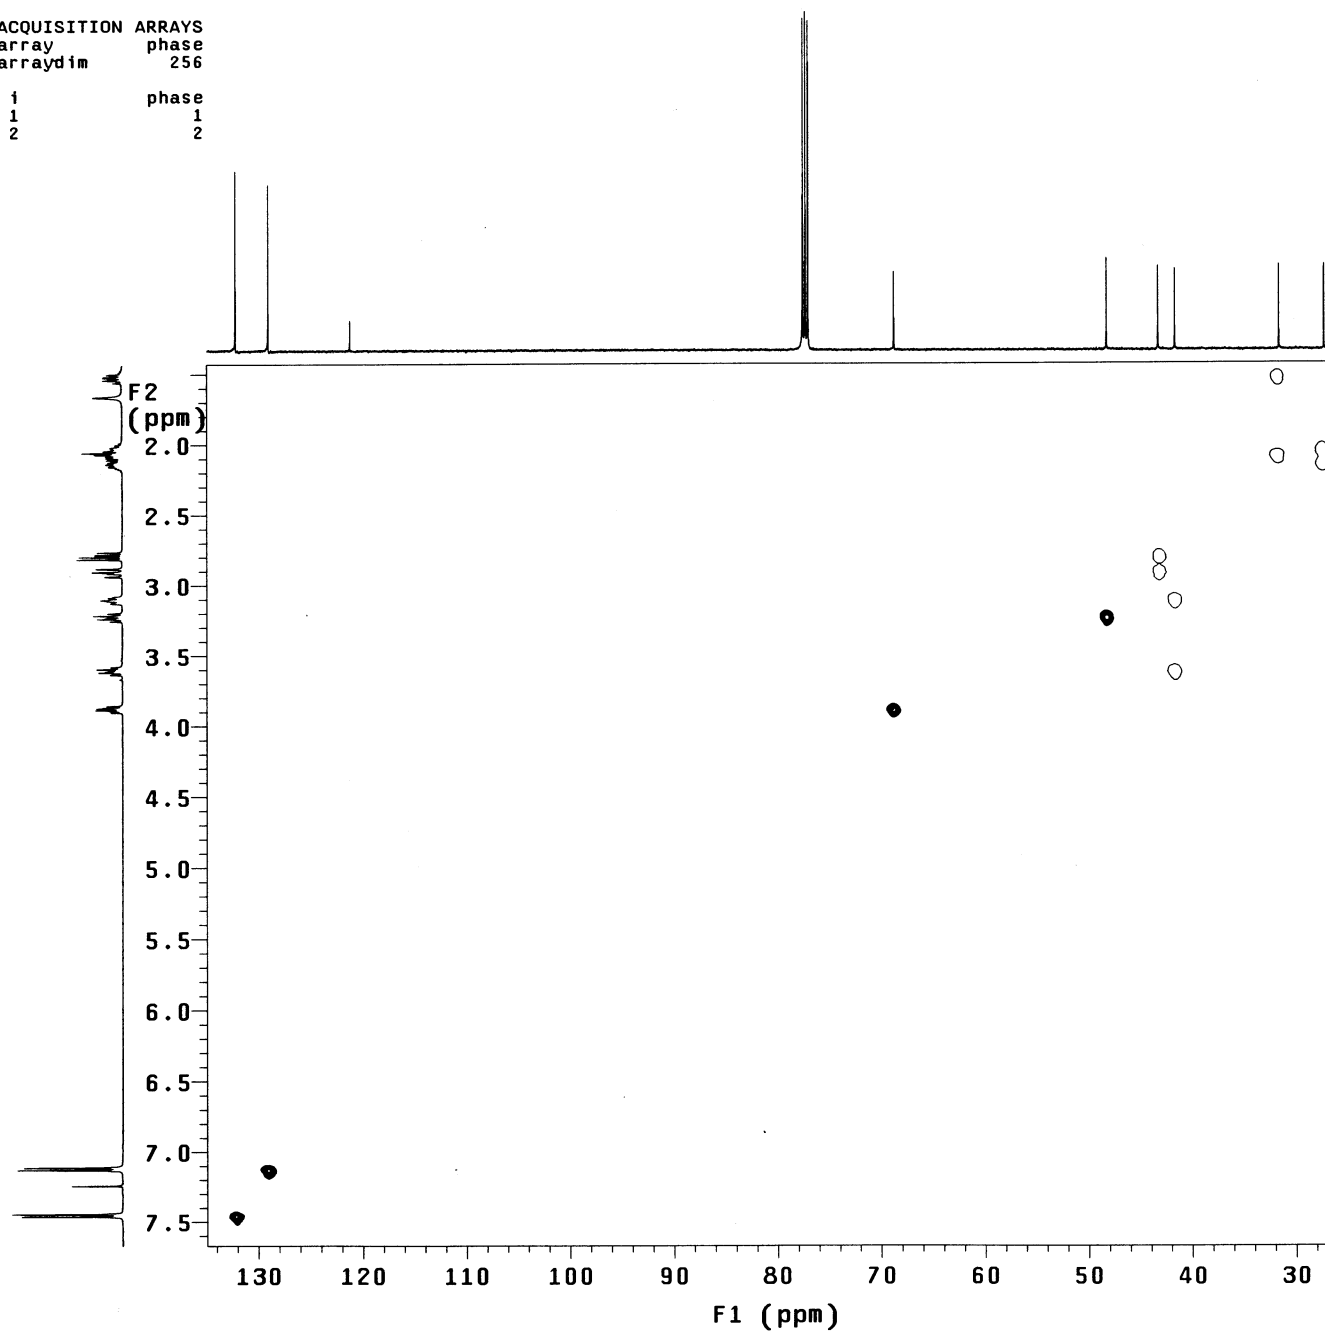

Fig S147. COSY of compound syn-4d

LCH-02-355

exp74 gCOSY

| SAMPLE         |            | FLAGS         |          |
|----------------|------------|---------------|----------|
| date           | Jan 6 2015 | hs            | nn       |
| solvent        | cdcl3      | sspu1         | n        |
| sample         | undefined  | hs9lv1        | 1004     |
| ACQUISITION    |            | SPECIAL       |          |
| sw             | 4001.6     | temp          | not used |
| at             | 0.128      | gain          | 34       |
| np             | 1024       | spin          | 0        |
| fb             | not used   | F2 PROCESSING |          |
| ss             | 16         | sb            | -0.064   |
| d1             | 1.000      | sbs           | not used |
| nt             | 8          | fn            | 1024     |
| 2D ACQUISITION |            | F1 PROCESSING |          |
| sw1            | 4001.6     | sb1           | -0.032   |
| ni             | 128        | sbs1          | not used |
| TRANSMITTER    |            | PROC1         |          |
| tn             | H1         | fn1           | 1024     |
| sfrq           | 499.832    | DISPLAY       |          |
| tof            | -499.9     | sp            | 348.4    |
| tpwr           | 62         | wp            | 3540.5   |
| pw             | 13.800     | sp1           | 340.1    |
| GRADIENTS      |            | wp1           | 3548.3   |
| gzlv11         | 1004       | rf1           | 3637.7   |
| gt1            | 0.001000   | rff           | 3618.8   |
| gstab          | 0.000500   | rff1          | 3638.2   |
| DECOUPLER      |            | rff1          | 3618.8   |
| dn             | C13        | PLOT          |          |
| dm             | nnn        | wc            | 155.0    |
|                |            | sc            | 10.0     |
|                |            | wc2           | 155.0    |
|                |            | sc2           | 0        |
|                |            | vs            | 232      |
|                |            | th            | 9        |
|                |            | ai            | cdc av   |

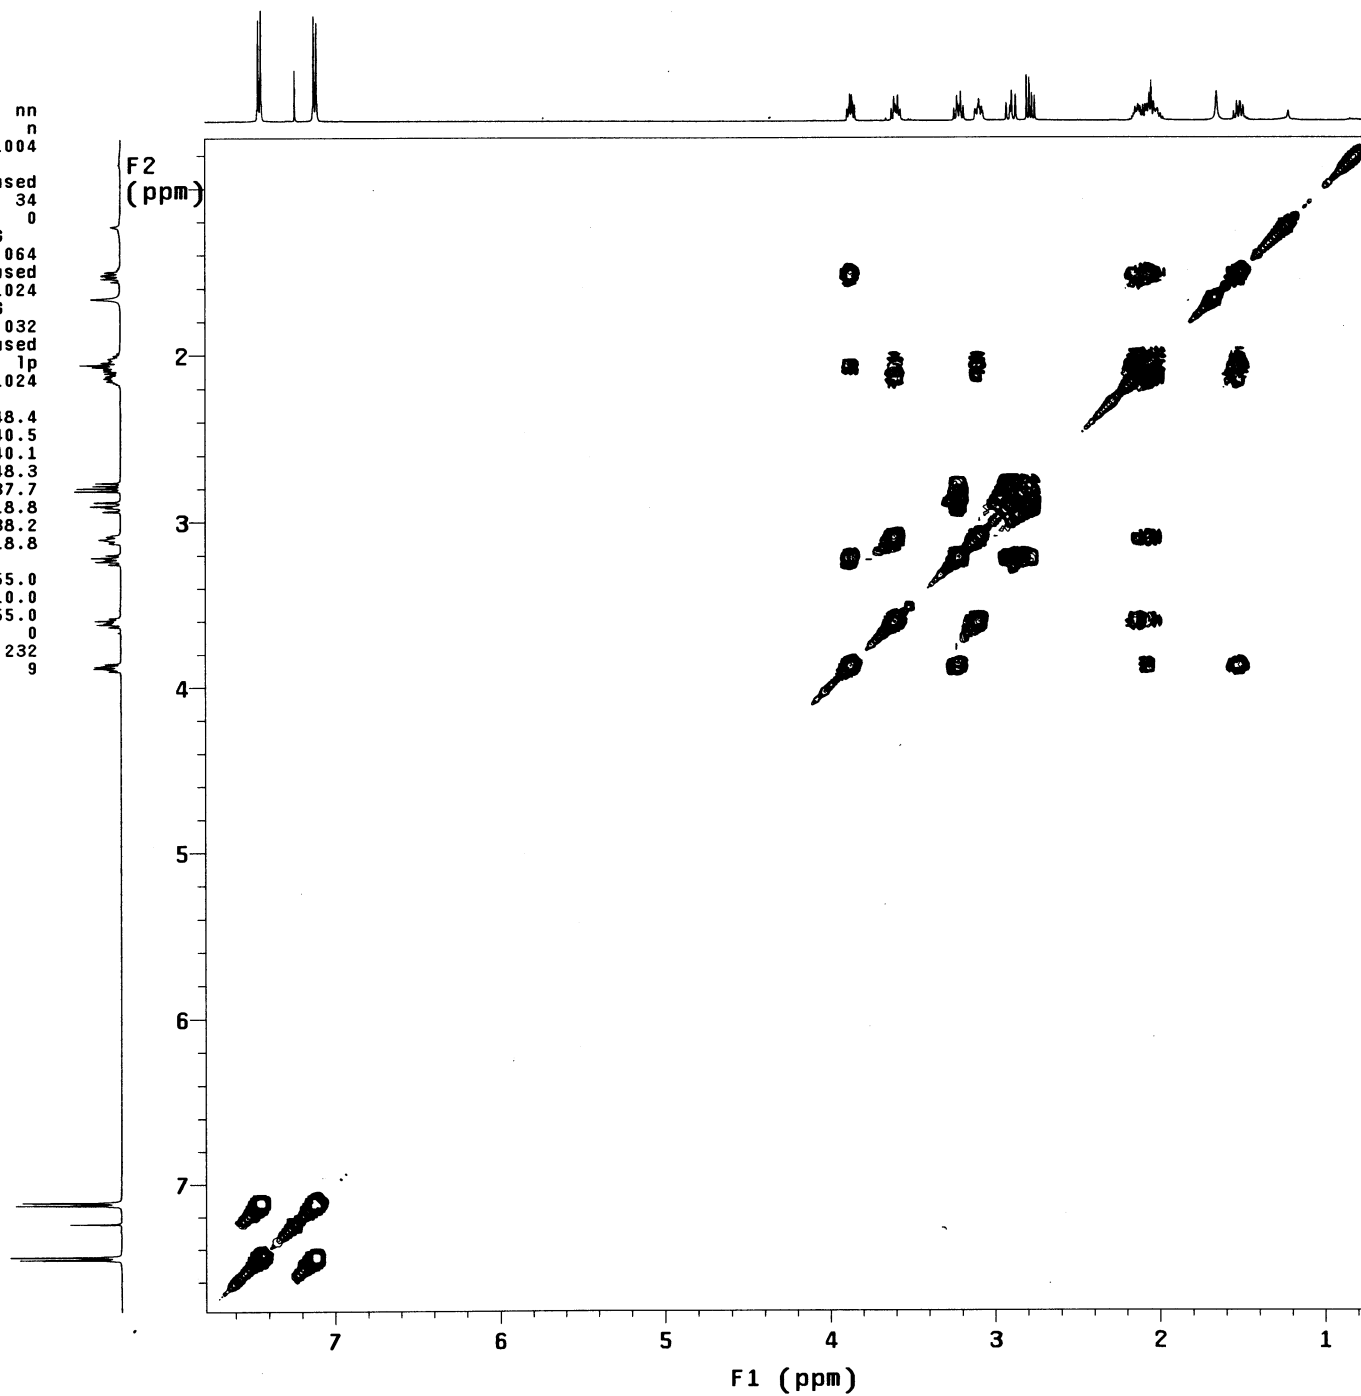

Fig S148. NOESY of compound syn-4d

LCH-02-355

exp75 NOESY

| SAMPLE         |            | FLAGS         |          |
|----------------|------------|---------------|----------|
| date           | Jan 6 2015 | hs            | n        |
| solvent        | cdcl3      | sspul         | y        |
| sample         | undefined  | PFGflg        | y        |
| ACQUISITION    |            | hsglv1        | 1004     |
| sw             | 4001.6     | SPECIAL       |          |
| at             | 0.128      | temp          | not used |
| np             | 1024       | gain          | 34       |
| fb             | not used   | spin          | 0        |
| ss             | 32         | F2 PROCESSING |          |
| d1             | 1.000      | gf            | 0.059    |
| nt             | 16         | gfs           | not used |
| 2D ACQUISITION |            | fn            | 1024     |
| sw1            | 4001.6     | F1 PROCESSING |          |
| ni             | 200        | gf1           | 0.046    |
| TRANSMITTER    |            | gfs1          | not used |
| tn             | H1         | proc1         | lp       |
| sfrq           | 499.832    | fn1           | 1024     |
| tof            | -499.9     | DISPLAY       |          |
| tpwr           | 62         | sp            | 423.4    |
| pw             | 13.800     | wp            | 3446.7   |
| NOESY          |            | sp1           | 421.6    |
| mix            | 0.600      | wp1           | 3438.9   |
| PRESATURATION  |            | rfl           | 3633.1   |
| satmode        | nnnn       | rfl1          | 3618.8   |
| satpwr         | 0          | rfl11         | 3634.8   |
| satdly         | 0          | rfl11         | 3618.8   |
| satfrq         | 0          | PLOT          |          |
| DECOUPLER      |            | wc            | 155.0    |
| dn             | C13        | sc            | 10.0     |
| dm             | nnn        | wc2           | 155.0    |
|                |            | sc2           | 0        |
|                |            | vs            | 232      |
|                |            | th            | 2        |
|                |            | al            | ph       |

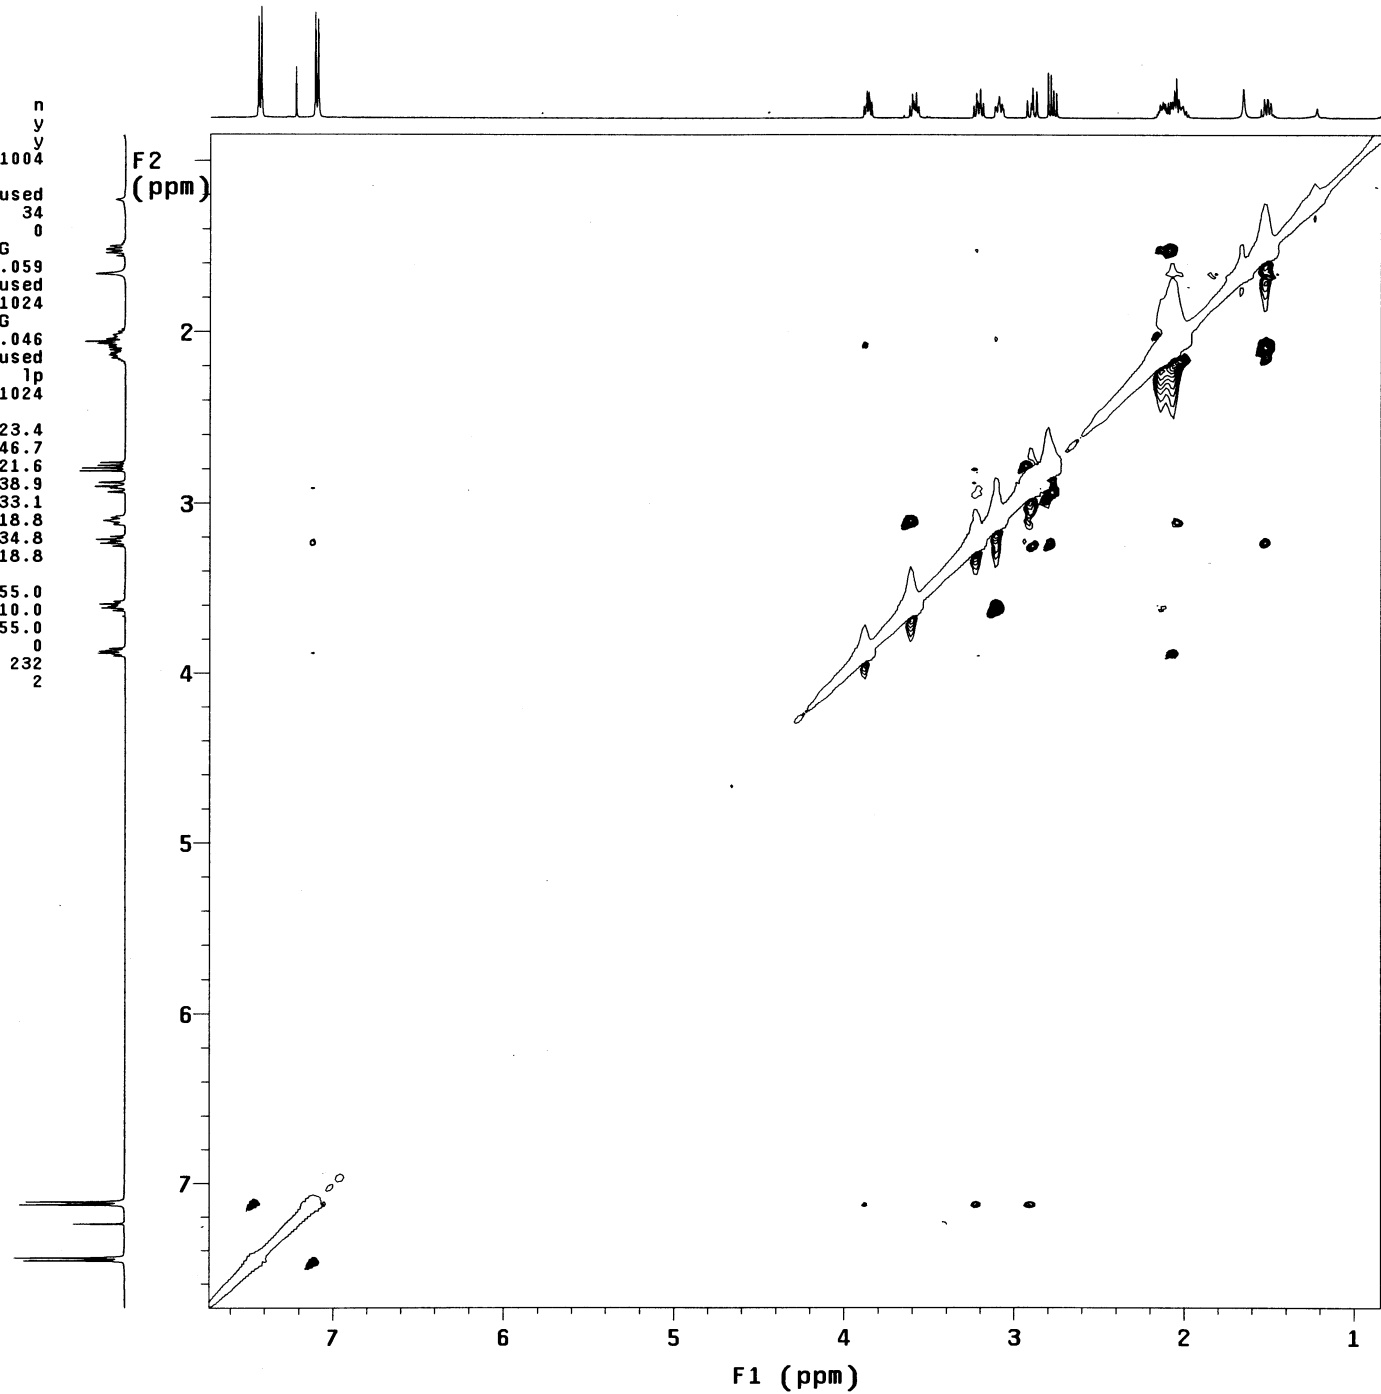



Fig S149. <sup>1</sup>H NMR (CDCl<sub>3</sub>, 500 MHz) of compound syn-4e

LCH-02-358

exp60 s2pu1

|             |             |            |          |
|-------------|-------------|------------|----------|
| SAMPLE      |             | DEC. & VT  |          |
| date        | Jan 22 2015 | dfrq       | 125.694  |
| solvent     | cdc13       | dn         | C13      |
| file        | exp         | dpwr       | 30       |
| ACQUISITION |             | dof        | 0        |
| sfrq        | 499.833     | dm         | nnn      |
| tn          | H1          | dmm        | c        |
| at          | 3.000       | dmf        | 200      |
| np          | 48000       | dseq       |          |
| sw          | 8000.0      | dres       | 1.0      |
| fb          | not used    | homo       | n        |
| bs          | 4           | PROCESSING |          |
| tpwr        | 62          | wtfile     |          |
| pw          | 4.8         | proc       | ft       |
| d1          | 1.000       | fn         | not used |
| tof         | 499.7       | math       | f        |
| nt          | 4           |            |          |
| ct          | 4           | werr       | react    |
| alock       | y           | wexp       | procplot |
| gain        | not used    | wbs        |          |
| FLAGS       |             | wnt        | wft      |
| il          | n           |            |          |
| in          | n           |            |          |
| dp          | y           |            |          |
| hs          | nn          |            |          |
| DISPLAY     |             |            |          |
| sp          | -0.1        |            |          |
| wp          | 5997.8      |            |          |
| vs          | 138         |            |          |
| sc          | 0           |            |          |
| wc          | 210         |            |          |
| hzmm        | 28.56       |            |          |
| is          | 0.00        |            |          |
| rfl         | 4635.7      |            |          |
| rfp         | 3618.8      |            |          |
| th          | 2           |            |          |
| ins         | 100.000     |            |          |
| nm          | cdc ph      |            |          |

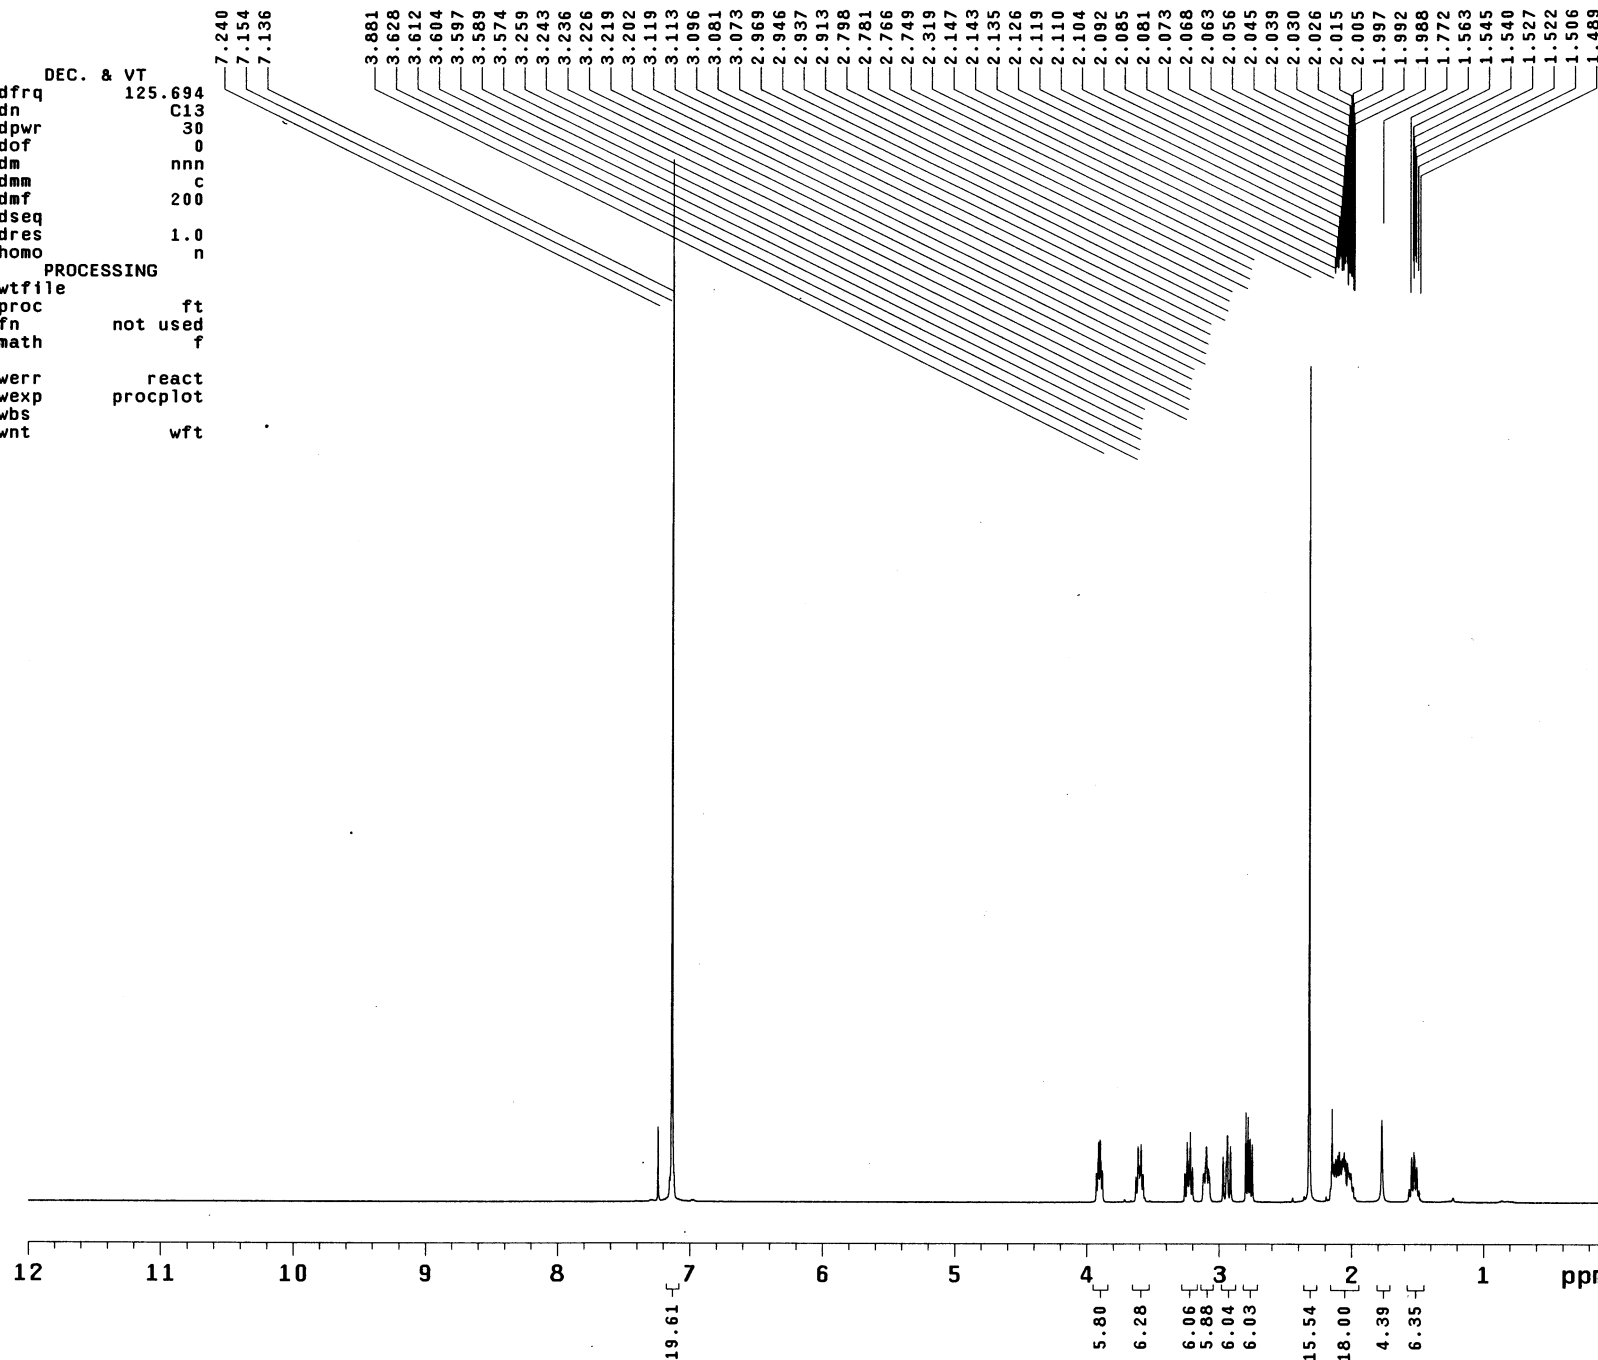

LCH-02-358

exp61 s2pu1

```

SAMPLE          DEC. & VT
date  Jan 22 2015  dfrq      499.833
solvent  cdc13      dn        H1
file     exp        dpwr      44
          ACQUISITION  dof        0
sfrq     125.696    dm         yyy
tn       C13       dmm        w
at       1.000     dmf       8868
np       60332     dseq
sw       30165.9   dres      1.0
fb       not used  homo      n
bs       4         PROCESSING
tpwr     59        lb        1.00
pw       4.8       wtfile
d1       1.000     proc      ft
tof      1883.7    fn       131072
nt       5000     math      f
ct       5000
alock    not used  werr      react
gain     not used  wexp     procplot
          FLAGS    wbs     testsn
il        n        wnt     wft
in        n
dp        y
hs        nn

DISPLAY
sp      -1257.2
wp      28906.5
vs      128
sc       0
wc      210
hzmm    137.65
is      33.57
rfl     10971.6
rfp     9677.5
th       3
ins     100.000
nm  cdc  ph

```

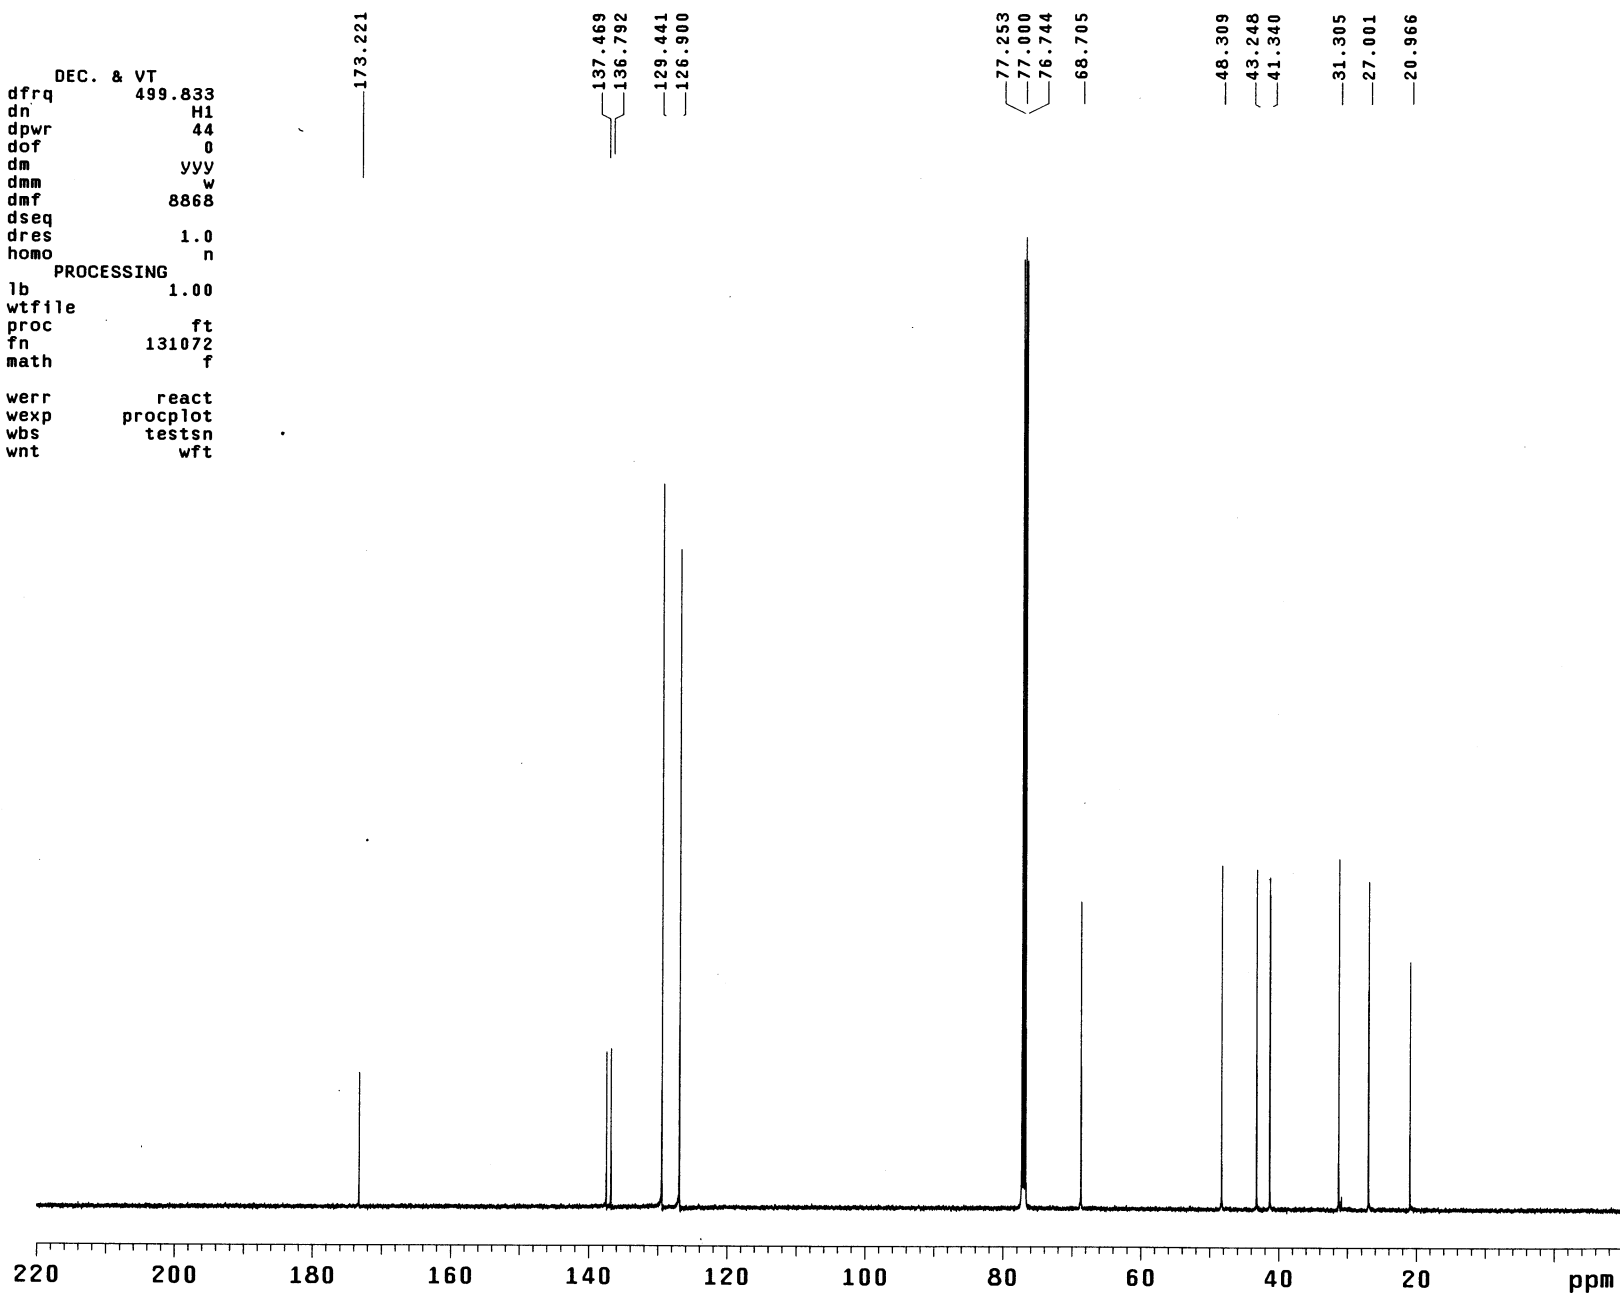Fig S150. <sup>13</sup>C NMR (CDCl<sub>3</sub>, 125 MHz) of compound syn-4e

Fig S151. DEPT of compound syn-4e

LCH-02-358  
exp62 DEPT

|             |             |               |                    |
|-------------|-------------|---------------|--------------------|
| SAMPLE      |             | DEPT          | ACQUISITION ARRAYS |
| date        | Jan 22 2015 | j1xh 140.0    | array mult         |
| solvent     | cdcl3       | mult arrayed  | arraydim 3         |
| sample      | undefined   | SPECIAL       |                    |
| ACQUISITION |             | temp not used | i mult             |
| sw          | 30165.9     | gain 34       | 1 0.5              |
| at          | 1.000       | spin 0        | 2 1                |
| np          | 60332       | PROCESSING    | 3 1.5              |
| bs          | 4           | lb 1.00       |                    |
| ss          | -4          | fn 131072     |                    |
| di          | 1.000       | SPECTRUM      |                    |
| nt          | 2500        | wp 28906.5    |                    |
| ct          | 2500        | sp -1257.2    |                    |
| TRANSMITTER |             | rp -167.3     |                    |
| tn          | C13         | lp 248.4      |                    |
| tof         | 1883.7      | ai cdc ph     |                    |
| tpwr        | 59          | REFERENCE     |                    |
| pw          | 14.700      | rfl 1294.1    |                    |
| DECOUPLER   |             | rfl 0         |                    |
| dn          | H1          | PLOT          |                    |
| dof         | 0           | wc 210        |                    |
| dpwr        | 44          | sc 0          |                    |
| dm          | nny         | vs 300        |                    |
| dmm         | ccw         | hzmm 137.65   |                    |
| dmf         | 8868        | th 7          |                    |
| pp1v1       | 59          |               |                    |
| pp          | 21.200      |               |                    |

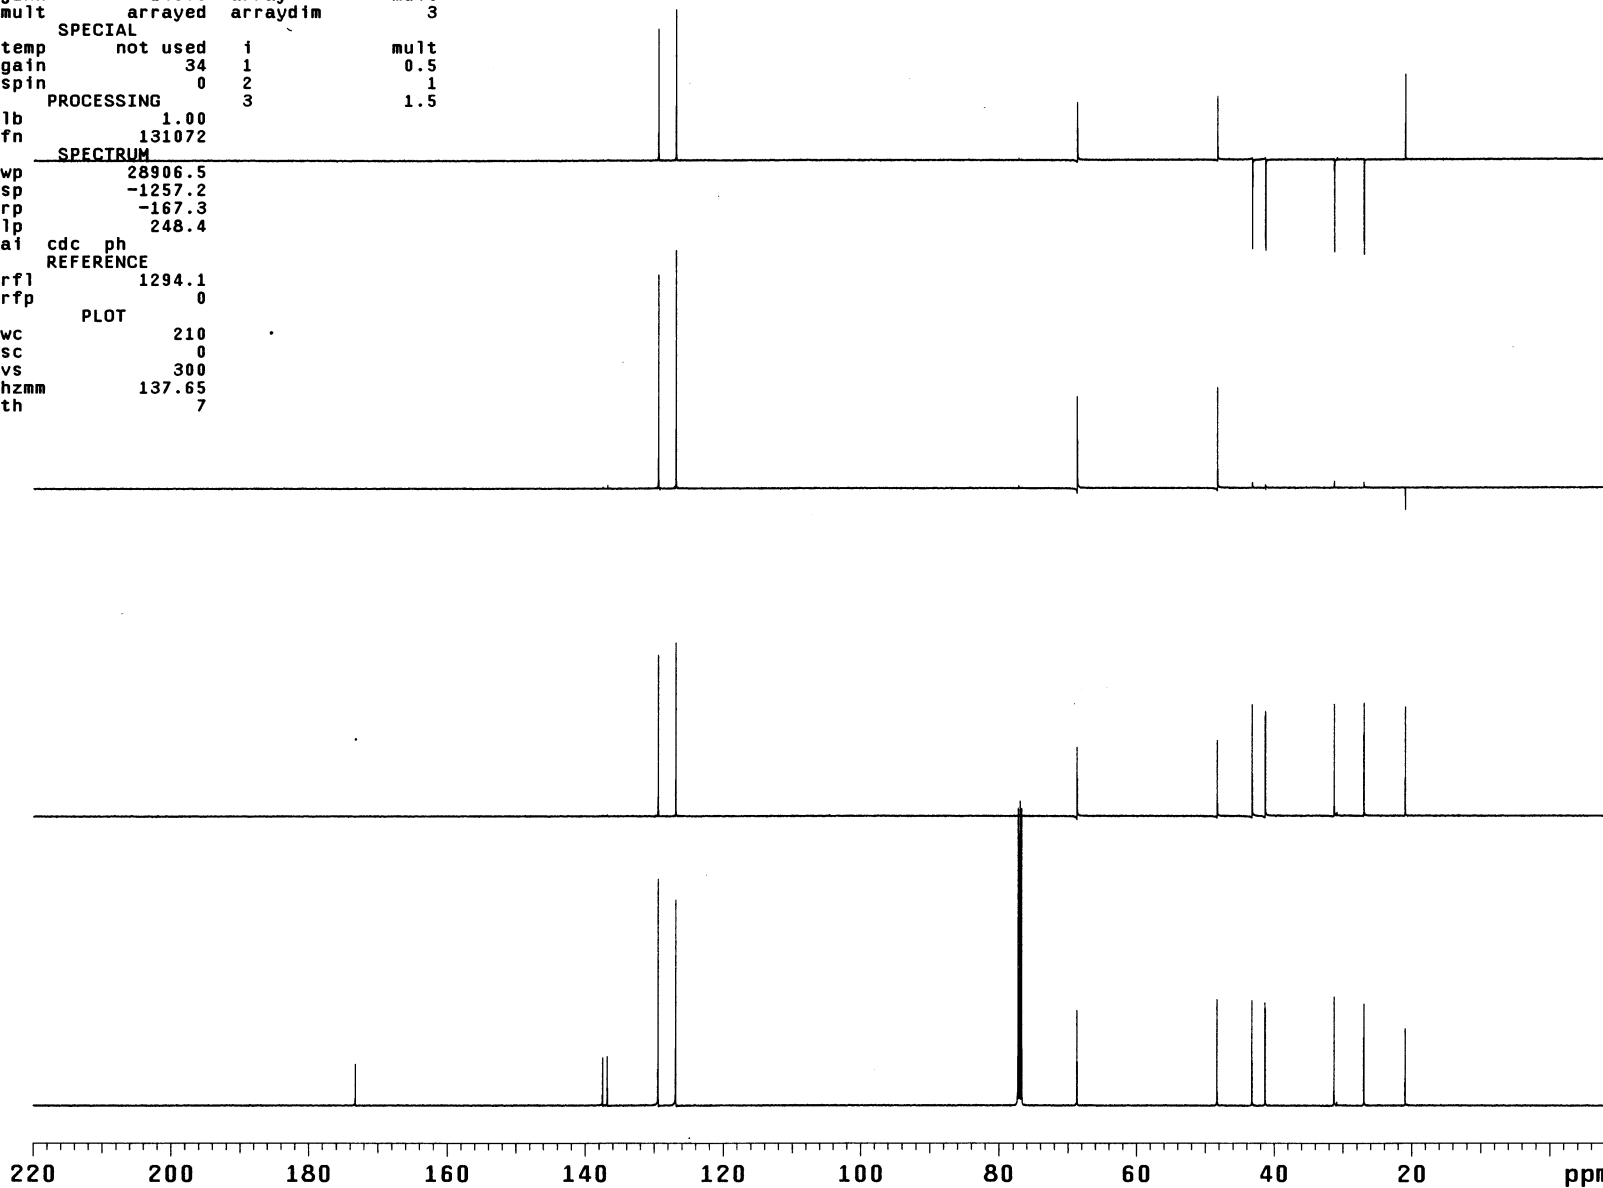

Fig S152. HSQC of compound syn-4e

LCH-02-358

exp65 gHSQC

| SAMPLE         |             | FLAGS         | ACQUISITION | ARRAYS   |
|----------------|-------------|---------------|-------------|----------|
| date           | Jan 22 2015 | hs            | n           | array    |
| solvent        | cdcl3       | sspul         | y           | arraydim |
| sample         | undefined   | PFGflg        | y           | phase    |
| ACQUISITION    |             | hsglv1        | 1004        | 1        |
| sw             | 4001.6      | SPECIAL       | 1           | 2        |
| at             | 0.128       | temp          | not used    |          |
| np             | 1024        | gain          | 54          |          |
| fb             | not used    | spin          | 0           |          |
| ss             | 32          | GRADIENTS     |             |          |
| d1             | 1.000       | gzlv11        | 1004        |          |
| nt             | 8           | gt1           | 0.002000    |          |
| 2D ACQUISITION |             | gzlv13        | 505         |          |
| sw1            | 21367.5     | gt3           | 0.001000    |          |
| n1             | 128         | gstab         | 0.000500    |          |
| phase          | arrayed     | F2 PROCESSING |             |          |
| TRANSMITTER    |             | gf            | 0.059       |          |
| tn             | H1          | gfs           | not used    |          |
| sfrq           | 499.832     | fn            | 1024        |          |
| tof            | -499.9      | F1 PROCESSING |             |          |
| tpwr           | 62          | gf1           | 0.006       |          |
| pw             | 13.800      | gfs1          | not used    |          |
| DECOUPLER      |             | proc1         | 1p          |          |
| dn             | C13         | fn1           | 2048        |          |
| dof            | -2515.1     | DISPLAY       |             |          |
| dm             | nny         | sp            | 694.4       |          |
| dmm            | ccp         | wp            | 3009.0      |          |
| dmf            | 32258       | sp1           | 2123.2      |          |
| dpwr           | 43          | wp1           | 14523.2     |          |
| pxvlv1         | 61          | rf1           | 1175.9      |          |
| pxw            | 11.000      | rfp           | 1159.1      |          |
| HSQC           |             | rf11          | 3934.0      |          |
| j1xh           | 140.0       | rfp1          | 2635.1      |          |
| nullflg        | y           | PLOT          |             |          |
| mult           | 2           | wc            | 150.0       |          |
|                |             | sc            | 6.2         |          |
|                |             | wc2           | 116.2       |          |
|                |             | sc2           | 0           |          |
|                |             | vs            | 1290        |          |
|                |             | th            | 5           |          |
|                |             | ai            | cdc         | ph       |

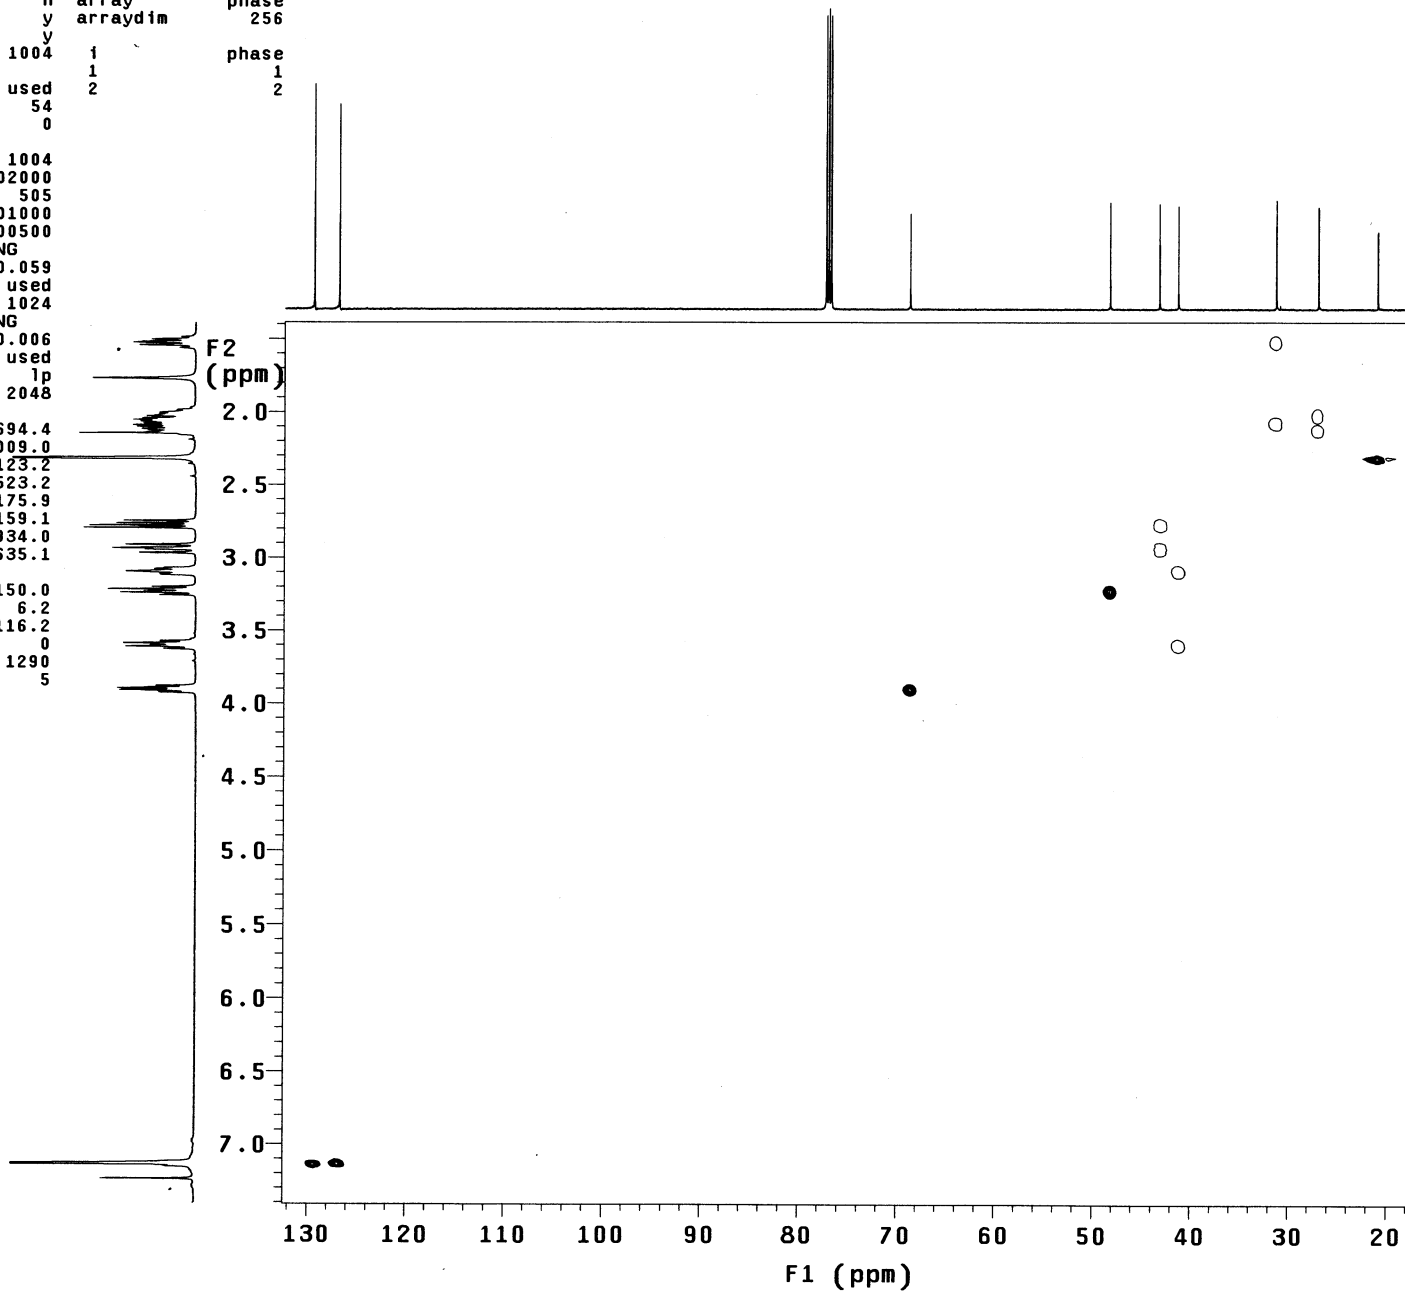

LCH-02-358

exp63 gCOSY

| SAMPLE         |             | FLAGS         |          |
|----------------|-------------|---------------|----------|
| date           | Jan 22 2015 | hs            | nn       |
| solvent        | cdc13       | sspul         | n        |
| sample         | undefined   | hsgivl        | 1004     |
| ACQUISITION    |             | SPECIAL       |          |
| sw             | 4001.6      | temp          | not used |
| at             | 0.128       | gain          | 34       |
| np             | 1024        | spin          | 0        |
| fb             | not used    | F2 PROCESSING |          |
| ss             | 16          | sb            | -0.064   |
| d1             | 1.000       | sbs           | not used |
| nt             | 8           | fn            | 1024     |
| 2D ACQUISITION |             | F1 PROCESSING |          |
| sw1            | 4001.6      | sb1           | -0.032   |
| n1             | 128         | sbs1          | not used |
| TRANSMITTER    |             | proc1         |          |
| tn             | H1          | fn1           | 1024     |
| sfrq           | 499.832     | DISPLAY       |          |
| tof            | -499.9      | sp            | 351.1    |
| tpwr           | 62          | wp            | 3392.0   |
| pw             | 13.800      | sp1           | 351.4    |
| GRADIENTS      |             | wp1           | 3392.0   |
| gzlv11         | 1004        | rf1           | 1175.3   |
| gt1            | 0.001000    | rfp           | 1159.1   |
| gstab          | 0.000500    | rf11          | 1175.1   |
| DECOUPLER      |             | rfp1          | 1159.1   |
| dn             | C13         | PLOT          |          |
| dm             | nnn         | wc            | 155.0    |
|                |             | sc            | 10.0     |
|                |             | wc2           | 155.0    |
|                |             | sc2           | 0        |
|                |             | vs            | 1290     |
|                |             | th            | 5        |
|                |             | ai            | cdc av   |

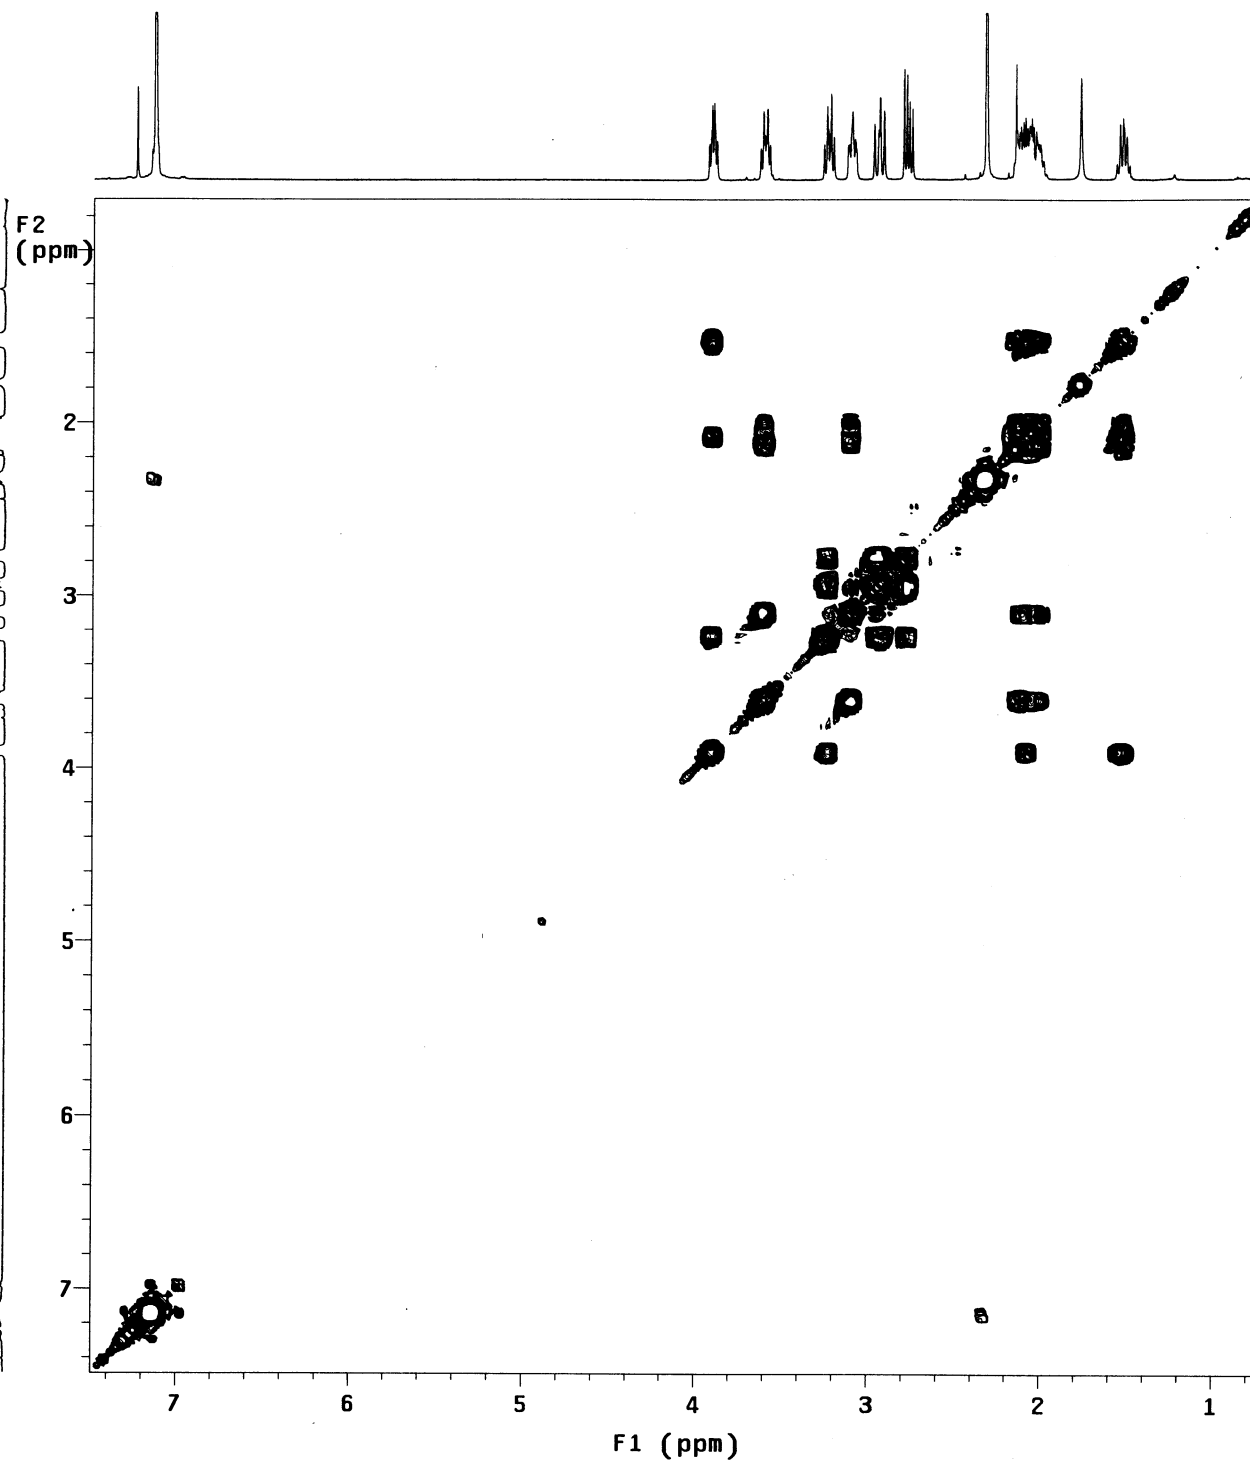

Fig S153. COESY of compound syn-4e

LCH-02-358

exp64 NOESY

| SAMPLE         |             | FLAGS         |          |
|----------------|-------------|---------------|----------|
| date           | Jan 22 2015 | hs            | n        |
| solvent        | cdcl3       | sspul         | y        |
| sample         | undefined   | PFgf1g        | y        |
| ACQUISITION    |             | hsglv1        | 1004     |
| sw             | 4001.6      | SPECIAL       |          |
| at             | 0.128       | temp          | not used |
| np             | 1024        | gain          | 34       |
| fb             | not used    | spin          | 0        |
| ss             | 32          | F2 PROCESSING |          |
| d1             | 1.000       | gf            | 0.059    |
| nt             | 16          | gfs           | not used |
| 2D ACQUISITION |             | fn            | 1024     |
| sw1            | 4001.6      | F1 PROCESSING |          |
| ni             | 200         | gf1           | 0.046    |
| TRANSMITTER    |             | gfs1          | not used |
| tn             | H1          | proc1         | 1p       |
| sfrq           | 499.832     | fn1           | 1024     |
| tof            | -499.9      | DISPLAY       |          |
| tpwr           | 62          | sp            | 367.1    |
| pw             | 13.800      | wp            | 3337.3   |
| NOESY          |             | sp1           | 358.1    |
| mix            | 0.600       | wp1           | 3337.3   |
| PRESATURATION  |             | rfl           | 1175.0   |
| satmode        | nnnn        | rfp           | 1159.1   |
| satpwr         | 0           | rfl1          | 1176.2   |
| satdly         | 0           | rfp1          | 1159.1   |
| satfrq         | 0           | PLOT          |          |
| DECOUPLER      |             | wc            | 155.0    |
| dn             | C13         | sc            | 10.0     |
| dm             | nnn         | wc2           | 155.0    |
|                |             | sc2           | 0        |
|                |             | vs            | 1290     |
|                |             | th            | 1        |
|                |             | ai            |          |
|                |             | ph            |          |

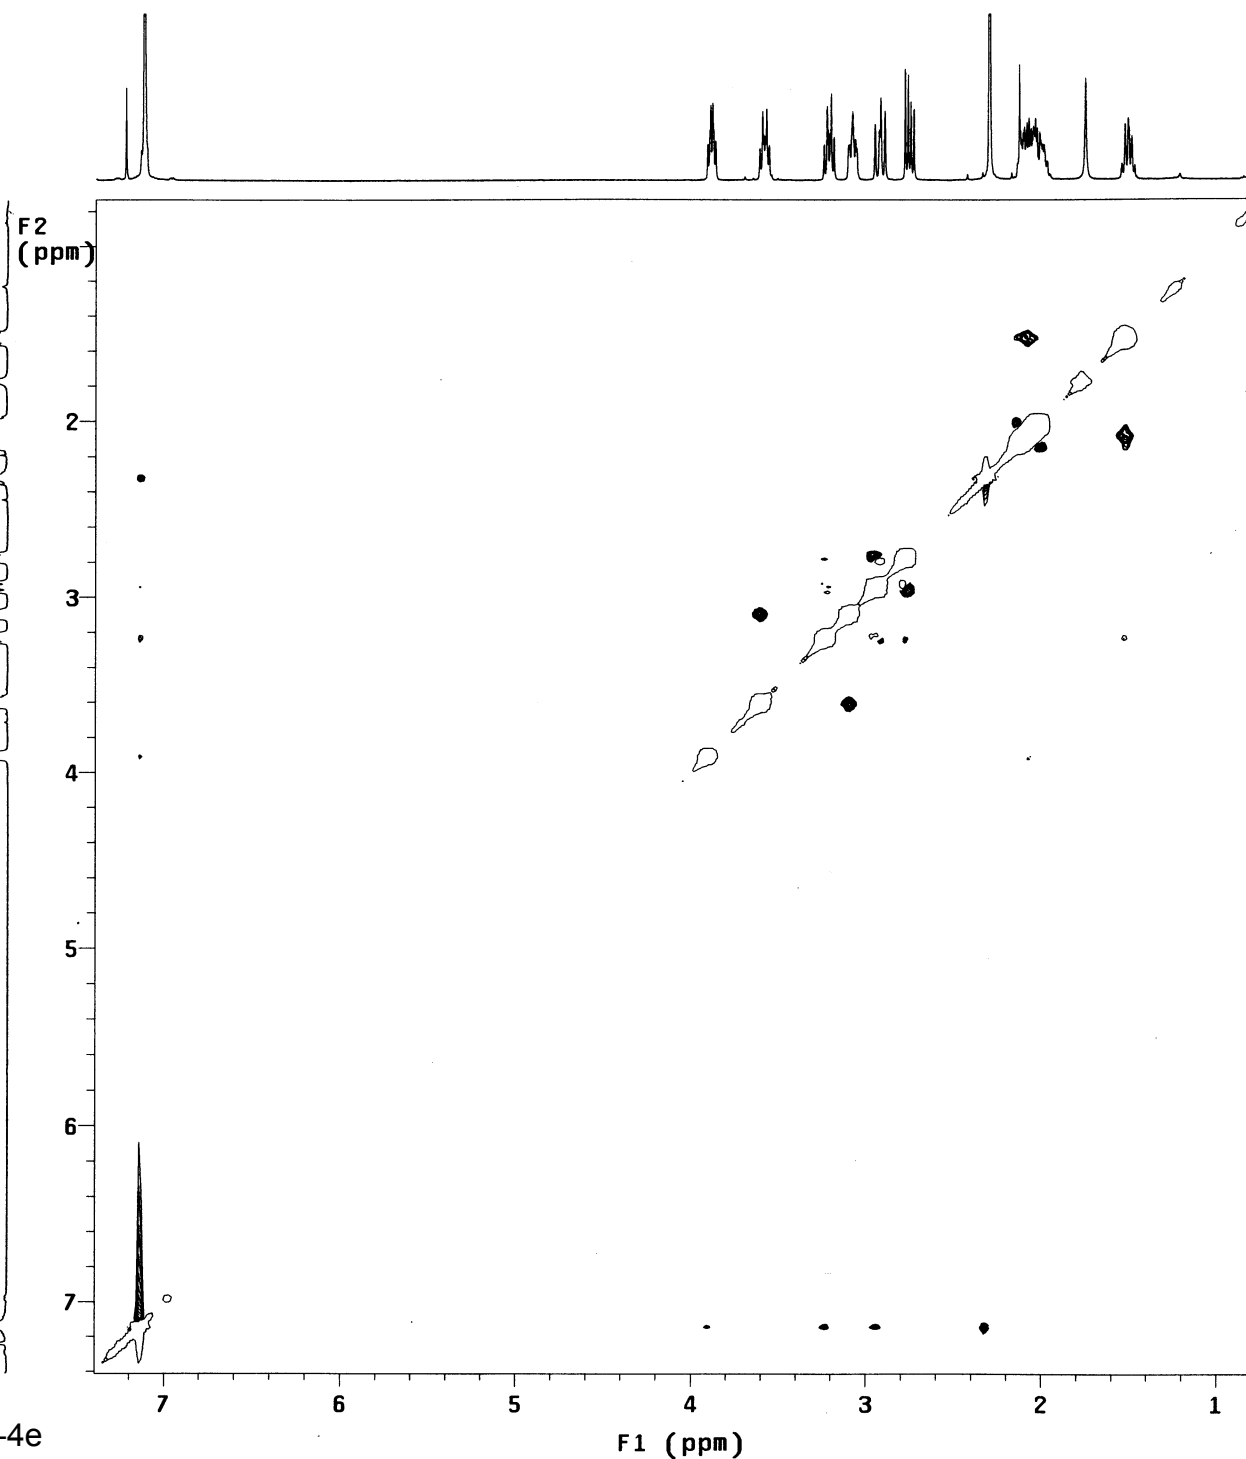

Fig S154. NOESY of compound syn-4e

LCH-02-405

Sample Name **LCH-02-405**  
Date collected **2015-05-13**Pulse sequence **PROTON**  
Solvent **cdcl3**Temperature **25**  
Spectrometer **Agilent-NMR-inova500**Study owner **vnmr2**  
Operator **vnmr2**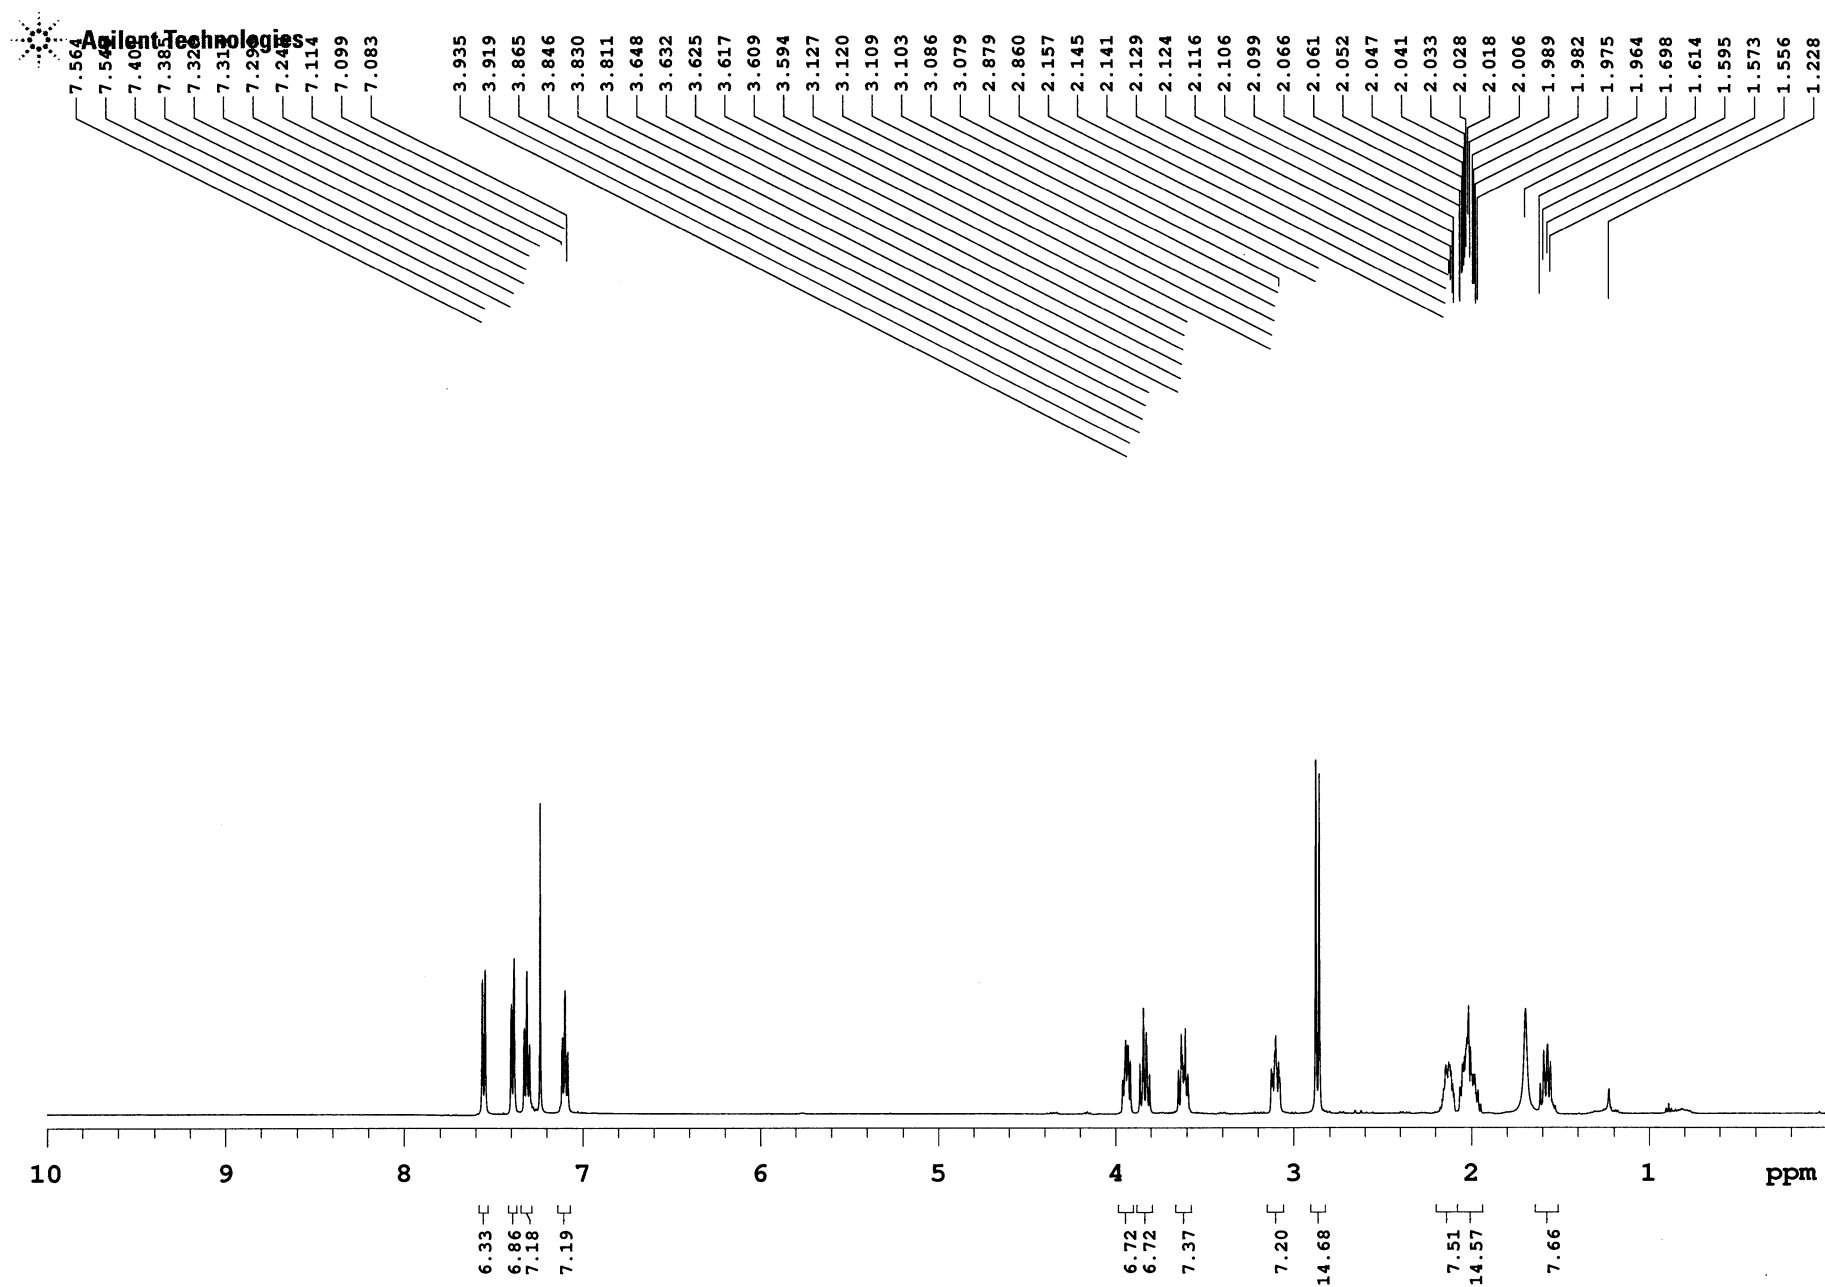

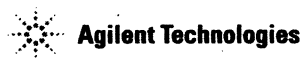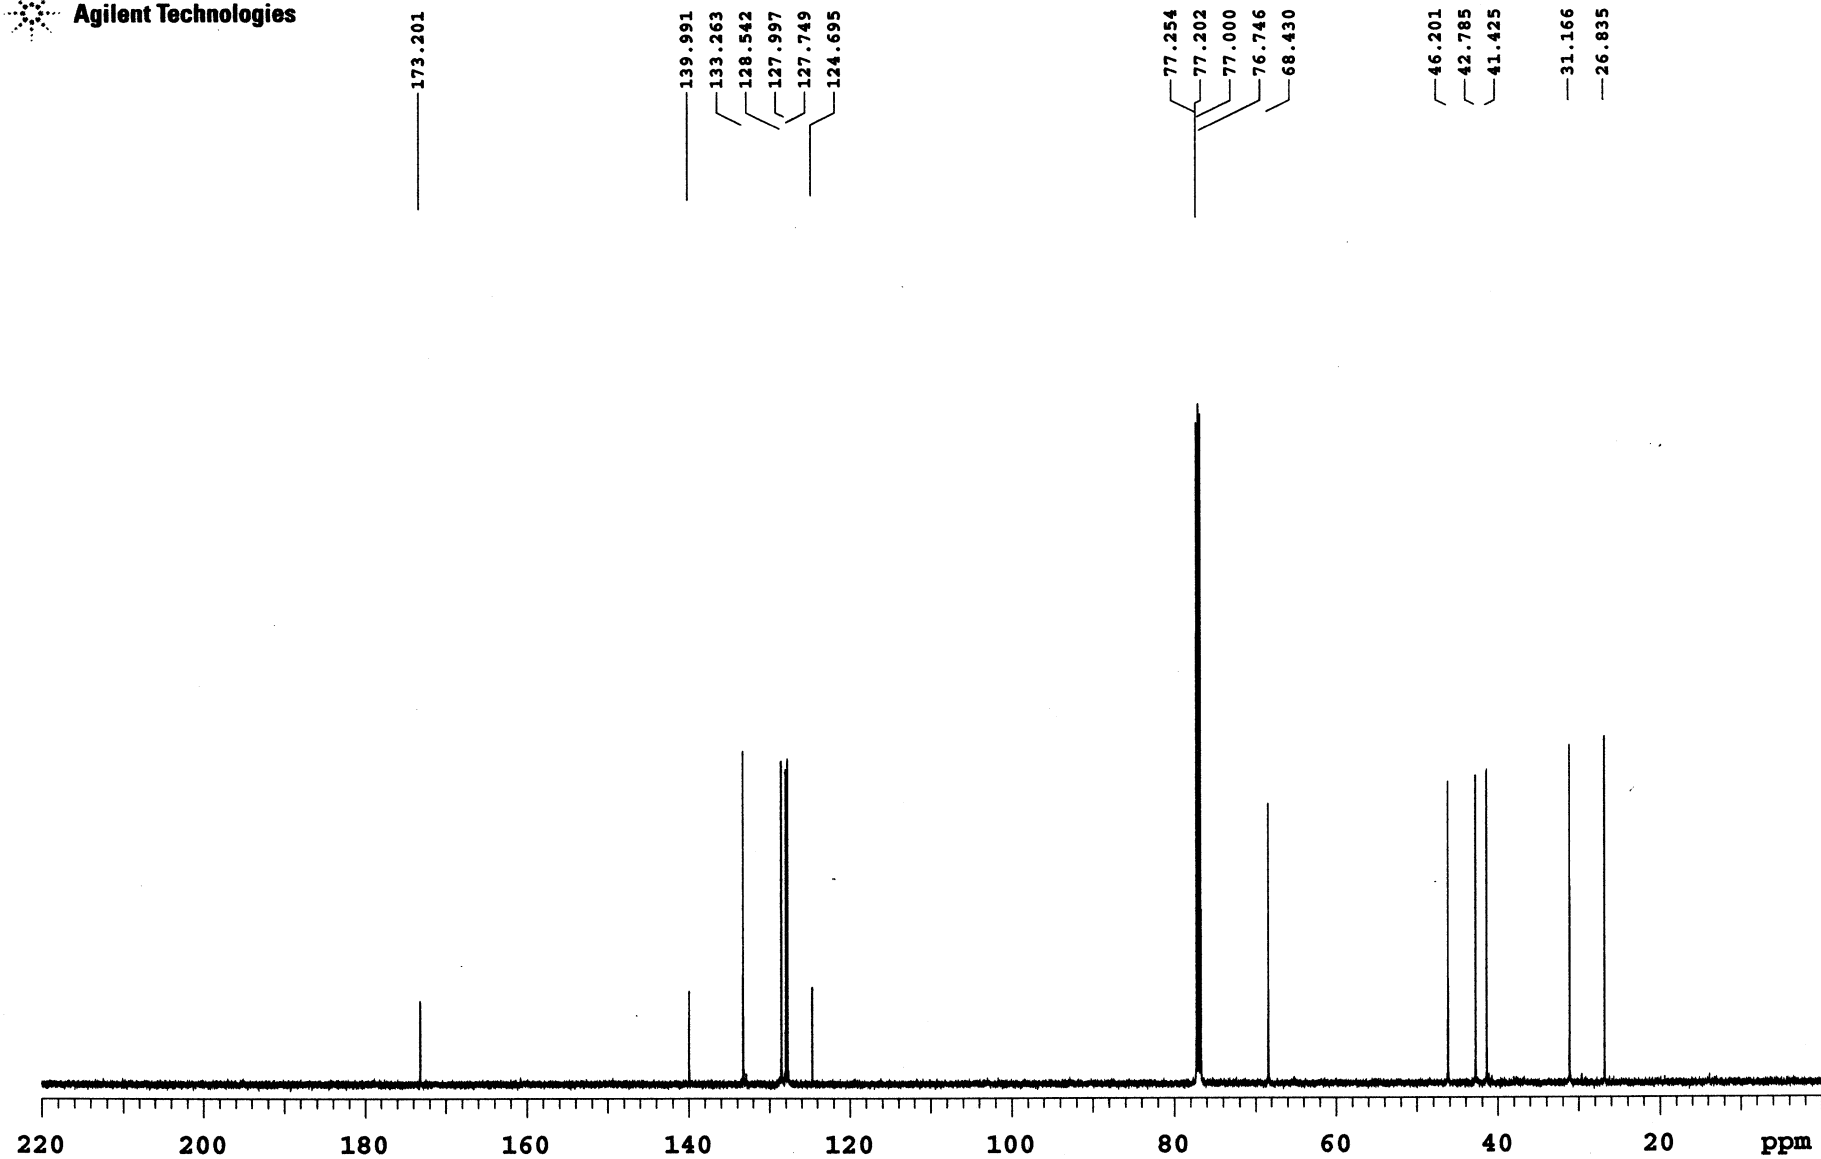



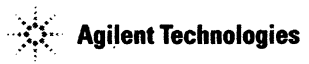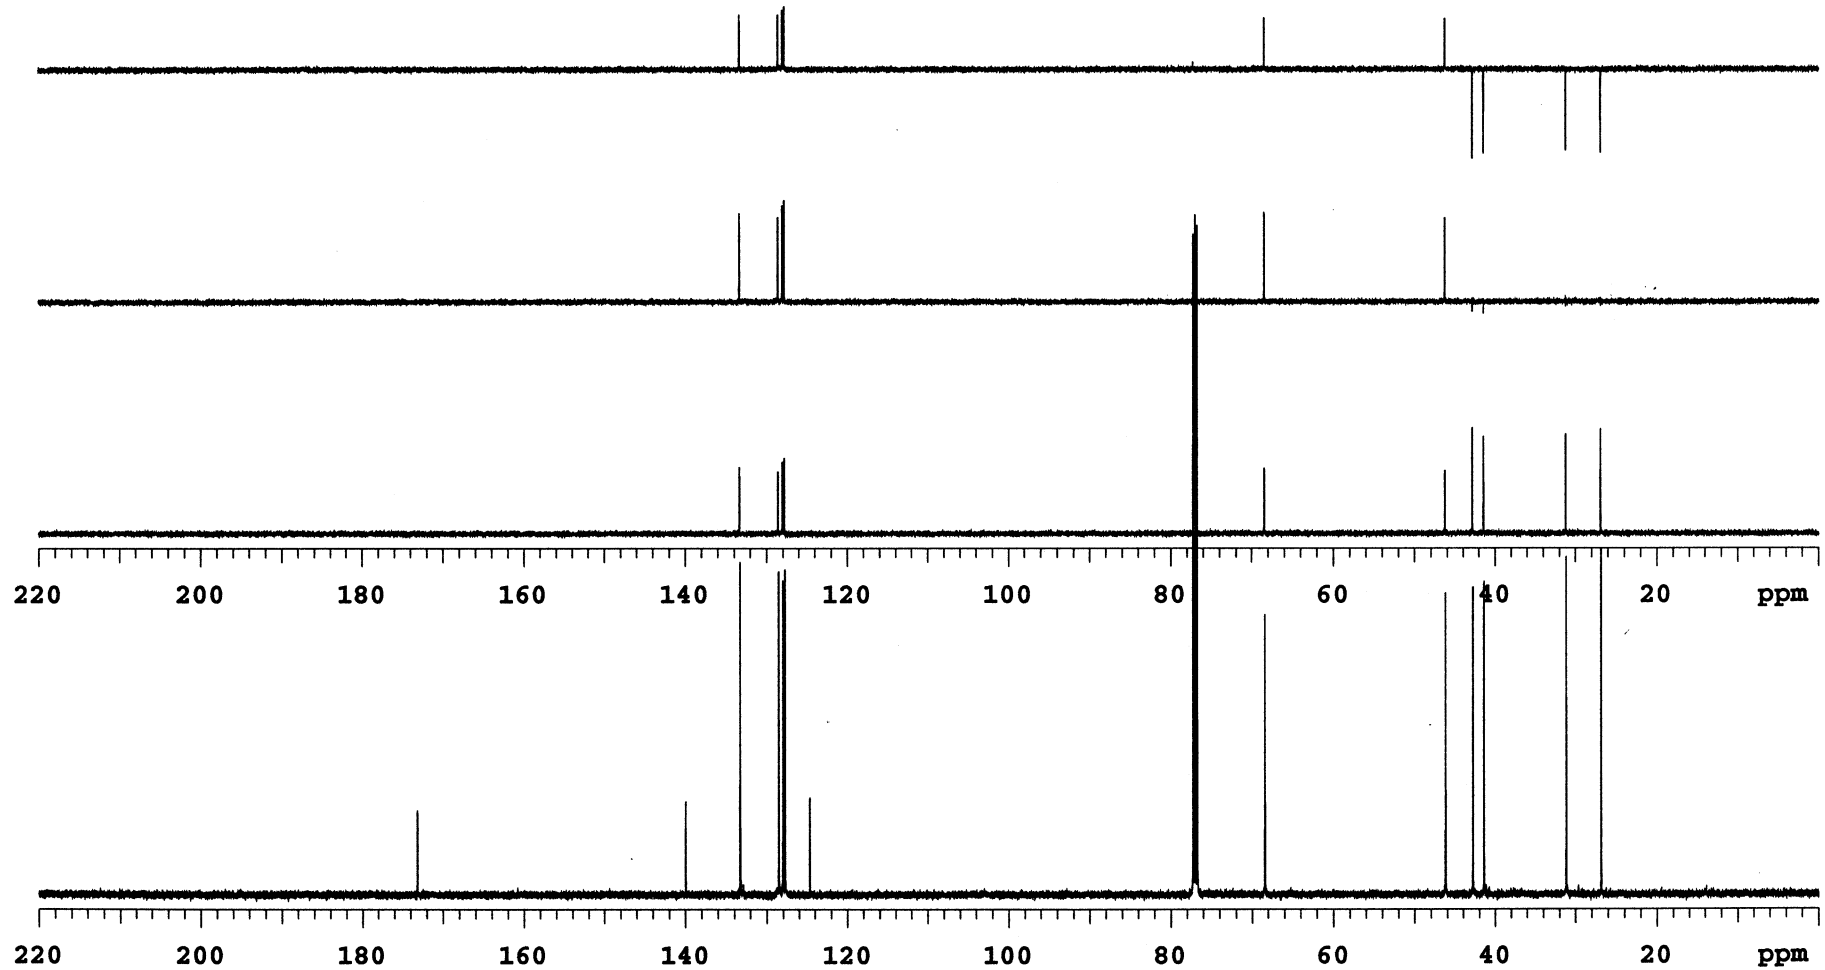

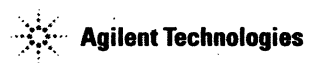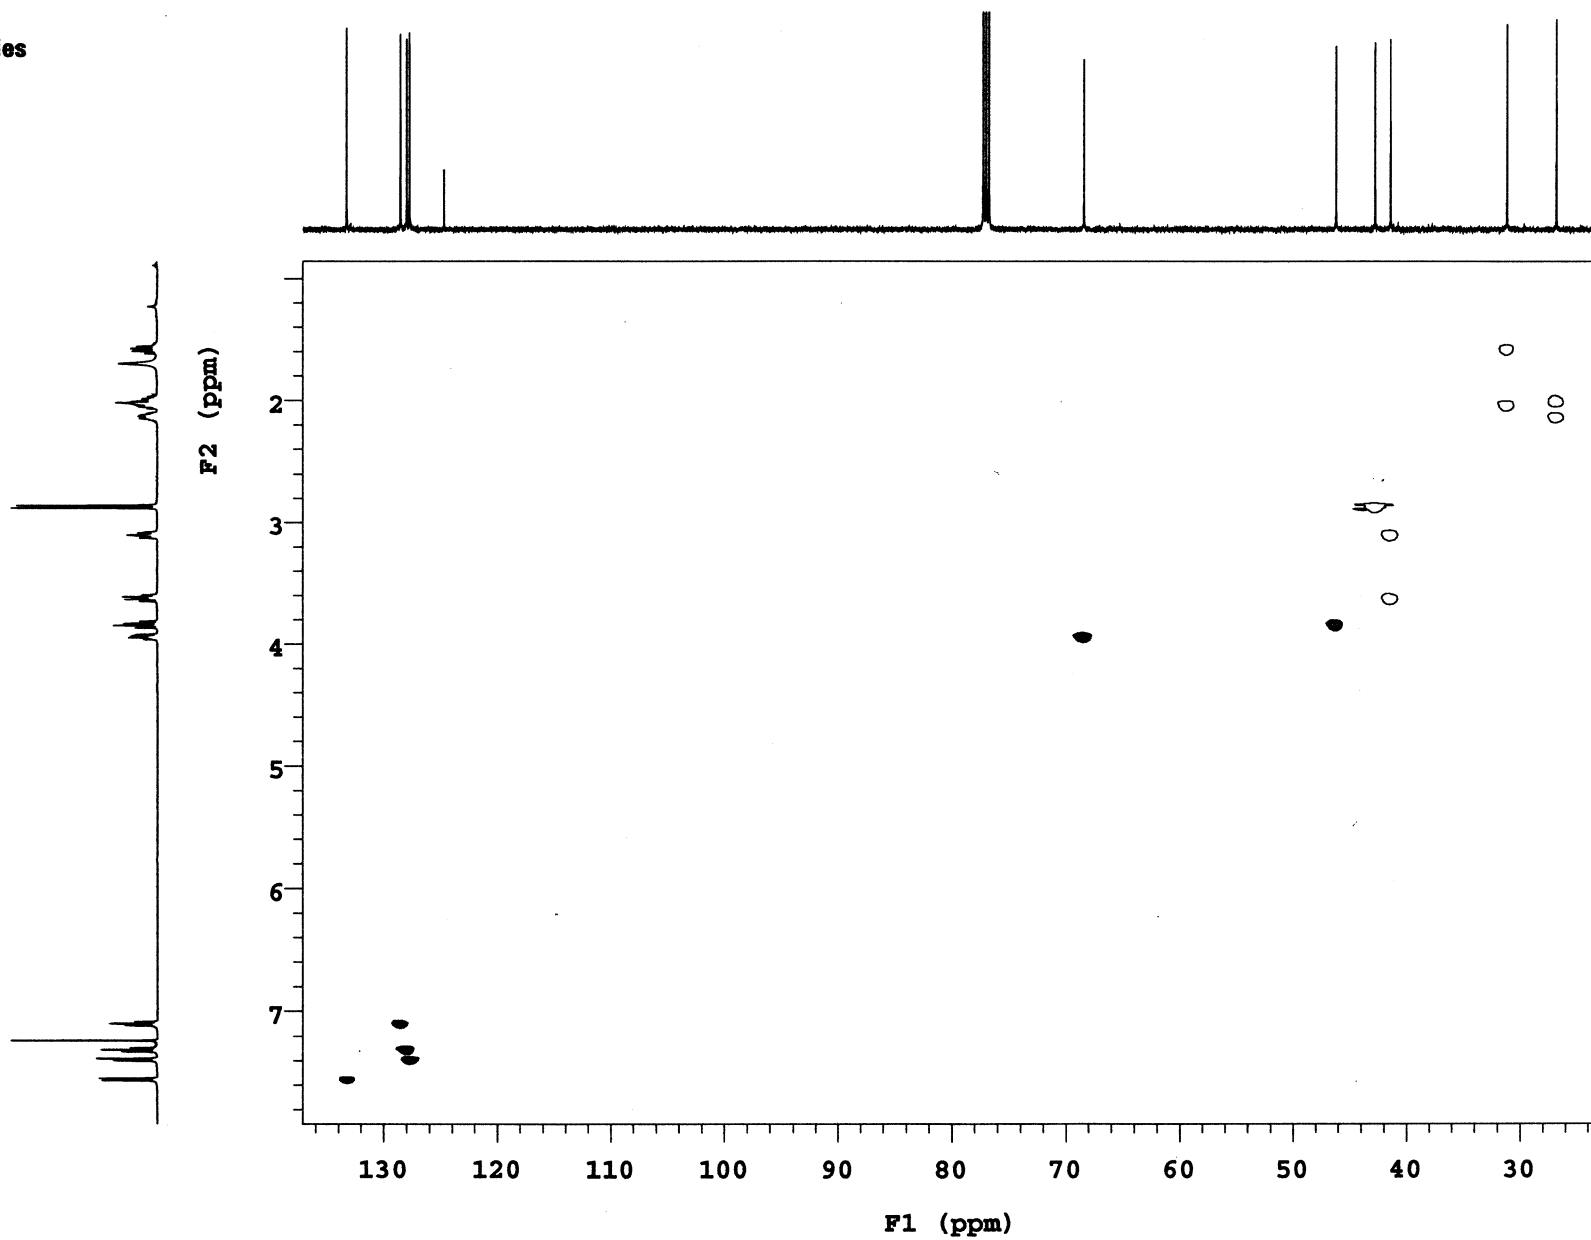

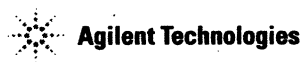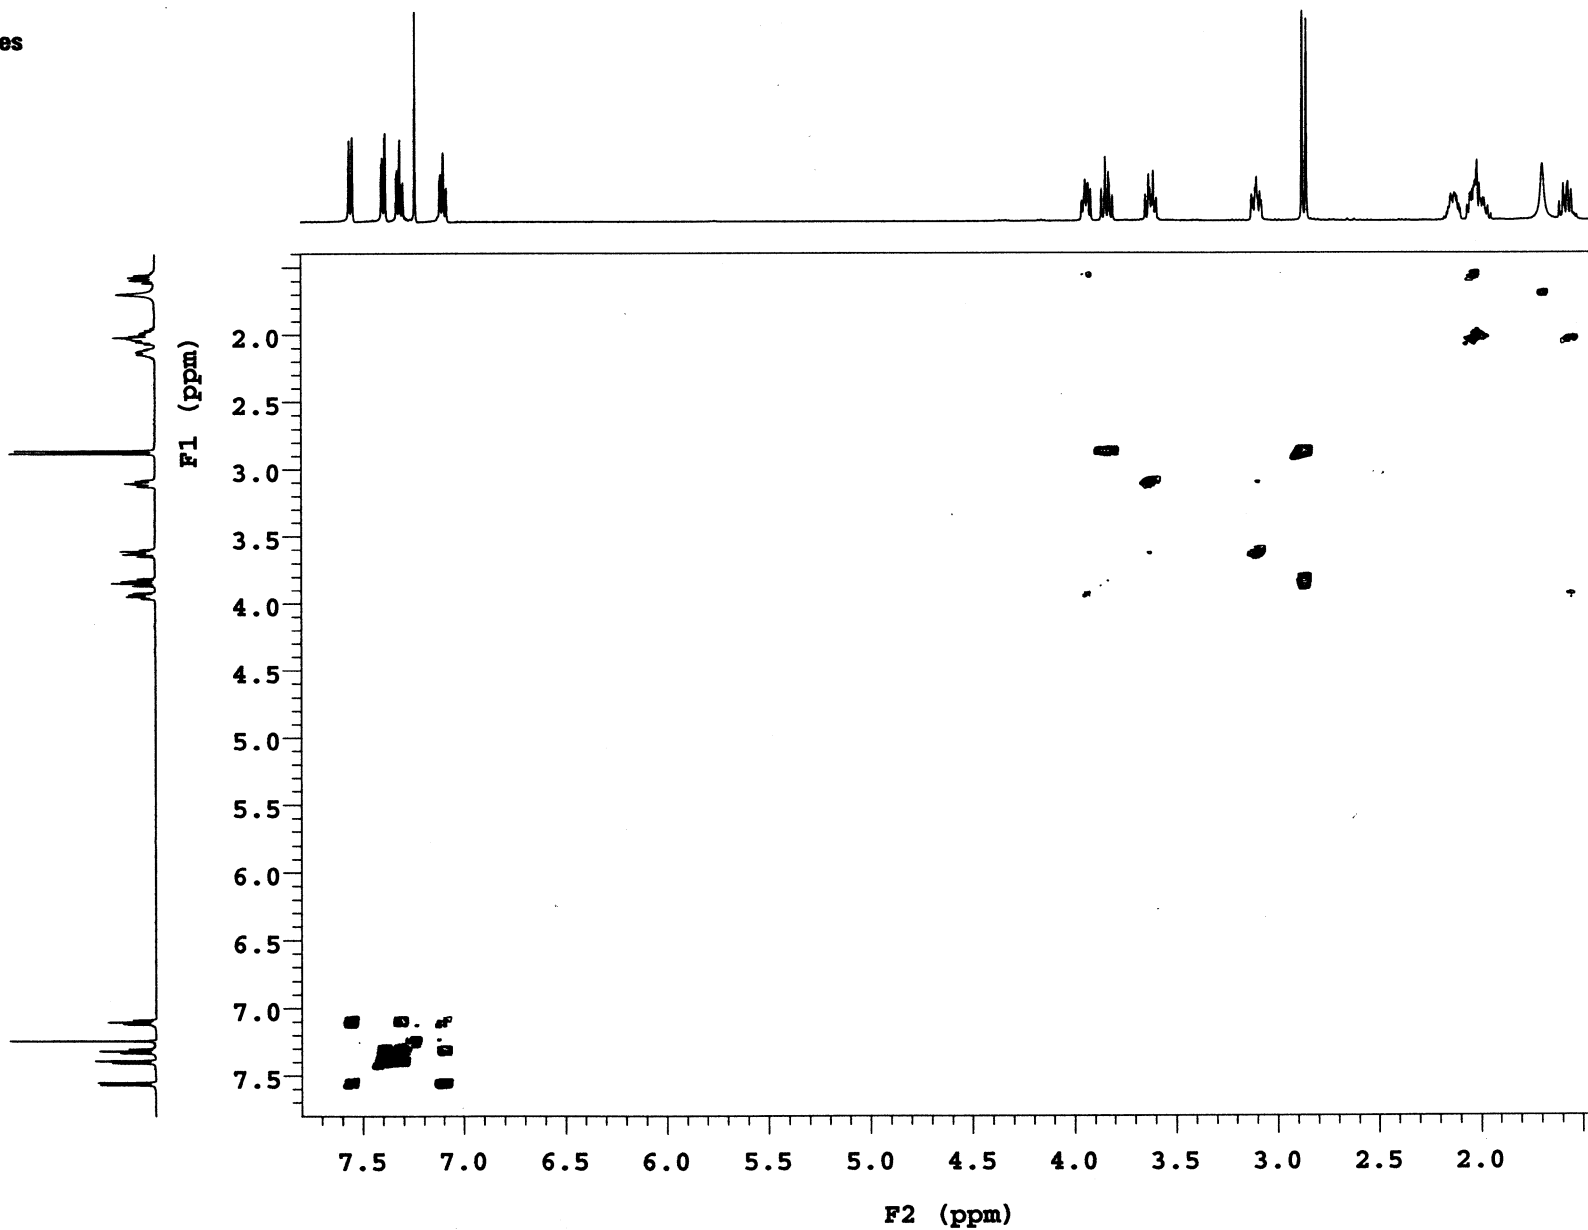

Fig S159. COSY of compound syn-4f

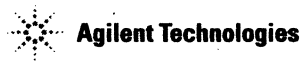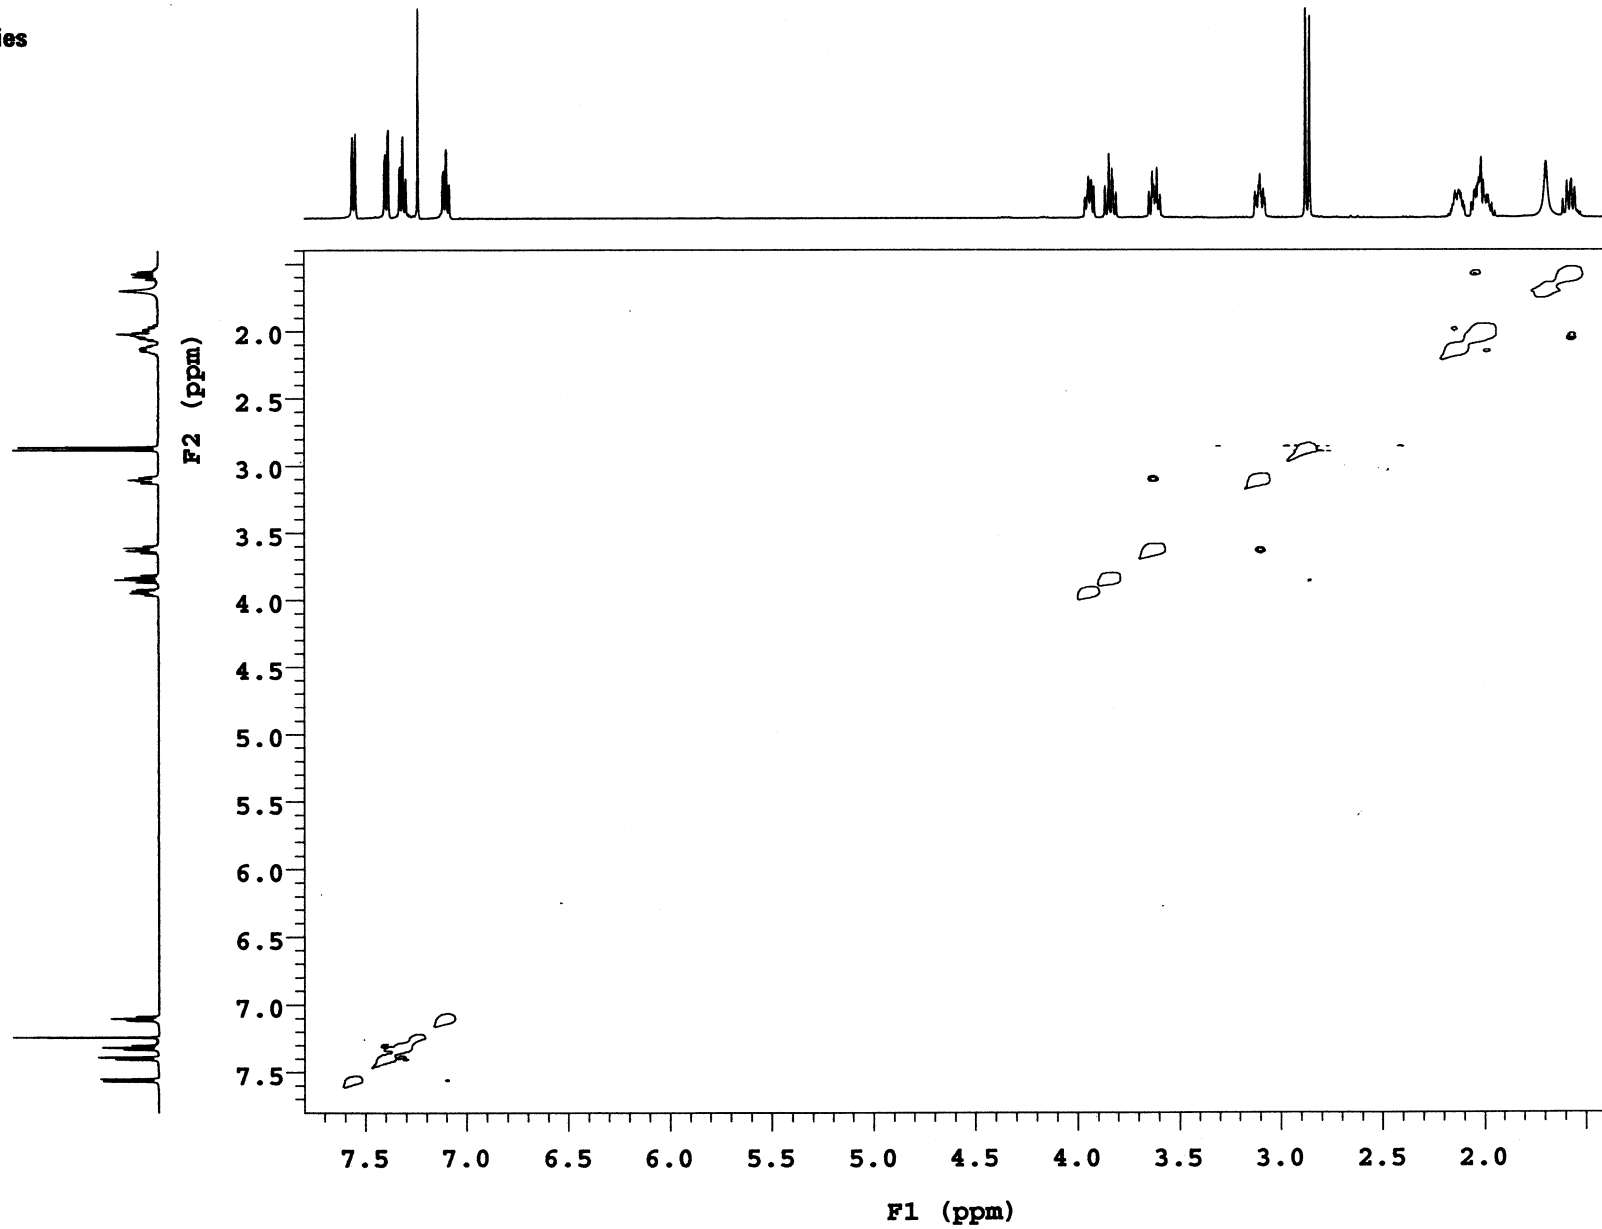

LCH-02-378

exp146 s2pu1

SAMPLE  
 date Feb 12 2015  
 solvent cdcl3  
 file exp

ACQUISITION  
 sfrq 499.833  
 tn H1  
 at 3.000  
 np 48000  
 sw 8000.0  
 fb not used  
 bs 4  
 tpwr 62  
 pw 4.8  
 d1 1.000  
 tof 499.7  
 nt 4  
 ct 4  
 alock y  
 gain not used

FLAGS  
 il n  
 in n  
 dp y  
 hs nn

DISPLAY  
 sp -0.1  
 wp 4998.3  
 vs 267  
 sc 0  
 wc 210  
 hzmm 23.80  
 is 33.57  
 rfl 4636.0  
 rfp 3618.8  
 th 8  
 ins 100.000  
 nm cdc ph

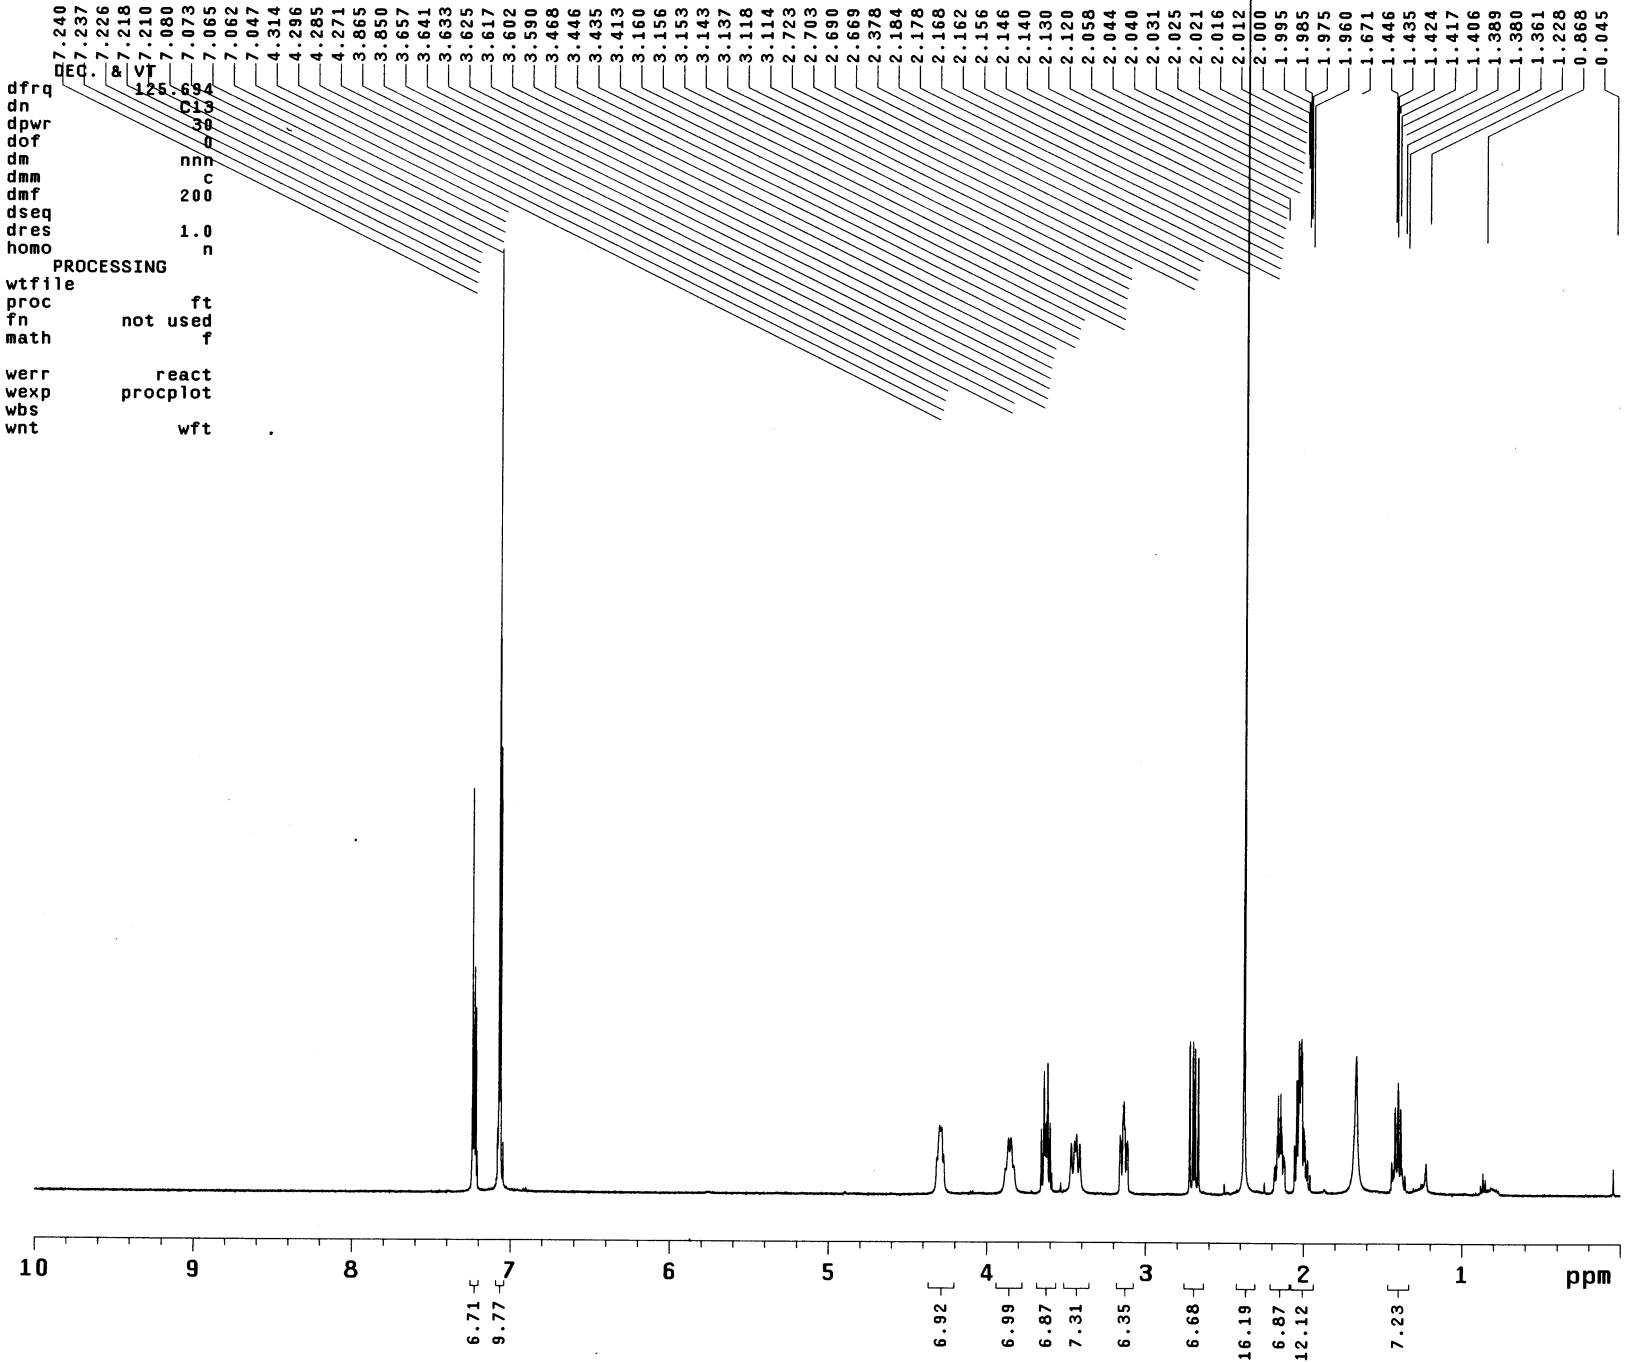Fig S161. <sup>1</sup>H NMR (CDCl<sub>3</sub>, 500 MHz) of compound syn-4g

LCH-02-378

exp147 s2pu1

| SAMPLE      |             | DEC. & VT  |          |
|-------------|-------------|------------|----------|
| date        | Feb 12 2015 | dfrq       | 499.833  |
| solvent     | cdc13       | dn         | H1       |
| file        | exp         | dpwr       | 44       |
| ACQUISITION |             |            |          |
| sfrq        | 125.696     | dm         | yvy      |
| tn          | C13         | dmm        | w        |
| at          | 1.000       | dmf        | 8868     |
| np          | 60332       | dseq       |          |
| sw          | 30165.9     | dres       | 1.0      |
| fb          | not used    | homo       | n        |
| bs          | 4           | PROCESSING |          |
| tpwr        | 59          | lb         | 1.00     |
| pw          | 4.8         | wtfile     |          |
| di          | 1.000       | proc       | ft       |
| tof         | 1883.7      | fn         | 131072   |
| nt          | 4000        | math       | f        |
| ct          | 4000        |            |          |
| alock       | y           | werr       | react    |
| gain        | not used    | wexp       | procplot |
| FLAGS       |             | wbs        | testsn   |
| il          | n           | wnt        | wft      |
| in          | n           |            |          |
| dp          | y           |            |          |
| hs          | nn          |            |          |
| DISPLAY     |             |            |          |
| sp          | -0.2        |            |          |
| wp          | 27649.9     |            |          |
| vs          | 293         |            |          |
| sc          | 0           |            |          |
| wc          | 210         |            |          |
| hzmm        | 131.67      |            |          |
| is          | 33.57       |            |          |
| rfl         | 10969.3     |            |          |
| rfp         | 9677.5      |            |          |
| th          | 7           |            |          |
| ins         | 100.000     |            |          |
| nm          | cdc ph      |            |          |

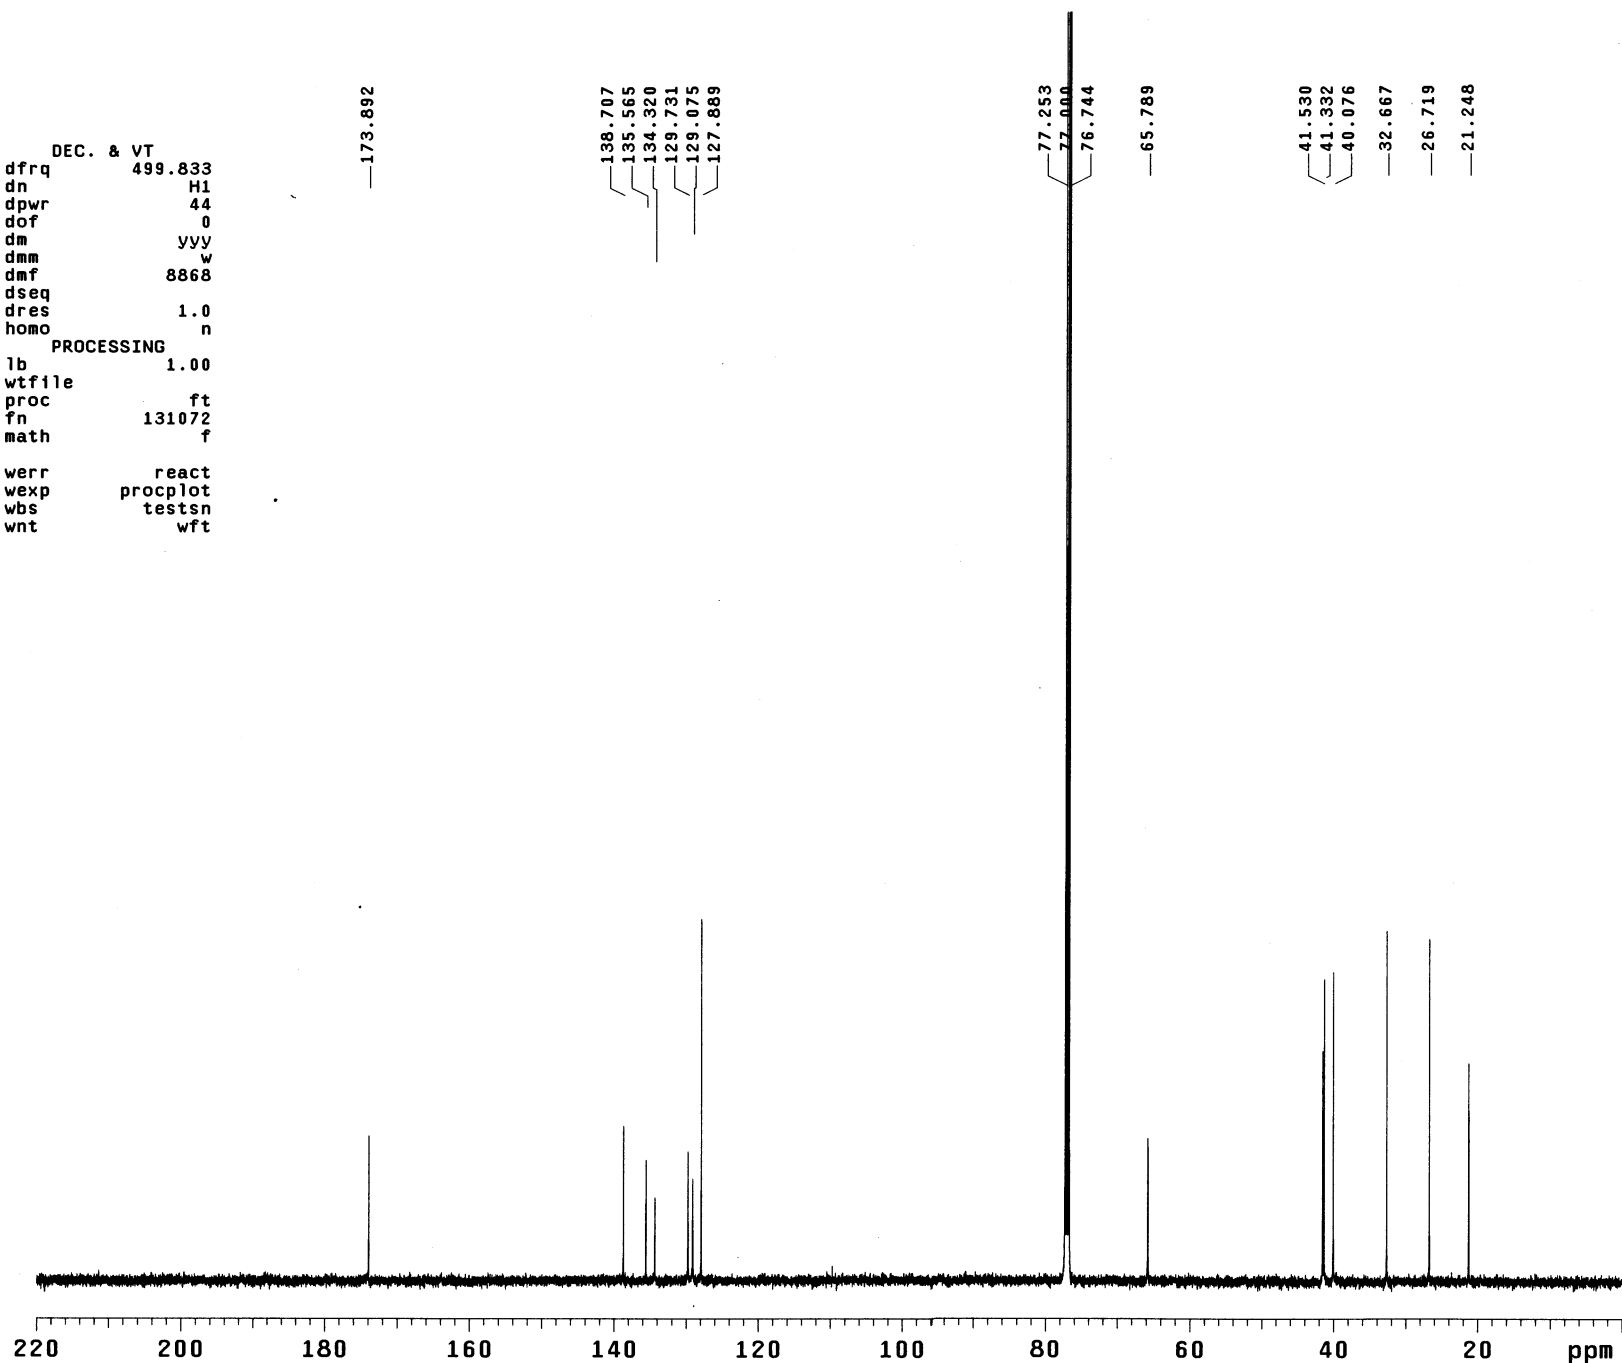Fig S162.  $^{13}\text{C}$  NMR ( $\text{CDCl}_3$ , 125 MHz) of compound syn-4g

LCH-02-378

exp148 DEPT

| SAMPLE      |             | DEPT          | ACQUISITION ARRAYS |      |
|-------------|-------------|---------------|--------------------|------|
| date        | Feb 12 2015 | j1xh 140.0    | array mult         |      |
| solvent     | cdc13       | mult arrayed  | arraydim           | 3    |
| sample      | undefined   | SPECIAL       |                    |      |
| ACQUISITION |             | temp not used | 1                  | mult |
| sw          | 30165.9     | gain 34       | 1                  | 0.5  |
| at          | 1.000       | spin 0        | 2                  | 1    |
| np          | 60332       | PROCESSING    | 3                  | 1.5  |
| bs          | 4           | lb 1.00       |                    |      |
| ss          | -4          | fn 131072     |                    |      |
| d1          | 1.000       | SPECTRUM      |                    |      |
| nt          | 2000        | wp 27649.9    |                    |      |
| ct          | 2000        | sp -0.2       |                    |      |
| TRANSMITTER |             | rp -154.0     |                    |      |
| tn          | C13         | lp 223.4      |                    |      |
| tof         | 1883.7      | ai cdc ph     |                    |      |
| tpwr        | 59          | REFERENCE     |                    |      |
| pw          | 14.700      | rfl 1291.8    |                    |      |
| DECOUPLER   |             | rfp 0         |                    |      |
| dn          | H1          | PLOT          |                    |      |
| dof         | 0           | wc 210        |                    |      |
| dpwr        | 44          | sc 0          |                    |      |
| dm          | nny         | vs 21000      |                    |      |
| dmm         | ccw         | hzmm 131.67   |                    |      |
| dmf         | 8868        | th 7          |                    |      |
| pp1v1       | 59          |               |                    |      |
| pp          | 21.200      |               |                    |      |

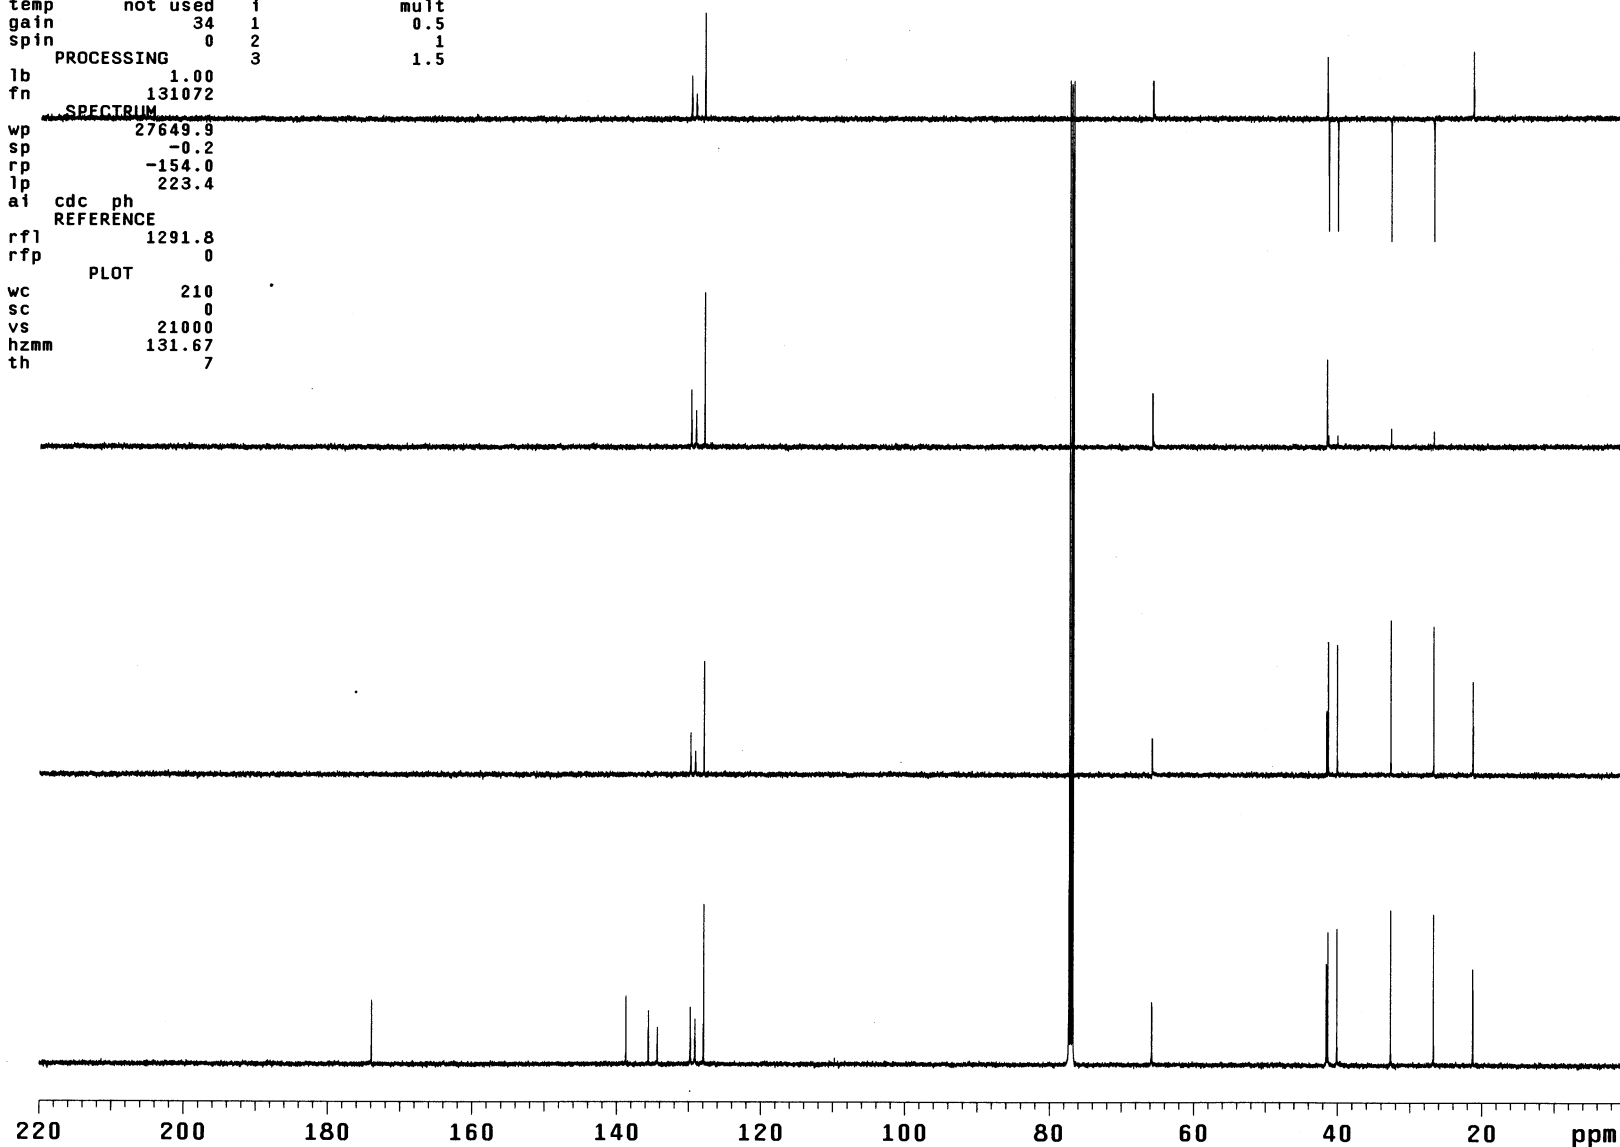

Fig S163. DEPT of compound syn-4g

Fig S164. HSQC of compound syn-4g

LCH-02-378

exp151 gHSQC

| SAMPLE           | FLAGS         | ACQUISITION | ARRAYS       |
|------------------|---------------|-------------|--------------|
| date Feb 12 2015 | hs            | n           | array phase  |
| solvent cdcl3    | sspul         | y           | arraydim 256 |
| sample undefined | PFGflg        | y           |              |
| ACQUISITION      | hsglv1        | 1004        | phase        |
| sw 4001.6        | SPECIAL       | 1           | 1            |
| at 0.128         | temp          | not used    | 2            |
| np 1024          | gain          | 54          |              |
| fb not used      | spin          | 0           |              |
| ss 32            | GRADIENTS     |             |              |
| d1 1.000         | gzlv11        | 1004        |              |
| nt 8             | gt1           | 0.002000    |              |
| 2D ACQUISITION   | gzlv13        | 505         |              |
| sw1 21367.5      | gt3           | 0.001000    |              |
| ni 128           | gstab         | 0.000500    |              |
| phase arrayed    | F2 PROCESSING |             |              |
| TRANSMITTER      | gf            | 0.059       |              |
| tn H1            | gfs           | not used    |              |
| sfrq 499.832     | fn            | 1024        |              |
| tof -499.9       | F1 PROCESSING |             |              |
| tpwr 62          | gf1           | 0.006       |              |
| pw 13.800        | gfs1          | not used    |              |
| DECOUPLER        | procl         | lp          |              |
| dn C13           | fn1           | 2048        |              |
| dof -2515.1      | DISPLAY       |             |              |
| dm nny           | sp            | 641.8       |              |
| dmm ccp          | wp            | 3095.0      |              |
| dmf 32258        | sp1           | 2355.7      |              |
| dpwr 43          | wp1           | 14252.0     |              |
| pwxlvl 61        | rfl           | 1203.3      |              |
| pxw 11.000       | rfl1          | 1188.6      |              |
| HSQC             | rfl1          | 3966.5      |              |
| j1xh 140.0       | rfl1          | 2670.5      |              |
| nullflg y        | PLOT          |             |              |
| mult 2           | wc            | 150.0       |              |
|                  | sc            | 6.2         |              |
|                  | wc2           | 116.2       |              |
|                  | sc2           | 0           |              |
|                  | vs            | 502         |              |
|                  | th            | 6           |              |
|                  | ai            | cdc         | ph           |

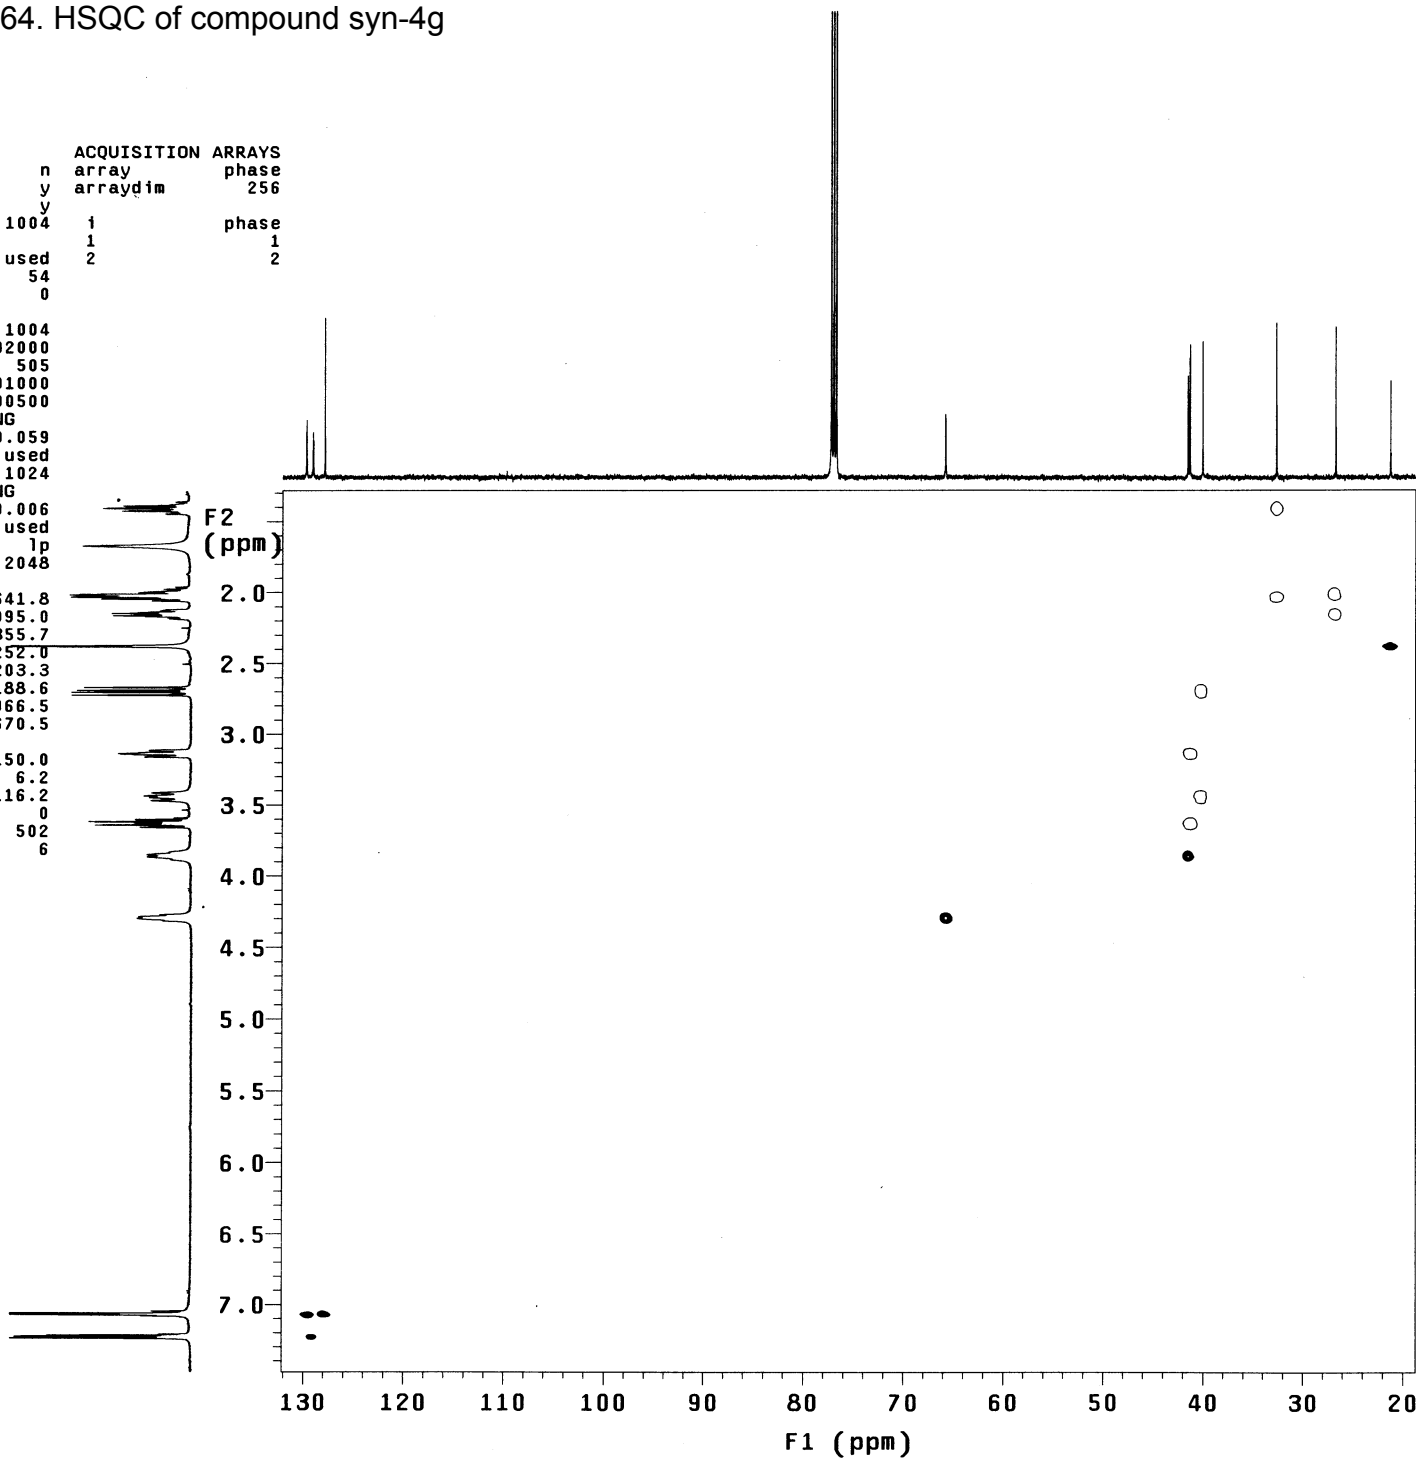



LCH-02-378

exp149 gCOSY

| SAMPLE         |             | FLAGS         |          |
|----------------|-------------|---------------|----------|
| date           | Feb 12 2015 | hs            | nn       |
| solvent        | cdc13       | sspul         | n        |
| sample         | undefined   | hsglv1        | 1004     |
| ACQUISITION    |             | SPECIAL       |          |
| sw             | 4001.6      | temp          | not used |
| at             | 0.128       | gain          | 34       |
| np             | 1024        | spin          | 0        |
| fb             | not used    | F2 PROCESSING |          |
| ss             | 16          | sb            | -0.064   |
| d1             | 1.000       | sbs           | not used |
| nt             | 8           | fn            | 1024     |
| 2D ACQUISITION |             | F1 PROCESSING |          |
| sw1            | 4001.6      | sb1           | -0.032   |
| n1             | 128         | sbs1          | not used |
| TRANSMITTER    |             | DISPLAY       |          |
| tn             | H1          | fn1           | 1024     |
| sfrq           | 499.832     | sp            | 322.3    |
| tof            | -499.9      | wp            | 3431.1   |
| tpwr           | 62          | sp1           | 328.2    |
| pw             | 13.800      | wp1           | 3423.2   |
| GRADIENTS      |             | rfl           | 1202.4   |
| gzlv11         | 1004        | rfl1          | 1188.6   |
| gt1            | 0.001000    | rfl1          | 1204.3   |
| gstab          | 0.000500    | rfl1          | 1188.6   |
| DECOUPLER      |             | PLOT          |          |
| dn             | C13         | wc            | 155.0    |
| dm             | nnn         | sc            | 10.0     |
|                |             | wc2           | 155.0    |
|                |             | sc2           | 0        |
|                |             | vs            | 502      |
|                |             | th            | 6        |
|                |             | ai            | cdc av   |

F2  
(ppm)

2

3

4

5

6

7

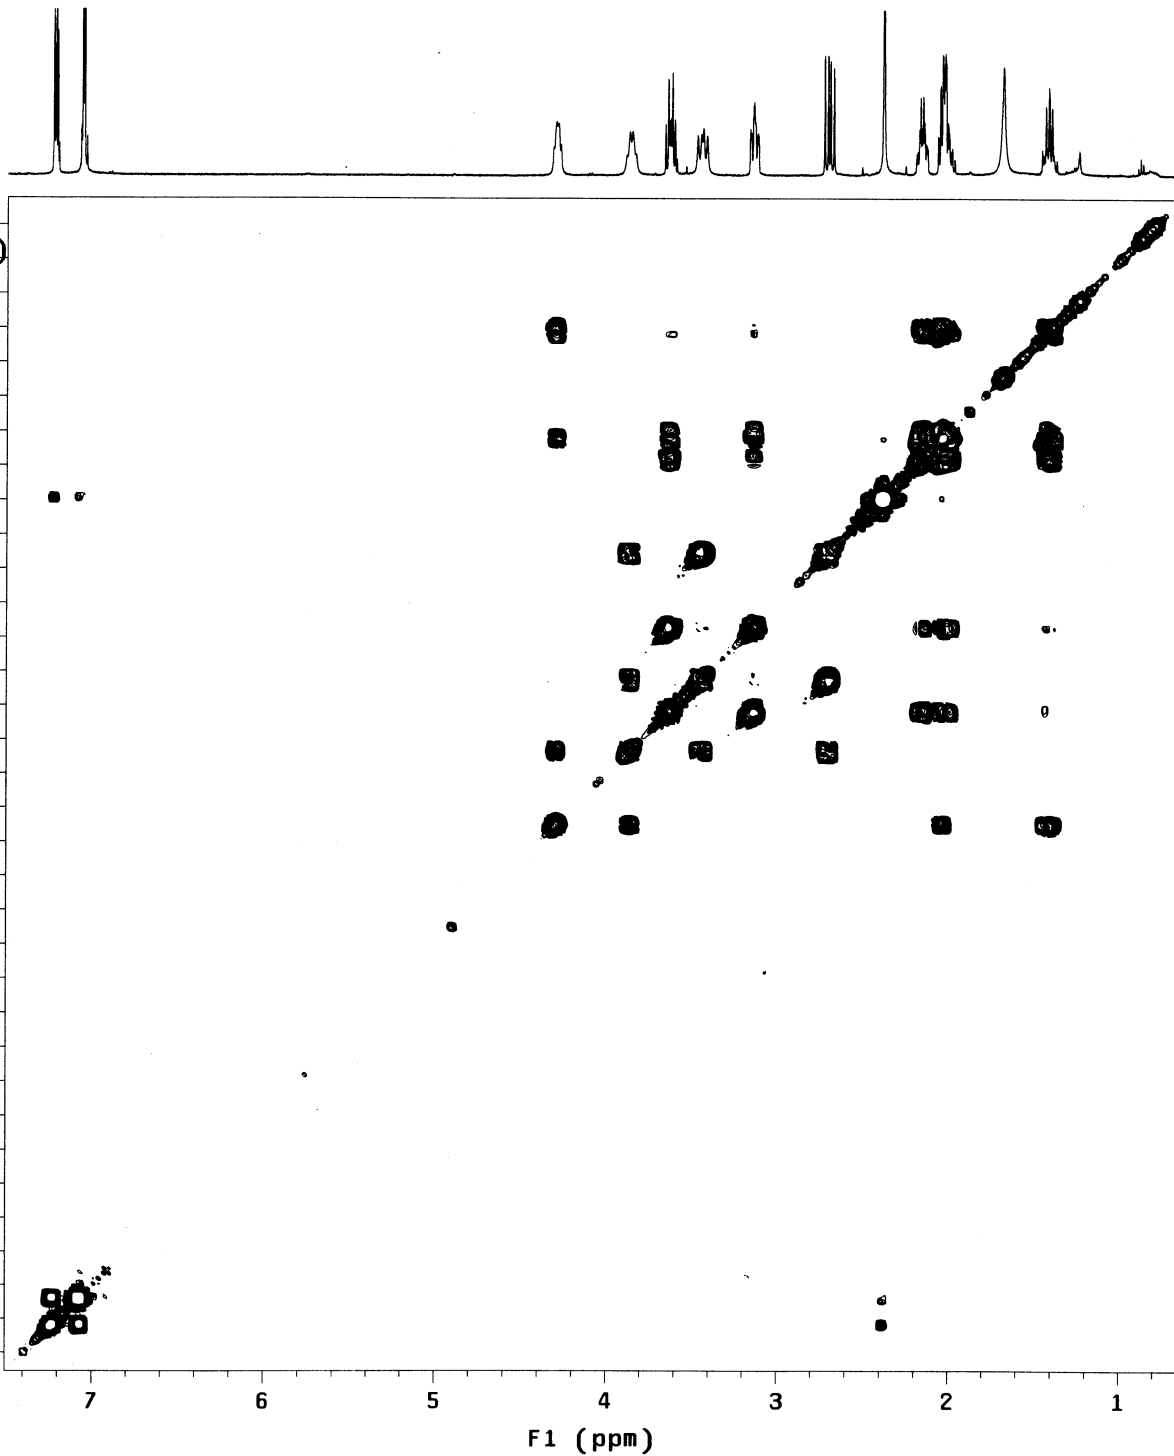

Fig S165. COSY of compound syn-4g

F1 (ppm)

LCH-02-378

exp150 NOESY

| SAMPLE         |             | FLAGS         |          |
|----------------|-------------|---------------|----------|
| date           | Feb 28 2015 | hs            | n        |
| solvent        | cdc13       | sspul         | y        |
| sample         | undefined   | PFGflg        | y        |
| ACQUISITION    |             | hsglvi        | 1004     |
| sw             | 4001.6      | SPECIAL       |          |
| at             | 0.128       | temp          | not used |
| np             | 1024        | gain          | 34       |
| fb             | not used    | spin          | 0        |
| ss             | 32          | F2 PROCESSING |          |
| d1             | 1.000       | gf            | 0.059    |
| nt             | 16          | gfs           | not used |
| 2D ACQUISITION |             | fn            | 1024     |
| sw1            | 4001.6      | F1 PROCESSING |          |
| ni             | 200         | gf1           | 0.046    |
| TRANSMITTER    |             | gfs1          | not used |
| tn             | H1          | proc1         | 1p       |
| sfrq           | 499.832     | fn1           | 1024     |
| tof            | -499.9      | DISPLAY       |          |
| tpwr           | 62          | sp            | 548.2    |
| pw             | 13.800      | wp            | 3149.7   |
| NOESY          |             | sp1           | 548.6    |
| mix            | 0.600       | wp1           | 3149.7   |
| PRESATURATION  |             | rfl           | 1203.2   |
| satmode        | nnnn        | rfp           | 1188.6   |
| satpwr         | 0           | rfl1          | 1202.8   |
| satdly         | 0           | rfp1          | 1188.6   |
| satfrq         | 0           | PLOT          |          |
| DECOUPLER      |             | wc            | 155.0    |
| dn             | C13         | sc            | 10.0     |
| dm             | nnn         | wc2           | 155.0    |
|                |             | sc2           | 0        |
|                |             | vs            | 1727     |
|                |             | th            | 1        |
|                |             | ai            | ph       |

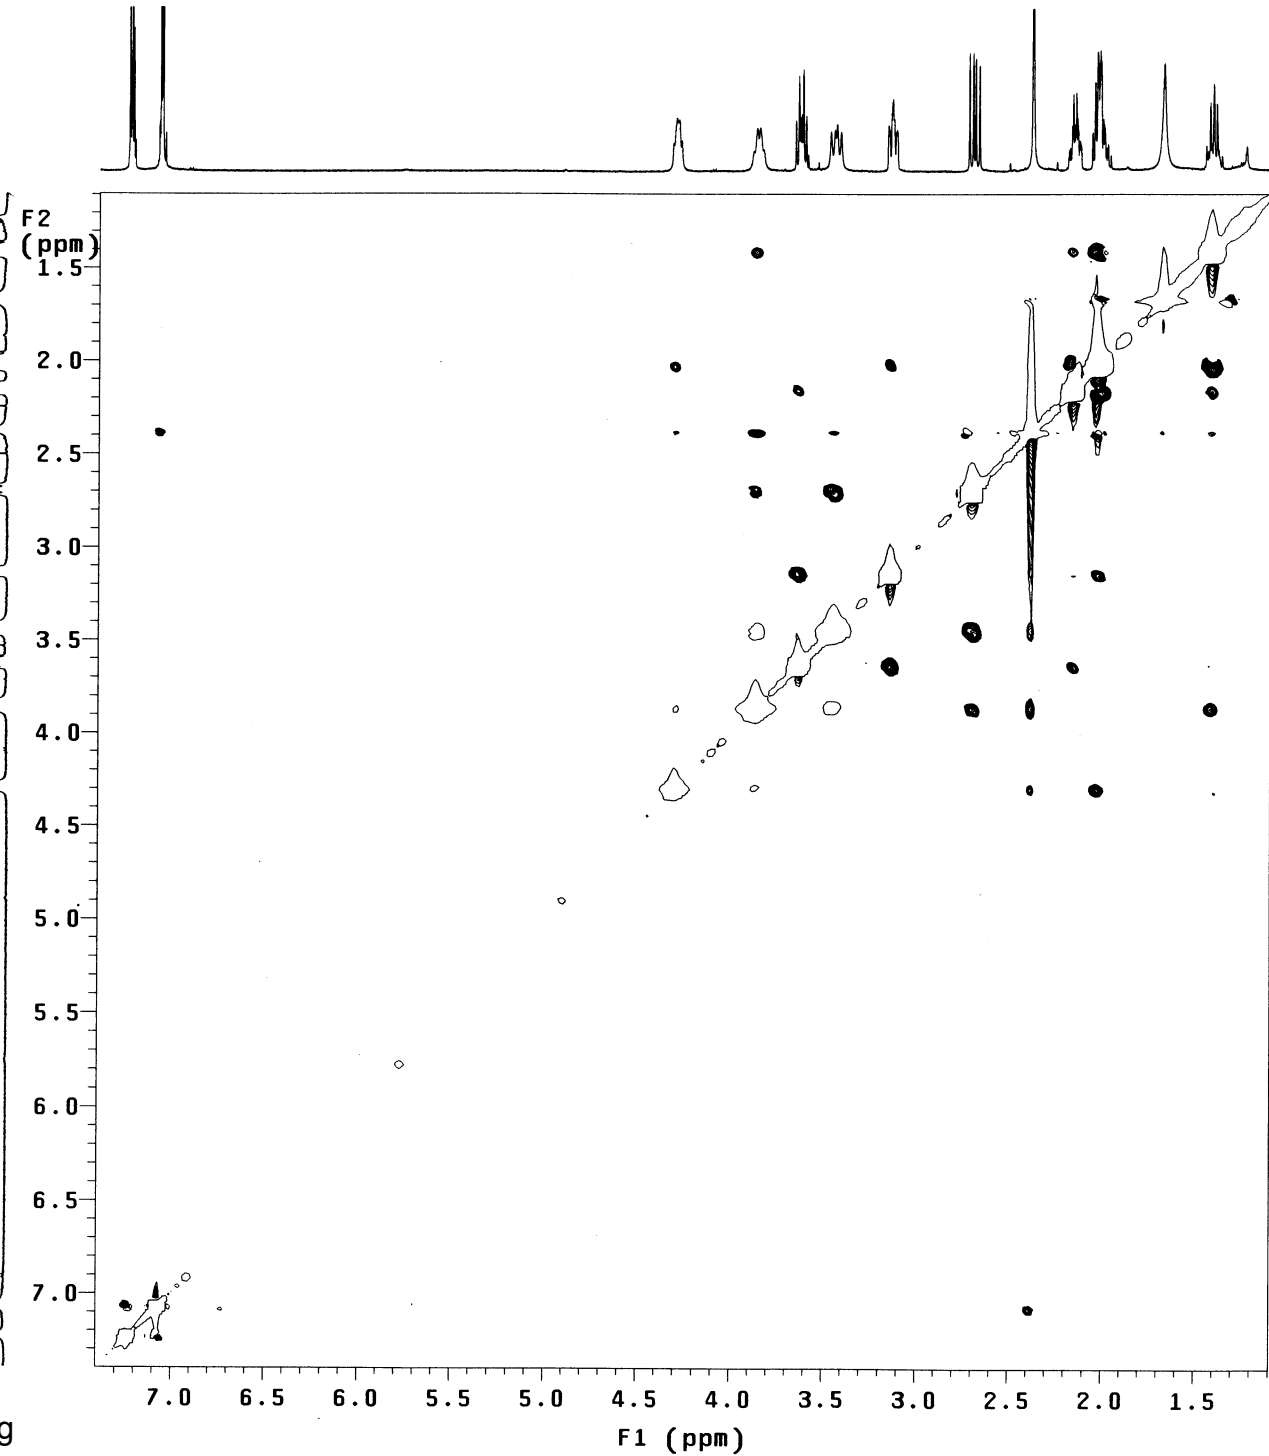

Fig S166. NOESY of compound syn-4g

LCH-02-396

Sample Name **LCH-02-396**  
Date collected **2015-06-09**Pulse sequence **PROTON**  
Solvent **cdcl3**Temperature **25**  
Spectrometer **Agilent-NMR-inova500**Study owner **vnmr2**  
Operator **vnmr2**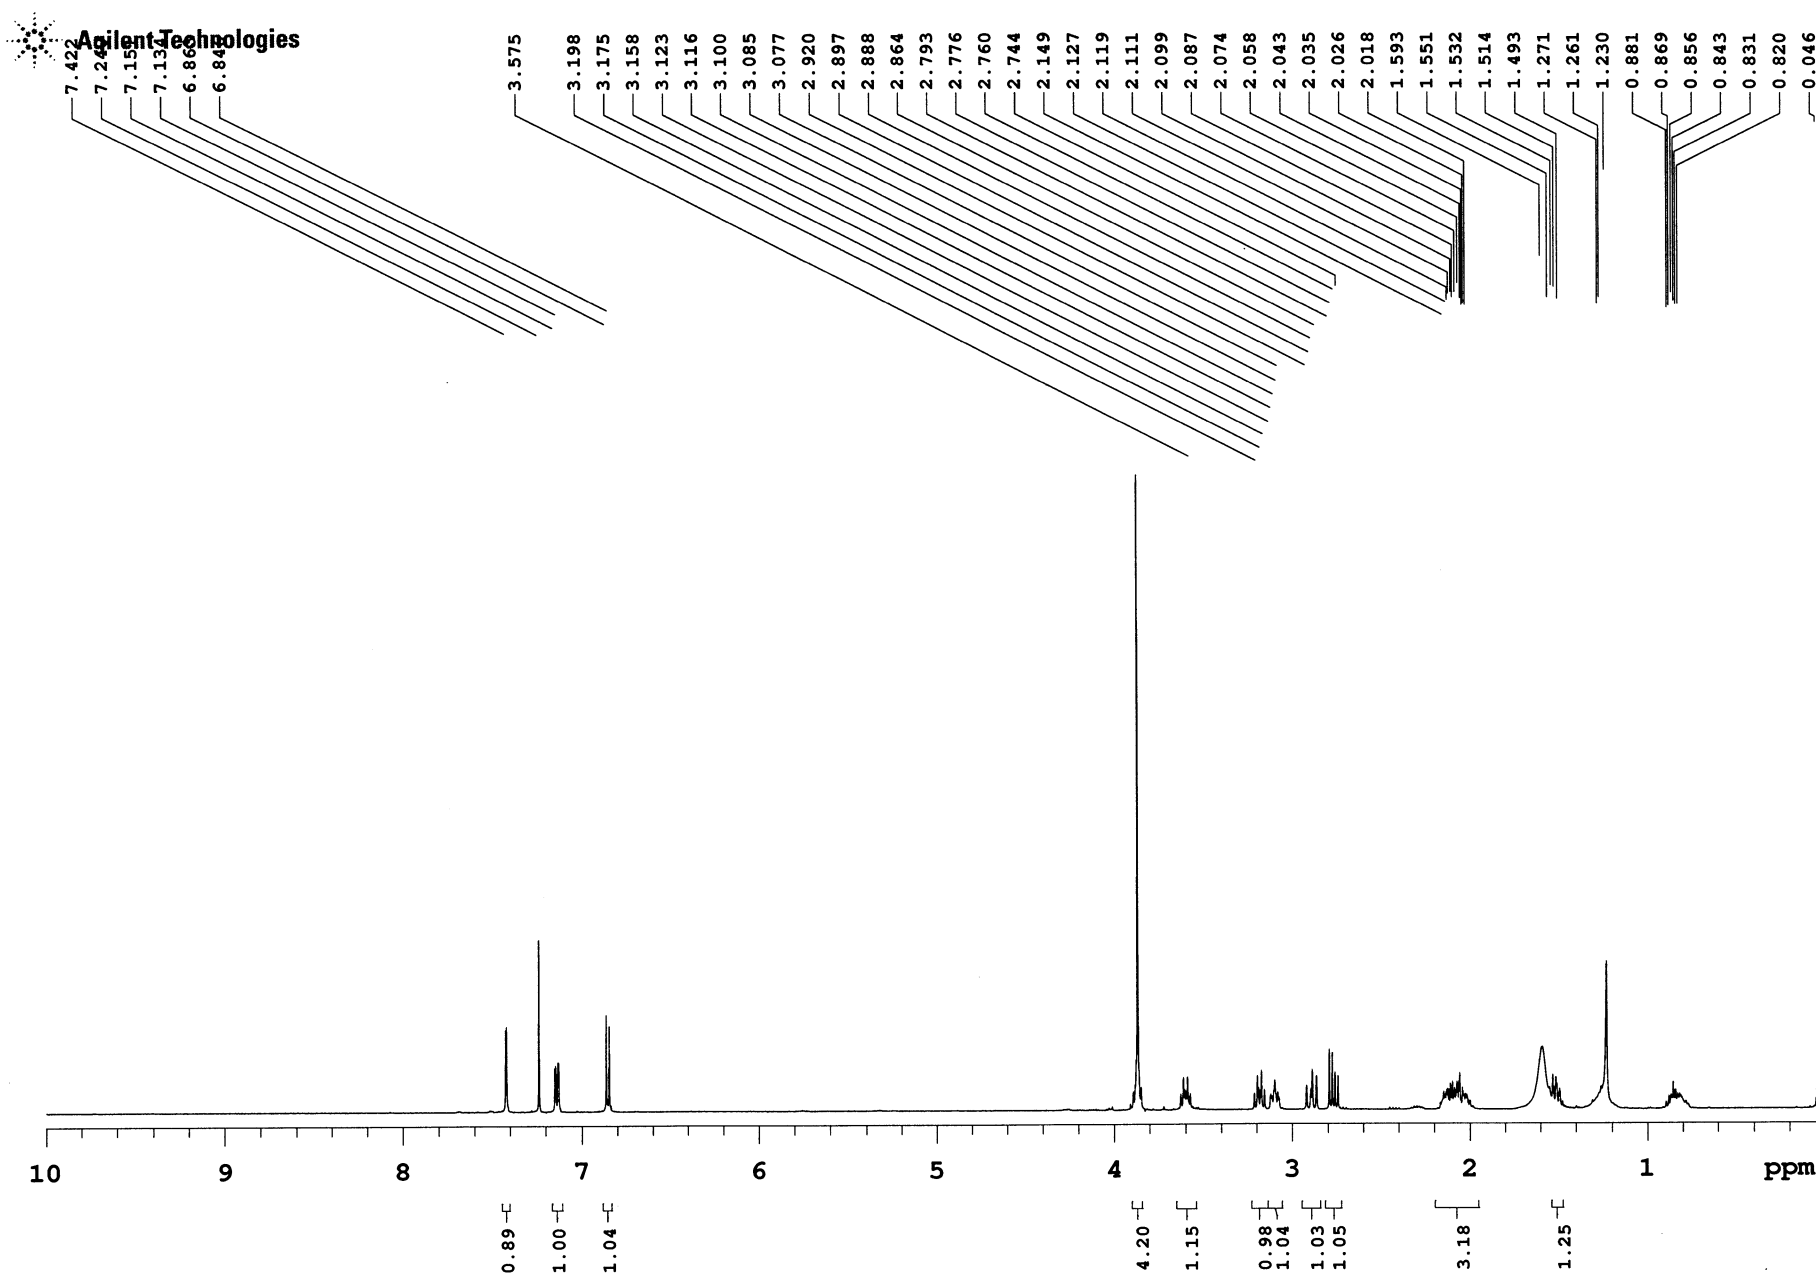

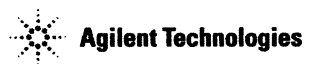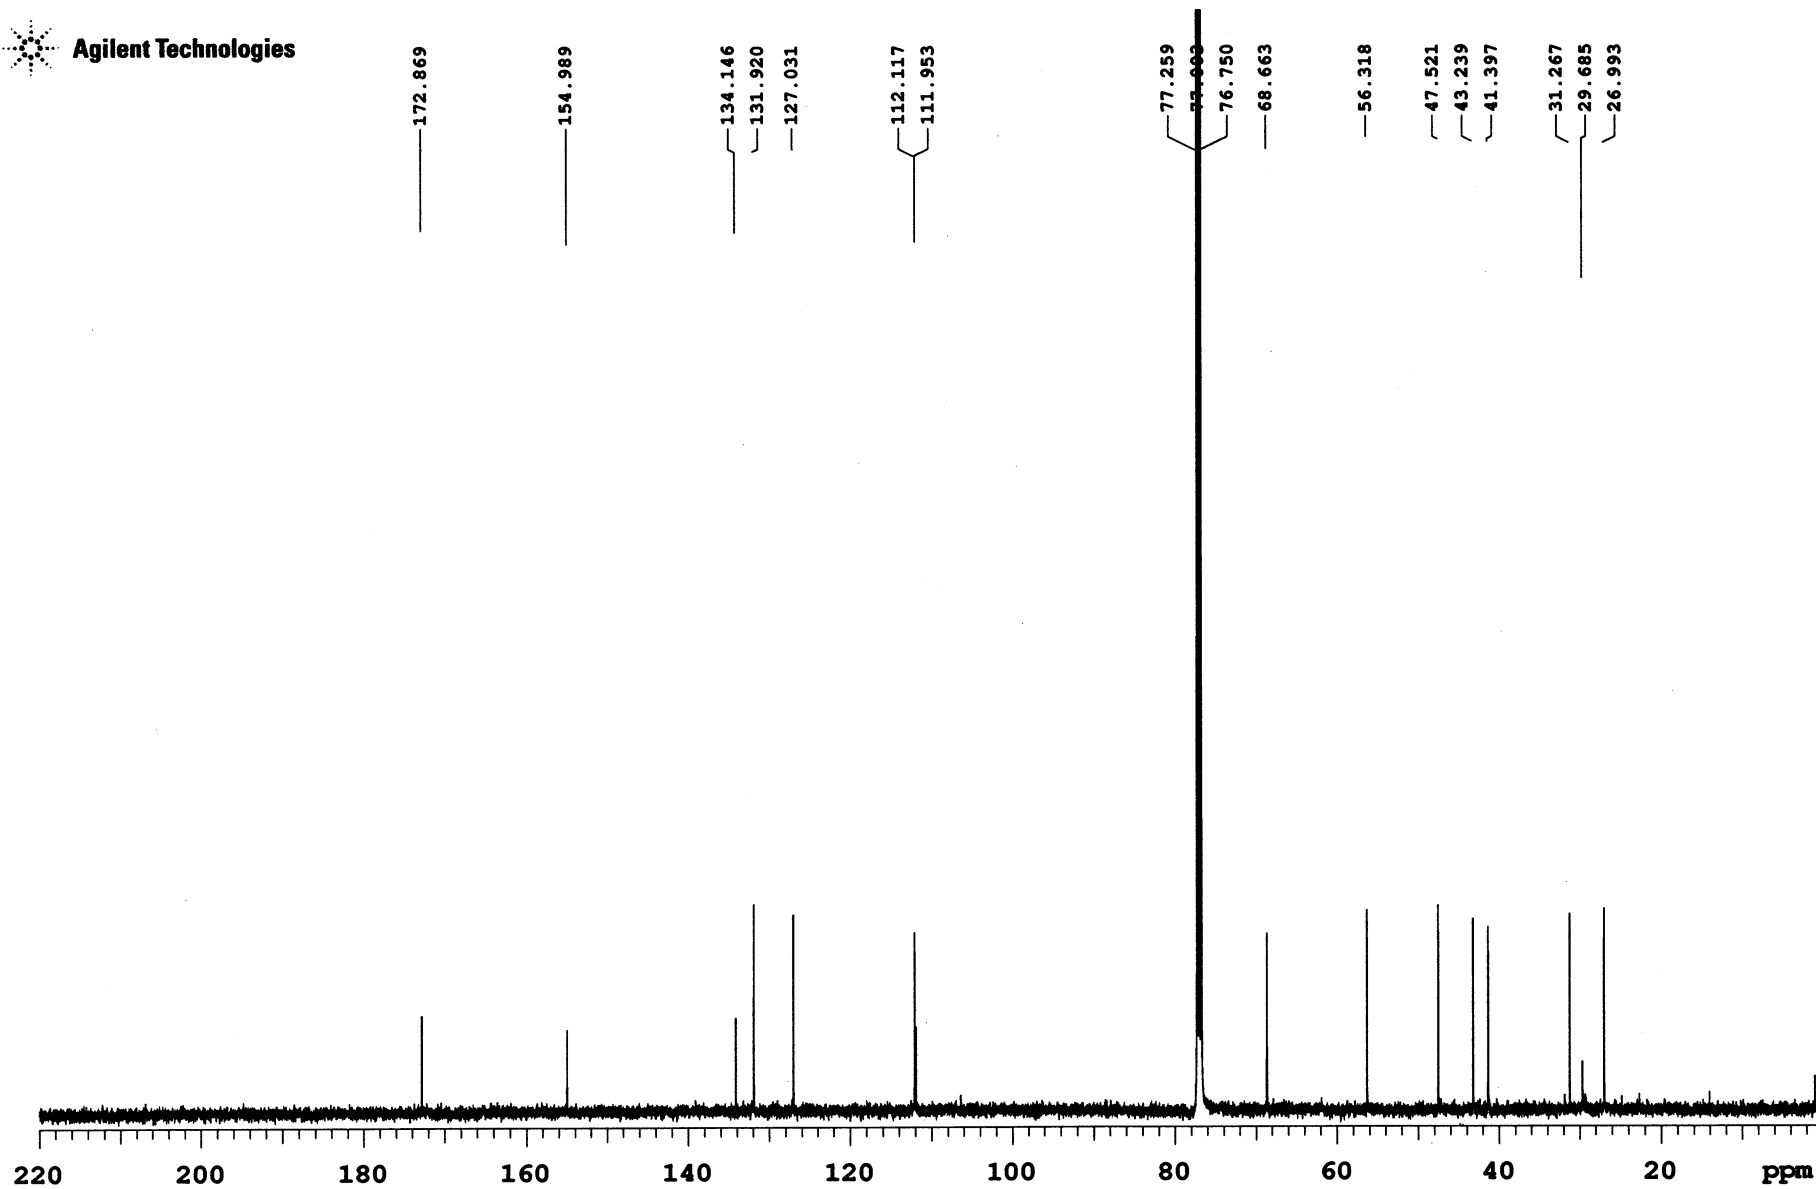Fig S168. <sup>13</sup>C NMR (CDCl<sub>3</sub>, 125 MHz) of compound syn-4h

Sample Name **LCH-02-396**  
Date collected **2015-04-12**Pulse sequence **DEPT**  
Solvent **cdcl3**Temperature **50**  
Spectrometer **--**Study owner **vnmr2**  
Operator **vnmr2**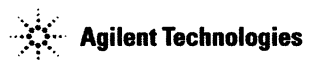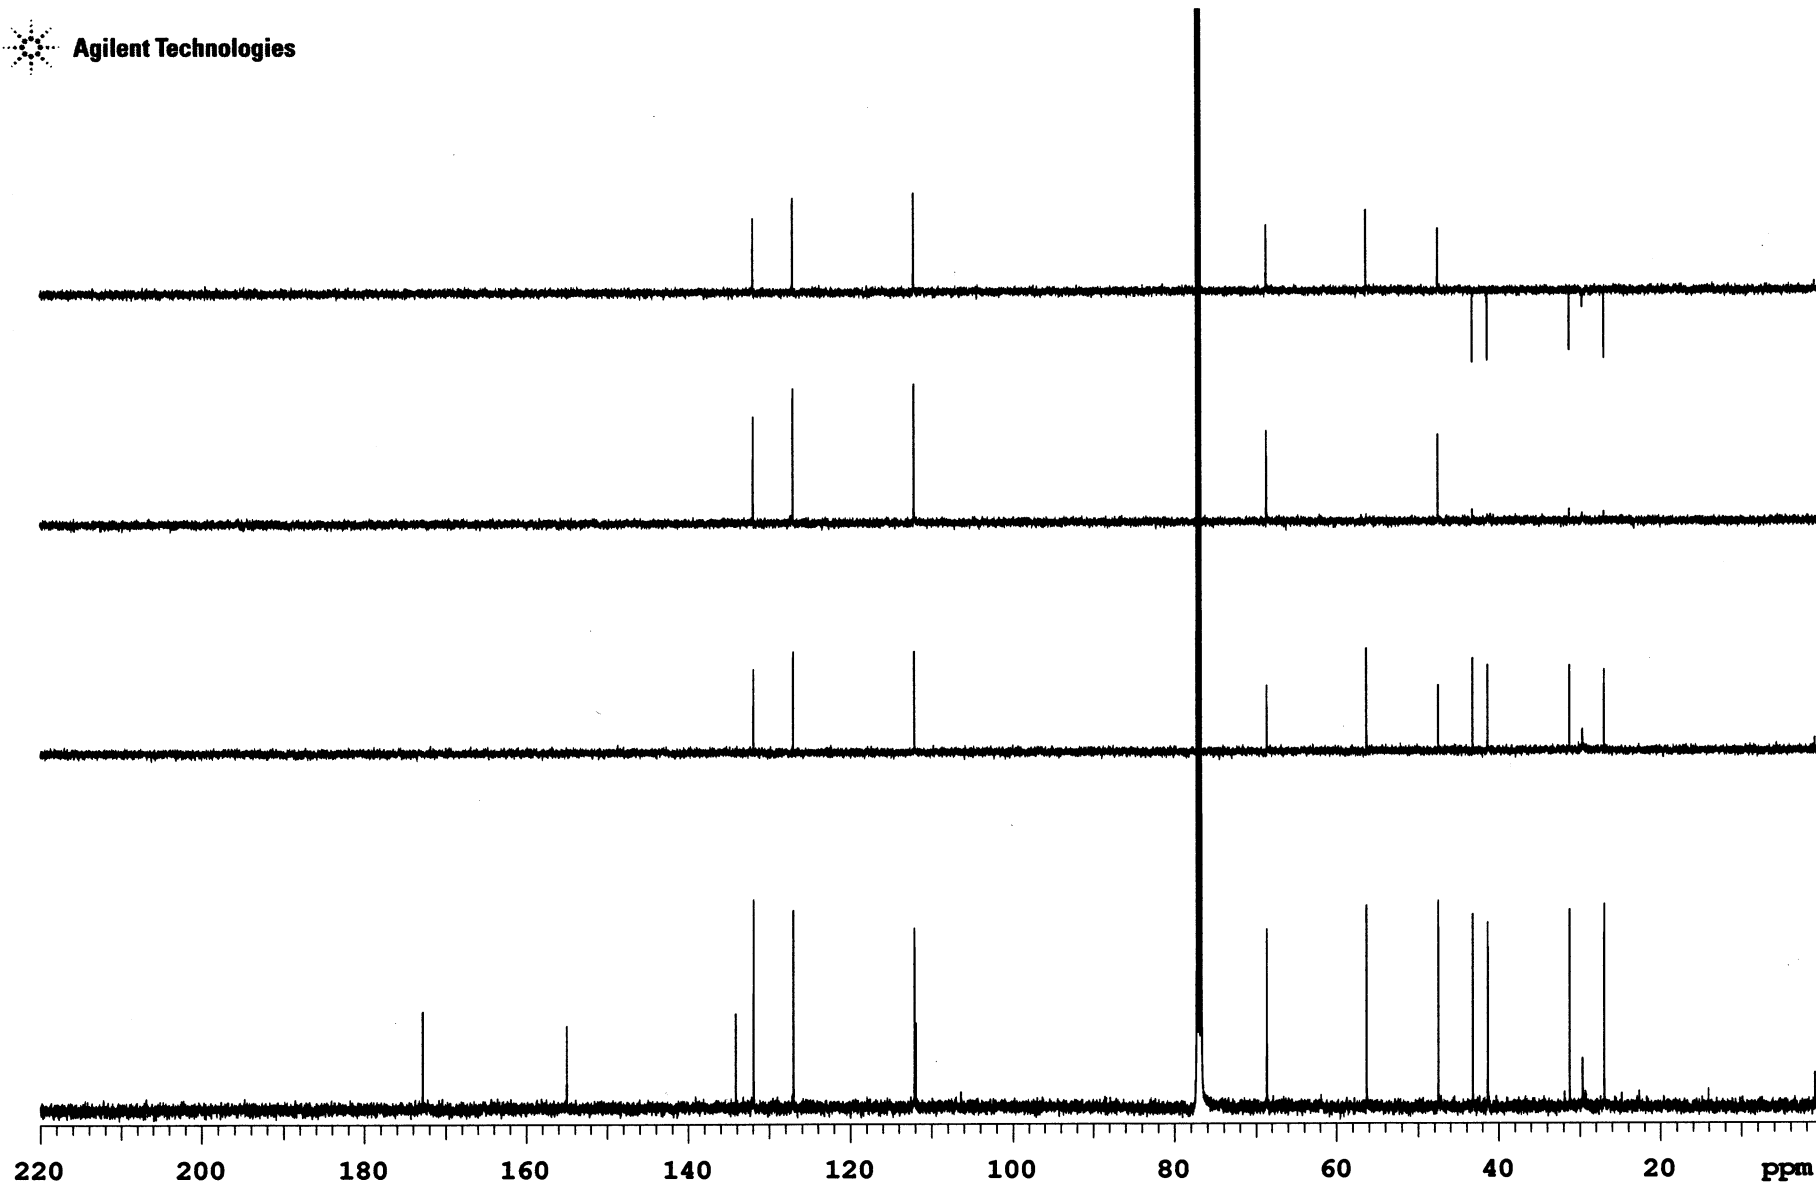

Fig S169. DEPT of compound syn-4h

LCH-02-396

Sample Name **LCH-02-396**  
Date collected **2015-06-09**Pulse sequence **gHSQC**  
Solvent **cdcl3**Temperature **25**  
Spectrometer **Agilent-NMR-inova500**Study owner **vnmr2**  
Operator **vnmr2**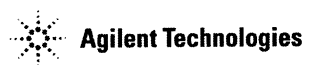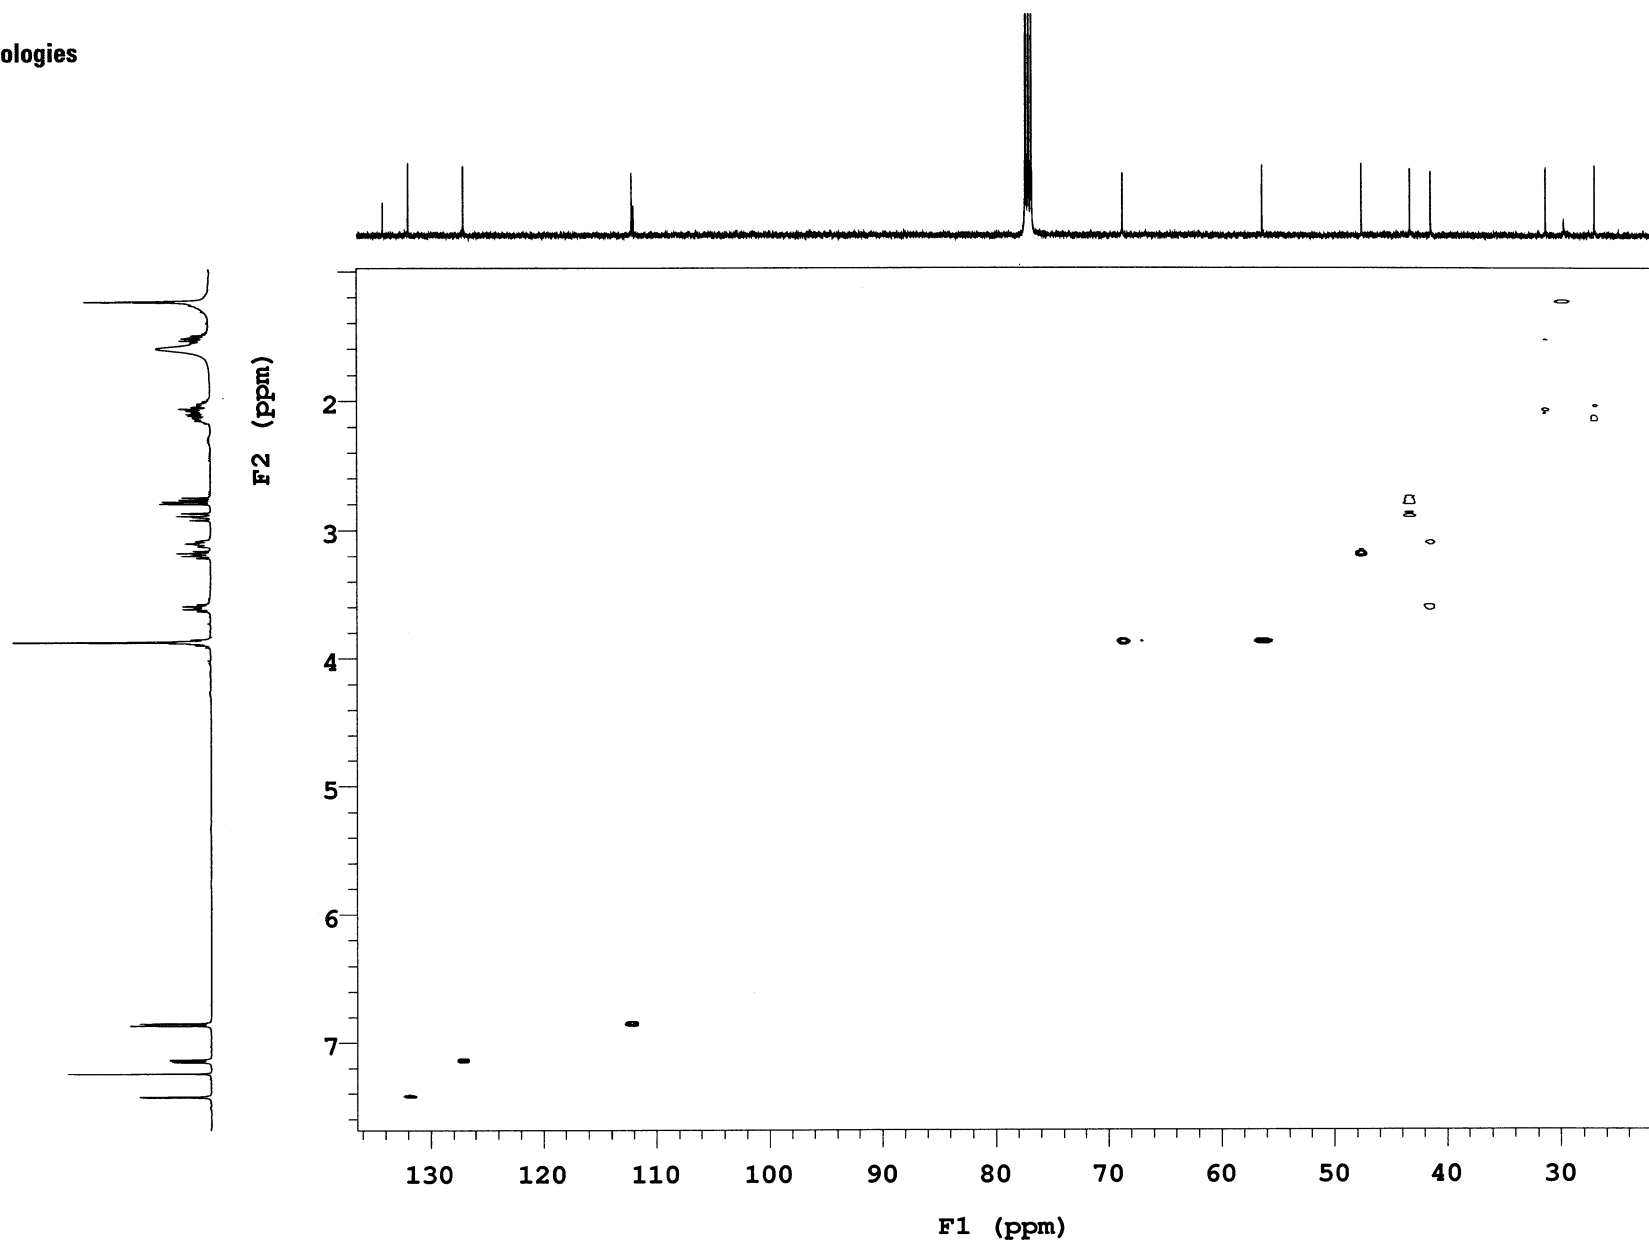

Fig S170. HSQC of compound syn-4h

LCH-02-396

Sample Name **LCH-02-396**  
Date collected **2015-04-13**Pulse sequence **gCOSY**  
Solvent **cdcl3**Temperature **50**  
Spectrometer **—**Study owner **vnmr2**  
Operator **vnmr2**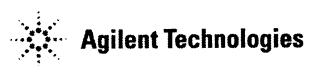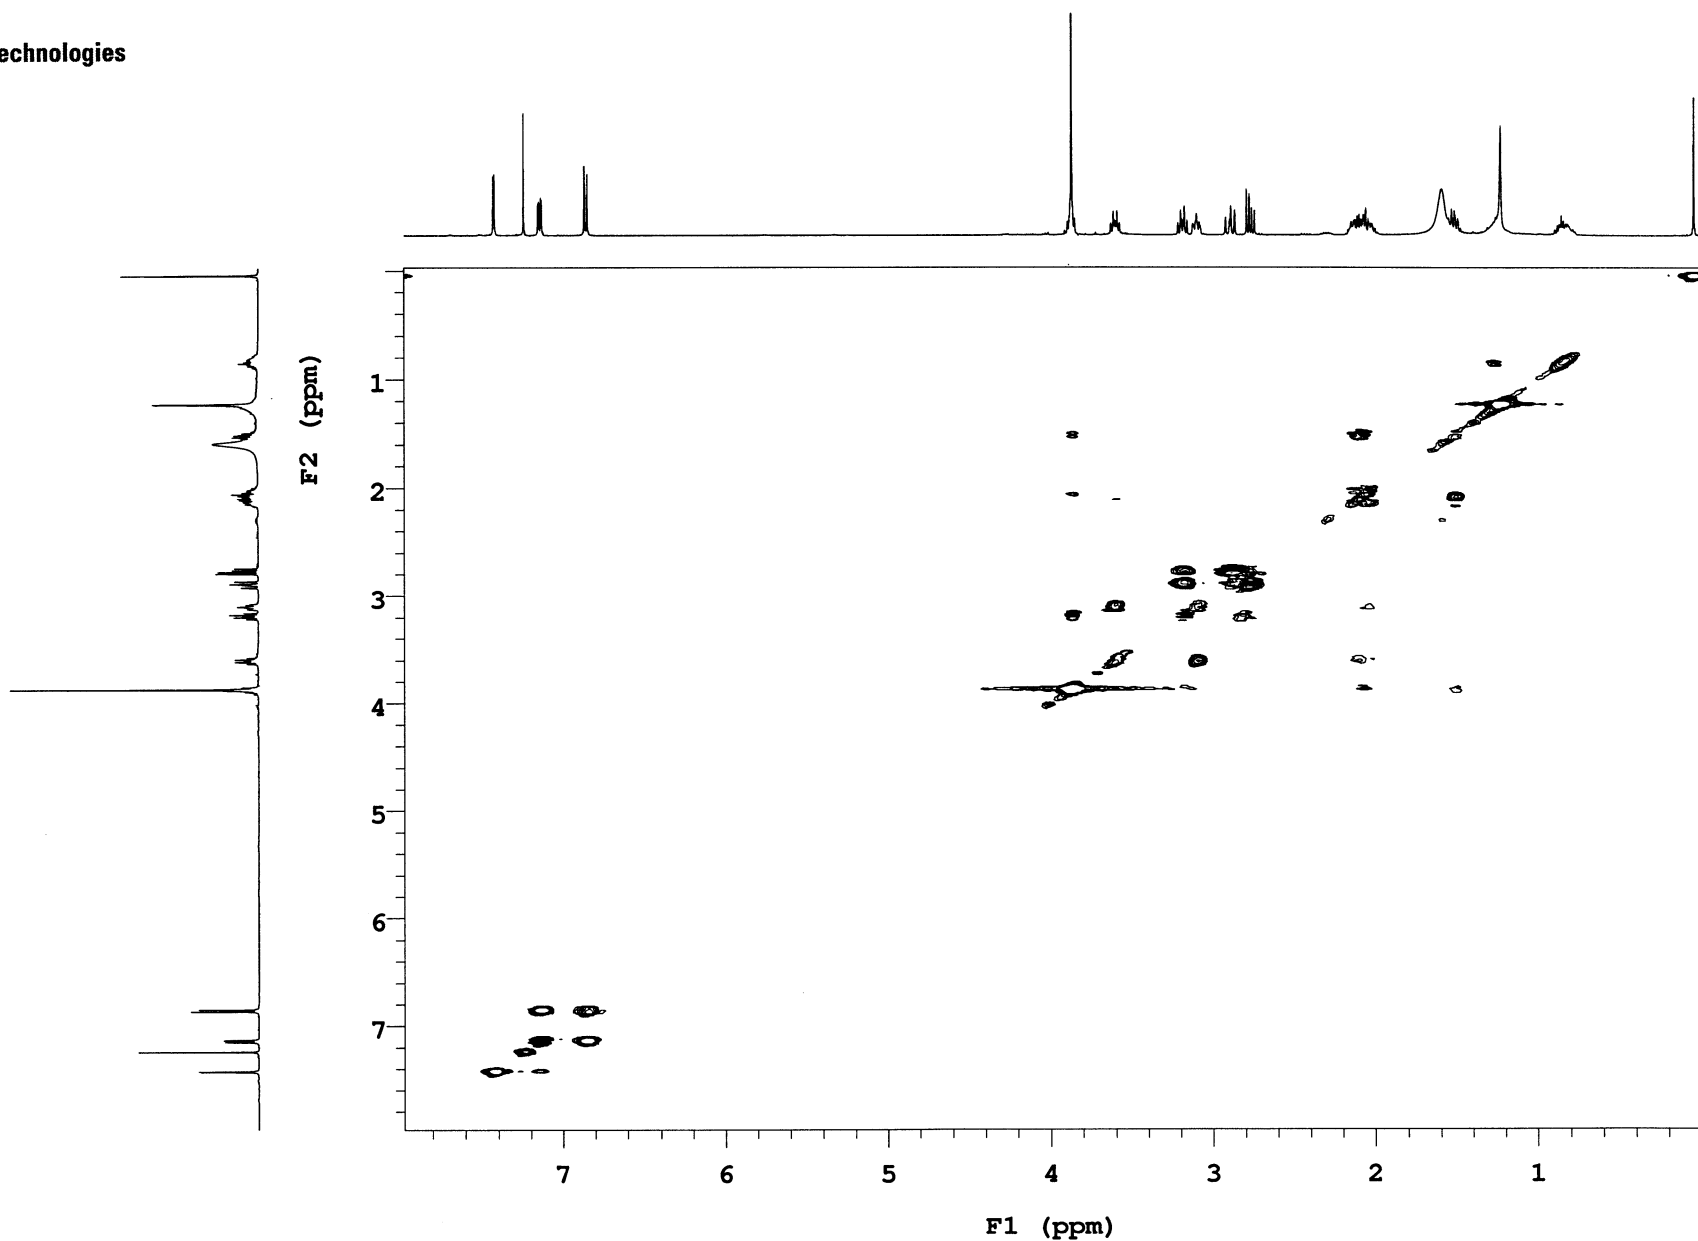

Fig S171. COSY of compound syn-4h

LCH-02-396

Sample Name **LCH-02-396**  
Date collected **2015-04-13**Pulse sequence **NOESY**  
Solvent **cdcl3**Temperature **50**  
Spectrometer **--**Study owner **vnmr2**  
Operator **vnmr2**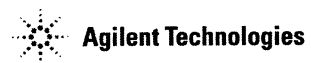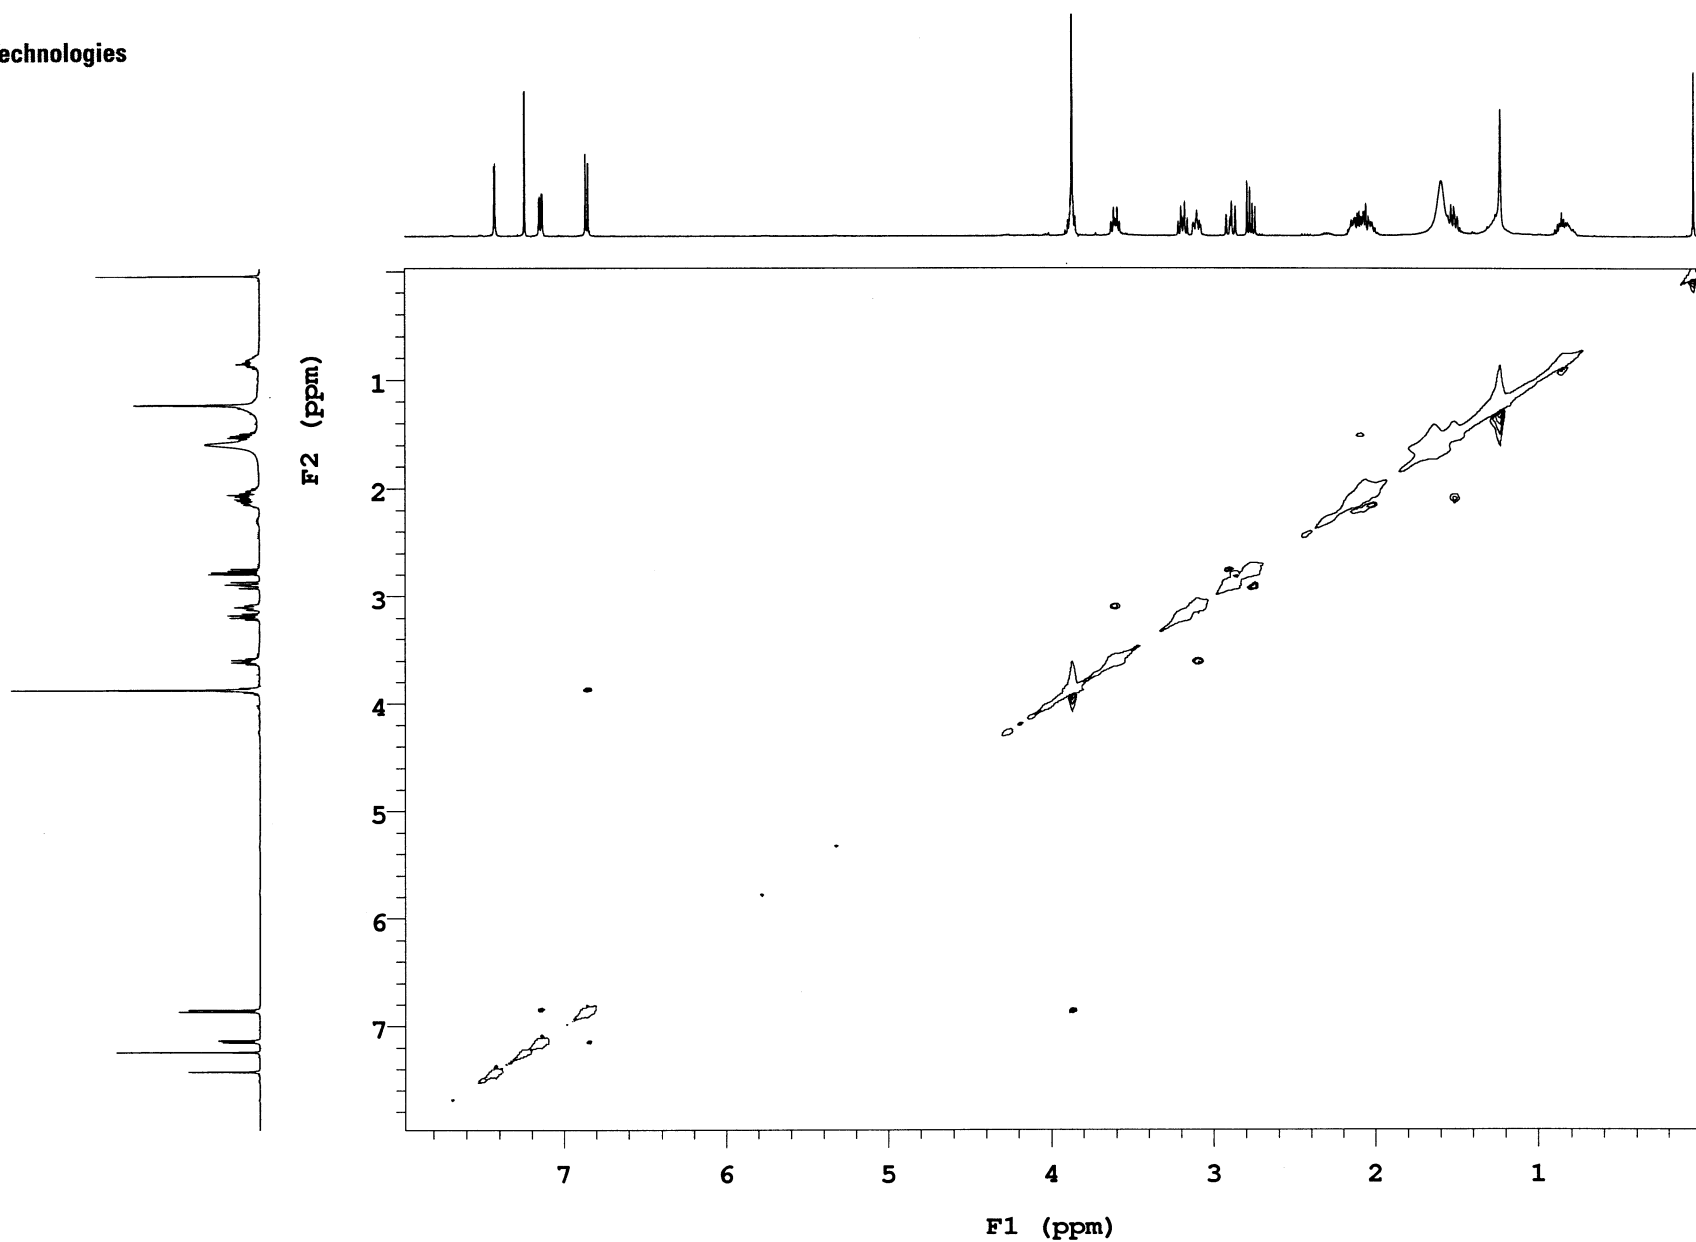

Fig S172. NOESY of compound syn-4h



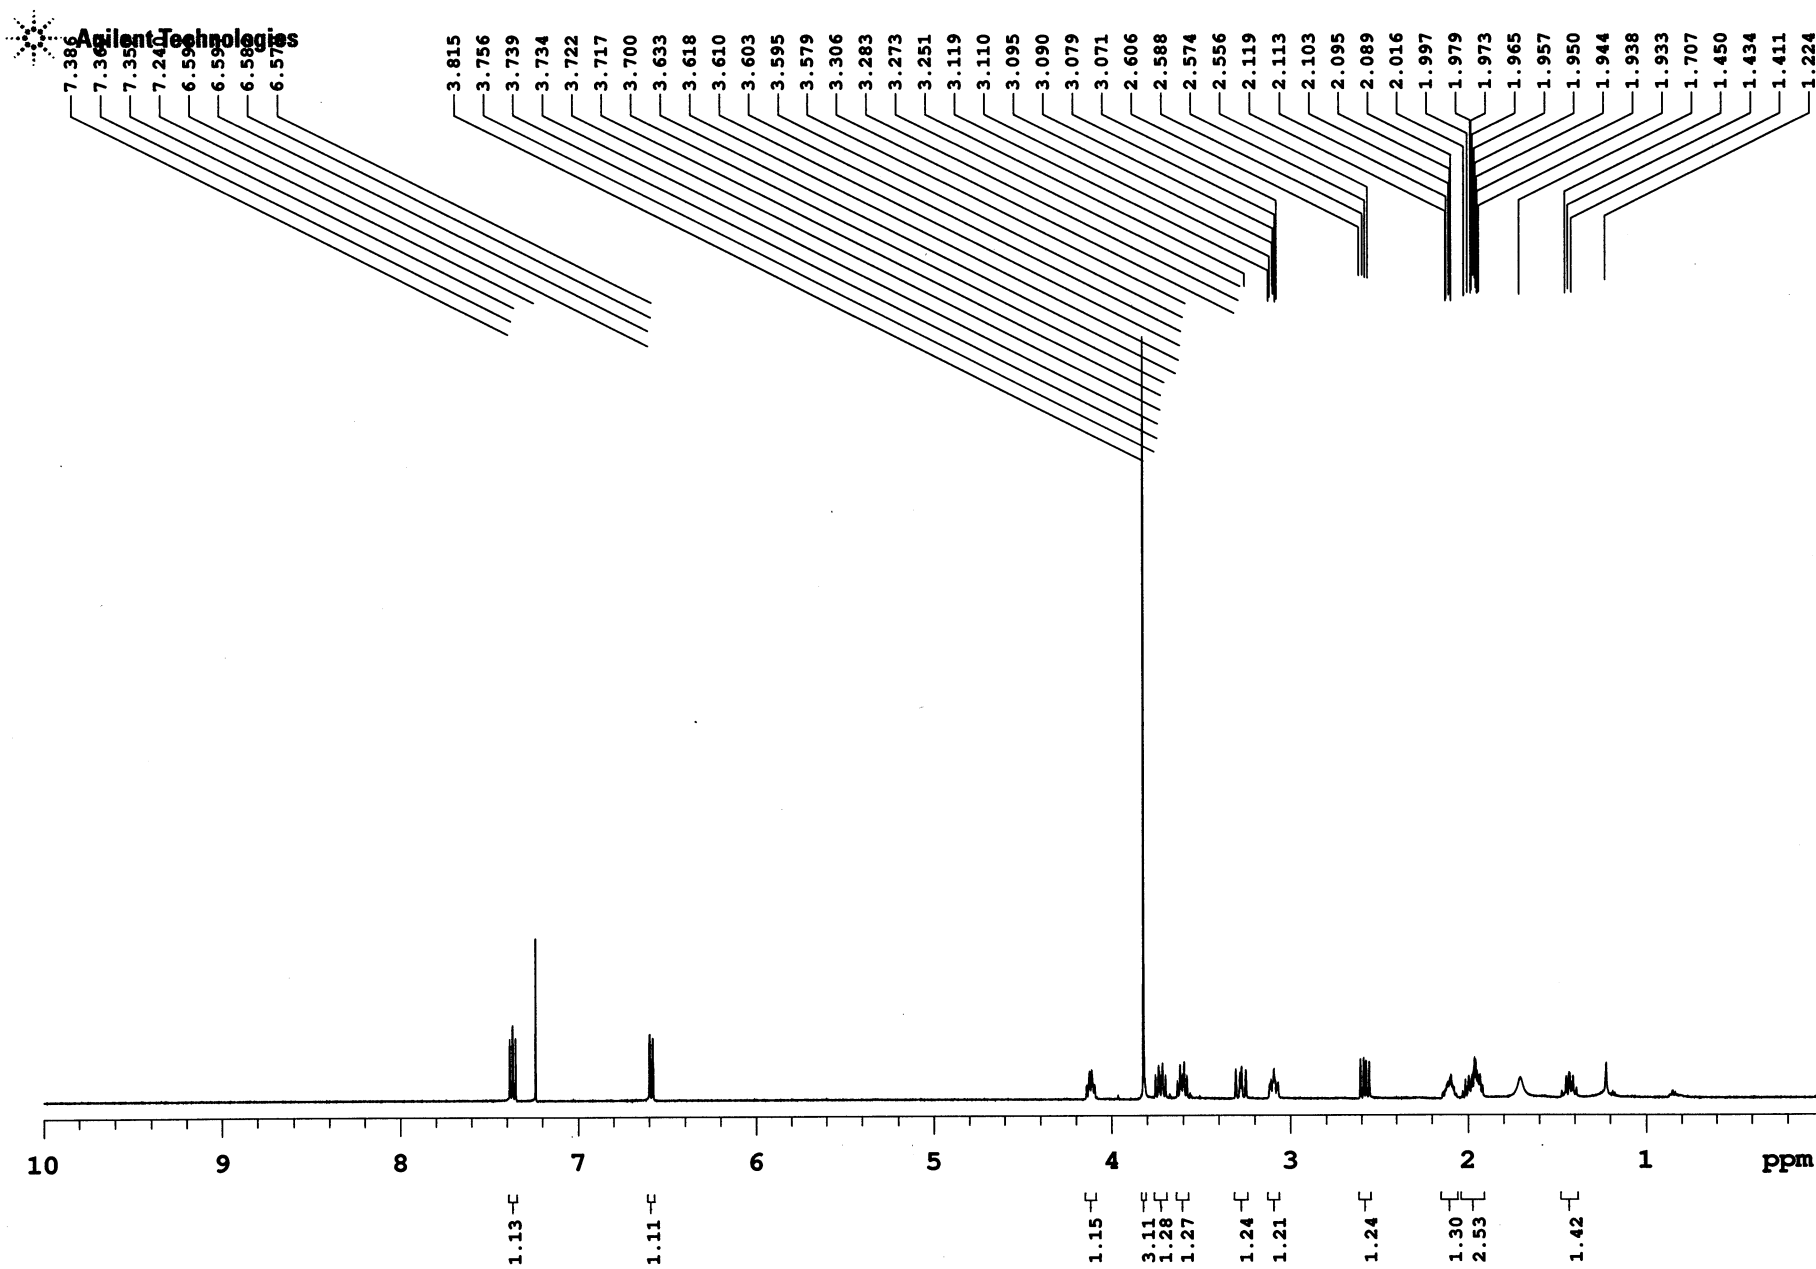

Sample Name **LCH-02-397**  
Date collected **2015-04-17**Pulse sequence **s2pul**  
Solvent **cdcl3**Temperature **50**  
Spectrometer **-**Study owner **vnmr2**  
Operator **vnmr2**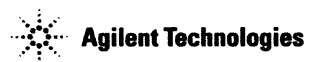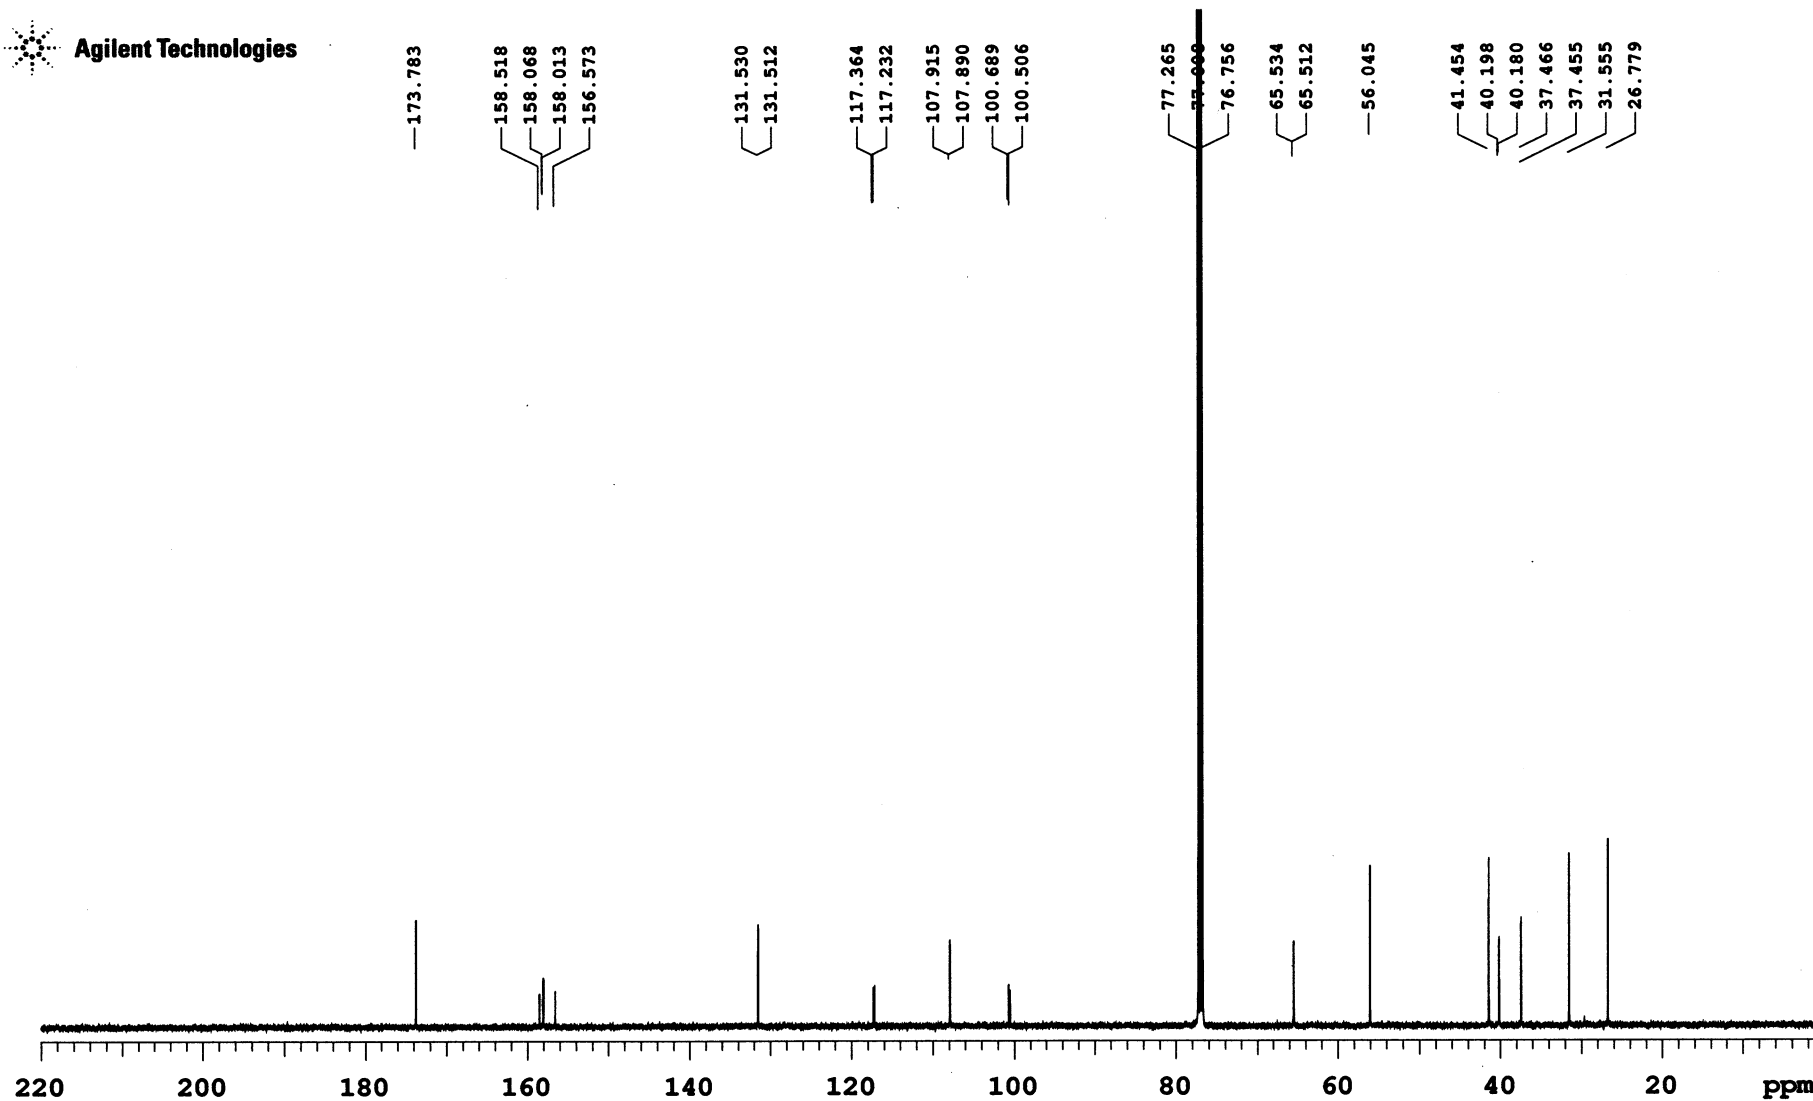Fig S174.  $^{13}\text{C}$  NMR ( $\text{CDCl}_3$ , 125 MHz) of compound syn-4i

Sample Name **LCH-02-397**  
Date collected **2015-04-17**Pulse sequence **DEPT**  
Solvent **cdcl3**Temperature **50**  
Spectrometer **--**Study owner **vnmr2**  
Operator **vnmr2**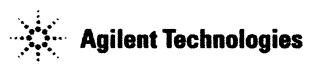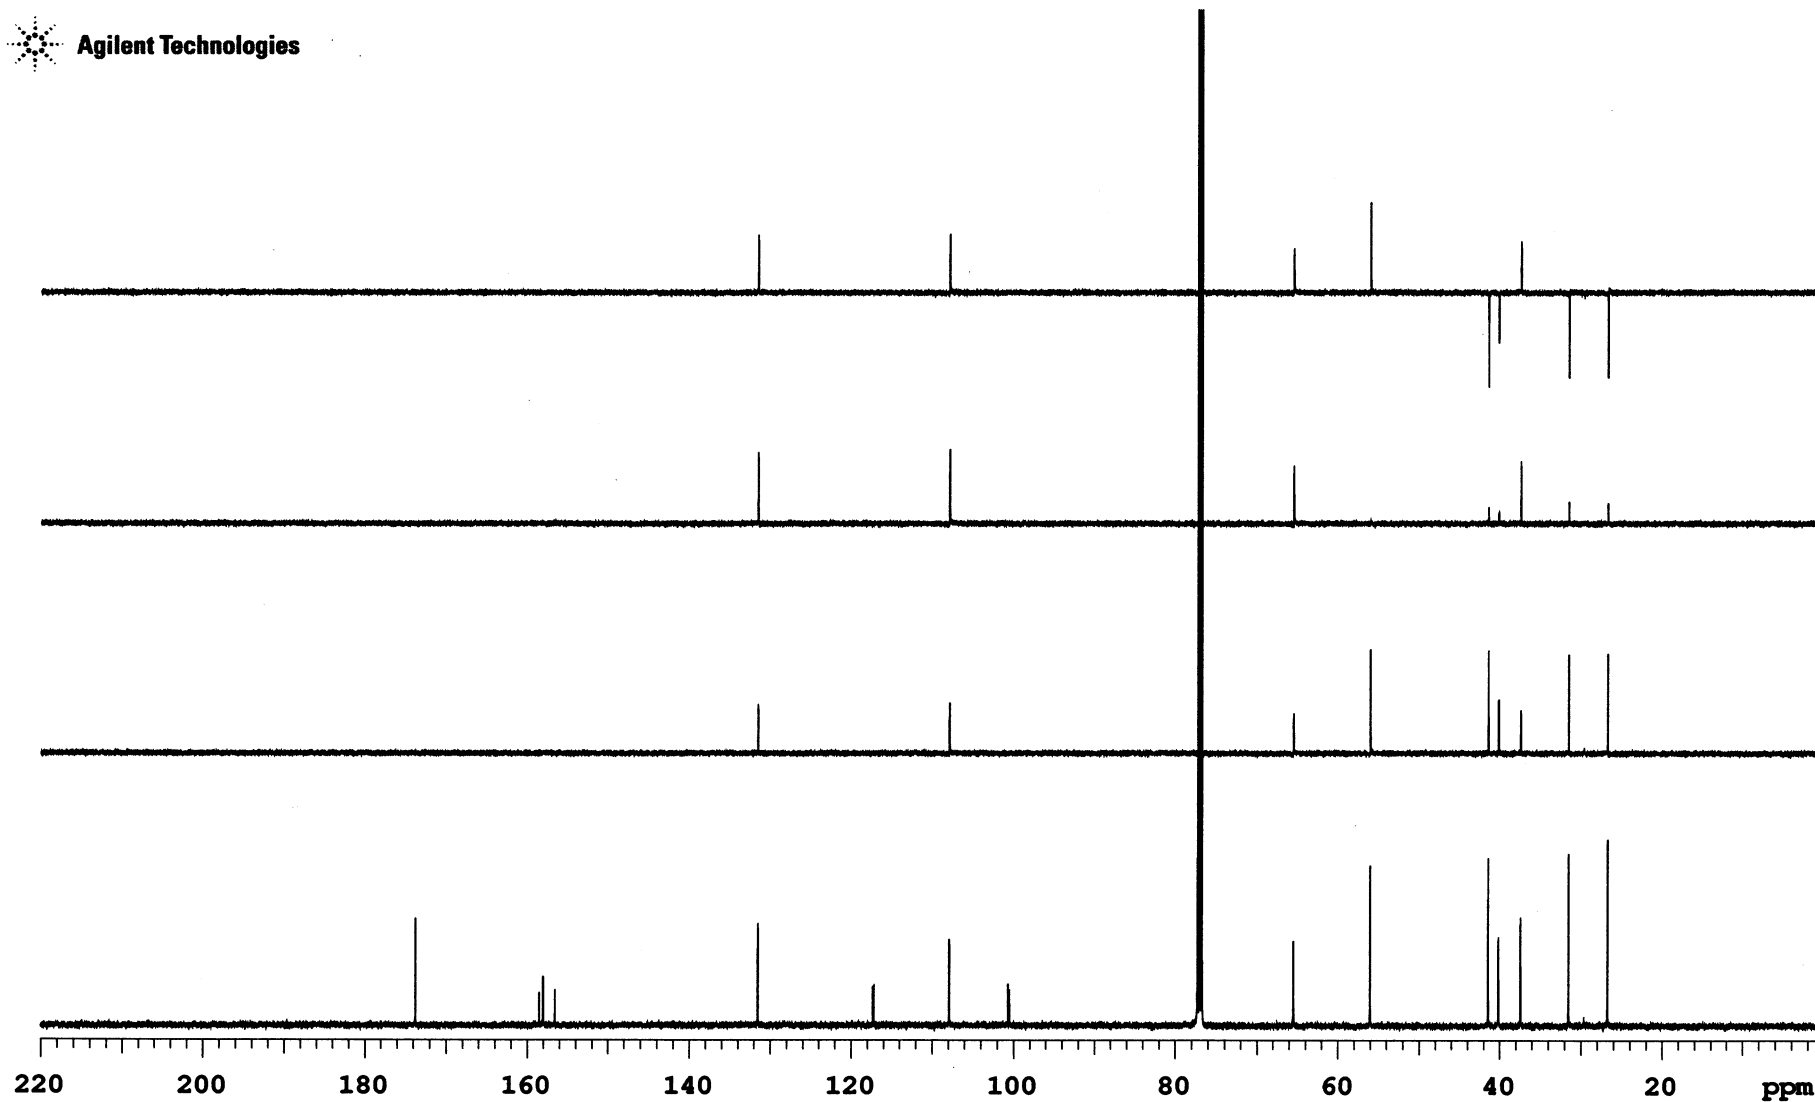

Fig S175. DEPT of compound syn-4i

LCH-02-397

Sample Name **LCH-02-397**  
Date collected **2015-04-17**Pulse sequence **gHSQC**  
Solvent **cdcl3**Temperature **50**  
Spectrometer **--**Study owner **vnmr2**  
Operator **vnmr2**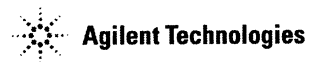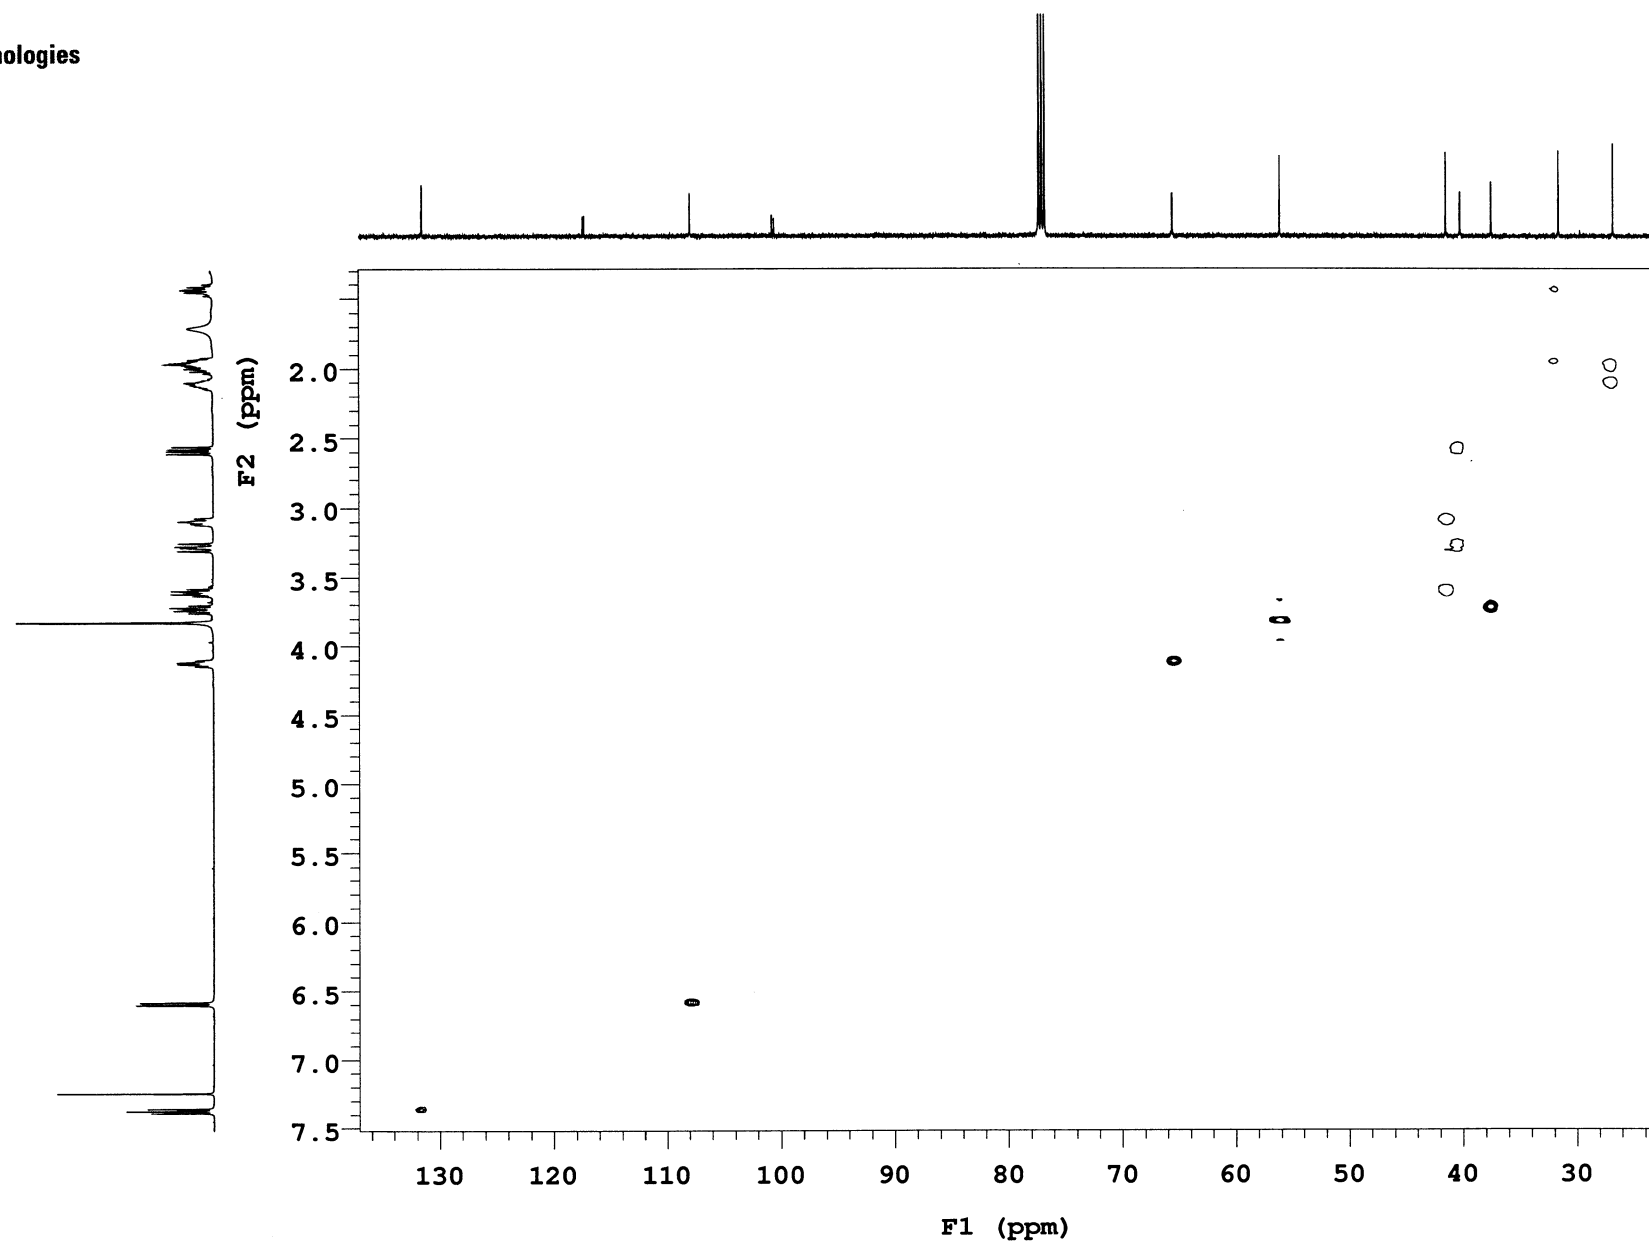

Fig S176. HSQC of compound syn-4i

LCH-02-397

Sample Name **LCH-02-397**  
Date collected **2015-04-17**Pulse sequence **gCOSY**  
Solvent **cdcl3**Temperature **50**  
Spectrometer **--**Study owner **vnmr2**  
Operator **vnmr2**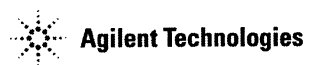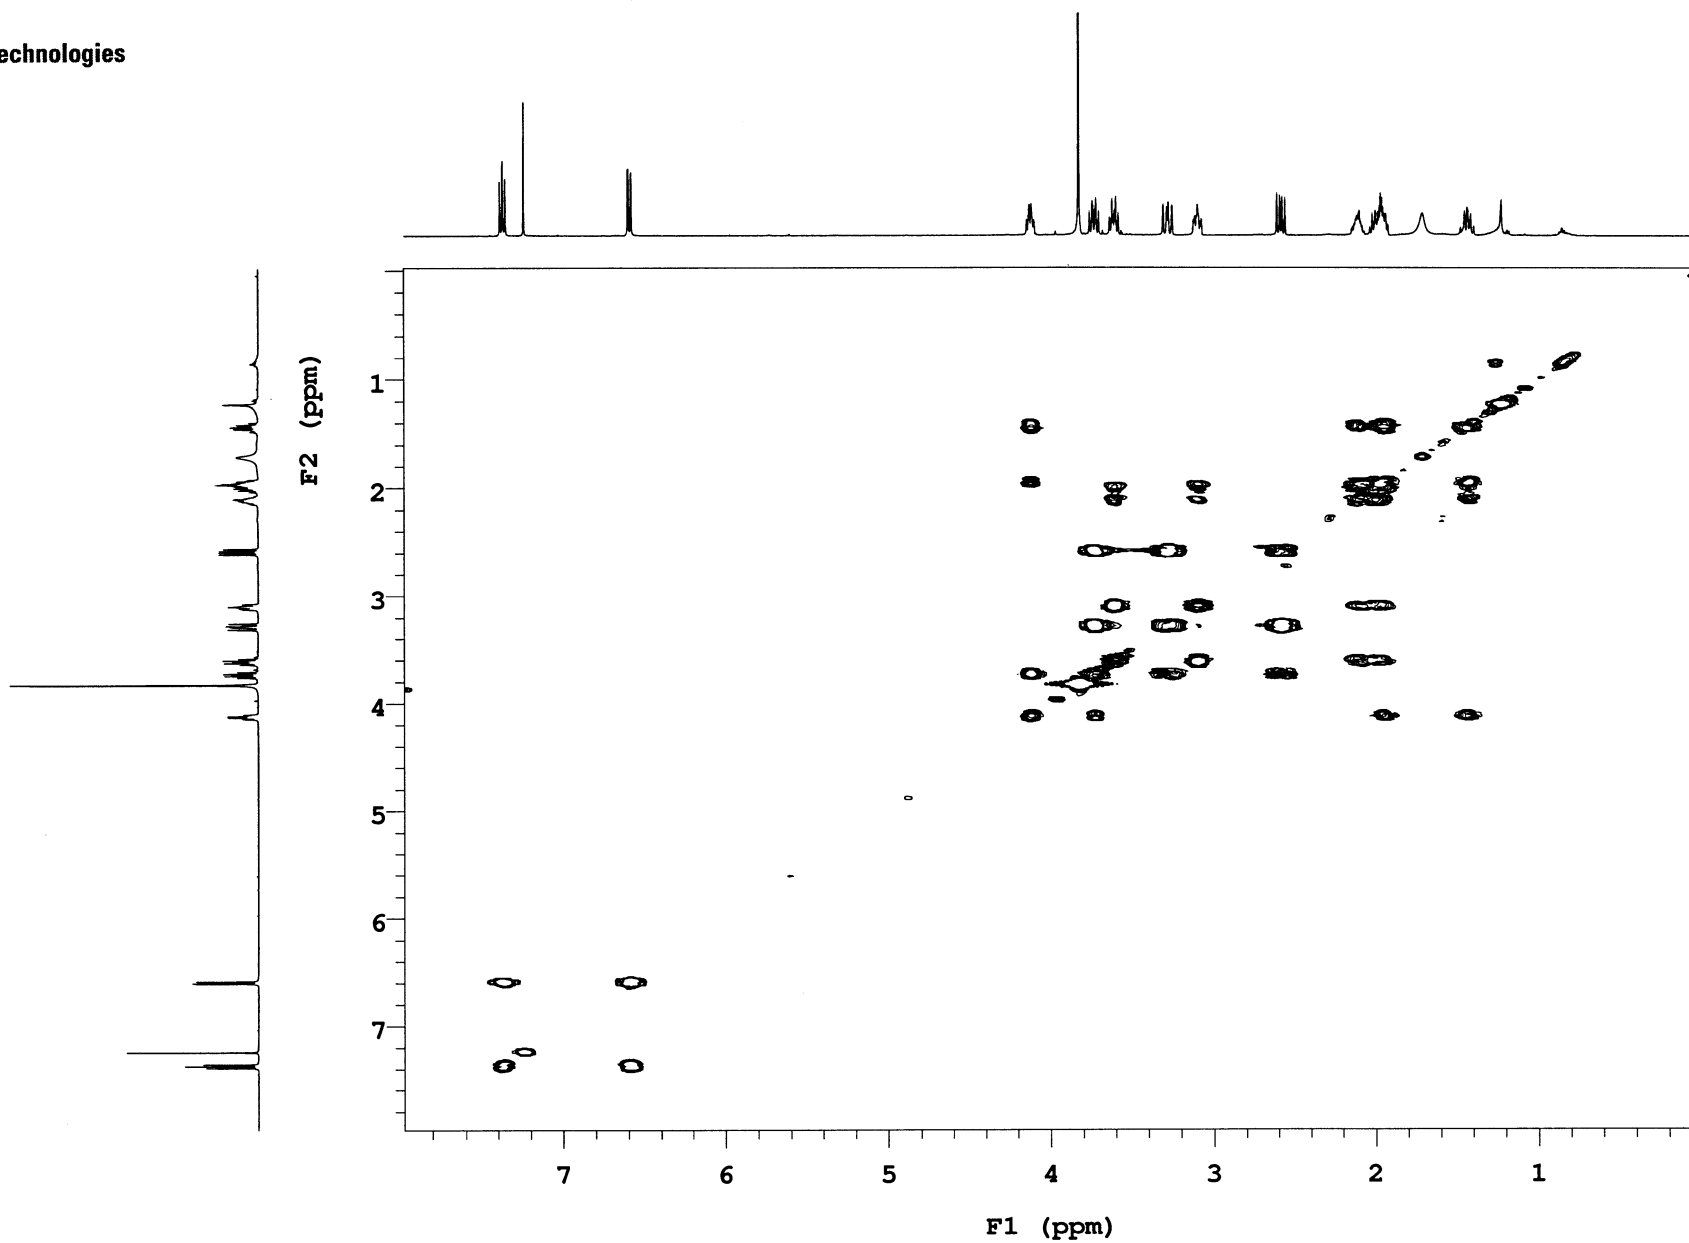

Fig S177. COSY of compound syn-4i

LCH-02-397

Sample Name **LCH-02-397**  
Date collected **2015-04-17**Pulse sequence **NOESY**  
Solvent **cdcl3**Temperature **50**  
Spectrometer **—**Study owner **vnmr2**  
Operator **vnmr2**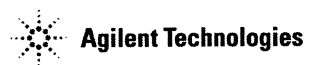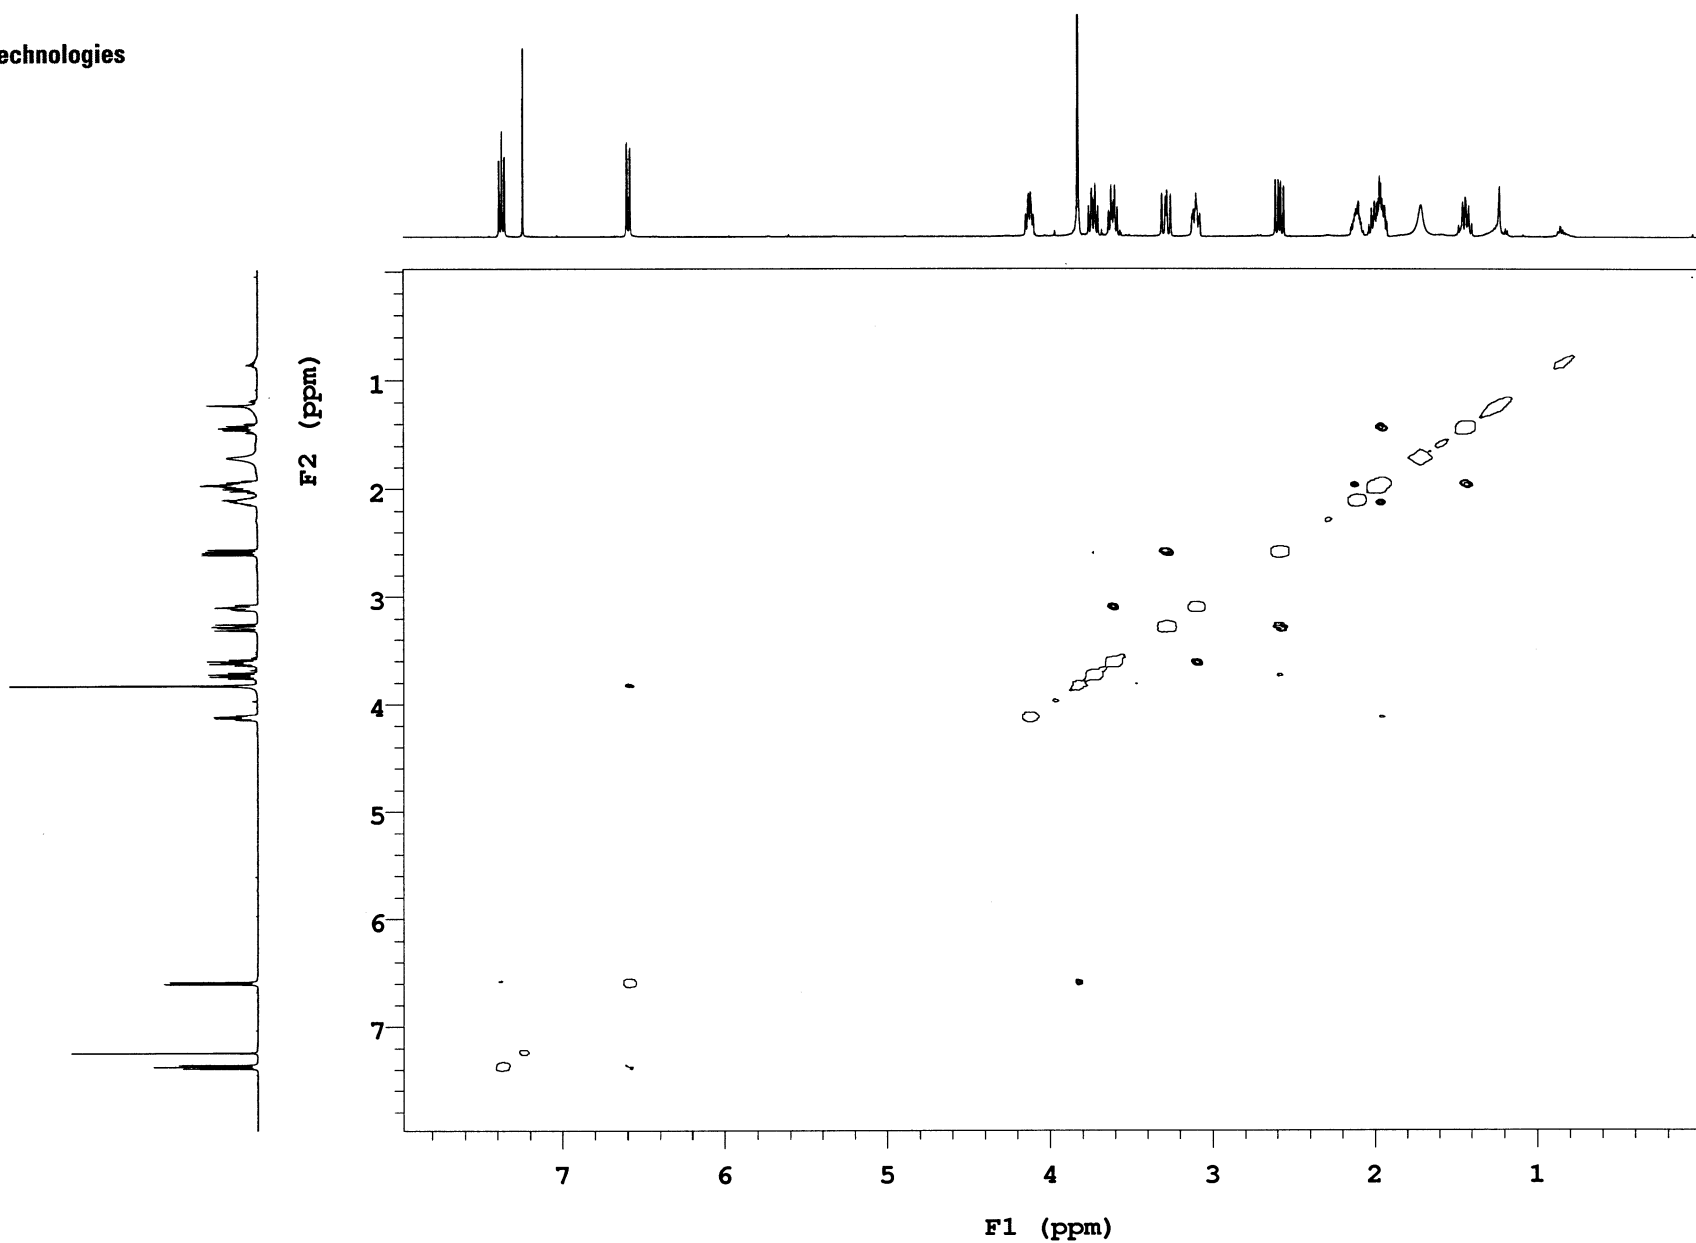

Fig S178. NOESY of compound syn-4i

Fig S179. <sup>1</sup>H NMR (CDCl<sub>3</sub>, 500 MHz) of compound anti-4a

LCH-02-338-p2

exp60 s2pu1

```

SAMPLE
date Jan 9 2015
solvent cdc13
file exp
ACQUISITION
sfrq 499.833
tn H1
at 3.000
np 48000
sw 8000.0
fb not used
bs 4
tpwr 62
pw 4.8
d1 1.000
tof 499.7
nt 4
ct 4
alock y
gain not used
FLAGS
il n
in n
dp y
hs nn
DISPLAY
sp -0.1
wp 5997.8
vs 104
sc 0
wc 210
hzmm 28.56
is 0.01
rfl 4636.2
rfp 3618.8
th 5
ins 100.000
nm cdc ph
    
```

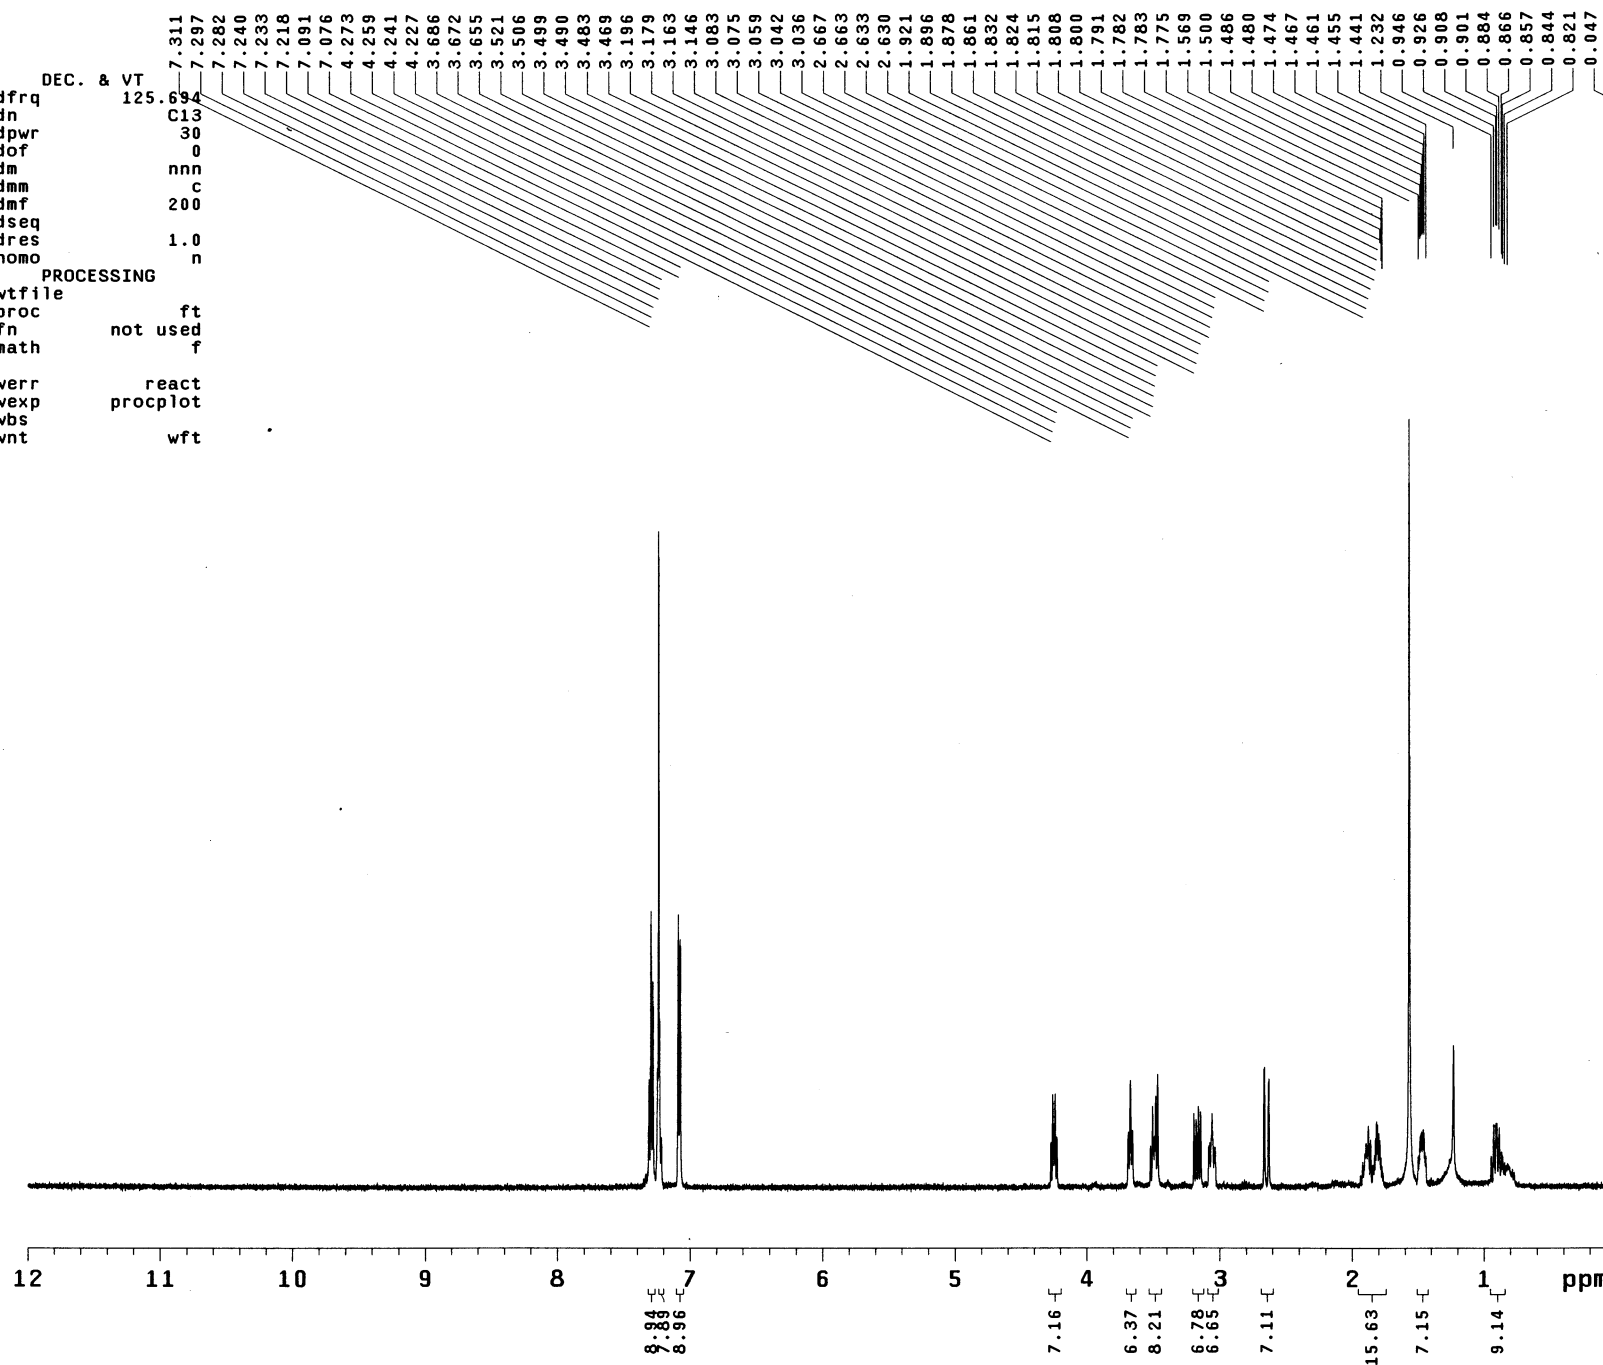

Fig S180. <sup>13</sup>C NMR (CDCl<sub>3</sub>, 125 MHz) of compound anti-4a

LCH-02-338-p2

exp61 s2pu1

|             |            |            |          |
|-------------|------------|------------|----------|
| SAMPLE      |            | DEC. & VT  |          |
| date        | Jan 9 2015 | dfrq       | 499.833  |
| solvent     | cdcl3      | dn         | H1       |
| file        | exp        | dpwr       | 44       |
| ACQUISITION |            | dof        | 0        |
| sfrq        | 125.696    | dm         | yyv      |
| tn          | C13        | dmm        | w        |
| at          | 1.000      | dmf        | 8868     |
| np          | 60332      | dseq       |          |
| sw          | 30165.9    | dres       | 1.0      |
| fb          | not used   | homo       | n        |
| bs          | 4          | PROCESSING |          |
| tpwr        | 59         | lb         | 1.00     |
| pw          | 4.8        | wtfile     |          |
| d1          | 1.000      | proc       | ft       |
| tof         | 1883.7     | fn         | 131072   |
| nt          | 6000       | math       | f        |
| ct          | 6000       |            |          |
| alock       | y          | werr       | react    |
| gain        | not used   | wexp       | procplot |
| FLAGS       |            | wbs        | testsn   |
| il          | n          | wnt        | wft      |
| in          | n          |            |          |
| dp          | y          |            |          |
| hs          | nn         |            |          |
| DISPLAY     |            |            |          |
| sp          | -1257.2    |            |          |
| wp          | 28906.5    |            |          |
| vs          | 800        |            |          |
| sc          | 0          |            |          |
| wc          | 210        |            |          |
| hzmm        | 137.65     |            |          |
| is          | 33.57      |            |          |
| rfl         | 10967.5    |            |          |
| rfp         | 9677.5     |            |          |
| th          | 7          |            |          |
| ins         | 100.000    |            |          |
| nm          | cdc ph     |            |          |

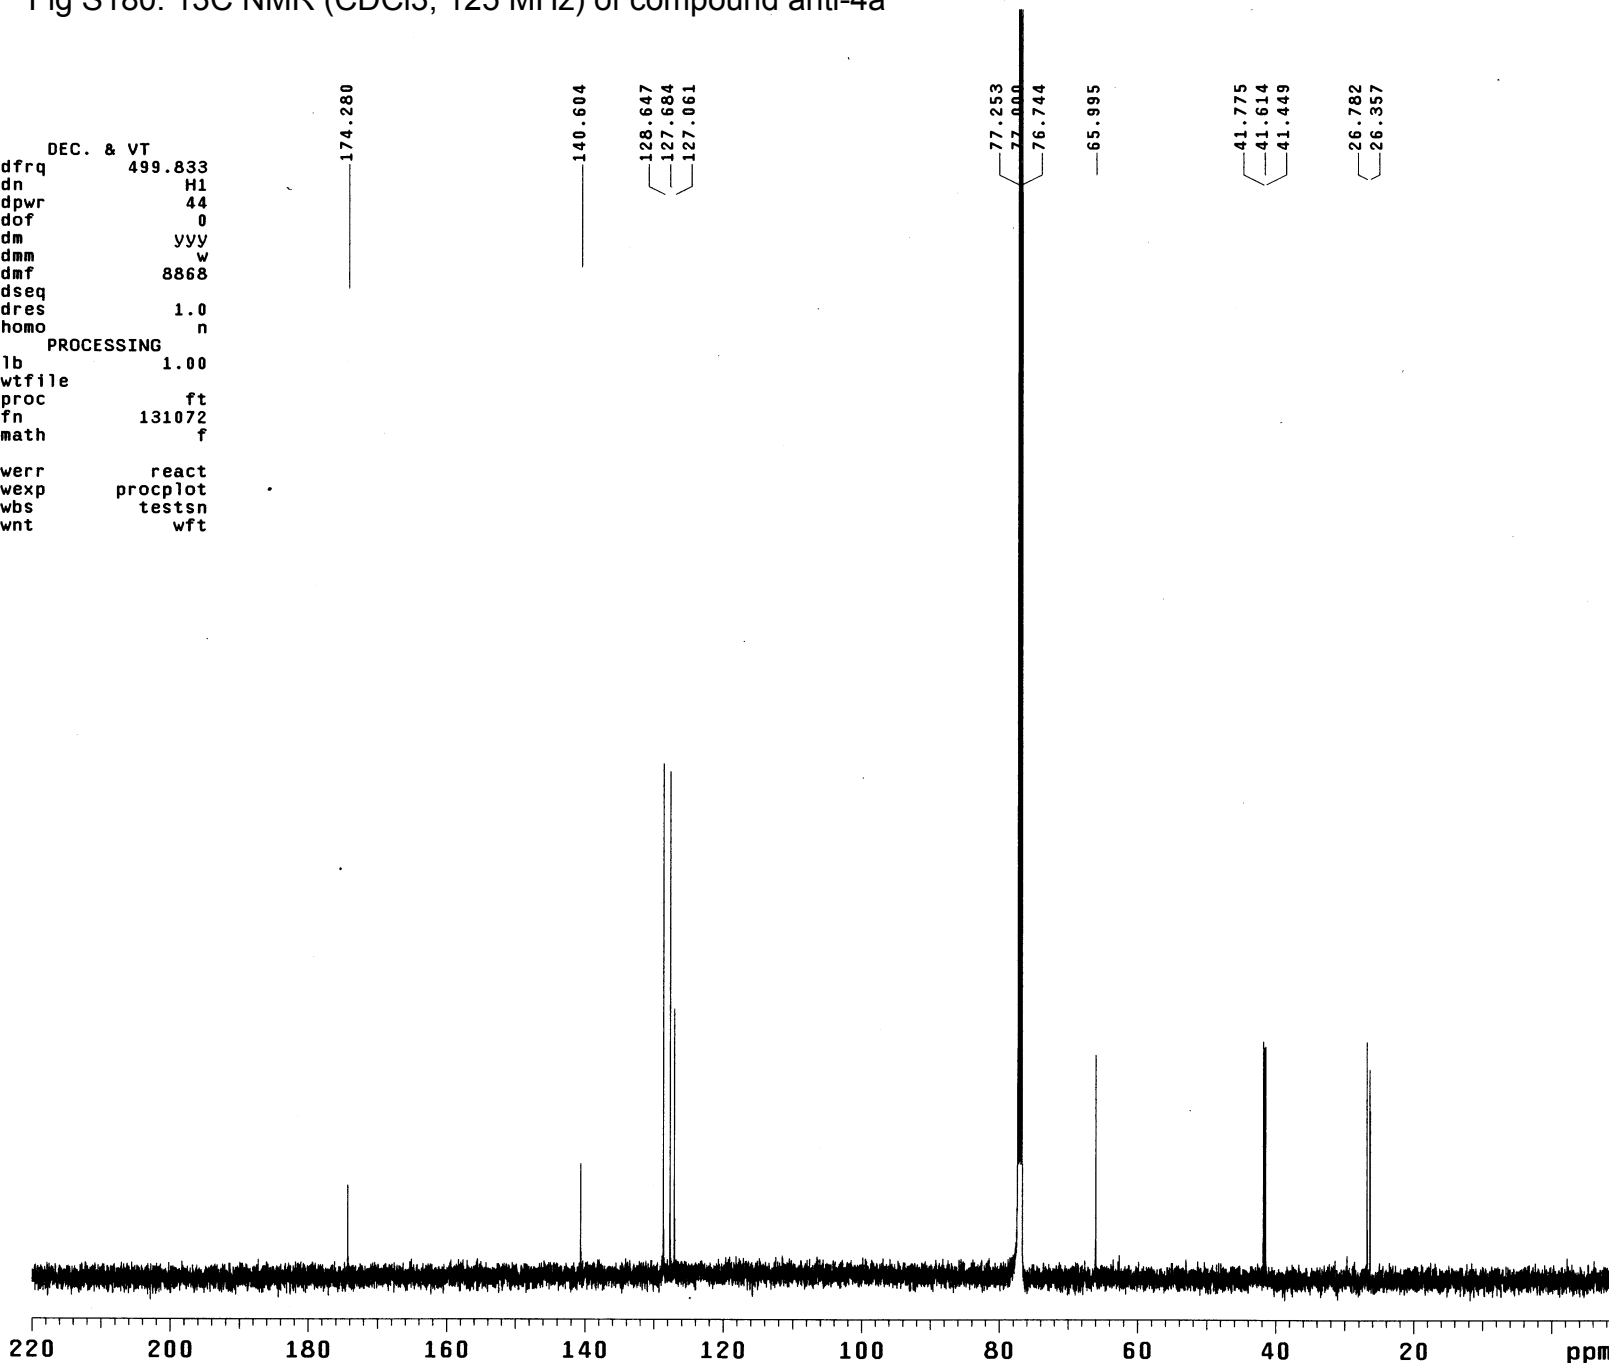



LCH-02-338-p2

Sample Name LCH-02-338-p2  
Date collected 2015-01-09Pulse sequence DEPT  
Solvent cdcl3Temperature 100  
Spectrometer --Study owner vnmr2  
Operator vnmr2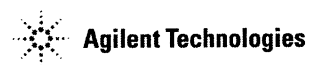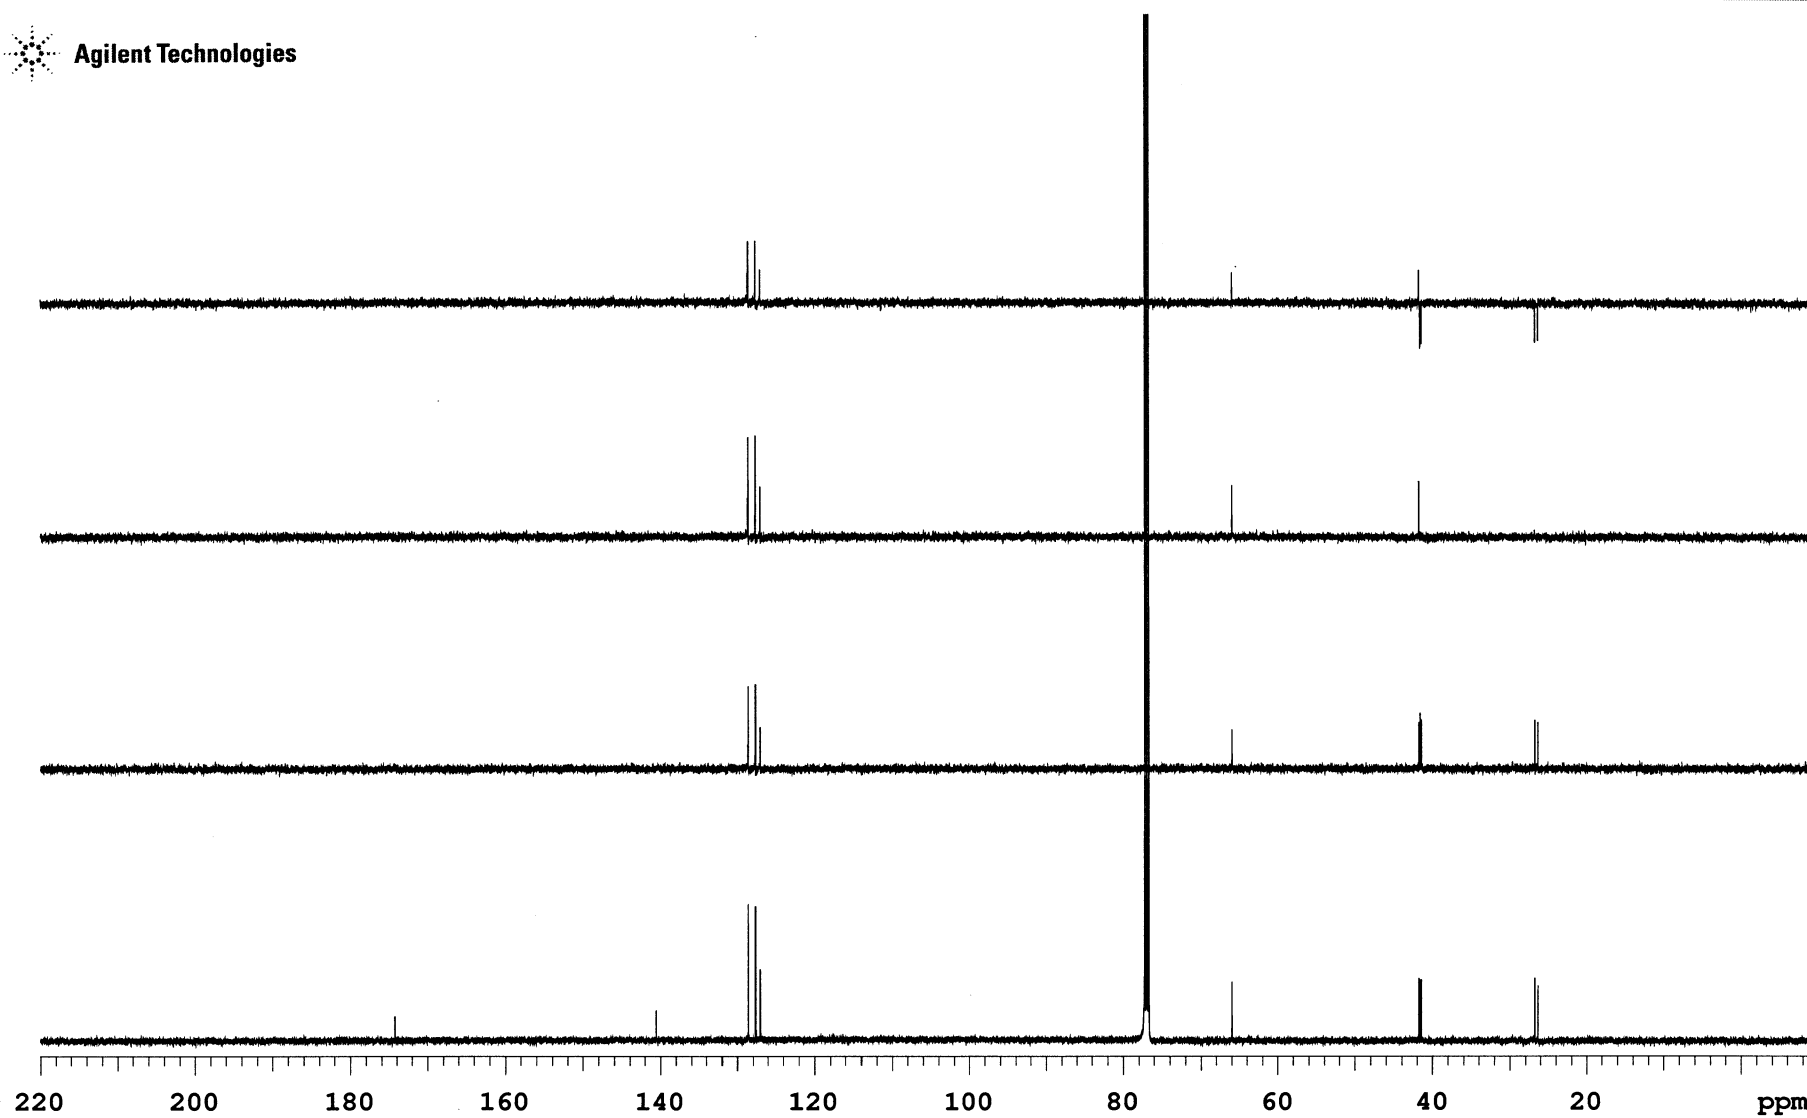

Fig S181. DEPT of compound anti-4a

Fig S182. HSQC of compound anti-4a

LCH-02-338-p2

exp65 gHSQC

| SAMPLE           | FLAGS          | ACQUISITION | ARRAYS       |
|------------------|----------------|-------------|--------------|
| date Jan 9 2015  | hs             | n           | array phase  |
| solvent cdc13    | sspu1          | y           | arraydim 256 |
| sample undefined | PFGflg         | y           |              |
| ACQUISITION      | hsglv1         | 1004        | phase        |
| sw 4001.6        | SPECIAL        | 1           | 1            |
| at 0.128         | temp not used  | 2           | 2            |
| np 1024          | gain 54        |             |              |
| fb not used      | spin 0         |             |              |
| ss 32            | GRADIENTS      |             |              |
| d1 1.000         | gzlv11 1004    |             |              |
| nt 8             | gt1 0.002000   |             |              |
| 2D ACQUISITION   | gzlv13 505     |             |              |
| sw1 21367.5      | gt3 0.001000   |             |              |
| n1 128           | gstab 0.000500 |             |              |
| phase arrayed    | F2 PROCESSING  |             |              |
| TRANSMITTER      | gf 0.059       |             |              |
| tn H1            | gfs not used   |             |              |
| sfrq 499.832     | fn 1024        |             |              |
| tof -499.9       | F1 PROCESSING  |             |              |
| tpwr 62          | gf1 0.006      |             |              |
| pw 13.800        | gfs1 not used  |             |              |
| DECOUPLER        | proc1 1p       |             |              |
| dn C13           | fn1 2048       |             |              |
| dof -2515.1      | DISPLAY        |             |              |
| dm nny           | sp 671.1       |             |              |
| dmm ccp          | wp 3134.1      |             |              |
| dmf 32258        | sp1 2922.1     |             |              |
| dpwr 43          | wp1 13646.8    |             |              |
| pwxlv1 61        | rfl 2145.5     |             |              |
| pwx 11.000       | rfl1 2128.8    |             |              |
| HSQC             | rfl1 9587.3    |             |              |
| j1xh 140.0       | rfl1 8294.4    |             |              |
| nullflg y        | PLOT           |             |              |
| mult 2           | wc 150.0       |             |              |
|                  | sc 6.2         |             |              |
|                  | wc2 116.2      |             |              |
|                  | sc2 0          |             |              |
|                  | vs 175         |             |              |
|                  | th 6           |             |              |
|                  | ai cdc ph      |             |              |

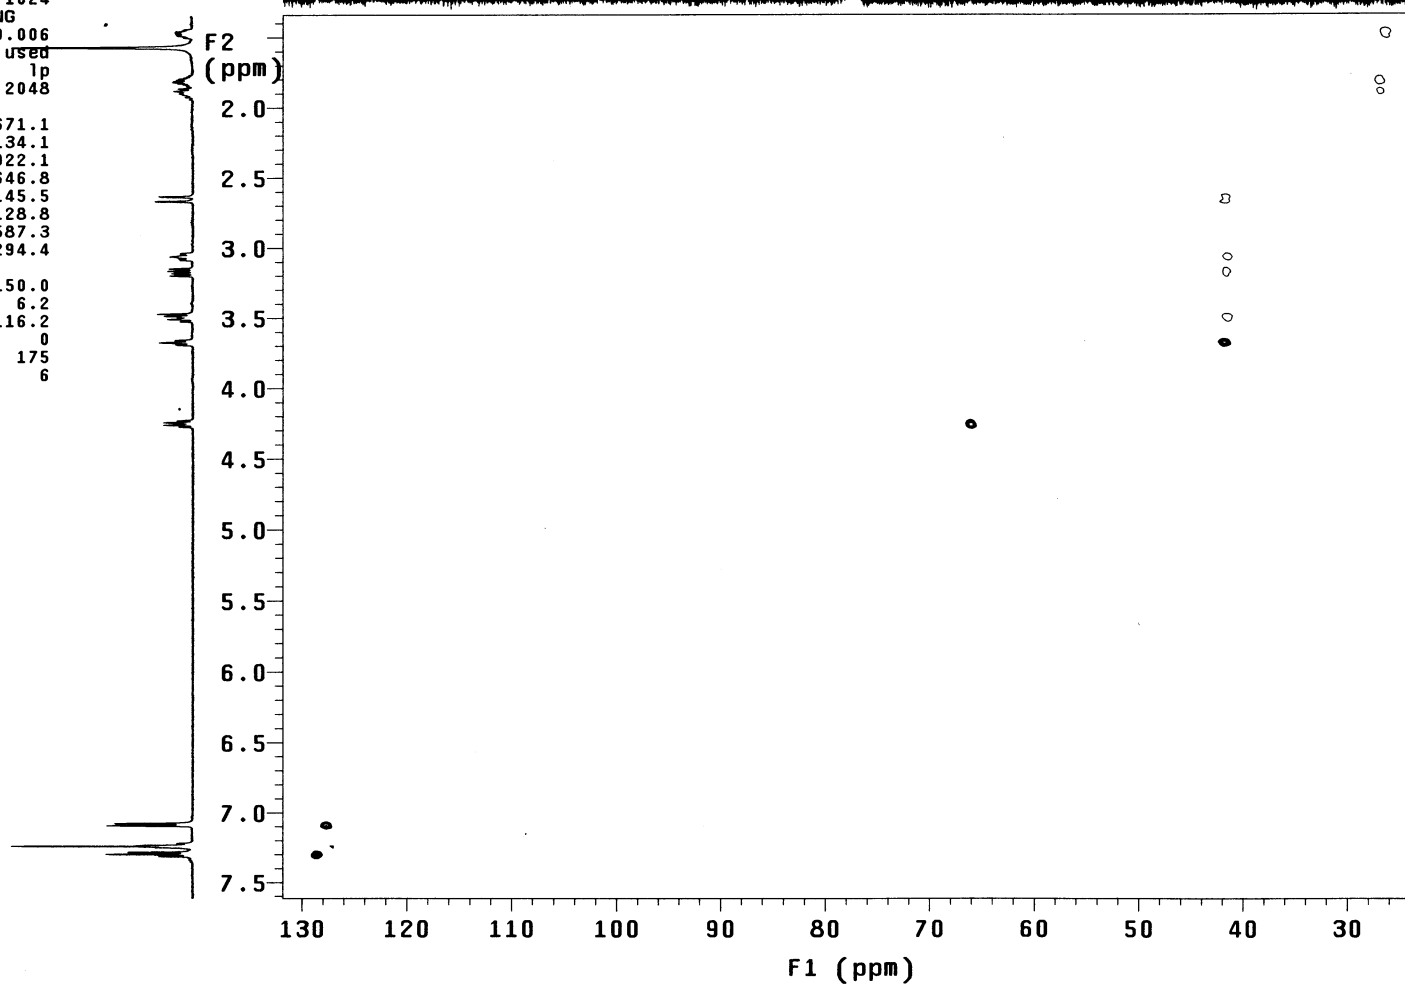

LCH-02-338-p2

exp63 gCOSY

| SAMPLE         |            | FLAGS         |            |
|----------------|------------|---------------|------------|
| date           | Jan 9 2015 | hs            | nn         |
| solvent        | cdc13      | sspu1         | n          |
| sample         | undefined  | hsglv1        | 1004       |
| ACQUISITION    |            | SPECIAL       |            |
| sw             | 4001.6     | temp          | not used   |
| at             | 0.128      | gain          | 34         |
| np             | 1024       | spin          | 0          |
| fb             | not used   | F2            | PROCESSING |
| ss             | 16         | sb            | -0.064     |
| d1             | 1.000      | sbs           | not used   |
| nt             | 8          | fn            | 1024       |
| 2D ACQUISITION |            | F1 PROCESSING |            |
| sw1            | 4001.6     | sb1           | -0.032     |
| ni             | 128        | sbs1          | not used   |
| TRANSMITTER    |            | DISPLAY       |            |
| tn             | H1         | sp            | 292.2      |
| sfrq           | 499.832    | wp            | 3470.1     |
| tof            | -499.9     | sp1           | 291.1      |
| tpwr           | 62         | wp1           | 3478.0     |
| pw             | 13.800     | rfl           | 3564.7     |
| GRADIENTS      |            | rfp           | 3544.3     |
| gzlv11         | 1004       | rfl1          | 3565.8     |
| gt1            | 0.001000   | rfp1          | 3544.3     |
| gstab          | 0.000500   | PLOT          |            |
| DECOUPLER      |            | wc            | 155.0      |
| dn             | C13        | sc            | 10.0       |
| dm             | nnn        | wc2           | 155.0      |
|                |            | sc2           | 0          |
|                |            | vs            | 175        |
|                |            | th            | 10         |
|                |            | ai            | cdc av     |

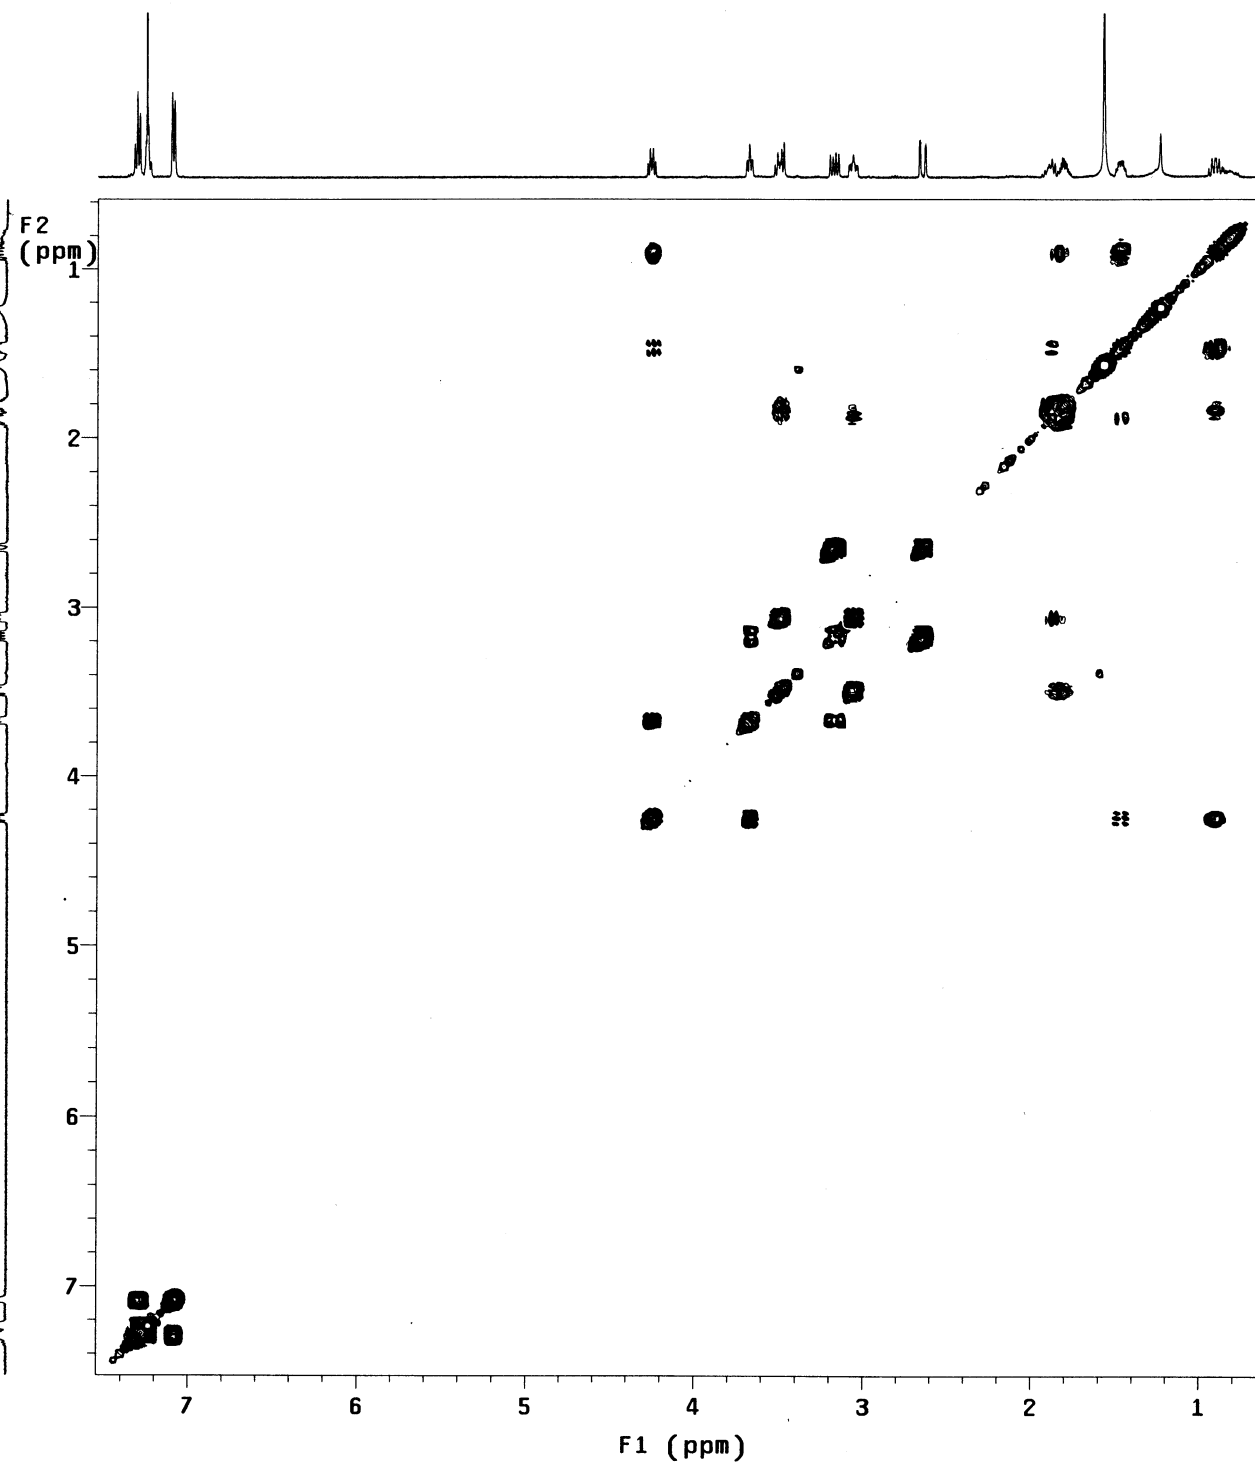

Fig S183. COSY of compound anti-4a

LCH-02-338-p2

exp64 NOESY

| SAMPLE         |            | FLAGS         |          |
|----------------|------------|---------------|----------|
| date           | Jan 9 2015 | hs            | n        |
| solvent        | cdcl3      | sspul         | y        |
| sample         | undefined  | PFGflg        | y        |
| ACQUISITION    |            | hsgivl        | 1004     |
| sw             | 4001.6     | SPECIAL       |          |
| at             | 0.128      | temp          | not used |
| np             | 1024       | gain          | 34       |
| fb             | not used   | spin          | 0        |
| ss             | 32         | F2 PROCESSING |          |
| d1             | 1.000      | gf            | 0.059    |
| nt             | 16         | gfs           | not used |
| 2D ACQUISITION |            | fn            | 1024     |
| sw1            | 4001.6     | F1 PROCESSING |          |
| ni             | 200        | gf1           | 0.046    |
| TRANSMITTER    |            | gfs1          | not used |
| tn             | H1         | procl         | lp       |
| sfrq           | 499.832    | fn1           | 1024     |
| tof            | -499.9     | DISPLAY       |          |
| tpwr           | 62         | sp            | 266.0    |
| pw             | 13.800     | wp            | 3571.7   |
| NOESY          |            | sp1           | 273.5    |
| mix            | 0.600      | wp1           | 3563.9   |
| PRESATURATION  |            | rfl           | 3559.7   |
| satmode        | nnnn       | rfl1          | 3544.3   |
| satpwr         | 0          | rfl1          | 3559.9   |
| satdly         | 0          | rfl1          | 3544.3   |
| satfrq         | 0          | PLOT          |          |
| DECOUPLER      |            | wc            | 155.0    |
| dn             | C13        | sc            | 10.0     |
| dm             | nnn        | wc2           | 155.0    |
|                |            | sc2           | 0        |
|                |            | vs            | 175      |
|                |            | th            | 2        |
|                |            | ai            | ph       |

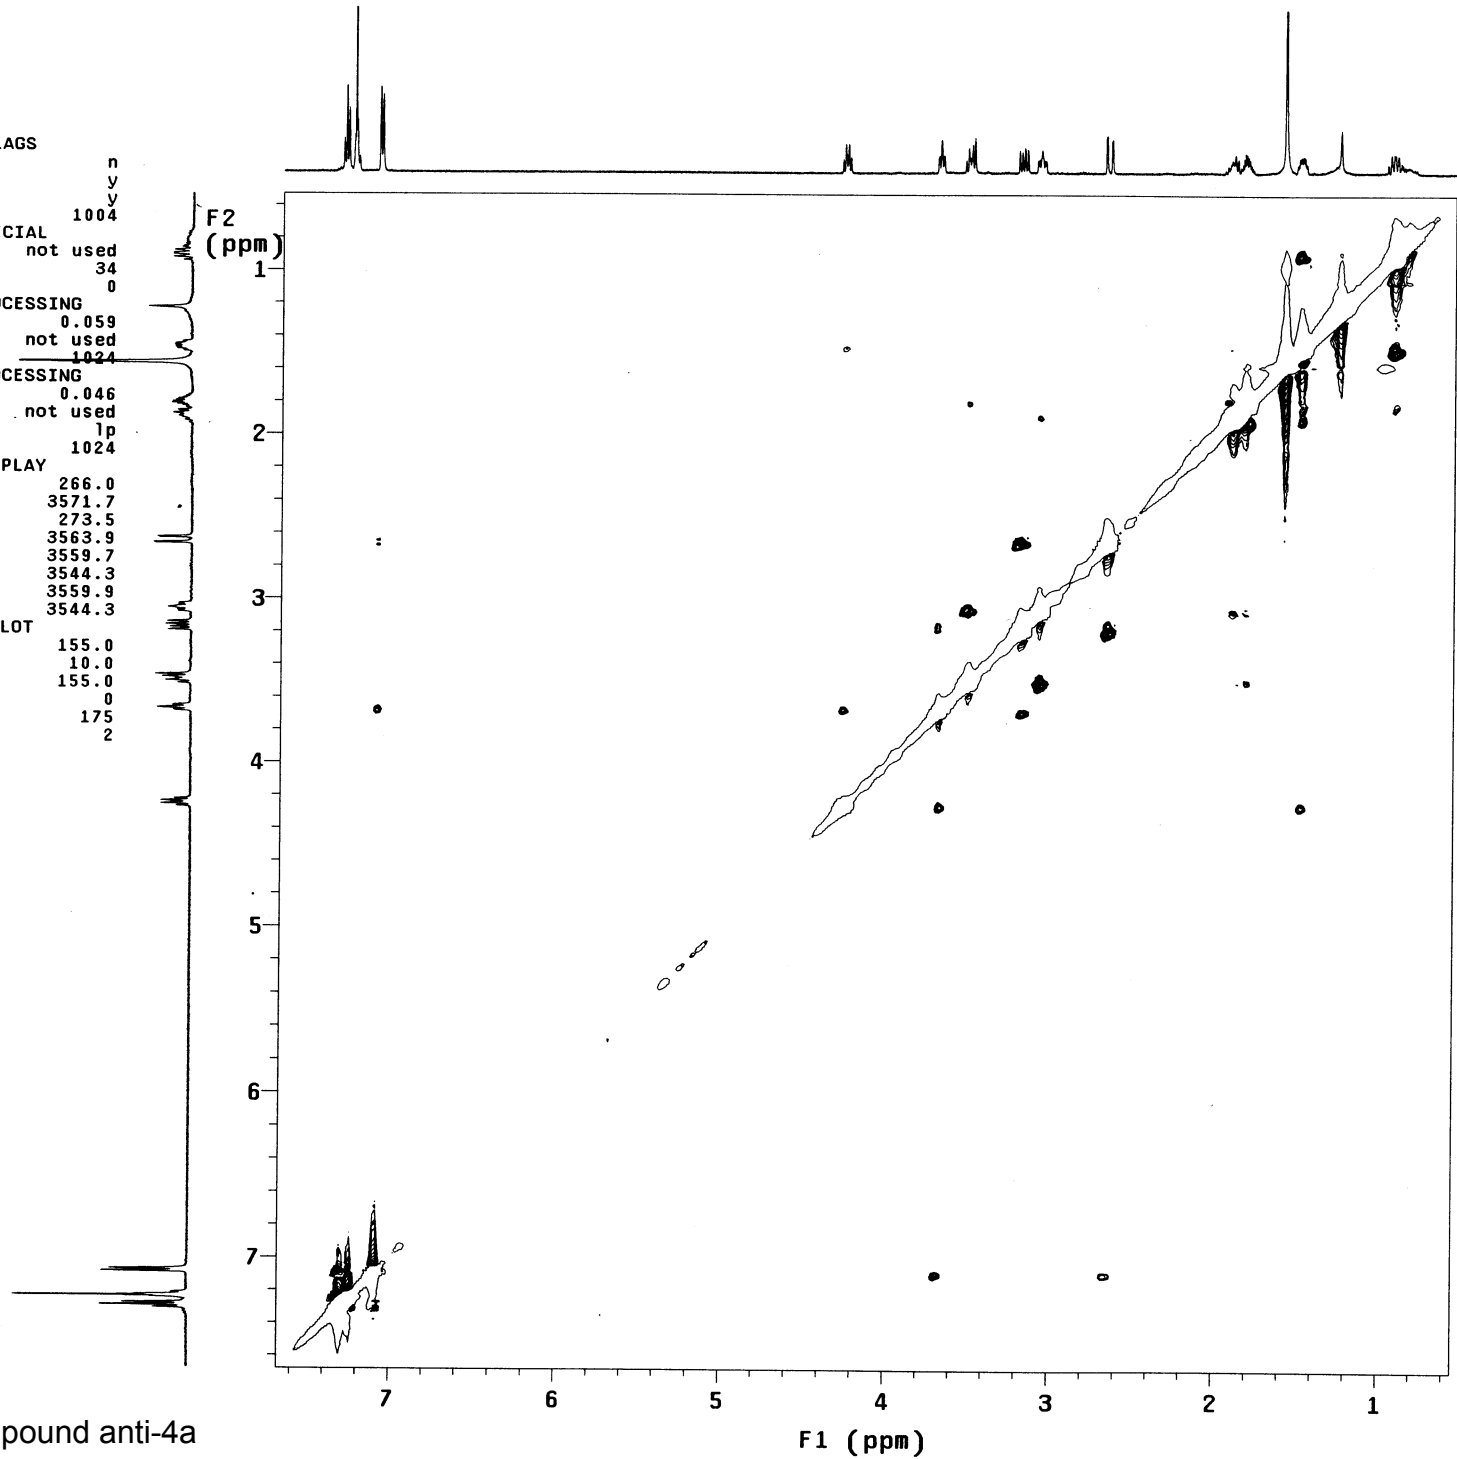

Fig S184. NOESY of compound anti-4a

LCH-02-395

Sample Name **LCH-02-395**  
Date collected **2015-06-04**Pulse sequence **PROTON**  
Solvent **cdcl3**Temperature **25**  
Spectrometer **Agilent-NMR-inova500**Study owner **vnmr2**  
Operator **vnmr2**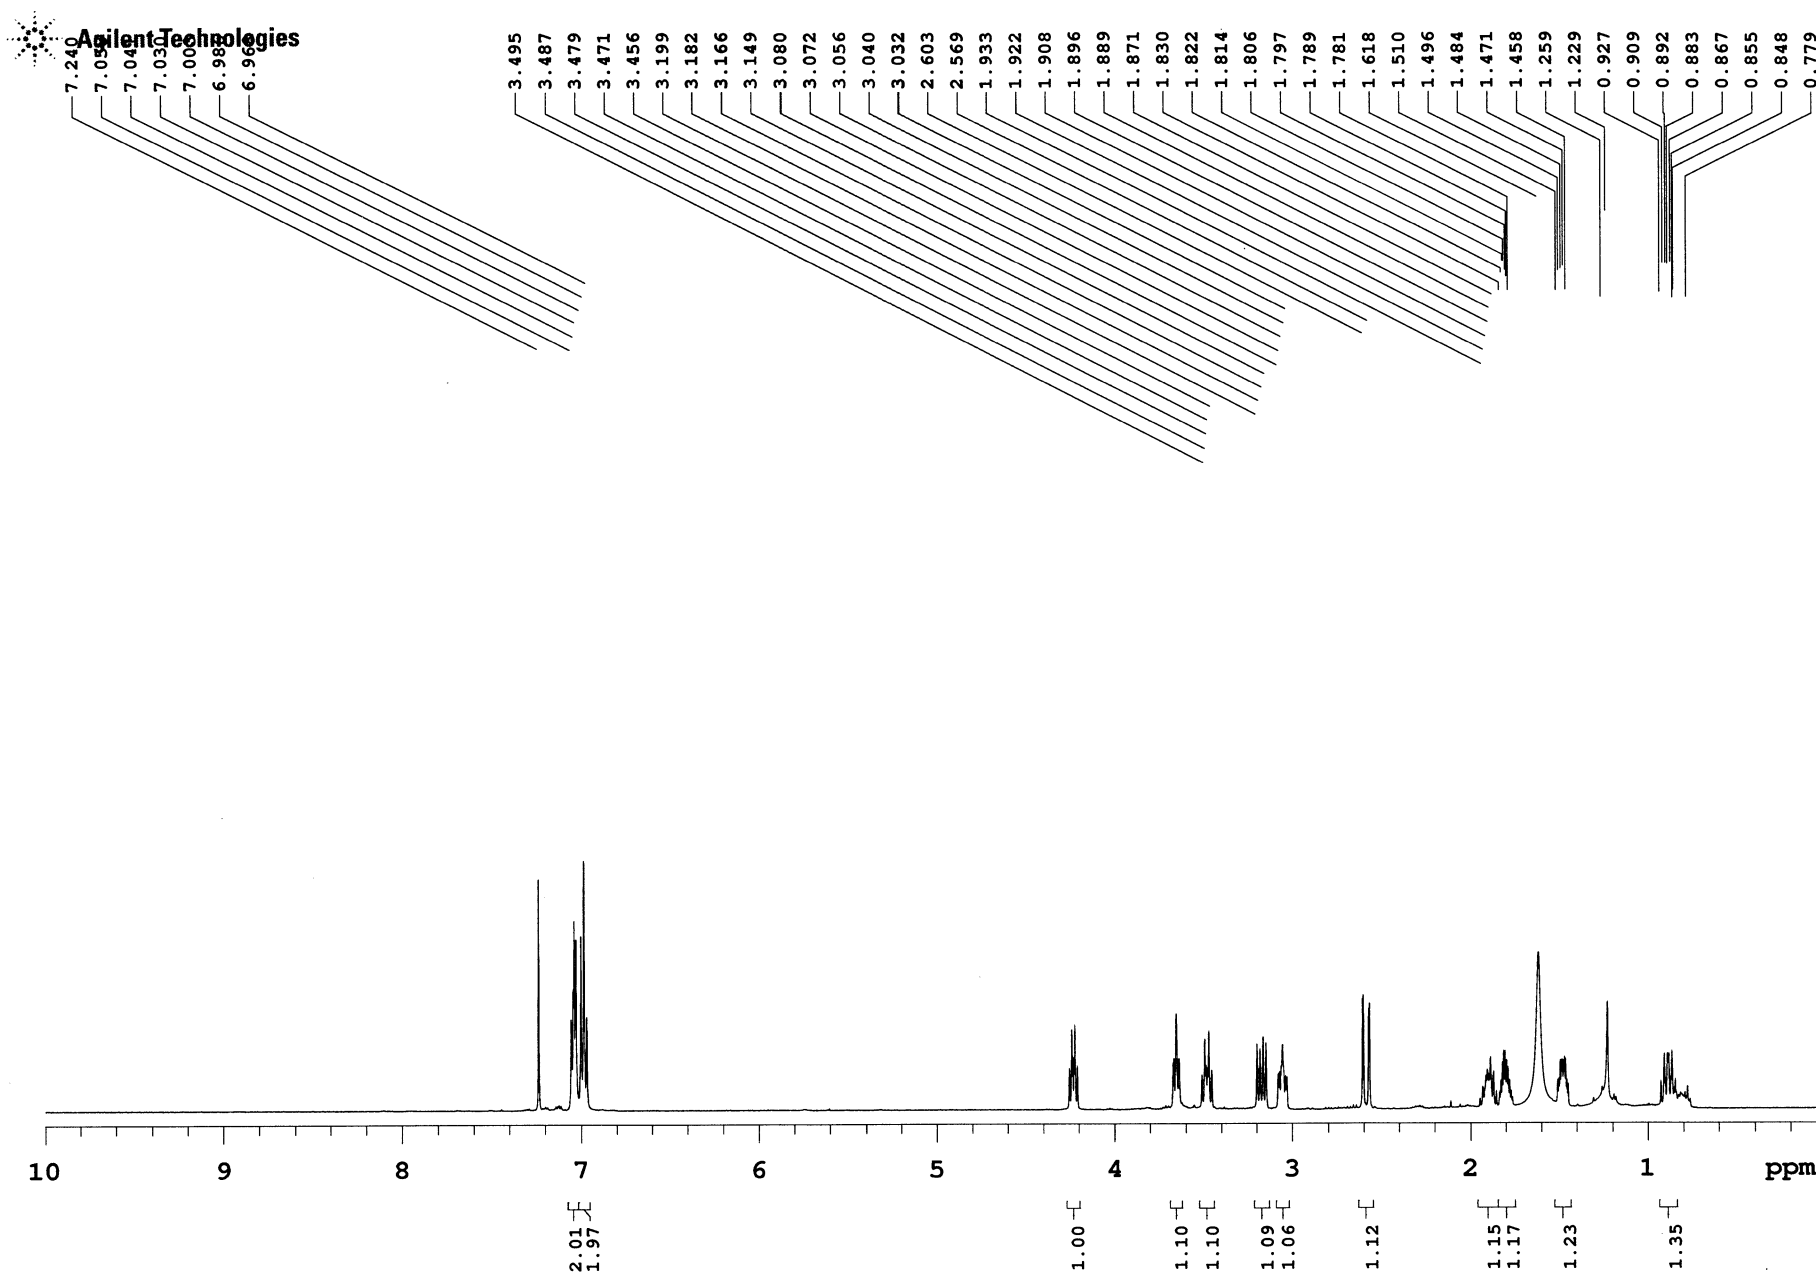

LCH-02-395

Sample Name **LCH-02-395**  
Date collected **2015-04-13**Pulse sequence **s2pul**  
Solvent **cdcl3**Temperature **50**  
Spectrometer **-**Study owner **vnmr2**  
Operator **vnmr2**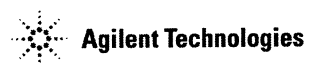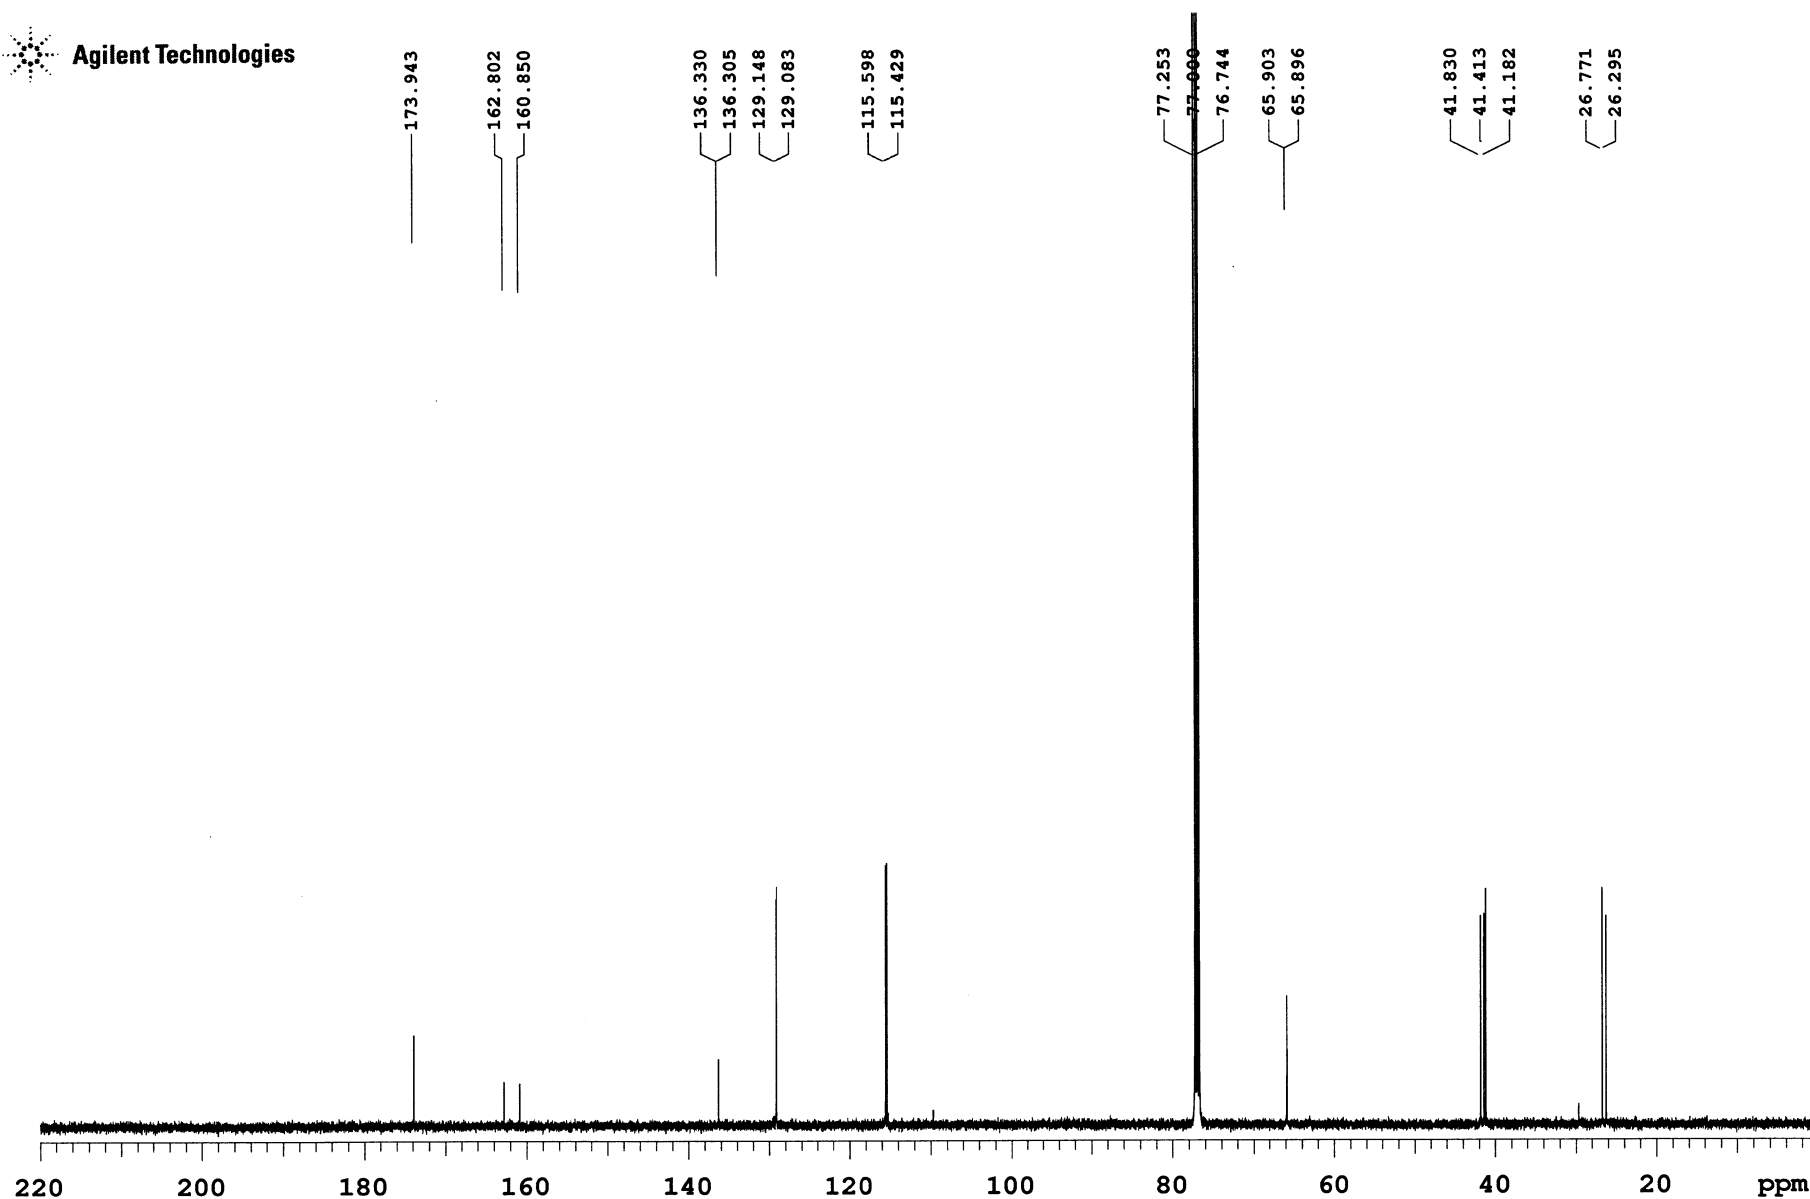Fig S186. <sup>13</sup>C NMR (CDCl<sub>3</sub>, 125 MHz) of compound anti-4b

Sample Name **LCH-02-395**  
Date collected **2015-04-14**Pulse sequence **DEPT**  
Solvent **cdcl3**Temperature **50**  
Spectrometer **—**Study owner **vnmr2**  
Operator **vnmr2**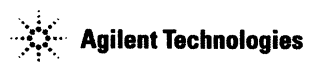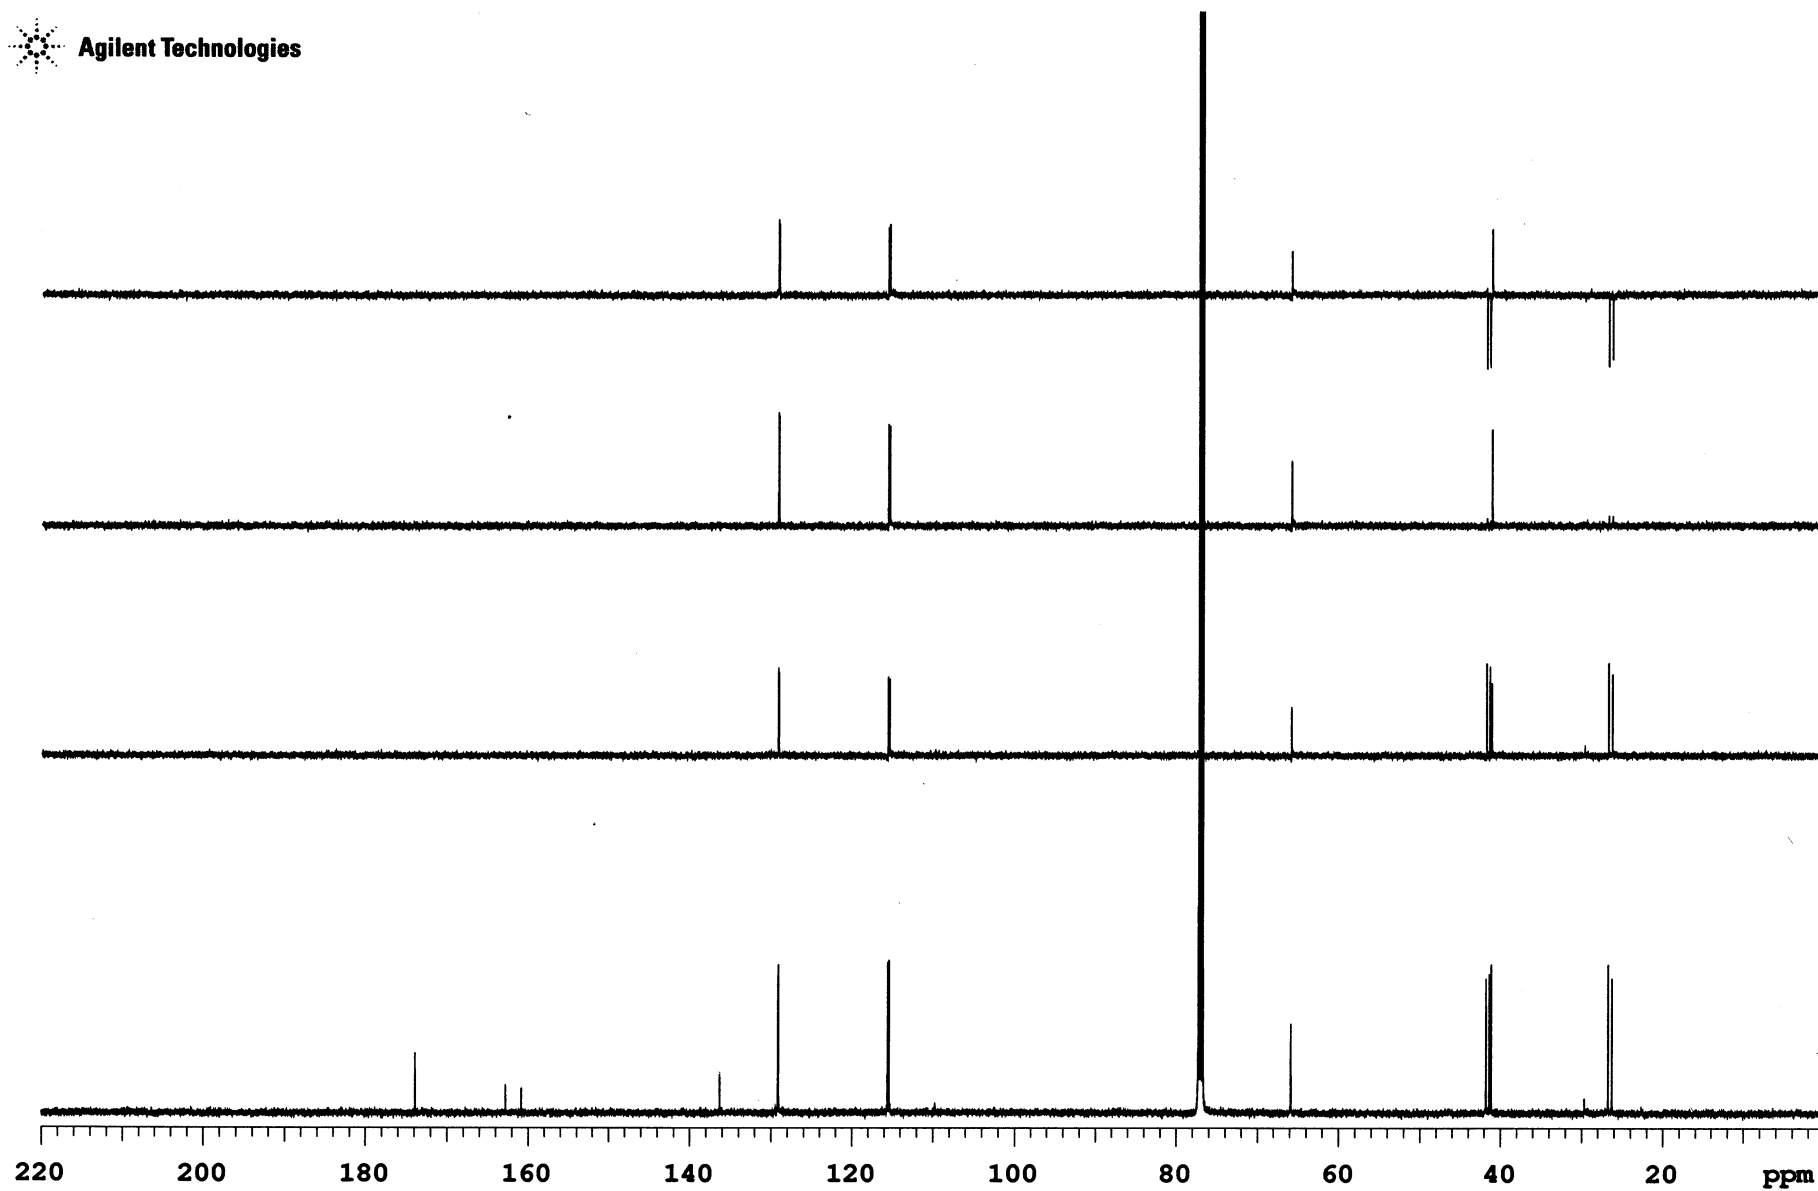

Fig S187. DEPT of compound anti-4b

LCH-02-395

Sample Name LCH-02-395  
Date collected 2015-06-04Pulse sequence gHSQC  
Solvent cdcl3Temperature 25  
Spectrometer Agilent-NMR-inova500Study owner vnmr2  
Operator vnmr2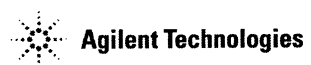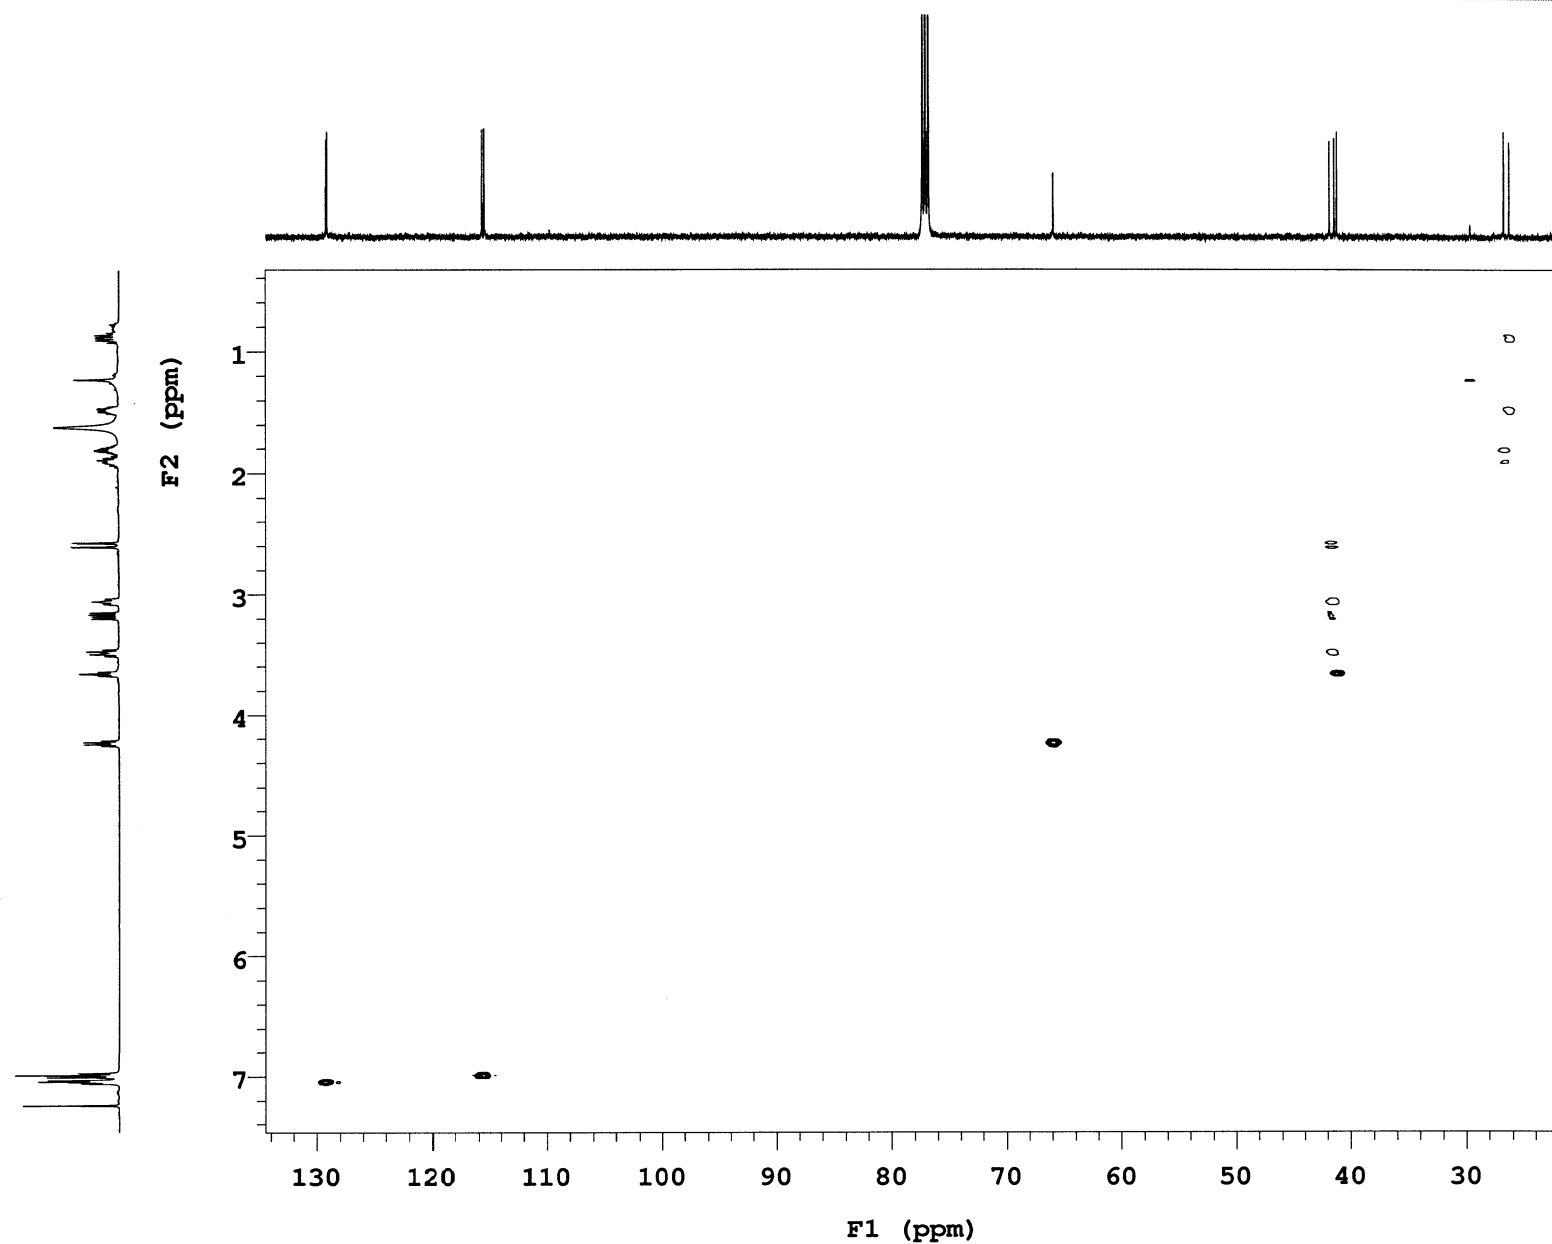

Fig S188. HSQC of compound anti-4b



LCH-02-395

Sample Name **LCH-02-395**  
Date collected **2015-04-14**Pulse sequence **gCOSY**  
Solvent **cdcl3**Temperature **50**  
Spectrometer **—**Study owner **vnmr2**  
Operator **vnmr2**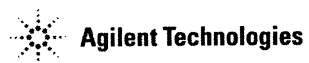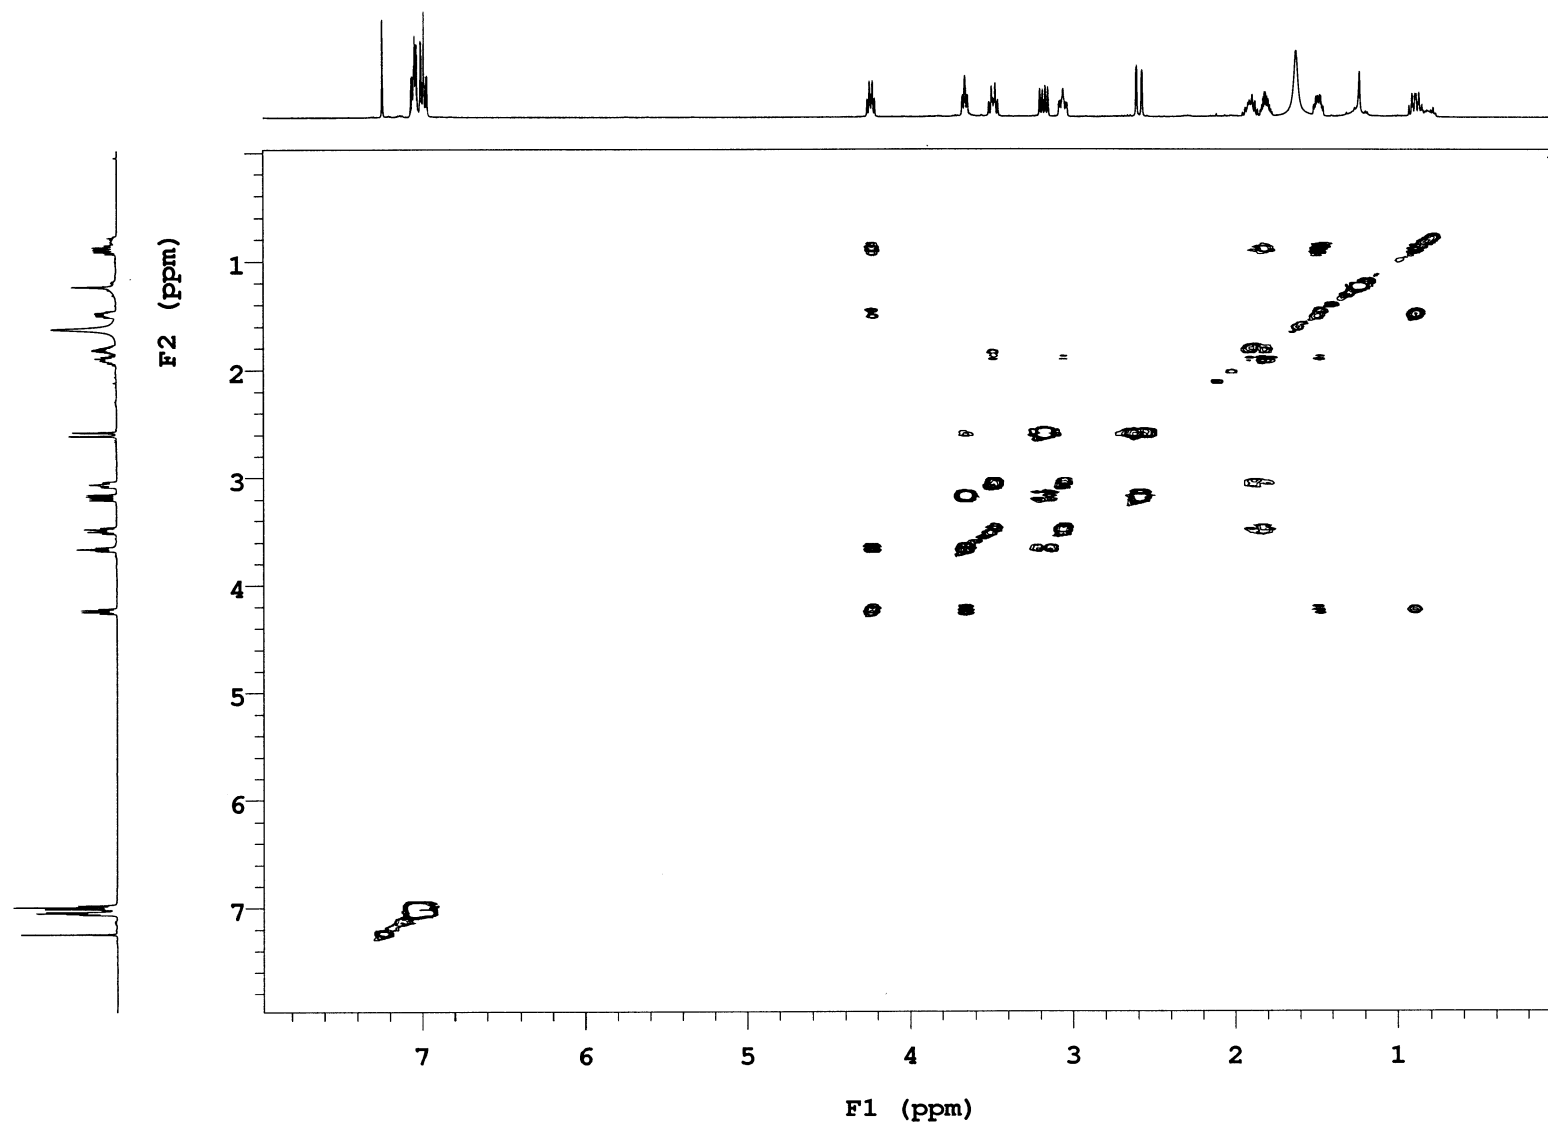

Fig S189. COSY of compound anti-4b

LCH-02-395

Sample Name **LCH-02-395**  
Date collected **2015-06-04**Pulse sequence **NOESY**  
Solvent **cdcl3**Temperature **25**  
Spectrometer **Agilent-NMR-inova500**Study owner **vnmr2**  
Operator **vnmr2**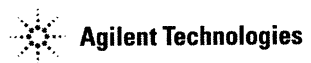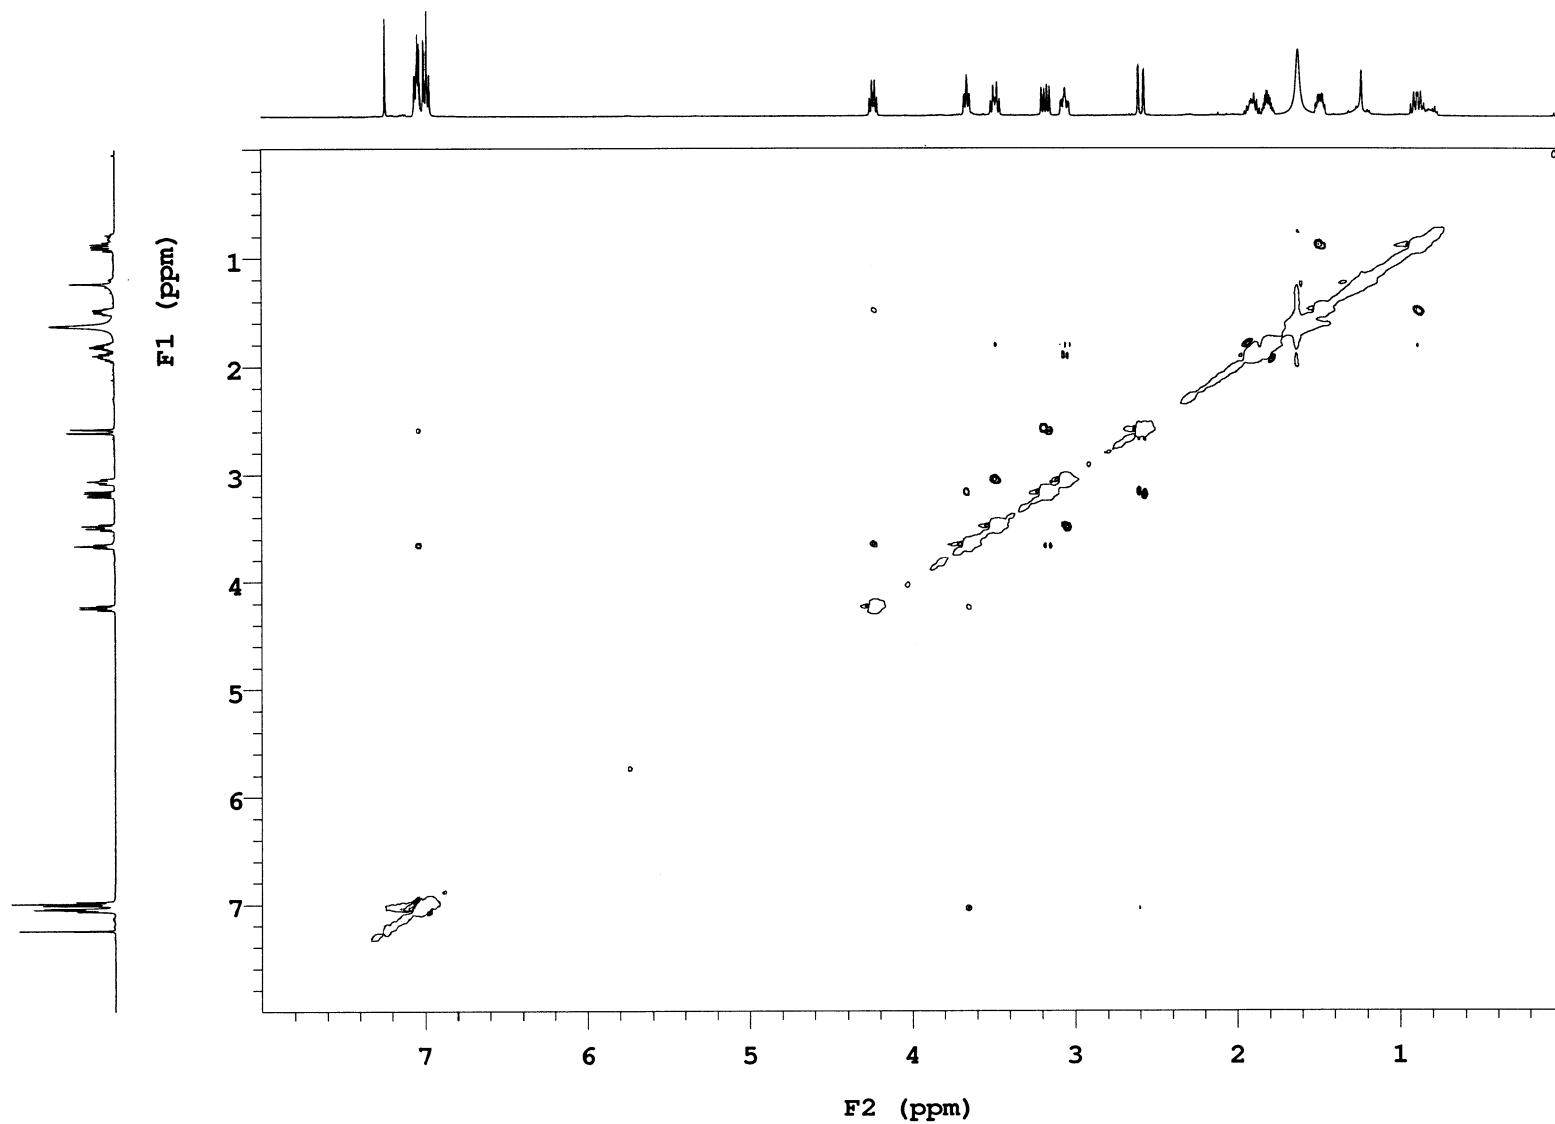

Fig S190. NOESY of compound anti-4b

Fig S191. <sup>1</sup>H NMR (CDCl<sub>3</sub>, 500 MHz) of compound anti-4c

LCH-02-389

exp60 s2pu1

SAMPLE

date Mar 27 2015  
 solvent cdc13  
 file exp  
 ACQUISITION  
 sfrq 499.833  
 tn H1  
 at 3.000  
 np 48000  
 sw 8000.0  
 fb not used  
 bs 4  
 tpwr 62  
 pw 4.8  
 dl 1.000  
 tof 499.7  
 nt 4  
 ct 4  
 alock y  
 gain not used  
 FLAGS  
 il n  
 in n  
 dp y  
 hs nn  
 DISPLAY  
 sp -250.1  
 wp 5748.0  
 vs 66  
 sc 0  
 wc 210  
 hzmm 27.37  
 is 285459.00  
 rfl 4635.7  
 rfp 3618.8  
 th 5  
 ins 100.000  
 nm cdc ph

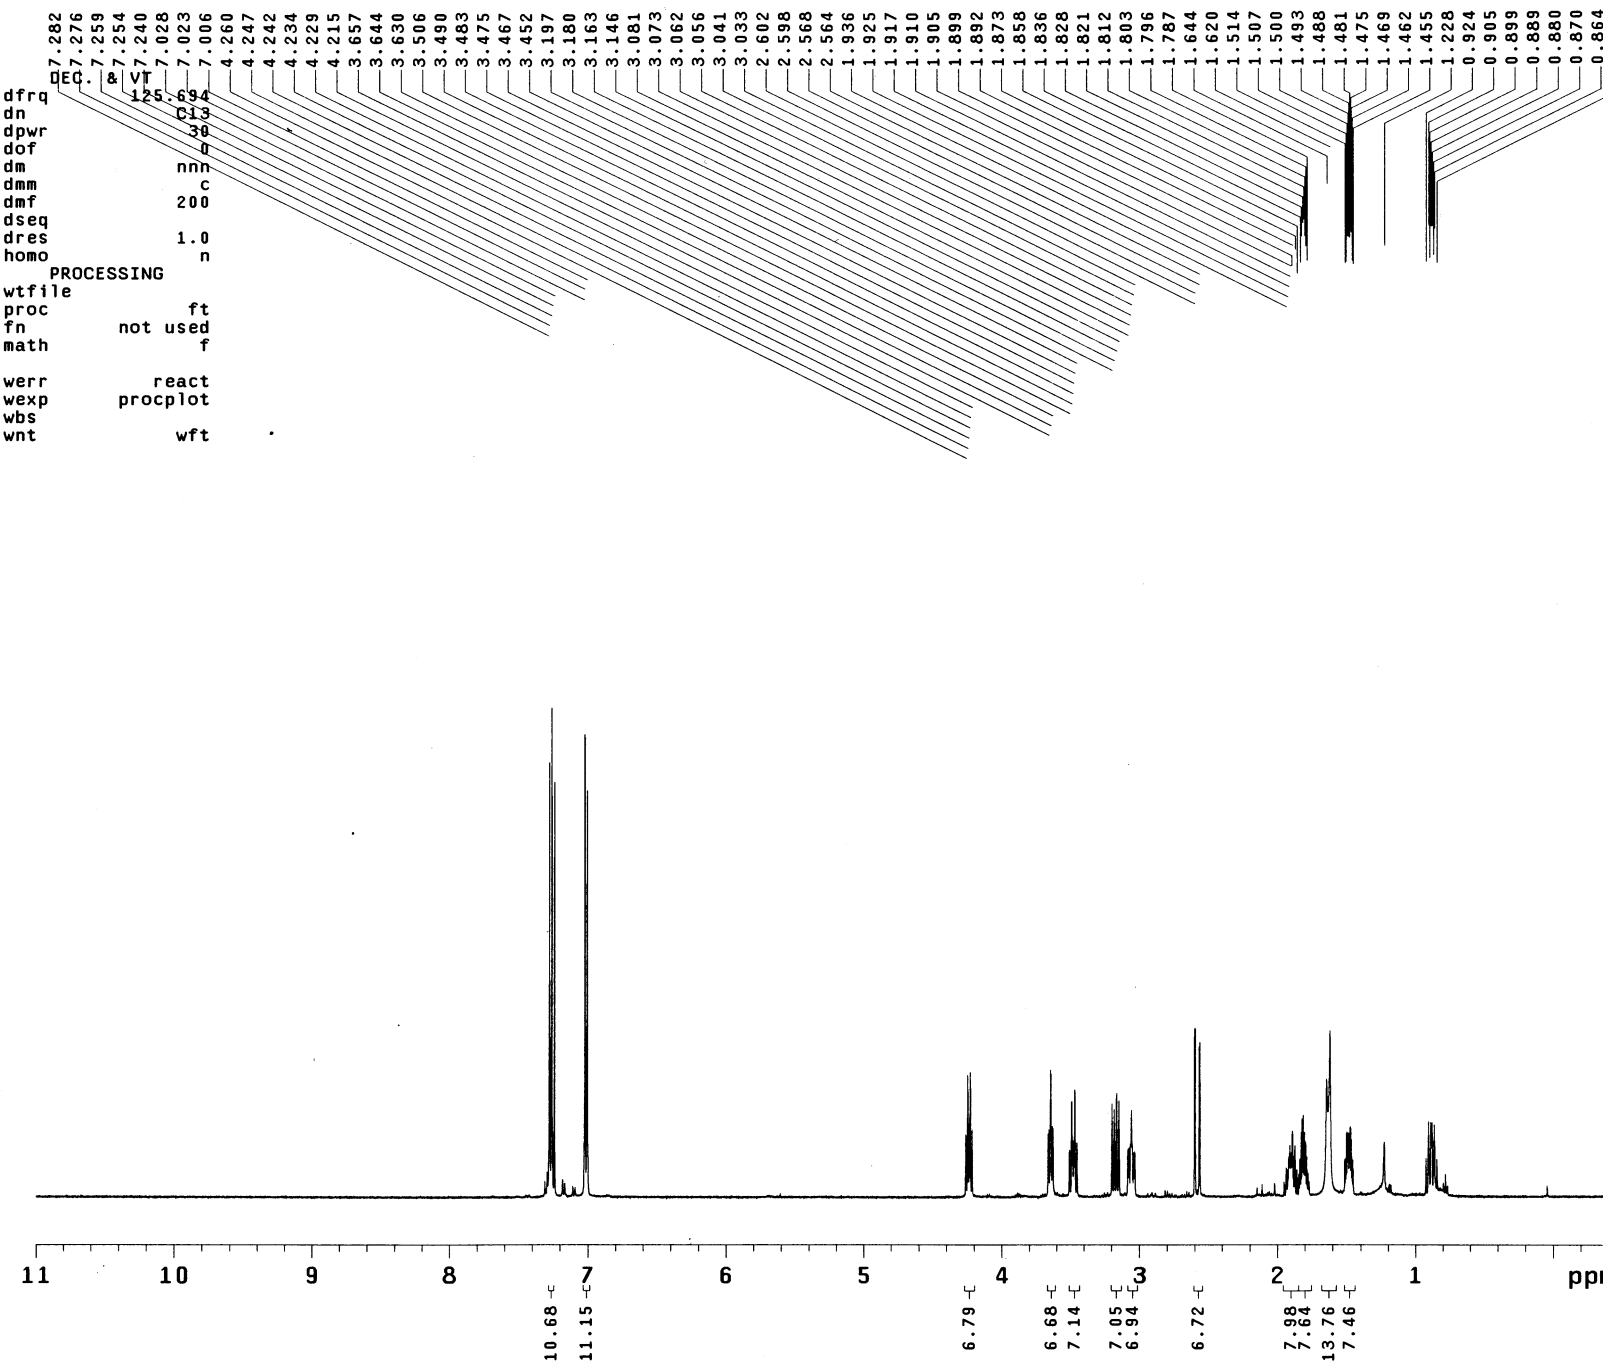

Fig S192. <sup>13</sup>C NMR (CDCl<sub>3</sub>, 125 MHz) of compound anti-4c

LCH-02-389  
exp61 s2pu1

|             |             |            |          |
|-------------|-------------|------------|----------|
| SAMPLE      |             | DEC. & VT  |          |
| date        | Mar 27 2015 | dfrq       | 499.833  |
| solvent     | cdcl3       | dn         | H1       |
| file        | exp         | dpwr       | 44       |
| ACQUISITION |             | do         | 0        |
| sfrq        | 125.696     | dm         | vyv      |
| tn          | C13         | dmm        | w        |
| at          | 1.000       | dmf        | 8868     |
| np          | 60332       | dseq       |          |
| sw          | 30165.9     | dres       | 1.0      |
| fb          | not used    | homo       | n        |
| bs          | 4           | PROCESSING |          |
| tpwr        | 59          | lb         | 1.00     |
| pw          | 4.8         | wtfile     |          |
| d1          | 1.000       | proc       | ft       |
| tof         | 1883.7      | fn         | 131072   |
| nt          | 6000        | math       | f        |
| ct          | 6000        |            |          |
| alock       | y           | werr       | react    |
| gain        | not used    | wexp       | procplot |
| FLAGS       |             | wbs        | testsn   |
| il          | n           | wnt        | wft      |
| in          | n           |            |          |
| dp          | y           |            |          |
| hs          | nn          |            |          |
| DISPLAY     |             |            |          |
| sp          | -0.2        |            |          |
| wp          | 27649.9     |            |          |
| vs          | 327         |            |          |
| sc          | 0           |            |          |
| wc          | 210         |            |          |
| hzmm        | 131.67      |            |          |
| is          | 33.57       |            |          |
| rfl         | 10967.9     |            |          |
| rfp         | 9677.5      |            |          |
| th          | 5           |            |          |
| ins         | 100.000     |            |          |
| nm          | cdc ph      |            |          |

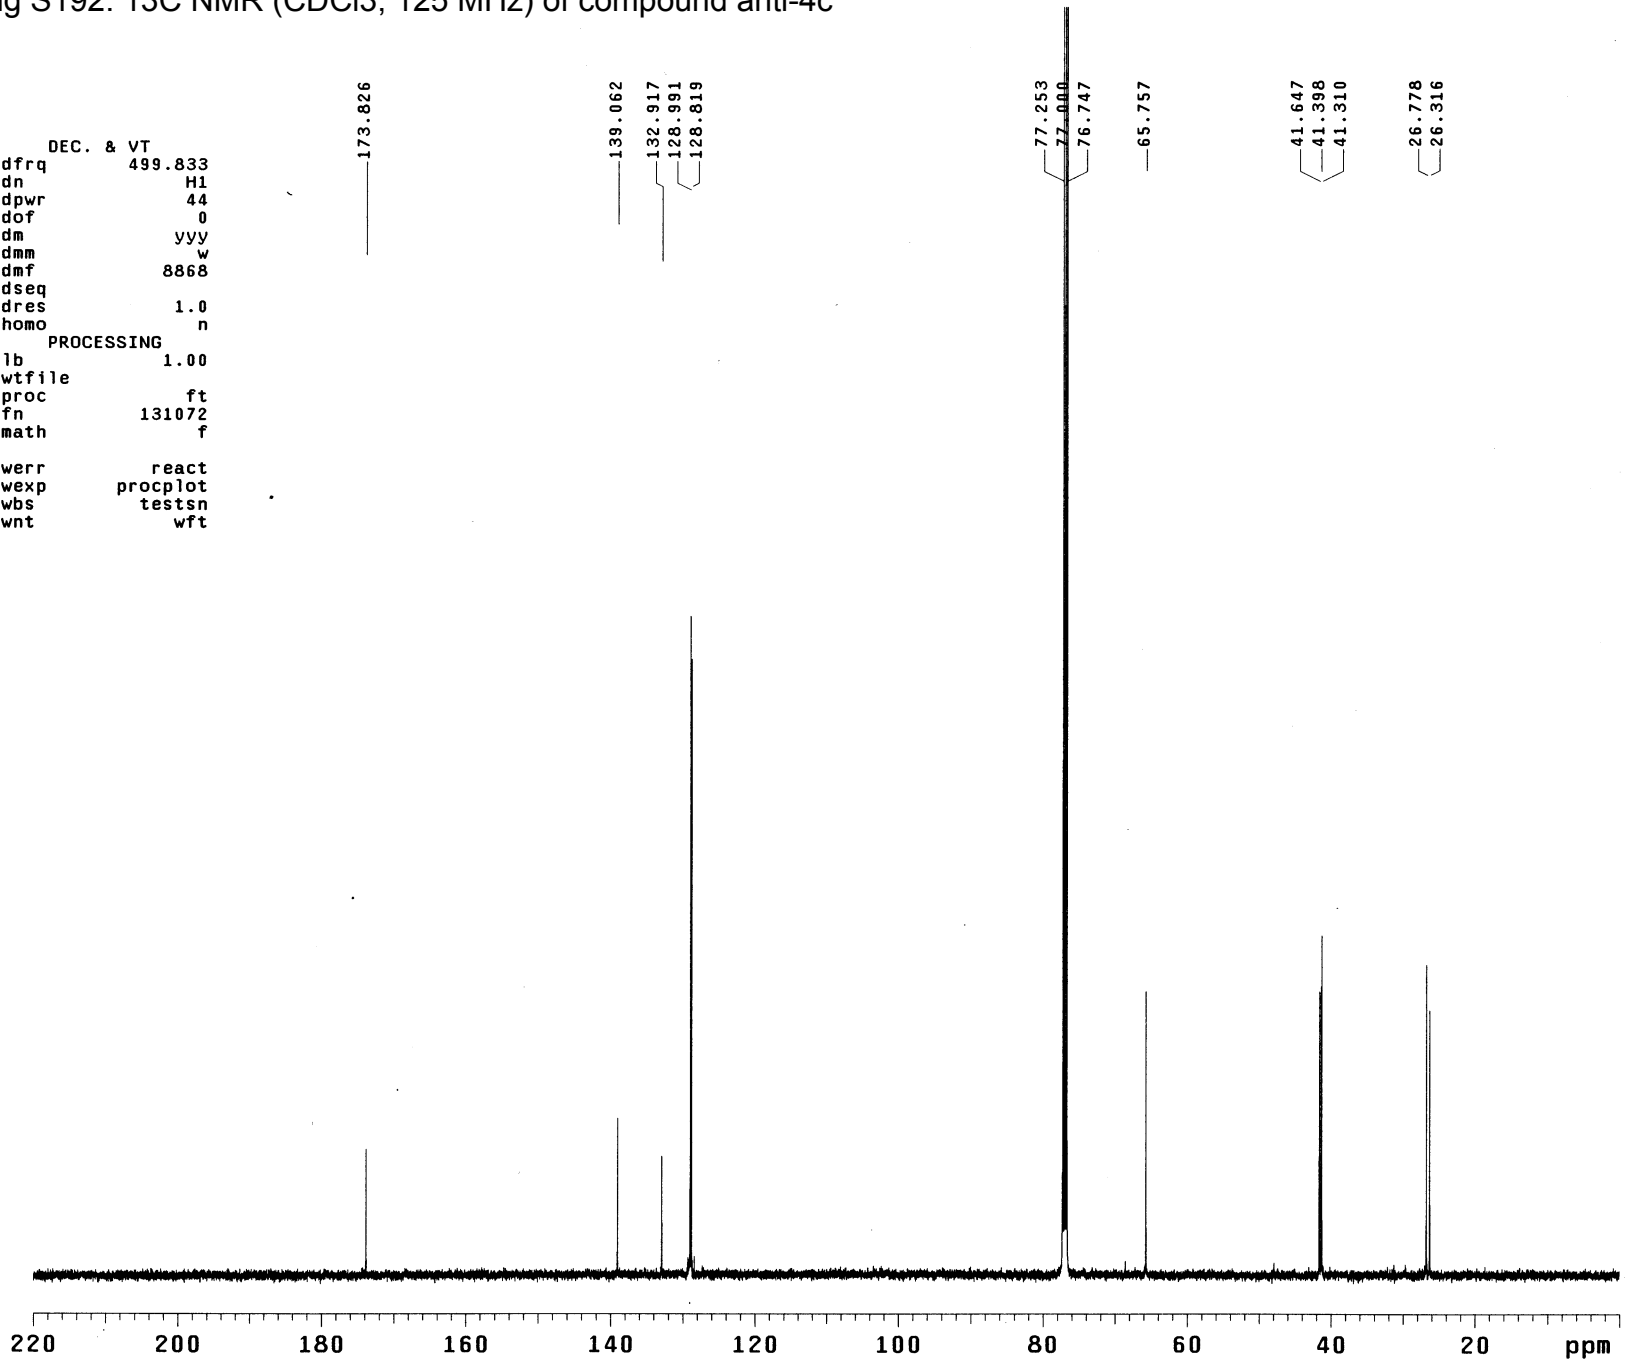

Fig S193. DEPT of compound anti-4c

LCH-02-389

exp62 DEPT

|             |             |               |             |        |
|-------------|-------------|---------------|-------------|--------|
| SAMPLE      |             | DEPT          | ACQUISITION | ARRAYS |
| date        | Mar 27 2015 | j1xh 140.0    | array       | mult   |
| solvent     | cdc13       | mult arrayed  | arraydim    | 3      |
| sample      | undefined   | SPECIAL       |             |        |
| ACQUISITION |             | temp not used | i           | mult   |
| sw          | 30165.9     | gain 34       | 1           | 0.5    |
| at          | 1.000       | spin 0        | 2           | 1      |
| np          | 60332       | PROCESSING    | 3           | 1.5    |
| bs          | 4           | lb 1.00       |             |        |
| ss          | -4          | fn 131072     |             |        |
| d1          | 1.000       | SPECTRUM      |             |        |
| nt          | 3000        | wp 27649.9    |             |        |
| ct          | 3000        | sp -0.2       |             |        |
| TRANSMITTER |             | rp 119.4      |             |        |
| tn          | C13         | lp 224.5      |             |        |
| tof         | 1883.7      | ai cdc ph     |             |        |
| tpwr        | 59          | REFERENCE     |             |        |
| pw          | 14.700      | rfl 1290.4    |             |        |
| DECOUPLER   |             | rfl 0         |             |        |
| dn          | H1          | PLOT          |             |        |
| dof         | 0           | wc 210        |             |        |
| dpwr        | 44          | sc 0          |             |        |
| dm          | nny         | vs 800        |             |        |
| dmm         | ccw         | hzmm 131.67   |             |        |
| dmf         | 8868        | th 7          |             |        |
| pp1v1       | 59          |               |             |        |
| pp          | 21.200      |               |             |        |

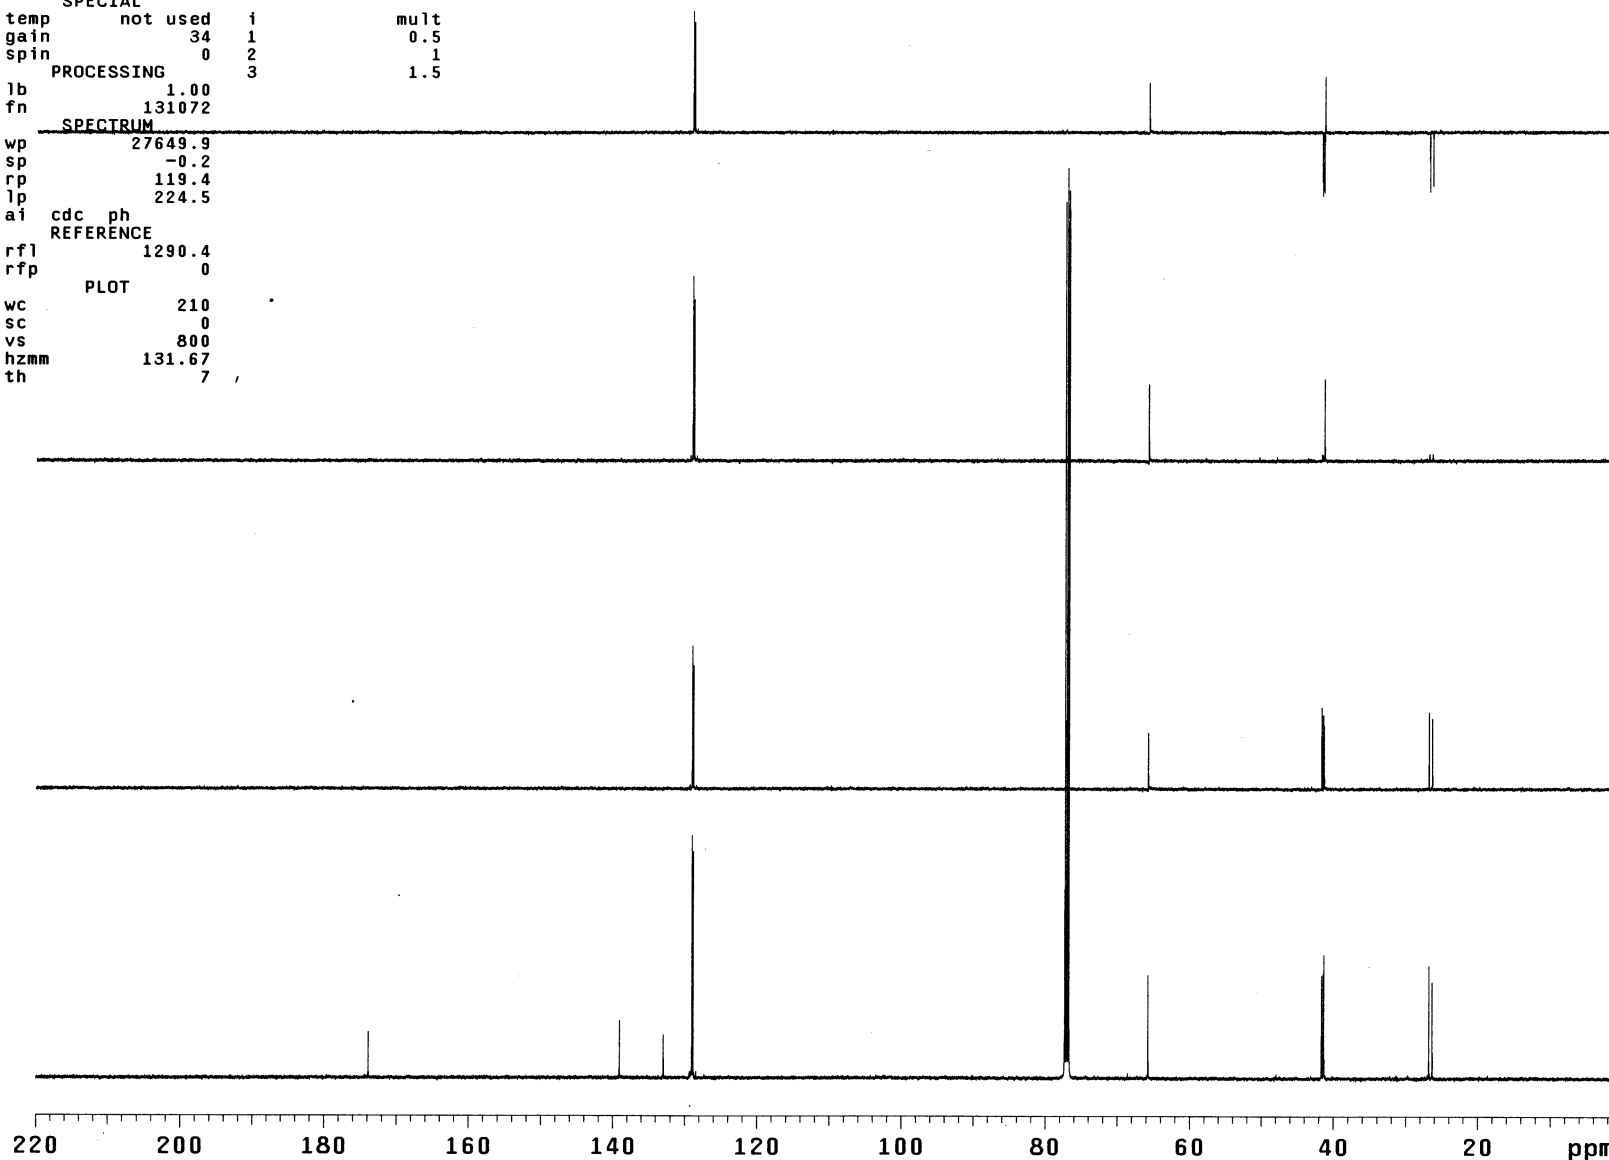

Fig S194. HSQC of compound anti-4c

LCH-02-389

exp65 gHSQC

| SAMPLE         |             | FLAGS         | ACQUISITION | ARRAYS   |
|----------------|-------------|---------------|-------------|----------|
| date           | Mar 27 2015 | hs            | n           | array    |
| solvent        | cdc13       | sspul         | y           | arraydim |
| sample         | undefined   | PFGflg        | y           | phase    |
| ACQUISITION    | hsglv1      | 1004          | i           | phase    |
| sw             | 4001.6      | SPECIAL       | 1           | 1        |
| at             | 0.128       | temp          | not used    | 2        |
| np             | 1024        | gain          | 54          |          |
| fb             | not used    | spin          | 0           |          |
| ss             | 32          | GRADIENTS     |             |          |
| d1             | 1.000       | gzlv11        | 1004        |          |
| nt             | 8           | gt1           | 0.002000    |          |
| 2D ACQUISITION | gzlv13      | 505           |             |          |
| sw1            | 21367.5     | gt3           | 0.001000    |          |
| n1             | 128         | gstab         | 0.000500    |          |
| phase          | arrayed     | F2 PROCESSING |             |          |
| TRANSMITTER    | gf          | 0.059         |             |          |
| tn             | H1          | gfs           | not used    |          |
| sfrq           | 499.832     | fn            | 1024        |          |
| tof            | -499.9      | F1 PROCESSING |             |          |
| tpwr           | 62          | gf1           | 0.006       |          |
| pw             | 13.800      | gfs1          | not used    |          |
| DECOUPLER      | proc1       | lp            |             |          |
| dn             | C13         | fn1           | 2048        |          |
| dof            | -2515.1     | DISPLAY       |             |          |
| dm             | nny         | sp            | 638.2       |          |
| dmm            | ccp         | wp            | 3134.1      |          |
| dmf            | 32258       | sp1           | 3016.5      |          |
| dpwr           | 43          | wp1           | 13730.3     |          |
| pxlv1          | 61          | rfl           | 2134.6      |          |
| pxx            | 11.000      | rfl           | 2116.3      |          |
| HSQC           | rfl1        | 9546.5        |             |          |
| j1xh           | 140.0       | rfl1          | 8264.5      |          |
| nullflg        | y           | PLOT          |             |          |
| mult           | 2           | wc            | 150.0       |          |
|                |             | sc            | 6.2         |          |
|                |             | wc2           | 116.2       |          |
|                |             | sc2           | 0           |          |
|                |             | vs            | 37          |          |
|                |             | th            | 6           |          |
|                |             | ai            | cdc         | ph       |

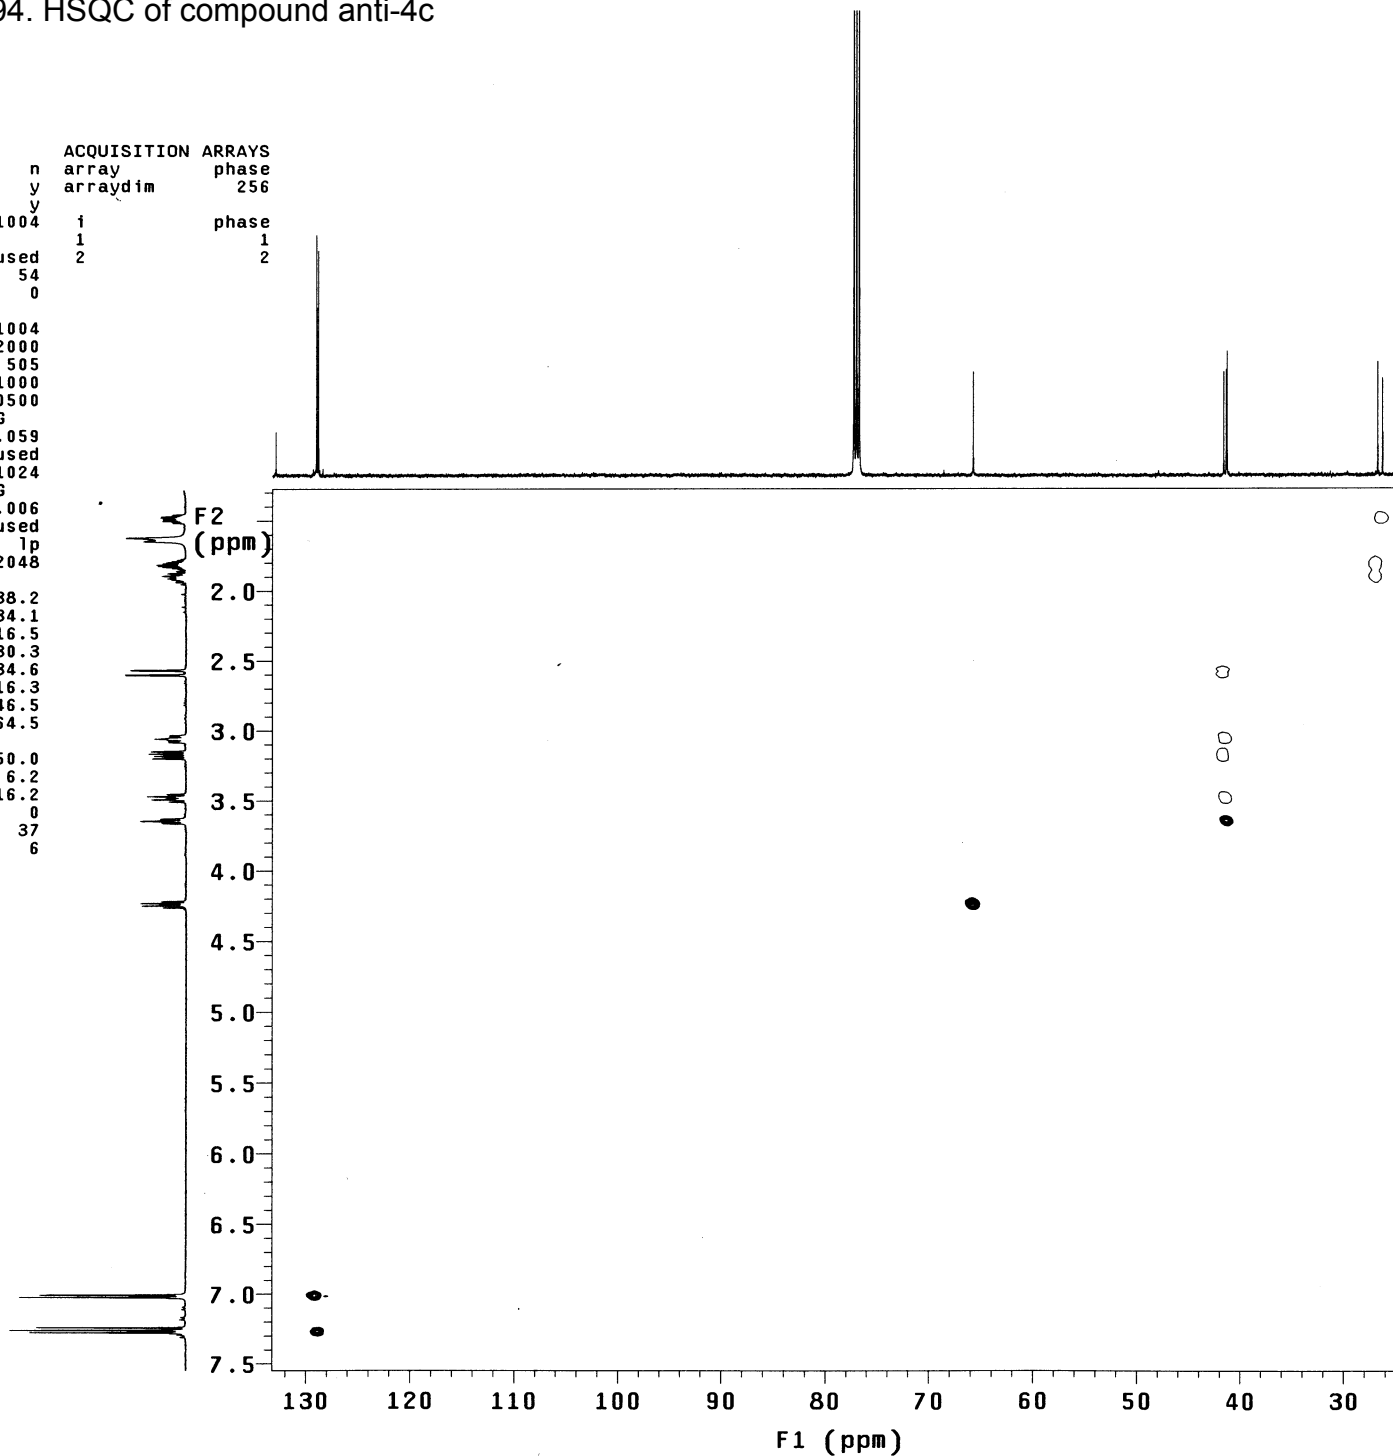

LCH-02-389

exp63 gCOSY

| SAMPLE         |             | FLAGS         |          |
|----------------|-------------|---------------|----------|
| date           | Mar 27 2015 | hs            | nn       |
| solvent        | cdcl3       | sspu1         | n        |
| sample         | undefined   | hsglv1        | 1004     |
| ACQUISITION    |             | SPECIAL       |          |
| sw             | 4001.6      | temp          | not used |
| at             | 0.128       | gain          | 34       |
| np             | 1024        | spin          | 0        |
| fb             | not used    | F2 PROCESSING |          |
| ss             | 16          | sb            | -0.064   |
| d1             | 1.000       | sbs           | not used |
| nt             | 8           | fn            | 1024     |
| 2D ACQUISITION |             | F1 PROCESSING |          |
| sw1            | 4001.6      | sb1           | -0.032   |
| ni             | 128         | sbs1          | not used |
| TRANSMITTER    |             | proc1         |          |
| tn             | H1          | fn1           | 1024     |
| sfrq           | 499.832     | DISPLAY       |          |
| tof            | -499.9      | sp            | 309.2    |
| tpwr           | 62          | wp            | 3392.0   |
| pw             | 13.800      | sp1           | 315.5    |
| GRADIENTS      |             | wp1           | 3392.0   |
| gzlv11         | 1004        | rfl           | 2141.8   |
| gt1            | 0.001000    | rff           | 2122.8   |
| gstab          | 0.000500    | rfl1          | 2143.3   |
| DECOUPLER      |             | rff1          | 2122.8   |
| dn             | C13         | PLOT          |          |
| dm             | nnn         | wc            | 155.0    |
|                |             | sc            | 10.0     |
|                |             | wc2           | 155.0    |
|                |             | sc2           | 0        |
|                |             | vs            | 37       |
|                |             | th            | 9        |
|                |             | ai            | cdc av   |

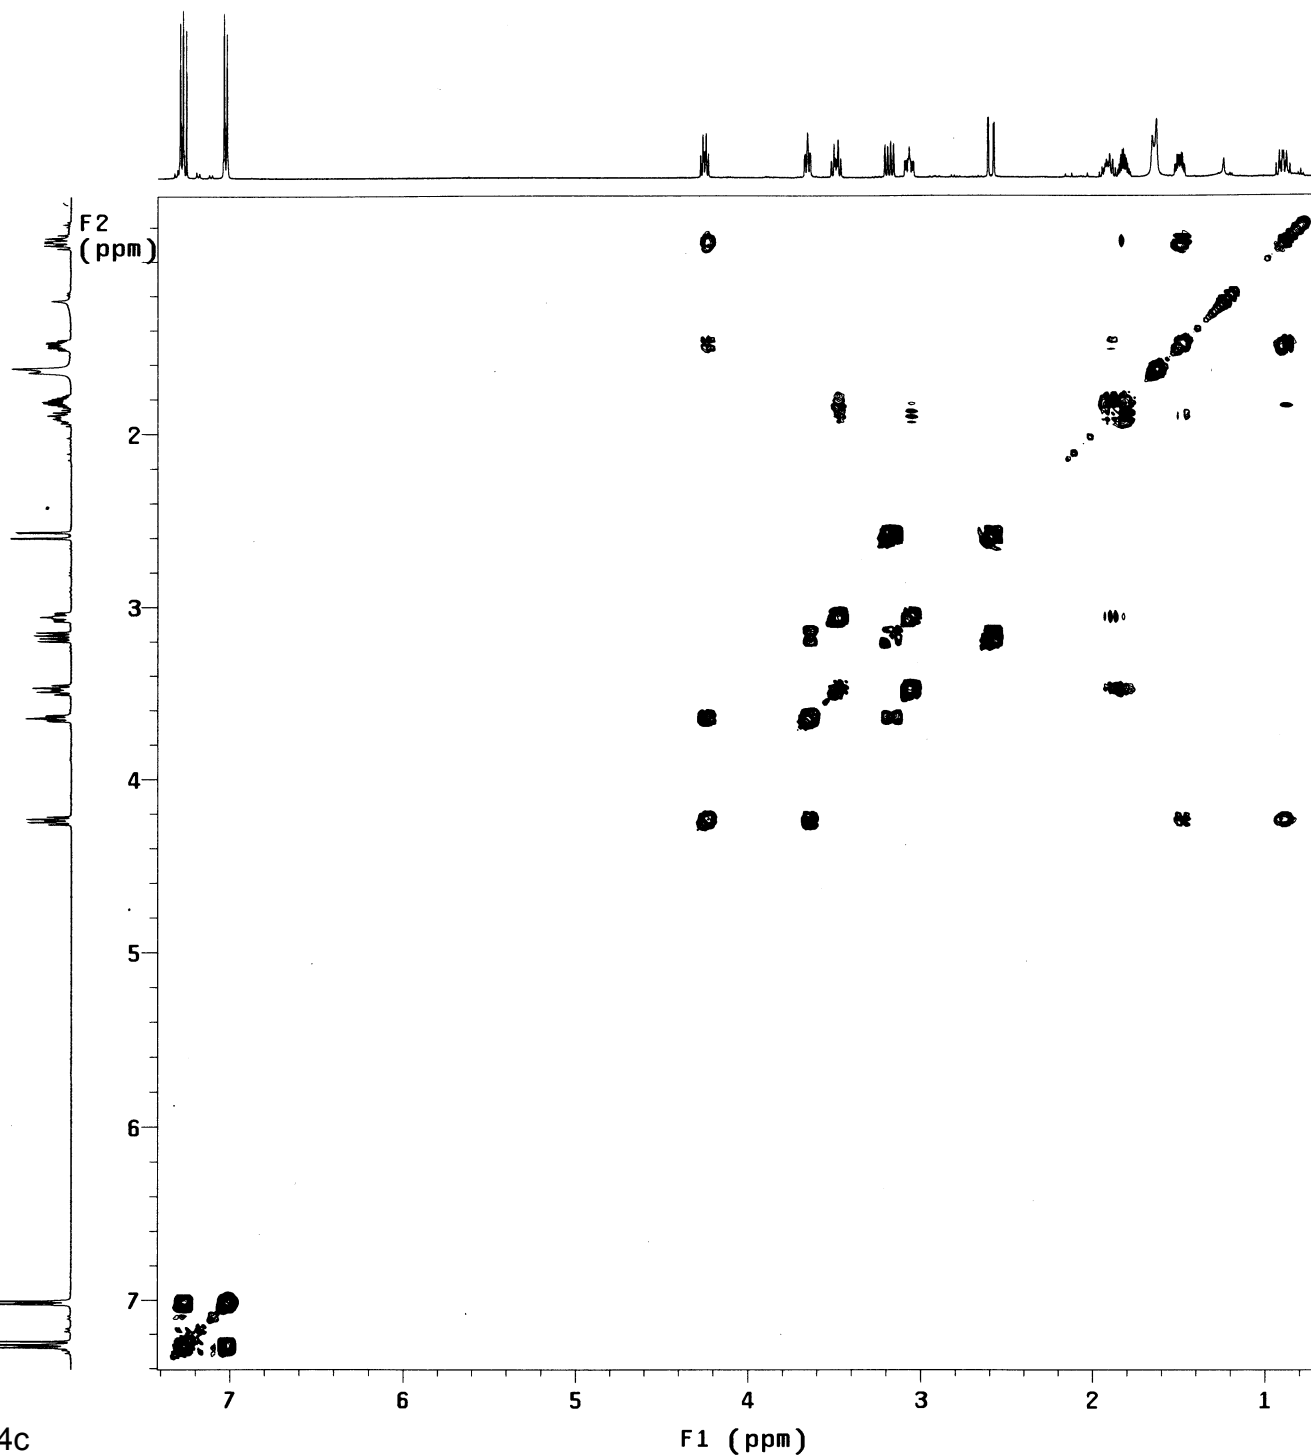

Fig S195. COSY of compound anti-4c

LCH-02-389

exp64 NOESY

| SAMPLE         |             | FLAGS         |          |
|----------------|-------------|---------------|----------|
| date           | Mar 27 2015 | hs            | n        |
| solvent        | cdcl3       | sspul         | y        |
| sample         | undefined   | PFGflg        | y        |
| ACQUISITION    |             | hsglv1        | 1004     |
| sw             | 4001.6      | SPECIAL       |          |
| at             | 0.128       | temp          | not used |
| np             | 1024        | gain          | 34       |
| fb             | not used    | spin          | 0        |
| ss             | 32          | F2 PROCESSING |          |
| d1             | 1.000       | gf            | 0.059    |
| nt             | 16          | gfs           | not used |
| 2D ACQUISITION |             | fn            | 1024     |
| sw1            | 4001.6      | F1 PROCESSING |          |
| ni             | 200         | gf1           | 0.046    |
| TRANSMITTER    |             | gfs1          | not used |
| tn             | H1          | procl         | lp       |
| sfrq           | 499.832     | fn1           | 1024     |
| tof            | -499.9      | DISPLAY       |          |
| tpwr           | 62          | sp            | 322.1    |
| pw             | 13.800      | wp            | 3446.7   |
| NOESY          |             | sp1           | 328.6    |
| mix            | 0.600       | wp1           | 3438.9   |
| PRESATURATION  |             | rfl           | 2134.3   |
| satmode        | nnnn        | rfl1          | 2120.3   |
| satpwr         | 0           | rfl11         | 2135.6   |
| satdly         | 0           | rflp1         | 2120.3   |
| satfrq         | 0           | PLOT          |          |
| DECOUPLER      |             | wc            | 155.0    |
| dn             | C13         | sc            | 10.0     |
| dm             | nnn         | wc2           | 155.0    |
|                |             | sc2           | 0        |
|                |             | vs            | 37       |
|                |             | th            | 2        |
|                |             | ai            | ph       |

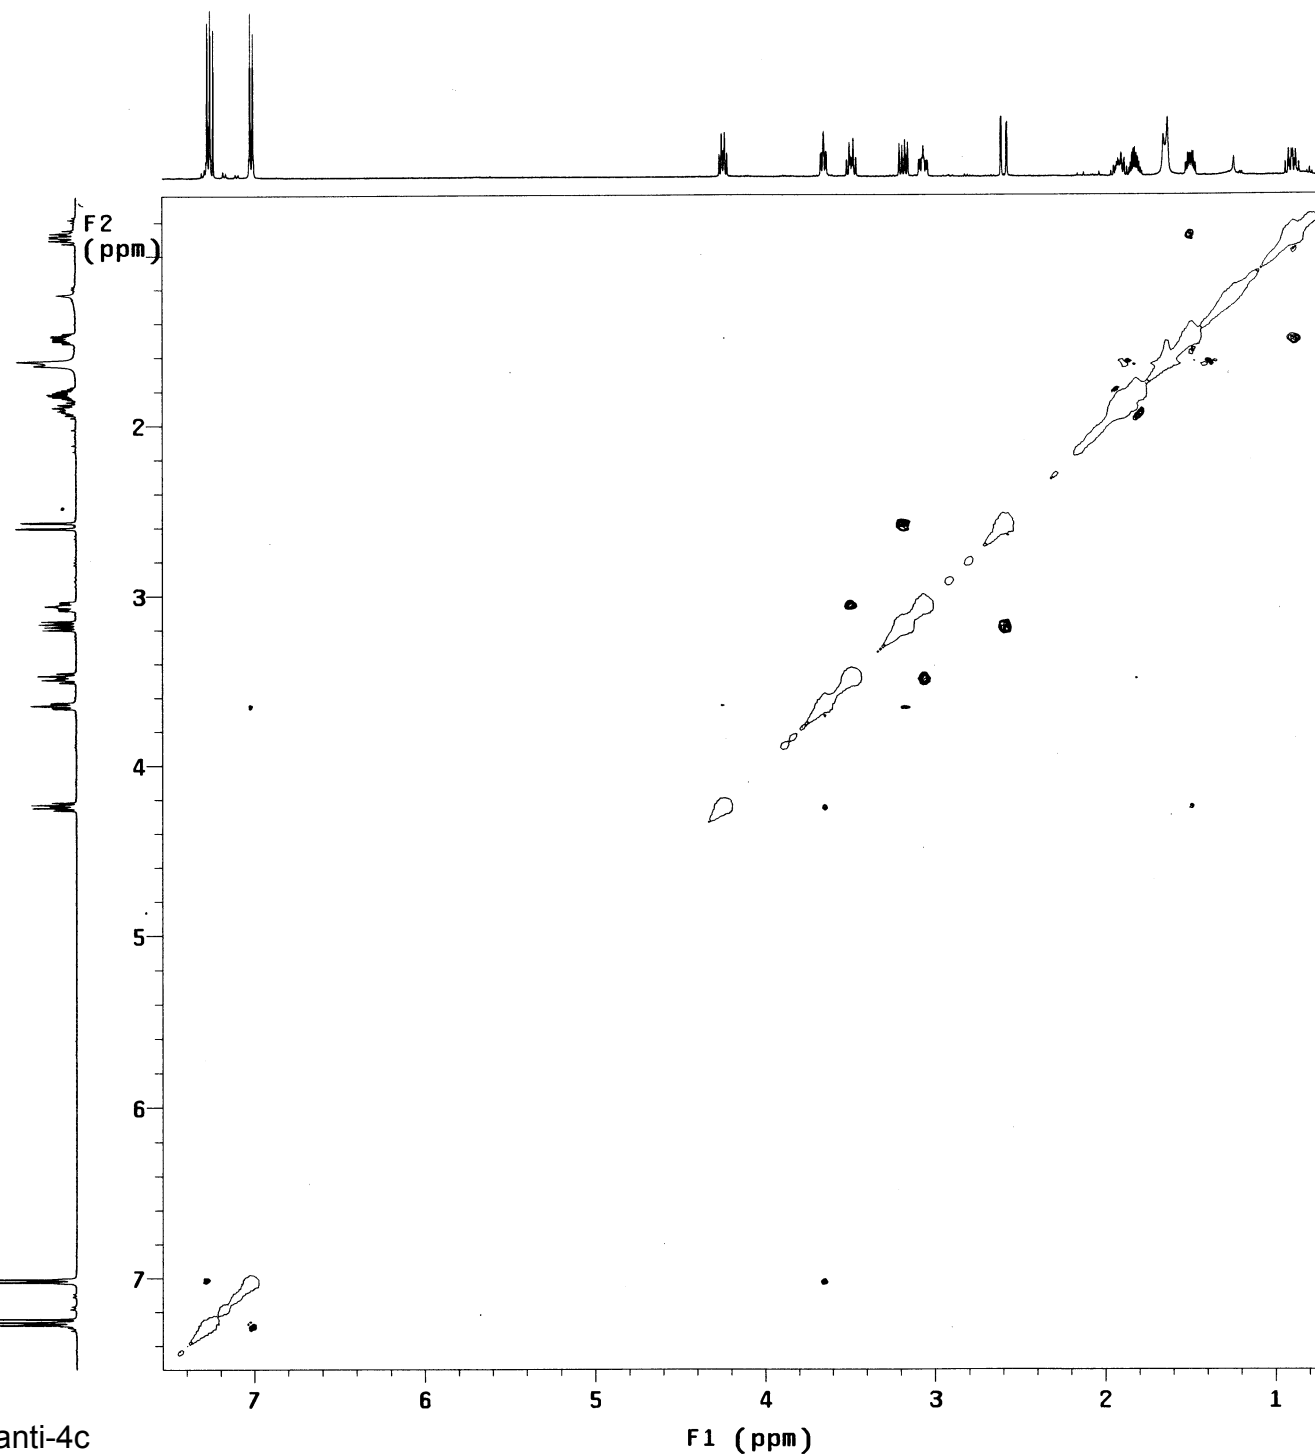

Fig S196. NOESY of compound anti-4c



Fig S197. 1H NMR (CDCl3, 500 MHz) of compound anti-4d

LCH-02-356-P2

exp71 s2pu1

SAMPLE

date Jan 11 2015

solvent cdc13

file exp

ACQUISITION

sfrq 499.833

tn H1

at 3.000

np 48000

sw 8000.0

fb not used

bs 4

tpwr 62

pw 4.8

d1 1.000

tof 499.7

nt 4

ct 4

alock not used

gain not used

FLAGS

il n

in n

dp y

hs nn

DISPLAY

sp -0.1

wp 5997.8

vs 70

sc 0

wc 210

hzmm 28.56

is 0.00

rfl 4636.2

rpf 3618.8

th 3

ins 100.000

nm cdc ph

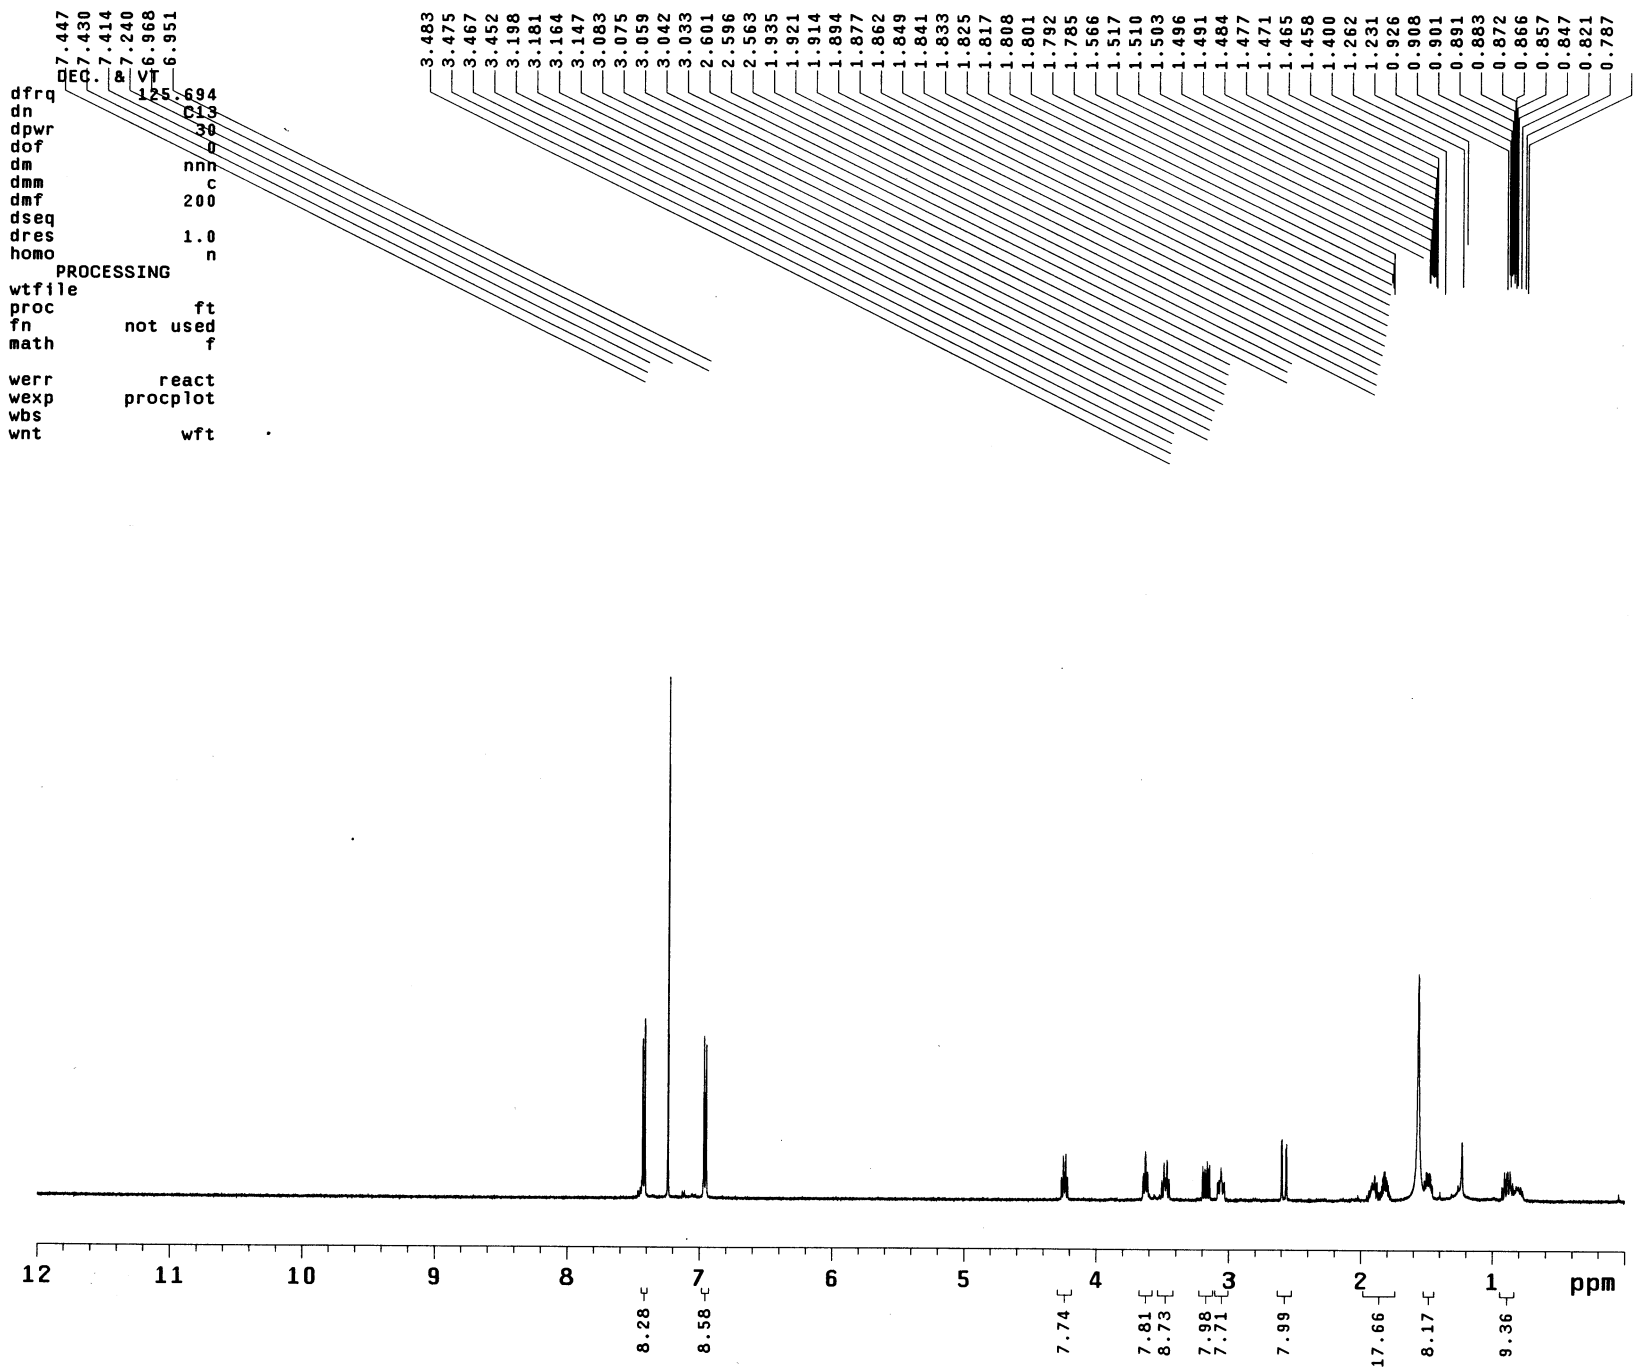

Fig S198. <sup>13</sup>C NMR (CDCl<sub>3</sub>, 125 MHz) of compound anti-4d

LCH-02-356-P2

exp72 s2pu1

| SAMPLE      |             | DEC. & VT  |          |
|-------------|-------------|------------|----------|
| date        | Jan 11 2015 | dfrq       | 499.833  |
| solvent     | cdc13       | dn         | H1       |
| file        | exp         | dpwr       | 44       |
| ACQUISITION |             | dof        | 0        |
| sfrq        | 125.696     | dm         | yyy      |
| tn          | C13         | dmm        | w        |
| at          | 1.000       | dmf        | 8868     |
| np          | 60332       | dseq       |          |
| sw          | 30165.9     | dres       | 1.0      |
| fb          | not used    | homo       | n        |
| bs          | 4           | PROCESSING |          |
| tpwr        | 59          | lb         | 1.00     |
| pw          | 4.8         | wtfile     |          |
| d1          | 1.000       | proc       | ft       |
| tof         | 1883.7      | fn         | 131072   |
| nt          | 4000        | math       | f        |
| ct          | 4000        |            |          |
| alock       | y           | werr       | react    |
| gain        | not used    | wexp       | procplot |
| FLAGS       |             | wbs        | testsn   |
| il          | n           | wnt        | wft      |
| in          | n           |            |          |
| dp          | y           |            |          |
| hs          | nn          |            |          |
| DISPLAY     |             |            |          |
| sp          | -1257.2     |            |          |
| wp          | 28906.5     |            |          |
| vs          | 800         |            |          |
| sc          | 0           |            |          |
| wc          | 210         |            |          |
| hzmm        | 137.65      |            |          |
| is          | 33.57       |            |          |
| rfl         | 10967.5     |            |          |
| rfp         | 9677.5      |            |          |
| th          | 7           |            |          |
| ins         | 100.000     |            |          |
| nm          | cdc ph      |            |          |

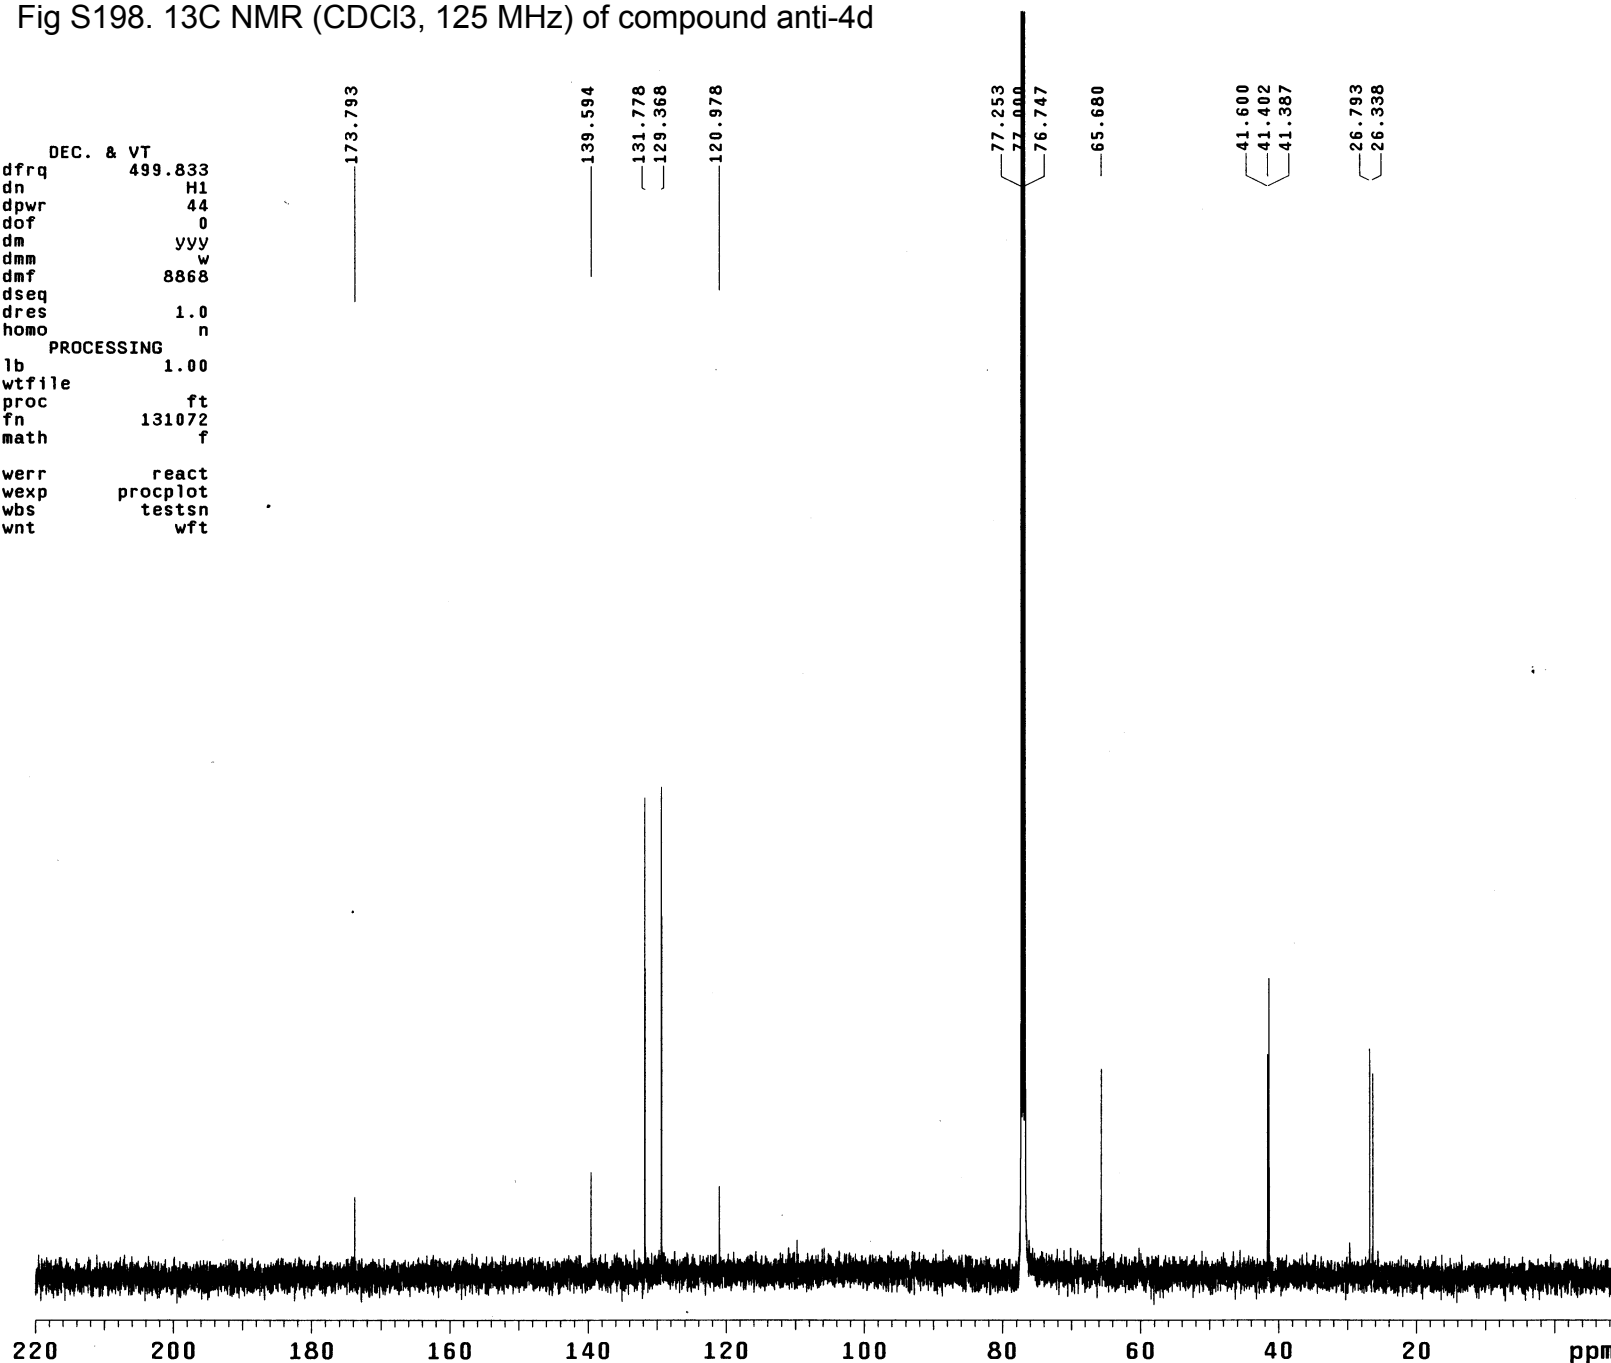

Fig S199. DEPT of compound anti-4d

LCH-02-356-P2

exp73 DEPT

| SAMPLE      |             | DEPT            | ACQUISITION | ARRAYS |
|-------------|-------------|-----------------|-------------|--------|
| date        | Jan 11 2015 | j1xh mult 140.0 | array       | mult 3 |
| solvent     | cdc13       | mult arrayed    | arraydim    |        |
| sample      | undefined   | SPECIAL         |             |        |
| ACQUISITION |             | temp not used   | i           | mult   |
| sw          | 30165.9     | gain 34         | 1           | 0.5    |
| at          | 1.000       | spin 0          | 2           | 1      |
| np          | 60332       | PROCESSING      | 3           | 1.5    |
| bs          | 4           | lb 1.00         |             |        |
| ss          | -4          | fn 131072       |             |        |
| d1          | 1.000       | SPECTRUM        |             |        |
| nt          | 2000        | wp 28906.5      |             |        |
| ct          | 2000        | sp -1257.2      |             |        |
| TRANSMITTER |             | rp 180.0        |             |        |
| tn          | C13         | lp 258.0        |             |        |
| tof         | 1883.7      | ai cdc ph       |             |        |
| tpwr        | 59          | REFERENCE       |             |        |
| pw          | 14.700      | rfl 1290.4      |             |        |
| DECOUPLER   |             | rfp 0           |             |        |
| dn          | H1          | PLOT            |             |        |
| dof         | 0           | wc 210          |             |        |
| dpwr        | 44          | sc 0            |             |        |
| dm          | nny         | vs 3500         |             |        |
| dmm         | ccw         | hzmm 137.65     |             |        |
| dmf         | 8868        | th 7            |             |        |
| pplv1       | 59          |                 |             |        |
| pp          | 21.200      |                 |             |        |

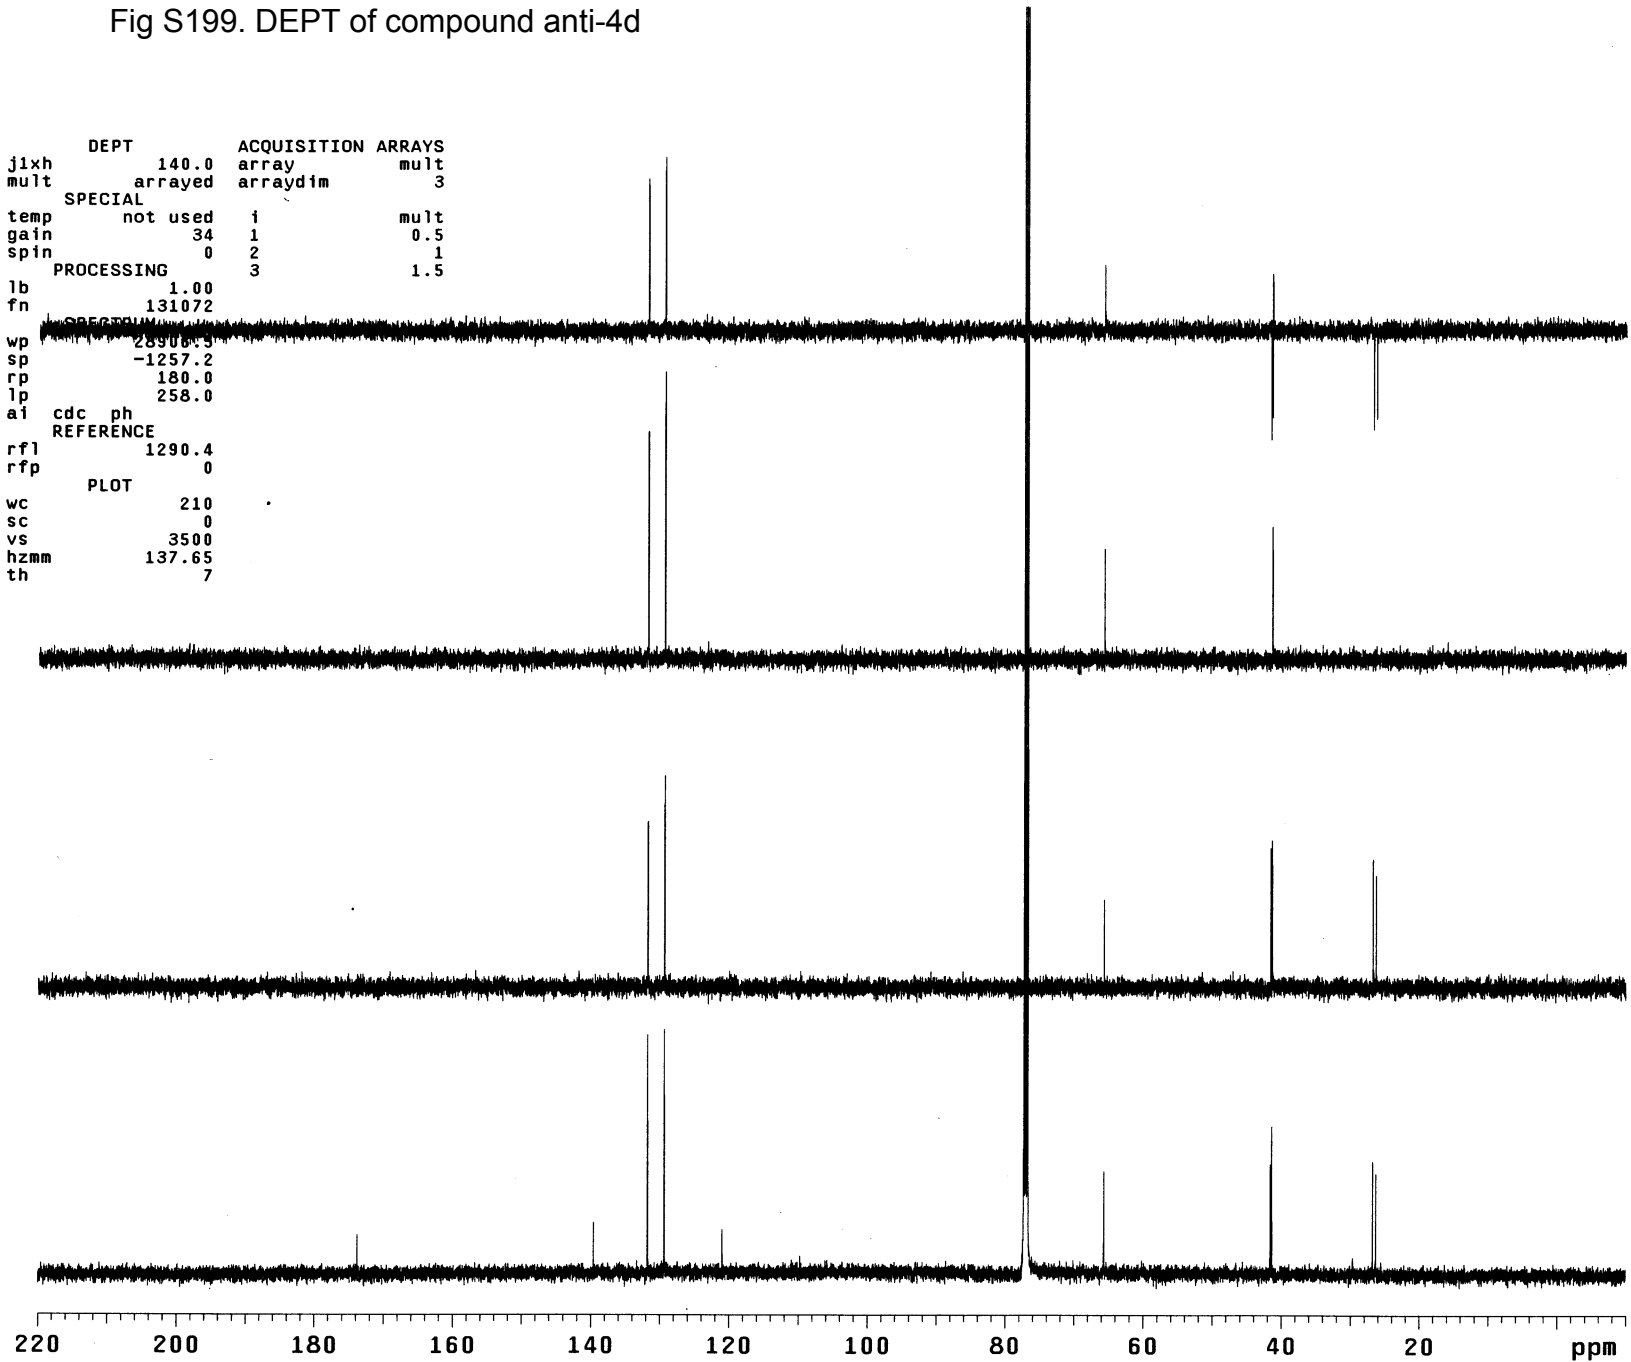

Fig S200. HSQC of compound anti-4d

LCH-02-356-P2

exp76 gHSQC

| SAMPLE         |             | FLAGS         | ACQUISITION | ARRAYS   |
|----------------|-------------|---------------|-------------|----------|
| date           | Jan 11 2015 | hs            | n           | array    |
| solvent        | cdcl3       | sspul         | y           | arraydim |
| sample         | undefined   | PFgflg        | y           | 256      |
| ACQUISITION    |             | hsglv1        | 1004        | 1        |
| sw             | 4001.6      | SPECIAL       | 1           | phase    |
| at             | 0.128       | temp          | not used    | 1        |
| np             | 1024        | gain          | 54          | 2        |
| fb             | not used    | spin          | 0           |          |
| ss             | 32          | GRADIENTS     |             |          |
| d1             | 1.000       | gzlv11        | 1004        |          |
| nt             | 8           | gt1           | 0.002000    |          |
| 2D ACQUISITION |             | gzlv13        | 505         |          |
| sw1            | 21367.5     | gt3           | 0.001000    |          |
| ni             | 128         | gstab         | 0.000500    |          |
| phase          | arrayed     | F2 PROCESSING |             |          |
| TRANSMITTER    |             | gf            | 0.059       |          |
| tn             | H1          | gfs           | not used    |          |
| sfrq           | 499.832     | fn            | 1024        |          |
| tof            | -499.9      | F1 PROCESSING |             |          |
| tpwr           | 62          | gf1           | 0.006       |          |
| pw             | 13.800      | gfs1          | not used    |          |
| DECOUPLER      |             | procl         | lp          |          |
| dn             | C13         | fn1           | 2048        |          |
| dof            | -2515.1     | DISPLAY       |             |          |
| dm             | nny         | sp            | 673.7       |          |
| dmm            | ccp         | wp            | 3157.5      |          |
| dmf            | 32258       | sp1           | 2969.8      |          |
| dpwr           | 43          | wp1           | 13876.4     |          |
| px1vl          | 61          | rfl           | 3496.9      |          |
| px             | 11.000      | rfp           | 3482.8      |          |
| HSQC           |             | rfl1          | 17546.3     |          |
| j1xh           | 140.0       | rfl1          | 16259.3     |          |
| nullflg        | y           | PLOT          |             |          |
| mult           | 2           | wc            | 150.0       |          |
|                |             | sc            | 6.2         |          |
|                |             | wc2           | 116.2       |          |
|                |             | sc2           | 0           |          |
|                |             | vs            | 60          |          |
|                |             | th            | 6           |          |
|                |             | ai            | cdc         | ph       |

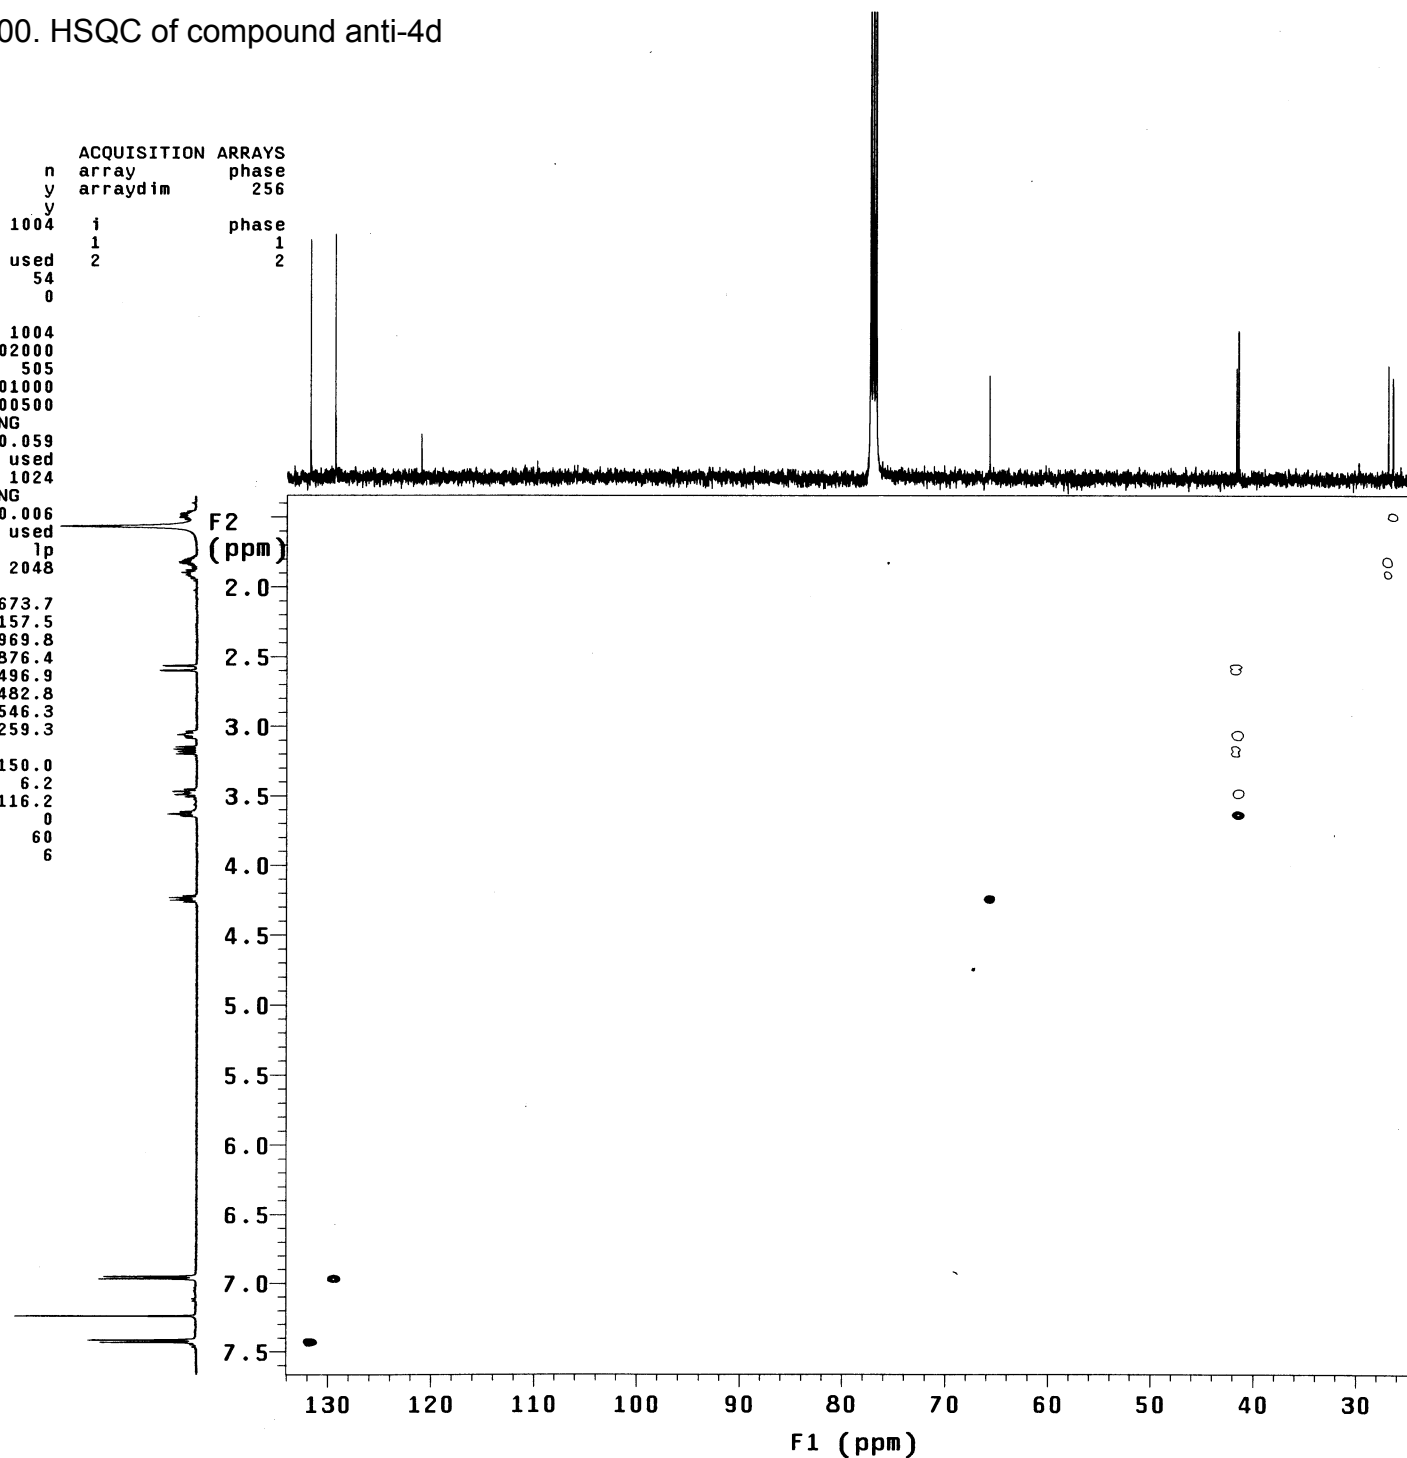

LCH-02-356-P2

exp74 gCOSY

| SAMPLE         |             | FLAGS         |          |
|----------------|-------------|---------------|----------|
| date           | Jan 11 2015 | hs            | nn       |
| solvent        | cdcl3       | sspul         | n        |
| sample         | undefined   | hsglv1        | 1004     |
| ACQUISITION    |             | SPECIAL       |          |
| sw             | 4001.6      | temp          | not used |
| at             | 0.128       | gain          | 34       |
| np             | 1024        | spin          | 0        |
| fb             | not used    | F2 PROCESSING |          |
| ss             | 16          | sb            | -0.064   |
| d1             | 1.000       | sbs           | not used |
| nt             | 8           | fn            | 1024     |
| 2D ACQUISITION |             | F1 PROCESSING |          |
| sw1            | 4001.6      | sb1           | -0.032   |
| ni             | 128         | sbs1          | not used |
| TRANSMITTER    |             | DISPLAY       |          |
| tn             | H1          | procl         | lp       |
| sfrq           | 499.832     | fn1           | 1024     |
| tof            | -499.9      | sp            | 293.3    |
| tpwr           | 62          | wp            | 3517.0   |
| pw             | 13.800      | sp1           | 284.4    |
| GRADIENTS      |             | wp1           | 3517.0   |
| gzlv11         | 1004        | rfl           | 3502.2   |
| gt1            | 0.001000    | rflp          | 3482.8   |
| gstab          | 0.000500    | rfl1          | 3503.3   |
| DECOUPLER      |             | rflp1         | 3482.8   |
| dn             | C13         | PLOT          |          |
| dm             | nnn         | wc            | 155.0    |
|                |             | sc            | 10.0     |
|                |             | wc2           | 155.0    |
|                |             | sc2           | 0        |
|                |             | vs            | 60       |
|                |             | th            | 10       |
|                |             | ai            | cdc av   |

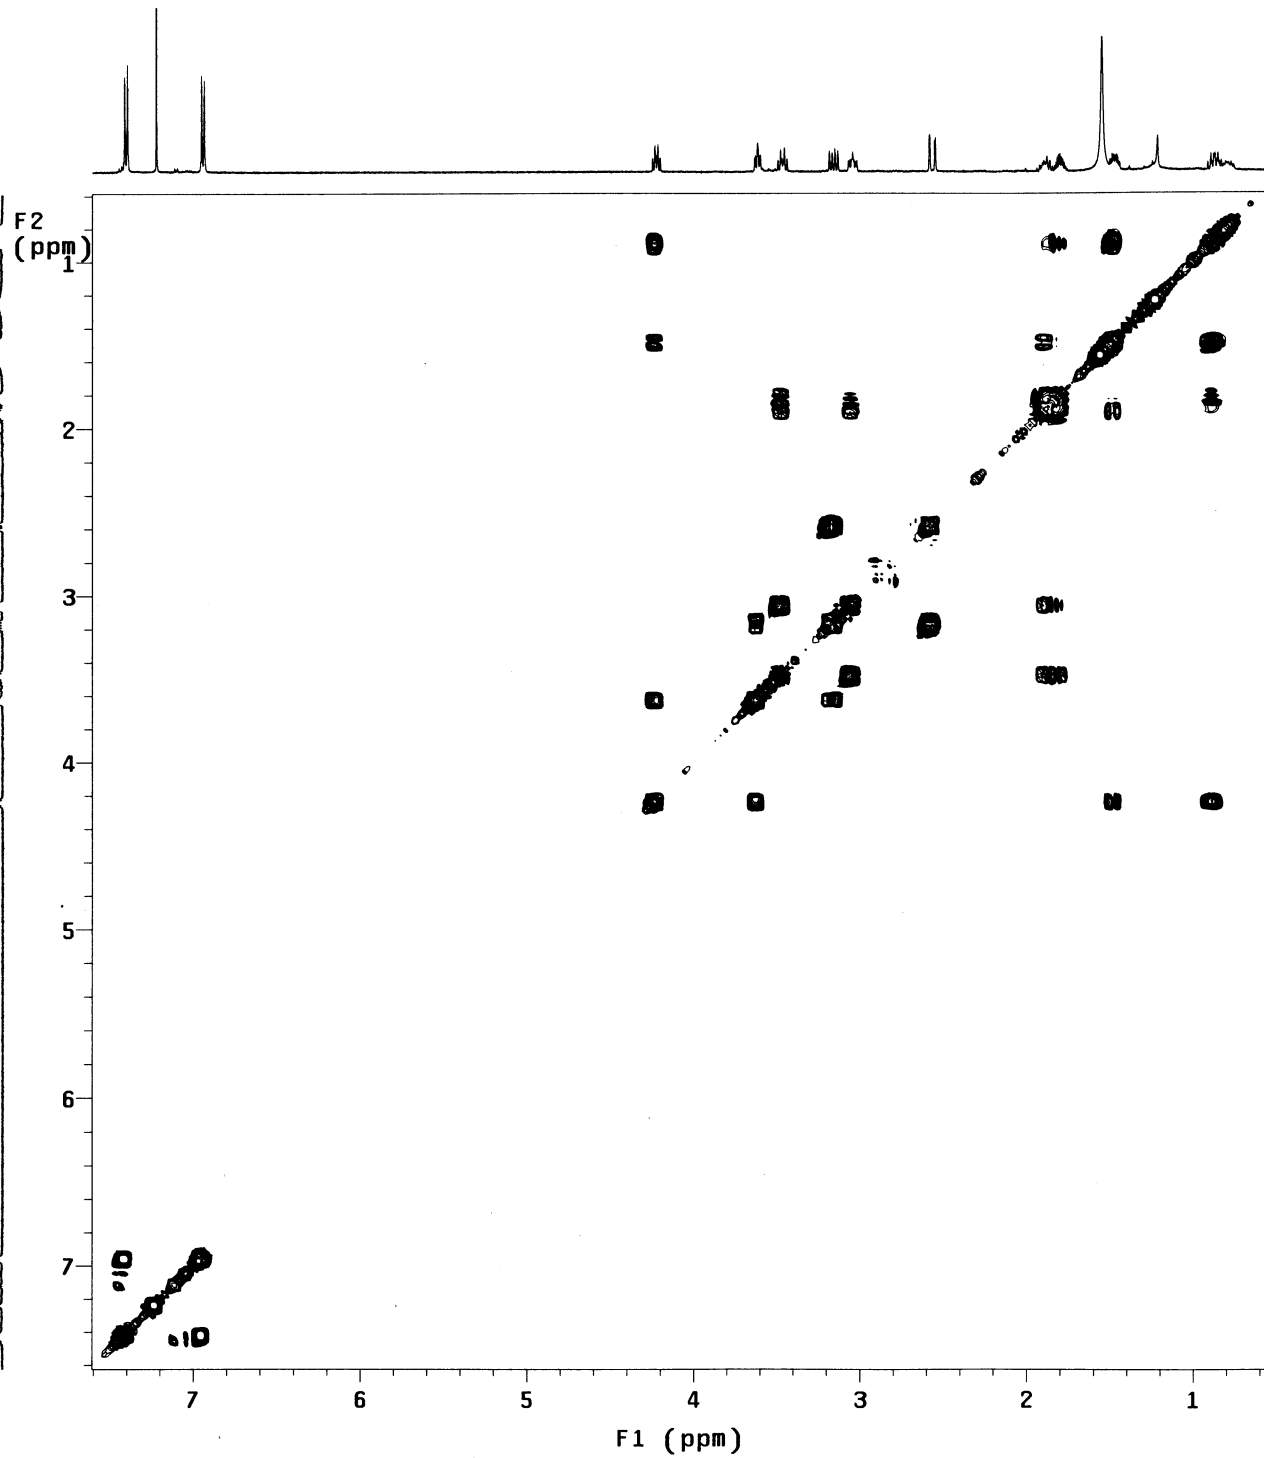

Fig S201. COSY of compound anti-4d

LCH-02-356-P2

exp75 NOESY

| SAMPLE         |             | FLAGS         | n        |
|----------------|-------------|---------------|----------|
| date           | Jan 11 2015 | hs            | y        |
| solvent        | cdcl3       | sspul         | y        |
| sample         | undefined   | PFGflg        | y        |
| ACQUISITION    |             | hsglv         | 1004     |
| sw             | 4001.6      | SPECIAL       |          |
| at             | 0.128       | temp          | not used |
| np             | 1024        | gain          | 34       |
| fb             | not used    | spin          | 0        |
| ss             | 32          | F2 PROCESSING |          |
| d1             | 1.000       | gf            | 0.059    |
| nt             | 16          | gfs           | not used |
| 2D ACQUISITION |             | fn            | 1024     |
| sw1            | 4001.6      | F1 PROCESSING |          |
| ni             | 200         | gf1           | 0.046    |
| TRANSMITTER    |             | gfs1          | not used |
| tn             | H1          | procl         | lp       |
| sfrq           | 499.832     | fn1           | 1024     |
| tof            | -499.9      | DISPLAY       |          |
| tpwr           | 62          | sp            | 297.8    |
| pw             | 13.800      | wp            | 3556.1   |
| NOESY          |             | sp1           | 286.9    |
| mix            | 0.600       | wp1           | 3556.1   |
| PRESATURATION  |             | rfl           | 3497.6   |
| satmode        | nnnn        | rfp           | 3482.8   |
| satpwr         | 0           | rfl1          | 3636.7   |
| satdly         | 0           | rfp1          | 3618.8   |
| satfrq         | 0           | PLOT          |          |
| DECOUPLER      |             | wc            | 155.0    |
| dn             | C13         | sc            | 10.0     |
| dm             | nnn         | wc2           | 155.0    |
|                |             | sc2           | 0        |
|                |             | vs            | 60       |
|                |             | th            | 2        |
|                |             | ai            | ph       |

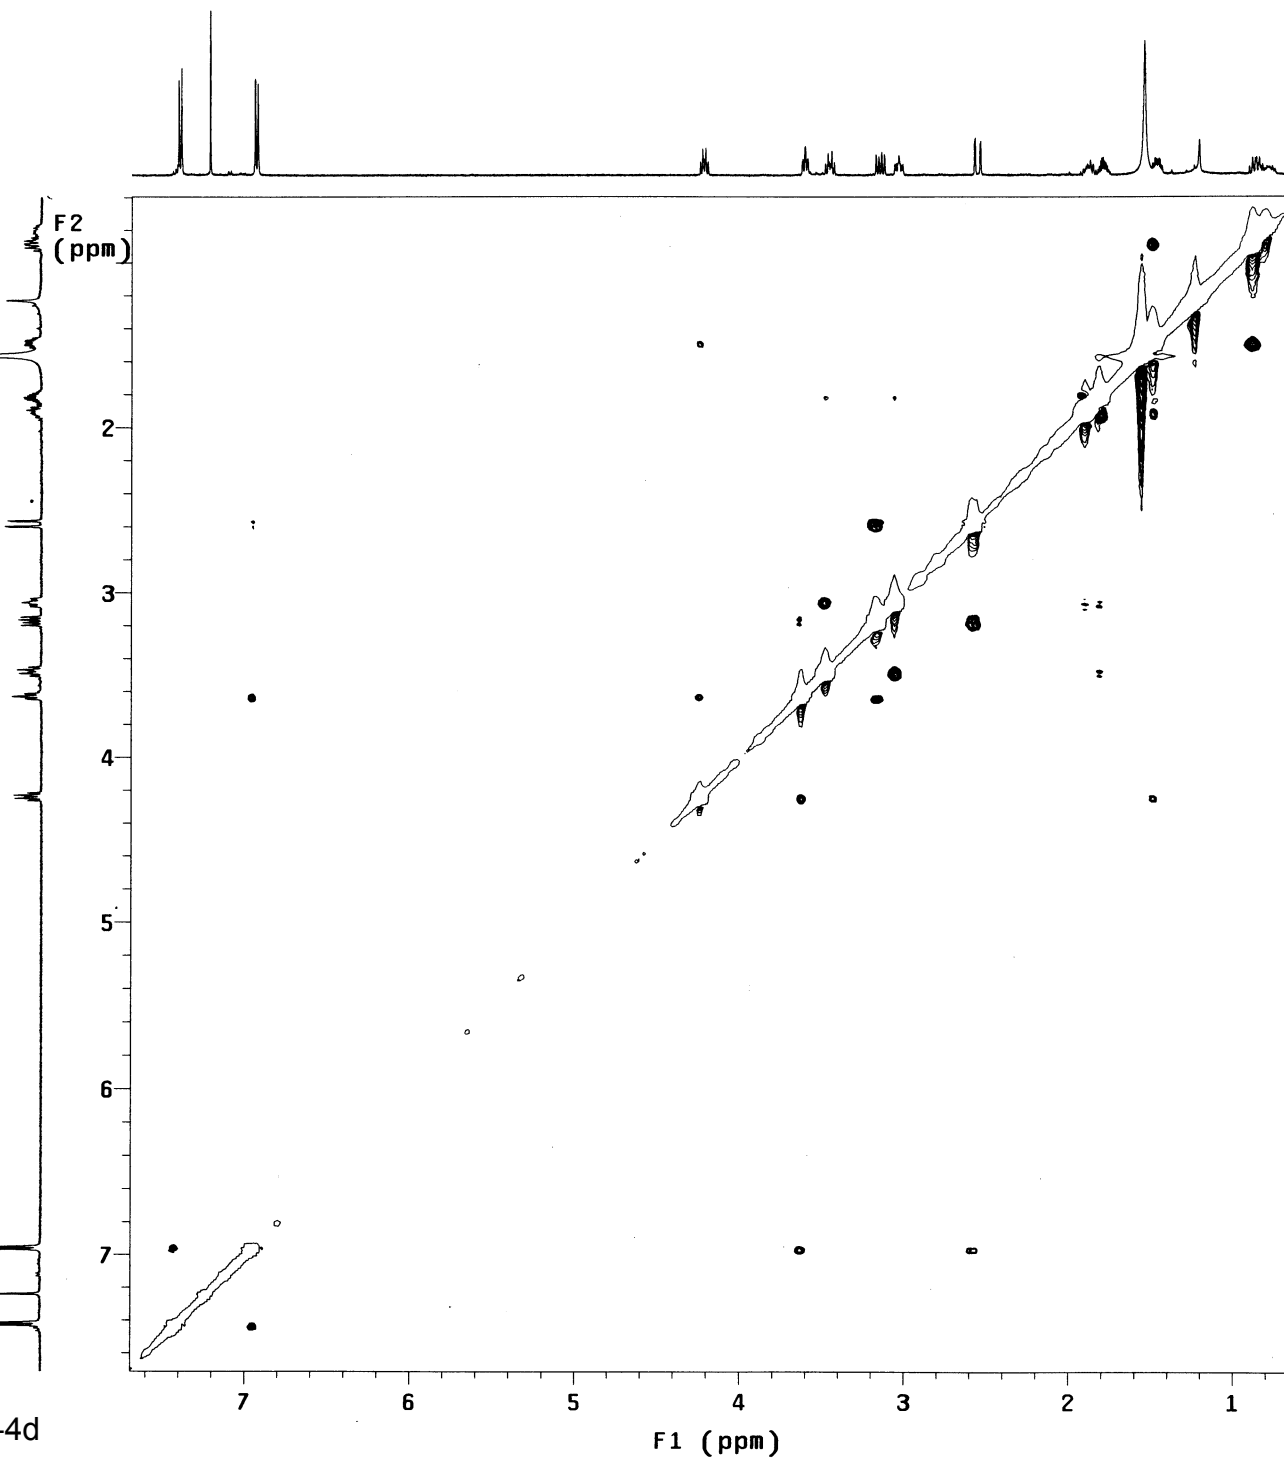

Fig S202. NOESY of compound anti-4d

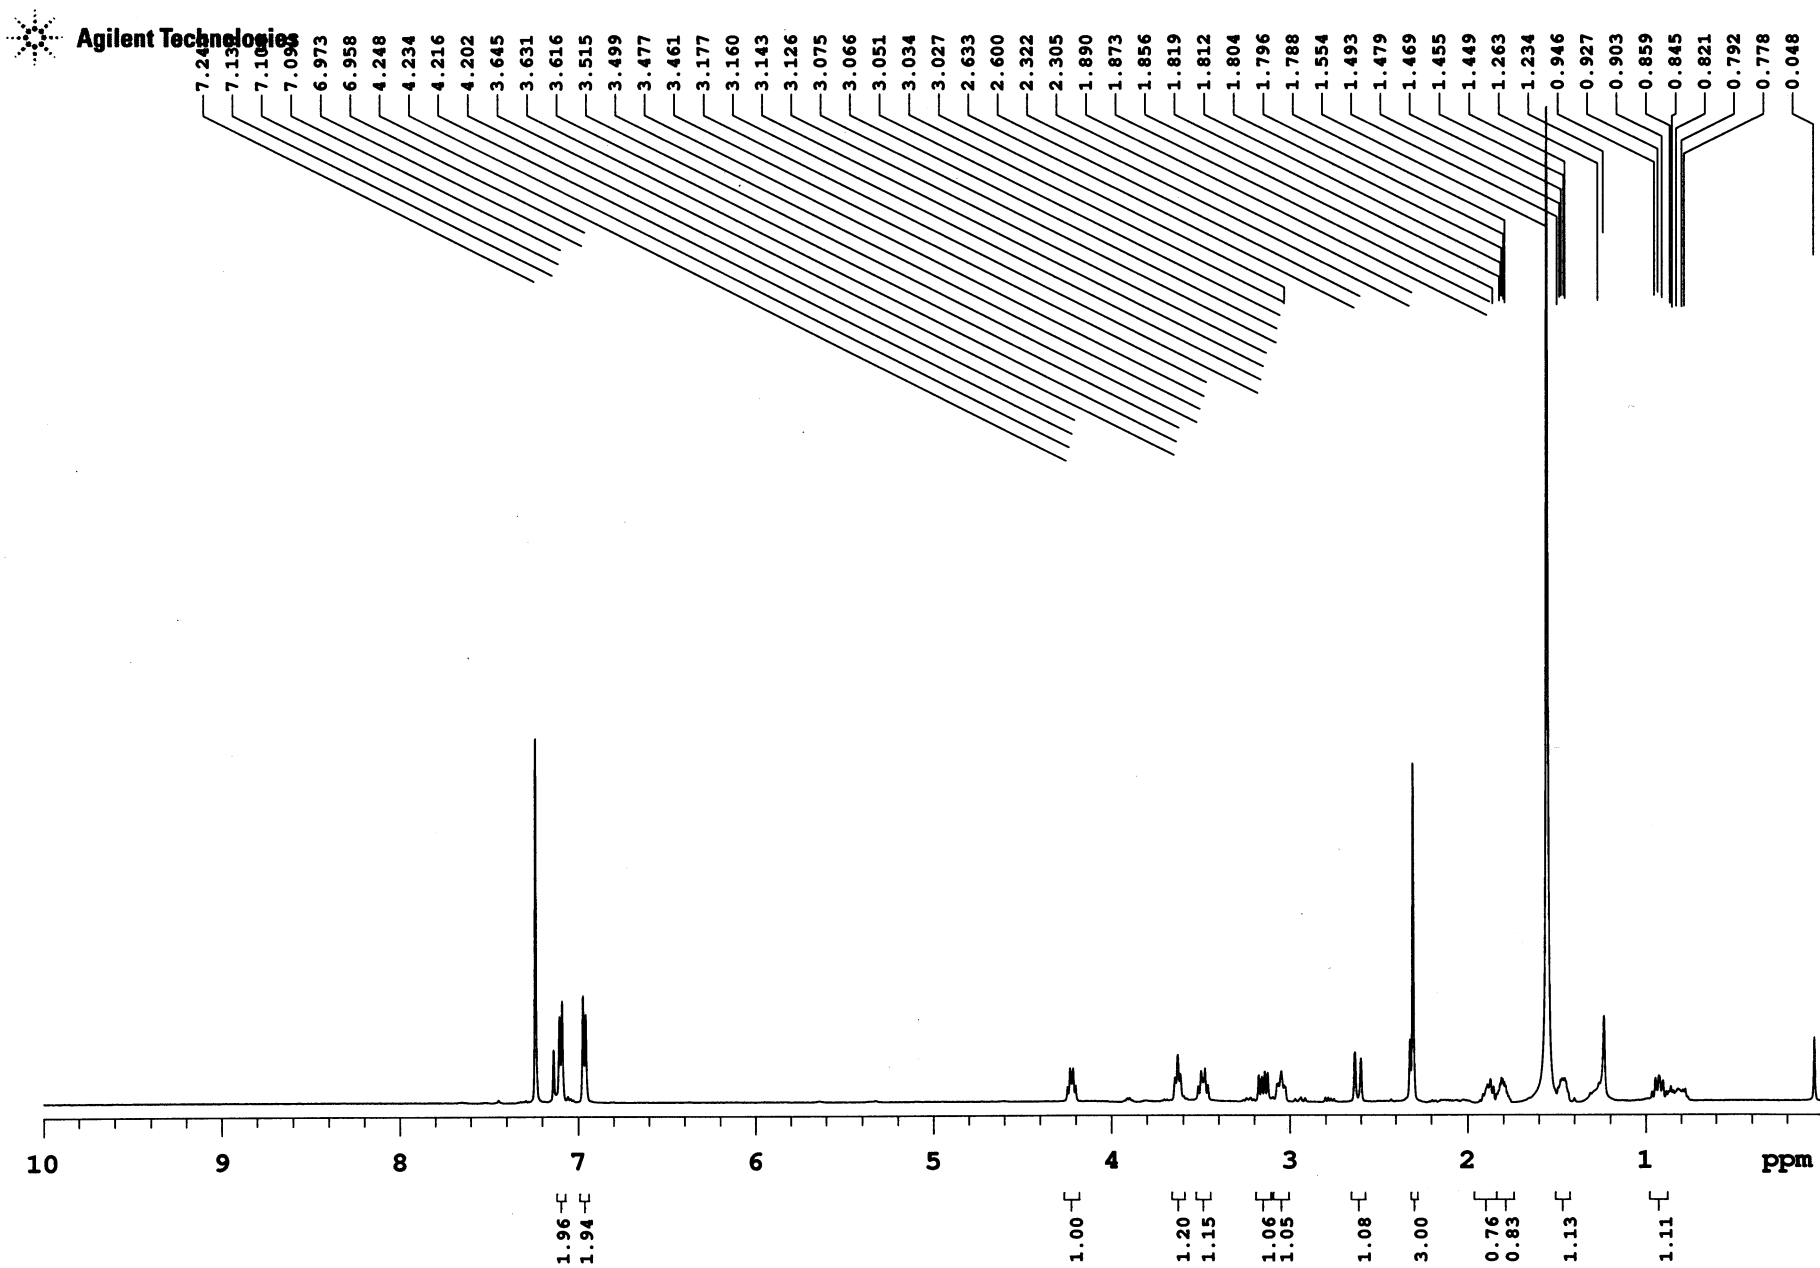

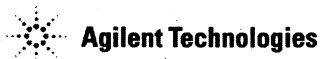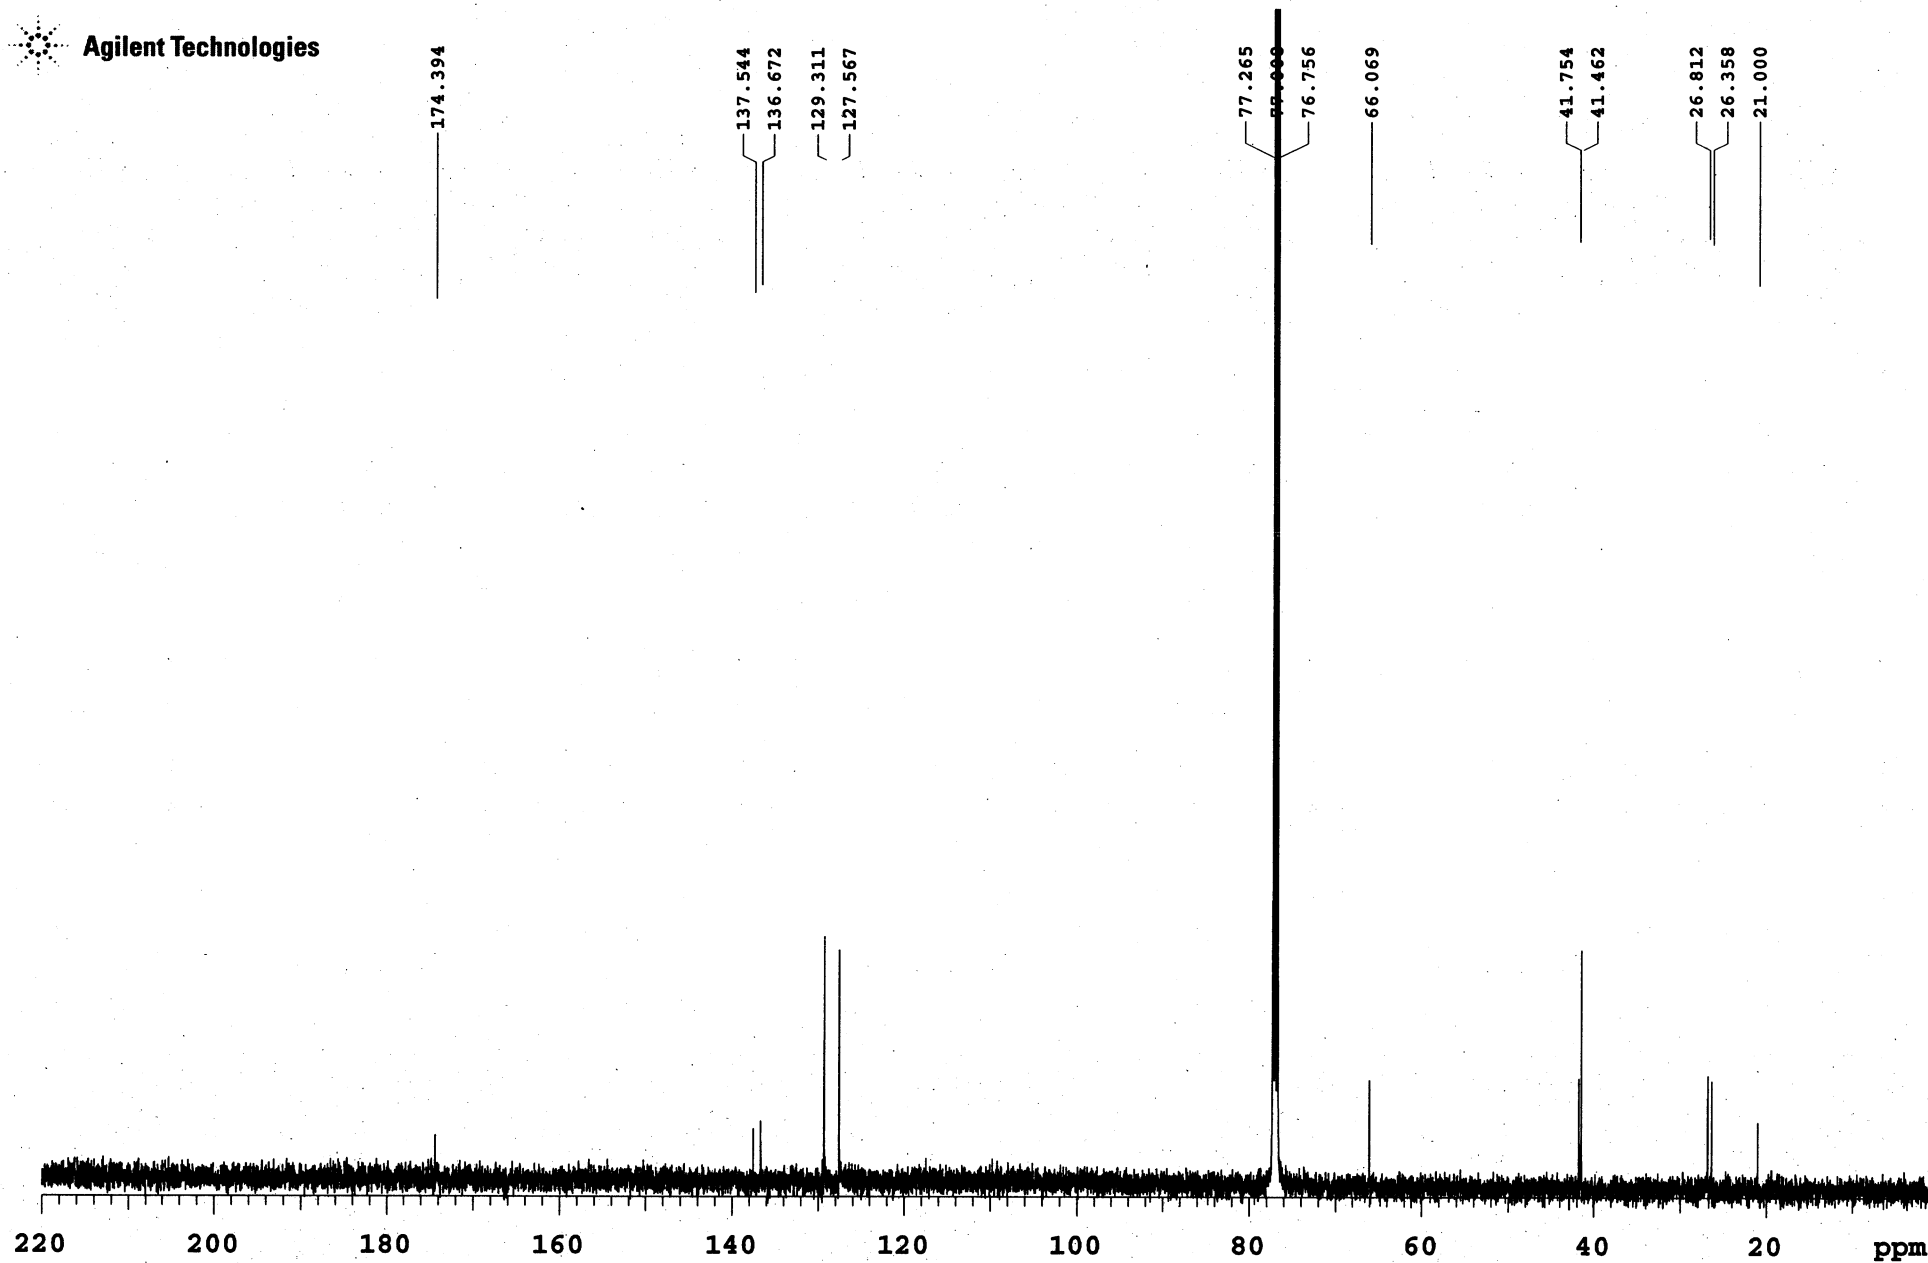Fig S204. <sup>13</sup>C NMR (CDCl<sub>3</sub>, 125 MHz) of compound anti-4e



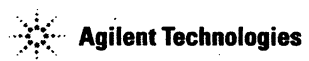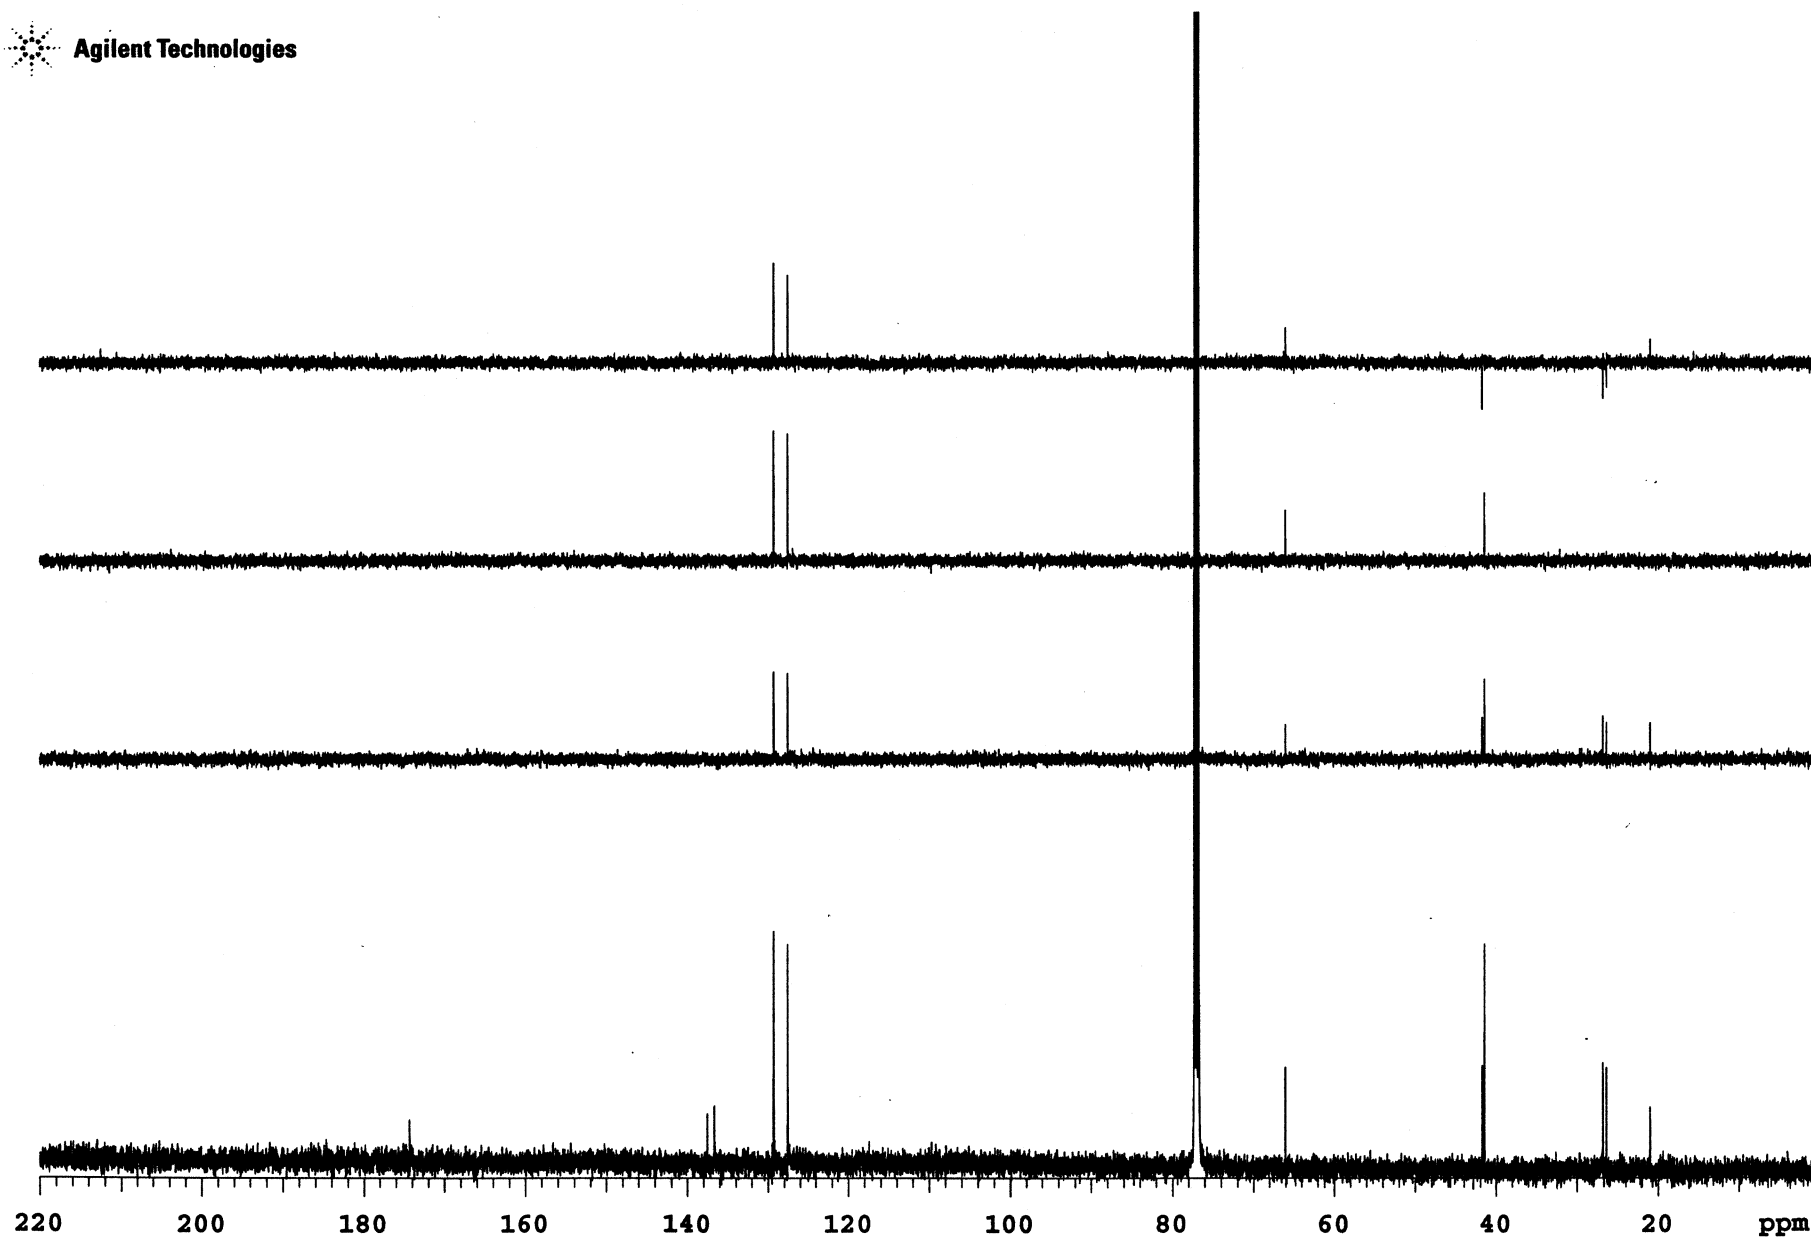

Fig S205. DEPT of compound anti-4e

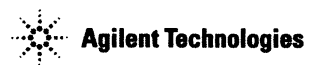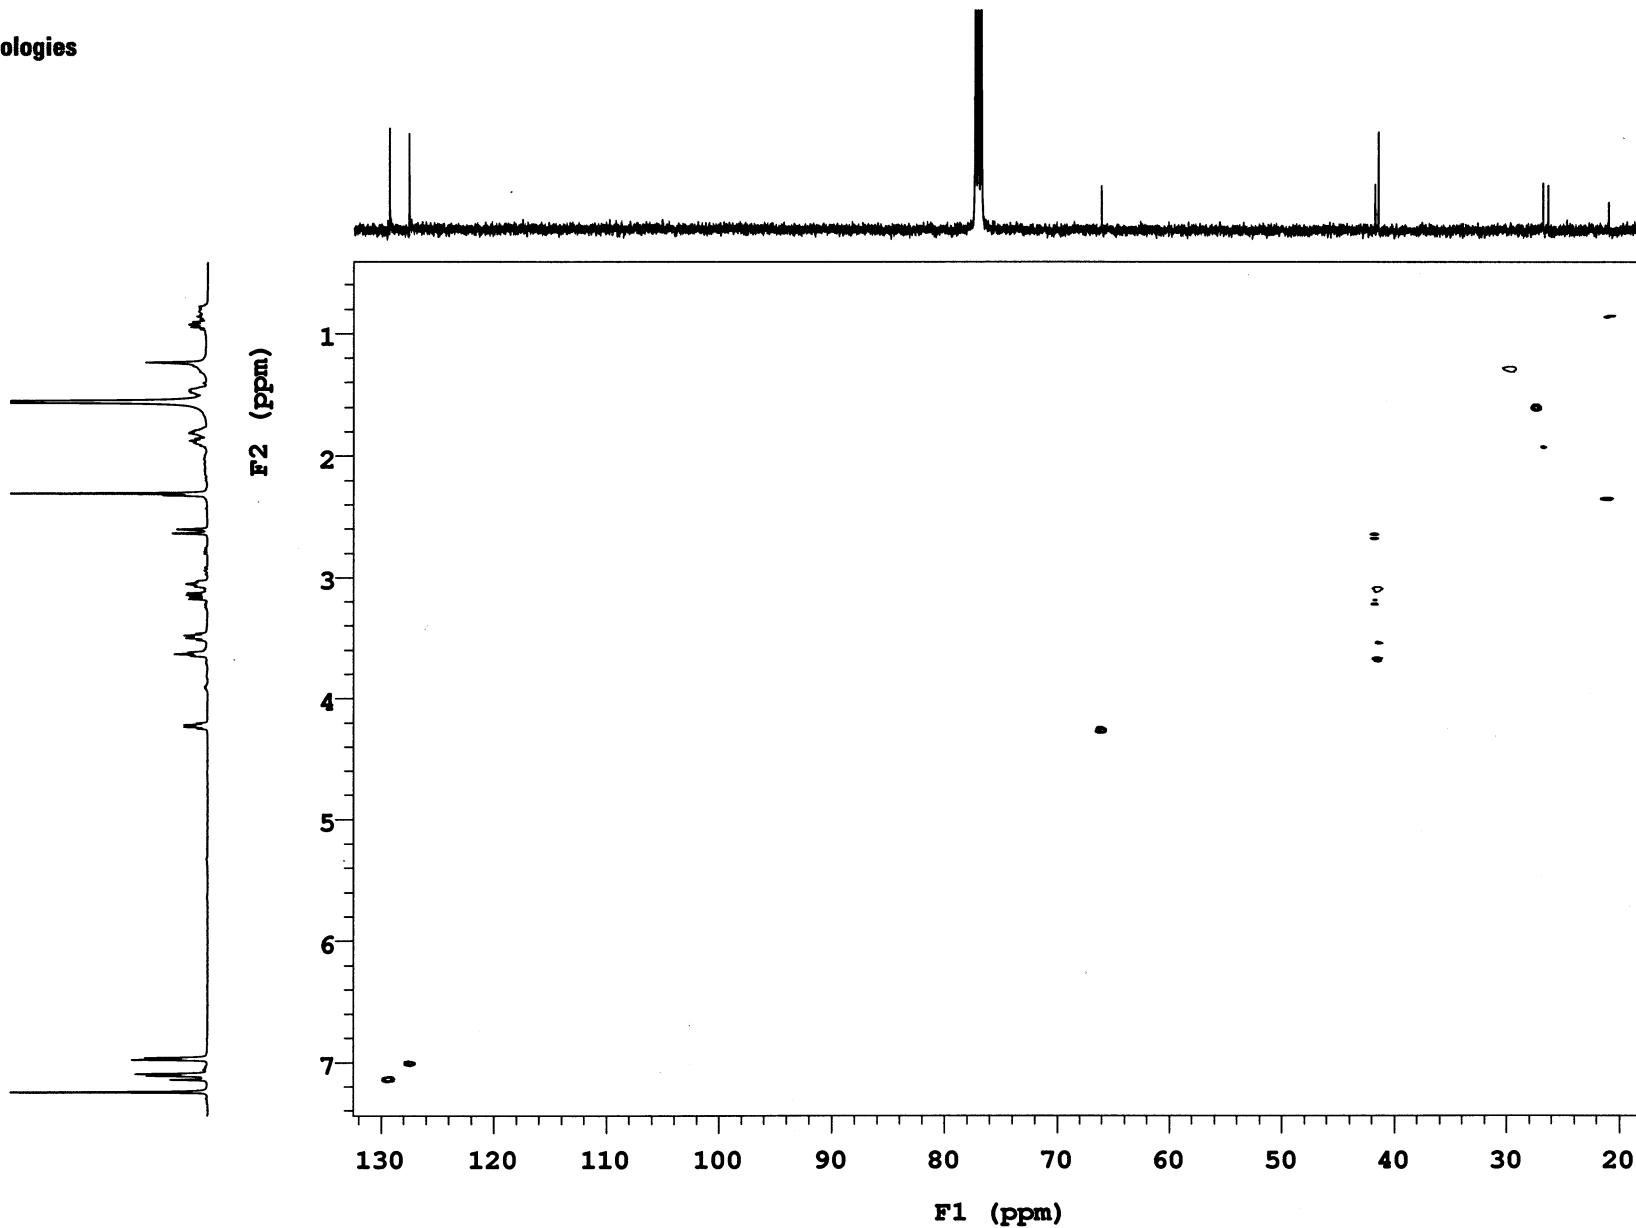

Fig S206. HSQC of compound anti-4e

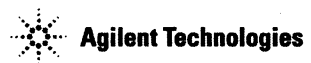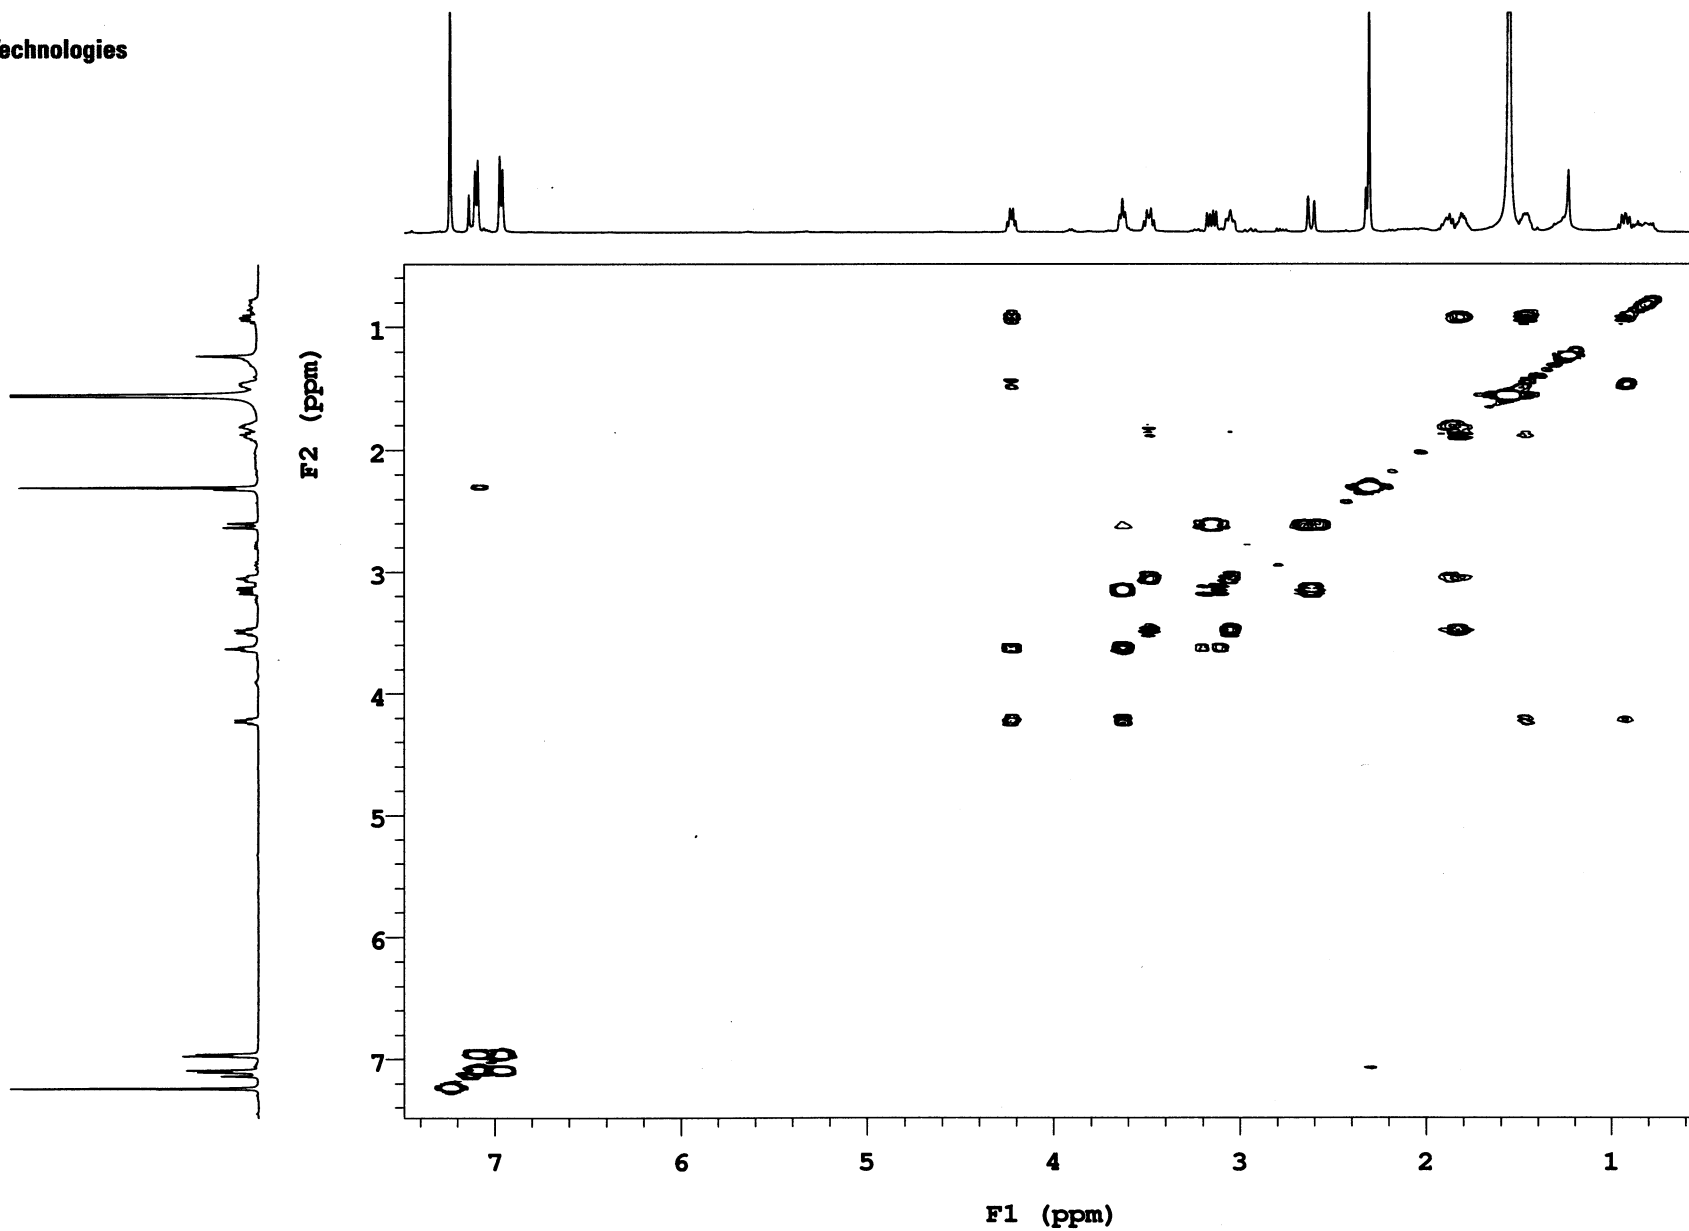

Fig S207. COSY of compound anti-4e

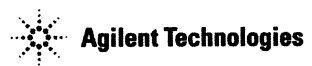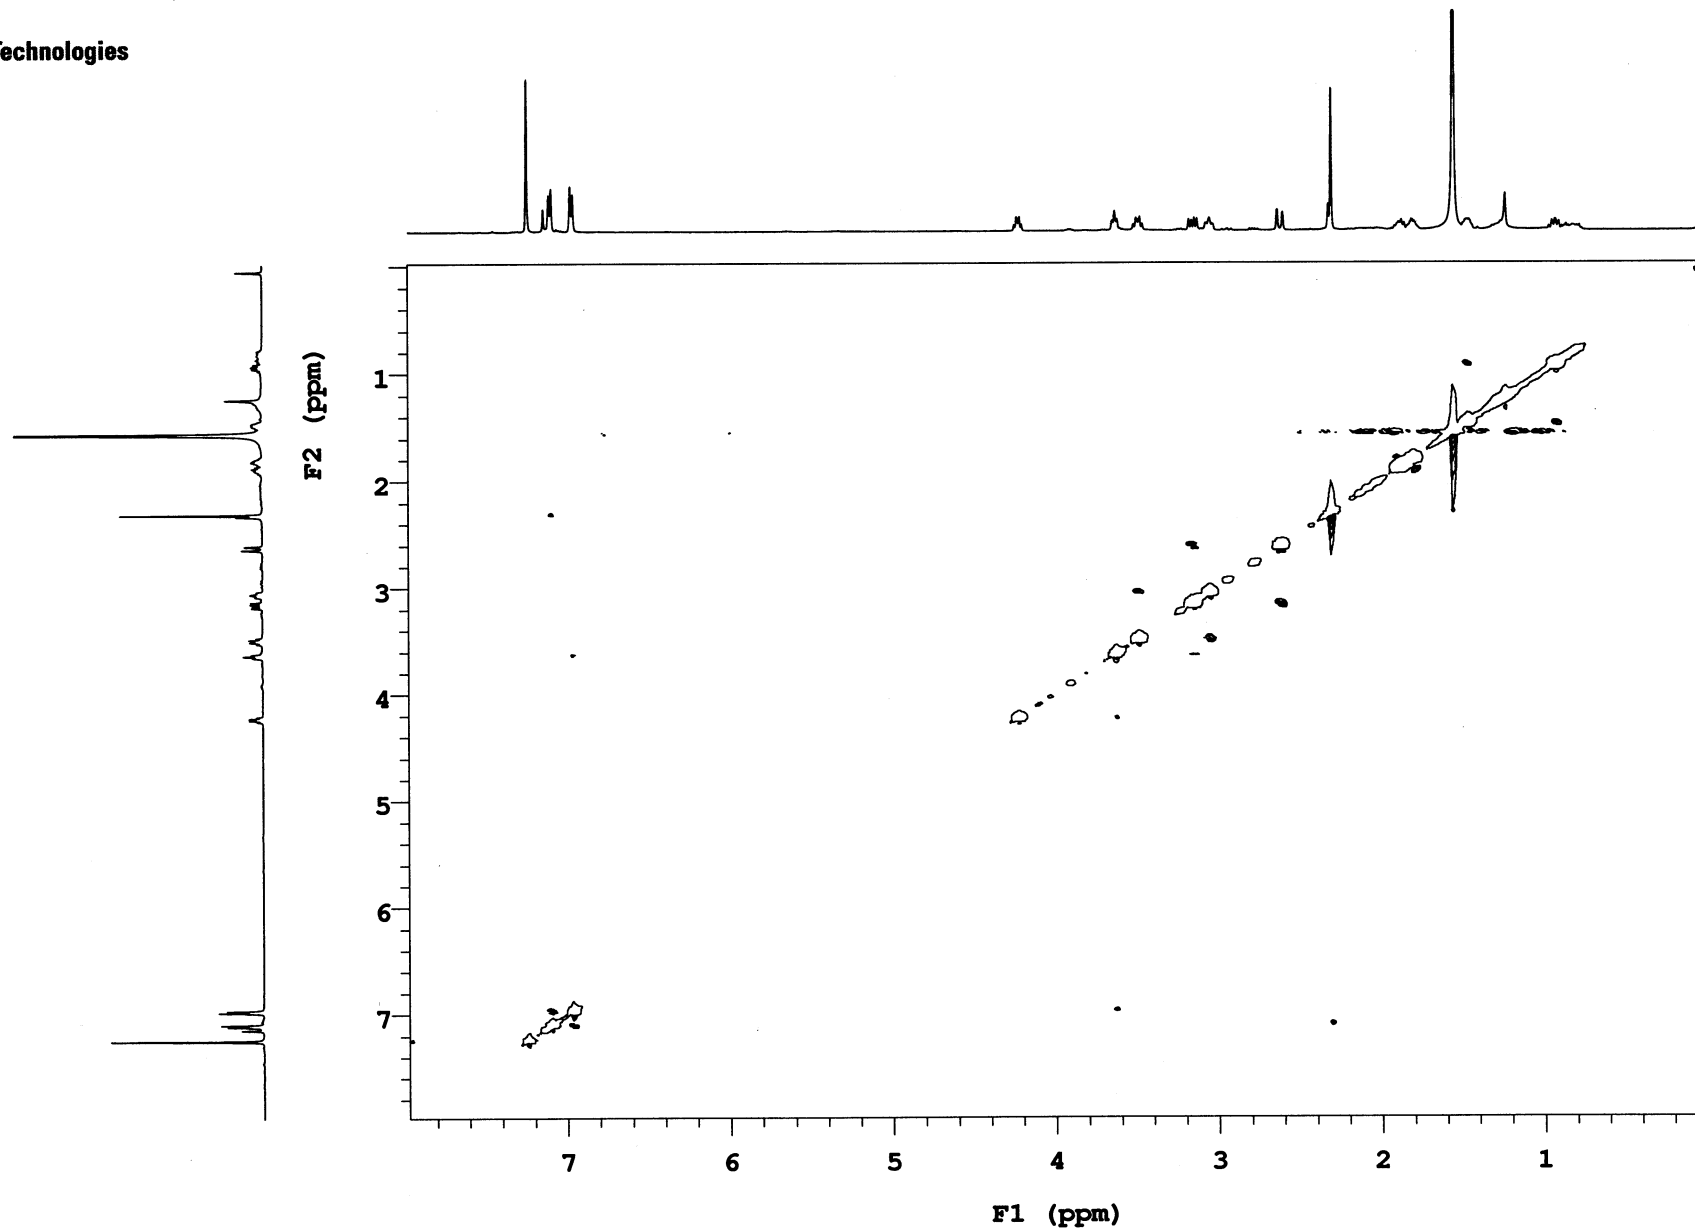

Fig S208. NOESY of compound anti-4e

Sample Name **LCH-02-406**  
Date collected **2015-06-24**Pulse sequence **PROTON**  
Solvent **cdcl3**Temperature **26**  
Spectrometer **Agilent-NMR-inova500**Study owner **vnmr2**  
Operator **vnmr2**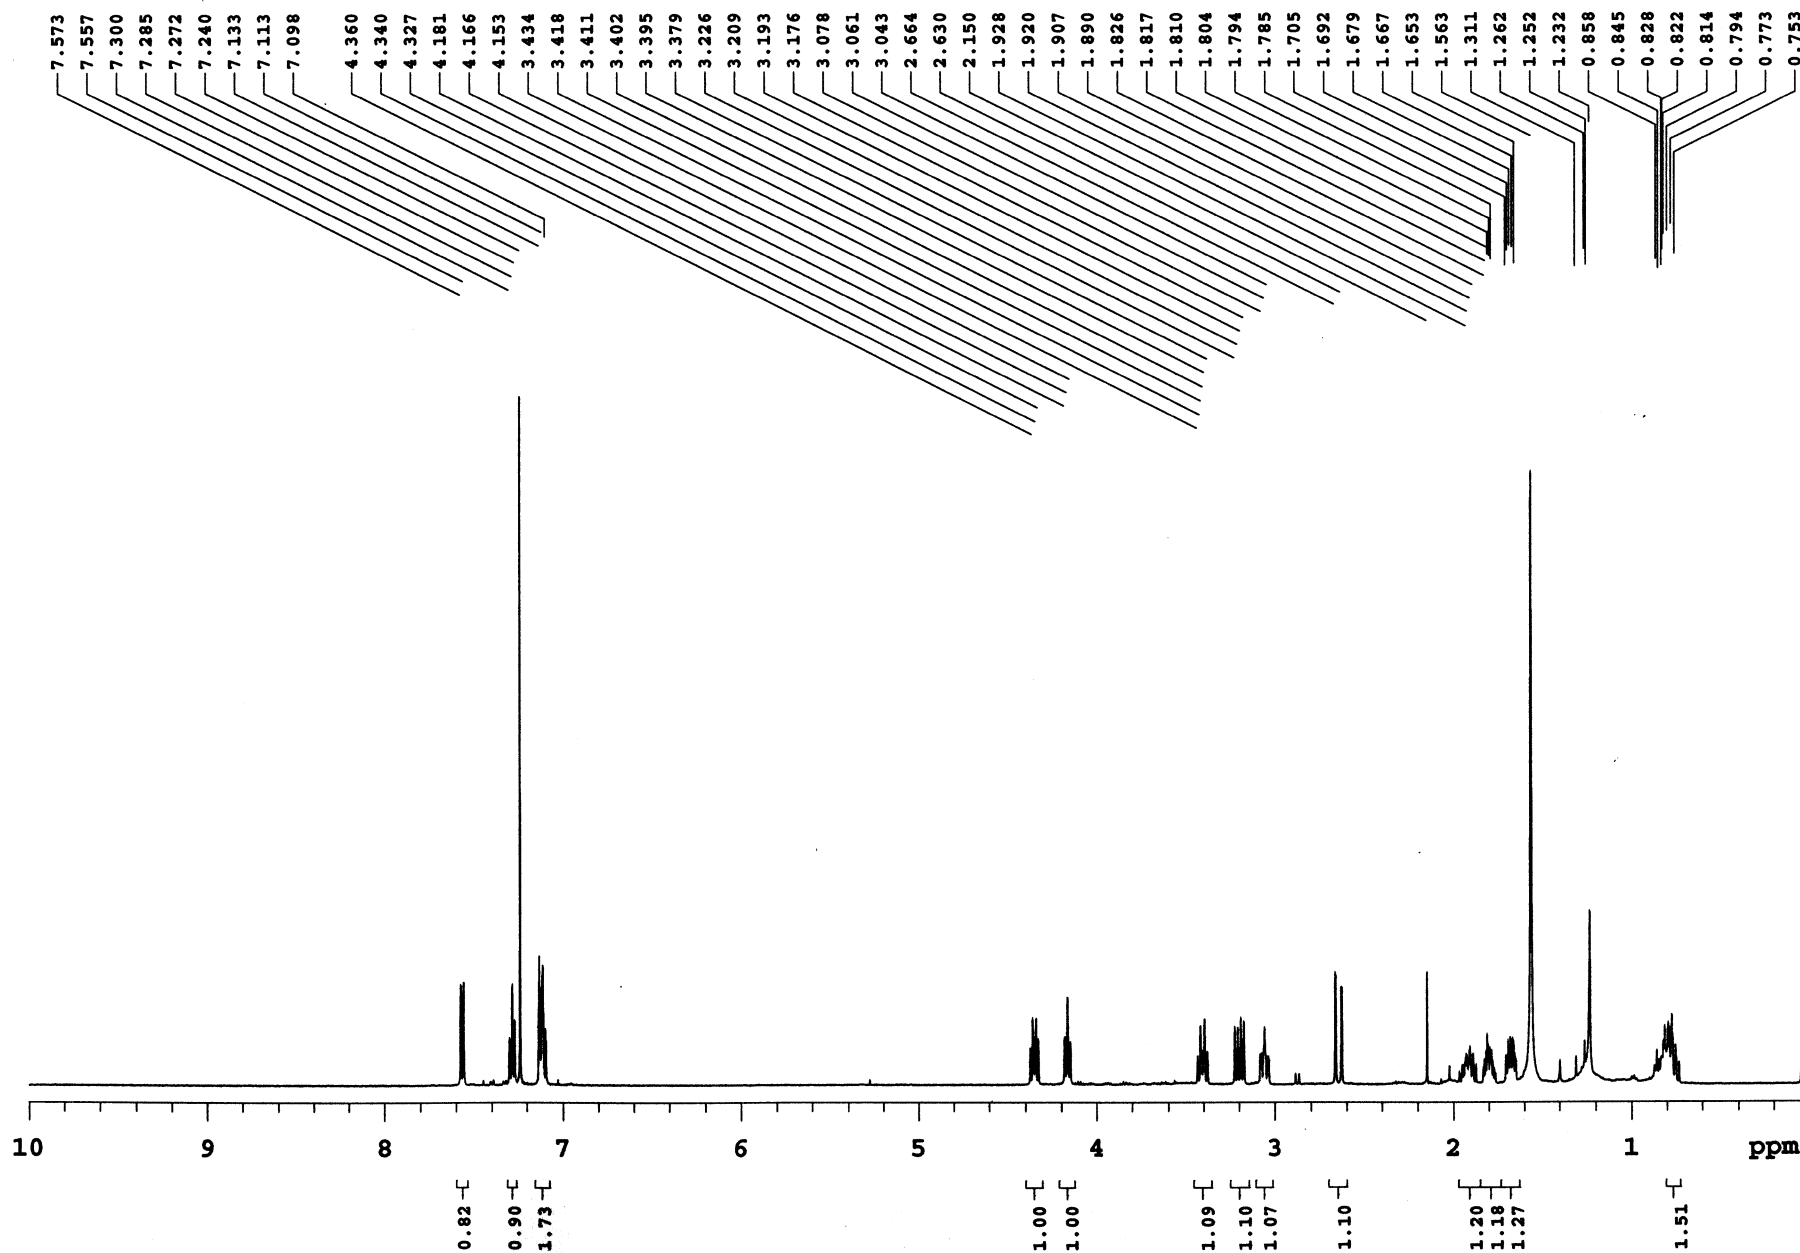Fig S209.  $^1\text{H}$  NMR ( $\text{CDCl}_3$ , 500 MHz) of compound anti-4f

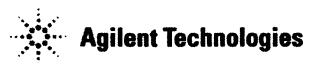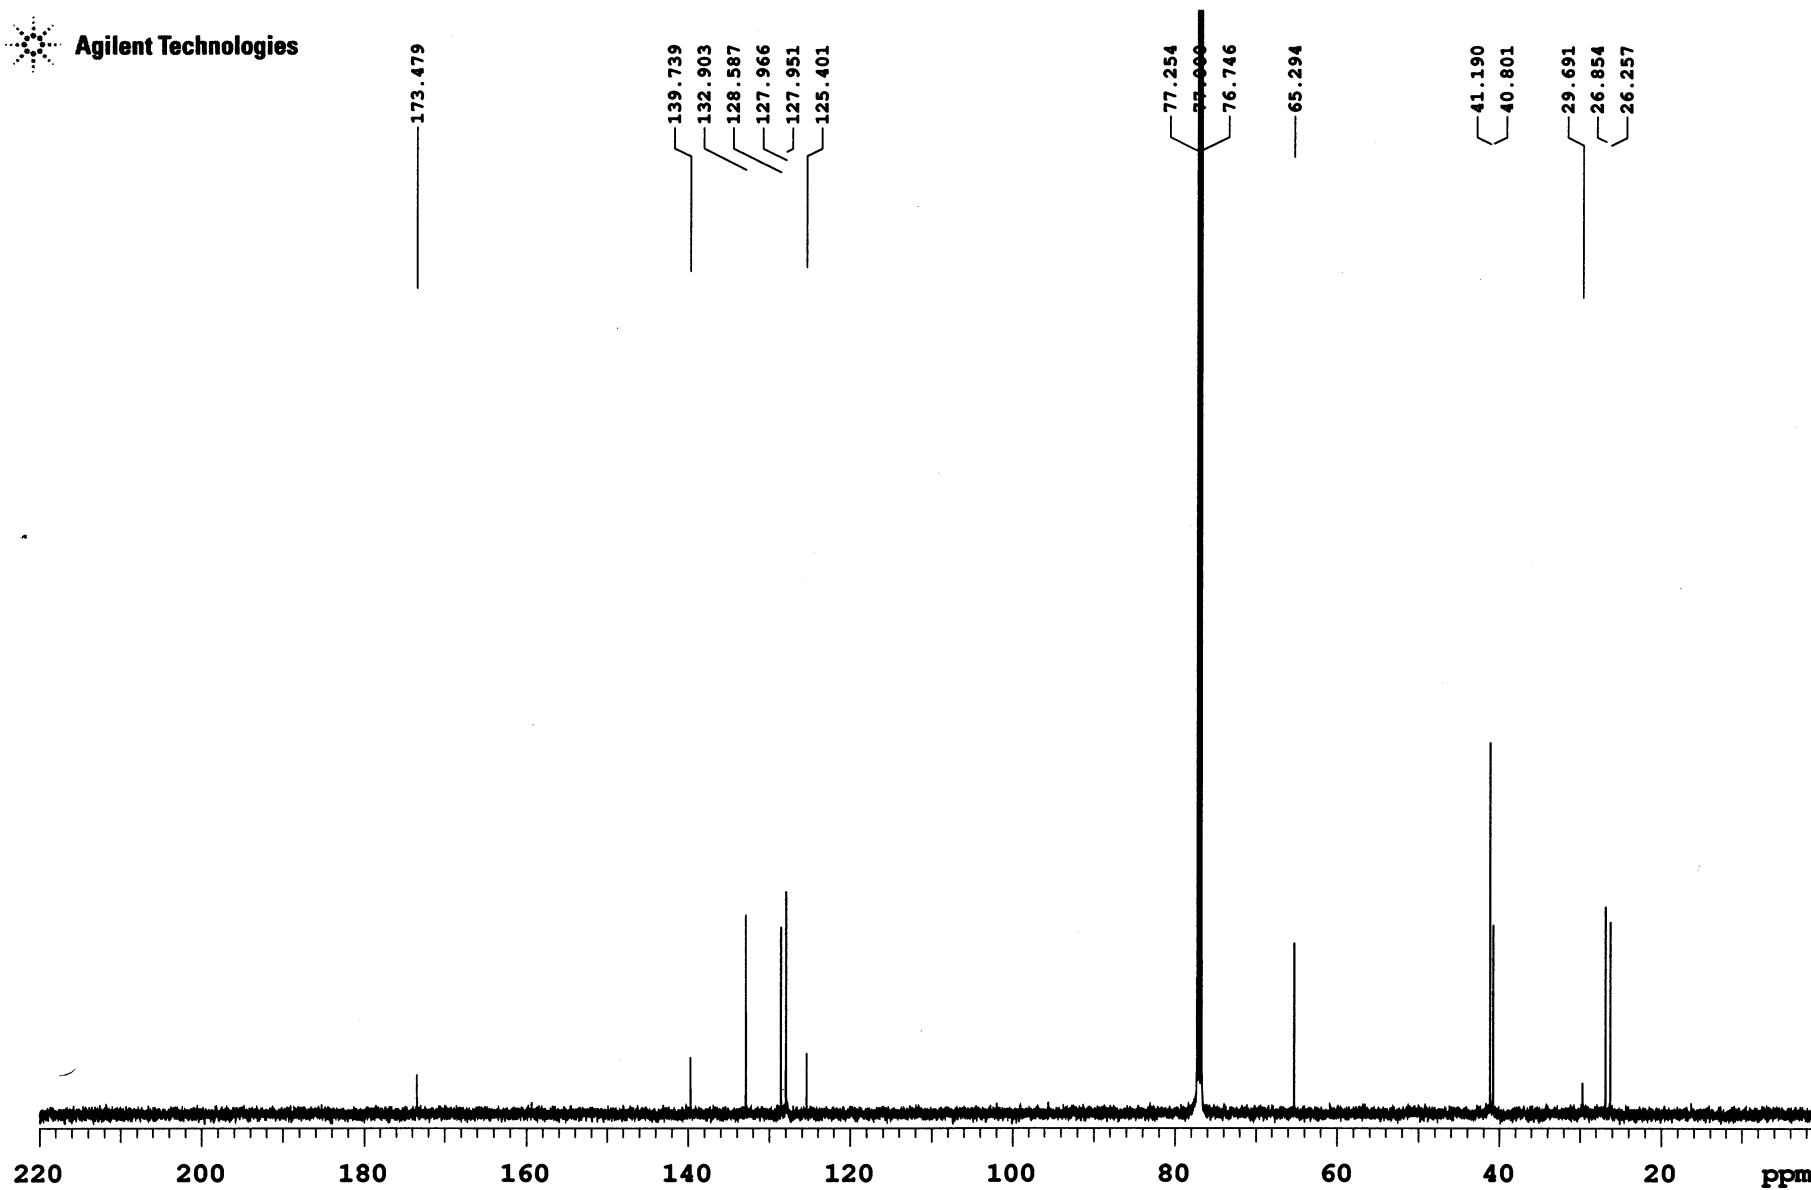Fig S210. <sup>13</sup>C NMR (CDCl<sub>3</sub>, 125 MHz) of compound anti-4f

Sample Name **LCH-02-406**  
Date collected **2015-06-23**Pulse sequence **DEPT**  
Solvent **cdcl3**Temperature **26**  
Spectrometer **Agilent-NMR-inova500**Study owner **vnmr2**  
Operator **vnmr2**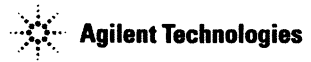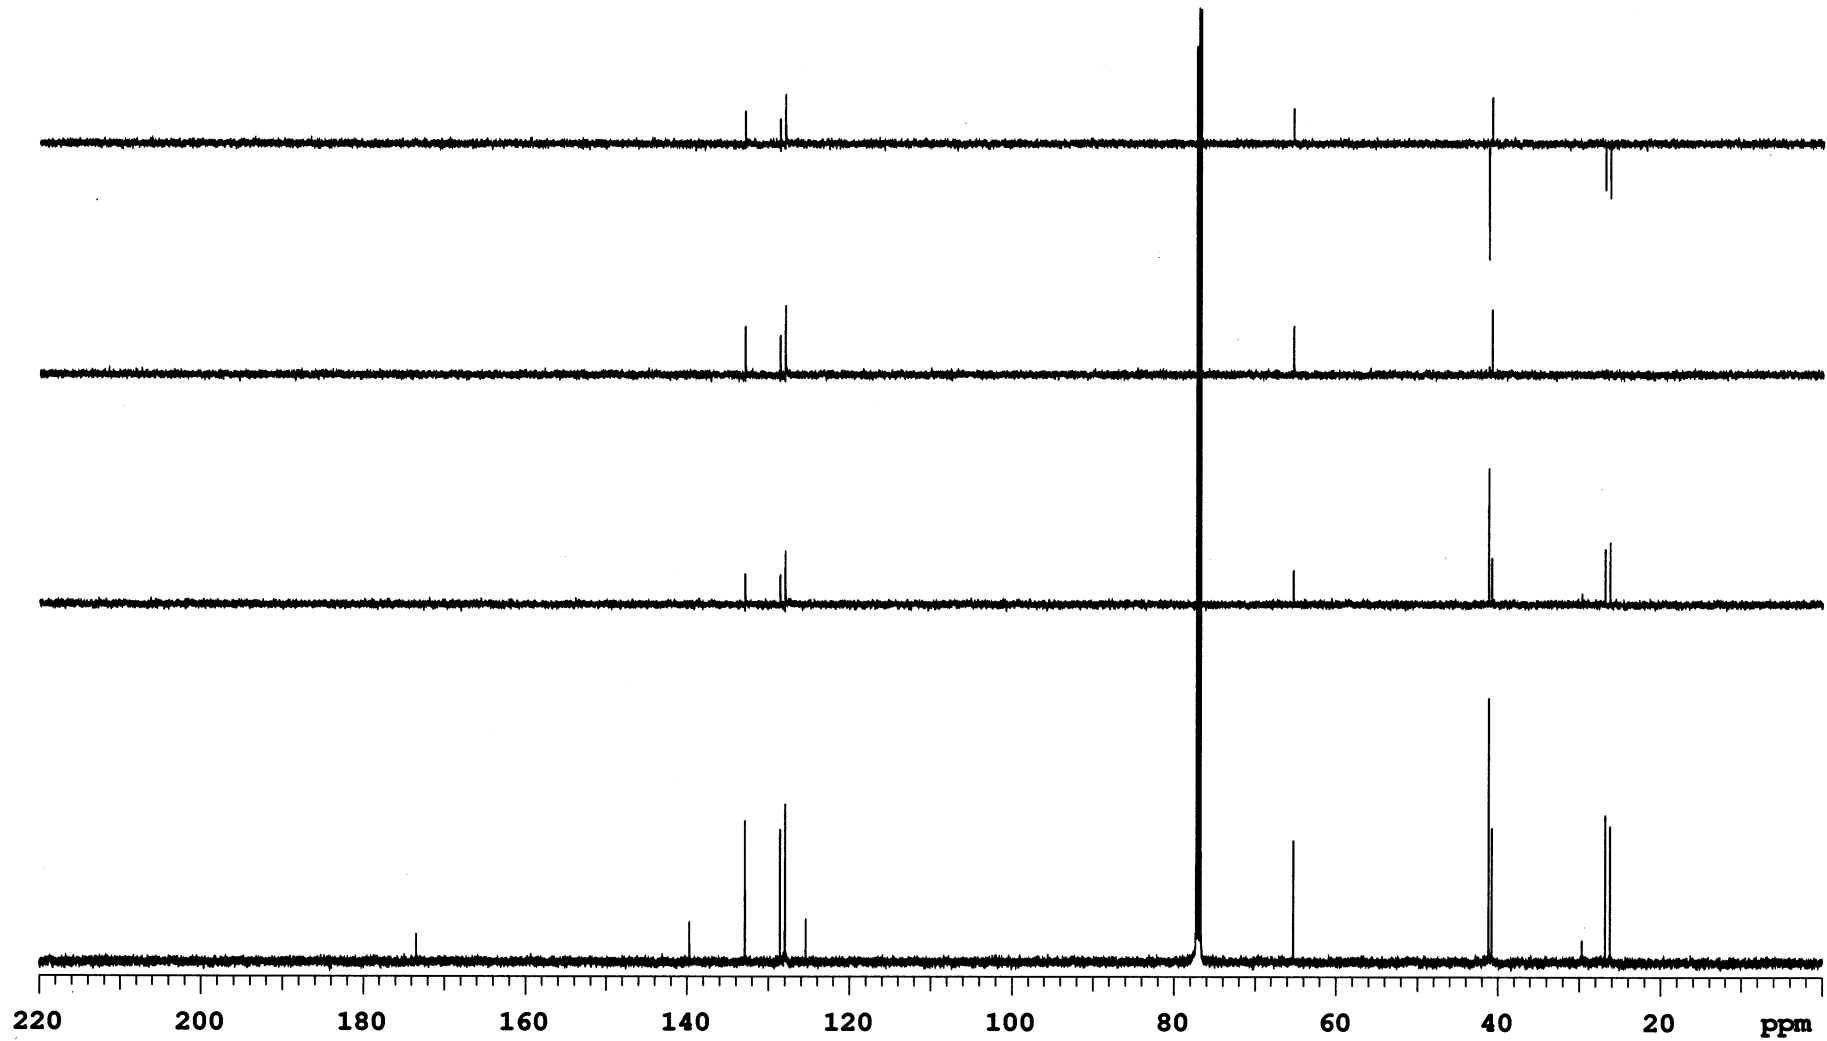

Fig S211. DEPT of compound anti-4f

LCH-02-406

Sample Name **LCH-02-406**  
Date collected **2015-05-19**Pulse sequence **gHSQC**  
Solvent **cdcl3**Temperature **25**  
Spectrometer **Agilent-NMR-inova500**Study owner **vnmr2**  
Operator **vnmr2**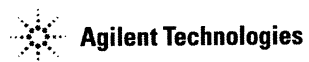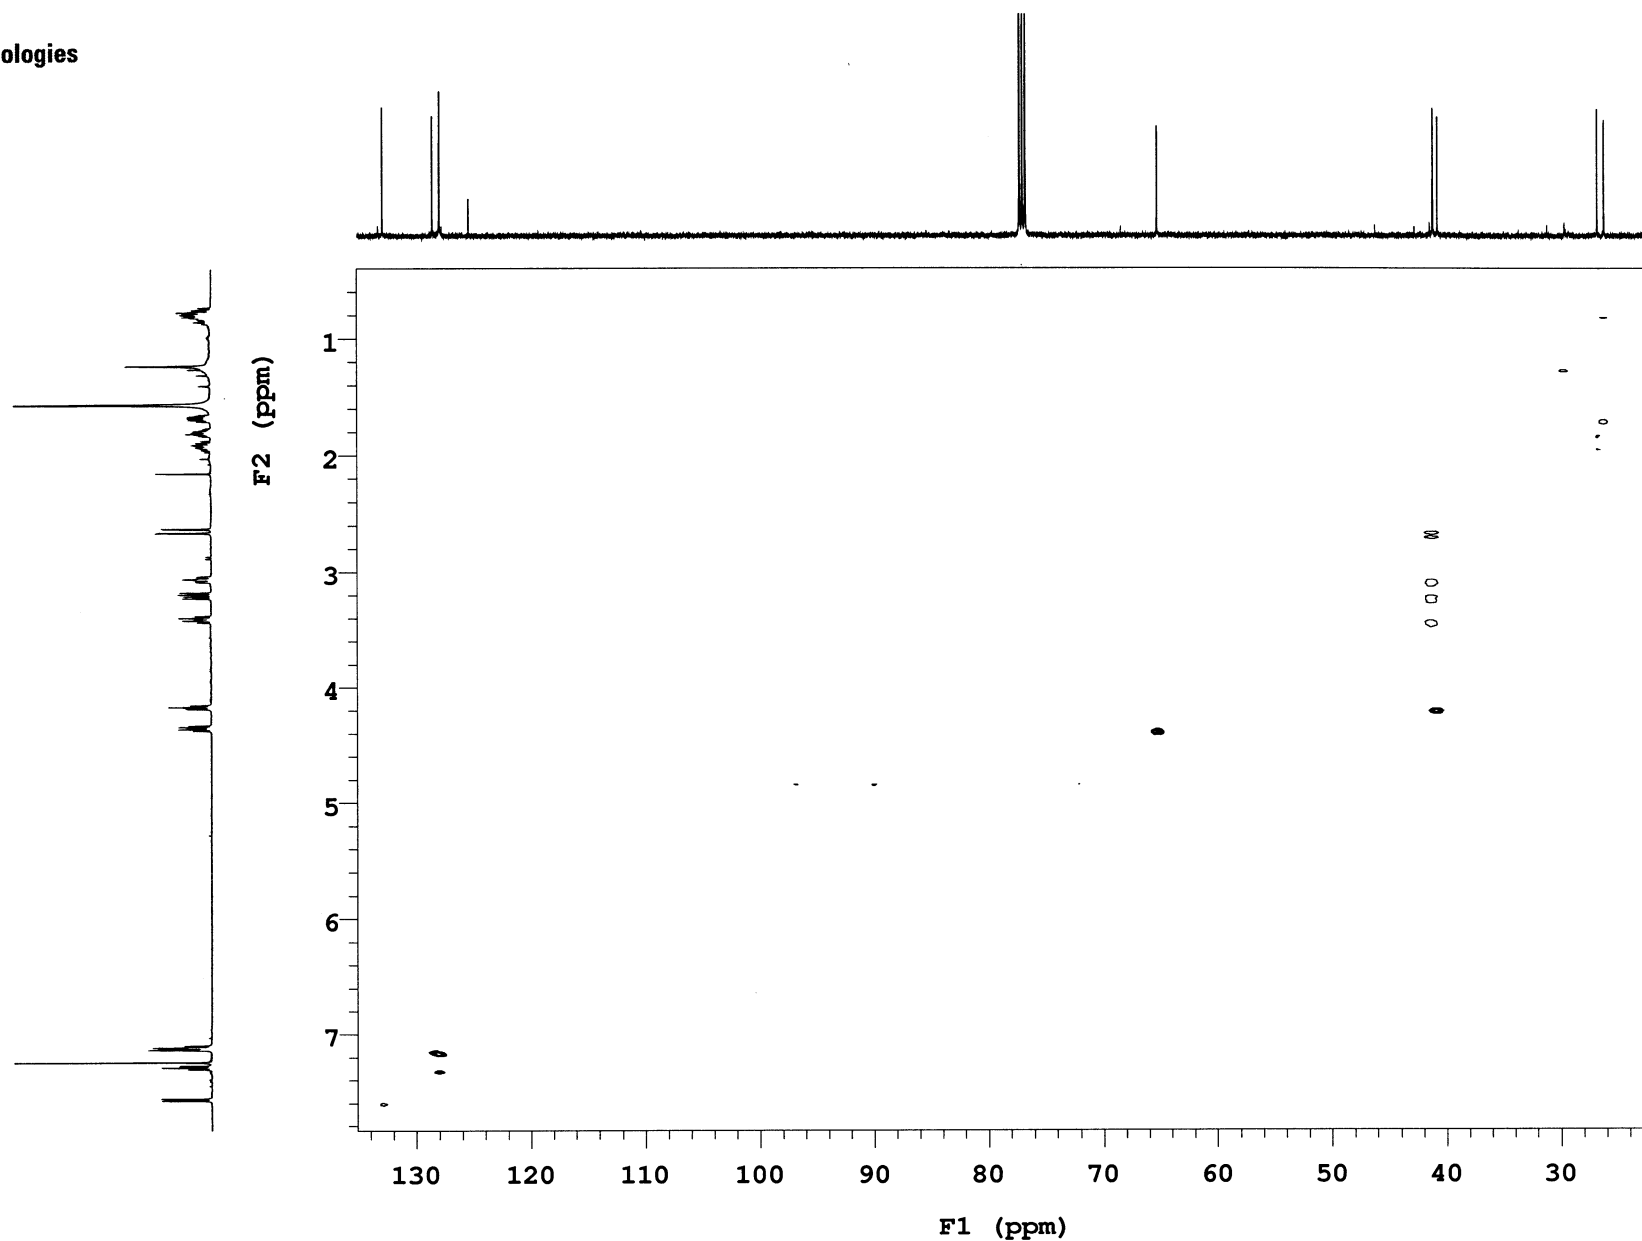

Fig S212. HSQC of compound anti-4f



LCH-02-406

Sample Name **LCH-02-406**  
Date collected **2015-06-24**Pulse sequence **gCOSY**  
Solvent **cdcl3**Temperature **26**  
Spectrometer **Agilent-NMR-inova500**Study owner **vnmr2**  
Operator **vnmr2**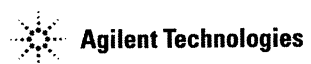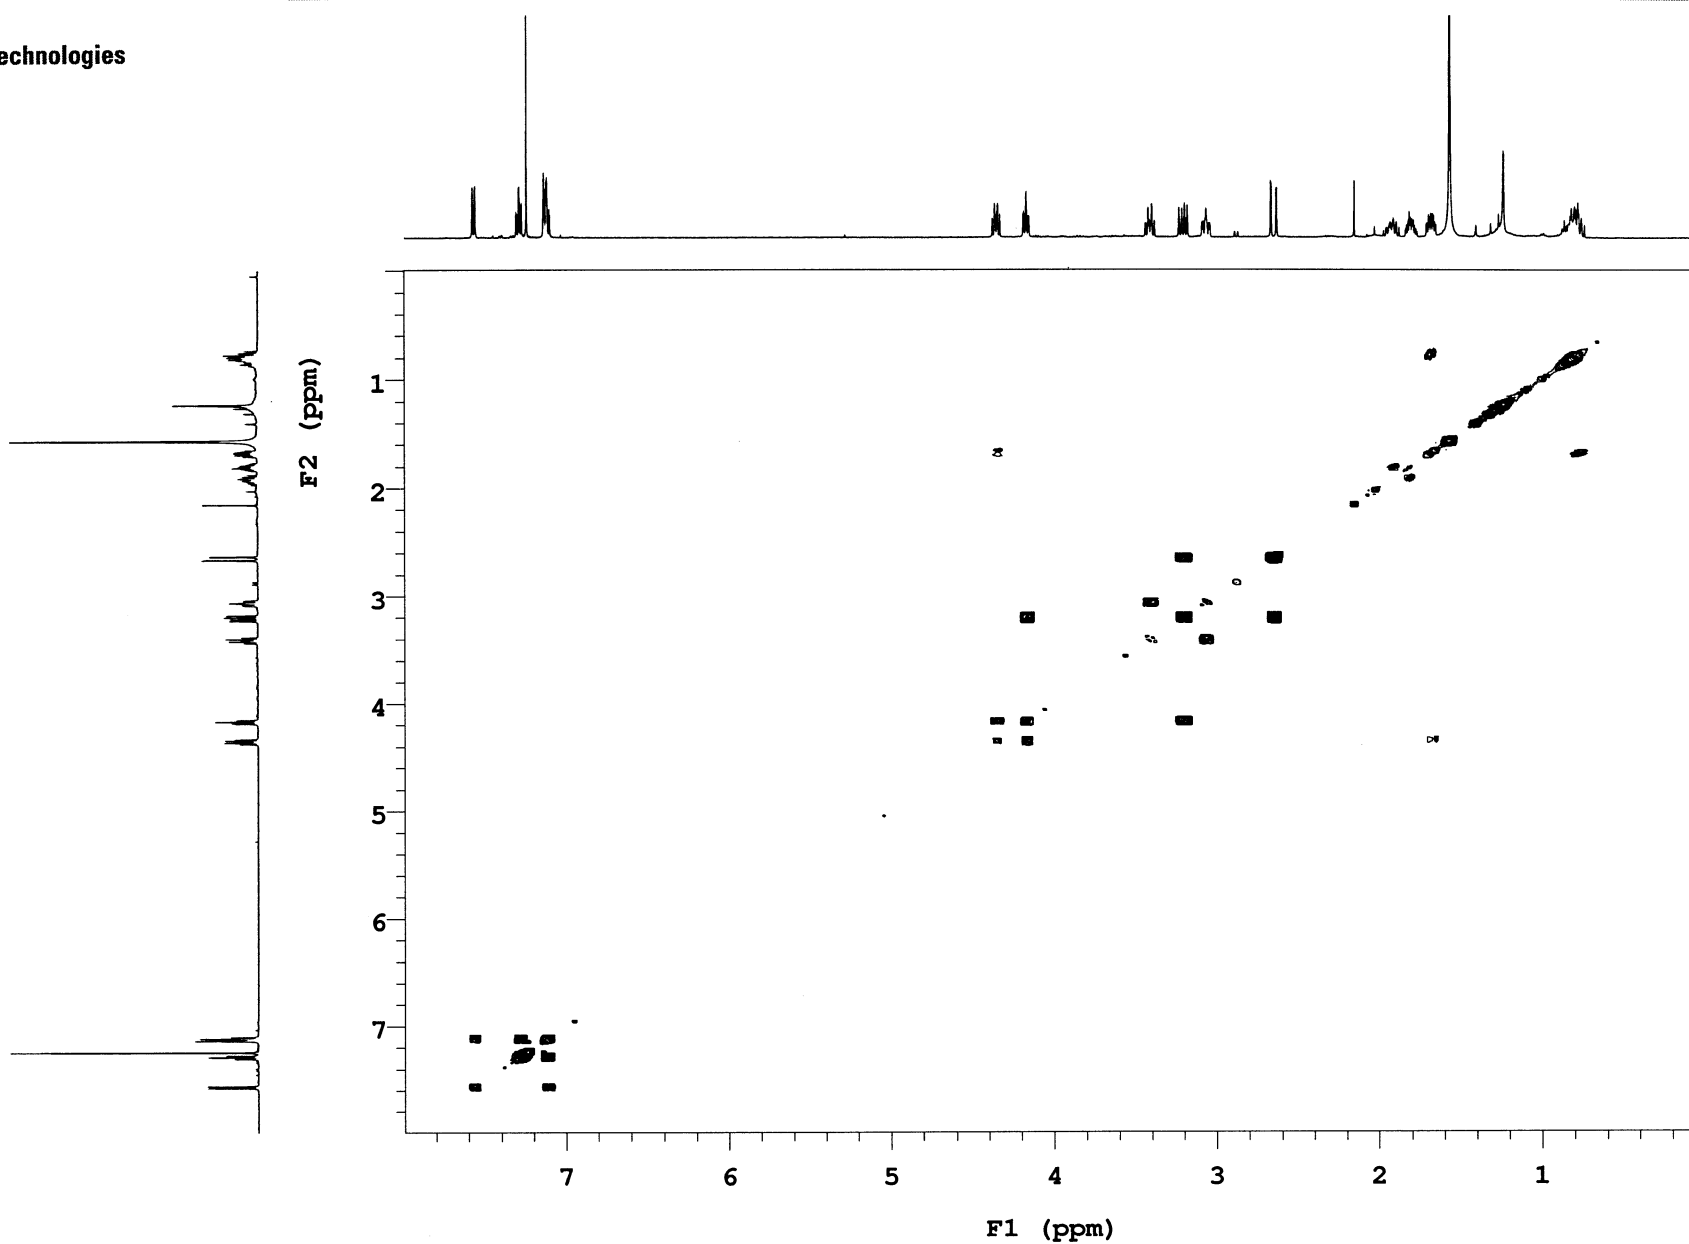

Fig S213. COSY of compound anti-4f

LCH-02-406

Sample Name **LCH-02-406**  
Date collected **2015-06-24**Pulse sequence **NOESY**  
Solvent **cdcl3**Temperature **26**  
Spectrometer **Agilent-NMR-inova500**Study owner **vnmr2**  
Operator **vnmr2**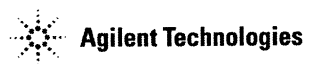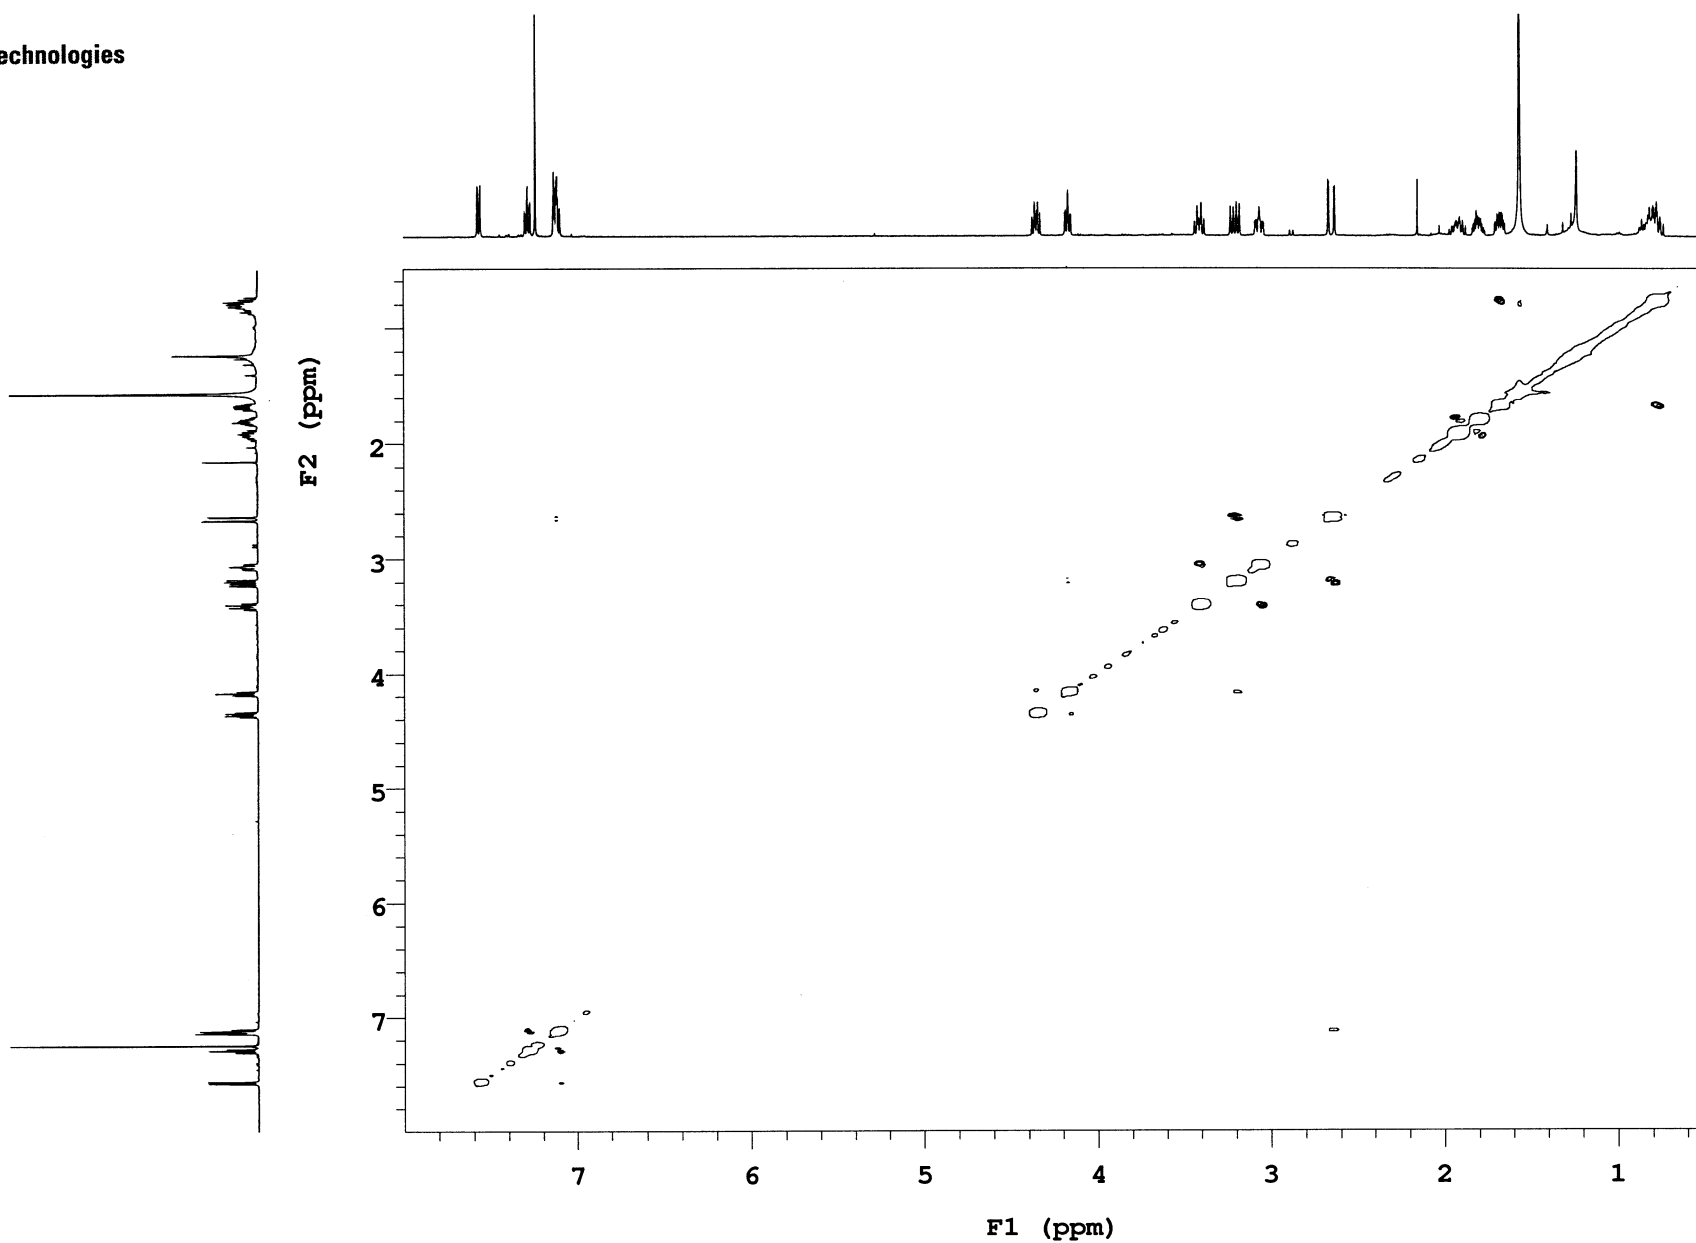

Fig S214. NOESY of compound anti-4f

Sample Name **LCH-02-379**  
Date collected **2015-10-30**Pulse sequence **PROTON**  
Solvent **cdcl3**Temperature **25**  
Spectrometer **Agilent-NMR-inova500**Study owner **vnmr2**  
Operator **vnmr2**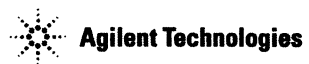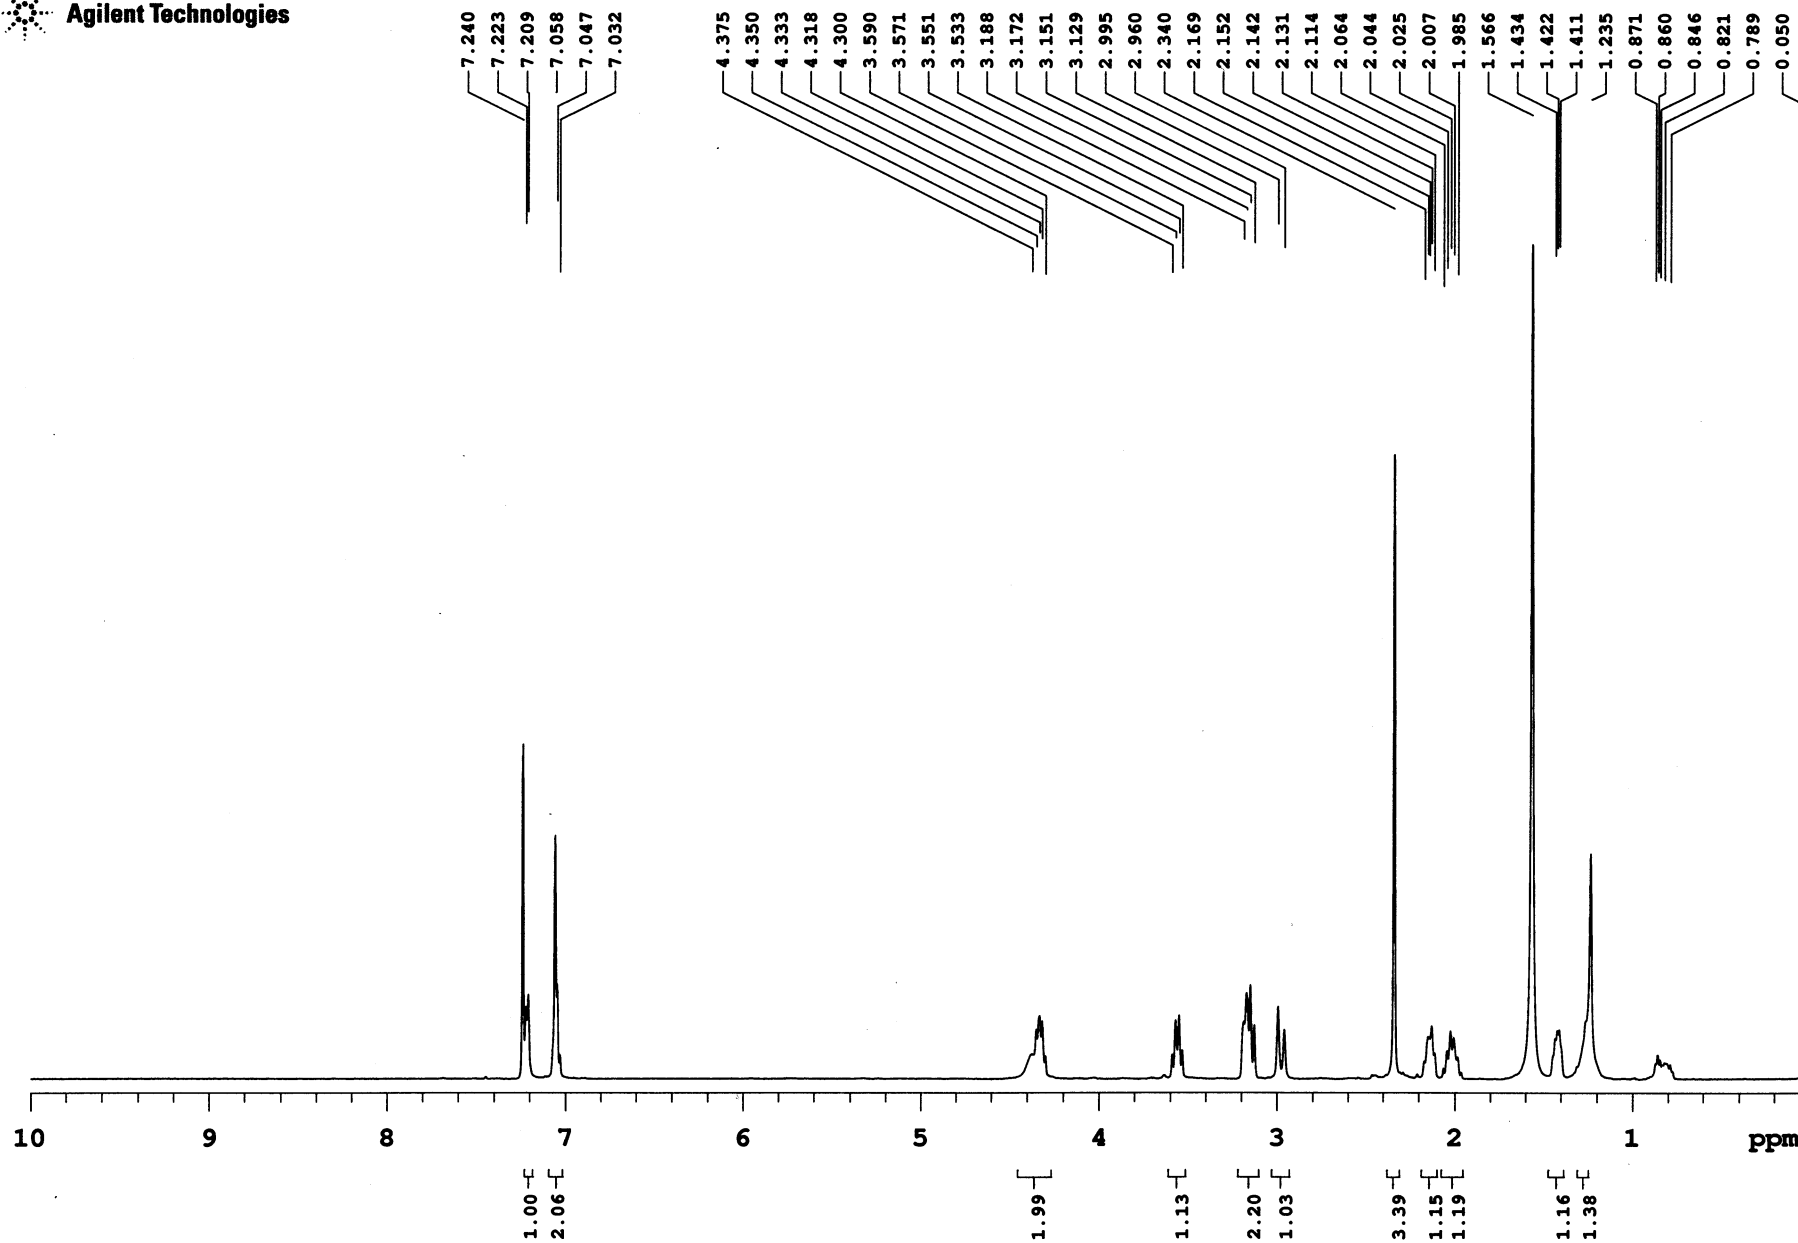

LCH-02-379

exp81 s2pu1

```
SAMPLE          DEC. & VT
date Mar 12 2015 dfrq      499.833
solvent cdc13          dn      H1
file      exp          dpwr     44
ACQUISITION      dof       0
sfrq      125.696     dm       yyy
tn         C13        dmm      w
at         1.000      dmf      8868
np         60332     dseq
sw         30165.9   dres      1.0
fb         not used homo      n
bs         4         PROCESSING
tpwr       59       lb        1.00
pw         4.8      wtfile
d1         1.000    proc
tof        1883.7   fn        131072
nt         6000     math
ct         6000
alock      y       werr      react
gain      not used wexp      procplot
FLAGS      n       wbs      testsn
il         n       wnt      wft
in         n
dp         y
hs         nn
DISPLAY
sp        -1257.2
wp        28906.5
vs        400
sc        0
wc        210
hzmm      137.65
is        33.57
rfl       10969.8
rfp       9677.5
th        6
ins       100.000
nm cdc ph
```

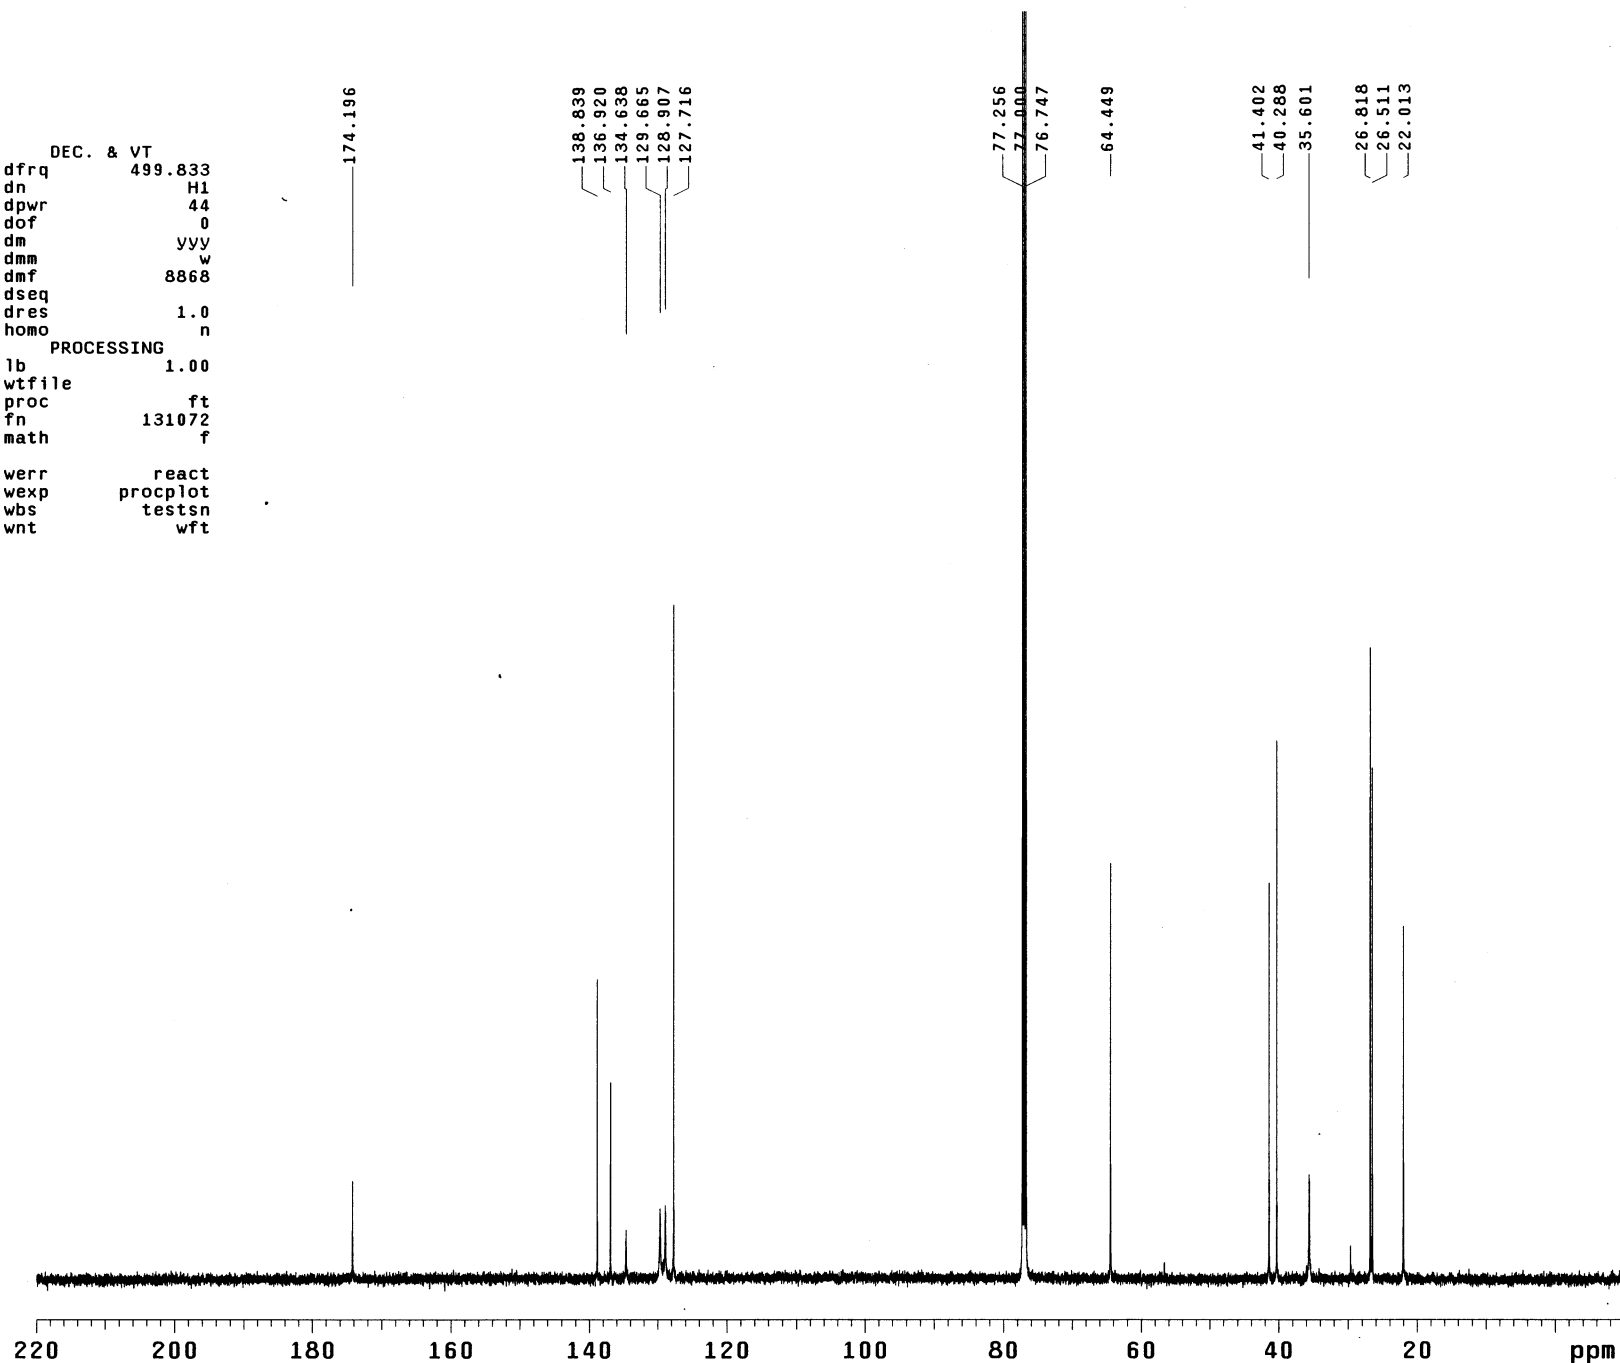Fig S216. <sup>13</sup>C NMR (CDCl<sub>3</sub>, 125 MHz) of compound anti-4g

Fig S217. DEPT of compound anti-4g

LCH-02-379

exp82 DEPT

|             |             |               |                    |      |
|-------------|-------------|---------------|--------------------|------|
| SAMPLE      |             | DEPT          | ACQUISITION ARRAYS |      |
| date        | Mar 12 2015 | j1xh 140.0    | array              | mult |
| solvent     | cdc13       | mult          | arrayed            | 3    |
| sample      | undefined   | SPECIAL       |                    |      |
| ACQUISITION |             | temp not used | 1                  | mult |
| sw          | 30165.9     | gain          | 34                 | 0.5  |
| at          | 1.000       | spin          | 0                  | 1    |
| np          | 60332       | PROCESSING    | 3                  | 1.5  |
| bs          | -4          | lb            | 1.00               |      |
| ss          | -4          | fn            | 131072             |      |
| d1          | 1.000       | SPECTRUM      |                    |      |
| nt          | 3000        | wp            | 28906.5            |      |
| ct          | 3000        | sp            | -1257.2            |      |
| TRANSMITTER |             | rp            | 20.8               |      |
| tn          | C13         | lp            | 219.1              |      |
| tof         | 1883.7      | ai            | cdc ph             |      |
| tpwr        | 59          | REFERENCE     |                    |      |
| pw          | 14.700      | rfl           | 1291.8             |      |
| DECOUPLER   |             | rfp           | 0                  |      |
| dn          | H1          | PLOT          |                    |      |
| dof         | 0           | wc            | 210                |      |
| dpwr        | 44          | sc            | 0                  |      |
| dm          | nny         | vs            | 1000               |      |
| dmm         | ccw         | hzmm          | 137.65             |      |
| dmf         | 8868        | th            | 7                  |      |
| pp1v1       | 59          |               |                    |      |
| pp          | 21.200      |               |                    |      |

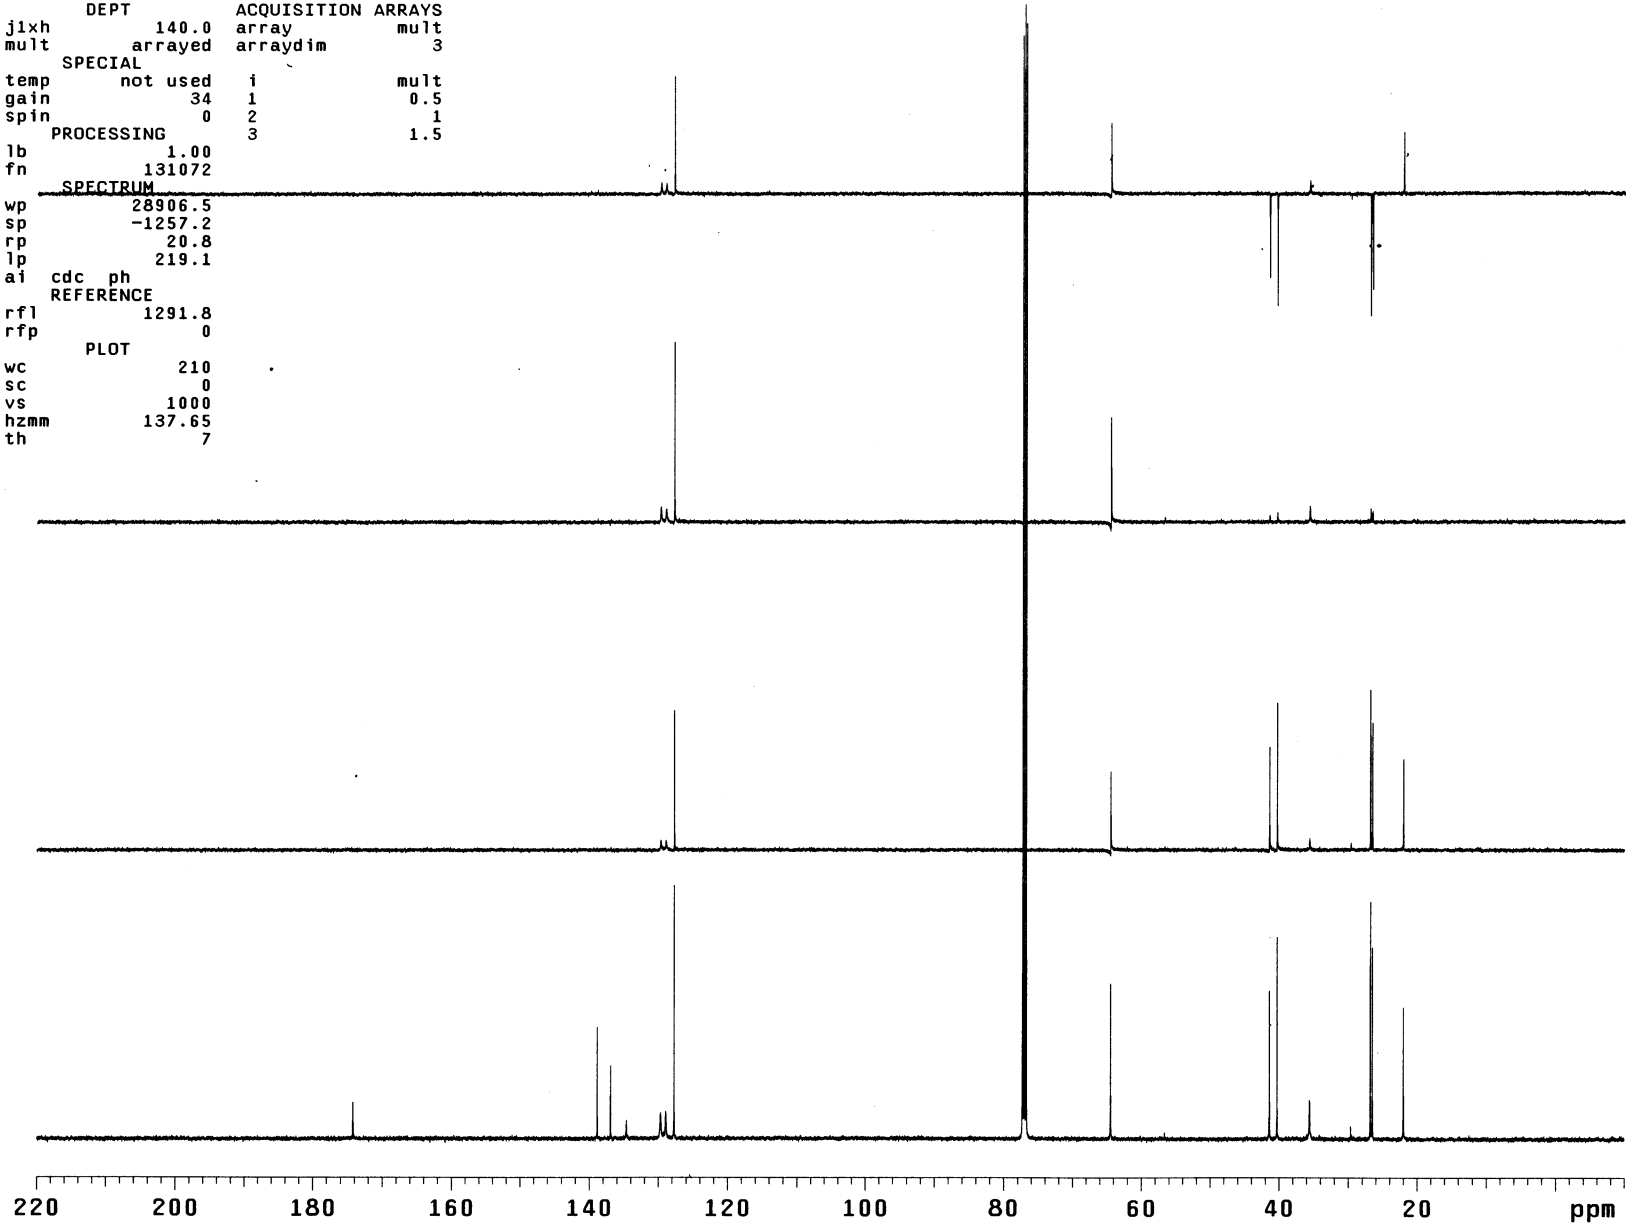

Sample Name LCH-02-379  
Date collected 2015-03-12Pulse sequence gHSQC  
Solvent cdcl3Temperature 130  
Spectrometer --Study owner vnmr2  
Operator vnmr2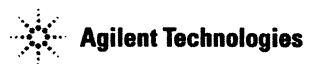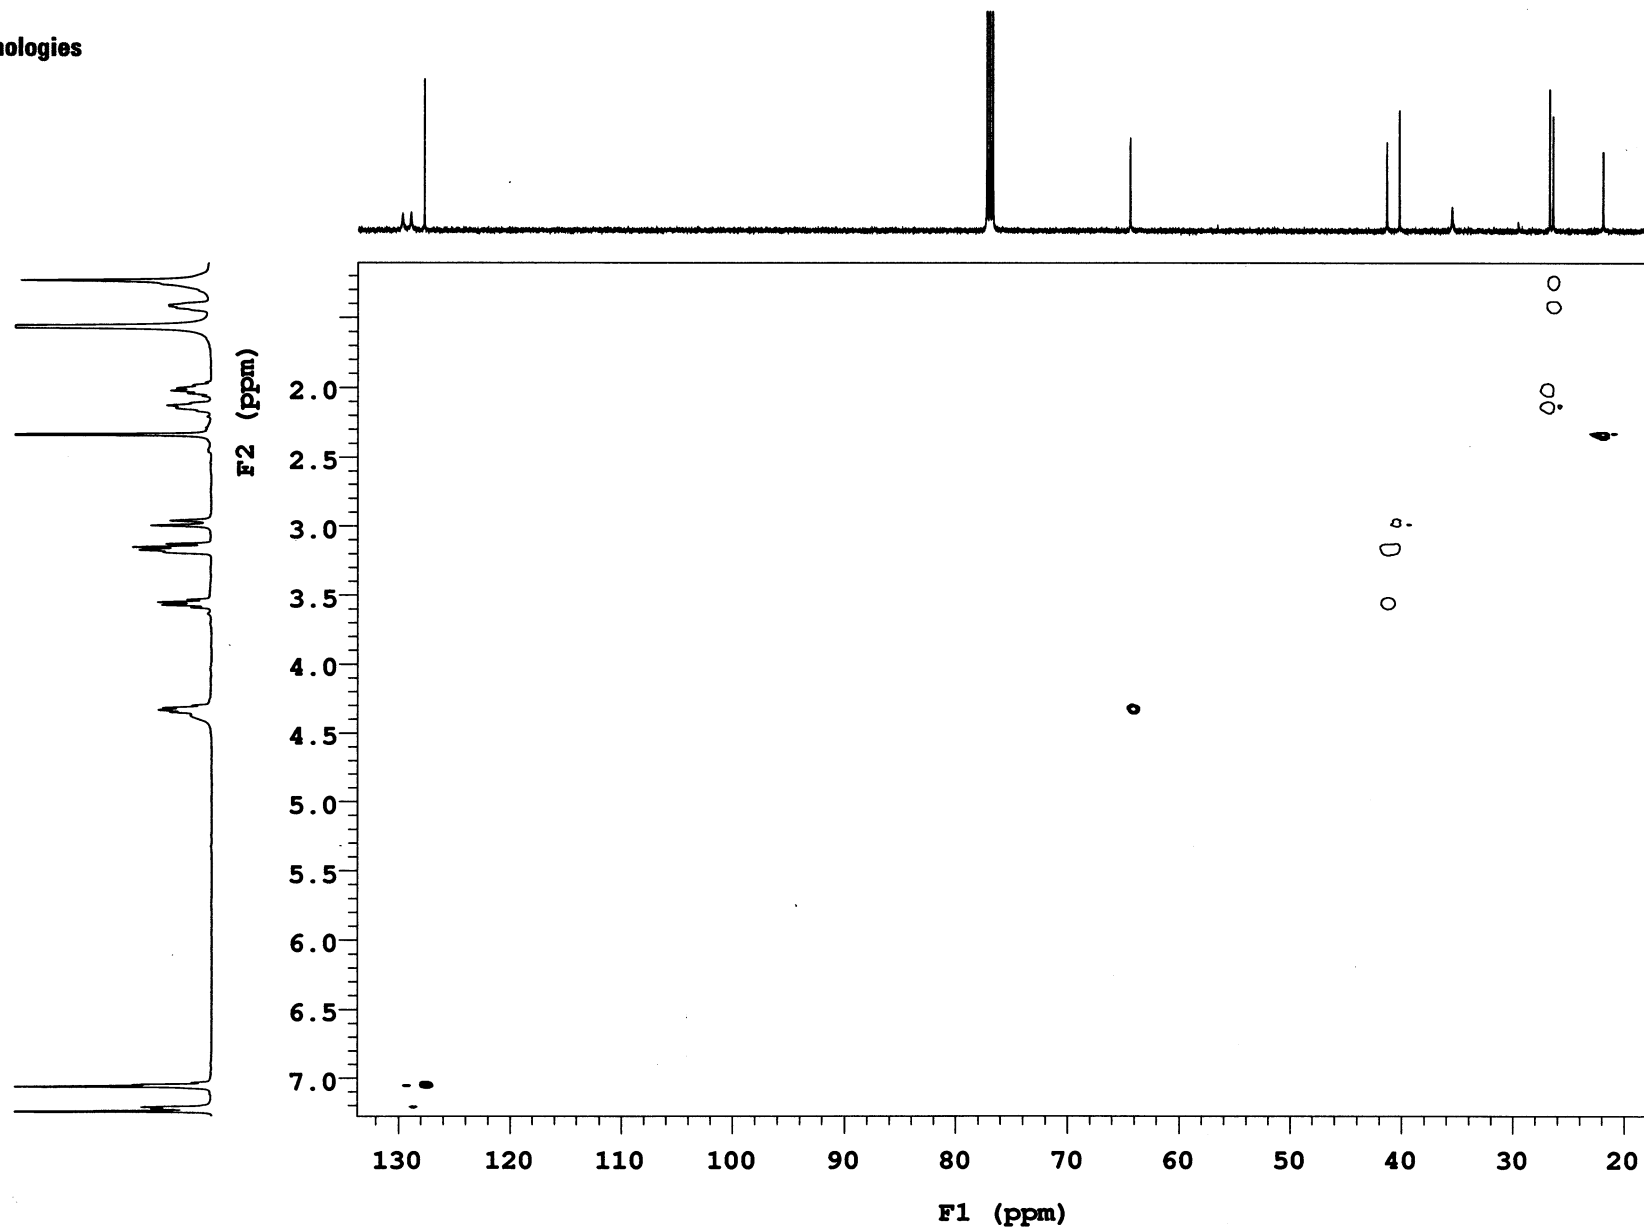

Sample Name LCH-02-379  
Date collected 2015-03-12

Pulse sequence gCOSY  
Solvent cdcl3

Temperature 130  
Spectrometer --

Study owner vnmr2  
Operator vnmr2

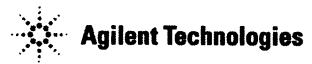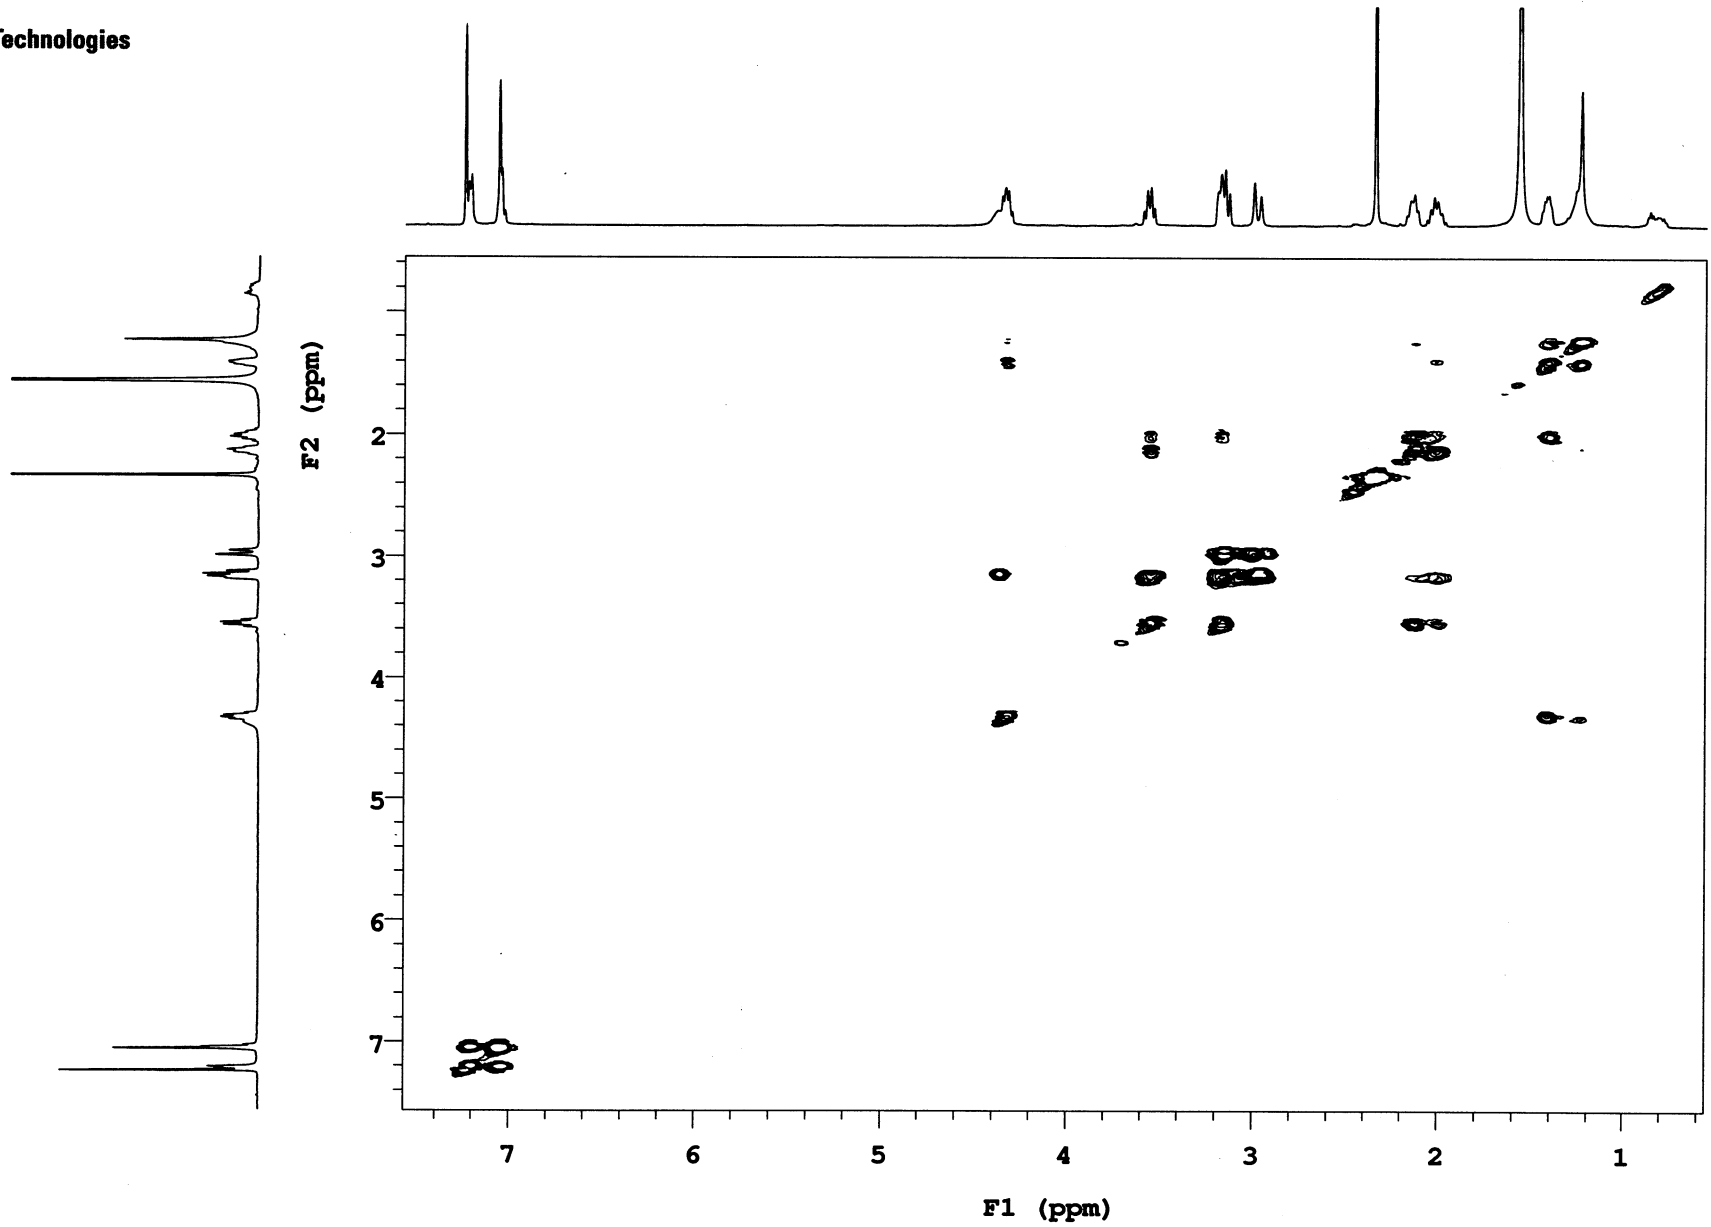

Fig S219. COSY of compound anti-4g

Sample Name LCH-02-379  
Date collected 2015-03-12Pulse sequence NOESY  
Solvent cdcl3Temperature 130  
Spectrometer —Study owner vnmr2  
Operator vnmr2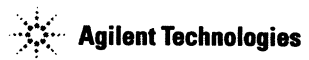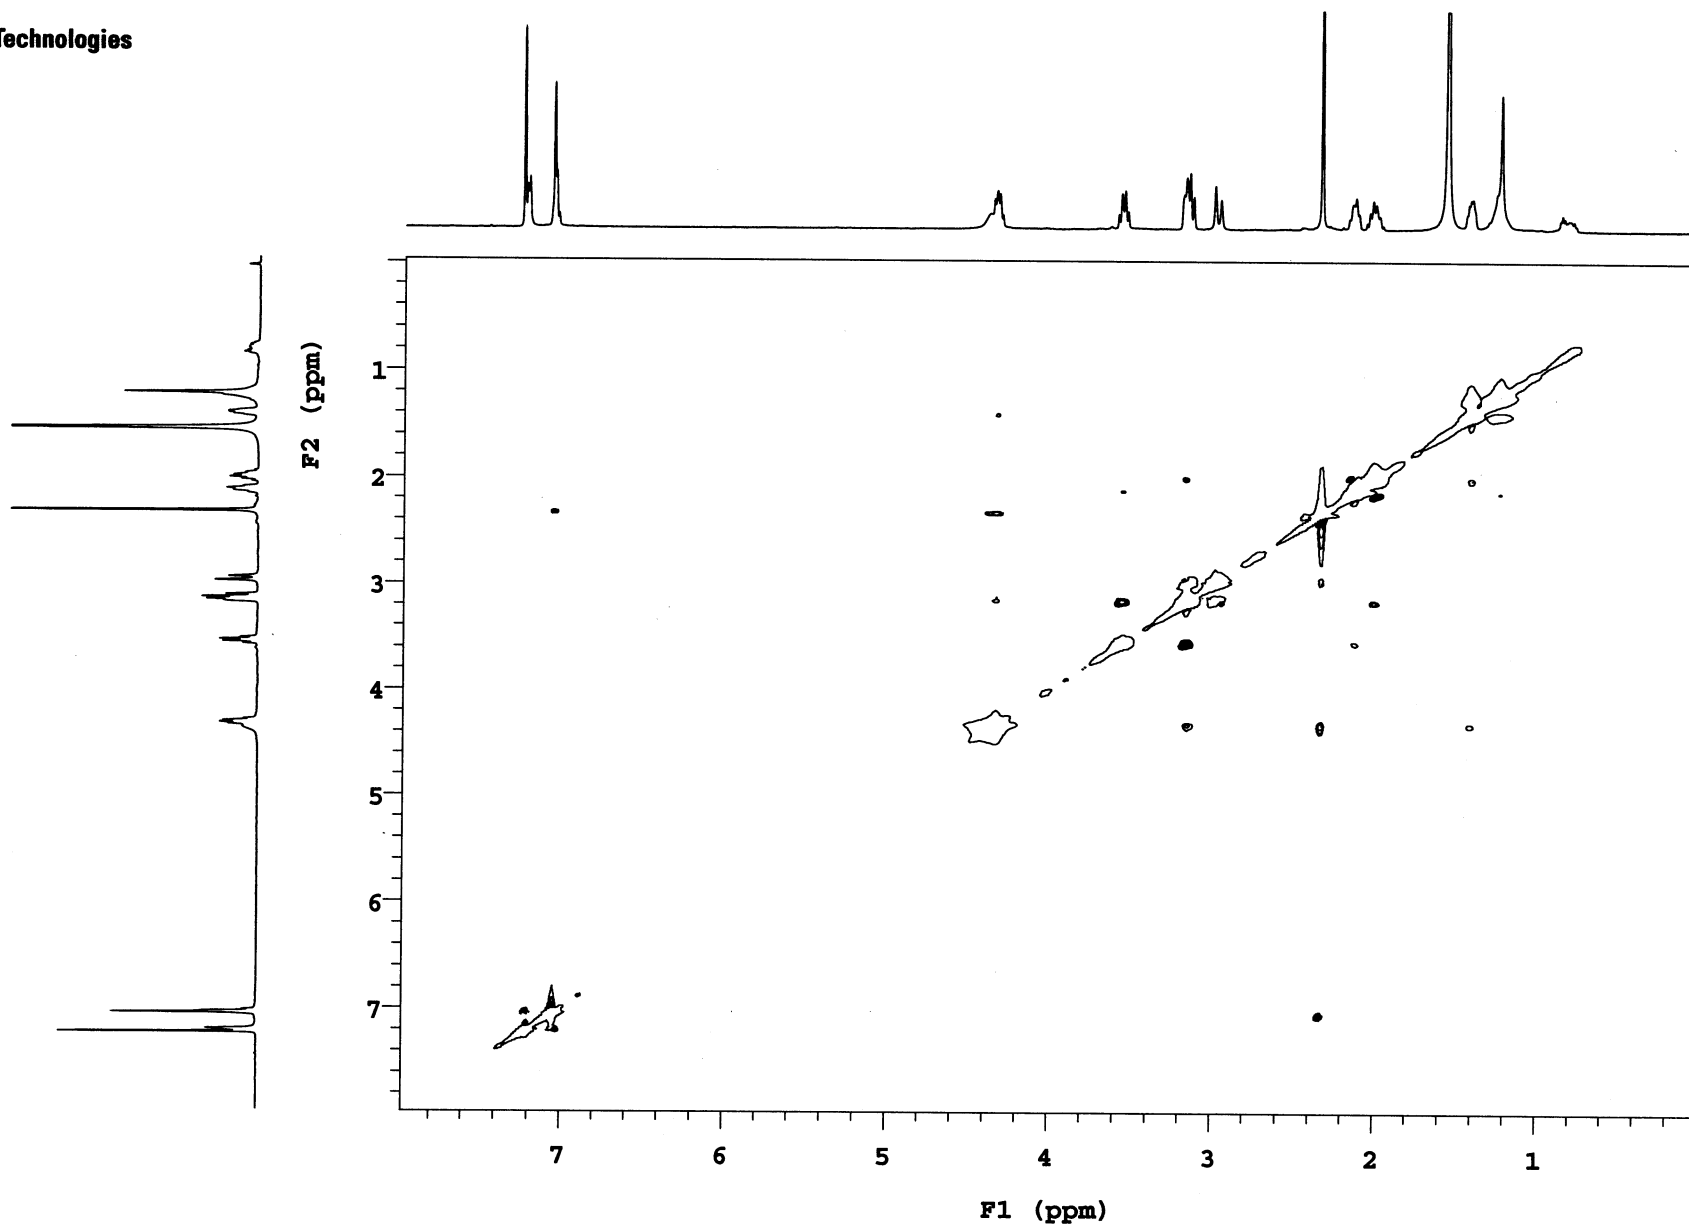

Fig S220. NOESY of compound anti-4g



LCH-02-399

Sample Name **LCH-02-399**  
Date collected **2015-06-13**Pulse sequence **PROTON**  
Solvent **cdcl3**Temperature **25**  
Spectrometer **Agilent-NMR-inova500**Study owner **vnmr2**  
Operator **vnmr2**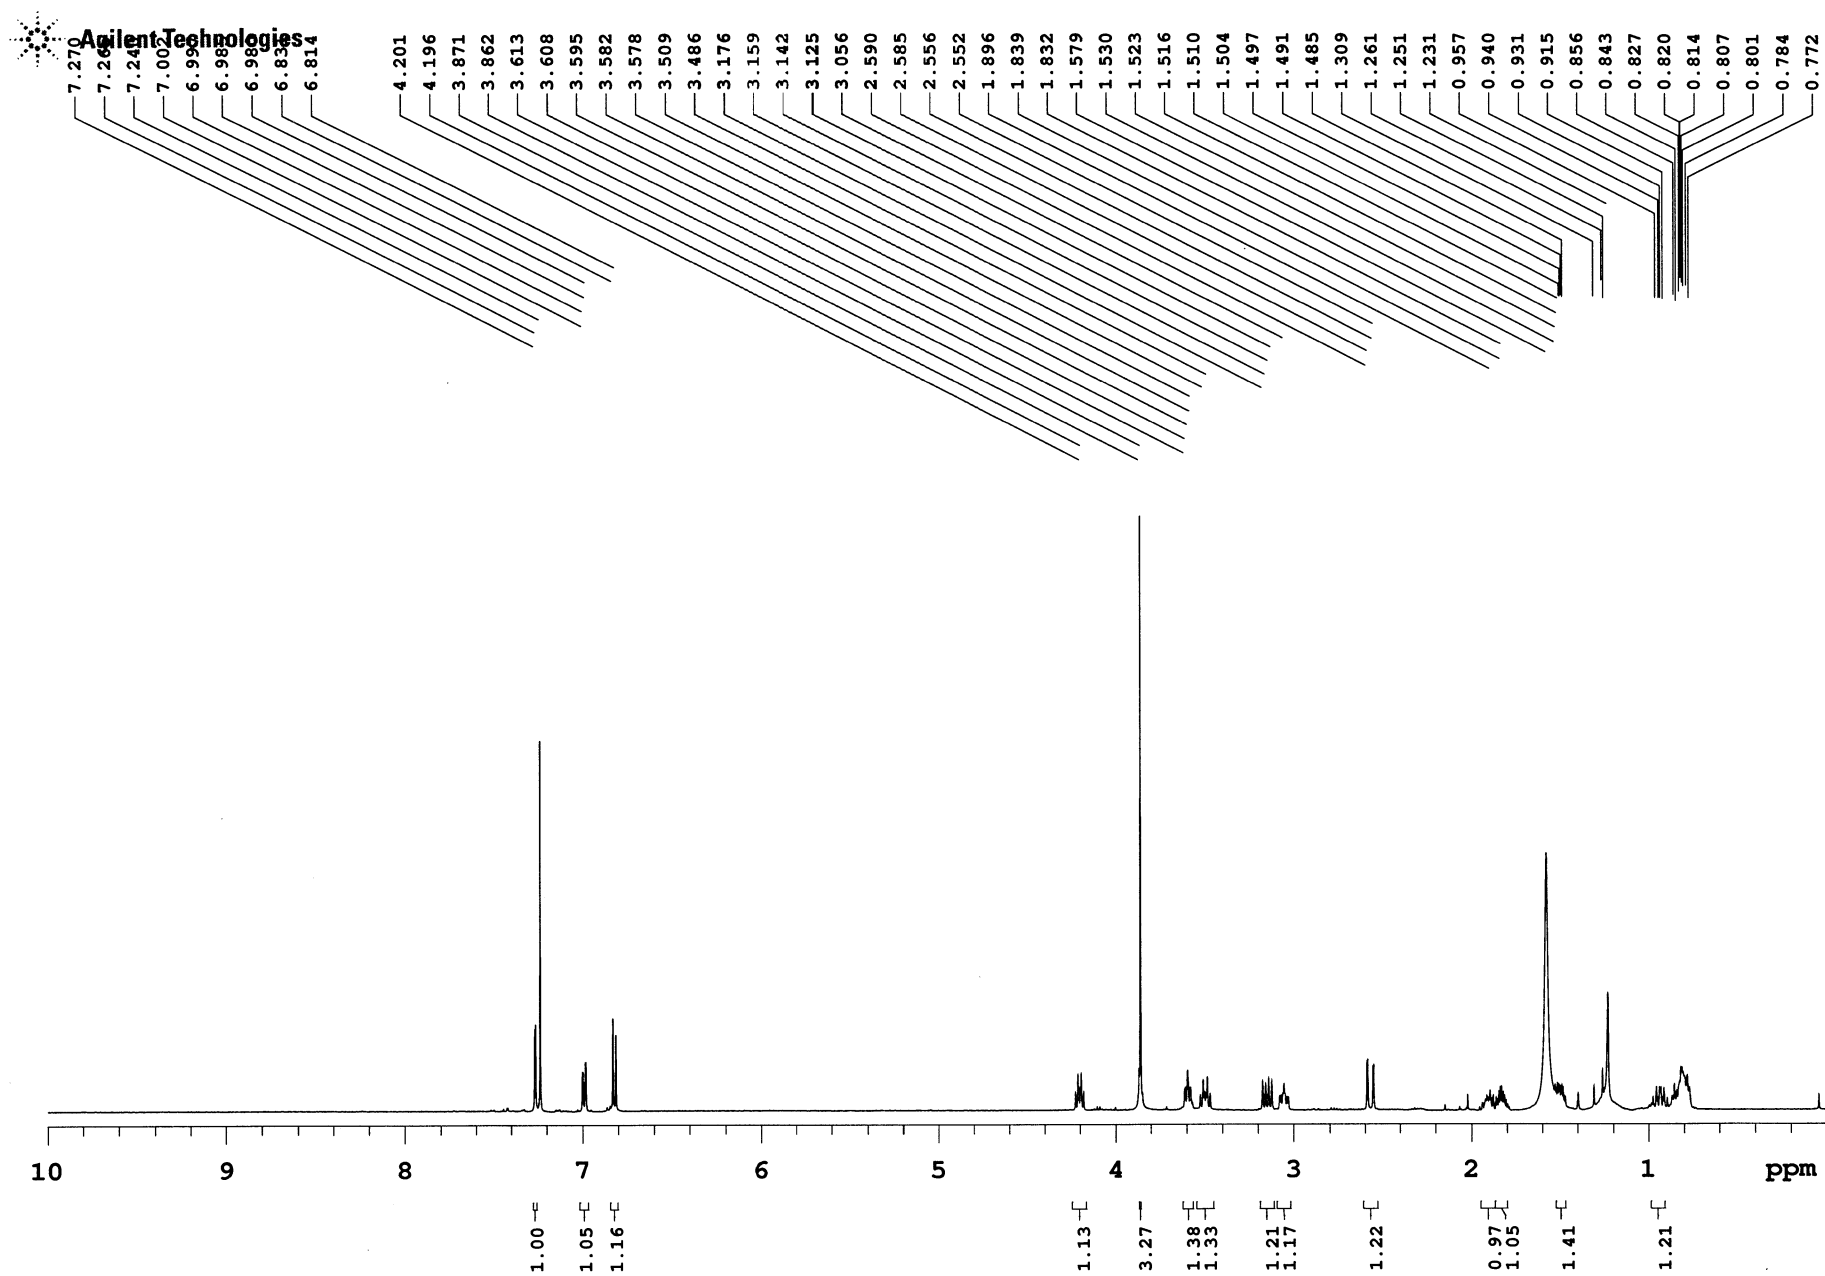

Sample Name **LCH-02-399**  
Date collected **2015-06-13**Pulse sequence **CARBON**  
Solvent **cdcl3**Temperature **25**  
Spectrometer **Agilent-NMR-inova500**Study owner **vnmr2**  
Operator **vnmr2**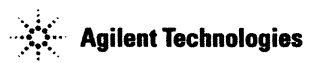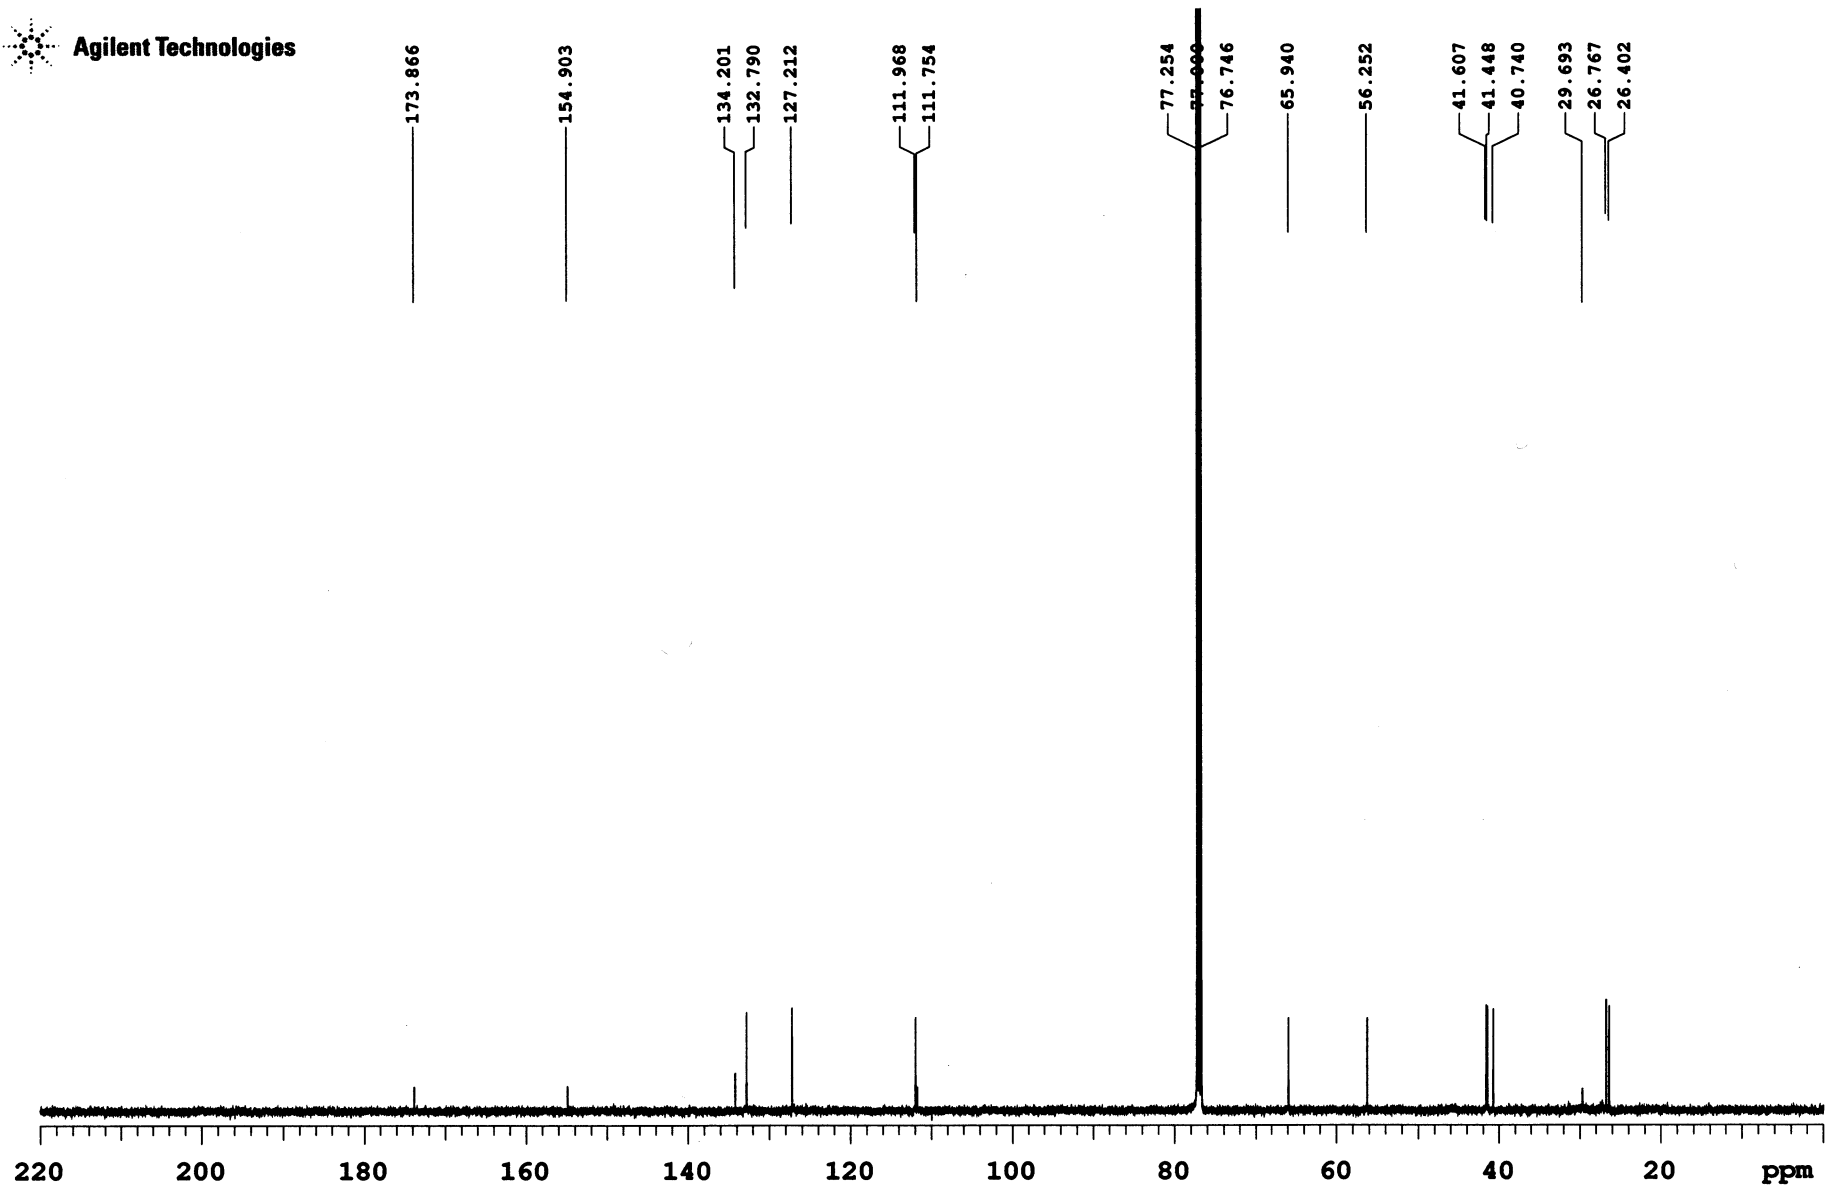Fig S222. <sup>13</sup>C NMR (CDCl<sub>3</sub>, 125 MHz) of compound anti-4h

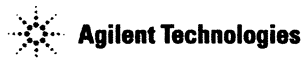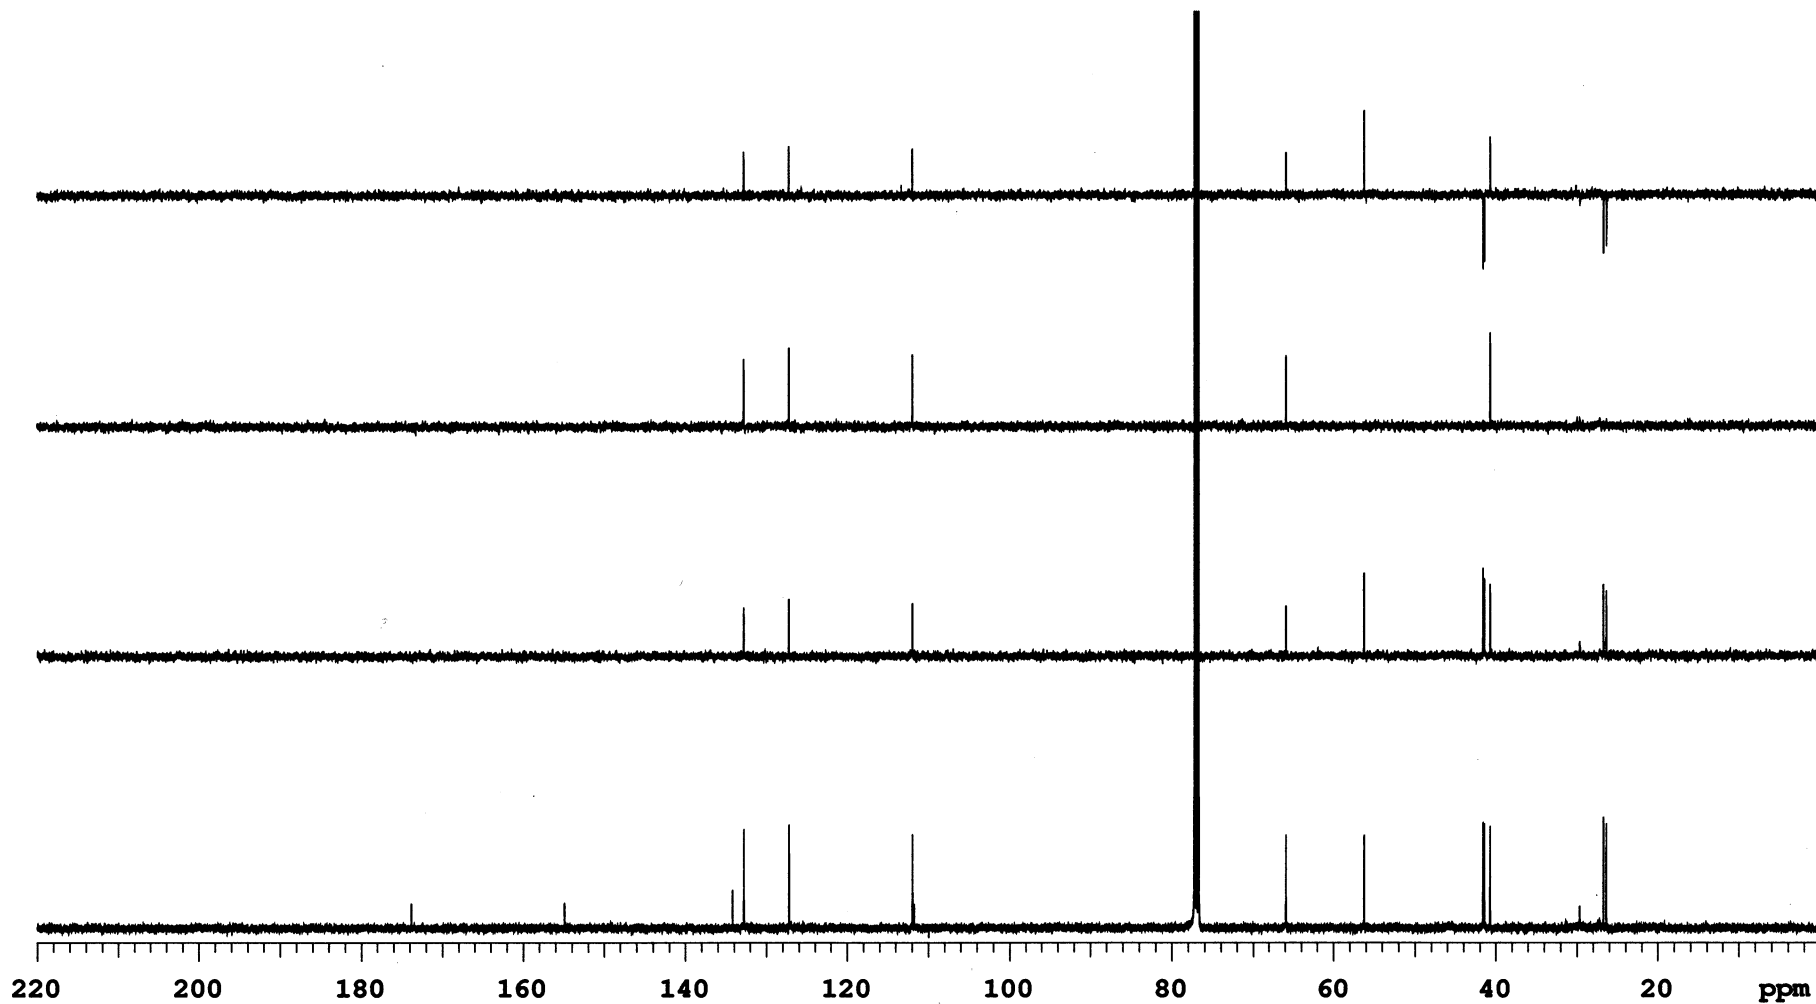

Fig S223. DEPT of compound anti-4h

LCH-02-399

Sample Name **LCH-02-399**  
Date collected **2015-06-03**Pulse sequence **gHSQC**  
Solvent **cdcl3**Temperature **25**  
Spectrometer **Agilent-NMR-inova500**Study owner **vnmr2**  
Operator **vnmr2**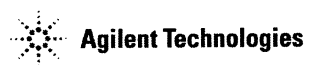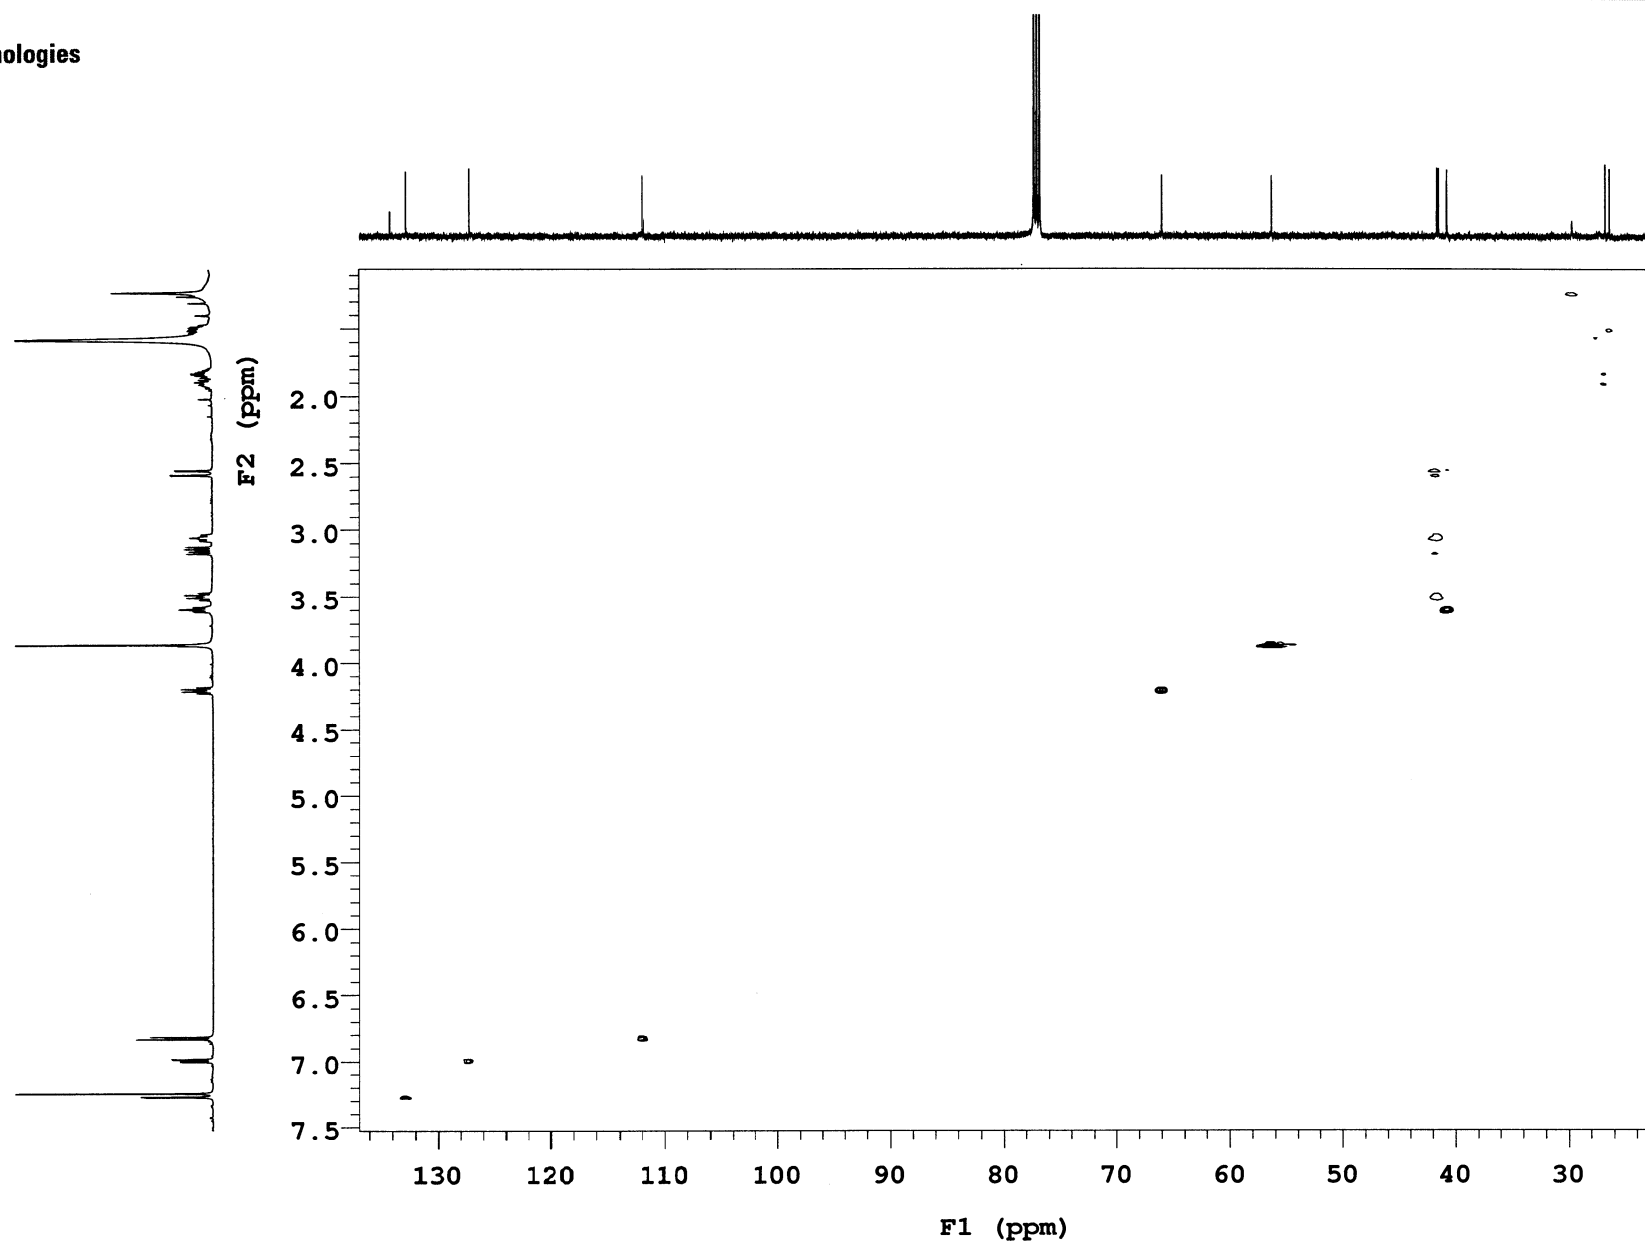

Fig S224. HSQC of compound anti-4h

LCH-02-399

Sample Name **LCH-02-399**  
Date collected **2015-06-13**Pulse sequence **gCOSY**  
Solvent **cdcl3**Temperature **25**  
Spectrometer **Agilent-NMR-inova500**Study owner **vnmr2**  
Operator **vnmr2**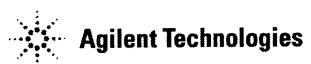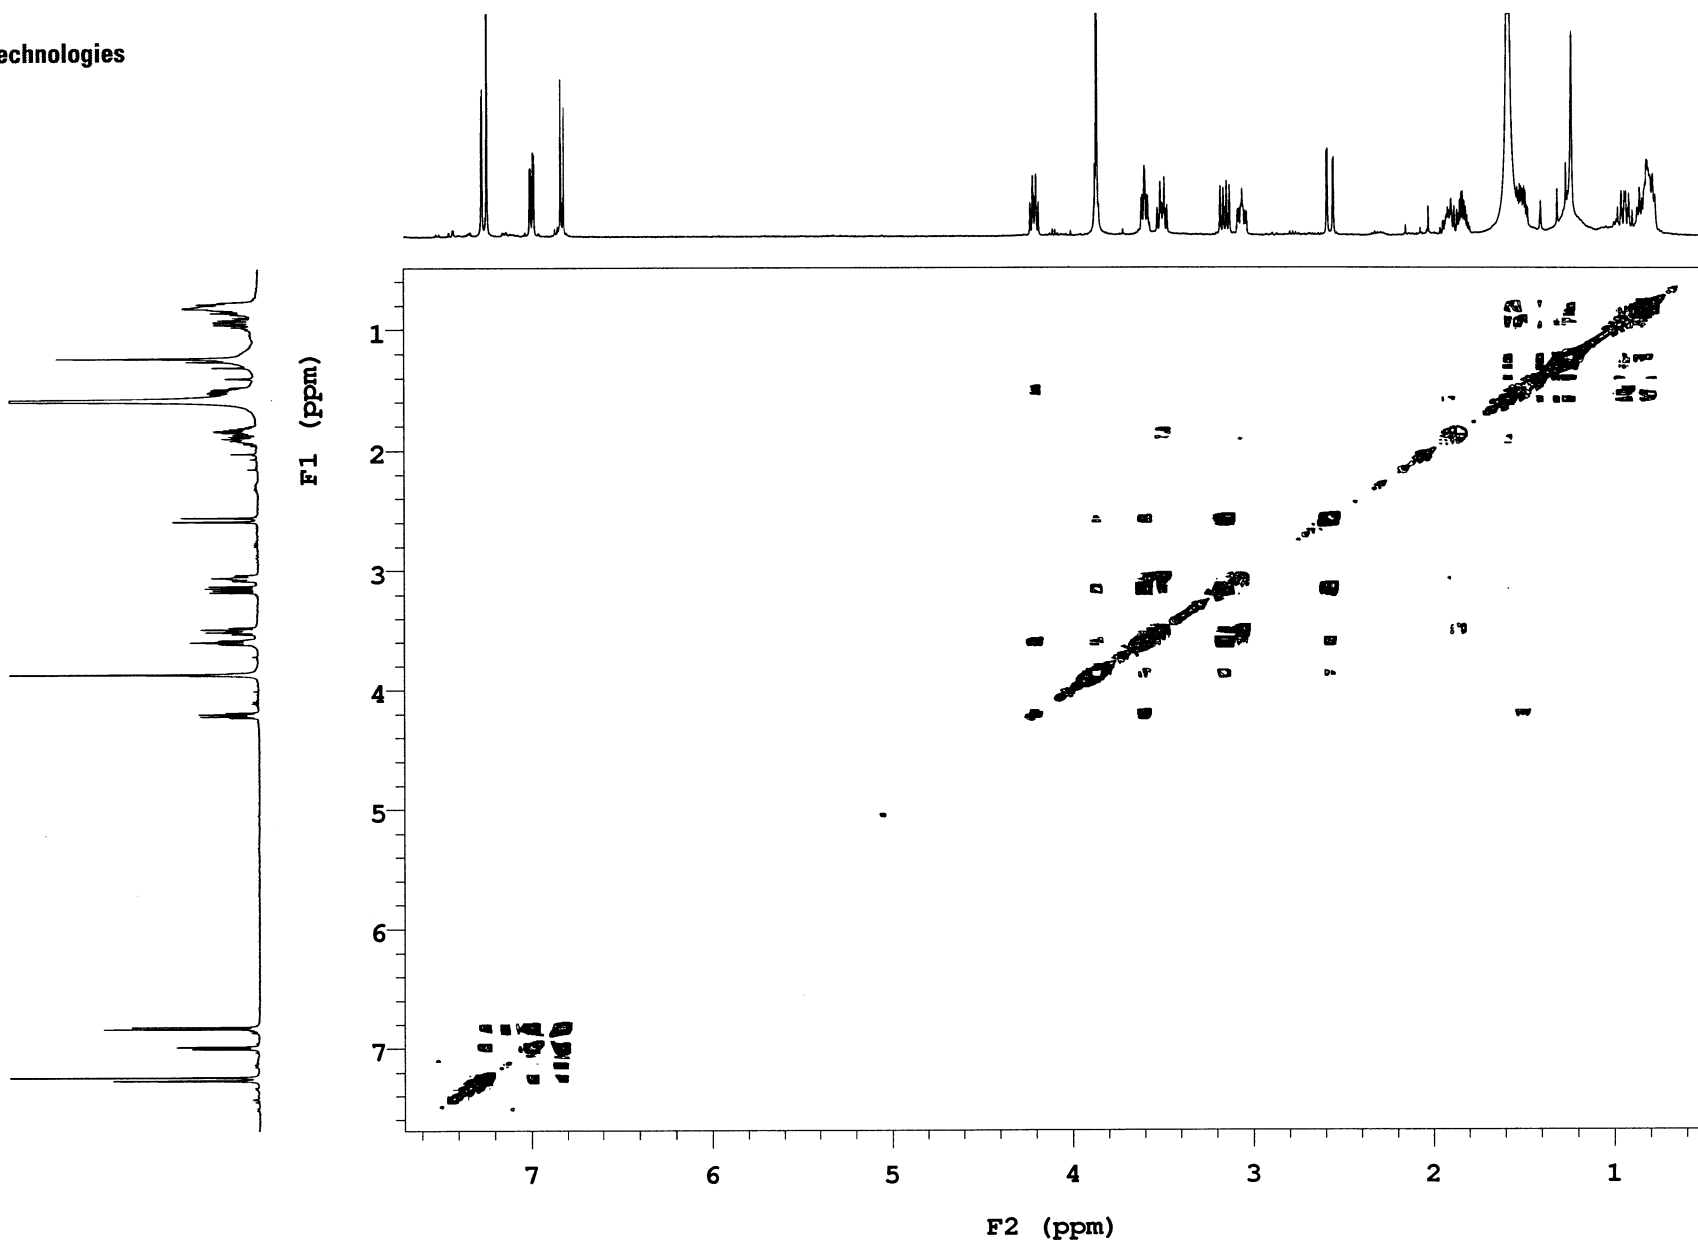

Fig S225. COSY of compound anti-4h

LCH-02-399

Sample Name **LCH-02-399**  
Date collected **2015-06-13**Pulse sequence **NOESY**  
Solvent **cdcl3**Temperature **25**  
Spectrometer **Agilent-NMR-inova500**Study owner **vnmr2**  
Operator **vnmr2**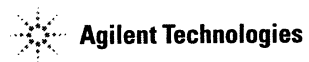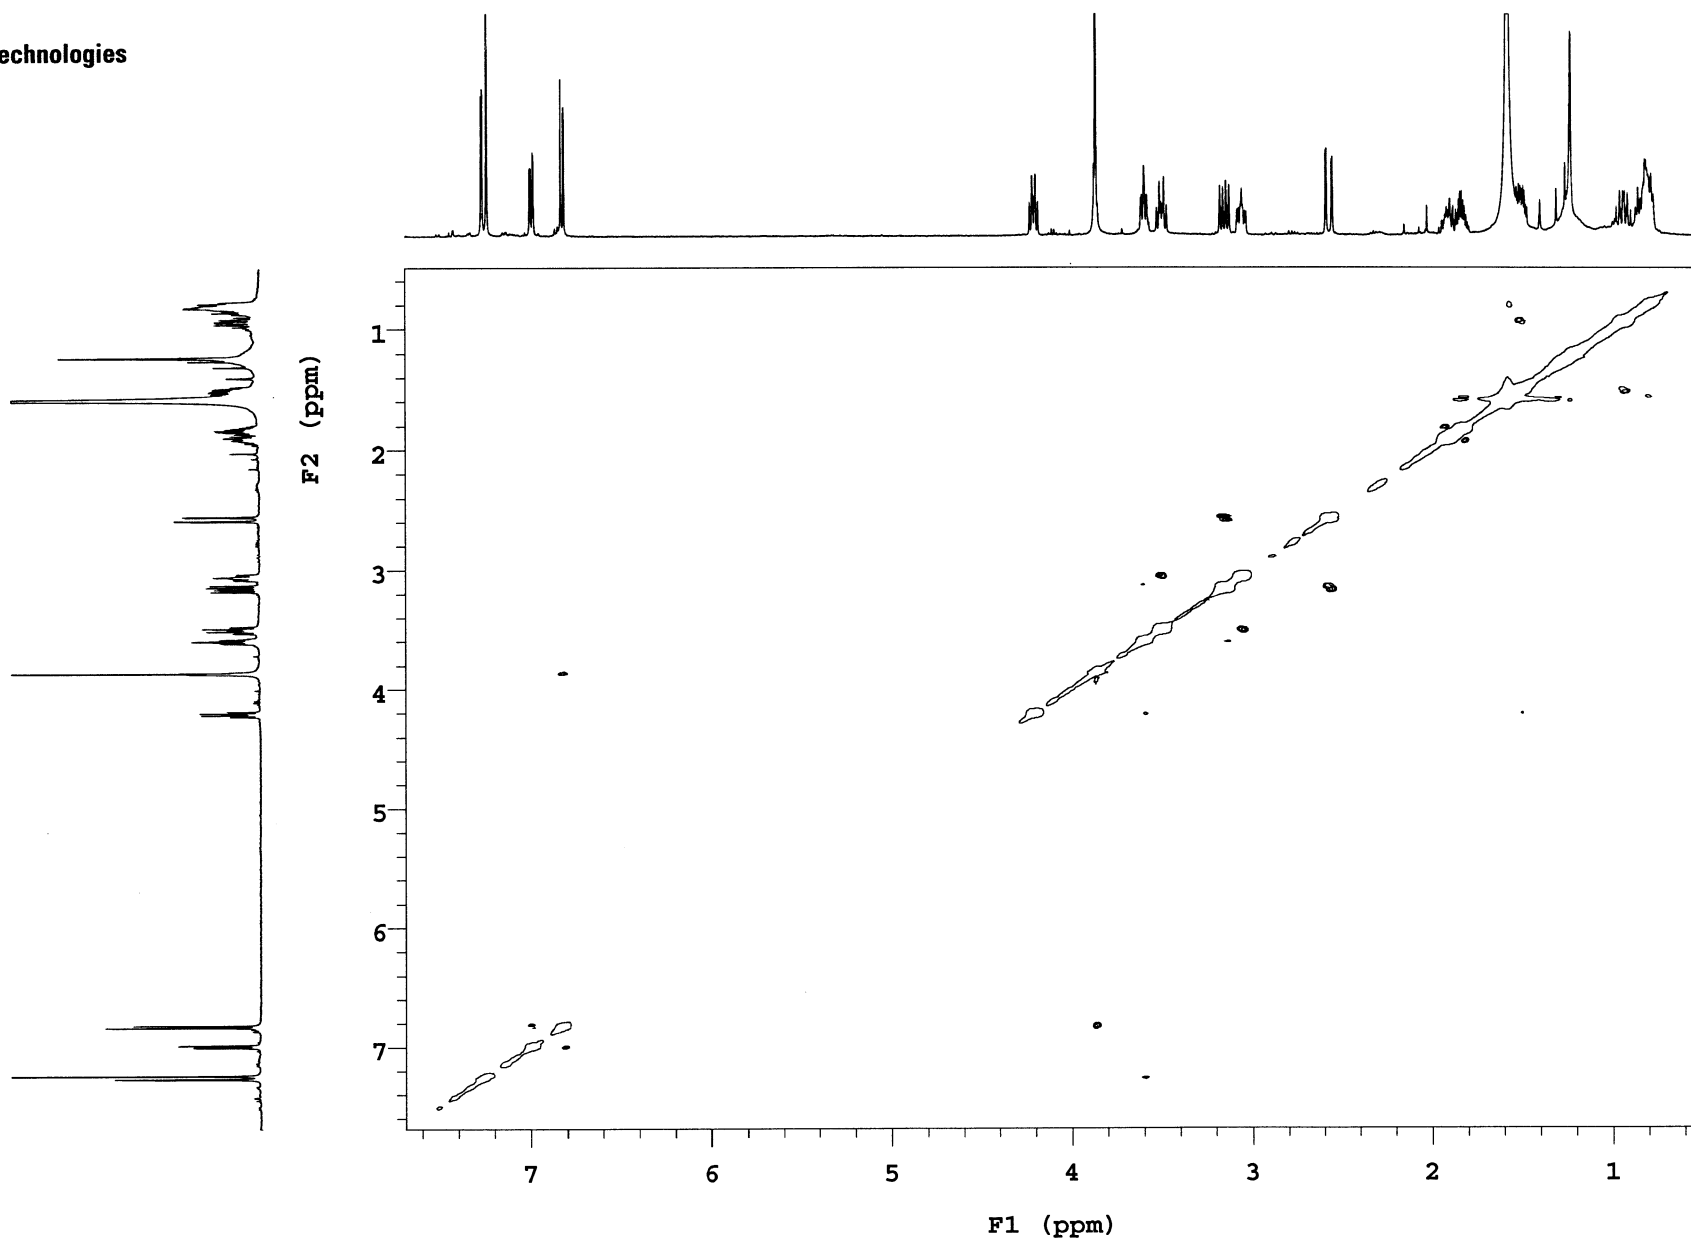

Sample Name **LCH-02-407**  
Date collected **2015-05-06**Pulse sequence **PROTON**  
Solvent **cdcl3**Temperature **25**  
Spectrometer **Agilent-NMR-inova500**Study owner **vnmr2**  
Operator **vnmr2**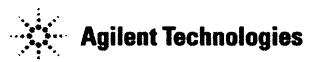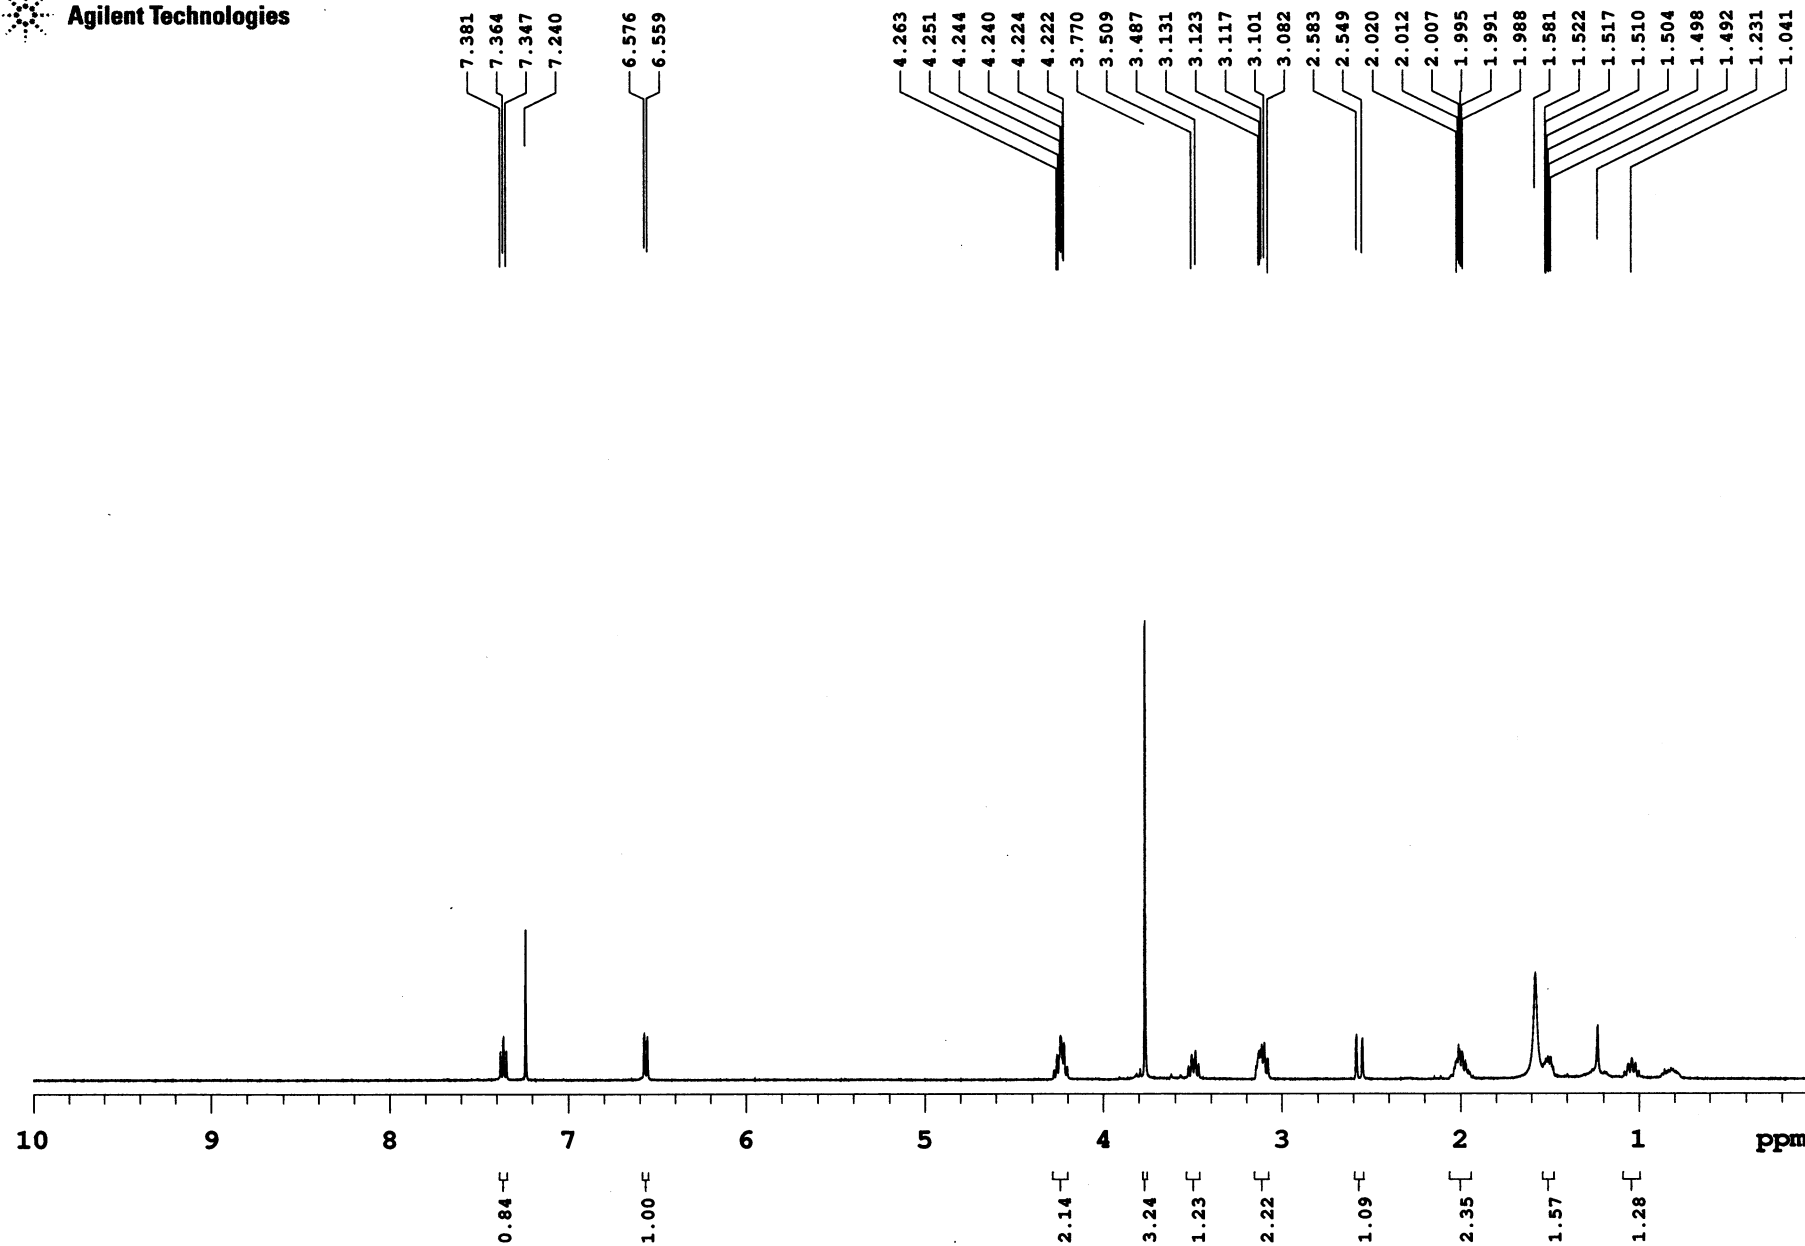

Sample Name **LCH-02-407**  
Date collected **2015-05-06**Pulse sequence **CARBON**  
Solvent **cdcl3**Temperature **25**  
Spectrometer **Agilent-NMR-inova500**Study owner **vnmr2**  
Operator **vnmr2**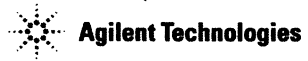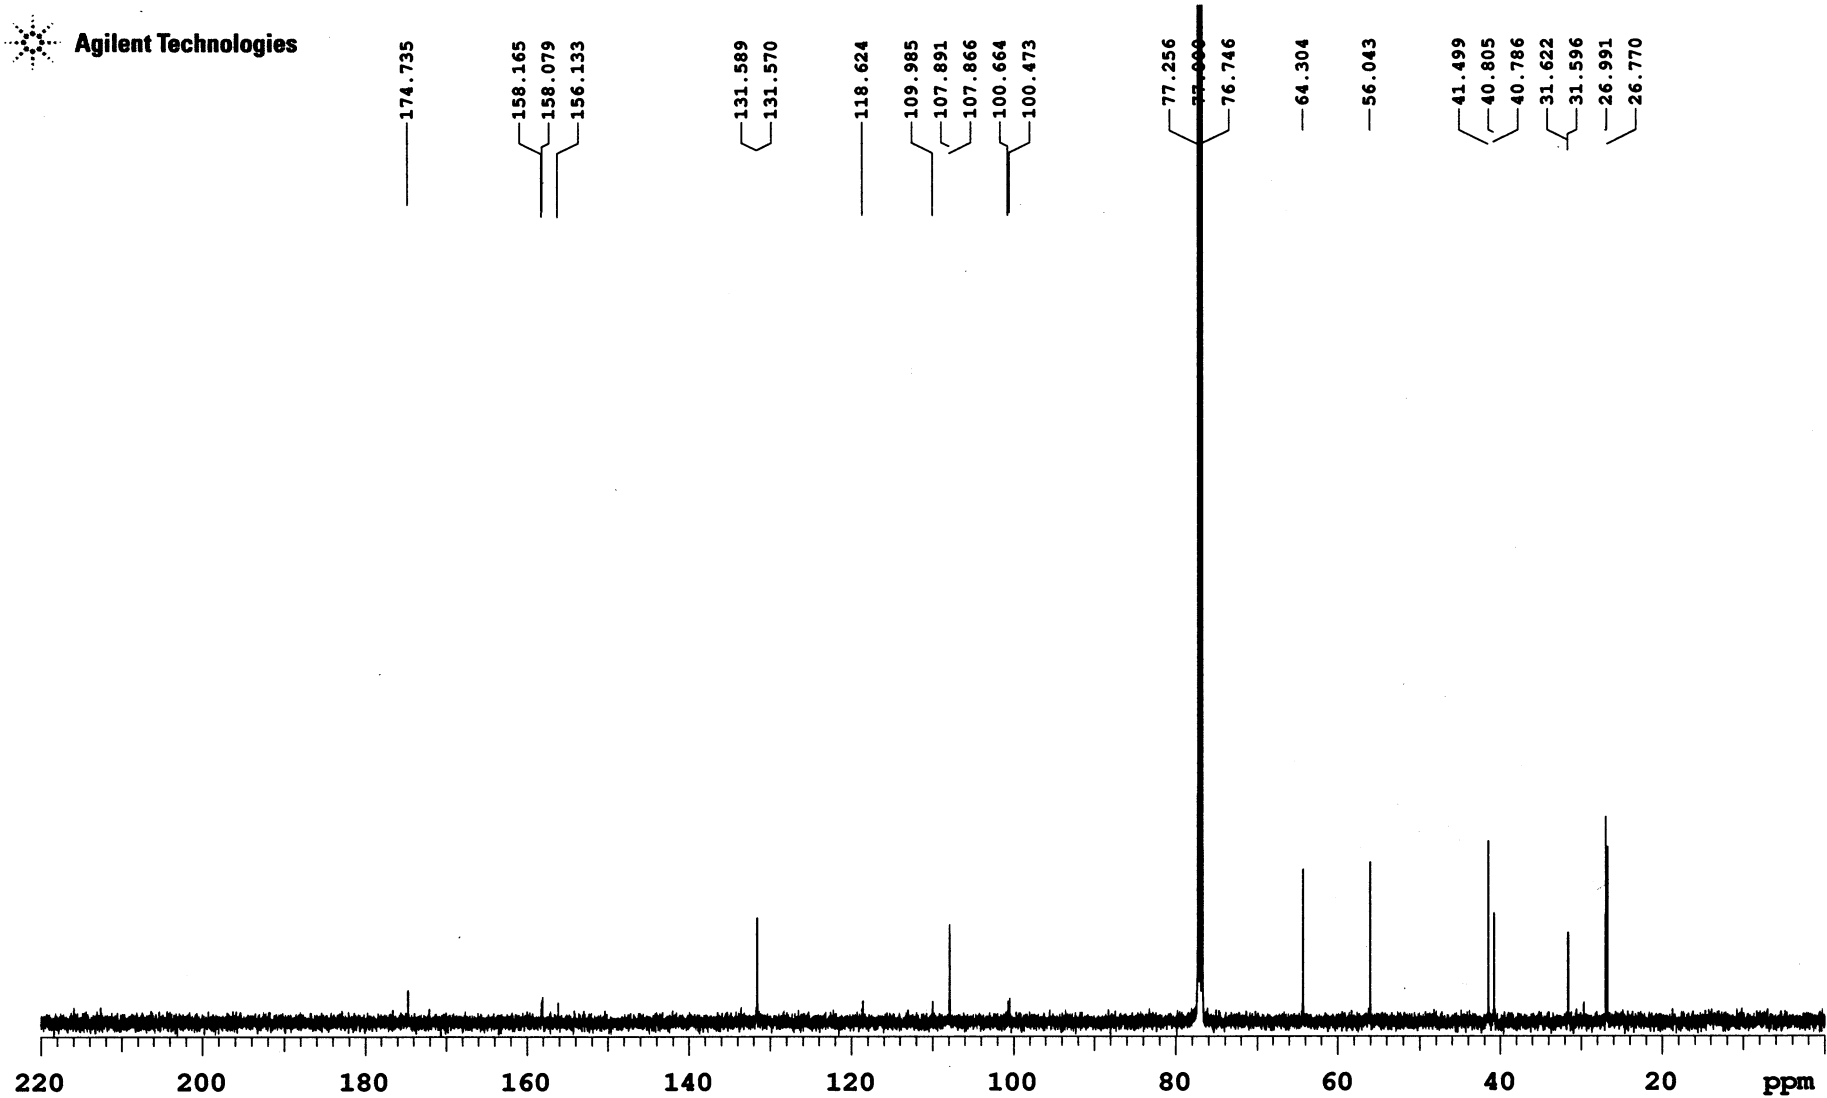Fig S228.  $^{13}\text{C}$  NMR ( $\text{CDCl}_3$ , 125 MHz) of compound anti-4i



Sample Name **LCH-02-407**  
Date collected **2015-05-07**Pulse sequence **DEPT**  
Solvent **cdcl3**Temperature **25**  
Spectrometer **Agilent-NMR-inova500**Study owner **vnmr2**  
Operator **vnmr2**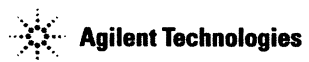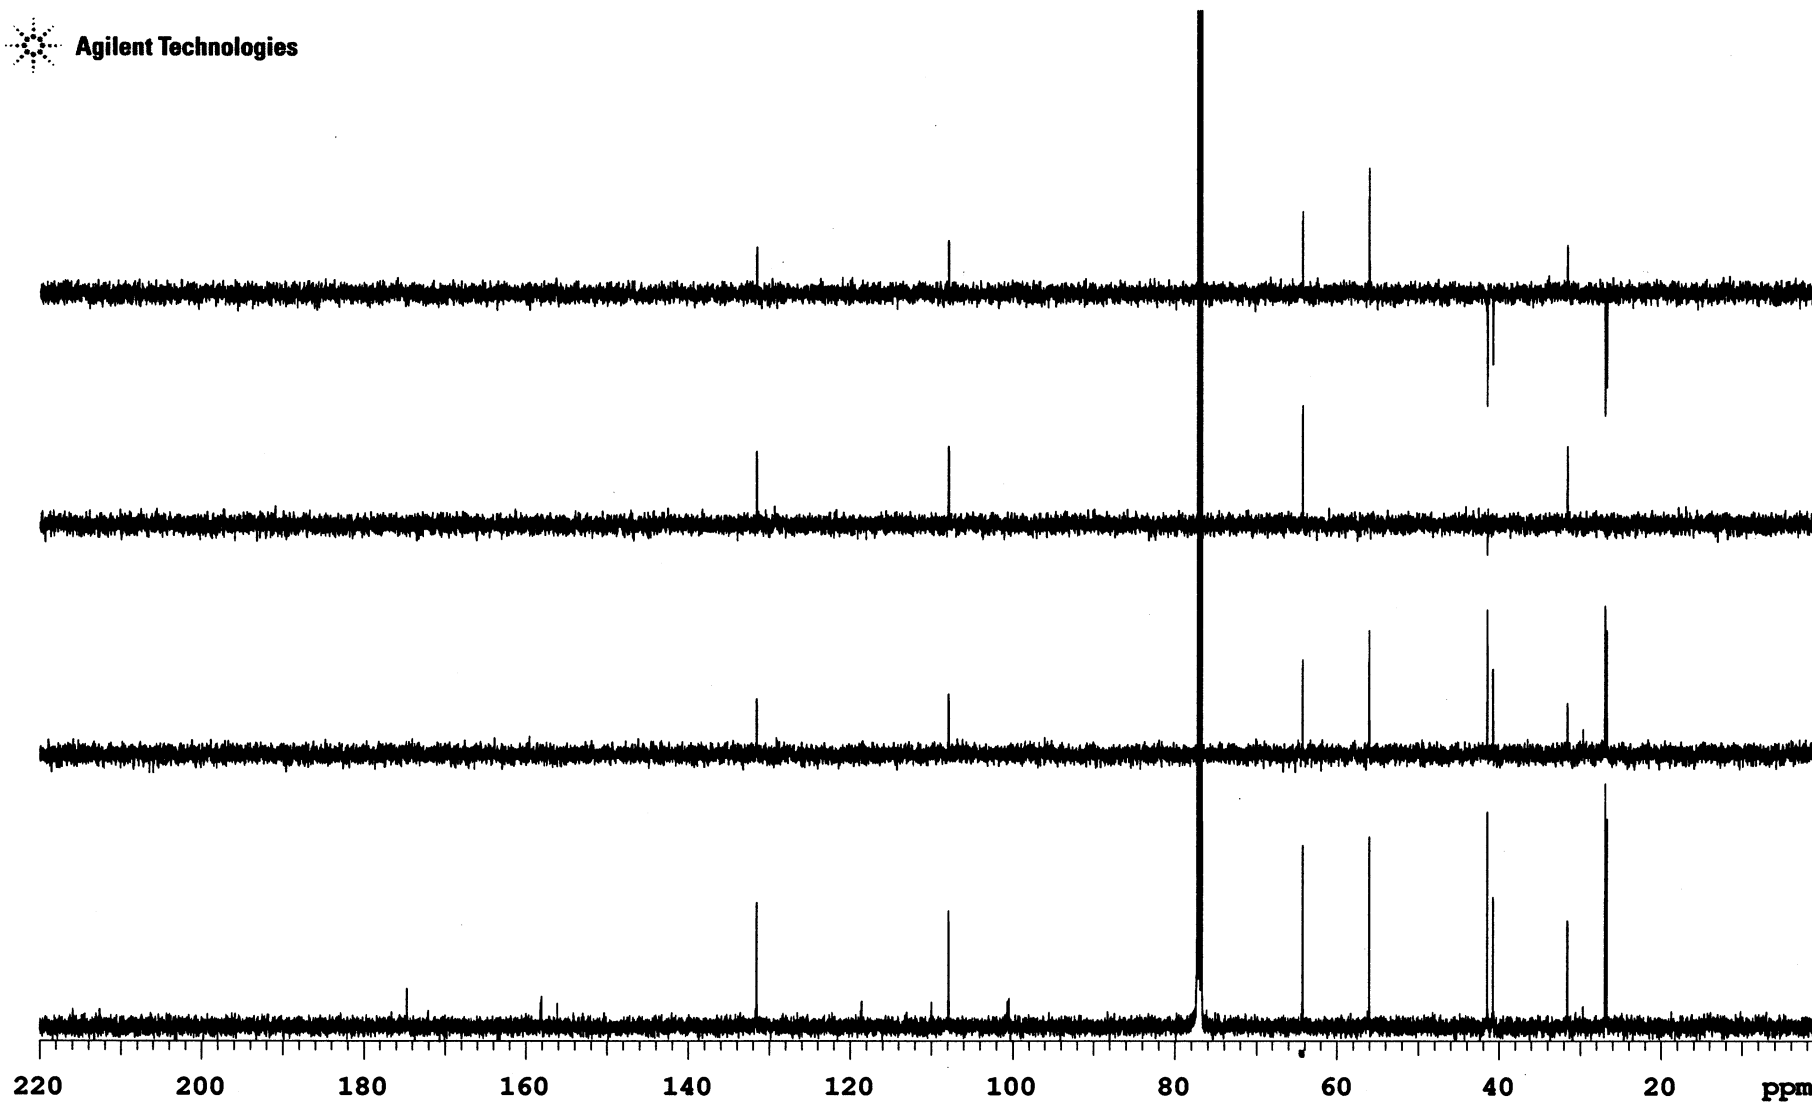

Fig S229. DEPT of compound anti-4i

LCH-02-407

Sample Name **LCH-02-407**  
Date collected **2015-05-07**Pulse sequence **gHSQC**  
Solvent **cdcl3**Temperature **25**  
Spectrometer **Agilent-NMR-inova500**Study owner **vnmr2**  
Operator **vnmr2**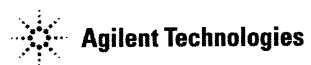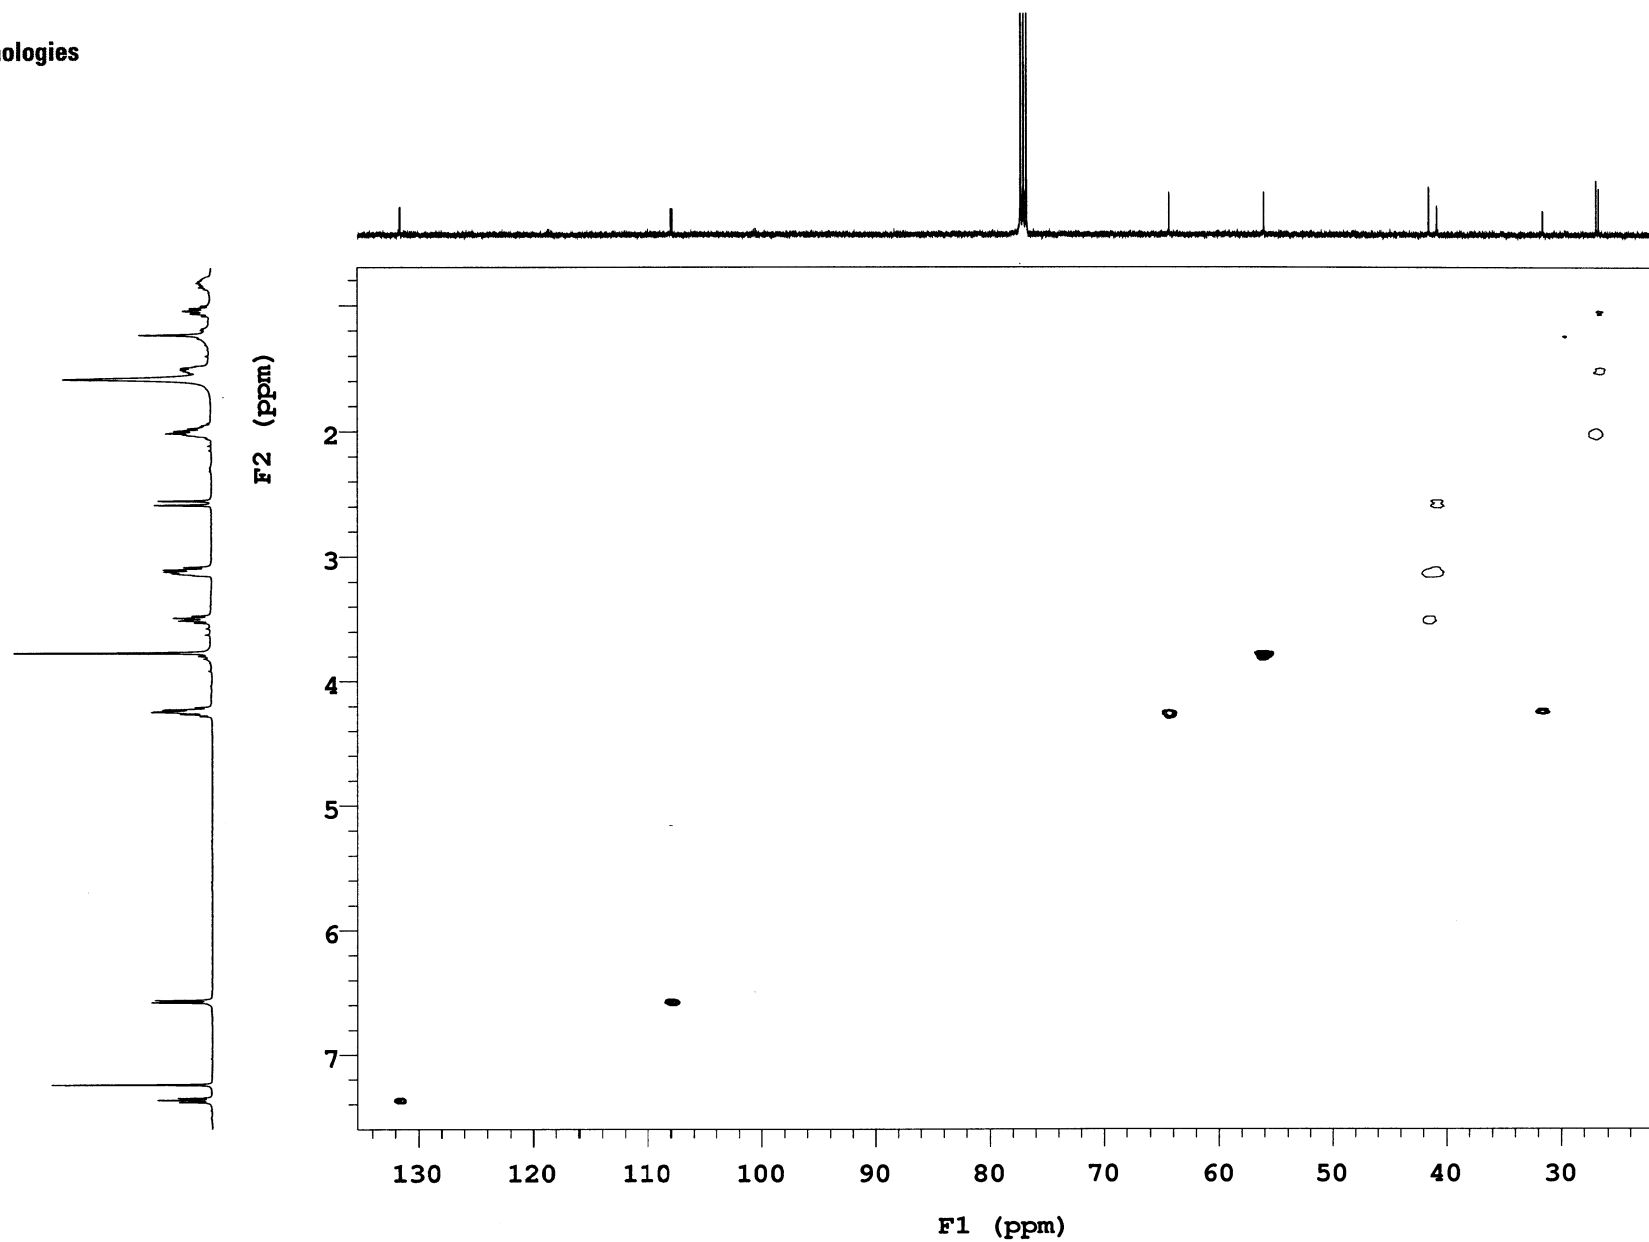

Fig S230. HSQC of compound anti-4i

LCH-02-407

Sample Name **LCH-02-407**  
Date collected **2015-05-07**Pulse sequence **gCOSY**  
Solvent **cdcl3**Temperature **25**  
Spectrometer **Agilent-NMR-inova500**Study owner **vnmr2**  
Operator **vnmr2**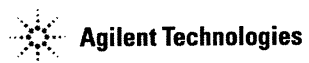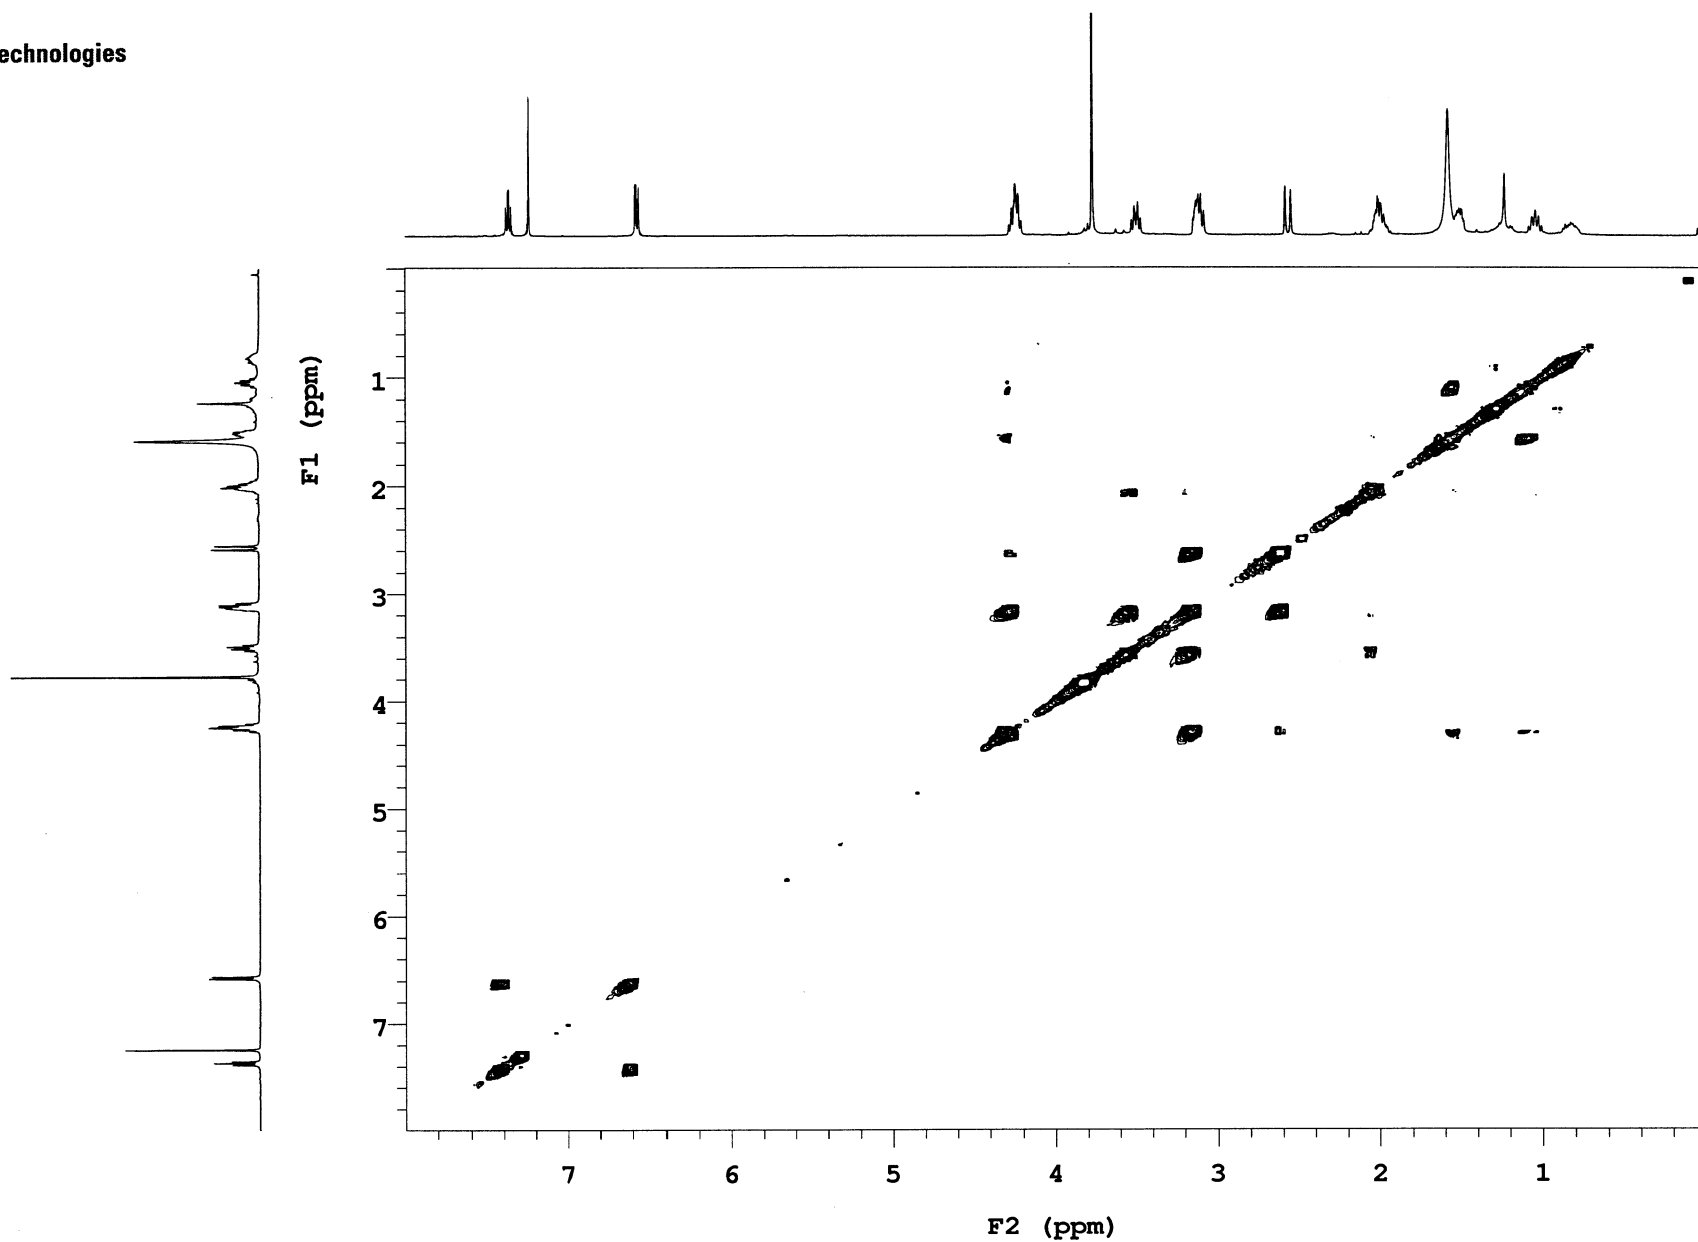

Fig S231. COSY of compound anti-4i

LCH-02-407

Sample Name **LCH-02-407**  
Date collected **2015-05-07**Pulse sequence **NOESY**  
Solvent **cdcl3**Temperature **25**  
Spectrometer **Agilent-NMR-inova500**Study owner **vnmr2**  
Operator **vnmr2**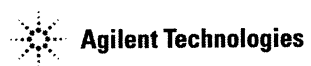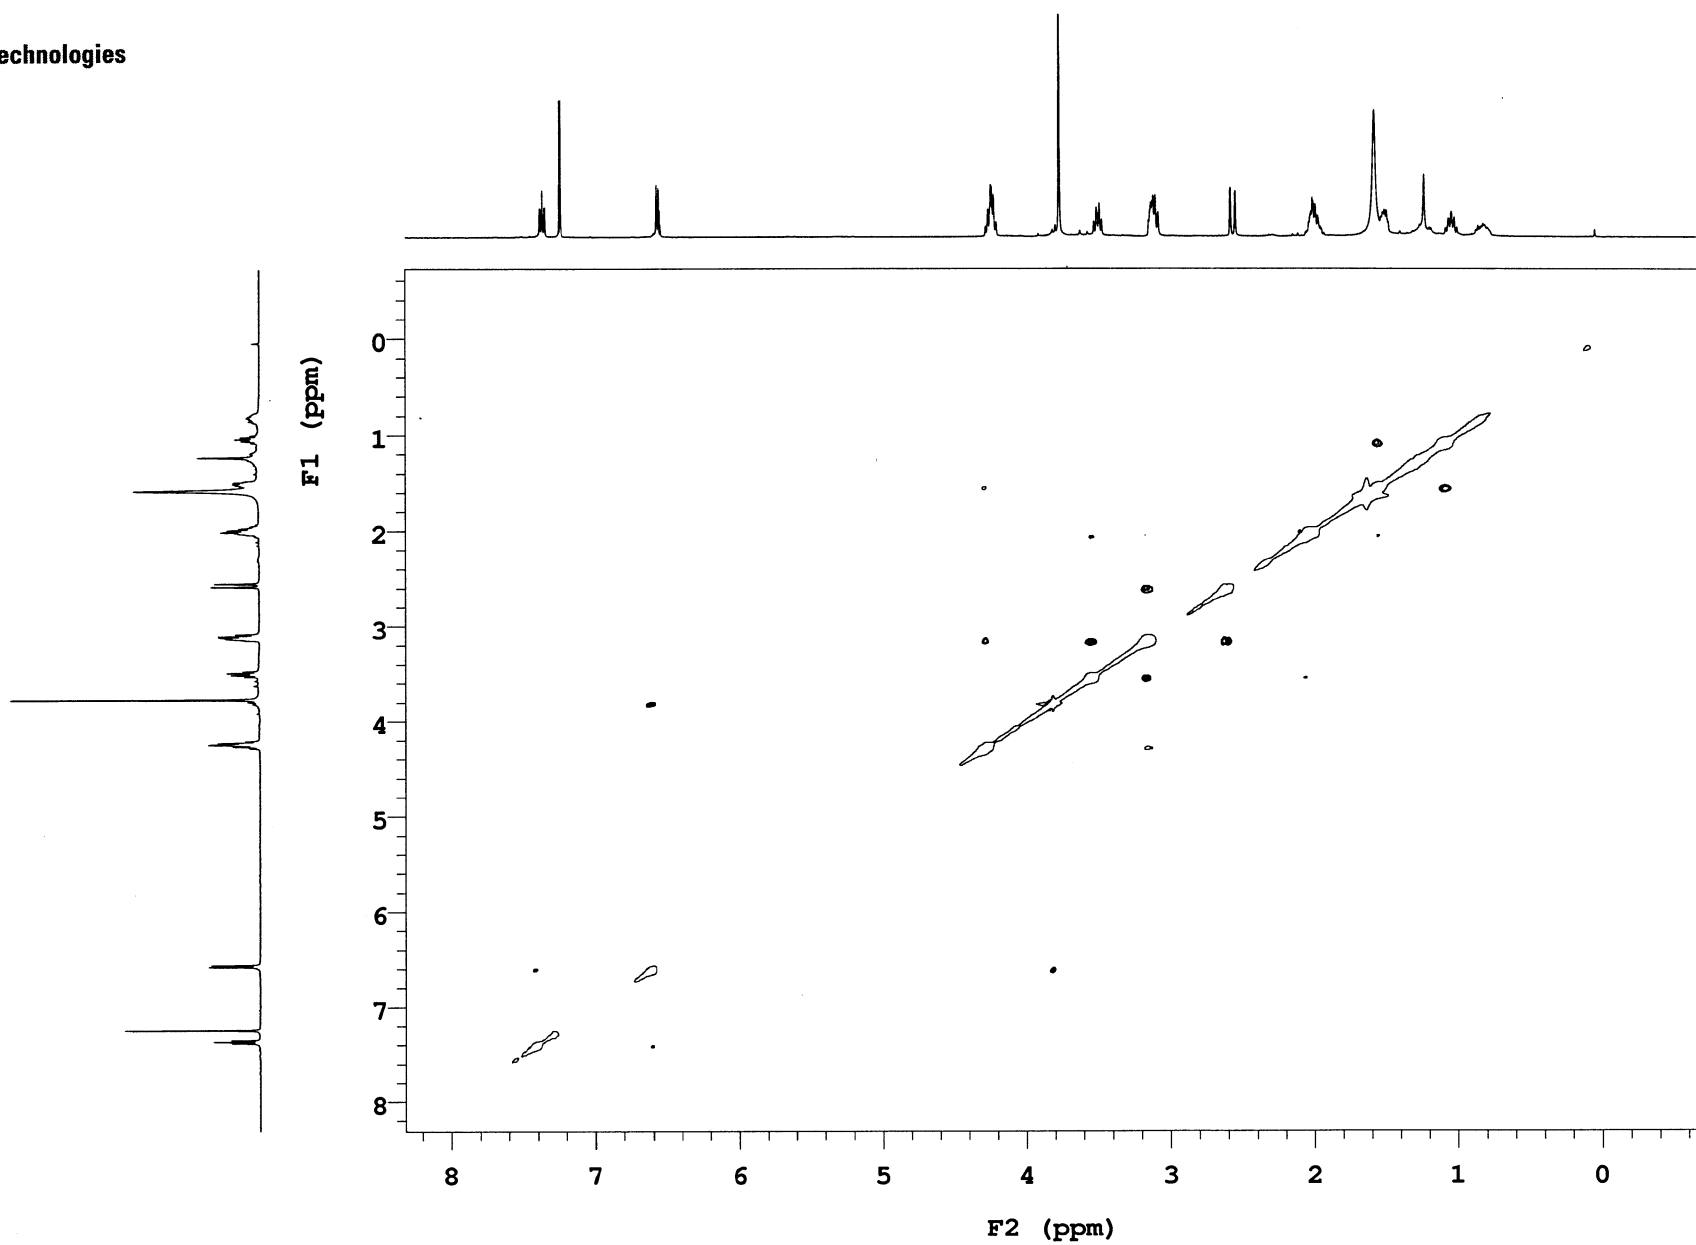

Fig S232. NOESY of compound anti-4i

**D-2000 Elite HPLC System Manager Report**Analyzed Date and Time: 2015/03/13  
02:50 下午Reported Date and Time: 2015/03/13  
03:36 下午Processed Date and Time: 2015/03/13  
03:35 下午

Data Path: D:\LCH\DATA\0036\

Processing Method: test-IPA/Hx

System (acquisition): Sys 1

Series: 0036

Application(data): LCH

Vial Number: 1

Sample Name: LCH-2-269-rac

Vial Type: UNK

Injection from this vial: 1 of 1

Volume: 20.0 ul

Sample Description: 10%IPA/Hx-1ml/min-col IB

Chrom Type: Fixed WL Chromatogram, 254 nm

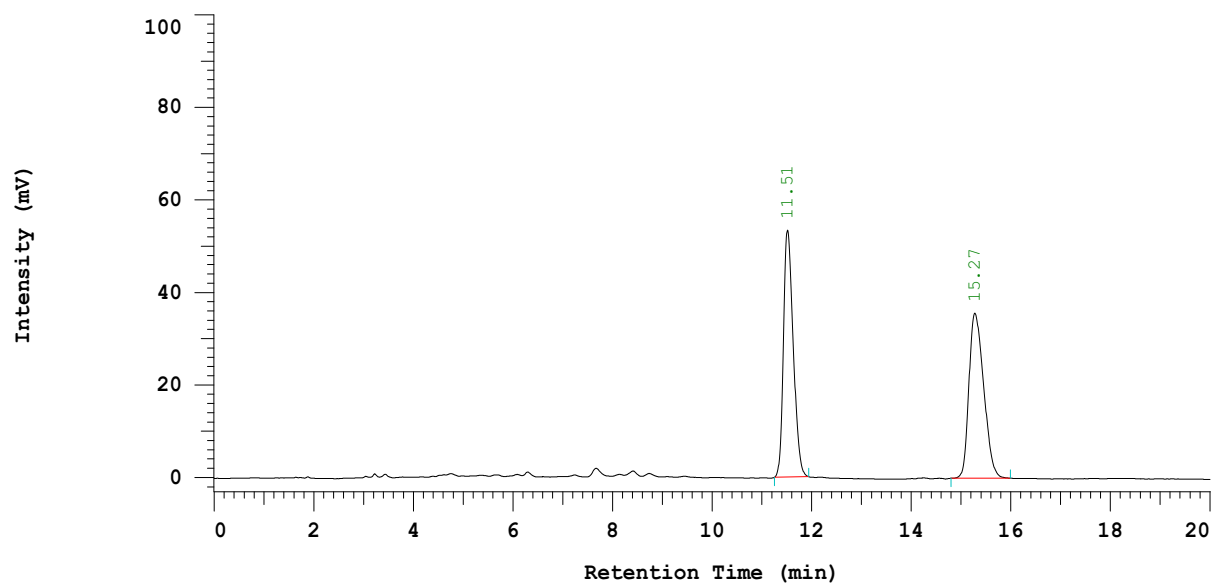

Processing Method: test-IPA/Hx

Column Type: IB

Method Developer: WL

Method Description:

Chrom Type: Fixed WL Chromatogram, 254 nm

Peak Quantitation: AREA

Calculation Method: EXT-STD

Scale Factor 1: 1.000

| No. | RT    | Area    | Height | Area %  |
|-----|-------|---------|--------|---------|
| 1   | 11.51 | 723788  | 53343  | 49.650  |
| 2   | 15.27 | 733995  | 35642  | 50.350  |
|     |       | 1457783 | 88985  | 100.000 |

Peak rejection level: 20000

**Fig S233. HPLC analysis of the racemic compound 2a,  
as a standard for comparison (Table 1, entry 1).**

**D-2000 Elite HPLC System Manager Report**Analyzed Date and Time: 2015/03/13  
03:11 下午Reported Date and Time: 2015/05/14  
09:22 下午Processed Date and Time: 2015/05/14  
09:22 下午

Data Path: D:\LCH\DATA\0037\

Processing Method: test-IPA/Hx

System (acquisition): Sys 1

Series: 0037

Application(data): LCH

Vial Number: 2

Sample Name: LCH-2-269-chiral

Vial Type: UNK

Injection from this vial: 1 of 1

Volume: 20.0 ul

Sample Description: 10%IPA/Hx-1ml/min-col IB

Chrom Type: Fixed WL Chromatogram, 254 nm

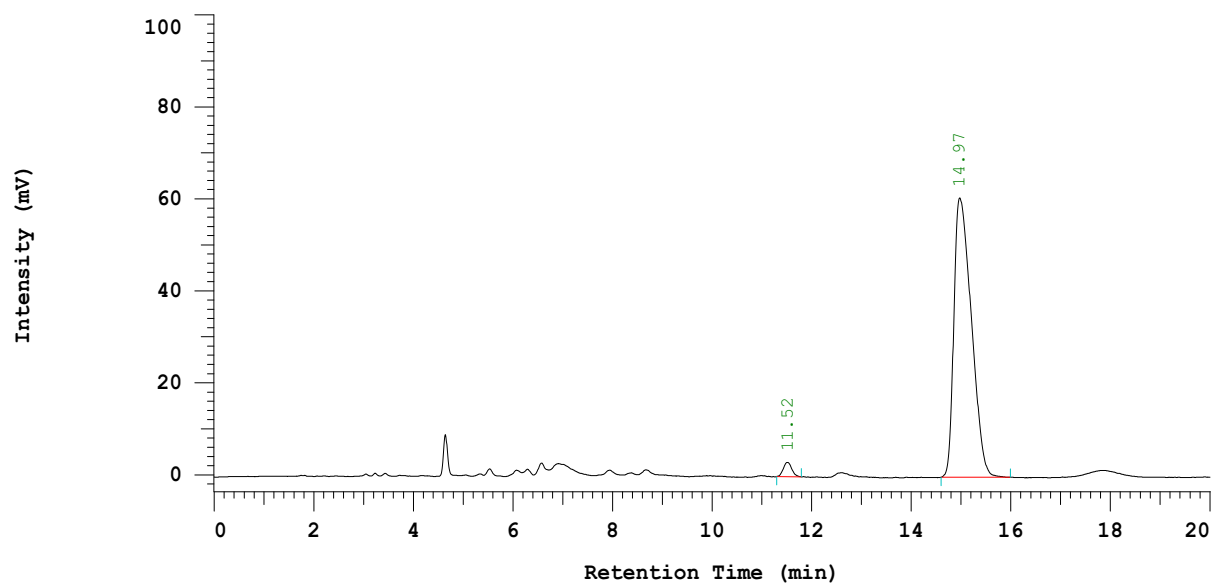

Processing Method: test-IPA/Hx

Column Type: IB

Method Developer: WL

Method Description:

Chrom Type: Fixed WL Chromatogram, 254 nm

Peak Quantitation: AREA

Calculation Method: EXT-STD

Scale Factor 1: 1.000

| No. | RT    | Area    | Height | Area %  |
|-----|-------|---------|--------|---------|
| 1   | 11.52 | 36342   | 3076   | 2.401   |
| 2   | 14.97 | 1477088 | 60717  | 97.599  |
|     |       | 1513430 | 63793  | 100.000 |

Peak rejection level: 20000

Fig S234. HPLC analysis of the chiral compound 2a obtained, (Table 1, entry 1).

**D-2000 Elite HPLC System Manager Report**

Analyzed Date and Time: 2015/03/13  
03:32 下午

Reported Date and Time: 2015/03/13  
04:36 下午

Processed Date and Time: 2015/03/13  
04:35 下午

Data Path: D:\LCH\DATA\0038\

Processing Method: test-IPA/Hx

System (acquisition): Sys 1

Series: 0038

Application(data): LCH

Vial Number: 3

Sample Name: LCH-2-269-co

Vial Type: UNK

Injection from this vial: 1 of 1

Volume: 20.0 ul

Sample Description: 10%IPA/Hx-1ml/min-col IB

Chrom Type: Fixed WL Chromatogram, 254 nm

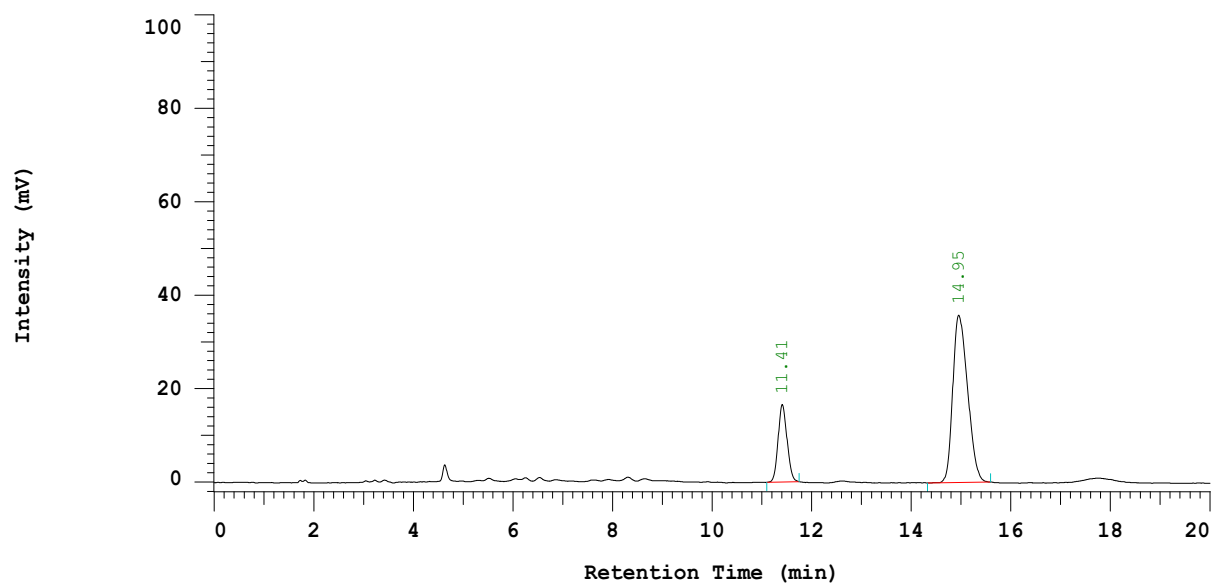

Processing Method: test-IPA/Hx

Column Type: IB

Method Developer: WL

Method Description:

Chrom Type: Fixed WL Chromatogram, 254 nm

Peak Quantitation: AREA

Calculation Method: EXT-STD

Scale Factor 1: 1.000

| No. | RT    | Area   | Height | Area %  |
|-----|-------|--------|--------|---------|
| 1   | 11.41 | 207472 | 16580  | 21.873  |
| 2   | 14.95 | 741073 | 35792  | 78.127  |
|     |       | 948545 | 52372  | 100.000 |

Peak rejection level: 20000

**Fig S235. HPLC analysis of the mixture of chiral compound 2a obtained and the racemic compound 2a, for comparison (Table 1, entry 1).**

**D-2000 Elite HPLC System Manager Report**Analyzed Date and Time: 2015/05/20  
07:30 下午Reported Date and Time: 2015/05/20  
08:18 下午Processed Date and Time: 2015/05/20  
08:18 下午

Data Path: D:\LCH\DATA\0217\

Processing Method: test-IPA/Hx

System (acquisition): Sys 1

Series: 0217

Application(data): LCH

Vial Number: 1

Sample Name: LCH-2-371-rac

Vial Type: UNK

Injection from this vial: 1 of 1

Volume: 20.0 ul

Sample Description: 5%IPA/Hx-1ml/min-col IC

Chrom Type: Fixed WL Chromatogram, 254 nm

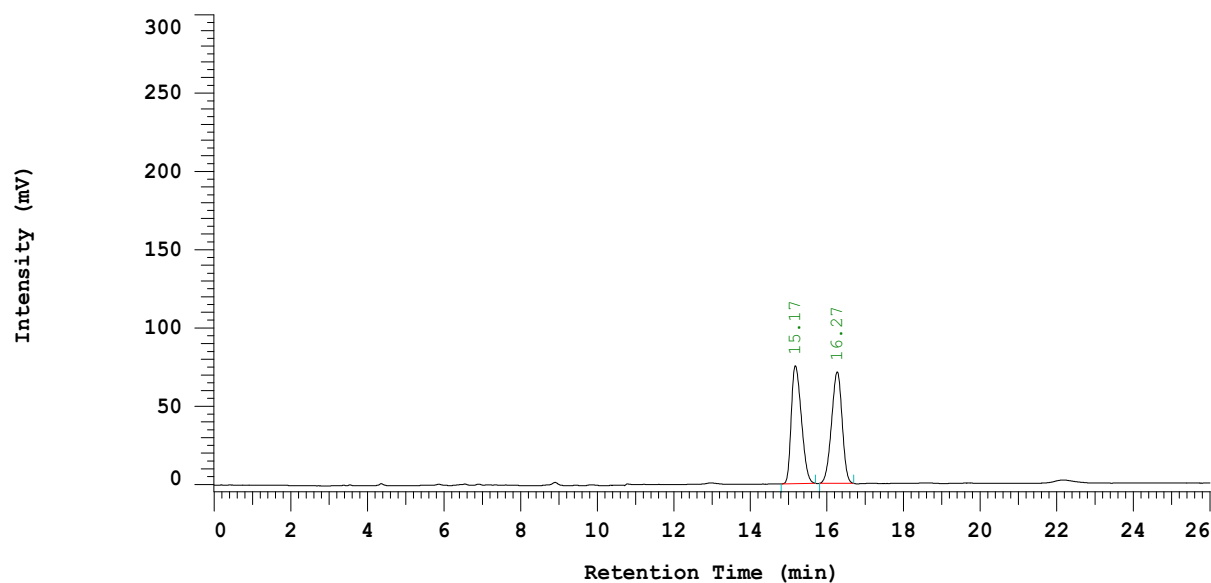

Processing Method: test-IPA/Hx

Column Type: IC

Method Developer: WL

Method Description:

Chrom Type: Fixed WL Chromatogram, 254 nm

Peak Quantitation: AREA

Calculation Method: EXT-STD

Scale Factor 1: 1.000

| No. | RT    | Area    | Height | Area %  |
|-----|-------|---------|--------|---------|
| 1   | 15.17 | 1369149 | 75358  | 50.167  |
| 2   | 16.27 | 1360038 | 71311  | 49.833  |
|     |       | 2729187 | 146669 | 100.000 |

Peak rejection level: 10000

Fig S236. HPLC analysis of the racemic compound 2b,  
as a standard for comparison (Table 1, entry 2).



**D-2000 Elite HPLC System Manager Report**Analyzed Date and Time: 2015/05/20  
09:09 下午Reported Date and Time: 2015/05/20  
09:38 下午Processed Date and Time: 2015/05/20  
09:38 下午

Data Path: D:\LCH\DATA\0220\

Processing Method: test-IPA/Hx

System (acquisition): Sys 1

Series: 0220

Application(data): LCH

Vial Number: 1

Sample Name: LCH-2-371-chiral

Vial Type: UNK

Injection from this vial: 1 of 1

Volume: 20.0 ul

Sample Description: 5%IPA/Hx-1ml/min-col IC

Chrom Type: Fixed WL Chromatogram, 254 nm

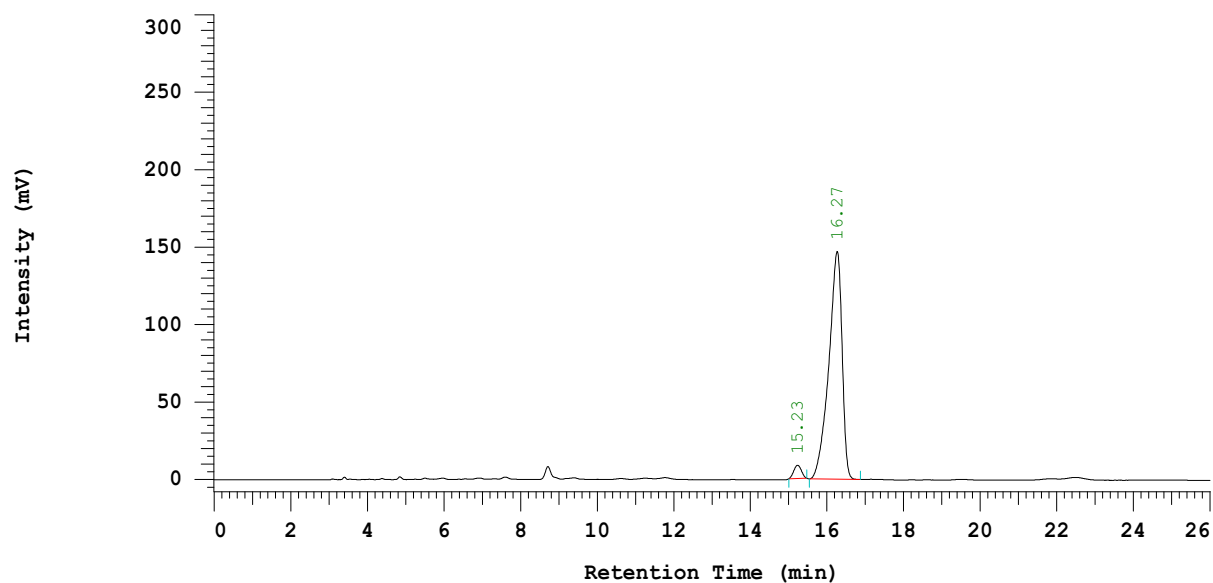

Processing Method: test-IPA/Hx

Column Type: IC

Method Developer: WL

Method Description:

Chrom Type: Fixed WL Chromatogram, 254 nm

Peak Quantitation: AREA

Calculation Method: EXT-STD

Scale Factor 1: 1.000

| No. | RT    | Area    | Height | Area %  |
|-----|-------|---------|--------|---------|
| 1   | 15.23 | 119698  | 8672   | 3.292   |
| 2   | 16.27 | 3515907 | 146995 | 96.708  |
|     |       | 3635605 | 155667 | 100.000 |

Peak rejection level: 10000

Fig S237. HPLC analysis of the chiral compound 2b obtained, (Table 1, entry 2).

**D-2000 Elite HPLC System Manager Report**Analyzed Date and Time: 2015/05/20  
08:38 下午Reported Date and Time: 2015/05/20  
09:07 下午Processed Date and Time: 2015/05/20  
09:07 下午

Data Path: D:\LCH\DATA\0219\

Processing Method: test-IPA/Hx

System (acquisition): Sys 1

Series: 0219

Application(data): LCH

Vial Number: 3

Sample Name: LCH-2-371-co

Vial Type: UNK

Injection from this vial: 1 of 1

Volume: 20.0 ul

Sample Description: 5%IPA/Hx-1ml/min-col IC

Chrom Type: Fixed WL Chromatogram, 254 nm

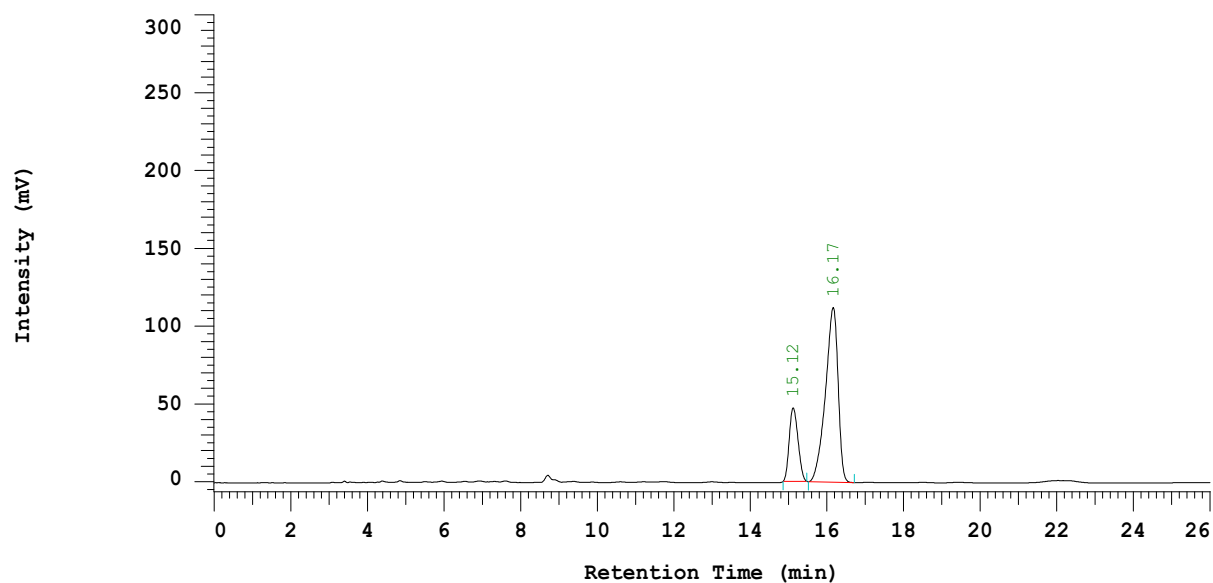

Processing Method: test-IPA/Hx

Column Type: IC

Method Developer: WL

Method Description:

Chrom Type: Fixed WL Chromatogram, 254 nm

Peak Quantitation: AREA

Calculation Method: EXT-STD

Scale Factor 1: 1.000

| No. | RT    | Area    | Height | Area %  |
|-----|-------|---------|--------|---------|
| 1   | 15.12 | 746147  | 47242  | 22.567  |
| 2   | 16.17 | 2560145 | 112207 | 77.433  |
|     |       | 3306292 | 159449 | 100.000 |

Peak rejection level: 10000

**Fig S238. HPLC analysis of the mixture of chiral compound 2b obtained and the racemic compound 2b, for comparison (Table 1, entry 2).**

**D-2000 Elite HPLC System Manager Report**Analyzed Date and Time: 2015/03/08  
07:28 下午Reported Date and Time: 2015/03/08  
07:59 下午Processed Date and Time: 2015/03/08  
07:58 下午

Data Path: D:\LCH\DATA\0033\

Processing Method: test-IPA/Hx

System (acquisition): Sys 1

Series: 0033

Application(data): LCH

Vial Number: 1

Sample Name: LCH-2-288-rac

Vial Type: UNK

Injection from this vial: 1 of 1

Volume: 20.0 ul

Sample Description: 10%IPA/Hx-1ml/min-col IB

Chrom Type: Fixed WL Chromatogram, 254 nm

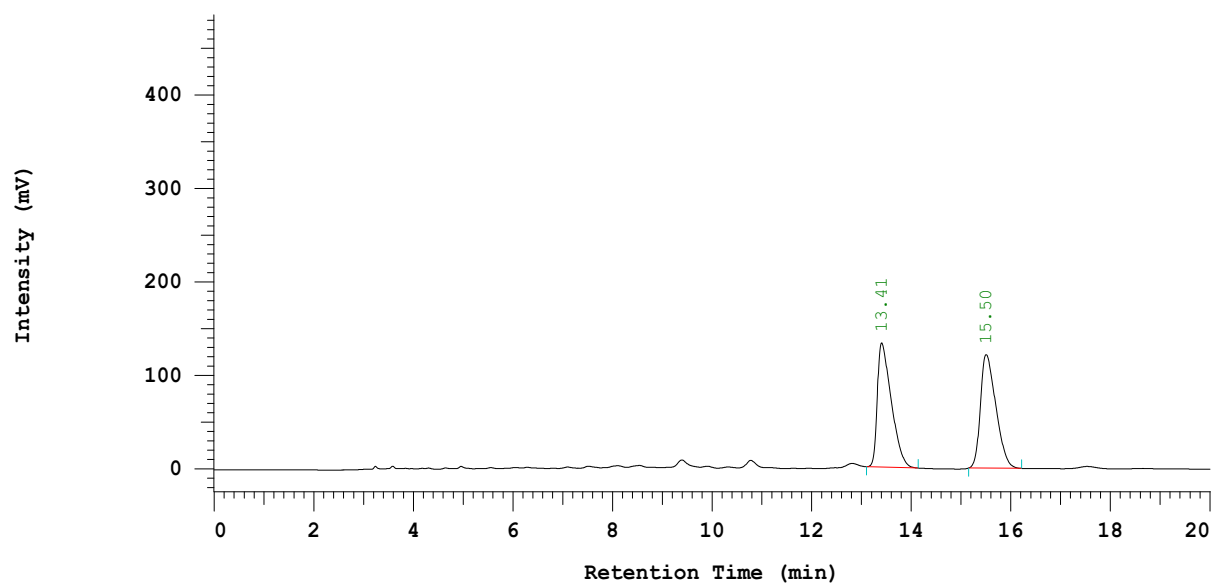

Processing Method: test-IPA/Hx

Column Type: IB

Method Developer: WL

Method Description:

Chrom Type: Fixed WL Chromatogram, 254 nm

Peak Quantitation: AREA

Calculation Method: EXT-STD

Scale Factor 1: 1.000

| No. | RT    | Area    | Height | Area %  |
|-----|-------|---------|--------|---------|
| 1   | 13.41 | 2594974 | 132986 | 49.657  |
| 2   | 15.50 | 2630874 | 121354 | 50.343  |
|     |       | 5225848 | 254340 | 100.000 |

Peak rejection level: 20000

Fig S239. HPLC analysis of the racemic compound 2c,  
as a standard for comparison (Table 1, entry 3).

**D-2000 Elite HPLC System Manager Report**

Analyzed Date and Time: 2015/03/08  
07:49 下午

Reported Date and Time: 2015/03/13  
03:30 下午

Processed Date and Time: 2015/03/13  
03:29 下午

Data Path: D:\LCH\DATA\0034\

Processing Method: test-IPA/Hx

System (acquisition): Sys 1

Series: 0034

Application(data): LCH

Vial Number: 2

Sample Name: LCH-2-288-chiral

Vial Type: UNK

Injection from this vial: 1 of 1

Volume: 20.0 ul

Sample Description: 10%IPA/Hx-1ml/min-col IB

Chrom Type: Fixed WL Chromatogram, 254 nm

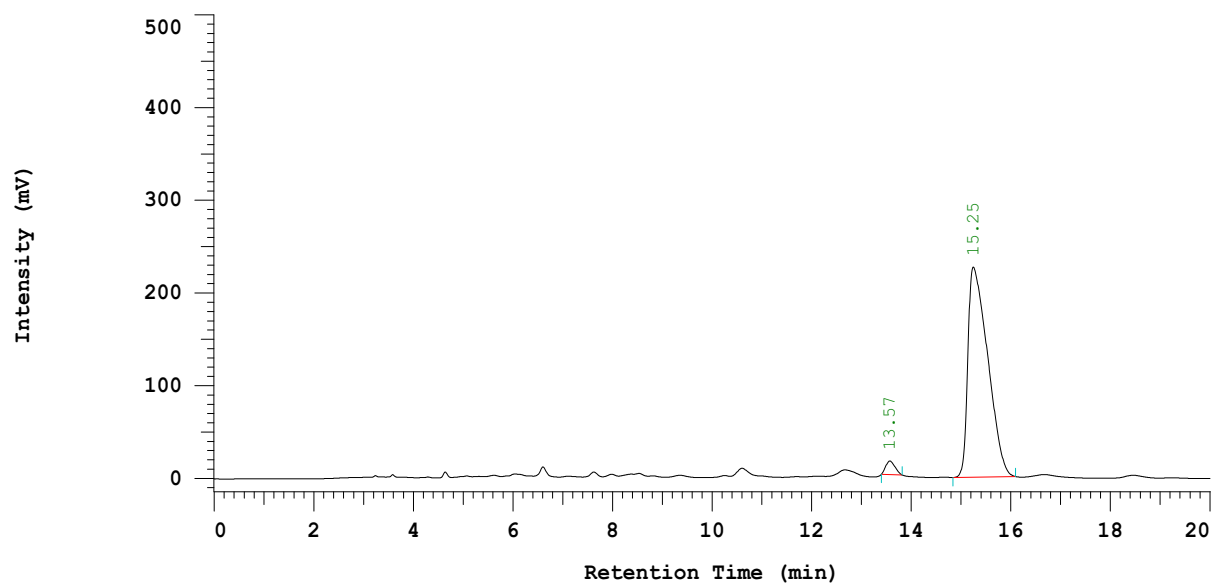

Processing Method: test-IPA/Hx

Column Type: IB

Method Developer: WL

Method Description:

Chrom Type: Fixed WL Chromatogram, 254 nm

Peak Quantitation: AREA

Calculation Method: EXT-STD

Scale Factor 1: 1.000

| No. | RT    | Area    | Height | Area %  |
|-----|-------|---------|--------|---------|
| 1   | 13.57 | 189705  | 14656  | 2.940   |
| 2   | 15.25 | 6261858 | 226509 | 97.060  |
|     |       | 6451563 | 241165 | 100.000 |

Peak rejection level: 20000

Fig S240. HPLC analysis of the chiral compound 2c obtained, (Table 1, entry 3).

**D-2000 Elite HPLC System Manager Report**

Analyzed Date and Time: 2015/03/08  
08:11 下午

Reported Date and Time: 2015/03/08  
08:36 下午

Processed Date and Time: 2015/03/08  
08:36 下午

Data Path: D:\LCH\DATA\0035\

Processing Method: test-IPA/Hx

System (acquisition): Sys 1

Series: 0035

Application(data): LCH

Vial Number: 3

Sample Name: LCH-2-288-co

Vial Type: UNK

Injection from this vial: 1 of 1

Volume: 20.0 ul

Sample Description: 10%IPA/Hx-1ml/min-col IB

Chrom Type: Fixed WL Chromatogram, 254 nm

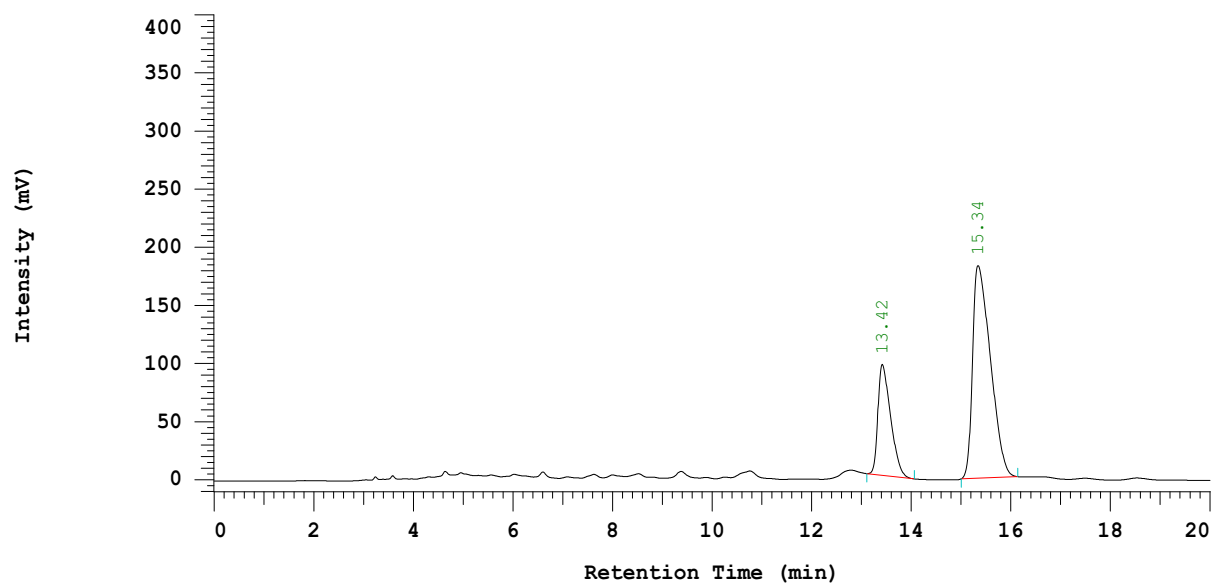

Processing Method: test-IPA/Hx

Column Type: IB

Method Developer: WL

Method Description:

Chrom Type: Fixed WL Chromatogram, 254 nm

Peak Quantitation: AREA

Calculation Method: EXT-STD

Scale Factor 1: 1.000

| No. | RT    | Area    | Height | Area %  |
|-----|-------|---------|--------|---------|
| 1   | 13.42 | 1698138 | 95452  | 27.129  |
| 2   | 15.34 | 4561361 | 182701 | 72.871  |
|     |       | 6259499 | 278153 | 100.000 |

Peak rejection level: 20000

**Fig S241. HPLC analysis of the mixture of chiral compound 2c obtained and the racemic compound 2c, for comparison (Table 1, entry 3).**

**D-2000 Elite HPLC System Manager Report**Analyzed Date and Time: 2015/01/18  
06:13 下午Reported Date and Time: 2015/10/29  
01:26 下午Processed Date and Time: 2015/10/29  
01:26 下午

Data Path: D:\LCH\DATA\0008\

Processing Method: test-IPA/Hx

System (acquisition): Sys 1

Series: 0008

Application(data): LCH

Vial Number: 1

Sample Name: LCH-2-342-rac

Vial Type: UNK

Injection from this vial: 1 of 1

Volume: 20.0 ul

Sample Description: 10%IPA/Hx-1ml/min-col IB

Chrom Type: Fixed WL Chromatogram, 238 nm

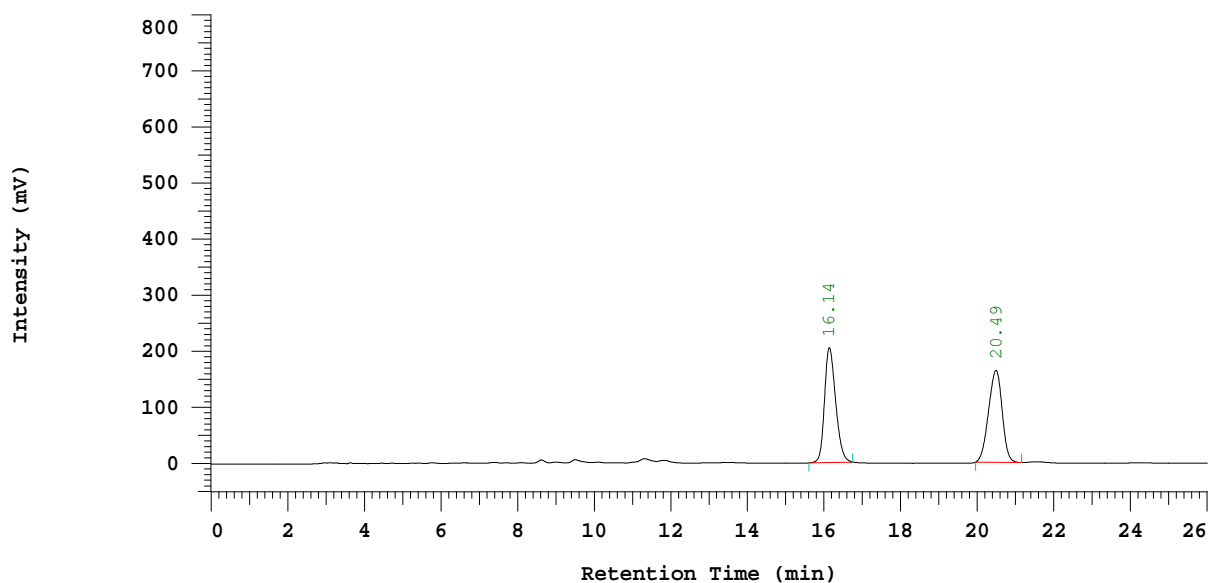

Processing Method: test-IPA/Hx

Column Type: IB

Method Developer: WL

Method Description:

Chrom Type: Fixed WL Chromatogram, 238 nm

Peak Quantitation: AREA

Calculation Method: EXT-STD

Scale Factor 1: 1.000

| No. | RT    | Area    | Height | Area %  |
|-----|-------|---------|--------|---------|
| 1   | 16.14 | 4095295 | 204628 | 50.415  |
| 2   | 20.49 | 4027838 | 163845 | 49.585  |
|     |       | 8123133 | 368473 | 100.000 |

Peak rejection level: 10000

Fig S242. HPLC analysis of the racemic compound 2d,  
as a standard for comparison (Table 1, entry 4).

**D-2000 Elite HPLC System Manager Report**

Analyzed Date and Time: 2015/01/18  
06:45 下午

Reported Date and Time: 2015/10/29  
01:36 下午

Processed Date and Time: 2015/10/29  
01:35 下午

Data Path: D:\LCH\DATA\0009\

Processing Method: test-IPA/Hx

System (acquisition): Sys 1

Series: 0009

Application(data): LCH

Vial Number: 2

Sample Name: LCH-2-342-chiral

Vial Type: UNK

Injection from this vial: 1 of 1

Volume: 20.0 ul

Sample Description: 10%IPA/Hx-1ml/min-col IB

Chrom Type: Fixed WL Chromatogram, 238 nm

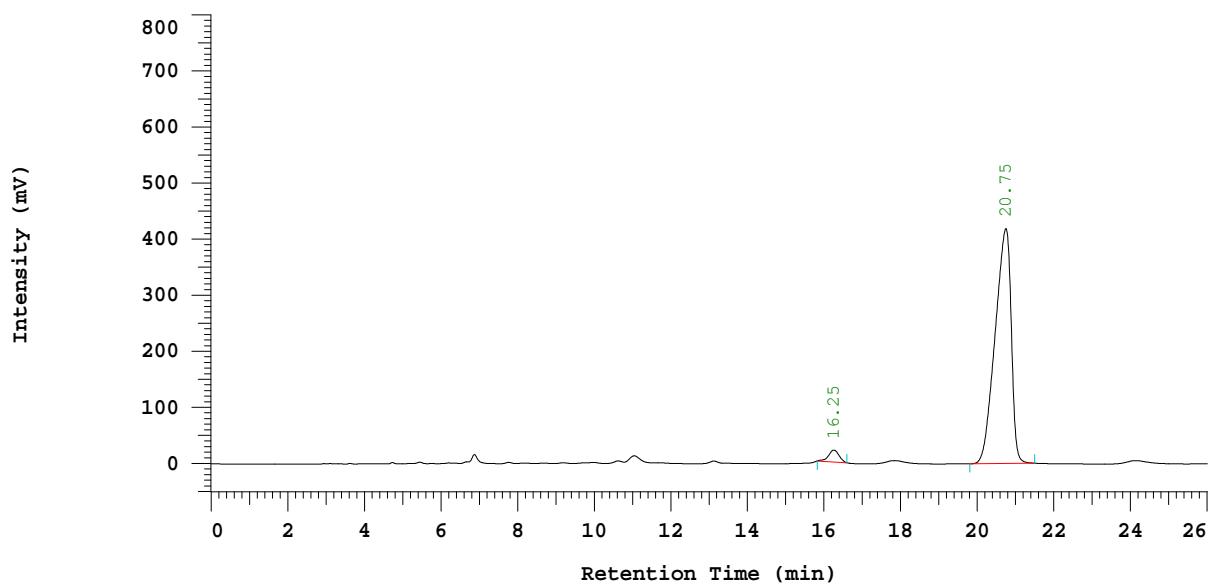

Processing Method: test-IPA/Hx

Column Type: IB

Method Developer: WL

Method Description:

Chrom Type: Fixed WL Chromatogram, 238 nm

Peak Quantitation: AREA

Calculation Method: EXT-STD

Scale Factor 1: 1.000

| No. | RT    | Area     | Height | Area %  |
|-----|-------|----------|--------|---------|
| 1   | 16.25 | 397741   | 21125  | 3.170   |
| 2   | 20.75 | 12147809 | 418596 | 96.830  |
|     |       | 12545550 | 439721 | 100.000 |

Peak rejection level: 10000

Fig S243. HPLC analysis of the chiral compound 2d obtained, (Table 1, entry 4).

**D-2000 Elite HPLC System Manager Report**Analyzed Date and Time: 2015/01/18  
07:16 下午Reported Date and Time: 2015/10/29  
01:39 下午Processed Date and Time: 2015/10/29  
01:39 下午

Data Path: D:\LCH\DATA\0010\

Processing Method: test-IPA/Hx

System (acquisition): Sys 1

Series: 0010

Application(data): LCH

Vial Number: 3

Sample Name: LCH-2-342-co

Vial Type: UNK

Injection from this vial: 1 of 1

Volume: 20.0 ul

Sample Description: 10%IPA/Hx-1ml/min-col IB

Chrom Type: Fixed WL Chromatogram, 238 nm

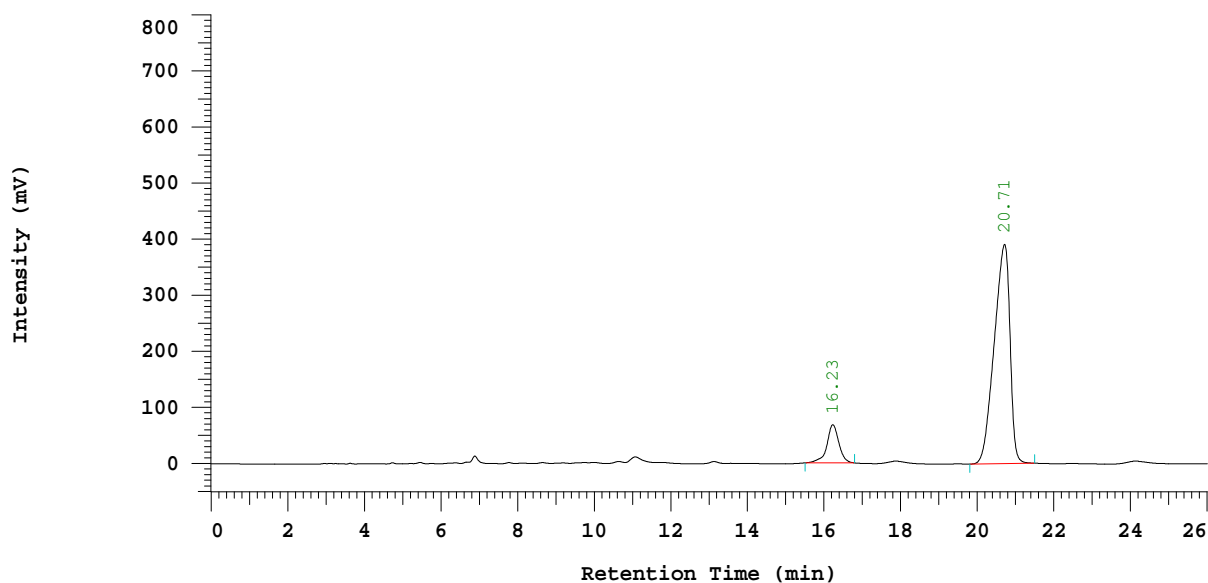

Processing Method: test-IPA/Hx

Column Type: IB

Method Developer: WL

Method Description:

Chrom Type: Fixed WL Chromatogram, 238 nm

Peak Quantitation: AREA

Calculation Method: EXT-STD

Scale Factor 1: 1.000

| No. | RT    | Area     | Height | Area %  |
|-----|-------|----------|--------|---------|
| 1   | 16.23 | 1464419  | 67944  | 11.661  |
| 2   | 20.71 | 11093313 | 390807 | 88.339  |
|     |       | 12557732 | 458751 | 100.000 |

Peak rejection level: 10000

Fig S244. HPLC analysis of the mixture of chiral compound 2d obtained and the racemic compound 2d, for comparison (Table 1, entry 4)



**D-2000 Elite HPLC System Manager Report**Analyzed Date and Time: 2015/02/12  
01:56 下午Reported Date and Time: 2015/10/29  
01:45 下午Processed Date and Time: 2015/10/29  
01:45 下午

Data Path: D:\LCH\DATA\0021\

Processing Method: test-IPA/Hx

System (acquisition): Sys 1

Series: 0021

Application(data): LCH

Vial Number: 1

Sample Name: LCH-2-350-rac

Vial Type: UNK

Injection from this vial: 1 of 1

Volume: 20.0 ul

Sample Description: 10%IPA/Hx-1ml/min-col IB

Chrom Type: Fixed WL Chromatogram, 254 nm

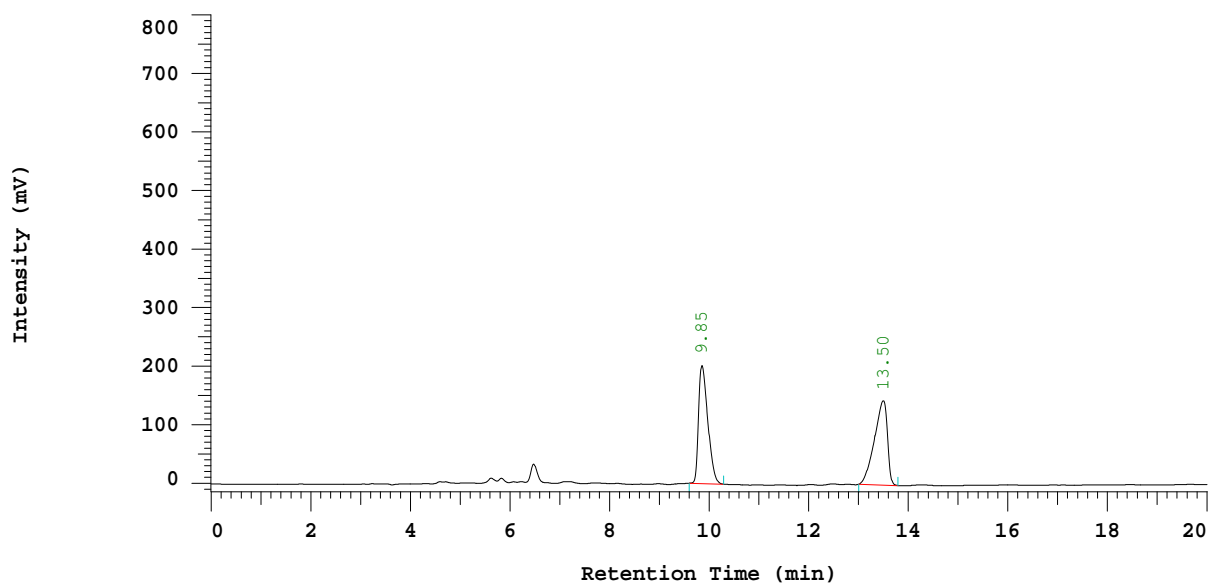

Processing Method: test-IPA/Hx

Column Type: IB

Method Developer: WL

Method Description:

Chrom Type: Fixed WL Chromatogram, 254 nm

Peak Quantitation: AREA

Calculation Method: EXT-STD

Scale Factor 1: 1.000

| No. | RT    | Area    | Height | Area %  |
|-----|-------|---------|--------|---------|
| 1   | 9.85  | 2622204 | 201404 | 50.085  |
| 2   | 13.50 | 2613273 | 143943 | 49.915  |
|     |       | 5235477 | 345347 | 100.000 |

Peak rejection level: 10000

Fig S245. HPLC analysis of the racemic compound 2e,  
as a standard for comparison (Table 1, entry 5).

**D-2000 Elite HPLC System Manager Report**Analyzed Date and Time: 2015/02/12  
02:17 下午Reported Date and Time: 2015/10/29  
01:48 下午Processed Date and Time: 2015/10/29  
01:47 下午

Data Path: D:\LCH\DATA\0022\

Processing Method: test-IPA/Hx

System (acquisition): Sys 1

Series: 0022

Application(data): LCH

Vial Number: 2

Sample Name: LCH-2-350-chiral

Vial Type: UNK

Injection from this vial: 1 of 1

Volume: 20.0 ul

Sample Description: 10%IPA/Hx-1ml/min-col IB

Chrom Type: Fixed WL Chromatogram, 254 nm

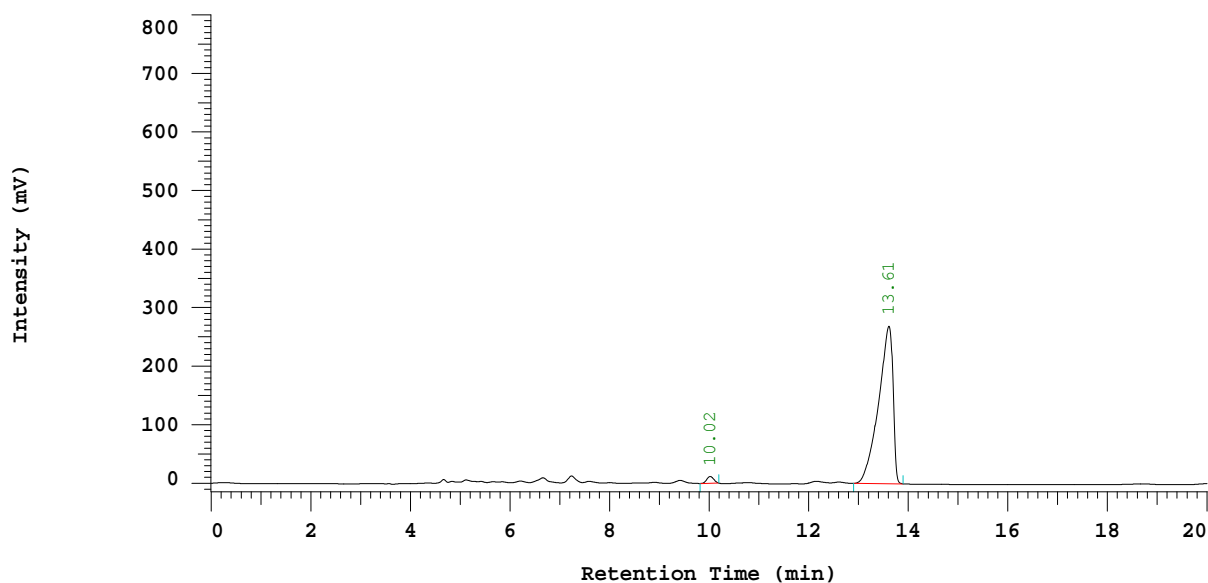

Processing Method: test-IPA/Hx

Column Type: IB

Method Developer: WL

Method Description:

Chrom Type: Fixed WL Chromatogram, 254 nm

Peak Quantitation: AREA

Calculation Method: EXT-STD

Scale Factor 1: 1.000

| No. | RT    | Area    | Height | Area %  |
|-----|-------|---------|--------|---------|
| 1   | 10.02 | 114431  | 11553  | 2.062   |
| 2   | 13.61 | 5435543 | 269019 | 97.938  |
|     |       | 5549974 | 280572 | 100.000 |

Peak rejection level: 10000

Fig S246. HPLC analysis of the chiral compound 2e obtained, (Table 1, entry 5).

**D-2000 Elite HPLC System Manager Report**Analyzed Date and Time: 2015/02/12  
03:02 下午Reported Date and Time: 2015/10/29  
01:54 下午Processed Date and Time: 2015/10/29  
01:53 下午

Data Path: D:\LCH\DATA\0024\

Processing Method: test-IPA/Hx

System (acquisition): Sys 1

Series: 0024

Application(data): LCH

Vial Number: 1

Sample Name: LCH-2-350-co

Vial Type: UNK

Injection from this vial: 1 of 1

Volume: 20.0 ul

Sample Description: 10%IPA/Hx-1ml/min-col IB

Chrom Type: Fixed WL Chromatogram, 254 nm

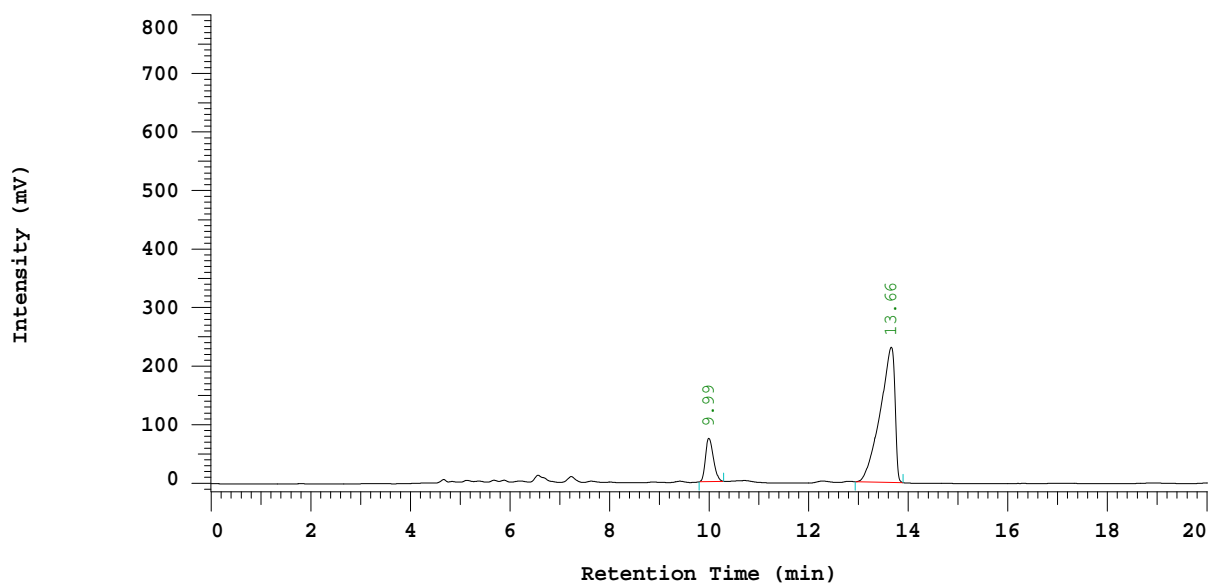

Processing Method: test-IPA/Hx

Column Type: IB

Method Developer: WL

Method Description:

Chrom Type: Fixed WL Chromatogram, 254 nm

Peak Quantitation: AREA

Calculation Method: EXT-STD

Scale Factor 1: 1.000

| No. | RT    | Area    | Height | Area %  |
|-----|-------|---------|--------|---------|
| 1   | 9.99  | 828335  | 74045  | 14.778  |
| 2   | 13.66 | 4776816 | 230969 | 85.222  |
|     |       | 5605151 | 305014 | 100.000 |

Peak rejection level: 10000

Fig S247. HPLC analysis of the mixture of chiral compound 2e obtained and the racemic compound 2e, for comparison (Table 1, entry 5)

**D-2000 Elite HPLC System Manager Report**Analyzed Date and Time: 2015/03/13  
03:59 下午Reported Date and Time: 2015/03/13  
04:32 下午Processed Date and Time: 2015/03/13  
04:31 下午

Data Path: D:\LCH\DATA\0039\

Processing Method: test-IPA/Hx

System (acquisition): Sys 1

Series: 0039

Application(data): LCH

Vial Number: 1

Sample Name: LCH-2-386-rac

Vial Type: UNK

Injection from this vial: 1 of 1

Volume: 20.0 ul

Sample Description: 10%IPA/Hx-1ml/min-col IB

Chrom Type: Fixed WL Chromatogram, 254 nm

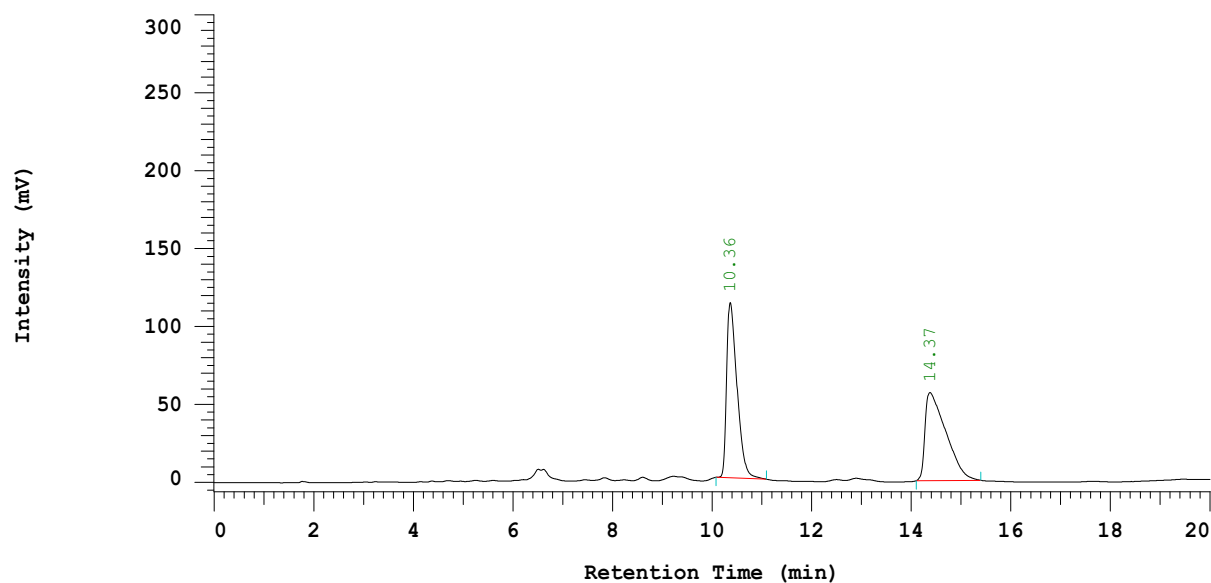

Processing Method: test-IPA/Hx

Column Type: IB

Method Developer: WL

Method Description:

Chrom Type: Fixed WL Chromatogram, 254 nm

Peak Quantitation: AREA

Calculation Method: EXT-STD

Scale Factor 1: 1.000

| No. | RT    | Area    | Height | Area %  |
|-----|-------|---------|--------|---------|
| 1   | 10.36 | 1634777 | 112482 | 49.731  |
| 2   | 14.37 | 1652464 | 56534  | 50.269  |
|     |       | 3287241 | 169016 | 100.000 |

Peak rejection level: 20000

Fig S248. HPLC analysis of the racemic compound 2f,  
as a standard for comparison (Table 1, entry 6).

**D-2000 Elite HPLC System Manager Report**Analyzed Date and Time: 2015/03/13  
04:24 下午Reported Date and Time: 2015/05/14  
09:40 下午Processed Date and Time: 2015/05/14  
09:40 下午

Data Path: D:\LCH\DATA\0040\

Processing Method: test-IPA/Hx

System (acquisition): Sys 1

Series: 0040

Application(data): LCH

Vial Number: 2

Sample Name: LCH-2-386-chiral

Vial Type: UNK

Injection from this vial: 1 of 1

Volume: 20.0 ul

Sample Description: 10%IPA/Hx-1ml/min-col IB

Chrom Type: Fixed WL Chromatogram, 254 nm

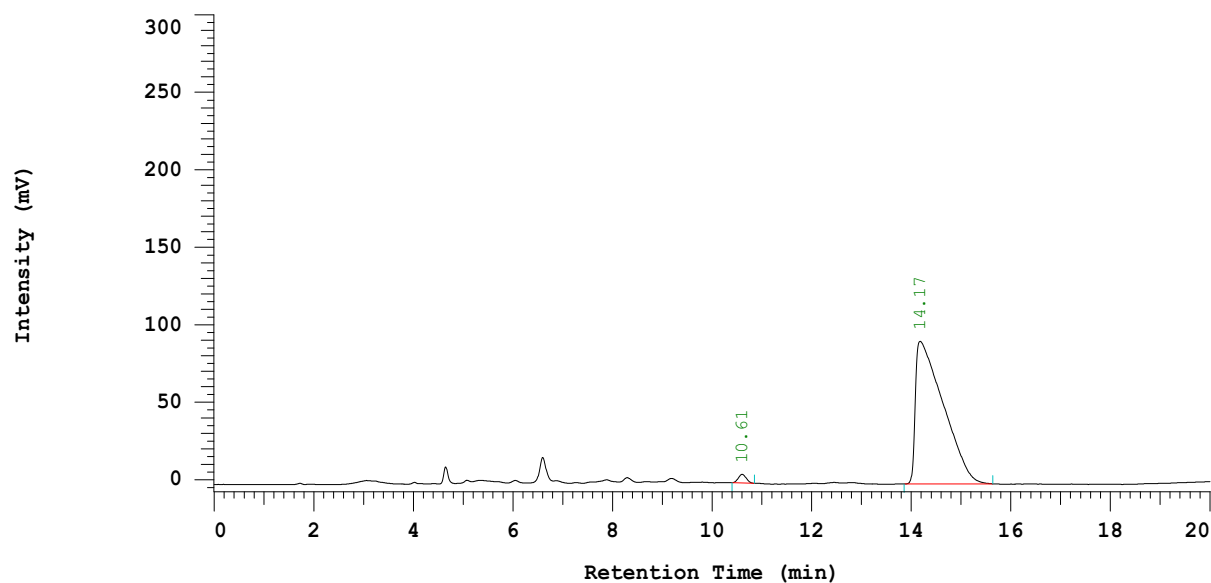

Processing Method: test-IPA/Hx

Column Type: IB

Method Developer: WL

Method Description:

Chrom Type: Fixed WL Chromatogram, 254 nm

Peak Quantitation: AREA

Calculation Method: EXT-STD

Scale Factor 1: 1.000

| No. | RT    | Area    | Height | Area %  |
|-----|-------|---------|--------|---------|
| 1   | 10.61 | 61835   | 5629   | 1.704   |
| 2   | 14.17 | 3567935 | 92012  | 98.296  |
|     |       | 3629770 | 97641  | 100.000 |

Peak rejection level: 10000

Fig S249. HPLC analysis of the chiral compound 2f obtained, (Table 1, entry 6).

**D-2000 Elite HPLC System Manager Report**Analyzed Date and Time: 2015/03/13  
04:45 下午Reported Date and Time: 2015/03/13  
05:07 下午Processed Date and Time: 2015/03/13  
05:06 下午

Data Path: D:\LCH\DATA\0041\

Processing Method: test-IPA/Hx

System (acquisition): Sys 1

Series: 0041

Application(data): LCH

Vial Number: 3

Sample Name: LCH-2-386-co

Vial Type: UNK

Injection from this vial: 1 of 1

Volume: 20.0 ul

Sample Description: 10%IPA/Hx-1ml/min-col IB

Chrom Type: Fixed WL Chromatogram, 254 nm

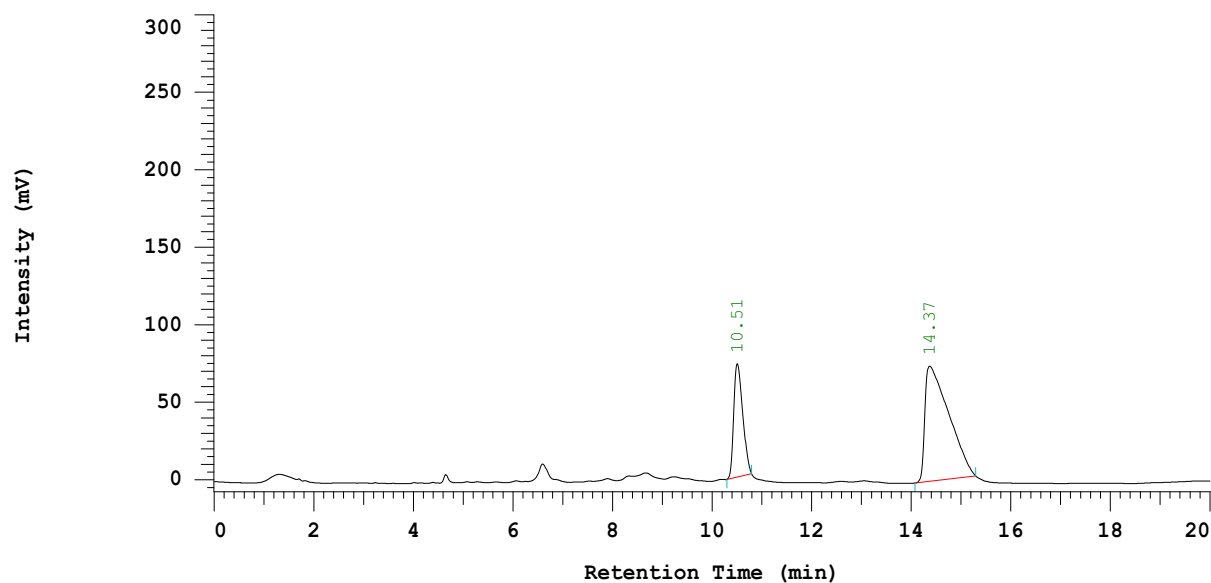

Processing Method: test-IPA/Hx

Column Type: IB

Method Developer: WL

Method Description:

Chrom Type: Fixed WL Chromatogram, 254 nm

Peak Quantitation: AREA

Calculation Method: EXT-STD

Scale Factor 1: 1.000

| No. | RT    | Area    | Height | Area %  |
|-----|-------|---------|--------|---------|
| 1   | 10.51 | 909069  | 72872  | 26.899  |
| 2   | 14.37 | 2470476 | 74395  | 73.101  |
|     |       | 3379545 | 147267 | 100.000 |

Peak rejection level: 20000

Fig S250. HPLC analysis of the mixture of chiral compound 2f obtained and the racemic compound 2f, for comparison (Table 1, entry 6).

**D-2000 Elite HPLC System Manager Report**Analyzed Date and Time: 2015/03/15  
11:25 下午Reported Date and Time: 2015/03/16  
12:07 上午Processed Date and Time: 2015/03/16  
12:07 上午

Data Path: D:\LCH\DATA\0056\

Processing Method: test-IPA/Hx

System (acquisition): Sys 1

Series: 0056

Application(data): LCH

Vial Number: 1

Sample Name: LCH-2-369-rac

Vial Type: UNK

Injection from this vial: 1 of 1

Volume: 20.0 ul

Sample Description: 10%IPA/Hx-1ml/min-col IB

Chrom Type: Fixed WL Chromatogram, 225 nm

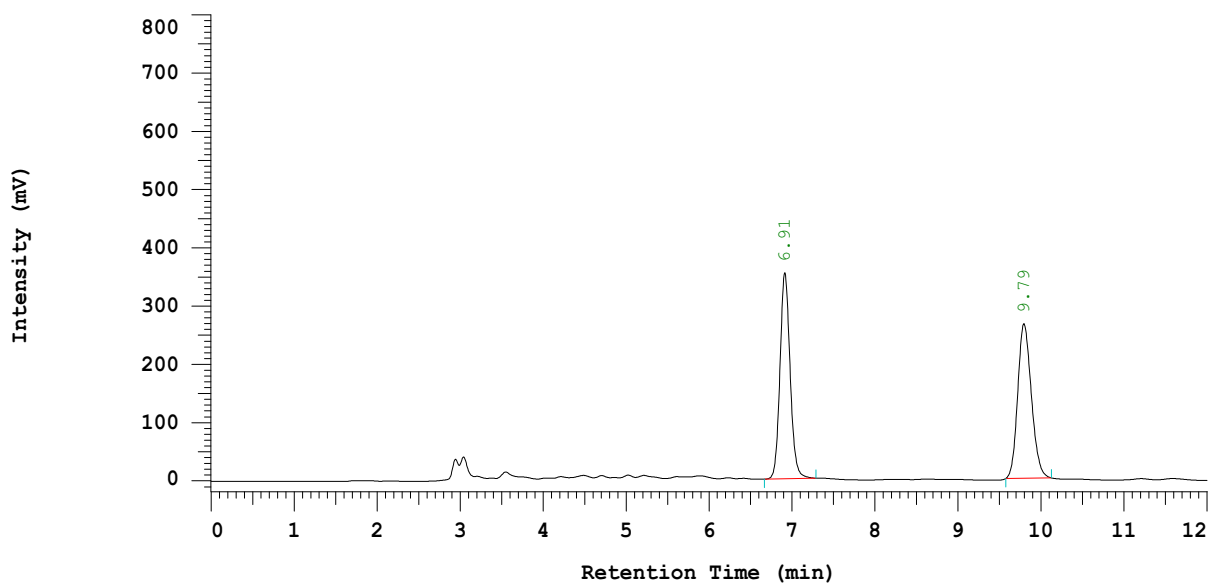

Processing Method: test-IPA/Hx

Column Type: IB

Method Developer: WL

Method Description:

Chrom Type: Fixed WL Chromatogram, 225 nm

Peak Quantitation: AREA

Calculation Method: EXT-STD

Scale Factor 1: 1.000

| No. | RT   | Area    | Height | Area %  |
|-----|------|---------|--------|---------|
| 1   | 6.91 | 2982874 | 353394 | 49.690  |
| 2   | 9.79 | 3020036 | 265506 | 50.310  |
|     |      | 6002910 | 618900 | 100.000 |

Peak rejection level: 20000

Fig S251. HPLC analysis of the racemic compound 2g,  
as a standard for comparison (Table 1, entry 7).

**D-2000 Elite HPLC System Manager Report**Analyzed Date and Time: 2015/03/16  
12:04 上午Reported Date and Time: 2015/04/02  
10:46 下午Processed Date and Time: 2015/04/02  
10:45 下午

Data Path: D:\LCH\DATA\0058\

Processing Method: test-IPA/Hx

System (acquisition): Sys 1

Series: 0058

Application(data): LCH

Vial Number: 1

Sample Name: LCH-2-369-chiral

Vial Type: UNK

Injection from this vial: 1 of 1

Volume: 20.0 ul

Sample Description: 10%IPA/Hx-1ml/min-col IB

Chrom Type: Fixed WL Chromatogram, 254 nm

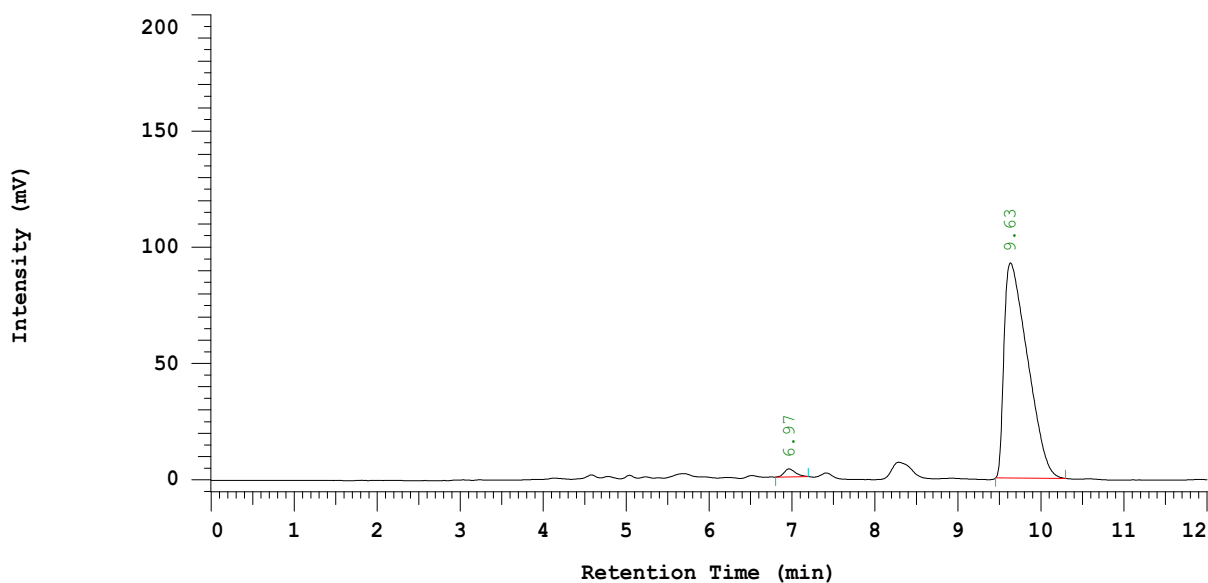

Processing Method: test-IPA/Hx

Column Type: IB

Method Developer: WL

Method Description:

Chrom Type: Fixed WL Chromatogram, 254 nm

Peak Quantitation: AREA

Calculation Method: EXT-STD

Scale Factor 1: 1.000

| No. | RT   | Area    | Height | Area %  |
|-----|------|---------|--------|---------|
| 1   | 6.97 | 32430   | 3450   | 1.756   |
| 2   | 9.63 | 1814235 | 92466  | 98.244  |
|     |      | 1846665 | 95916  | 100.000 |

Peak rejection level: 20000

Fig S252. HPLC analysis of the chiral compound 2g obtained, (Table 1, entry 7).



**D-2000 Elite HPLC System Manager Report**Analyzed Date and Time: 2015/03/16  
12:37 上午Reported Date and Time: 2015/03/16  
12:51 上午Processed Date and Time: 2015/03/16  
12:51 上午

Data Path: D:\LCH\DATA\0060\

Processing Method: test-IPA/Hx

System (acquisition): Sys 1

Series: 0060

Application(data): LCH

Vial Number: 3

Sample Name: LCH-2-369-co

Vial Type: UNK

Injection from this vial: 1 of 1

Volume: 20.0 ul

Sample Description: 10%IPA/Hx-1ml/min-col IB

Chrom Type: Fixed WL Chromatogram, 225 nm

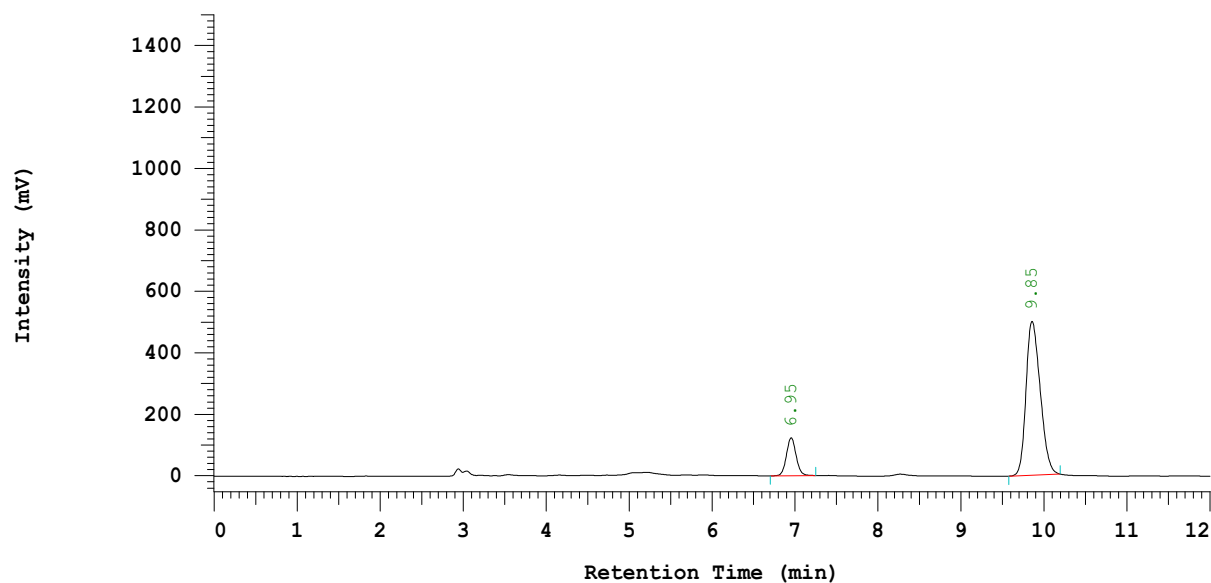

Processing Method: test-IPA/Hx

Column Type: IB

Method Developer: WL

Method Description:

Chrom Type: Fixed WL Chromatogram, 225 nm

Peak Quantitation: AREA

Calculation Method: EXT-STD

Scale Factor 1: 1.000

| No. | RT   | Area    | Height | Area %  |
|-----|------|---------|--------|---------|
| 1   | 6.95 | 1000607 | 123762 | 14.399  |
| 2   | 9.85 | 5948759 | 500921 | 85.601  |
|     |      | 6949366 | 624683 | 100.000 |

Peak rejection level: 20000

**Fig S253.** HPLC analysis of the mixture of chiral compound 2g obtained and the racemic compound 2g, for comparison (Table 1, entry 7).

**D-2000 Elite HPLC System Manager Report**Analyzed Date and Time: 2015/03/07  
12:50 上午Reported Date and Time: 2015/04/30  
12:32 上午Processed Date and Time: 2015/04/30  
12:32 上午

Data Path: D:\LCH\DATA\0030\

Processing Method: test-IPA/Hx

System (acquisition): Sys 1

Series: 0030

Application(data): LCH

Vial Number: 1

Sample Name: LCH-2-287-rac

Vial Type: UNK

Injection from this vial: 1 of 1

Volume: 20.0 ul

Sample Description: 10%IPA/Hx-1ml/min-col IB

Chrom Type: Fixed WL Chromatogram, 238 nm

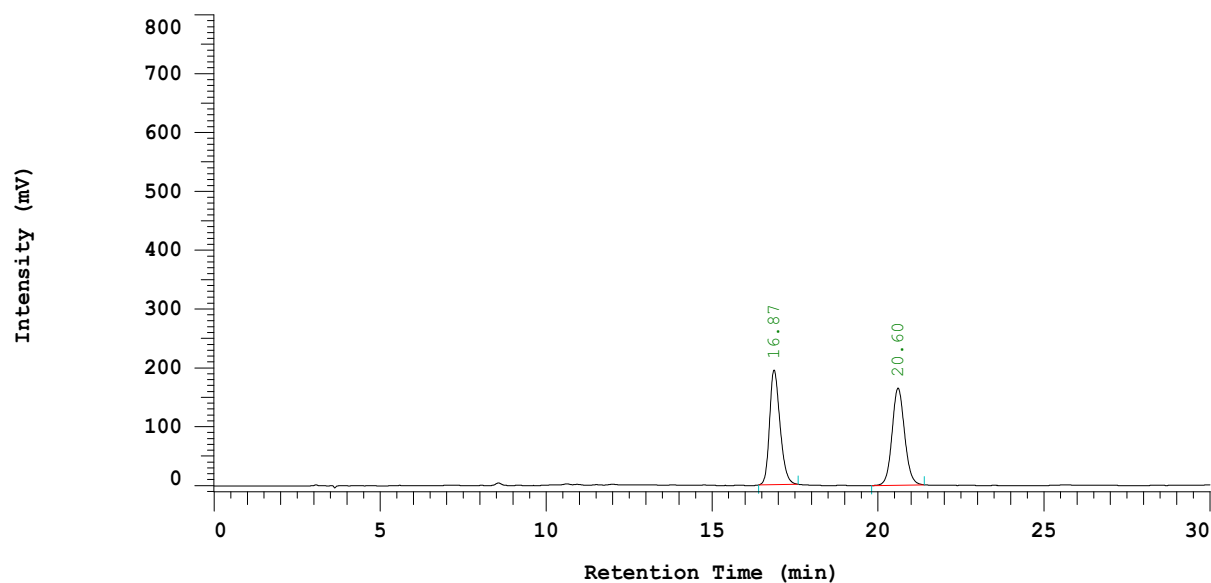

Processing Method: test-IPA/Hx

Column Type: IB

Method Developer: WL

Method Description:

Chrom Type: Fixed WL Chromatogram, 238 nm

Peak Quantitation: AREA

Calculation Method: EXT-STD

Scale Factor 1: 1.000

| No. | RT    | Area    | Height | Area %  |
|-----|-------|---------|--------|---------|
| 1   | 16.87 | 4235650 | 195107 | 49.727  |
| 2   | 20.60 | 4282184 | 164949 | 50.273  |
|     |       | 8517834 | 360056 | 100.000 |

Peak rejection level: 20000

**Fig S254. HPLC analysis of the racemic compound 2h, as a standard for comparison (Table 1, entry 8).**

**D-2000 Elite HPLC System Manager Report**Analyzed Date and Time: 2015/03/07  
01:22 上午Reported Date and Time: 2015/05/27  
07:43 下午Processed Date and Time: 2015/05/27  
07:42 下午

Data Path: D:\LCH\DATA\0031\

Processing Method: test-IPA/Hx

System (acquisition): Sys 1

Series: 0031

Application(data): LCH

Vial Number: 2

Sample Name: LCH-2-287-chiral

Vial Type: UNK

Injection from this vial: 1 of 1

Volume: 20.0 ul

Sample Description: 10%IPA/Hx-1ml/min-col IB

Chrom Type: Fixed WL Chromatogram, 238 nm

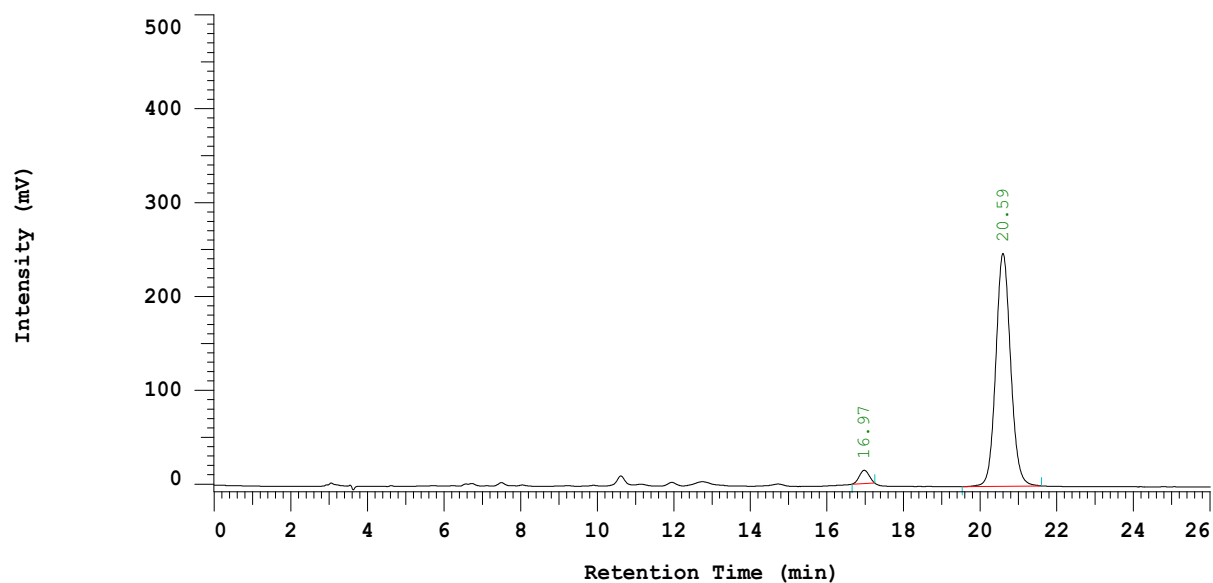

Processing Method: test-IPA/Hx

Column Type: IB

Method Developer: WL

Method Description:

Chrom Type: Fixed WL Chromatogram, 238 nm

Peak Quantitation: AREA

Calculation Method: EXT-STD

Scale Factor 1: 1.000

| No. | RT    | Area    | Height | Area %  |
|-----|-------|---------|--------|---------|
| 1   | 16.97 | 248557  | 14233  | 3.622   |
| 2   | 20.59 | 6613528 | 247824 | 96.378  |
|     |       | 6862085 | 262057 | 100.000 |

Peak rejection level: 10000

Fig S255. HPLC analysis of the chiral compound 2h obtained, (Table 1, entry 8).

**D-2000 Elite HPLC System Manager Report**Analyzed Date and Time: 2015/03/07  
01:55 上午Reported Date and Time: 2015/04/30  
12:33 上午Processed Date and Time: 2015/04/30  
12:33 上午

Data Path: D:\LCH\DATA\0032\

Processing Method: test-IPA/Hx

System (acquisition): Sys 1

Series: 0032

Application(data): LCH

Vial Number: 3

Sample Name: LCH-2-287-co

Vial Type: UNK

Injection from this vial: 1 of 1

Volume: 20.0 ul

Sample Description: 10%IPA/Hx-1ml/min-col IB

Chrom Type: Fixed WL Chromatogram, 238 nm

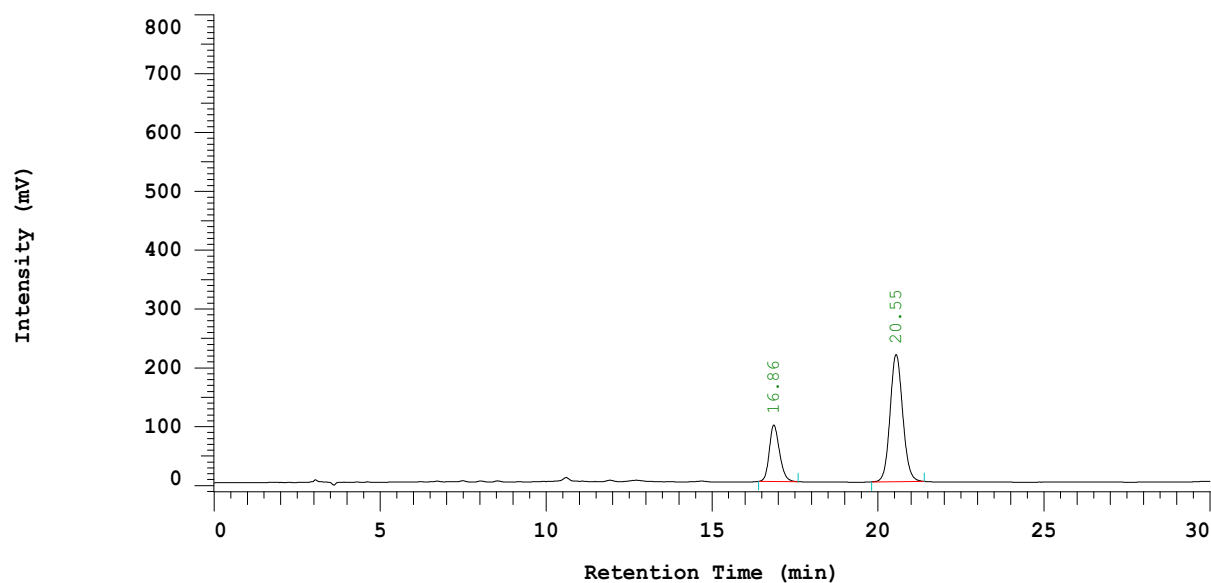

Processing Method: test-IPA/Hx

Column Type: IB

Method Developer: WL

Method Description:

Chrom Type: Fixed WL Chromatogram, 238 nm

Peak Quantitation: AREA

Calculation Method: EXT-STD

Scale Factor 1: 1.000

| No. | RT    | Area    | Height | Area %  |
|-----|-------|---------|--------|---------|
| 1   | 16.86 | 2045501 | 95989  | 26.507  |
| 2   | 20.55 | 5671227 | 216163 | 73.493  |
|     |       | 7716728 | 312152 | 100.000 |

Peak rejection level: 20000

**Fig S256.** HPLC analysis of the mixture of chiral compound 2h obtained and the racemic compound 2h, for comparison (Table 1, entry 8).

**D-2000 Elite HPLC System Manager Report**Analyzed Date and Time: 2015/03/15  
09:14 下午Reported Date and Time: 2015/03/15  
09:39 下午Processed Date and Time: 2015/03/15  
09:39 下午

Data Path: D:\LCH\DATA\0052\

Processing Method: test-IPA/Hx

System (acquisition): Sys 1

Series: 0052

Application(data): LCH

Vial Number: 1

Sample Name: LCH-2-383-rac

Vial Type: UNK

Injection from this vial: 1 of 1

Volume: 20.0 ul

Sample Description: 5%IPA/Hx-1ml/min-col IB

Chrom Type: Fixed WL Chromatogram, 254 nm

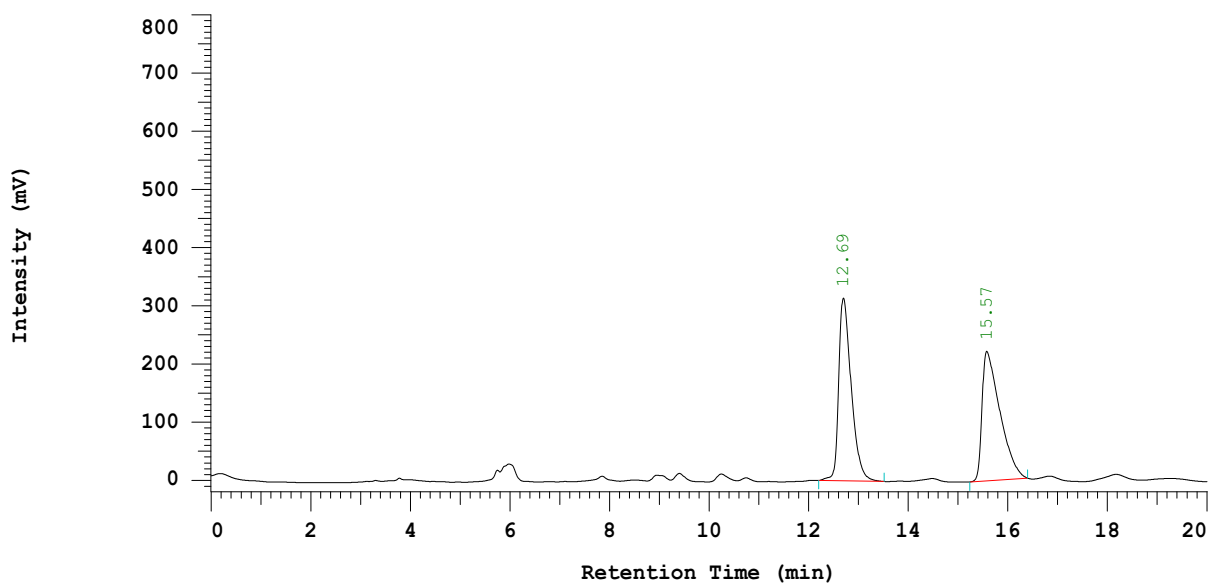

Processing Method: test-IPA/Hx

Column Type: IB

Method Developer: WL

Method Description:

Chrom Type: Fixed WL Chromatogram, 254 nm

Peak Quantitation: AREA

Calculation Method: EXT-STD

Scale Factor 1: 1.000

| No. | RT    | Area     | Height | Area %  |
|-----|-------|----------|--------|---------|
| 1   | 12.69 | 5494214  | 314179 | 49.643  |
| 2   | 15.57 | 5573252  | 222546 | 50.357  |
|     |       | 11067466 | 536725 | 100.000 |

Peak rejection level: 20000

Fig S257. HPLC analysis of the racemic compound 2i,  
as a standard for comparison (Table 1, entry 9).

**D-2000 Elite HPLC System Manager Report**Analyzed Date and Time: 2015/03/15  
10:43 下午Reported Date and Time: 2015/05/14  
09:29 下午Processed Date and Time: 2015/05/14  
09:29 下午

Data Path: D:\LCH\DATA\0055\

Processing Method: test-IPA/Hx

System (acquisition): Sys 1

Series: 0055

Application(data): LCH

Vial Number: 1

Sample Name: LCH-2-383-chiral

Vial Type: UNK

Injection from this vial: 1 of 1

Volume: 20.0 ul

Sample Description: 5%IPA/Hx-1ml/min-col IB

Chrom Type: Fixed WL Chromatogram, 254 nm

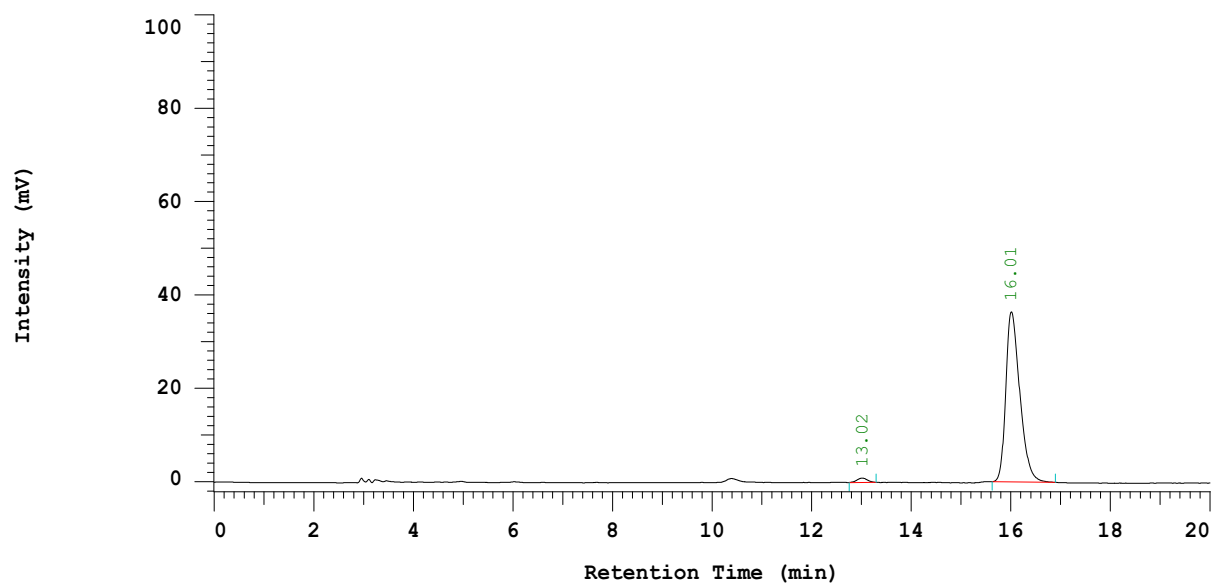

Processing Method: test-IPA/Hx

Column Type: IB

Method Developer: WL

Method Description:

Chrom Type: Fixed WL Chromatogram, 254 nm

Peak Quantitation: AREA

Calculation Method: EXT-STD

Scale Factor 1: 1.000

| No. | RT    | Area   | Height | Area %  |
|-----|-------|--------|--------|---------|
| 1   | 13.02 | 13479  | 927    | 1.857   |
| 2   | 16.01 | 712503 | 36384  | 98.143  |
|     |       | 725982 | 37311  | 100.000 |

Peak rejection level: 10000

Fig S258. HPLC analysis of the chiral compound 2i obtained, (Table 1, entry 9).

**D-2000 Elite HPLC System Manager Report**Analyzed Date and Time: 2015/03/15  
09:58 下午Reported Date and Time: 2015/03/15  
10:27 下午Processed Date and Time: 2015/03/15  
10:27 下午

Data Path: D:\LCH\DATA\0054\

Processing Method: test-IPA/Hx

System (acquisition): Sys 1

Series: 0054

Application(data): LCH

Vial Number: 3

Sample Name: LCH-2-383-co

Vial Type: UNK

Injection from this vial: 1 of 1

Volume: 20.0 ul

Sample Description: 5%IPA/Hx-1ml/min-col IB

Chrom Type: Fixed WL Chromatogram, 254 nm

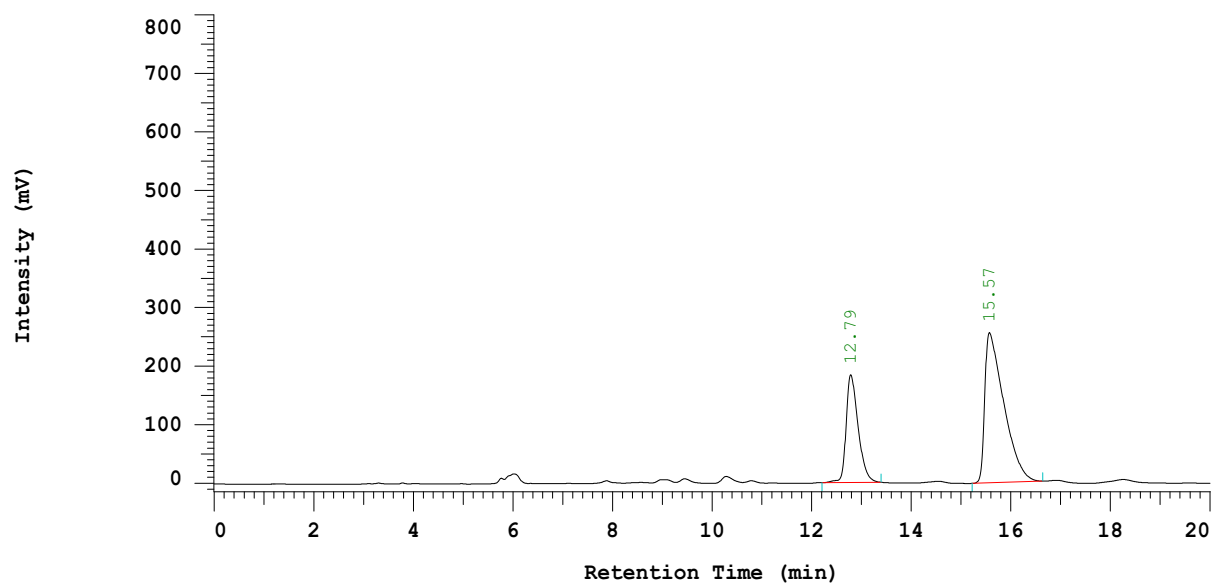

Processing Method: test-IPA/Hx

Column Type: IB

Method Developer: WL

Method Description:

Chrom Type: Fixed WL Chromatogram, 254 nm

Peak Quantitation: AREA

Calculation Method: EXT-STD

Scale Factor 1: 1.000

| No. | RT    | Area    | Height | Area %  |
|-----|-------|---------|--------|---------|
| 1   | 12.79 | 3085049 | 184151 | 31.077  |
| 2   | 15.57 | 6842001 | 256654 | 68.923  |
|     |       | 9927050 | 440805 | 100.000 |

Peak rejection level: 20000

Fig S259. HPLC analysis of the mixture of chiral compound 2i obtained and the racemic compound 2i, for comparison (Table 1, entry 9).

**D-2000 Elite HPLC System Manager Report**Analyzed Date and Time: 2015/04/23  
09:31 下午Reported Date and Time: 2015/04/23  
10:09 下午Processed Date and Time: 2015/04/23  
10:09 下午

Data Path: D:\LCH\DATA\0139\

Processing Method: Ea/Hx

System (acquisition): Sys 1

Series: 0139

Application(data): LCH

Vial Number: 1

Sample Name: LCH-2-308-p1-rac

Vial Type: UNK

Injection from this vial: 1 of 1

Volume: 20.0 ul

Sample Description: 10%Ea/Hx-1ml/min-col IC

Chrom Type: Fixed WL Chromatogram, 300 nm

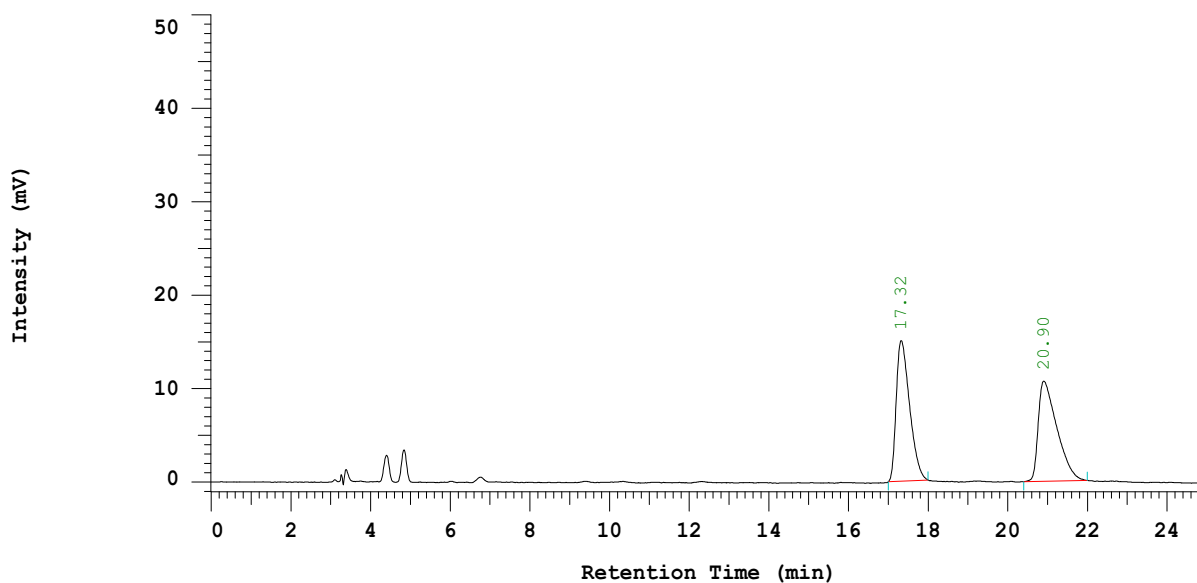

Processing Method: Ea/Hx

Column Type: IC

Method Developer: YVW

Method Description:

Chrom Type: Fixed WL Chromatogram, 300 nm

Peak Quantitation: AREA

Calculation Method: EXT-STD

Scale Factor 1: 1.000

| No. | RT    | Area   | Height | Area %  |
|-----|-------|--------|--------|---------|
| 1   | 17.32 | 349089 | 15055  | 49.995  |
| 2   | 20.90 | 349154 | 10714  | 50.005  |
|     |       | 698243 | 25769  | 100.000 |

Peak rejection level: 10000

Fig S260. HPLC analysis of the racemic compound syn-3a,  
as a standard for comparison (Table 3, entry 1).



**D-2000 Elite HPLC System Manager Report**Analyzed Date and Time: 2015/04/23  
09:57 下午Reported Date and Time: 2015/04/23  
11:43 下午Processed Date and Time: 2015/04/23  
11:43 下午

Data Path: D:\LCH\DATA\0140\

Processing Method: Ea/Hx

System (acquisition): Sys 1

Series: 0140

Application(data): LCH

Vial Number: 2

Sample Name: LCH-2-308-p1-chi

Vial Type: UNK

Injection from this vial: 1 of 1

Volume: 20.0 ul

Sample Description: 10%Ea/Hx-1ml/min-col IC

Chrom Type: Fixed WL Chromatogram, 300 nm

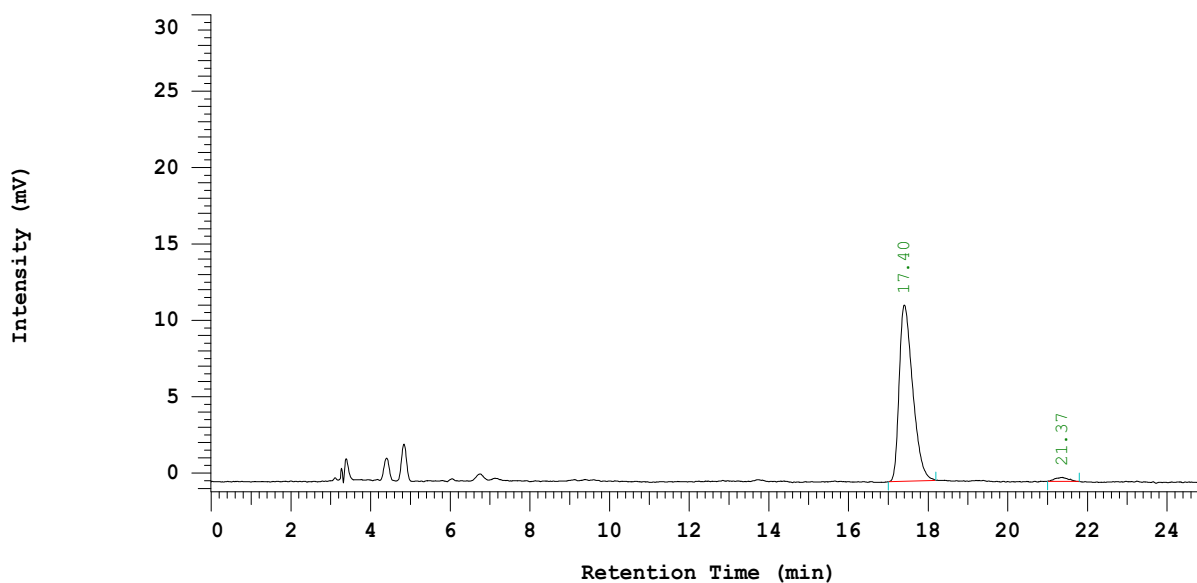

Processing Method: Ea/Hx

Column Type: IC

Method Developer: YVW

Method Description:

Chrom Type: Fixed WL Chromatogram, 300 nm

Peak Quantitation: AREA

Calculation Method: EXT-STD

Scale Factor 1: 1.000

| No. | RT    | Area   | Height | Area %  |
|-----|-------|--------|--------|---------|
| 1   | 17.40 | 269907 | 11531  | 97.826  |
| 2   | 21.37 | 5997   | 263    | 2.174   |
|     |       | 275904 | 11794  | 100.000 |

Peak rejection level: 1000

Fig S261 HPLC analysis of the chiral compound syn-3a obtained, (Table 3, entry 1).

**D-2000 Elite HPLC System Manager Report**Analyzed Date and Time: 2015/04/23  
10:24 下午Reported Date and Time: 2015/04/23  
10:52 下午Processed Date and Time: 2015/04/23  
10:52 下午

Data Path: D:\LCH\DATA\0141\

Processing Method: Ea/Hx

System (acquisition): Sys 1

Series: 0141

Application(data): LCH

Vial Number: 3

Sample Name: LCH-2-308-p1-co

Vial Type: UNK

Injection from this vial: 1 of 1

Volume: 20.0 ul

Sample Description: 10%Ea/Hx-1ml/min-col IC

Chrom Type: Fixed WL Chromatogram, 300 nm

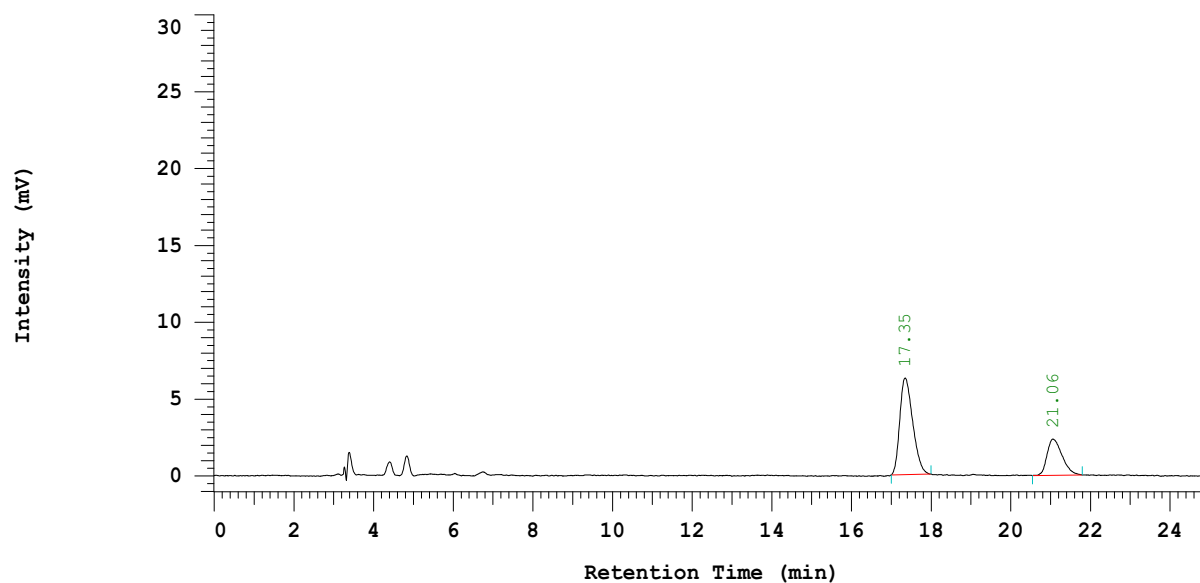

Processing Method: Ea/Hx

Column Type: IC

Method Developer: YVW

Method Description:

Chrom Type: Fixed WL Chromatogram, 300 nm

Peak Quantitation: AREA

Calculation Method: EXT-STD

Scale Factor 1: 1.000

| No. | RT    | Area   | Height | Area %  |
|-----|-------|--------|--------|---------|
| 1   | 17.35 | 140953 | 6284   | 69.560  |
| 2   | 21.06 | 61683  | 2357   | 30.440  |
|     |       | 202636 | 8641   | 100.000 |

Peak rejection level: 1000

Fig S262. HPLC analysis of the mixture of chiral compound syn-3a obtained and the racemic compound syn-3a, for comparison (Table 3, entry 1).

**D-2000 Elite HPLC System Manager Report**Analyzed Date and Time: 2015/04/23  
11:47 下午Reported Date and Time: 2015/04/24  
12:14 上午Processed Date and Time: 2015/04/24  
12:14 上午

Data Path: D:\LCH\DATA\0144\

Processing Method: Ea/Hx

System (acquisition): Sys 1

Series: 0144

Application(data): LCH

Vial Number: 3

Sample Name: LCH-2-308-p2-rac

Vial Type: UNK

Injection from this vial: 1 of 1

Volume: 20.0 ul

Sample Description: 15%Ea/Hx-1ml/min-col IC

Chrom Type: Fixed WL Chromatogram, 254 nm

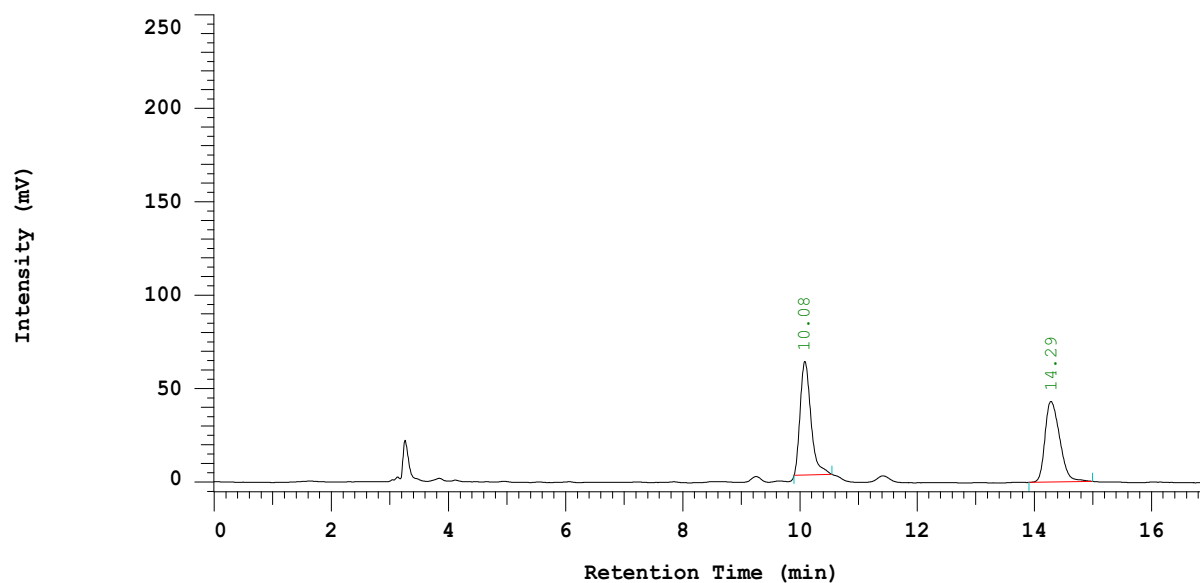

Processing Method: Ea/Hx

Column Type: IC

Method Developer: YVW

Method Description:

Chrom Type: Fixed WL Chromatogram, 254 nm

Peak Quantitation: AREA

Calculation Method: EXT-STD

Scale Factor 1: 1.000

| No. | RT    | Area    | Height | Area %  |
|-----|-------|---------|--------|---------|
| 1   | 10.08 | 776979  | 60682  | 50.597  |
| 2   | 14.29 | 758640  | 43194  | 49.403  |
|     |       | 1535619 | 103876 | 100.000 |

Peak rejection level: 1000

**Fig S263. HPLC analysis of the racemic compound anti-3a, as a standard for comparison (Table 3, entry 1).**

**D-2000 Elite HPLC System Manager Report**Analyzed Date and Time: 2015/04/23  
11:08 下午Reported Date and Time: 2015/05/14  
09:58 下午Processed Date and Time: 2015/05/14  
09:57 下午

Data Path: D:\LCH\DATA\0142\

Processing Method: Ea/Hx

System (acquisition): Sys 1

Series: 0142

Application(data): LCH

Vial Number: 1

Sample Name: LCH-2-308-p2-chi

Vial Type: UNK

Injection from this vial: 1 of 1

Volume: 20.0 ul

Sample Description: 15%Ea/Hx-1ml/min-col IC

Chrom Type: Fixed WL Chromatogram, 254 nm

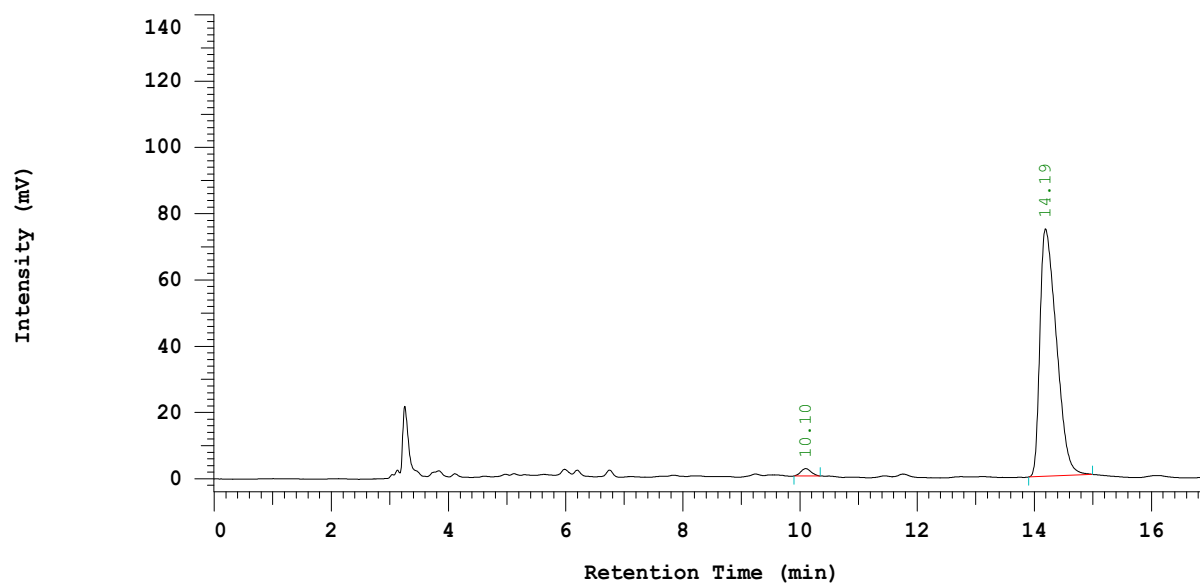

Processing Method: Ea/Hx

Column Type: IC

Method Developer: YVW

Method Description:

Chrom Type: Fixed WL Chromatogram, 254 nm

Peak Quantitation: AREA

Calculation Method: EXT-STD

Scale Factor 1: 1.000

| No. | RT    | Area    | Height | Area %  |
|-----|-------|---------|--------|---------|
| 1   | 10.10 | 27073   | 2231   | 1.820   |
| 2   | 14.19 | 1460646 | 74626  | 98.180  |
|     |       | 1487719 | 76857  | 100.000 |

Peak rejection level: 1000

Fig S264. HPLC analysis of the chiral compound anti-3a obtained, (Table 3, entry 1).

**D-2000 Elite HPLC System Manager Report**Analyzed Date and Time: 2015/04/23  
11:28 下午Reported Date and Time: 2015/04/23  
11:53 下午Processed Date and Time: 2015/04/23  
11:53 下午

Data Path: D:\LCH\DATA\0143\

Processing Method: Ea/Hx

System (acquisition): Sys 1

Series: 0143

Application(data): LCH

Vial Number: 2

Sample Name: LCH-2-308-p2-co

Vial Type: UNK

Injection from this vial: 1 of 1

Volume: 20.0 ul

Sample Description: 15%Ea/Hx-1ml/min-col IC

Chrom Type: Fixed WL Chromatogram, 254 nm

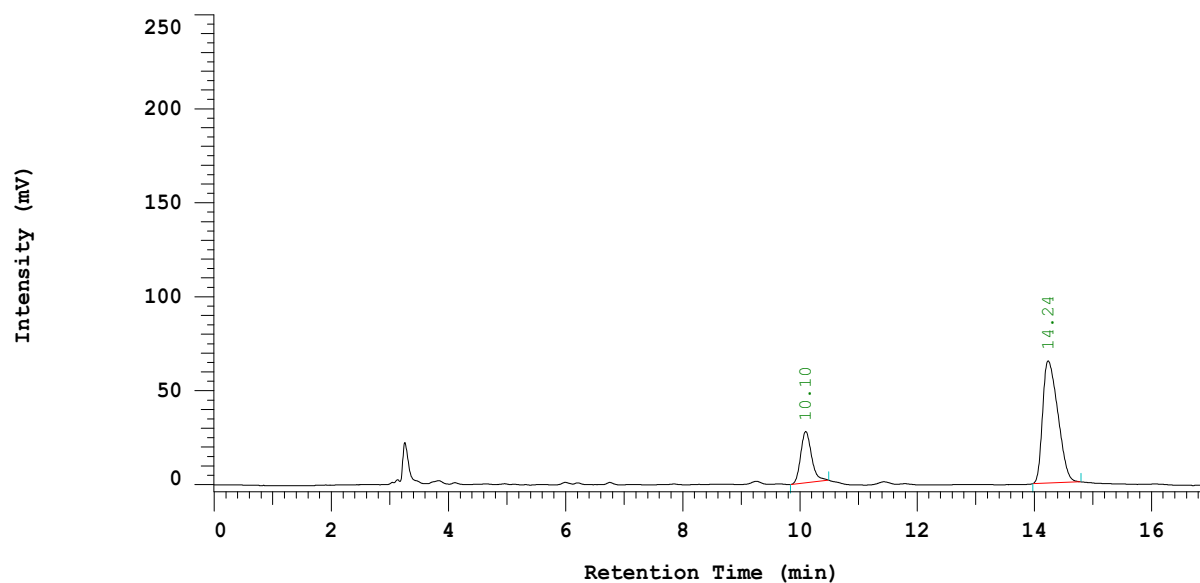

Processing Method: Ea/Hx

Column Type: IC

Method Developer: YVW

Method Description:

Chrom Type: Fixed WL Chromatogram, 254 nm

Peak Quantitation: AREA

Calculation Method: EXT-STD

Scale Factor 1: 1.000

| No. | RT    | Area    | Height | Area %  |
|-----|-------|---------|--------|---------|
| 1   | 10.10 | 351832  | 27301  | 22.987  |
| 2   | 14.24 | 1178714 | 64963  | 77.013  |
|     |       | 1530546 | 92264  | 100.000 |

Peak rejection level: 1000

**Fig S265. HPLC analysis of the mixture of chiral compound anti-3a obtained and the racemic compound anti-3a, for comparison (Table 3, entry 1).**

**D-2000 Elite HPLC System Manager Report**Analyzed Date and Time: 2015/05/01  
03:20 下午Reported Date and Time: 2015/05/01  
03:44 下午Processed Date and Time: 2015/05/01  
03:43 下午

Data Path: D:\LCH\DATA\0186\

Processing Method: Ea/Hx

System (acquisition): Sys 1

Series: 0186

Application(data): LCH

Vial Number: 1

Sample Name: LCH-2-375-p1-rac

Vial Type: UNK

Injection from this vial: 1 of 1

Volume: 20.0 ul

Sample Description: 10%Ea/Hx-1ml/min-col IC

Chrom Type: Fixed WL Chromatogram, 300 nm

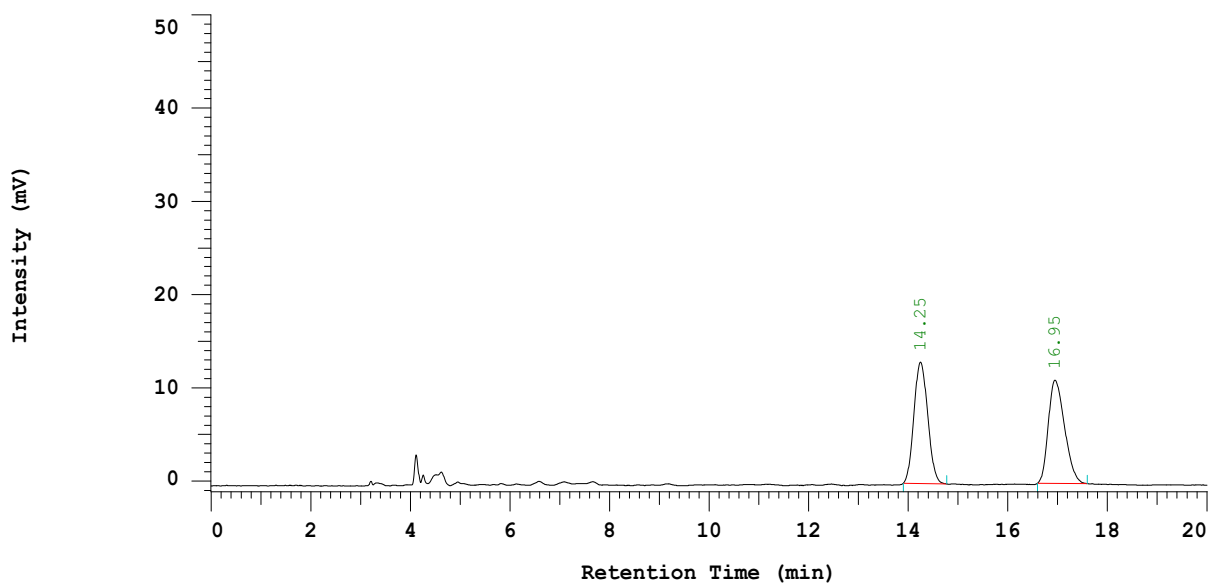

Processing Method: Ea/Hx

Column Type: IC

Method Developer: YVW

Method Description:

Chrom Type: Fixed WL Chromatogram, 300 nm

Peak Quantitation: AREA

Calculation Method: EXT-STD

Scale Factor 1: 1.000

| No. | RT    | Area   | Height | Area %  |
|-----|-------|--------|--------|---------|
| 1   | 14.25 | 251538 | 13003  | 50.088  |
| 2   | 16.95 | 250657 | 11062  | 49.912  |
|     |       | 502195 | 24065  | 100.000 |

Peak rejection level: 1000

Fig S266. HPLC analysis of the racemic compound syn-3b,  
as a standard for comparison (Table 3, entry 2).

**D-2000 Elite HPLC System Manager Report**Analyzed Date and Time: 2015/05/01  
03:41 下午Reported Date and Time: 2015/05/01  
04:07 下午Processed Date and Time: 2015/05/01  
04:07 下午

Data Path: D:\LCH\DATA\0187\

Processing Method: Ea/Hx

System (acquisition): Sys 1

Series: 0187

Application(data): LCH

Vial Number: 2

Sample Name: LCH-2-375-p1-chi

Vial Type: UNK

Injection from this vial: 1 of 1

Volume: 20.0 ul

Sample Description: 10%Ea/Hx-1ml/min-col IC

Chrom Type: Fixed WL Chromatogram, 300 nm

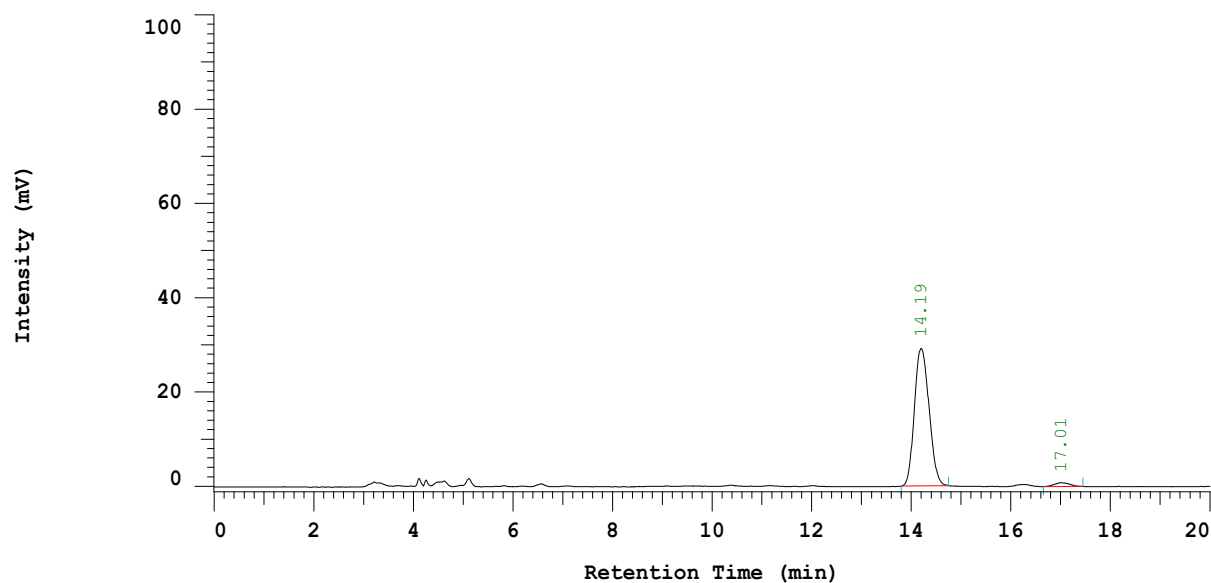

Processing Method: Ea/Hx

Column Type: IC

Method Developer: YVW

Method Description:

Chrom Type: Fixed WL Chromatogram, 300 nm

Peak Quantitation: AREA

Calculation Method: EXT-STD

Scale Factor 1: 1.000

| No. | RT    | Area   | Height | Area %  |
|-----|-------|--------|--------|---------|
| 1   | 14.19 | 595134 | 29120  | 97.351  |
| 2   | 17.01 | 16191  | 775    | 2.649   |
|     |       | 611325 | 29895  | 100.000 |

Peak rejection level: 1000

Fig S267. HPLC analysis of the chiral compound syn-3b obtained, (Table 3, entry 2).

**D-2000 Elite HPLC System Manager Report**Analyzed Date and Time: 2015/05/01  
04:02 下午Reported Date and Time: 2015/05/01  
04:27 下午Processed Date and Time: 2015/05/01  
04:27 下午

Data Path: D:\LCH\DATA\0188\

Processing Method: Ea/Hx

System (acquisition): Sys 1

Series: 0188

Application(data): LCH

Vial Number: 3

Sample Name: LCH-2-375-p1-co

Vial Type: UNK

Injection from this vial: 1 of 1

Volume: 20.0 ul

Sample Description: 10%Ea/Hx-1ml/min-col IC

Chrom Type: Fixed WL Chromatogram, 300 nm

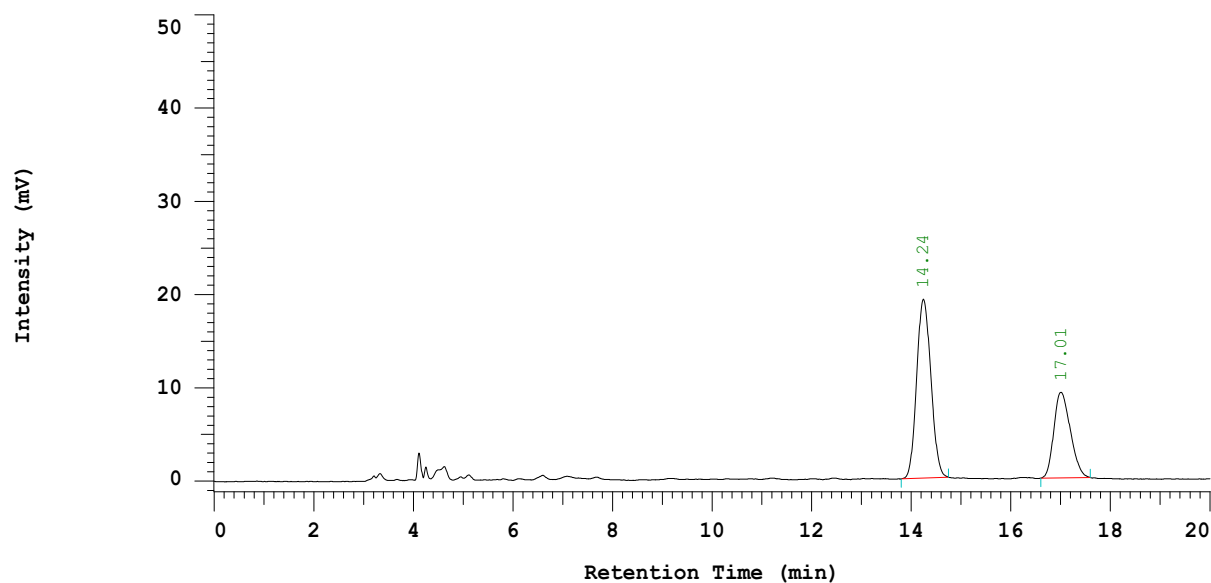

Processing Method: Ea/Hx

Column Type: IC

Method Developer: YVW

Method Description:

Chrom Type: Fixed WL Chromatogram, 300 nm

Peak Quantitation: AREA

Calculation Method: EXT-STD

Scale Factor 1: 1.000

| No. | RT    | Area   | Height | Area %  |
|-----|-------|--------|--------|---------|
| 1   | 14.24 | 380977 | 19164  | 64.287  |
| 2   | 17.01 | 211643 | 9184   | 35.713  |
|     |       | 592620 | 28348  | 100.000 |

Peak rejection level: 1000

**Fig S268. HPLC analysis of the mixture of chiral compound syn-3b obtained and the racemic compound syn-3b for comparison (Table 3, entry 2).**



**D-2000 Elite HPLC System Manager Report**Analyzed Date and Time: 2015/05/01  
04:54 下午Reported Date and Time: 2015/05/01  
05:20 下午Processed Date and Time: 2015/05/01  
05:19 下午

Data Path: D:\LCH\DATA\0189\

Processing Method: Ea/Hx

System (acquisition): Sys 1

Series: 0189

Application(data): LCH

Vial Number: 1

Sample Name: LCH-2-375-p2-rac

Vial Type: UNK

Injection from this vial: 1 of 1

Volume: 20.0 ul

Sample Description: 10%Ea/Hx-1ml/min-col IC

Chrom Type: Fixed WL Chromatogram, 254 nm

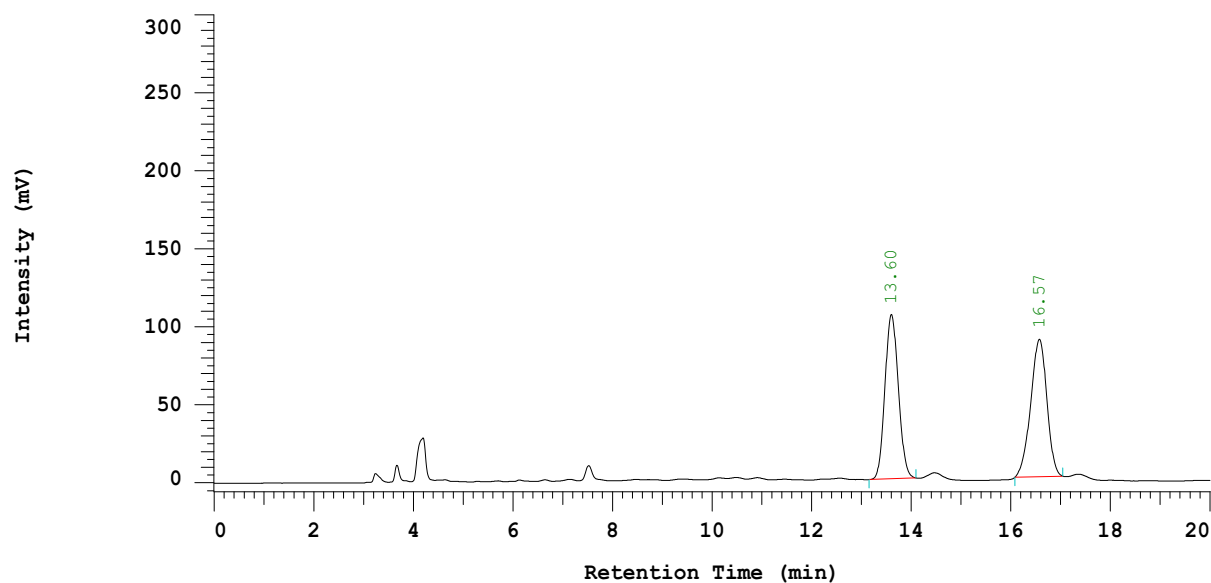

Processing Method: Ea/Hx

Column Type: IC

Method Developer: YVW

Method Description:

Chrom Type: Fixed WL Chromatogram, 254 nm

Peak Quantitation: AREA

Calculation Method: EXT-STD

Scale Factor 1: 1.000

| No. | RT    | Area    | Height | Area %  |
|-----|-------|---------|--------|---------|
| 1   | 13.60 | 1969948 | 105280 | 49.658  |
| 2   | 16.57 | 1997048 | 88086  | 50.342  |
|     |       | 3966996 | 193366 | 100.000 |

Peak rejection level: 1000

Fig S269. HPLC analysis of the racemic compound anti-3b, as a standard for comparison (Table 3, entry 2).

**D-2000 Elite HPLC System Manager Report**Analyzed Date and Time: 2015/05/01  
07:04 下午Reported Date and Time: 2015/05/01  
07:33 下午Processed Date and Time: 2015/05/01  
07:32 下午

Data Path: D:\LCH\DATA\0193\

Processing Method: Ea/Hx

System (acquisition): Sys 1

Series: 0193

Application(data): LCH

Vial Number: 1

Sample Name: LCH-2-375-p2-chi

Vial Type: UNK

Injection from this vial: 1 of 1

Volume: 20.0 ul

Sample Description: 10%Ea/Hx-1ml/min-col IC

Chrom Type: Fixed WL Chromatogram, 254 nm

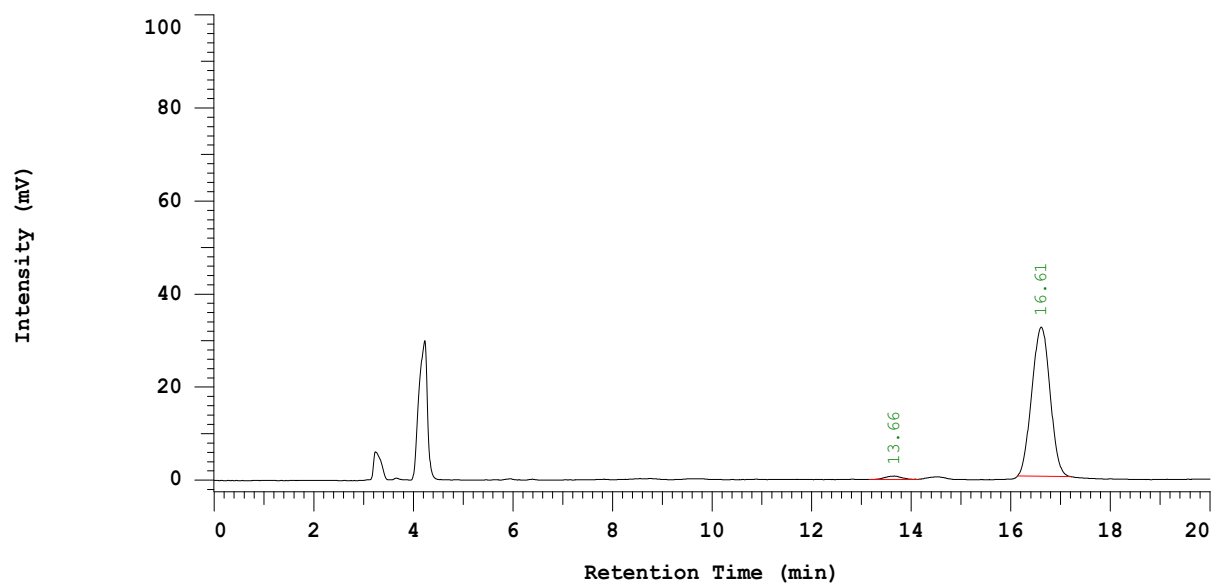

Processing Method: Ea/Hx

Column Type: IC

Method Developer: YVW

Method Description:

Chrom Type: Fixed WL Chromatogram, 254 nm

Peak Quantitation: AREA

Calculation Method: EXT-STD

Scale Factor 1: 1.000

| No. | RT    | Area   | Height | Area %  |
|-----|-------|--------|--------|---------|
| 1   | 13.66 | 16837  | 730    | 2.013   |
| 2   | 16.61 | 819775 | 32016  | 97.987  |
|     |       | 836612 | 32746  | 100.000 |

Peak rejection level: 1000

Fig S270. HPLC analysis of the chiral compound anti-3b obtained, (Table 3, entry 2).

**D-2000 Elite HPLC System Manager Report**Analyzed Date and Time: 2015/05/01  
07:26 下午Reported Date and Time: 2015/05/01  
07:49 下午Processed Date and Time: 2015/05/01  
07:49 下午

Data Path: D:\LCH\DATA\0194\

Processing Method: Ea/Hx

System (acquisition): Sys 1

Series: 0194

Application(data): LCH

Vial Number: 2

Sample Name: LCH-2-375-p2-co

Vial Type: UNK

Injection from this vial: 1 of 1

Volume: 20.0 ul

Sample Description: 10%Ea/Hx-1ml/min-col IC

Chrom Type: Fixed WL Chromatogram, 254 nm

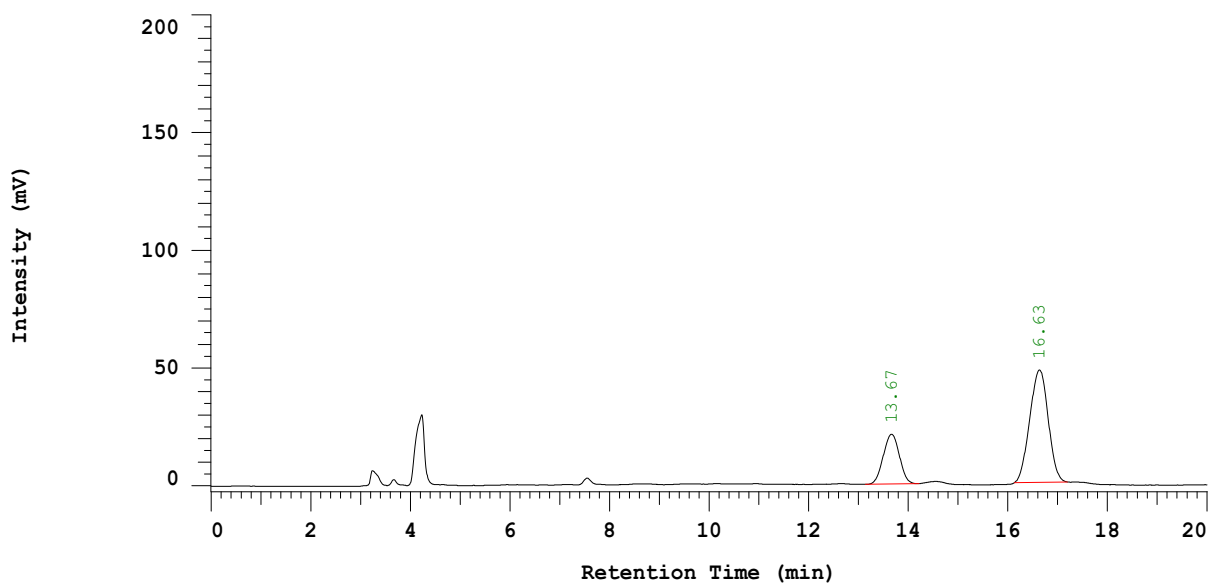

Processing Method: Ea/Hx

Column Type: IC

Method Developer: YVW

Method Description:

Chrom Type: Fixed WL Chromatogram, 254 nm

Peak Quantitation: AREA

Calculation Method: EXT-STD

Scale Factor 1: 1.000

| No. | RT    | Area    | Height | Area %  |
|-----|-------|---------|--------|---------|
| 1   | 13.67 | 474193  | 21059  | 27.698  |
| 2   | 16.63 | 1237803 | 47739  | 72.302  |
|     |       | 1711996 | 68798  | 100.000 |

Peak rejection level: 1000

Fig S271. HPLC analysis of the mixture of chiral compound anti-3b obtained and the racemic compound anti-3b, for comparison (Table 3, entry 2).

**D-2000 Elite HPLC System Manager Report**Analyzed Date and Time: 2015/04/24  
12:38 下午Reported Date and Time: 2015/04/24  
12:55 下午Processed Date and Time: 2015/04/24  
12:55 下午

Data Path: D:\LCH\DATA\0145\

Processing Method: Ea/Hx

System (acquisition): Sys 1

Series: 0145

Application(data): LCH

Vial Number: 1

Sample Name: LCH-2-381-p1-rac

Vial Type: UNK

Injection from this vial: 1 of 1

Volume: 20.0 ul

Sample Description: 15%Ea/Hx-1ml/min-col IC

Chrom Type: Fixed WL Chromatogram, 300 nm

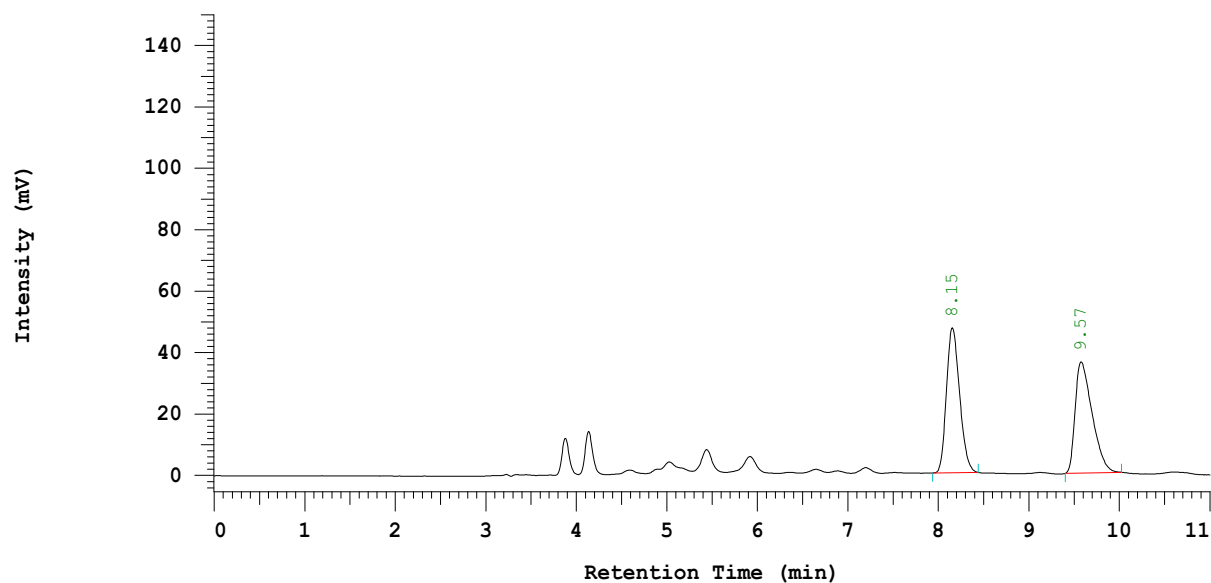

Processing Method: Ea/Hx

Column Type: IC

Method Developer: YVW

Method Description:

Chrom Type: Fixed WL Chromatogram, 300 nm

Peak Quantitation: AREA

Calculation Method: EXT-STD

Scale Factor 1: 1.000

| No. | RT   | Area   | Height | Area %  |
|-----|------|--------|--------|---------|
| 1   | 8.15 | 475814 | 47191  | 50.375  |
| 2   | 9.57 | 468739 | 36175  | 49.625  |
|     |      | 944553 | 83366  | 100.000 |

Peak rejection level: 1000

Fig S272. HPLC analysis of the racemic compound syn-3c,  
as a standard for comparison (Table 3, entry 3).

**D-2000 Elite HPLC System Manager Report**Analyzed Date and Time: 2015/04/24  
12:51 下午Reported Date and Time: 2015/05/14  
10:02 下午Processed Date and Time: 2015/05/14  
10:00 下午

Data Path: D:\LCH\DATA\0146\

Processing Method: Ea/Hx

System (acquisition): Sys 1

Series: 0146

Application(data): LCH

Vial Number: 2

Sample Name: LCH-2-381-p1-chi

Vial Type: UNK

Injection from this vial: 1 of 1

Volume: 20.0 ul

Sample Description: 15%Ea/Hx-1ml/min-col IC

Chrom Type: Fixed WL Chromatogram, 300 nm

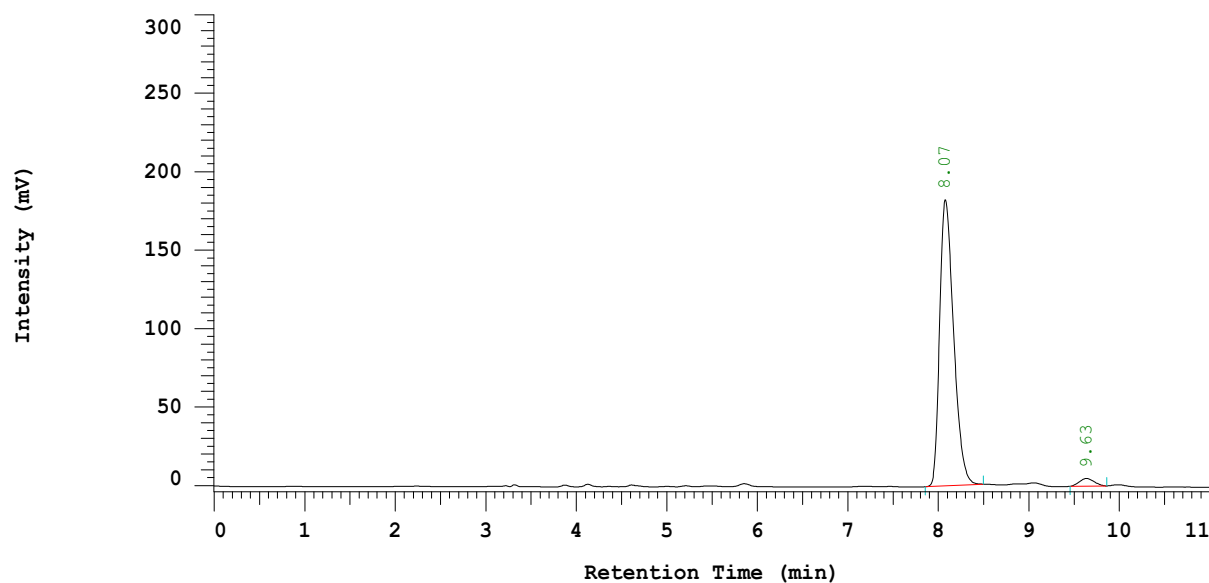

Processing Method: Ea/Hx

Column Type: IC

Method Developer: YVW

Method Description:

Chrom Type: Fixed WL Chromatogram, 300 nm

Peak Quantitation: AREA

Calculation Method: EXT-STD

Scale Factor 1: 1.000

| No. | RT   | Area    | Height | Area %  |
|-----|------|---------|--------|---------|
| 1   | 8.07 | 1943130 | 182237 | 97.360  |
| 2   | 9.63 | 52688   | 4777   | 2.640   |
|     |      | 1995818 | 187014 | 100.000 |

Peak rejection level: 1000

Fig S273. HPLC analysis of the chiral compound syn-3c obtained, (Table 3, entry 3).

**D-2000 Elite HPLC System Manager Report**Analyzed Date and Time: 2015/04/24  
01:06 下午Reported Date and Time: 2015/04/24  
01:21 下午Processed Date and Time: 2015/04/24  
01:20 下午

Data Path: D:\LCH\DATA\0147\

Processing Method: Ea/Hx

System (acquisition): Sys 1

Series: 0147

Application(data): LCH

Vial Number: 3

Sample Name: LCH-2-381-p1-co

Vial Type: UNK

Injection from this vial: 1 of 1

Volume: 20.0 ul

Sample Description: 15%Ea/Hx-1ml/min-col IC

Chrom Type: Fixed WL Chromatogram, 300 nm

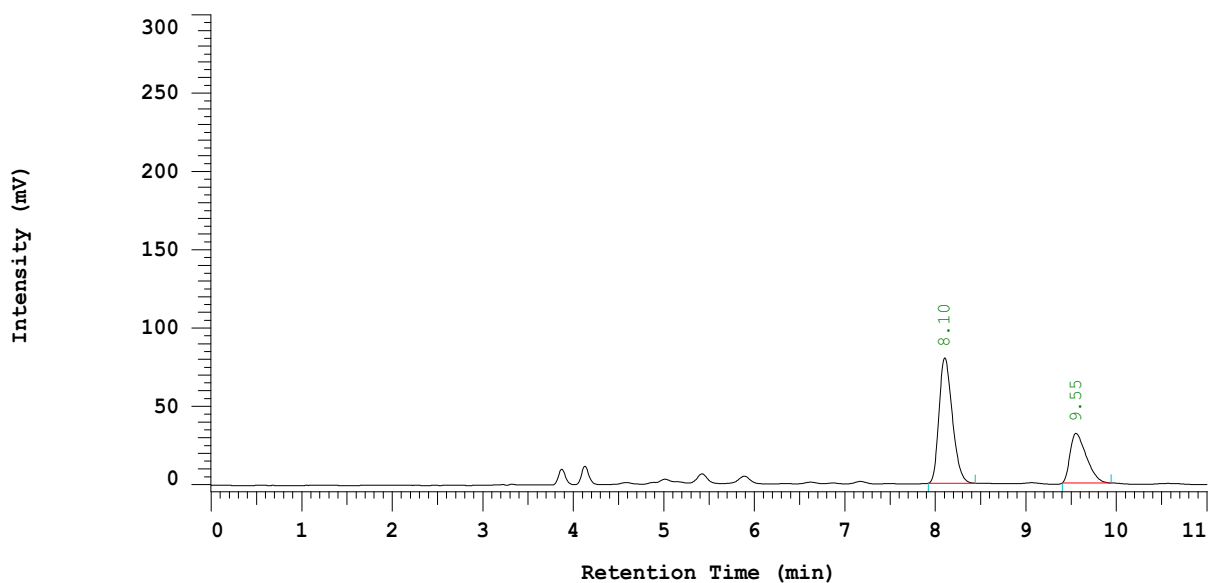

Processing Method: Ea/Hx

Column Type: IC

Method Developer: YVW

Method Description:

Chrom Type: Fixed WL Chromatogram, 300 nm

Peak Quantitation: AREA

Calculation Method: EXT-STD

Scale Factor 1: 1.000

| No. | RT   | Area    | Height | Area %  |
|-----|------|---------|--------|---------|
| 1   | 8.10 | 814219  | 80026  | 67.363  |
| 2   | 9.55 | 394492  | 31670  | 32.637  |
|     |      | 1208711 | 111696 | 100.000 |

Peak rejection level: 1000

Fig S274. HPLC analysis of the mixture of chiral compound syn-3c obtained and the racemic compound syn-3c, for comparison (Table 3, entry 3).

**D-2000 Elite HPLC System Manager Report**Analyzed Date and Time: 2015/04/24  
02:45 下午Reported Date and Time: 2015/04/24  
03:01 下午Processed Date and Time: 2015/04/24  
03:01 下午

Data Path: D:\LCH\DATA\0149\

Processing Method: Ea/Hx

System (acquisition): Sys 1

Series: 0149

Application(data): LCH

Vial Number: 1

Sample Name: LCH-2-381-p2-rac

Vial Type: UNK

Injection from this vial: 1 of 1

Volume: 20.0 ul

Sample Description: 15%Ea/Hx-1ml/min-col IC

Chrom Type: Fixed WL Chromatogram, 254 nm

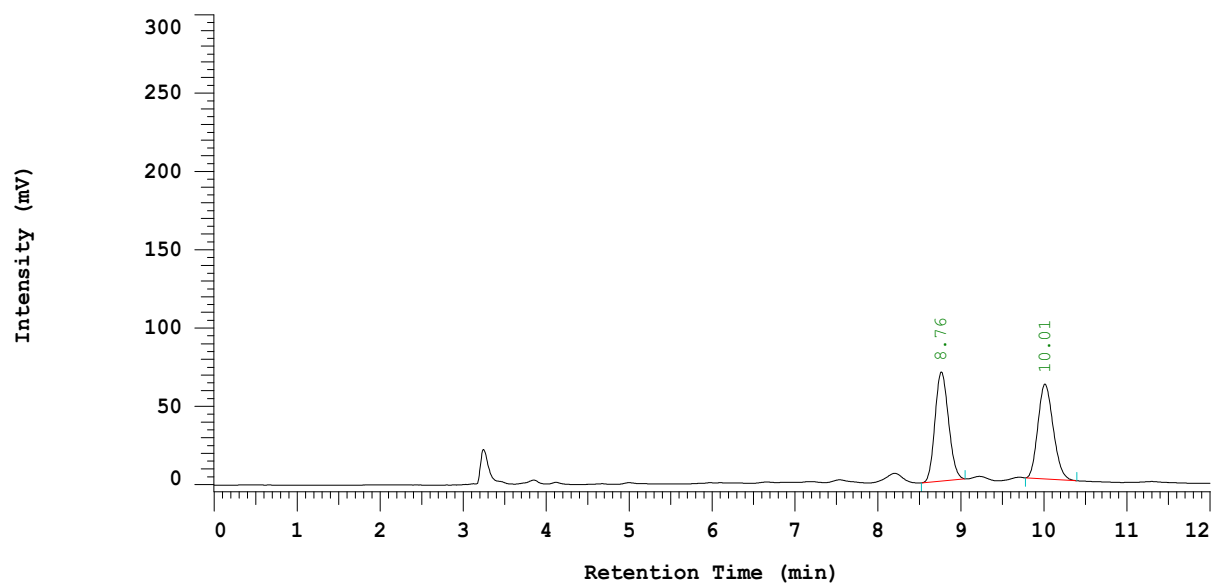

Processing Method: Ea/Hx

Column Type: IC

Method Developer: YVW

Method Description:

Chrom Type: Fixed WL Chromatogram, 254 nm

Peak Quantitation: AREA

Calculation Method: EXT-STD

Scale Factor 1: 1.000

| No. | RT    | Area    | Height | Area %  |
|-----|-------|---------|--------|---------|
| 1   | 8.76  | 789721  | 69654  | 50.269  |
| 2   | 10.01 | 781268  | 60538  | 49.731  |
|     |       | 1570989 | 130192 | 100.000 |

Peak rejection level: 1000

**Fig S275. HPLC analysis of the racemic compound anti-3c, as a standard for comparison (Table 3, entry 3).**

**D-2000 Elite HPLC System Manager Report**Analyzed Date and Time: 2015/04/24  
02:59 下午Reported Date and Time: 2015/05/14  
10:17 下午Processed Date and Time: 2015/05/14  
10:16 下午

Data Path: D:\LCH\DATA\0150\

Processing Method: Ea/Hx

System (acquisition): Sys 1

Series: 0150

Application(data): LCH

Vial Number: 2

Sample Name: LCH-2-381-p2-chi

Vial Type: UNK

Injection from this vial: 1 of 1

Volume: 20.0 ul

Sample Description: 15%Ea/Hx-1ml/min-col IC

Chrom Type: Fixed WL Chromatogram, 254 nm

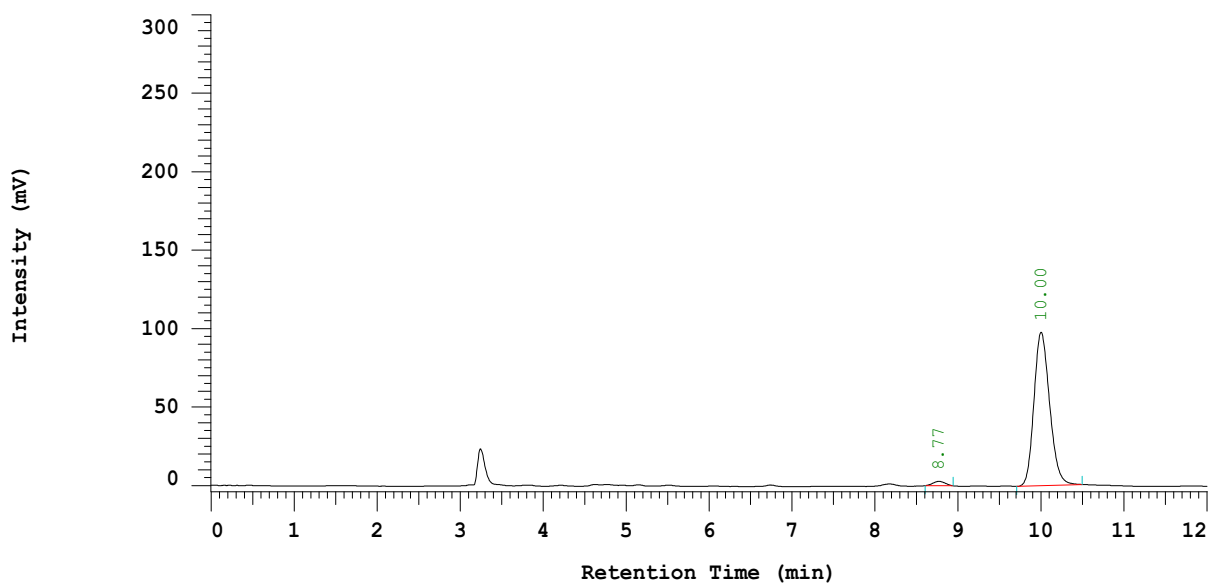

Processing Method: Ea/Hx

Column Type: IC

Method Developer: YVW

Method Description:

Chrom Type: Fixed WL Chromatogram, 254 nm

Peak Quantitation: AREA

Calculation Method: EXT-STD

Scale Factor 1: 1.000

| No. | RT    | Area    | Height | Area %  |
|-----|-------|---------|--------|---------|
| 1   | 8.77  | 26996   | 2671   | 2.055   |
| 2   | 10.00 | 1286640 | 97810  | 97.945  |
|     |       | 1313636 | 100481 | 100.000 |

Peak rejection level: 1000

Fig S276. HPLC analysis of the chiral compound anti-3c obtained, (Table 3, entry 3).



**D-2000 Elite HPLC System Manager Report**Analyzed Date and Time: 2015/04/24  
03:15 下午Reported Date and Time: 2015/04/24  
03:57 下午Processed Date and Time: 2015/04/24  
03:56 下午

Data Path: D:\LCH\DATA\0151\

Processing Method: Ea/Hx

System (acquisition): Sys 1

Series: 0151

Application(data): LCH

Vial Number: 3

Sample Name: LCH-2-381-p2-co

Vial Type: UNK

Injection from this vial: 1 of 1

Volume: 20.0 ul

Sample Description: 15%Ea/Hx-1ml/min-col IC

Chrom Type: Fixed WL Chromatogram, 254 nm

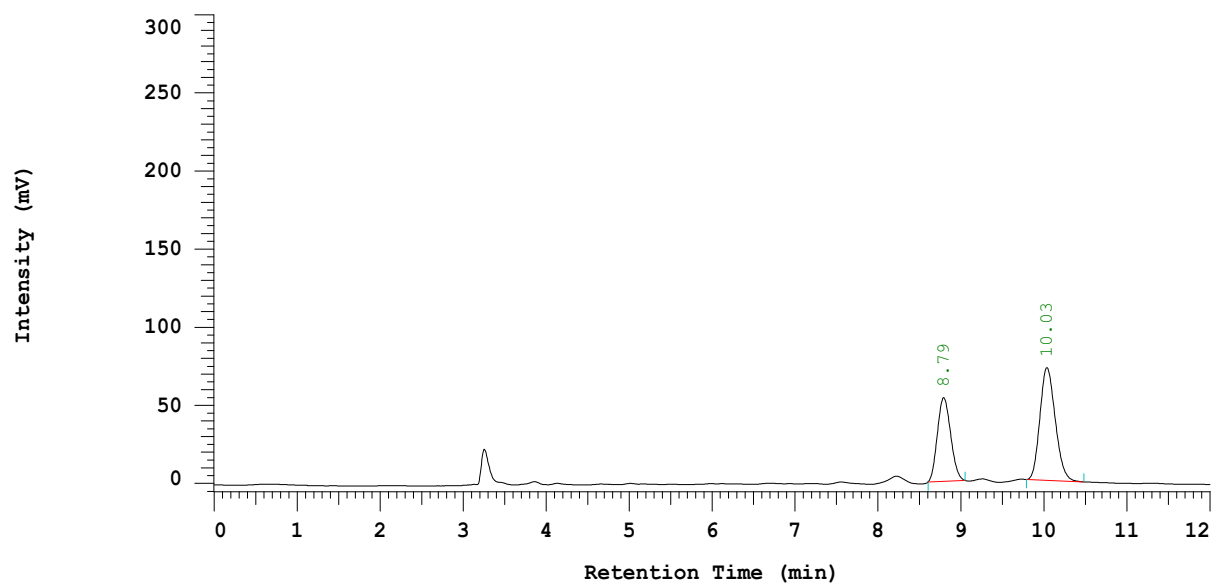

Processing Method: Ea/Hx

Column Type: IC

Method Developer: YVW

Method Description:

Chrom Type: Fixed WL Chromatogram, 254 nm

Peak Quantitation: AREA

Calculation Method: EXT-STD

Scale Factor 1: 1.000

| No. | RT    | Area    | Height | Area %  |
|-----|-------|---------|--------|---------|
| 1   | 8.79  | 596010  | 53615  | 38.921  |
| 2   | 10.03 | 935315  | 72186  | 61.079  |
|     |       | 1531325 | 125801 | 100.000 |

Peak rejection level: 1000

Fig S277. HPLC analysis of the mixture of chiral compound anti-3c obtained and the racemic compound anti-3c, for comparison (Table 3, entry 3).

**D-2000 Elite HPLC System Manager Report**

Analyzed Date and Time: 2015/01/20  
11:17 下午

Reported Date and Time: 2015/01/21  
12:36 上午

Processed Date and Time: 2015/01/21  
12:35 上午

Data Path: D:\LCH\DATA\0017\

Processing Method: test-Ea/Hx

System (acquisition): Sys 1

Series: 0017

Application(data): LCH

Vial Number: 1

Sample Name: LCH-2-364-p1-rac

Vial Type: UNK

Injection from this vial: 1 of 1

Volume: 20.0 ul

Sample Description: 10%Ea/Hx-1ml/min-col IC

Chrom Type: Fixed WL Chromatogram, 254 nm

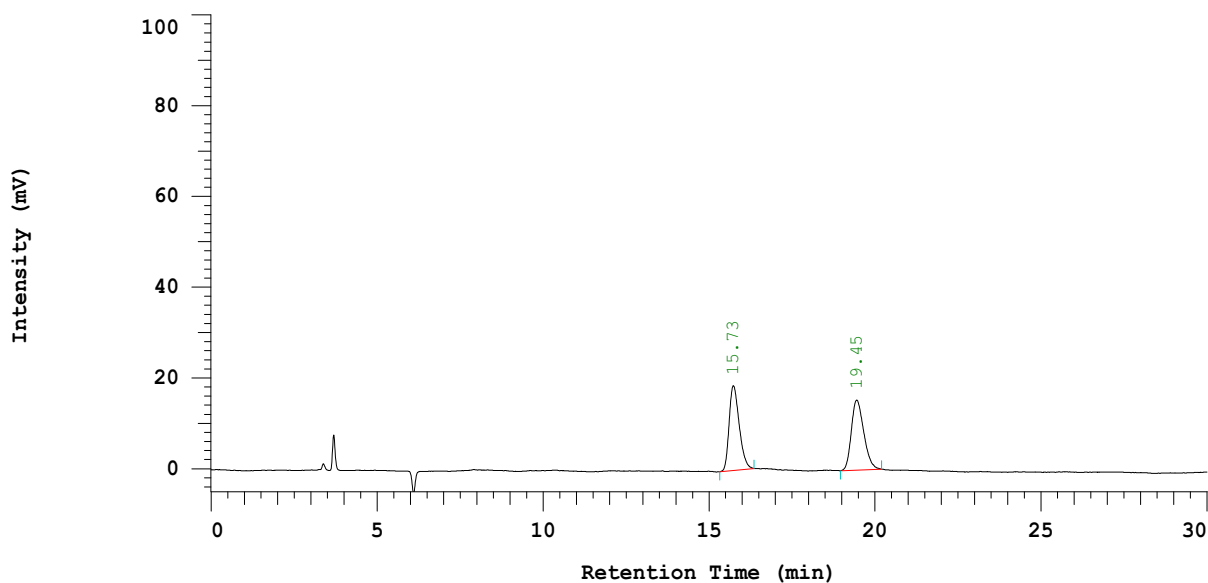

Processing Method: test-Ea/Hx

Column Type: IC

Method Developer: YVW

Method Description:

Chrom Type: Fixed WL Chromatogram, 254 nm

Peak Quantitation: AREA

Calculation Method: EXT-STD

Scale Factor 1: 1.000

| No. | RT    | Area   | Height | Area %  |
|-----|-------|--------|--------|---------|
| 1   | 15.73 | 390216 | 18660  | 49.534  |
| 2   | 19.45 | 397564 | 15420  | 50.466  |
|     |       | 787780 | 34080  | 100.000 |

Peak rejection level: 1000

**Fig S278. HPLC analysis of the racemic compound syn-3d, as a standard for comparison (Table 3, entry 4).**

**D-2000 Elite HPLC System Manager Report**Analyzed Date and Time: 2015/01/20  
11:48 下午Reported Date and Time: 2015/04/15  
09:30 下午Processed Date and Time: 2015/04/15  
09:29 下午

Data Path: D:\LCH\DATA\0018\

Processing Method: test-Ea/Hx

System (acquisition): Sys 1

Series: 0018

Application(data): LCH

Vial Number: 2

Sample Name: LCH-2-364-p1-chi

Vial Type: UNK

Injection from this vial: 1 of 1

Volume: 20.0 ul

Sample Description: 10%Ea/Hx-1ml/min-col IC

Chrom Type: Fixed WL Chromatogram, 254 nm

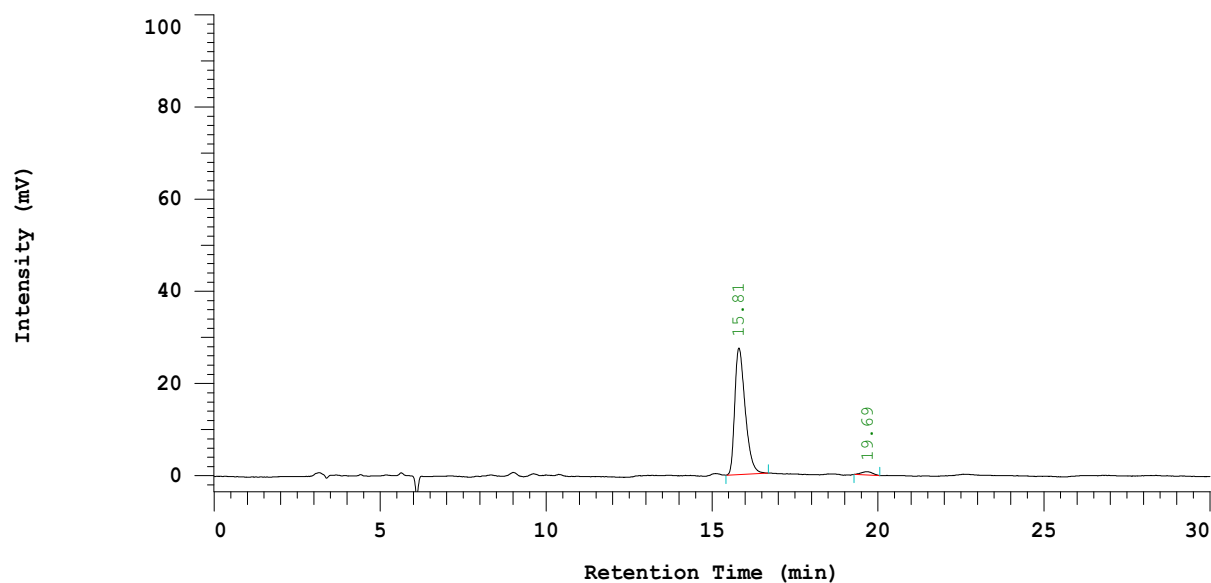

Processing Method: test-Ea/Hx

Column Type: IC

Method Developer: YVW

Method Description:

Chrom Type: Fixed WL Chromatogram, 254 nm

Peak Quantitation: AREA

Calculation Method: EXT-STD

Scale Factor 1: 1.000

| No. | RT    | Area   | Height | Area %  |
|-----|-------|--------|--------|---------|
| 1   | 15.81 | 593048 | 27455  | 97.136  |
| 2   | 19.69 | 17486  | 734    | 2.864   |
|     |       | 610534 | 28189  | 100.000 |

Peak rejection level: 10000

Fig S279. HPLC analysis of the chiral compound syn-3d obtained, (Table 3, entry 4).

**D-2000 Elite HPLC System Manager Report**Analyzed Date and Time: 2015/01/21  
01:43 下午Reported Date and Time: 2015/01/21  
02:23 下午Processed Date and Time: 2015/01/21  
02:23 下午

Data Path: D:\LCH\DATA\0020\

Processing Method: test-Ea/Hx

System (acquisition): Sys 1

Series: 0020

Application(data): LCH

Vial Number: 1

Sample Name: LCH-2-364-p1-co

Vial Type: UNK

Injection from this vial: 1 of 1

Volume: 20.0 ul

Sample Description: 10%Ea/Hx-1ml/min-col IC

Chrom Type: Fixed WL Chromatogram, 254 nm

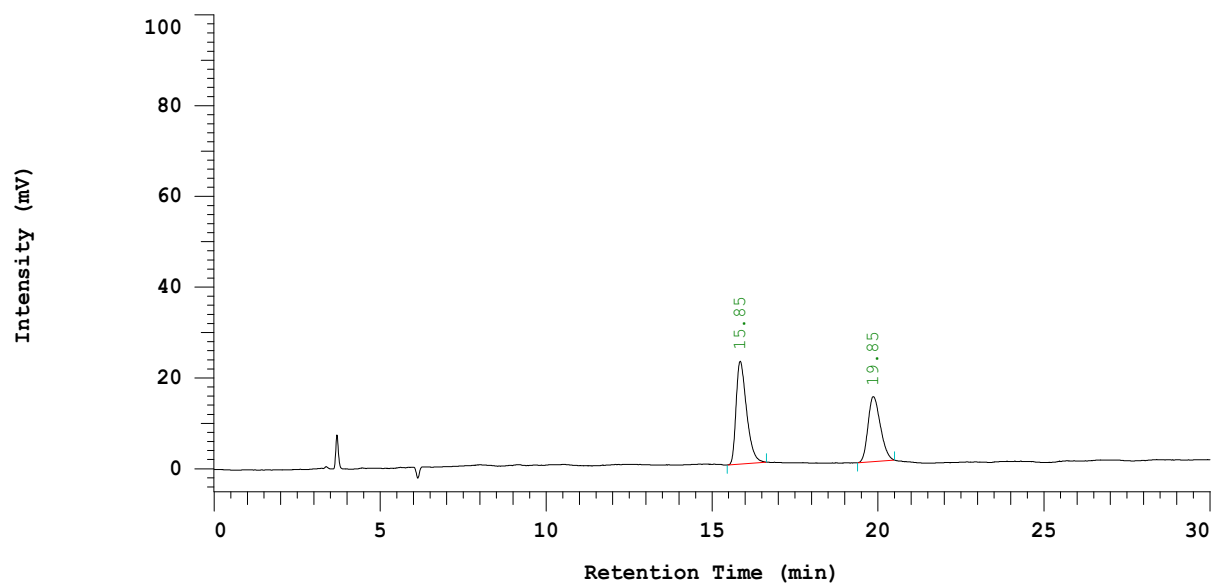

Processing Method: test-Ea/Hx

Column Type: IC

Method Developer: YVW

Method Description:

Chrom Type: Fixed WL Chromatogram, 254 nm

Peak Quantitation: AREA

Calculation Method: EXT-STD

Scale Factor 1: 1.000

| No. | RT    | Area   | Height | Area %  |
|-----|-------|--------|--------|---------|
| 1   | 15.85 | 491706 | 22616  | 57.011  |
| 2   | 19.85 | 370764 | 14324  | 42.989  |
|     |       | 862470 | 36940  | 100.000 |

Peak rejection level: 1000

**Fig S280. HPLC analysis of the mixture of chiral compound syn-3d obtained and the racemic compound syn-3d, for comparison (Table 3, entry 4).**

**D-2000 Elite HPLC System Manager Report**

Analyzed Date and Time: 2015/04/16  
03:50 下午

Reported Date and Time: 2015/04/16  
04:09 下午

Processed Date and Time: 2015/04/16  
04:09 下午

Data Path: D:\LCH\DATA\0125\

Processing Method: test-Ea/Hx

System (acquisition): Sys 1

Series: 0125

Application(data): LCH

Vial Number: 1

Sample Name: LCH-2-364-p2-rac

Vial Type: UNK

Injection from this vial: 1 of 1

Volume: 20.0 ul

Sample Description: 15%Ea/Hx-1ml/min-col IC

Chrom Type: Fixed WL Chromatogram, 254 nm

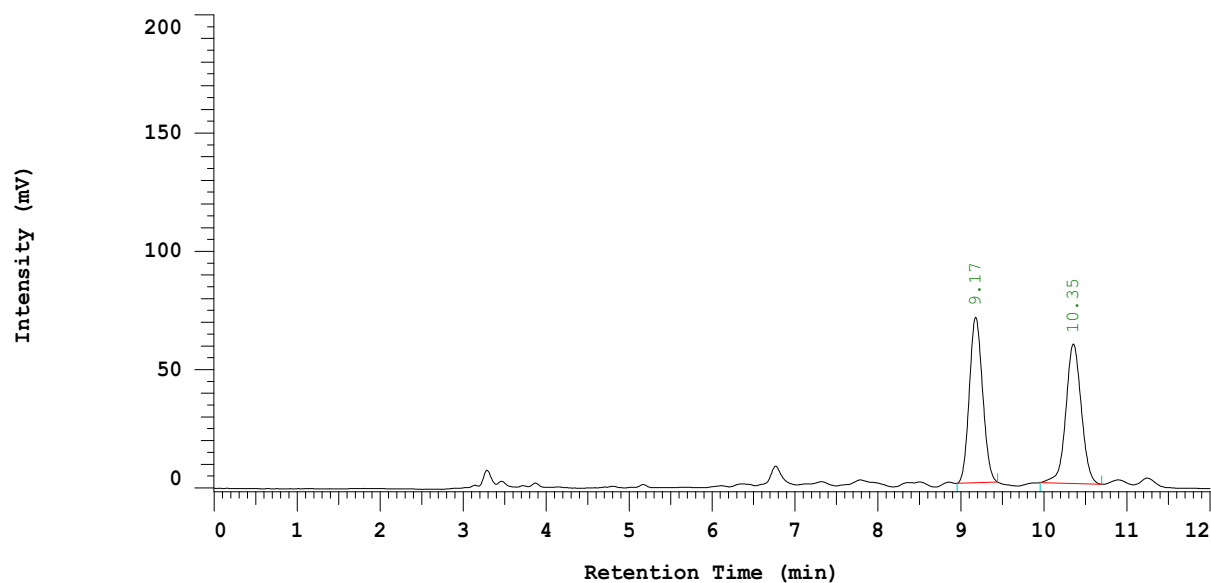

Processing Method: test-Ea/Hx

Column Type: IC

Method Developer: YVW

Method Description:

Chrom Type: Fixed WL Chromatogram, 254 nm

Peak Quantitation: AREA

Calculation Method: EXT-STD

Scale Factor 1: 1.000

| No. | RT    | Area    | Height | Area %  |
|-----|-------|---------|--------|---------|
| 1   | 9.17  | 772922  | 70025  | 50.353  |
| 2   | 10.35 | 762097  | 58991  | 49.647  |
|     |       | 1535019 | 129016 | 100.000 |

Peak rejection level: 20000

Fig S281. HPLC analysis of the racemic compound anti-3d,  
as a standard for comparison (Table 3, entry 4).

**D-2000 Elite HPLC System Manager Report**

Analyzed Date and Time: 2015/04/16  
04:22 下午

Reported Date and Time: 2015/04/16  
04:44 下午

Processed Date and Time: 2015/04/16  
04:43 下午

Data Path: D:\LCH\DATA\0127\

Processing Method: test-Ea/Hx

System (acquisition): Sys 1

Series: 0127

Application(data): LCH

Vial Number: 1

Sample Name: LCH-2-364-p2-chi

Vial Type: UNK

Injection from this vial: 1 of 1

Volume: 20.0 ul

Sample Description: 15%Ea/Hx-1ml/min-col IC

Chrom Type: Fixed WL Chromatogram, 254 nm

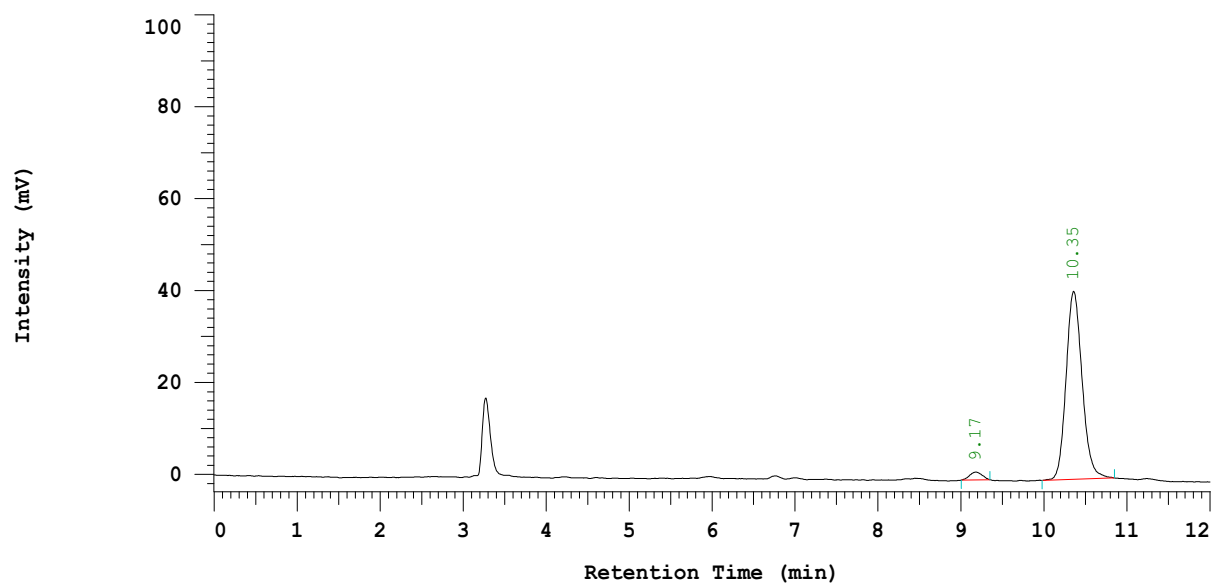

Processing Method: test-Ea/Hx

Column Type: IC

Method Developer: YVW

Method Description:

Chrom Type: Fixed WL Chromatogram, 254 nm

Peak Quantitation: AREA

Calculation Method: EXT-STD

Scale Factor 1: 1.000

| No. | RT    | Area   | Height | Area %  |
|-----|-------|--------|--------|---------|
| 1   | 9.17  | 18055  | 1738   | 3.189   |
| 2   | 10.35 | 548034 | 40901  | 96.811  |
|     |       | 566089 | 42639  | 100.000 |

Peak rejection level: 10000

Fig S282. HPLC analysis of the chiral compound anti-3d obtained, (Table 3, entry 4).

**D-2000 Elite HPLC System Manager Report**

Analyzed Date and Time: 2015/04/16  
04:38 下午

Reported Date and Time: 2015/04/16  
04:54 下午

Processed Date and Time: 2015/04/16  
04:54 下午

Data Path: D:\LCH\DATA\0128\

Processing Method: test-Ea/Hx

System (acquisition): Sys 1

Series: 0128

Application(data): LCH

Vial Number: 2

Sample Name: LCH-2-364-p2-co

Vial Type: UNK

Injection from this vial: 1 of 1

Volume: 20.0 ul

Sample Description: 15%Ea/Hx-1ml/min-col IC

Chrom Type: Fixed WL Chromatogram, 254 nm

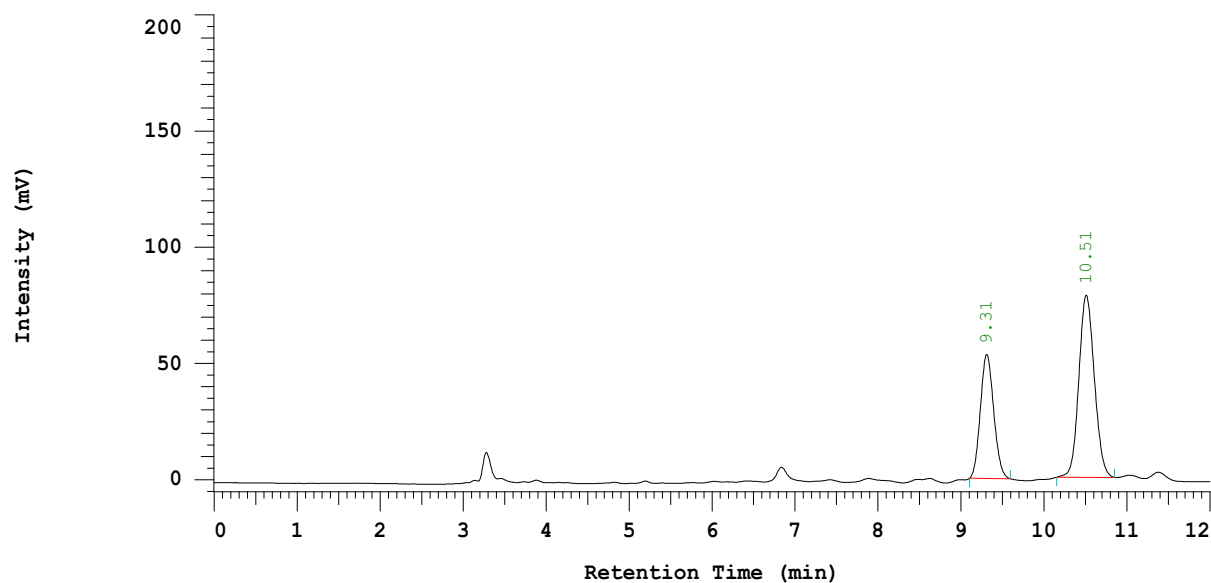

Processing Method: test-Ea/Hx

Column Type: IC

Method Developer: YVW

Method Description:

Chrom Type: Fixed WL Chromatogram, 254 nm

Peak Quantitation: AREA

Calculation Method: EXT-STD

Scale Factor 1: 1.000

| No. | RT    | Area    | Height | Area %  |
|-----|-------|---------|--------|---------|
| 1   | 9.31  | 601249  | 53299  | 37.178  |
| 2   | 10.51 | 1015947 | 78309  | 62.822  |
|     |       | 1617196 | 131608 | 100.000 |

Peak rejection level: 10000

**Fig S283. HPLC analysis of the mixture of chiral compound anti-3d obtained and the racemic compound anti-3d, for comparison (Table 3, entry 4).**

**D-2000 Elite HPLC System Manager Report**Analyzed Date and Time: 2015/04/27  
07:56 下午Reported Date and Time: 2015/04/27  
08:15 下午Processed Date and Time: 2015/04/27  
08:15 下午

Data Path: D:\LCH\DATA\0155\

Processing Method: Ea/Hx

System (acquisition): Sys 1

Series: 0155

Application(data): LCH

Vial Number: 1

Sample Name: LCH-2-382-p1-rac

Vial Type: UNK

Injection from this vial: 1 of 1

Volume: 20.0 ul

Sample Description: 15%Ea/Hx-1ml/min-col IC

Chrom Type: Fixed WL Chromatogram, 300 nm

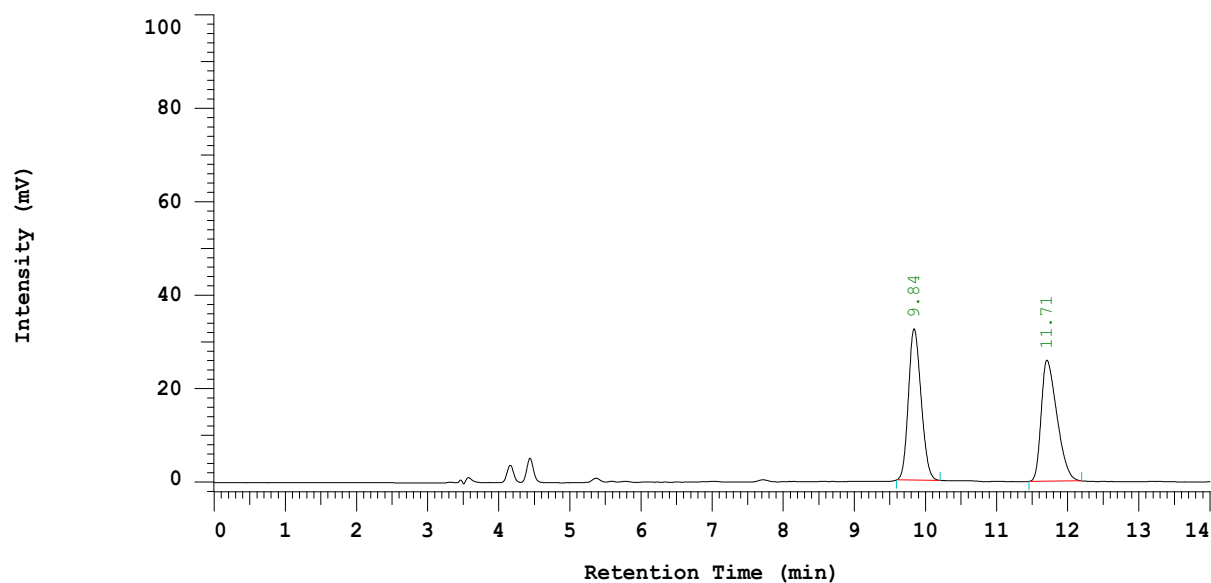

Processing Method: Ea/Hx

Column Type: IC

Method Developer: YVW

Method Description:

Chrom Type: Fixed WL Chromatogram, 300 nm

Peak Quantitation: AREA

Calculation Method: EXT-STD

Scale Factor 1: 1.000

| No. | RT    | Area   | Height | Area %  |
|-----|-------|--------|--------|---------|
| 1   | 9.84  | 400794 | 32380  | 50.000  |
| 2   | 11.71 | 400799 | 25885  | 50.000  |
|     |       | 801593 | 58265  | 100.000 |

Peak rejection level: 1000

Fig S284. HPLC analysis of the racemic compound syn-3e, as a standard for comparison (Table 3, entry 5).



**D-2000 Elite HPLC System Manager Report**Analyzed Date and Time: 2015/04/27  
08:12 下午Reported Date and Time: 2015/04/27  
08:34 下午Processed Date and Time: 2015/04/27  
08:33 下午

Data Path: D:\LCH\DATA\0156\

Processing Method: Ea/Hx

System (acquisition): Sys 1

Series: 0156

Application(data): LCH

Vial Number: 2

Sample Name: LCH-2-382-p1-chi

Vial Type: UNK

Injection from this vial: 1 of 1

Volume: 20.0 ul

Sample Description: 15%Ea/Hx-1ml/min-col IC

Chrom Type: Fixed WL Chromatogram, 300 nm

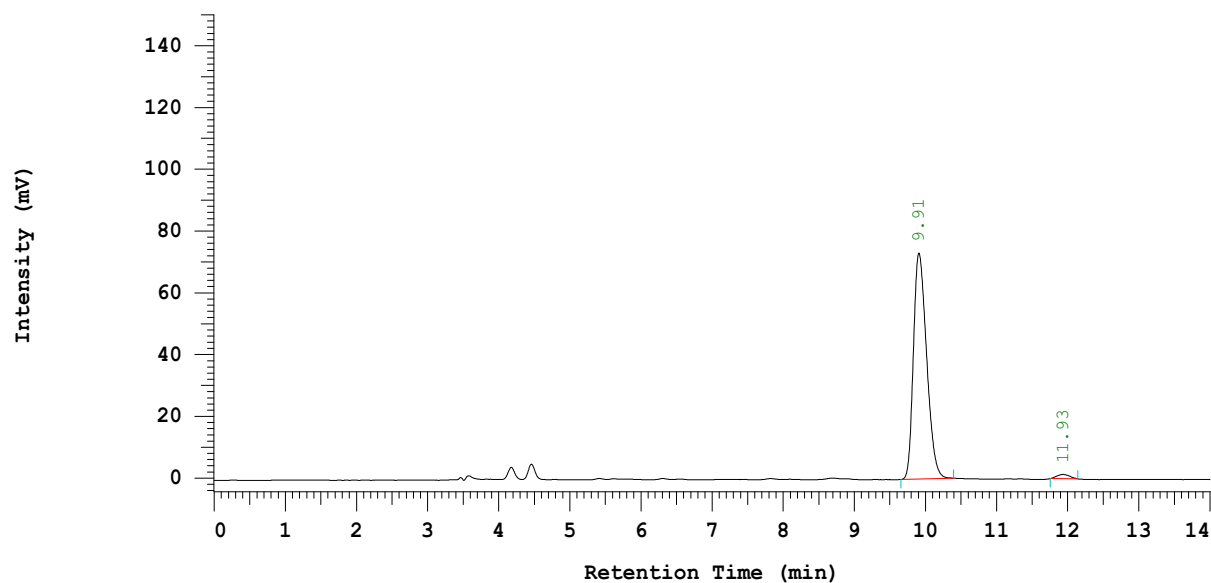

Processing Method: Ea/Hx

Column Type: IC

Method Developer: YVW

Method Description:

Chrom Type: Fixed WL Chromatogram, 300 nm

Peak Quantitation: AREA

Calculation Method: EXT-STD

Scale Factor 1: 1.000

| No. | RT    | Area   | Height | Area %  |
|-----|-------|--------|--------|---------|
| 1   | 9.91  | 939737 | 73189  | 98.168  |
| 2   | 11.93 | 17541  | 1400   | 1.832   |
|     |       | 957278 | 74589  | 100.000 |

Peak rejection level: 1000

Fig S285. HPLC analysis of the chiral compound syn-3e obtained, (Table 3, entry 5).

**D-2000 Elite HPLC System Manager Report**Analyzed Date and Time: 2015/04/27  
08:29 下午Reported Date and Time: 2015/04/27  
08:48 下午Processed Date and Time: 2015/04/27  
08:48 下午

Data Path: D:\LCH\DATA\0157\

Processing Method: Ea/Hx

System (acquisition): Sys 1

Series: 0157

Application(data): LCH

Vial Number: 3

Sample Name: LCH-2-382-p1-co

Vial Type: UNK

Injection from this vial: 1 of 1

Volume: 20.0 ul

Sample Description: 15%Ea/Hx-1ml/min-col IC

Chrom Type: Fixed WL Chromatogram, 300 nm

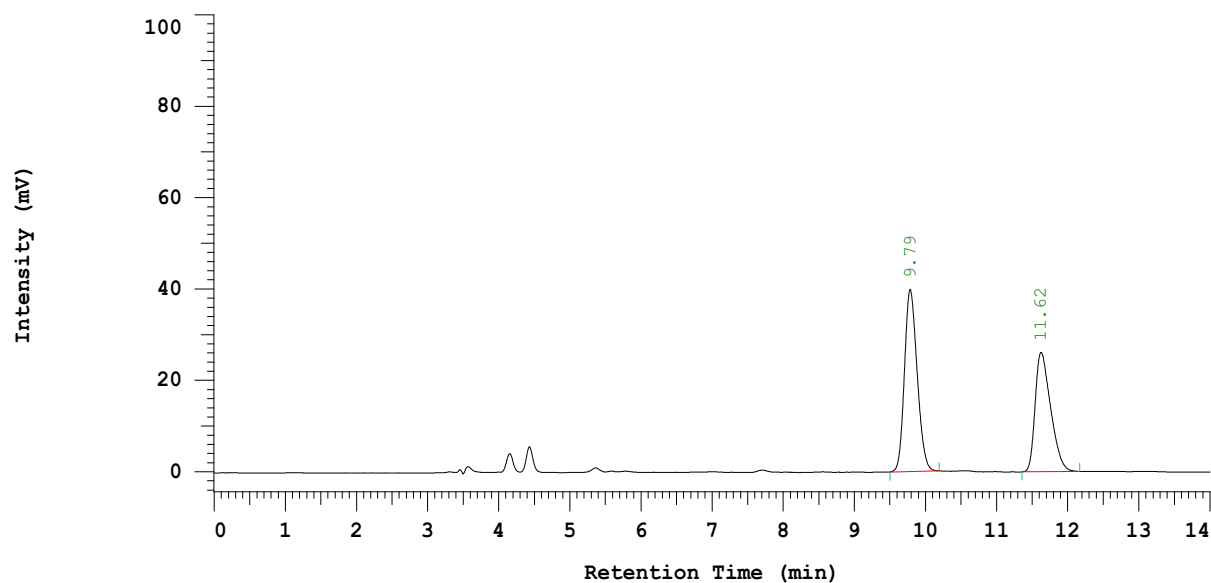

Processing Method: Ea/Hx

Column Type: IC

Method Developer: YVW

Method Description:

Chrom Type: Fixed WL Chromatogram, 300 nm

Peak Quantitation: AREA

Calculation Method: EXT-STD

Scale Factor 1: 1.000

| No. | RT    | Area   | Height | Area %  |
|-----|-------|--------|--------|---------|
| 1   | 9.79  | 493419 | 39842  | 55.418  |
| 2   | 11.62 | 396942 | 26126  | 44.582  |
|     |       | 890361 | 65968  | 100.000 |

Peak rejection level: 1000

Fig S286. HPLC analysis of the mixture of chiral compound syn-3e obtained and the racemic compound syn-3e, for comparison (Table 3, entry 5).

**D-2000 Elite HPLC System Manager Report**Analyzed Date and Time: 2015/04/27  
10:53 下午Reported Date and Time: 2015/04/27  
11:07 下午Processed Date and Time: 2015/04/27  
11:07 下午

Data Path: D:\LCH\DATA\0164\

Processing Method: Ea/Hx

System (acquisition): Sys 1

Series: 0164

Application(data): LCH

Vial Number: 1

Sample Name: LCH-2-382-p2-rac

Vial Type: UNK

Injection from this vial: 1 of 1

Volume: 20.0 ul

Sample Description: 20%Ea/Hx-1ml/min-col IC

Chrom Type: Fixed WL Chromatogram, 254 nm

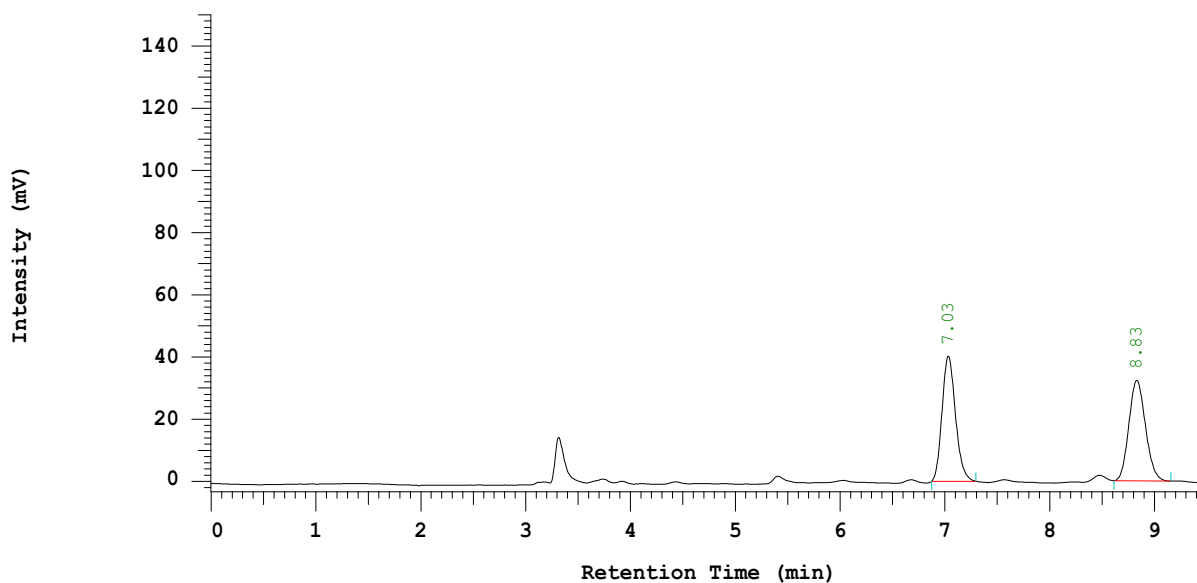

Processing Method: Ea/Hx

Column Type: IC

Method Developer: YVW

Method Description:

Chrom Type: Fixed WL Chromatogram, 254 nm

Peak Quantitation: AREA

Calculation Method: EXT-STD

Scale Factor 1: 1.000

| No. | RT   | Area   | Height | Area %  |
|-----|------|--------|--------|---------|
| 1   | 7.03 | 357929 | 40262  | 50.187  |
| 2   | 8.83 | 355262 | 32294  | 49.813  |
|     |      | 713191 | 72556  | 100.000 |

Peak rejection level: 1000

**Fig S287. HPLC analysis of the racemic compound anti-3e, as a standard for comparison (Table 3, entry 5).**

**D-2000 Elite HPLC System Manager Report**Analyzed Date and Time: 2015/04/27  
10:20 下午Reported Date and Time: 2015/04/27  
10:37 下午Processed Date and Time: 2015/04/27  
10:36 下午

Data Path: D:\LCH\DATA\0162\

Processing Method: Ea/Hx

System (acquisition): Sys 1

Series: 0162

Application(data): LCH

Vial Number: 2

Sample Name: LCH-2-382-p2-chi

Vial Type: UNK

Injection from this vial: 1 of 1

Volume: 20.0 ul

Sample Description: 20%Ea/Hx-1ml/min-col IC

Chrom Type: Fixed WL Chromatogram, 254 nm

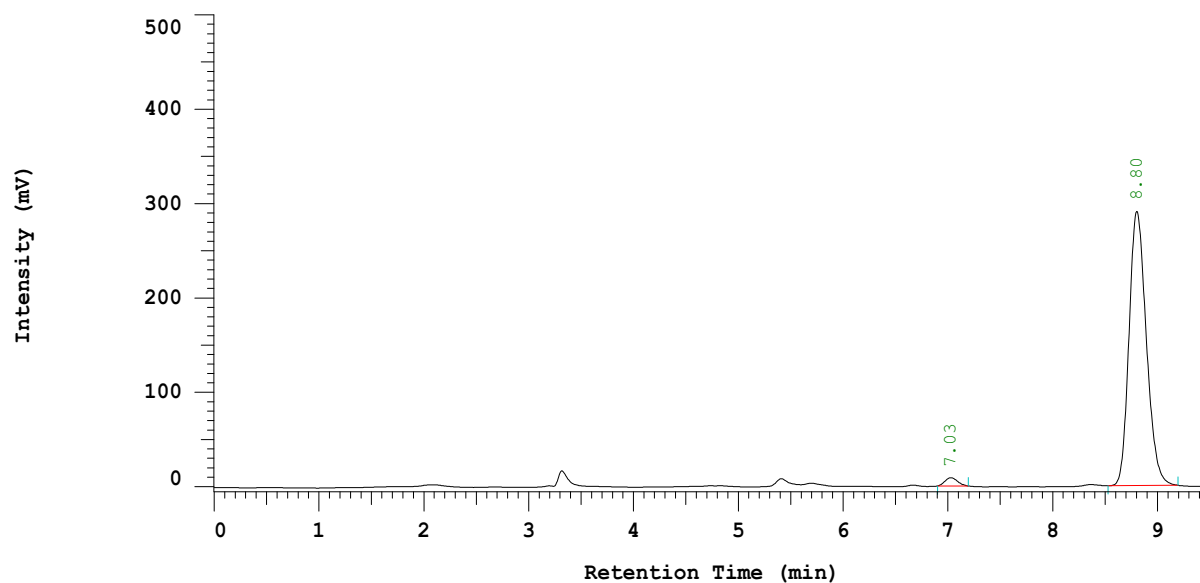

Processing Method: Ea/Hx

Column Type: IC

Method Developer: YVW

Method Description:

Chrom Type: Fixed WL Chromatogram, 254 nm

Peak Quantitation: AREA

Calculation Method: EXT-STD

Scale Factor 1: 1.000

| No. | RT   | Area    | Height | Area %  |
|-----|------|---------|--------|---------|
| 1   | 7.03 | 70715   | 8640   | 2.084   |
| 2   | 8.80 | 3322014 | 290282 | 97.916  |
|     |      | 3392729 | 298922 | 100.000 |

Peak rejection level: 1000

Fig S288. HPLC analysis of the chiral compound anti-3e obtained, (Table 3, entry 5).

**D-2000 Elite HPLC System Manager Report**Analyzed Date and Time: 2015/04/27  
10:33 下午Reported Date and Time: 2015/04/27  
10:48 下午Processed Date and Time: 2015/04/27  
10:48 下午

Data Path: D:\LCH\DATA\0163\

Processing Method: Ea/Hx

System (acquisition): Sys 1

Series: 0163

Application(data): LCH

Vial Number: 3

Sample Name: LCH-2-382-p2-co

Vial Type: UNK

Injection from this vial: 1 of 1

Volume: 20.0 ul

Sample Description: 20%Ea/Hx-1ml/min-col IC

Chrom Type: Fixed WL Chromatogram, 254 nm

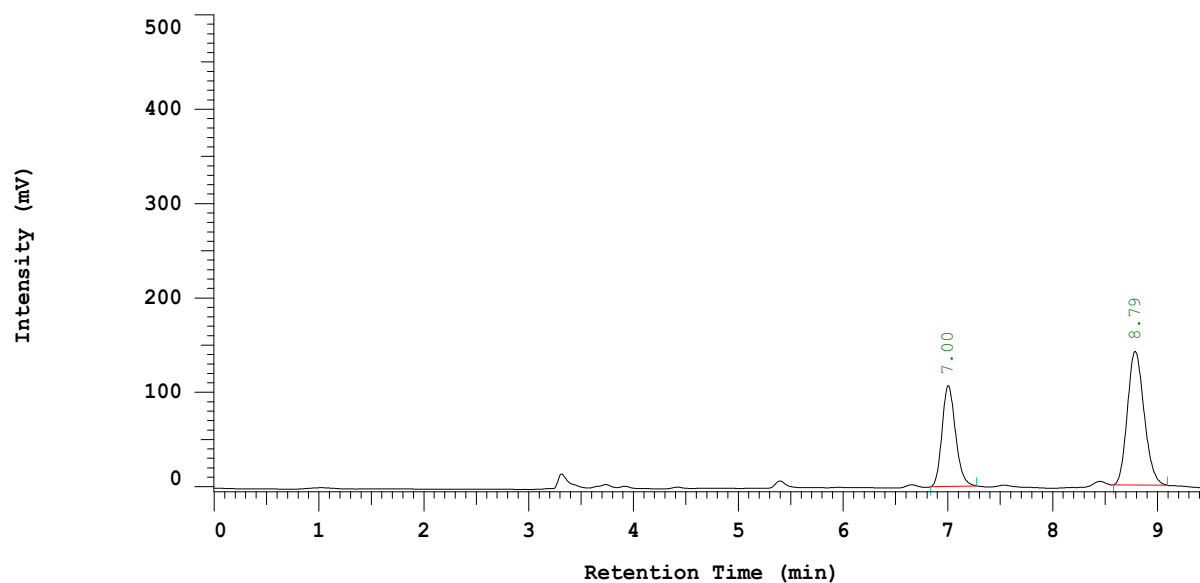

Processing Method: Ea/Hx

Column Type: IC

Method Developer: YVW

Method Description:

Chrom Type: Fixed WL Chromatogram, 254 nm

Peak Quantitation: AREA

Calculation Method: EXT-STD

Scale Factor 1: 1.000

| No. | RT   | Area    | Height | Area %  |
|-----|------|---------|--------|---------|
| 1   | 7.00 | 949789  | 106573 | 37.741  |
| 2   | 8.79 | 1566822 | 141665 | 62.259  |
|     |      | 2516611 | 248238 | 100.000 |

Peak rejection level: 1000

**Fig S289. HPLC analysis of the mixture of chiral compound anti-3e obtained and the racemic compound anti-3e, for comparison (Table 3, entry 5).**

**D-2000 Elite HPLC System Manager Report**Analyzed Date and Time: 2015/04/29  
01:53 下午Reported Date and Time: 2015/04/29  
02:12 下午Processed Date and Time: 2015/04/29  
02:12 下午

Data Path: D:\LCH\DATA\0165\

Processing Method: Ea/Hx

System (acquisition): Sys 1

Series: 0165

Application(data): LCH

Vial Number: 1

Sample Name: LCH-2-393-p1-rac

Vial Type: UNK

Injection from this vial: 1 of 1

Volume: 20.0 ul

Sample Description: 15%Ea/Hx-1ml/min-col IC

Chrom Type: Fixed WL Chromatogram, 300 nm

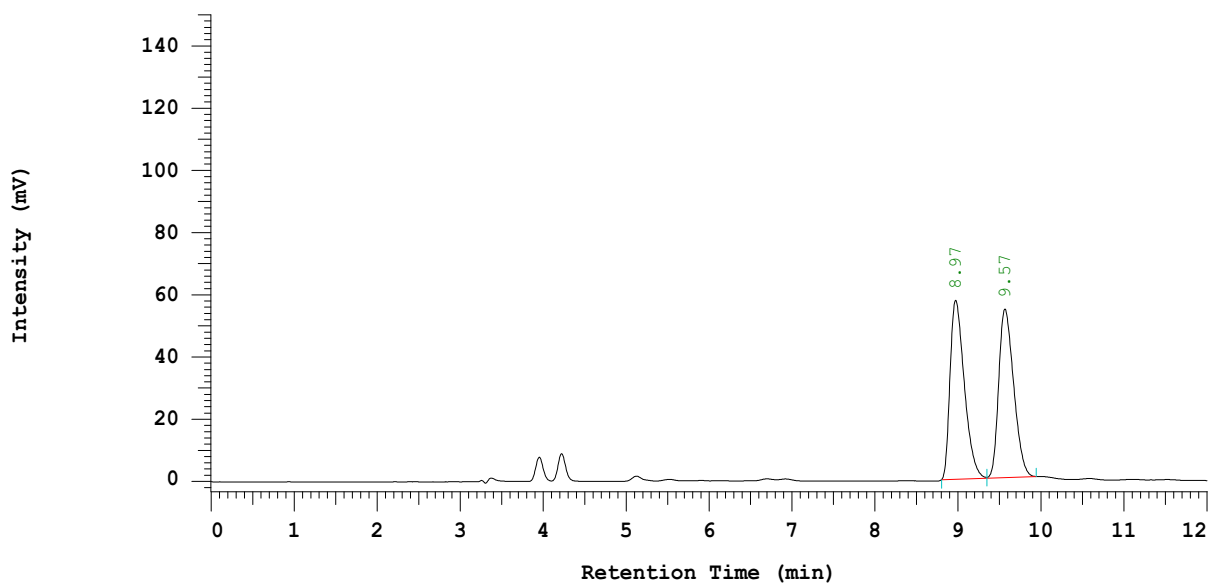

Processing Method: Ea/Hx

Column Type: IC

Method Developer: YVW

Method Description:

Chrom Type: Fixed WL Chromatogram, 300 nm

Peak Quantitation: AREA

Calculation Method: EXT-STD

Scale Factor 1: 1.000

| No. | RT   | Area    | Height | Area %  |
|-----|------|---------|--------|---------|
| 1   | 8.97 | 686258  | 57534  | 50.320  |
| 2   | 9.57 | 677535  | 54122  | 49.680  |
|     |      | 1363793 | 111656 | 100.000 |

Peak rejection level: 1000

**Fig S290. HPLC analysis of the racemic compound syn-3f, as a standard for comparison (Table 3, entry 6).**

**D-2000 Elite HPLC System Manager Report**Analyzed Date and Time: 2015/04/29  
02:14 下午Reported Date and Time: 2015/04/29  
02:42 下午Processed Date and Time: 2015/04/29  
02:41 下午

Data Path: D:\LCH\DATA\0166\

Processing Method: Ea/Hx

System (acquisition): Sys 1

Series: 0166

Application(data): LCH

Vial Number: 2

Sample Name: LCH-2-393-p1-chi

Vial Type: UNK

Injection from this vial: 1 of 1

Volume: 20.0 ul

Sample Description: 15%Ea/Hx-1ml/min-col IC

Chrom Type: Fixed WL Chromatogram, 300 nm

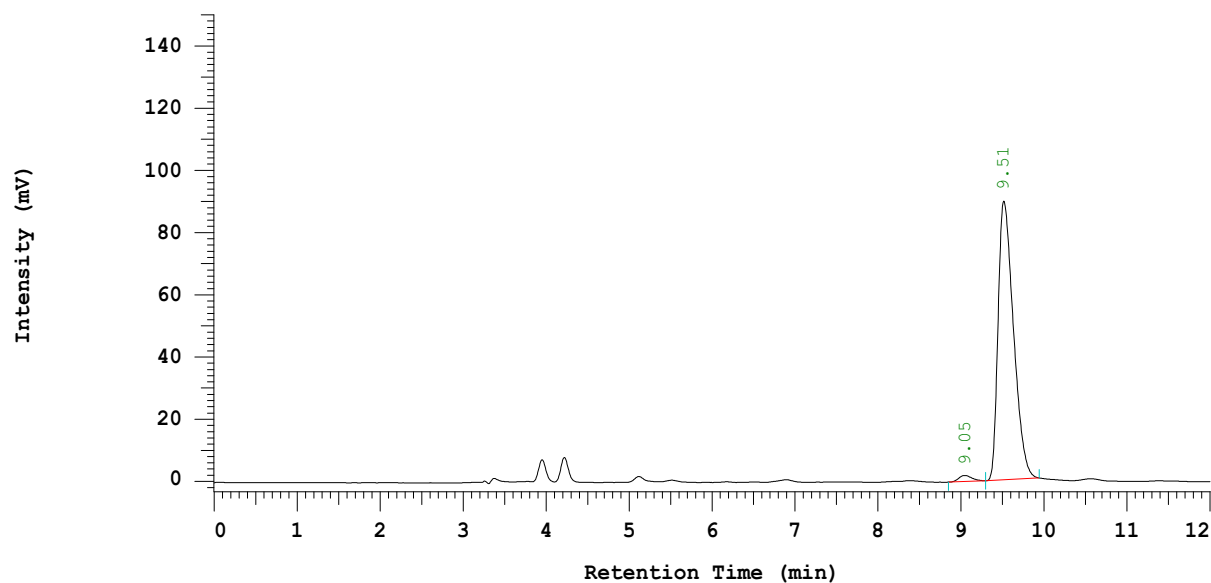

Processing Method: Ea/Hx

Column Type: IC

Method Developer: YVW

Method Description:

Chrom Type: Fixed WL Chromatogram, 300 nm

Peak Quantitation: AREA

Calculation Method: EXT-STD

Scale Factor 1: 1.000

| No. | RT   | Area    | Height | Area %  |
|-----|------|---------|--------|---------|
| 1   | 9.05 | 21871   | 1969   | 1.866   |
| 2   | 9.51 | 1150175 | 89553  | 98.134  |
|     |      | 1172046 | 91522  | 100.000 |

Peak rejection level: 1000

Fig S291. HPLC analysis of the chiral compound syn-3f obtained, (Table 3, entry 6).

**D-2000 Elite HPLC System Manager Report**Analyzed Date and Time: 2015/04/29  
02:30 下午Reported Date and Time: 2015/04/29  
02:44 下午Processed Date and Time: 2015/04/29  
02:44 下午

Data Path: D:\LCH\DATA\0167\

Processing Method: Ea/Hx

System (acquisition): Sys 1

Series: 0167

Application(data): LCH

Vial Number: 3

Sample Name: LCH-2-393-p1-co

Vial Type: UNK

Injection from this vial: 1 of 1

Volume: 20.0 ul

Sample Description: 15%Ea/Hx-1ml/min-col IC

Chrom Type: Fixed WL Chromatogram, 300 nm

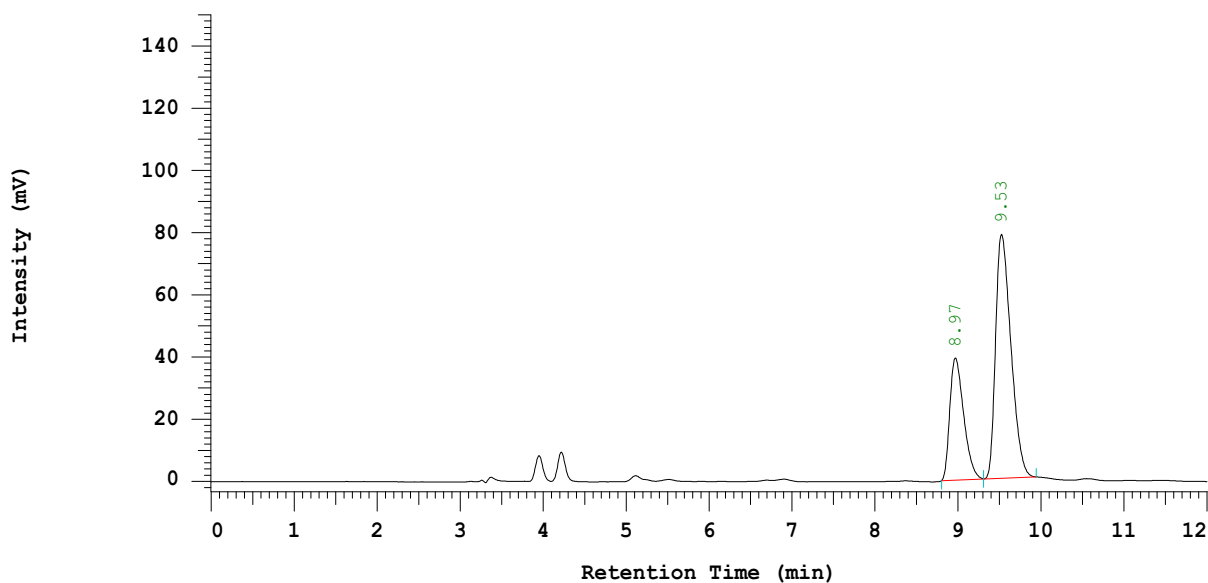

Processing Method: Ea/Hx

Column Type: IC

Method Developer: YVW

Method Description:

Chrom Type: Fixed WL Chromatogram, 300 nm

Peak Quantitation: AREA

Calculation Method: EXT-STD

Scale Factor 1: 1.000

| No. | RT   | Area    | Height | Area %  |
|-----|------|---------|--------|---------|
| 1   | 8.97 | 454229  | 39255  | 31.175  |
| 2   | 9.53 | 1002788 | 78340  | 68.825  |
|     |      | 1457017 | 117595 | 100.000 |

Peak rejection level: 1000

Fig S292. HPLC analysis of the mixture of chiral compound syn-3f obtained and the racemic compound syn-3f, for comparison (Table 3, entry 6).



**D-2000 Elite HPLC System Manager Report**Analyzed Date and Time: 2015/04/29  
03:34 下午Reported Date and Time: 2015/04/29  
04:08 下午Processed Date and Time: 2015/04/29  
04:08 下午

Data Path: D:\LCH\DATA\0169\

Processing Method: Ea/Hx

System (acquisition): Sys 1

Series: 0169

Application(data): LCH

Vial Number: 1

Sample Name: LCH-2-393-p2-rac

Vial Type: UNK

Injection from this vial: 1 of 1

Volume: 20.0 ul

Sample Description: 15%Ea/Hx-1ml/min-col IC

Chrom Type: Fixed WL Chromatogram, 300 nm

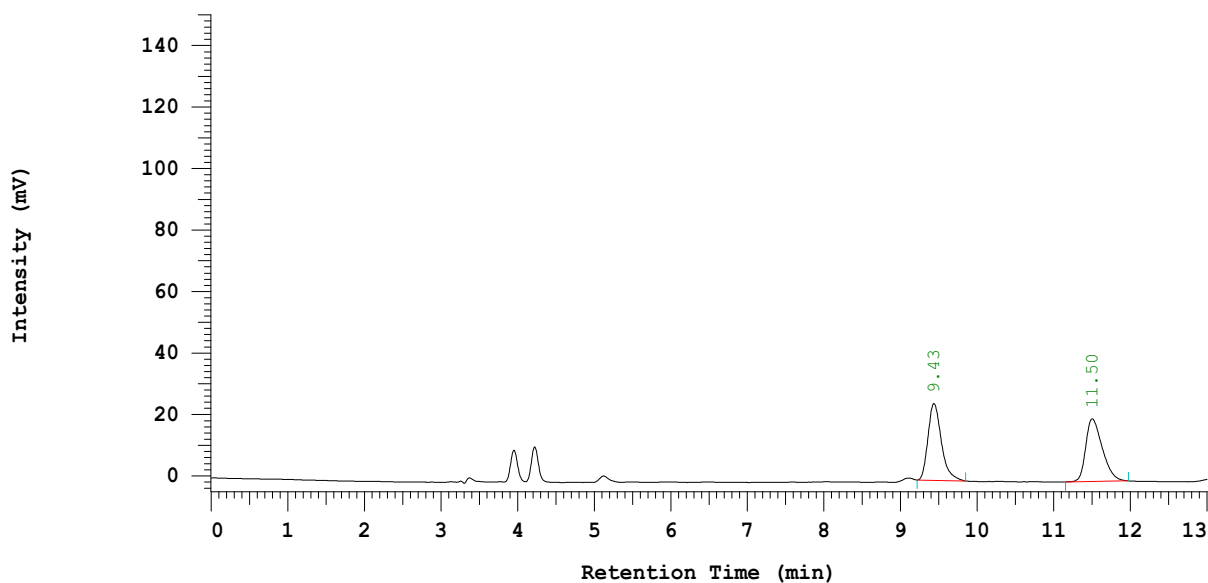

Processing Method: Ea/Hx

Column Type: IC

Method Developer: YVW

Method Description:

Chrom Type: Fixed WL Chromatogram, 300 nm

Peak Quantitation: AREA

Calculation Method: EXT-STD

Scale Factor 1: 1.000

| No. | RT    | Area   | Height | Area %  |
|-----|-------|--------|--------|---------|
| 1   | 9.43  | 306604 | 24970  | 49.909  |
| 2   | 11.50 | 307724 | 20392  | 50.091  |
|     |       | 614328 | 45362  | 100.000 |

Peak rejection level: 1000

Fig S293. HPLC analysis of the racemic compound anti-3f, as a standard for comparison (Table 3, entry 6).

**D-2000 Elite HPLC System Manager Report**Analyzed Date and Time: 2015/04/29  
04:32 下午Reported Date and Time: 2015/04/29  
04:50 下午Processed Date and Time: 2015/04/29  
04:50 下午

Data Path: D:\LCH\DATA\0172\

Processing Method: Ea/Hx

System (acquisition): Sys 1

Series: 0172

Application(data): LCH

Vial Number: 1

Sample Name: LCH-2-393-p2-chi

Vial Type: UNK

Injection from this vial: 1 of 1

Volume: 20.0 ul

Sample Description: 15%Ea/Hx-1ml/min-col IC

Chrom Type: Fixed WL Chromatogram, 300 nm

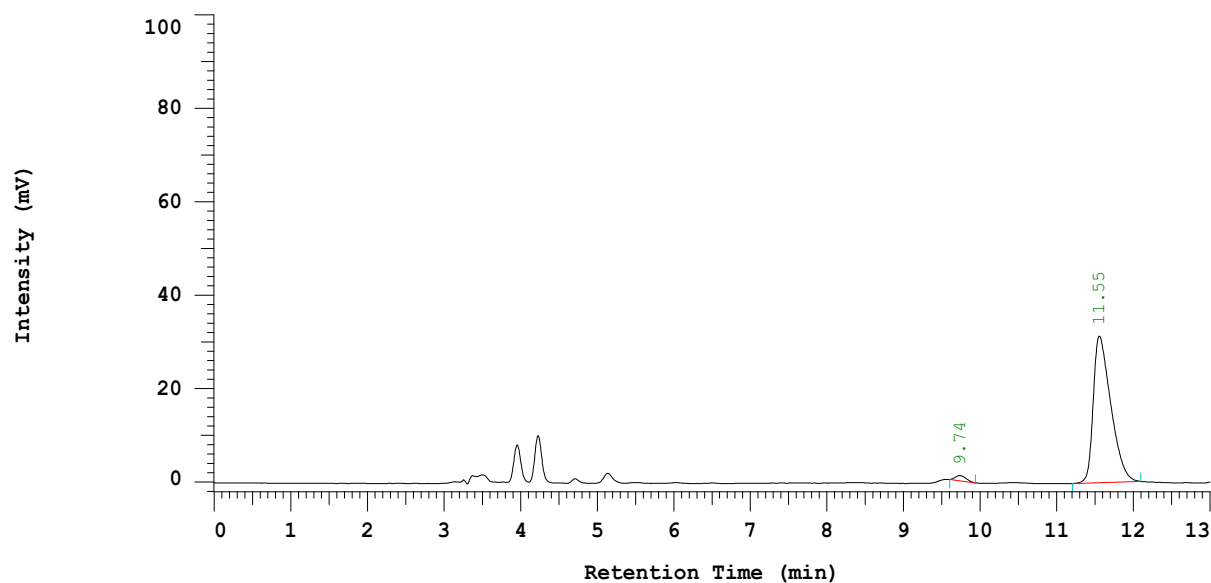

Processing Method: Ea/Hx

Column Type: IC

Method Developer: YVW

Method Description:

Chrom Type: Fixed WL Chromatogram, 300 nm

Peak Quantitation: AREA

Calculation Method: EXT-STD

Scale Factor 1: 1.000

| No. | RT    | Area   | Height | Area %  |
|-----|-------|--------|--------|---------|
| 1   | 9.74  | 11237  | 1135   | 2.187   |
| 2   | 11.55 | 502688 | 31402  | 97.813  |
|     |       | 513925 | 32537  | 100.000 |

Peak rejection level: 1000

Fig S294. HPLC analysis of the chiral compound anti-3f obtained, (Table 3, entry 6).

**D-2000 Elite HPLC System Manager Report**Analyzed Date and Time: 2015/04/29  
04:07 下午Reported Date and Time: 2015/04/29  
04:21 下午Processed Date and Time: 2015/04/29  
04:21 下午

Data Path: D:\LCH\DATA\0171\

Processing Method: Ea/Hx

System (acquisition): Sys 1

Series: 0171

Application(data): LCH

Vial Number: 3

Sample Name: LCH-2-393-p2-co

Vial Type: UNK

Injection from this vial: 1 of 1

Volume: 20.0 ul

Sample Description: 15%Ea/Hx-1ml/min-col IC

Chrom Type: Fixed WL Chromatogram, 300 nm

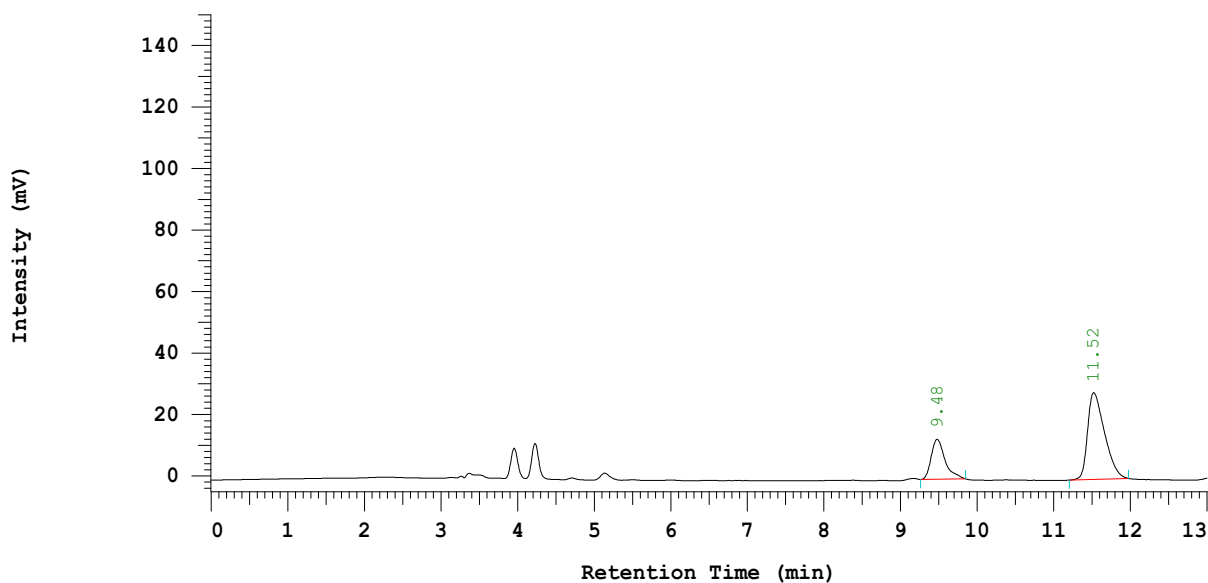

Processing Method: Ea/Hx

Column Type: IC

Method Developer: YVW

Method Description:

Chrom Type: Fixed WL Chromatogram, 300 nm

Peak Quantitation: AREA

Calculation Method: EXT-STD

Scale Factor 1: 1.000

| No. | RT    | Area   | Height | Area %  |
|-----|-------|--------|--------|---------|
| 1   | 9.48  | 163712 | 13011  | 27.269  |
| 2   | 11.52 | 436646 | 28238  | 72.731  |
|     |       | 600358 | 41249  | 100.000 |

Peak rejection level: 1000

**Fig S295. HPLC analysis of the mixture of chiral compound anti-3f obtained and the racemic compound anti-3f, for comparison (Table 3, entry 6).**

**D-2000 Elite HPLC System Manager Report**Analyzed Date and Time: 2015/05/04  
04:01 下午Reported Date and Time: 2015/05/04  
04:46 下午Processed Date and Time: 2015/05/04  
04:46 下午

Data Path: D:\LCH\DATA\0205\

Processing Method: Ea/Hx

System (acquisition): Sys 1

Series: 0205

Application(data): LCH

Vial Number: 1

Sample Name: LCH-2-373-p1-rac

Vial Type: UNK

Injection from this vial: 1 of 1

Volume: 20.0 ul

Sample Description: 15%Ea/Hx-1ml/min-col IC

Chrom Type: Fixed WL Chromatogram, 280 nm

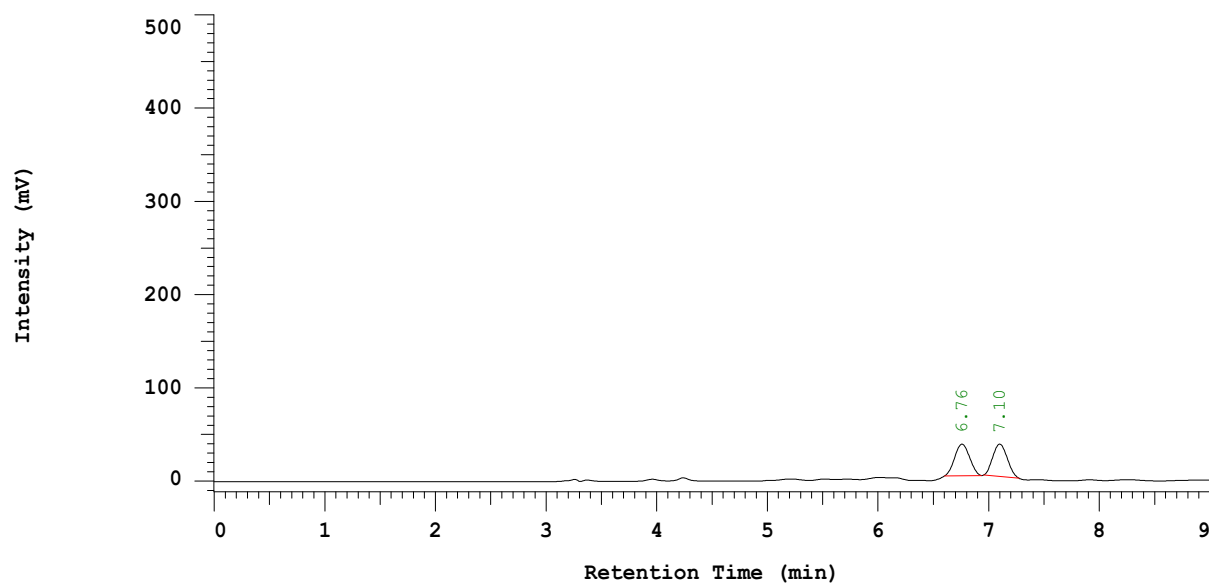

Processing Method: Ea/Hx

Column Type: IC

Method Developer: YVW

Method Description:

Chrom Type: Fixed WL Chromatogram, 280 nm

Peak Quantitation: AREA

Calculation Method: EXT-STD

Scale Factor 1: 1.000

| No. | RT   | Area   | Height | Area %  |
|-----|------|--------|--------|---------|
| 1   | 6.76 | 317541 | 33910  | 49.810  |
| 2   | 7.10 | 319961 | 34930  | 50.190  |
|     |      | 637502 | 68840  | 100.000 |

Peak rejection level: 1000

**Fig S296. HPLC analysis of the racemic compound syn-3g, as a standard for comparison (Table 3, entry 7).**

**D-2000 Elite HPLC System Manager Report**Analyzed Date and Time: 2015/05/04  
04:12 下午Reported Date and Time: 2015/05/04  
05:38 下午Processed Date and Time: 2015/05/04  
05:37 下午

Data Path: D:\LCH\DATA\0206\

Processing Method: Ea/Hx

System (acquisition): Sys 1

Series: 0206

Application(data): LCH

Vial Number: 2

Sample Name: LCH-2-373-p1-chi

Vial Type: UNK

Injection from this vial: 1 of 1

Volume: 20.0 ul

Sample Description: 15%Ea/Hx-1ml/min-col IC

Chrom Type: Fixed WL Chromatogram, 280 nm

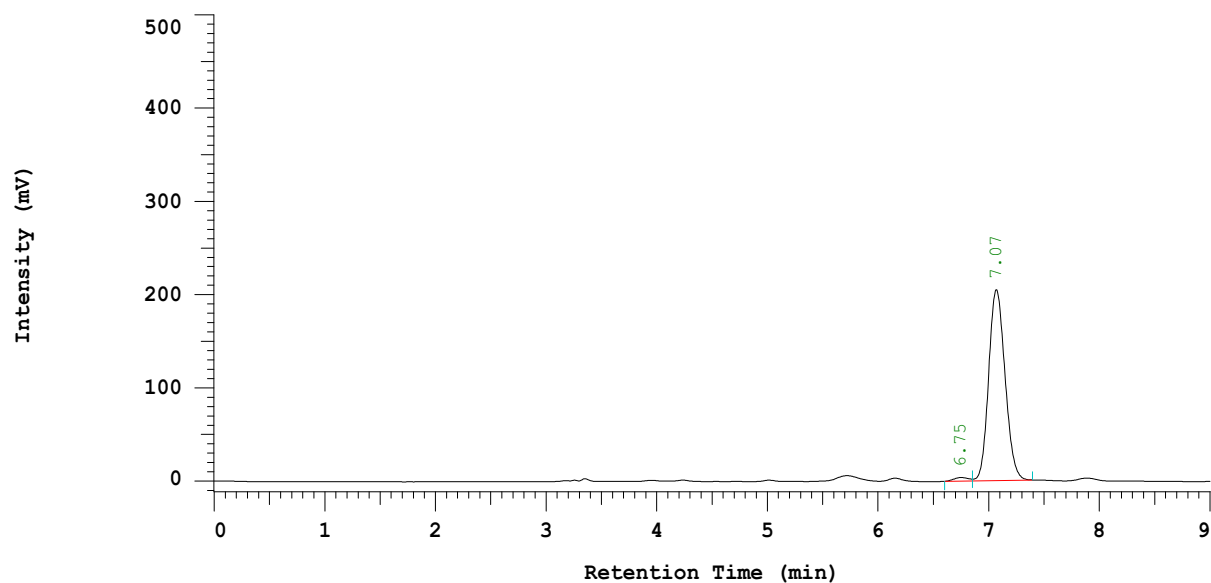

Processing Method: Ea/Hx

Column Type: IC

Method Developer: YVW

Method Description:

Chrom Type: Fixed WL Chromatogram, 280 nm

Peak Quantitation: AREA

Calculation Method: EXT-STD

Scale Factor 1: 1.000

| No. | RT   | Area    | Height | Area %  |
|-----|------|---------|--------|---------|
| 1   | 6.75 | 34523   | 3738   | 1.610   |
| 2   | 7.07 | 2109226 | 204574 | 98.390  |
|     |      | 2143749 | 208312 | 100.000 |

Peak rejection level: 1000

Fig S297. HPLC analysis of the chiral compound syn-3g obtained, (Table 3, entry 7).

**D-2000 Elite HPLC System Manager Report**Analyzed Date and Time: 2015/05/04  
04:32 下午Reported Date and Time: 2015/05/04  
04:50 下午Processed Date and Time: 2015/05/04  
04:50 下午

Data Path: D:\LCH\DATA\0207\

Processing Method: Ea/Hx

System (acquisition): Sys 1

Series: 0207

Application(data): LCH

Vial Number: 3

Sample Name: LCH-2-373-p1-co

Vial Type: UNK

Injection from this vial: 1 of 1

Volume: 20.0 ul

Sample Description: 15%Ea/Hx-1ml/min-col IC

Chrom Type: Fixed WL Chromatogram, 280 nm

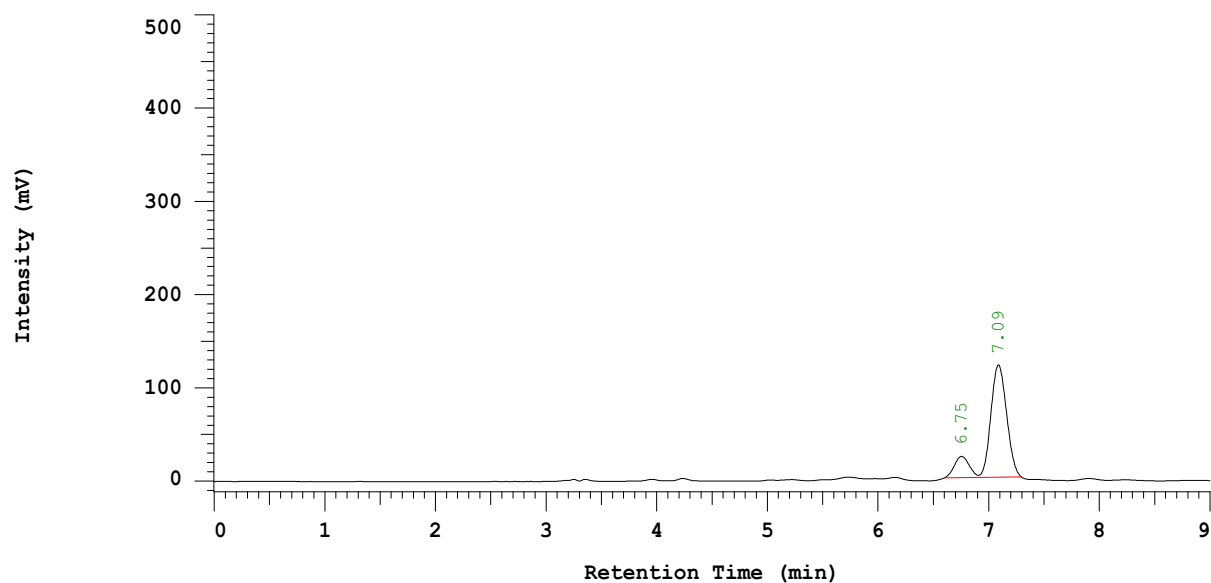

Processing Method: Ea/Hx

Column Type: IC

Method Developer: YVW

Method Description:

Chrom Type: Fixed WL Chromatogram, 280 nm

Peak Quantitation: AREA

Calculation Method: EXT-STD

Scale Factor 1: 1.000

| No. | RT   | Area    | Height | Area %  |
|-----|------|---------|--------|---------|
| 1   | 6.75 | 211715  | 22681  | 15.140  |
| 2   | 7.09 | 1186680 | 120487 | 84.860  |
|     |      | 1398395 | 143168 | 100.000 |

Peak rejection level: 1000

Fig S298. HPLC analysis of the mixture of chiral compound syn-3g obtained and the racemic compound syn-3g, for comparison (Table 3, entry 7).

**D-2000 Elite HPLC System Manager Report**Analyzed Date and Time: 2015/05/04  
04:55 下午Reported Date and Time: 2015/05/04  
05:16 下午Processed Date and Time: 2015/05/04  
05:16 下午

Data Path: D:\LCH\DATA\0208\

Processing Method: Ea/Hx

System (acquisition): Sys 1

Series: 0208

Application(data): LCH

Vial Number: 1

Sample Name: LCH-2-373-p2-rac

Vial Type: UNK

Injection from this vial: 1 of 1

Volume: 20.0 ul

Sample Description: 15%Ea/Hx-1ml/min-col IC

Chrom Type: Fixed WL Chromatogram, 280 nm

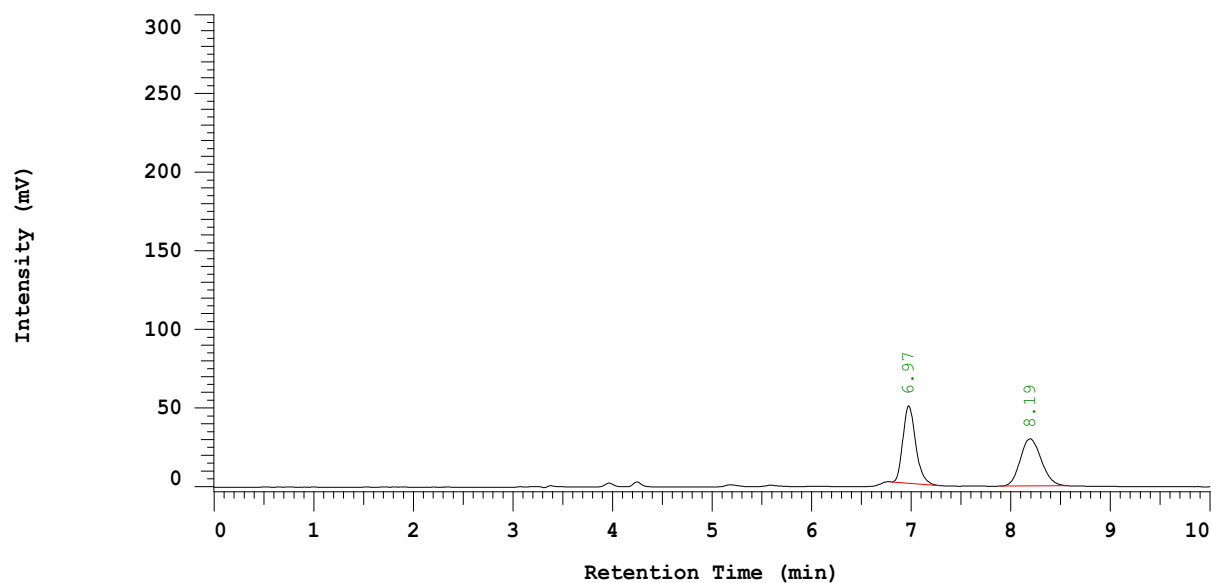

Processing Method: Ea/Hx

Column Type: IC

Method Developer: YVW

Method Description:

Chrom Type: Fixed WL Chromatogram, 280 nm

Peak Quantitation: AREA

Calculation Method: EXT-STD

Scale Factor 1: 1.000

| No. | RT   | Area   | Height | Area %  |
|-----|------|--------|--------|---------|
| 1   | 6.97 | 440388 | 49217  | 50.258  |
| 2   | 8.19 | 435862 | 29917  | 49.742  |
|     |      | 876250 | 79134  | 100.000 |

Peak rejection level: 1000

Fig S299. HPLC analysis of the racemic compound anti-3g,  
as a standard for comparison (Table 3, entry 7).

**D-2000 Elite HPLC System Manager Report**Analyzed Date and Time: 2015/05/04  
05:06 下午Reported Date and Time: 2015/05/04  
05:34 下午Processed Date and Time: 2015/05/04  
05:33 下午

Data Path: D:\LCH\DATA\0209\

Processing Method: Ea/Hx

System (acquisition): Sys 1

Series: 0209

Application(data): LCH

Vial Number: 2

Sample Name: LCH-2-373-p2-chi

Vial Type: UNK

Injection from this vial: 1 of 1

Volume: 20.0 ul

Sample Description: 15%Ea/Hx-1ml/min-col IC

Chrom Type: Fixed WL Chromatogram, 280 nm

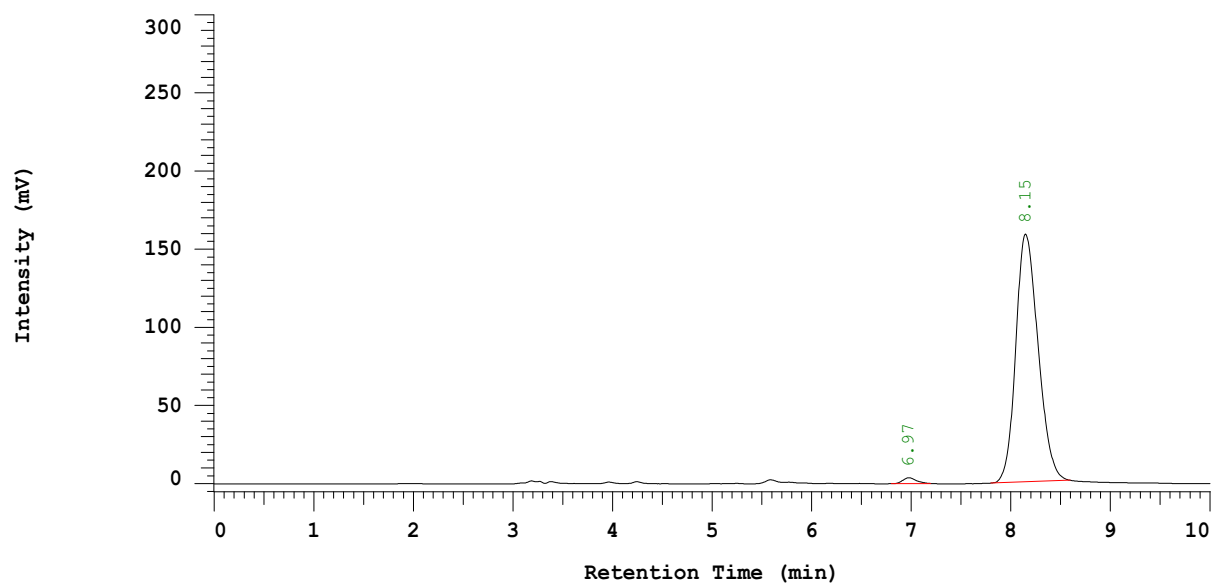

Processing Method: Ea/Hx

Column Type: IC

Method Developer: YVW

Method Description:

Chrom Type: Fixed WL Chromatogram, 280 nm

Peak Quantitation: AREA

Calculation Method: EXT-STD

Scale Factor 1: 1.000

| No. | RT   | Area    | Height | Area %  |
|-----|------|---------|--------|---------|
| 1   | 6.97 | 35648   | 3771   | 1.424   |
| 2   | 8.15 | 2467842 | 158545 | 98.576  |
|     |      | 2503490 | 162316 | 100.000 |

Peak rejection level: 1000

Fig S300. HPLC analysis of the chiral compound anti-3g obtained, (Table 3, entry 7).



**D-2000 Elite HPLC System Manager Report**Analyzed Date and Time: 2015/05/04  
05:20 下午Reported Date and Time: 2015/05/04  
05:33 下午Processed Date and Time: 2015/05/04  
05:32 下午

Data Path: D:\LCH\DATA\0210\

Processing Method: Ea/Hx

System (acquisition): Sys 1

Series: 0210

Application(data): LCH

Vial Number: 3

Sample Name: LCH-2-373-p2-co

Vial Type: UNK

Injection from this vial: 1 of 1

Volume: 20.0 ul

Sample Description: 15%Ea/Hx-1ml/min-col IC

Chrom Type: Fixed WL Chromatogram, 280 nm

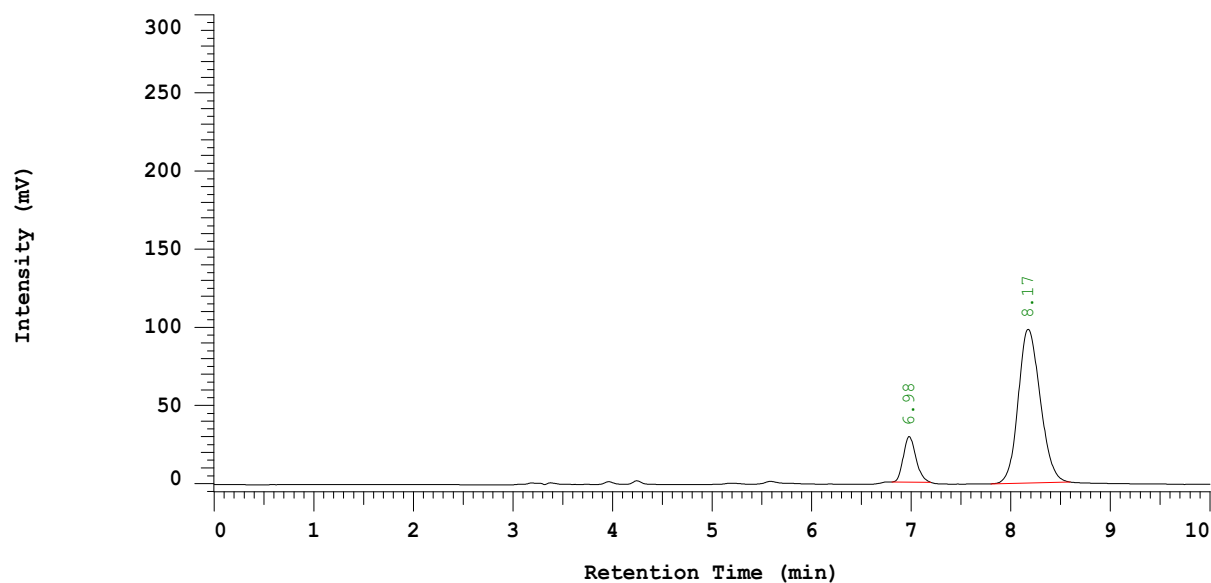

Processing Method: Ea/Hx

Column Type: IC

Method Developer: YVW

Method Description:

Chrom Type: Fixed WL Chromatogram, 280 nm

Peak Quantitation: AREA

Calculation Method: EXT-STD

Scale Factor 1: 1.000

| No. | RT   | Area    | Height | Area %  |
|-----|------|---------|--------|---------|
| 1   | 6.98 | 256545  | 29146  | 14.522  |
| 2   | 8.17 | 1510111 | 98393  | 85.478  |
|     |      | 1766656 | 127539 | 100.000 |

Peak rejection level: 1000

Fig S301. HPLC analysis of the mixture of chiral compound anti-3g obtained and the racemic compound anti-3g, for comparison (Table 3, entry 7).

**D-2000 Elite HPLC System Manager Report**

Analyzed Date and Time: 2015/04/29  
10:26 下午

Reported Date and Time: 2015/04/29  
10:38 下午

Processed Date and Time: 2015/04/29  
10:37 下午

Data Path: D:\LCH\DATA\0178\

Processing Method: Ea/Hx

System (acquisition): Sys 1

Series: 0178

Application(data): LCH

Vial Number: 1

Sample Name: LCH-2-390-p1-rac

Vial Type: UNK

Injection from this vial: 1 of 1

Volume: 20.0 ul

Sample Description: 22%Ea/Hx-1ml/min-col IC

Chrom Type: Fixed WL Chromatogram, 290 nm

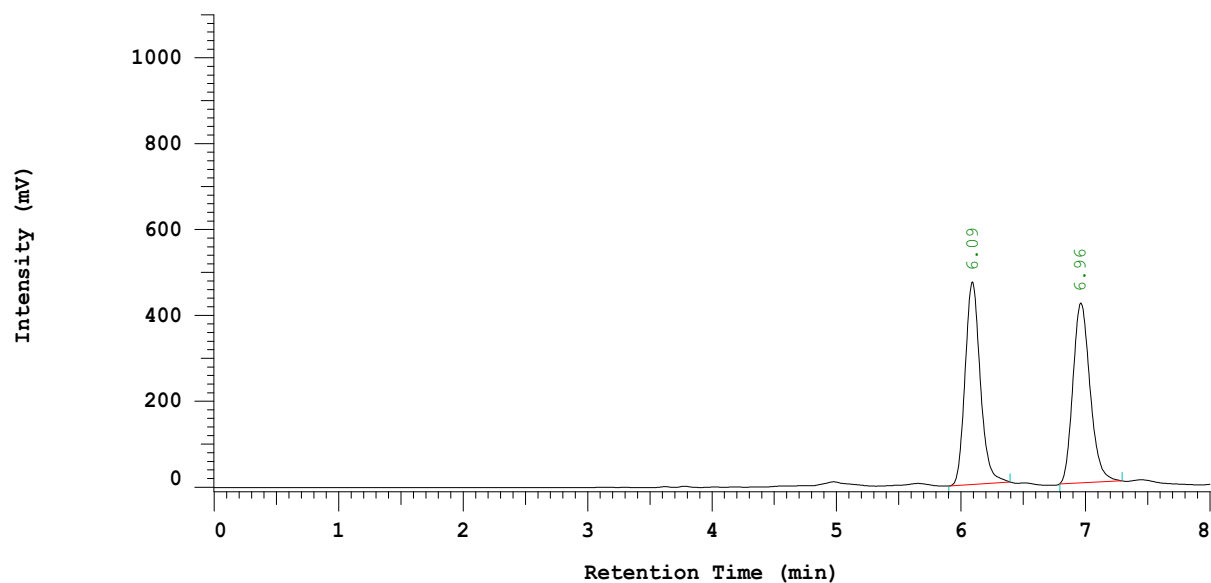

Processing Method: Ea/Hx

Column Type: IC

Method Developer: YVW

Method Description:

Chrom Type: Fixed WL Chromatogram, 290 nm

Peak Quantitation: AREA

Calculation Method: EXT-STD

Scale Factor 1: 1.000

| No. | RT   | Area    | Height | Area %  |
|-----|------|---------|--------|---------|
| 1   | 6.09 | 3977158 | 471063 | 49.840  |
| 2   | 6.96 | 4002636 | 418795 | 50.160  |
|     |      | 7979794 | 889858 | 100.000 |

Peak rejection level: 1000

**Fig S302. HPLC analysis of the racemic compound syn-3h, as a standard for comparison (Table 3, entry 8).**

**D-2000 Elite HPLC System Manager Report**

Analyzed Date and Time: 2015/04/29  
10:39 下午

Reported Date and Time: 2015/04/30  
01:03 上午

Processed Date and Time: 2015/04/30  
01:03 上午

Data Path: D:\LCH\DATA\0179\

Processing Method: Ea/Hx

System (acquisition): Sys 1

Series: 0179

Application(data): LCH

Vial Number: 2

Sample Name: LCH-2-390-p1-chi

Vial Type: UNK

Injection from this vial: 1 of 1

Volume: 20.0 ul

Sample Description: 22%Ea/Hx-1ml/min-col IC

Chrom Type: Fixed WL Chromatogram, 290 nm

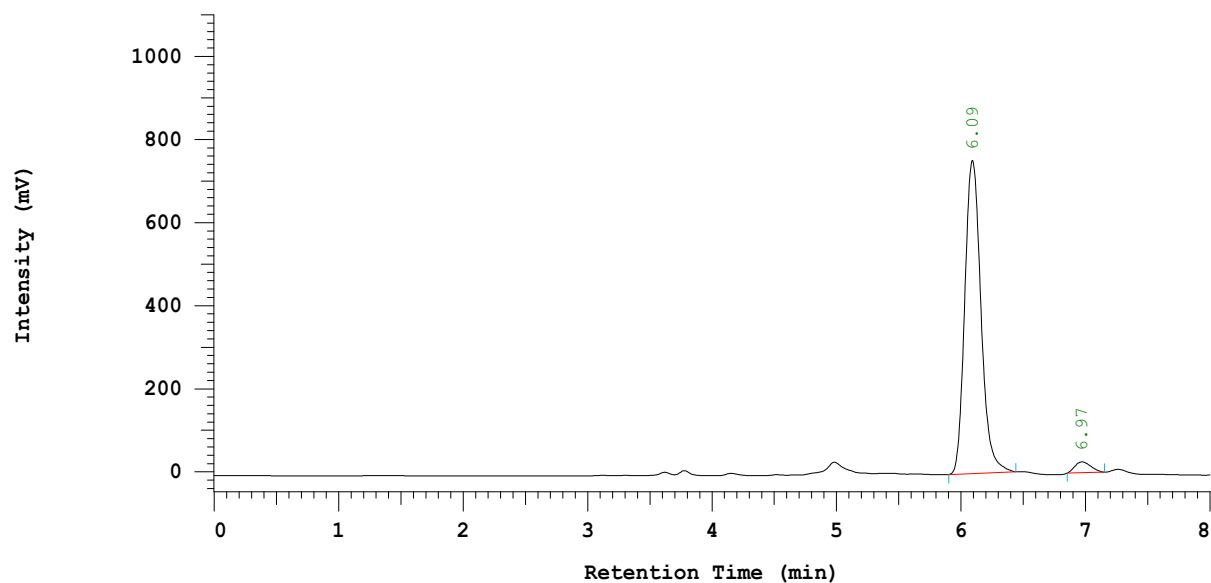

Processing Method: Ea/Hx

Column Type: IC

Method Developer: YVW

Method Description:

Chrom Type: Fixed WL Chromatogram, 290 nm

Peak Quantitation: AREA

Calculation Method: EXT-STD

Scale Factor 1: 1.000

| No. | RT   | Area    | Height | Area %  |
|-----|------|---------|--------|---------|
| 1   | 6.09 | 6795782 | 752923 | 96.677  |
| 2   | 6.97 | 233598  | 26366  | 3.323   |
|     |      | 7029380 | 779289 | 100.000 |

Peak rejection level: 1000

Fig S303. HPLC analysis of the chiral compound syn-3h obtained, (Table 3, entry 8).

**D-2000 Elite HPLC System Manager Report**Analyzed Date and Time: 2015/04/29  
10:54 下午Reported Date and Time: 2015/04/29  
11:03 下午Processed Date and Time: 2015/04/29  
11:03 下午

Data Path: D:\LCH\DATA\0180\

Processing Method: Ea/Hx

System (acquisition): Sys 1

Series: 0180

Application(data): LCH

Vial Number: 3

Sample Name: LCH-2-390-p1-co

Vial Type: UNK

Injection from this vial: 1 of 1

Volume: 20.0 ul

Sample Description: 22%Ea/Hx-1ml/min-col IC

Chrom Type: Fixed WL Chromatogram, 290 nm

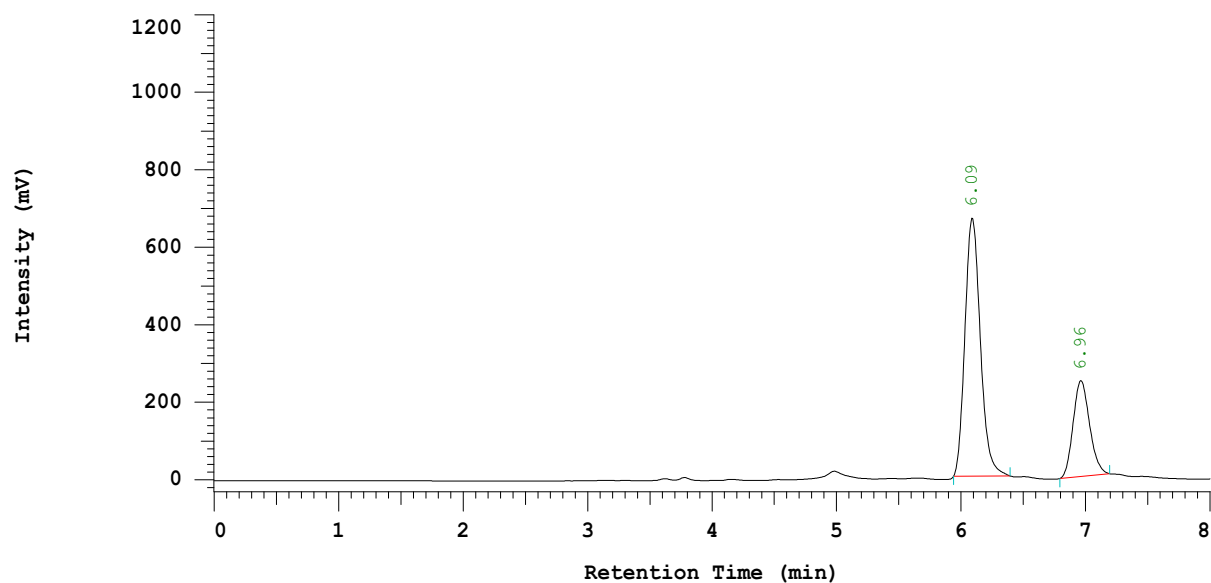

Processing Method: Ea/Hx

Column Type: IC

Method Developer: YVW

Method Description:

Chrom Type: Fixed WL Chromatogram, 290 nm

Peak Quantitation: AREA

Calculation Method: EXT-STD

Scale Factor 1: 1.000

| No. | RT   | Area    | Height | Area %  |
|-----|------|---------|--------|---------|
| 1   | 6.09 | 5724797 | 665222 | 71.651  |
| 2   | 6.96 | 2265054 | 247311 | 28.349  |
|     |      | 7989851 | 912533 | 100.000 |

Peak rejection level: 1000

Fig S304. HPLC analysis of the mixture of chiral compound syn-3h obtained and the racemic compound syn-3h, for comparison (Table 3, entry 8).

**D-2000 Elite HPLC System Manager Report**Analyzed Date and Time: 2015/04/29  
11:35 下午Reported Date and Time: 2015/04/30  
12:41 上午Processed Date and Time: 2015/04/30  
12:40 上午

Data Path: D:\LCH\DATA\0182\

Processing Method: Ea/Hx

System (acquisition): Sys 1

Series: 0182

Application(data): LCH

Vial Number: 1

Sample Name: LCH-2-390-p2-rac

Vial Type: UNK

Injection from this vial: 1 of 1

Volume: 20.0 ul

Sample Description: 22%Ea/Hx-1ml/min-col IC

Chrom Type: Fixed WL Chromatogram, 280 nm

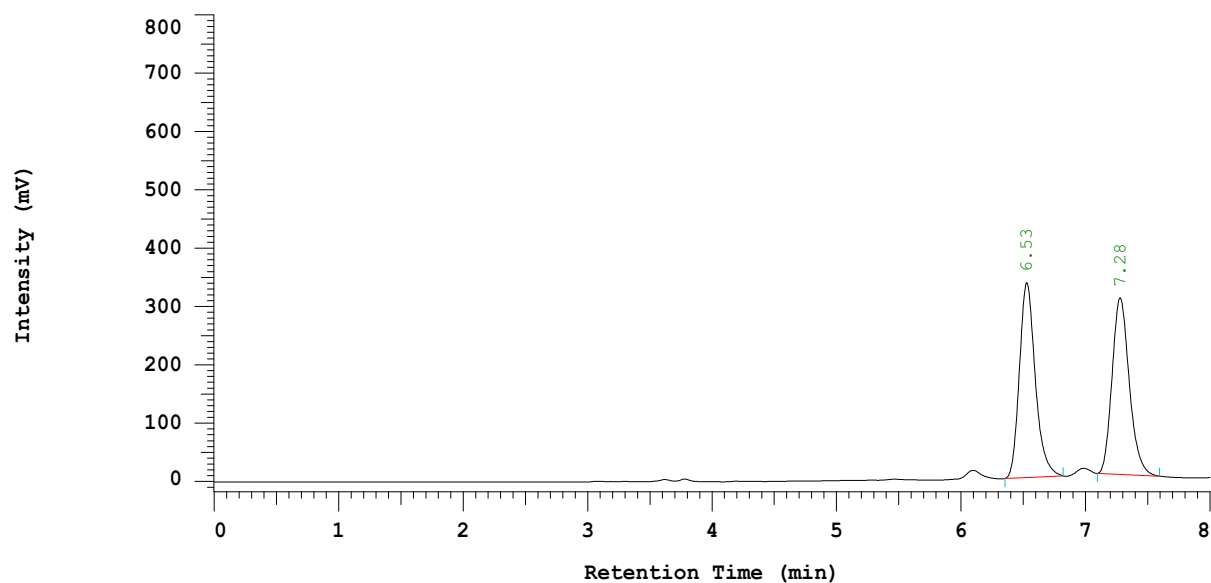

Processing Method: Ea/Hx

Column Type: IC

Method Developer: YVW

Method Description:

Chrom Type: Fixed WL Chromatogram, 280 nm

Peak Quantitation: AREA

Calculation Method: EXT-STD

Scale Factor 1: 1.000

| No. | RT   | Area    | Height | Area %  |
|-----|------|---------|--------|---------|
| 1   | 6.53 | 2954061 | 334115 | 50.438  |
| 2   | 7.28 | 2902795 | 302695 | 49.562  |
|     |      | 5856856 | 636810 | 100.000 |

Peak rejection level: 1000

Fig S305. HPLC analysis of the racemic compound anti-3h,  
as a standard for comparison (Table 3, entry 8).

**D-2000 Elite HPLC System Manager Report**Analyzed Date and Time: 2015/04/30  
12:06 上午Reported Date and Time: 2015/04/30  
01:18 上午Processed Date and Time: 2015/04/30  
01:17 上午

Data Path: D:\LCH\DATA\0184\

Processing Method: Ea/Hx

System (acquisition): Sys 1

Series: 0184

Application(data): LCH

Vial Number: 1

Sample Name: LCH-2-390-p2-chi

Vial Type: UNK

Injection from this vial: 1 of 1

Volume: 20.0 ul

Sample Description: 22%Ea/Hx-1ml/min-col IC

Chrom Type: Fixed WL Chromatogram, 280 nm

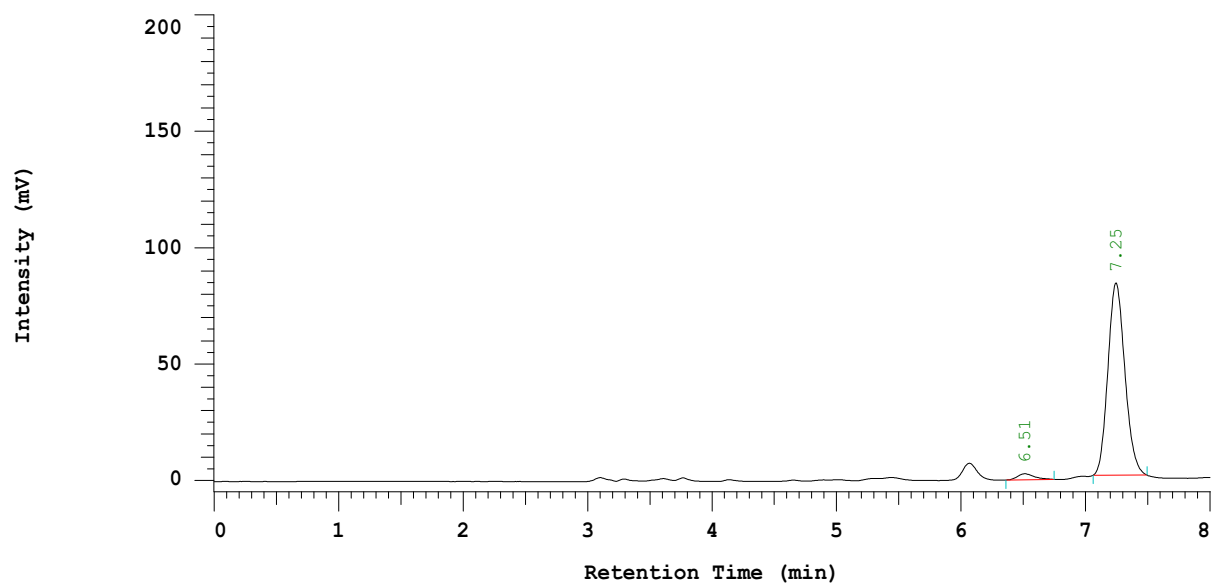

Processing Method: Ea/Hx

Column Type: IC

Method Developer: YVW

Method Description:

Chrom Type: Fixed WL Chromatogram, 280 nm

Peak Quantitation: AREA

Calculation Method: EXT-STD

Scale Factor 1: 1.000

| No. | RT   | Area   | Height | Area %  |
|-----|------|--------|--------|---------|
| 1   | 6.51 | 23850  | 2608   | 2.960   |
| 2   | 7.25 | 781903 | 82489  | 97.040  |
|     |      | 805753 | 85097  | 100.000 |

Peak rejection level: 1000

Fig S306. HPLC analysis of the chiral compound anti-3h obtained, (Table 3, entry 8).

**D-2000 Elite HPLC System Manager Report**Analyzed Date and Time: 2015/04/30  
12:16 上午Reported Date and Time: 2015/04/30  
12:35 上午Processed Date and Time: 2015/04/30  
12:35 上午

Data Path: D:\LCH\DATA\0185\

Processing Method: Ea/Hx

System (acquisition): Sys 1

Series: 0185

Application(data): LCH

Vial Number: 2

Sample Name: LCH-2-390-p2-co

Vial Type: UNK

Injection from this vial: 1 of 1

Volume: 20.0 ul

Sample Description: 22%Ea/Hx-1ml/min-col IC

Chrom Type: Fixed WL Chromatogram, 280 nm

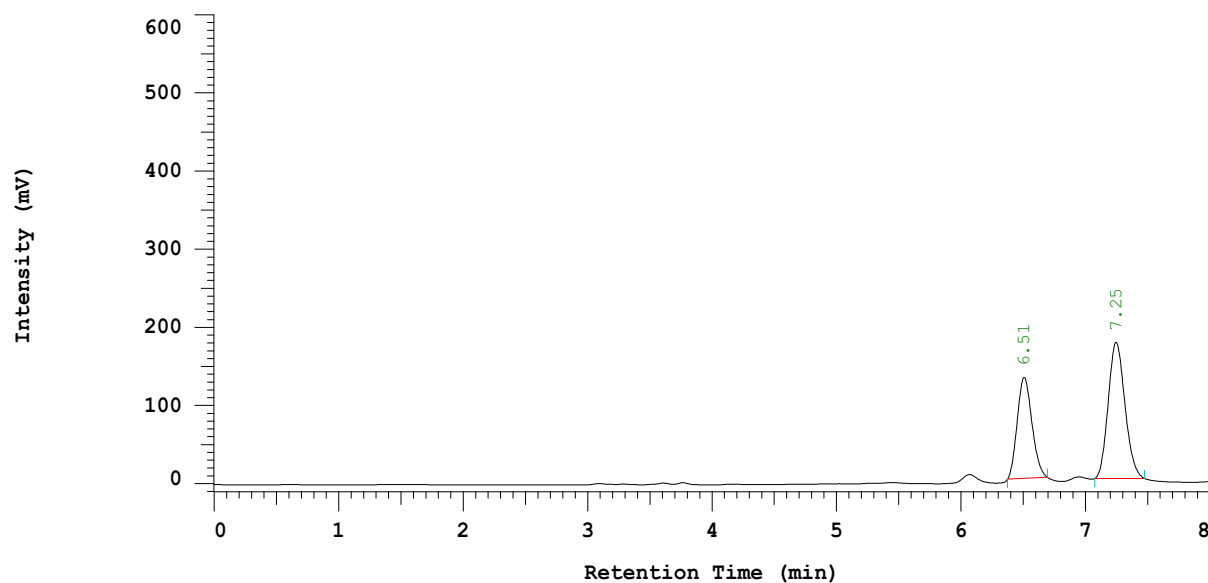

Processing Method: Ea/Hx

Column Type: IC

Method Developer: YVW

Method Description:

Chrom Type: Fixed WL Chromatogram, 280 nm

Peak Quantitation: AREA

Calculation Method: EXT-STD

Scale Factor 1: 1.000

| No. | RT   | Area    | Height | Area %  |
|-----|------|---------|--------|---------|
| 1   | 6.51 | 1061408 | 129392 | 39.487  |
| 2   | 7.25 | 1626552 | 174423 | 60.513  |
|     |      | 2687960 | 303815 | 100.000 |

Peak rejection level: 1000

Fig S307. HPLC analysis of the mixture of chiral compound anti-3h obtained and the racemic compound anti-3h, for comparison (Table 3, entry 8).

**D-2000 Elite HPLC System Manager Report**Analyzed Date and Time: 2015/05/01  
08:20 下午Reported Date and Time: 2015/05/01  
08:54 下午Processed Date and Time: 2015/05/01  
08:54 下午

Data Path: D:\LCH\DATA\0195\

Processing Method: Ea/Hx

System (acquisition): Sys 1

Series: 0195

Application(data): LCH

Vial Number: 1

Sample Name: LCH-2-394-p1-rac

Vial Type: UNK

Injection from this vial: 1 of 1

Volume: 20.0 ul

Sample Description: 10%Ea/Hx-1ml/min-col IC

Chrom Type: Fixed WL Chromatogram, 300 nm

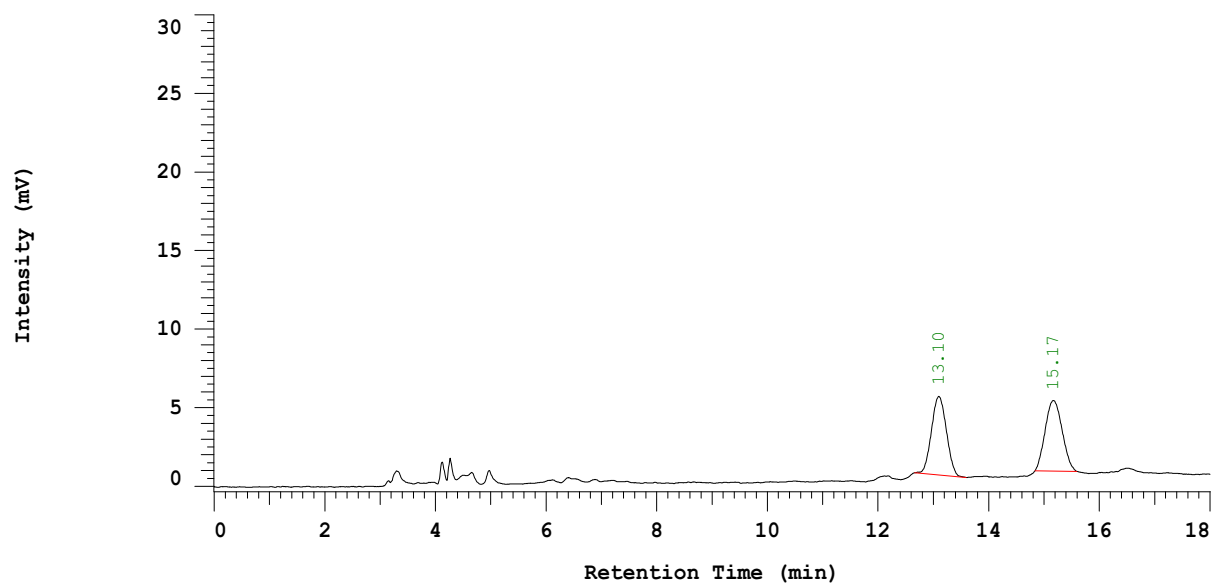

Processing Method: Ea/Hx

Column Type: IC

Method Developer: YVW

Method Description:

Chrom Type: Fixed WL Chromatogram, 300 nm

Peak Quantitation: AREA

Calculation Method: EXT-STD

Scale Factor 1: 1.000

| No. | RT    | Area   | Height | Area %  |
|-----|-------|--------|--------|---------|
| 1   | 13.10 | 94586  | 5011   | 49.593  |
| 2   | 15.17 | 96140  | 4495   | 50.407  |
|     |       | 190726 | 9506   | 100.000 |

Peak rejection level: 1000

Fig S308. HPLC analysis of the racemic compound syn-3i,  
as a standard for comparison (Table 3, entry 9).



**D-2000 Elite HPLC System Manager Report**Analyzed Date and Time: 2015/05/01  
08:45 下午Reported Date and Time: 2015/05/01  
09:13 下午Processed Date and Time: 2015/05/01  
09:13 下午

Data Path: D:\LCH\DATA\0196\

Processing Method: Ea/Hx

System (acquisition): Sys 1

Series: 0196

Application(data): LCH

Vial Number: 2

Sample Name: LCH-2-394-p1-chi

Vial Type: UNK

Injection from this vial: 1 of 1

Volume: 20.0 ul

Sample Description: 10%Ea/Hx-1ml/min-col IC

Chrom Type: Fixed WL Chromatogram, 300 nm

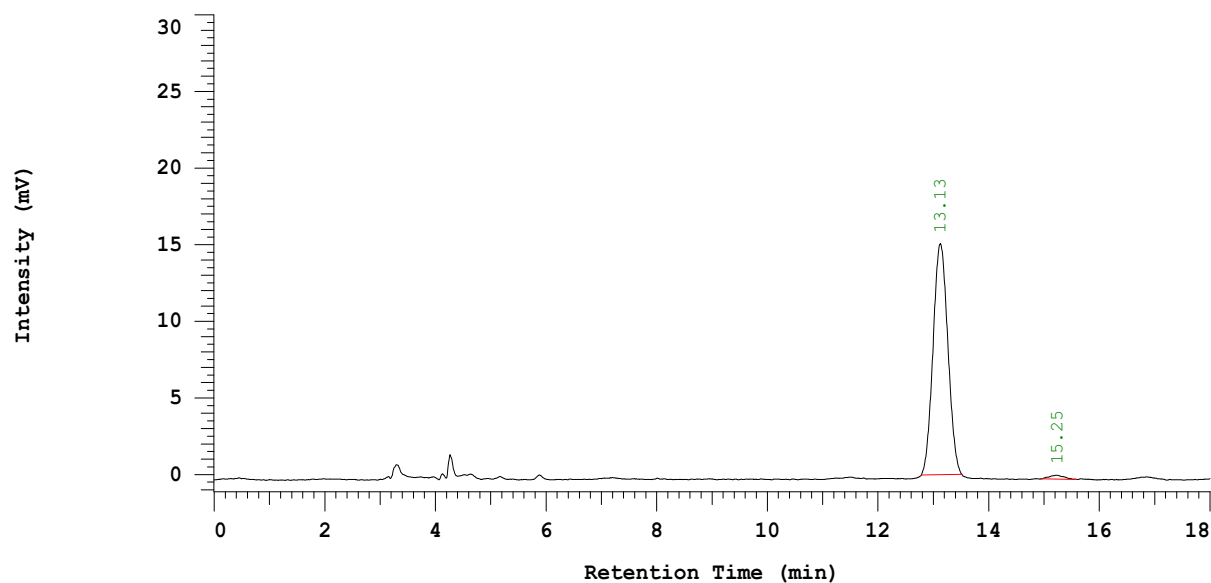

Processing Method: Ea/Hx

Column Type: IC

Method Developer: YVW

Method Description:

Chrom Type: Fixed WL Chromatogram, 300 nm

Peak Quantitation: AREA

Calculation Method: EXT-STD

Scale Factor 1: 1.000

| No. | RT    | Area   | Height | Area %  |
|-----|-------|--------|--------|---------|
| 1   | 13.13 | 280782 | 15070  | 98.356  |
| 2   | 15.25 | 4692   | 255    | 1.644   |
|     |       | 285474 | 15325  | 100.000 |

Peak rejection level: 1000

Fig S309. HPLC analysis of the chiral compound syn-3i obtained, (Table 3, entry 9).

**D-2000 Elite HPLC System Manager Report**Analyzed Date and Time: 2015/05/01  
09:05 下午Reported Date and Time: 2015/05/01  
09:26 下午Processed Date and Time: 2015/05/01  
09:25 下午

Data Path: D:\LCH\DATA\0197\

Processing Method: Ea/Hx

System (acquisition): Sys 1

Series: 0197

Application(data): LCH

Vial Number: 3

Sample Name: LCH-2-394-p1-co

Vial Type: UNK

Injection from this vial: 1 of 1

Volume: 20.0 ul

Sample Description: 10%Ea/Hx-1ml/min-col IC

Chrom Type: Fixed WL Chromatogram, 300 nm

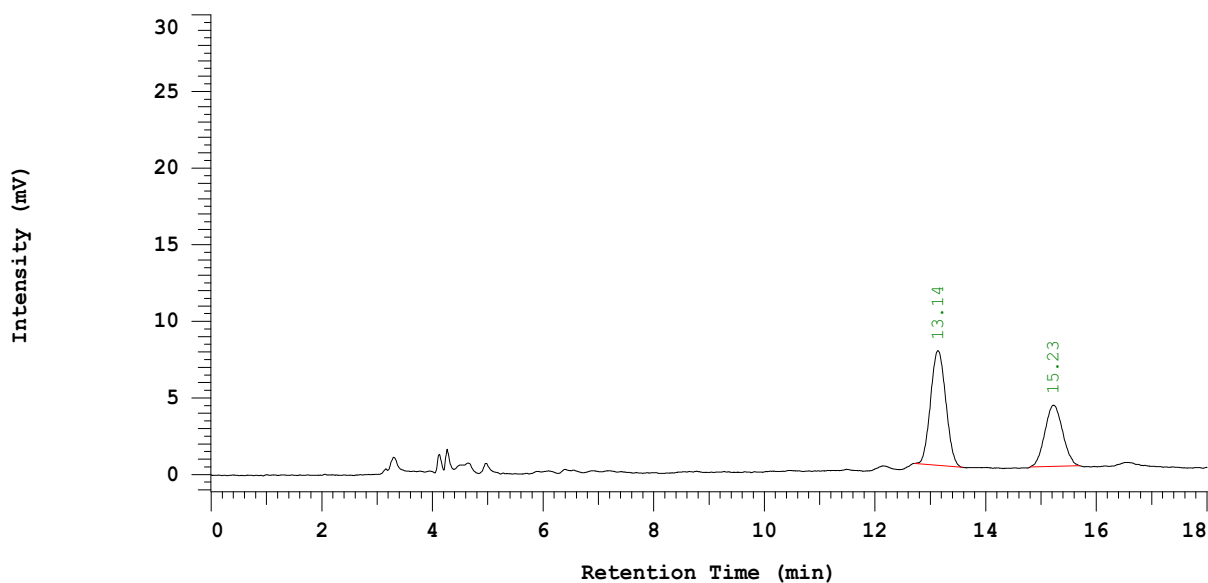

Processing Method: Ea/Hx

Column Type: IC

Method Developer: YVW

Method Description:

Chrom Type: Fixed WL Chromatogram, 300 nm

Peak Quantitation: AREA

Calculation Method: EXT-STD

Scale Factor 1: 1.000

| No. | RT    | Area   | Height | Area %  |
|-----|-------|--------|--------|---------|
| 1   | 13.14 | 143572 | 7477   | 61.616  |
| 2   | 15.23 | 89437  | 3990   | 38.384  |
|     |       | 233009 | 11467  | 100.000 |

Peak rejection level: 1000

Fig S310. HPLC analysis of the mixture of chiral compound syn-3i obtained and the racemic compound syn-3i, for comparison (Table 3, entry 9).

**D-2000 Elite HPLC System Manager Report**Analyzed Date and Time: 2015/05/04  
01:36 下午Reported Date and Time: 2015/05/04  
01:57 下午Processed Date and Time: 2015/05/04  
01:56 下午

Data Path: D:\LCH\DATA\0201\

Processing Method: Ea/Hx

System (acquisition): Sys 1

Series: 0201

Application(data): LCH

Vial Number: 1

Sample Name: LCH-2-394-p2-rac

Vial Type: UNK

Injection from this vial: 1 of 1

Volume: 20.0 ul

Sample Description: 20%Ea/Hx-1ml/min-col IC

Chrom Type: Fixed WL Chromatogram, 280 nm

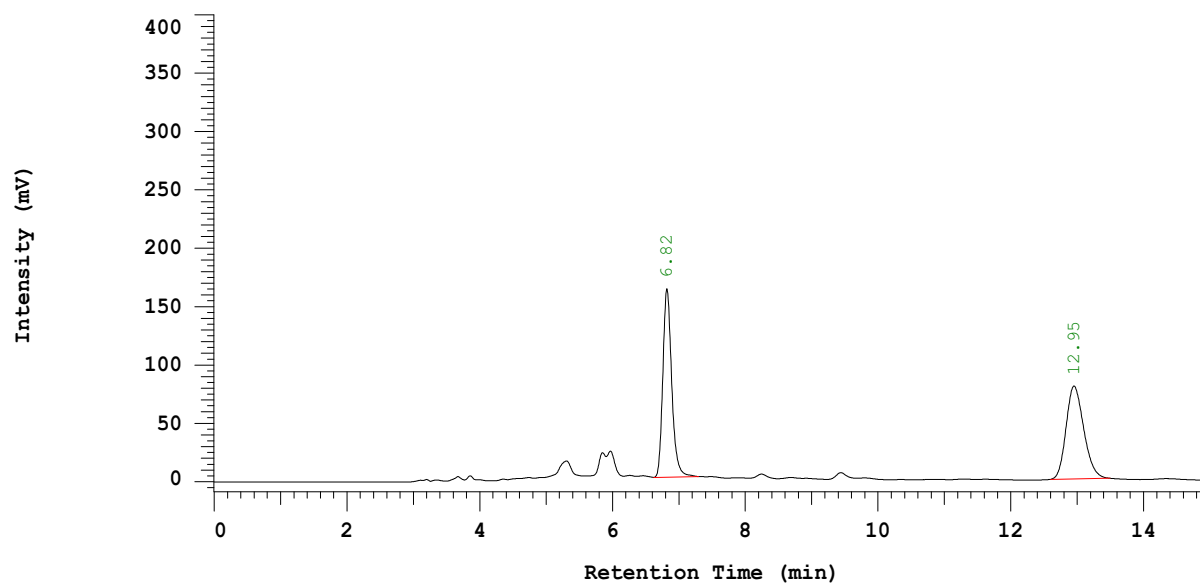

Processing Method: Ea/Hx

Column Type: IC

Method Developer: YVW

Method Description:

Chrom Type: Fixed WL Chromatogram, 280 nm

Peak Quantitation: AREA

Calculation Method: EXT-STD

Scale Factor 1: 1.000

| No. | RT    | Area    | Height | Area %  |
|-----|-------|---------|--------|---------|
| 1   | 6.82  | 1495523 | 161453 | 50.471  |
| 2   | 12.95 | 1467638 | 79505  | 49.529  |
|     |       | 2963161 | 240958 | 100.000 |

Peak rejection level: 1000

Fig S311. HPLC analysis of the racemic compound anti-3i, as a standard for comparison (Table 3, entry 9).

**D-2000 Elite HPLC System Manager Report**Analyzed Date and Time: 2015/05/04  
01:52 下午Reported Date and Time: 2015/05/04  
02:22 下午Processed Date and Time: 2015/05/04  
02:22 下午

Data Path: D:\LCH\DATA\0202\

Processing Method: Ea/Hx

System (acquisition): Sys 1

Series: 0202

Application(data): LCH

Vial Number: 2

Sample Name: LCH-2-394-p2-chi

Vial Type: UNK

Injection from this vial: 1 of 1

Volume: 20.0 ul

Sample Description: 20%Ea/Hx-1ml/min-col IC

Chrom Type: Fixed WL Chromatogram, 280 nm

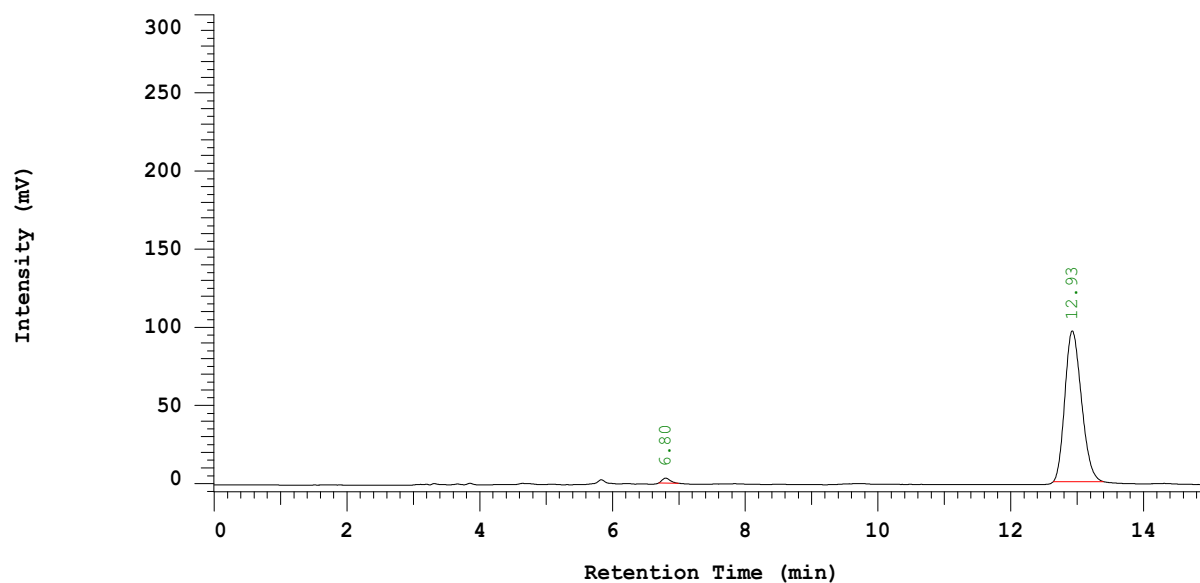

Processing Method: Ea/Hx

Column Type: IC

Method Developer: YVW

Method Description:

Chrom Type: Fixed WL Chromatogram, 280 nm

Peak Quantitation: AREA

Calculation Method: EXT-STD

Scale Factor 1: 1.000

| No. | RT    | Area    | Height | Area %  |
|-----|-------|---------|--------|---------|
| 1   | 6.80  | 25929   | 3153   | 1.532   |
| 2   | 12.93 | 1666300 | 96362  | 98.468  |
|     |       | 1692229 | 99515  | 100.000 |

Peak rejection level: 1000

Fig S312. HPLC analysis of the chiral compound anti-3i obtained, (Table 3, entry 9).

**D-2000 Elite HPLC System Manager Report**Analyzed Date and Time: 2015/05/04  
02:08 下午Reported Date and Time: 2015/05/04  
02:26 下午Processed Date and Time: 2015/05/04  
02:26 下午

Data Path: D:\LCH\DATA\0203\

Processing Method: Ea/Hx

System (acquisition): Sys 1

Series: 0203

Application(data): LCH

Vial Number: 3

Sample Name: LCH-2-394-p2-co

Vial Type: UNK

Injection from this vial: 1 of 1

Volume: 20.0 ul

Sample Description: 20%Ea/Hx-1ml/min-col IC

Chrom Type: Fixed WL Chromatogram, 280 nm

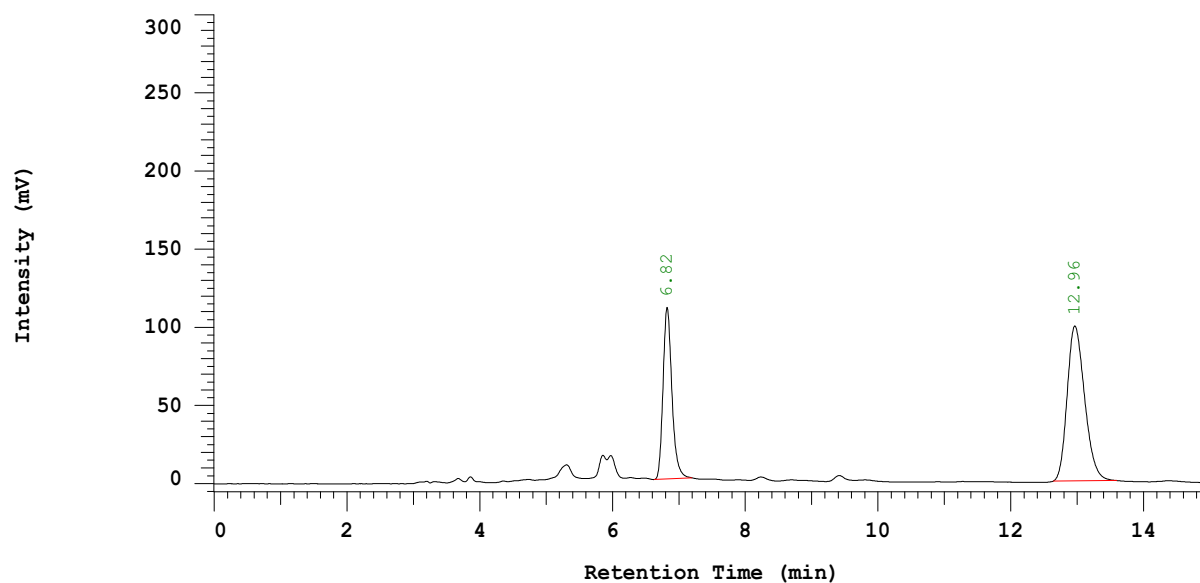

Processing Method: Ea/Hx

Column Type: IC

Method Developer: YVW

Method Description:

Chrom Type: Fixed WL Chromatogram, 280 nm

Peak Quantitation: AREA

Calculation Method: EXT-STD

Scale Factor 1: 1.000

| No. | RT    | Area    | Height | Area %  |
|-----|-------|---------|--------|---------|
| 1   | 6.82  | 1018340 | 109718 | 36.013  |
| 2   | 12.96 | 1809398 | 99118  | 63.987  |
|     |       | 2827738 | 208836 | 100.000 |

Peak rejection level: 1000

Fig S313. HPLC analysis of the mixture of chiral compound anti-3i obtained and the racemic compound anti-3i, for comparison (Table 3, entry 9).
